# Supplementary material for: The ACF chromatin-remodeling complex is essential for Polycomb repression
Source: PubMed Central journal article supplement (PMC9038196; doi:10.7554/elife.77595), 2022-03-08
Supplement: elife-77595-fig4-figsupp1-data6.pdf [file elife-77595-fig4-figsupp1-data6.pdf]

| WT | EPR-1-Dam          |  | ACF1-Dam |                      | unrelated |  |   |  |   |  |
|----|--------------------|--|----------|----------------------|-----------|--|---|--|---|--|
|    | <u><i>Δeed</i></u> |  |          | <u><i>Δset-7</i></u> |           |  |   |  |   |  |
|    | -                  |  | -        |                      | -         |  | - |  | - |  |

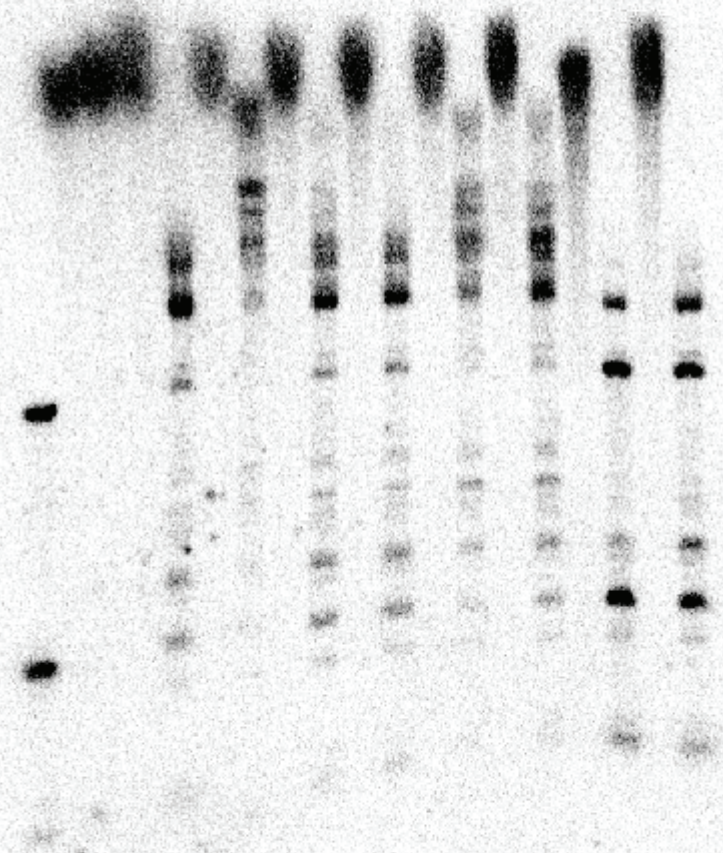

NCU05173
