# Supplementary material for: The ACF chromatin-remodeling complex is essential for Polycomb repression
Source: PubMed Central journal article supplement (PMC9038196; doi:10.7554/elife.77595), 2022-03-08
Supplement: elife-77595-fig4-figsupp1-data7.pdf [file elife-77595-fig4-figsupp1-data7.pdf]

|                           |                                |  |                                  |  |  |                  |
|---------------------------|--------------------------------|--|----------------------------------|--|--|------------------|
|                           | EPR-1-<br>Dam                  |  | ACF1-Dam                         |  |  |                  |
| <u>WT</u>                 | <u><math>\Delta eed</math></u> |  | <u><math>\Delta set-7</math></u> |  |  | <u>unrelated</u> |
| -   -   -   -   -   -   - |                                |  |                                  |  |  |                  |

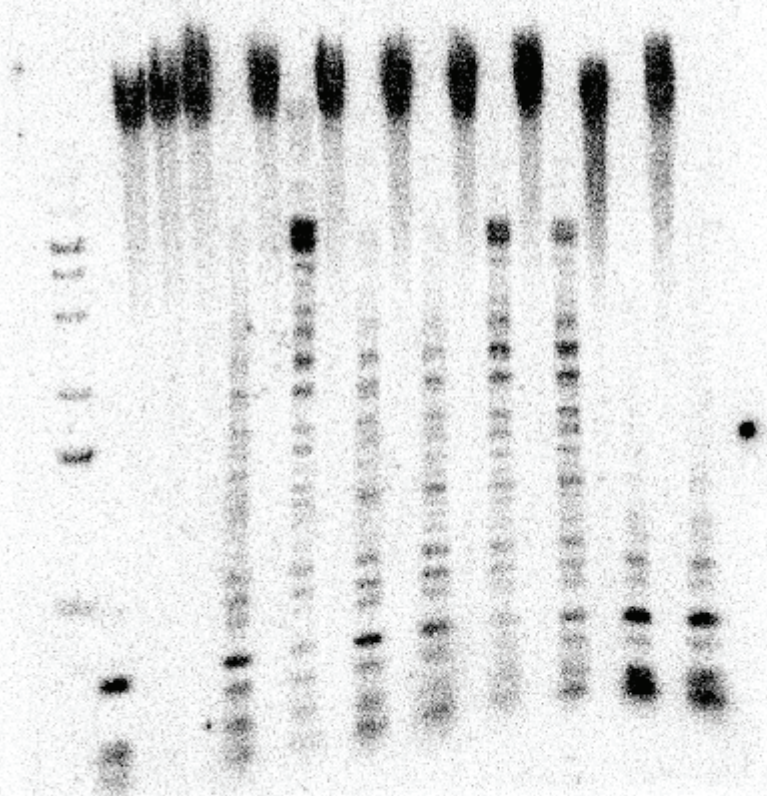

Tel VIII
