# Supplementary material for: The ACF chromatin-remodeling complex is essential for Polycomb repression
Source: PubMed Central journal article supplement (PMC9038196; doi:10.7554/elife.77595), 2022-03-08
Supplement: elife-77595-fig4-figsupp1-data8.pdf [file elife-77595-fig4-figsupp1-data8.pdf]

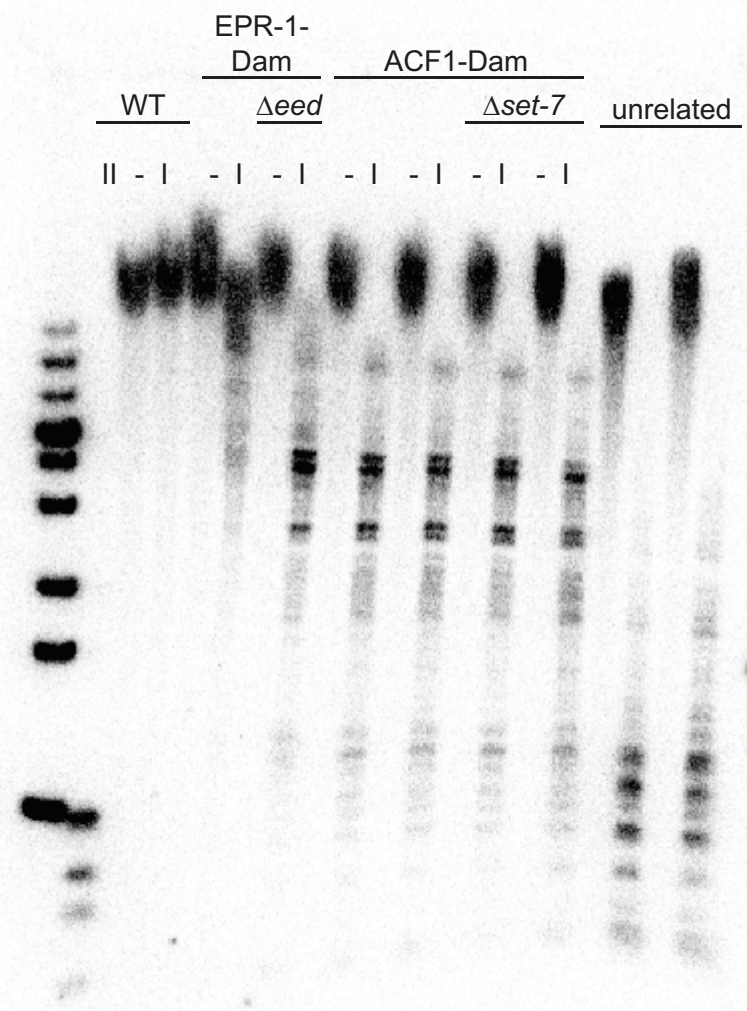

*his-3*
