# Supplementary material for: The ACF chromatin-remodeling complex is essential for Polycomb repression
Source: eLife. 2022 Mar 8;11:e77595. doi: 10.7554/eLife.77595 (PMC9038196; doi:10.7554/eLife.77595)
Supplement: Figure 2—source data 1. [file elife-77595-fig2-data1.xlsx]

## Sheet: ISWI >0.4%
Experiment name	Biological sample category	Biological sample name	MS/MS sample name	Cluster	Protein name	Protein accession numbers	Database sources	Protein molecular weight (Da)	Protein identification probability	Exclusive unique peptide count	Exclusive unique spectrum count	Total spectrum count	Percentage of total spectra	Percentage sequence coverage
Vince Research01272020	Uncategorized Sample	Vince	GPM22200021135	Cluster of | Neurospora crassa OR74A | chromatin remodelling complex ATPase chain ISW1 | protein | length=1126 (NCU03875)	| Neurospora crassa OR74A | chromatin remodelling complex ATPase chain ISW1 | protein | length=1126	NCU03875	Neurospora crassa OR74A_rev.fasta	128534	1	326	581	1287	0.0607	0.761
Vince Research01272020	Uncategorized Sample	Vince	GPM22200021135	Cluster of | Neurospora crassa OR74A | embden-meyerhof pathway-16 | protein | length=748 (NCU01728)	| Neurospora crassa OR74A | embden-meyerhof pathway-16 | protein | length=748	NCU01728	Neurospora crassa OR74A_rev.fasta	84417.7	1	204	335	486	0.0229	0.826
Vince Research01272020	Uncategorized Sample	Vince	GPM22200021135	Cluster of | Neurospora crassa OR74A | hypothetical protein | protein | length=663 (NCU00412)	| Neurospora crassa OR74A | hypothetical protein | protein | length=663	NCU00412	Neurospora crassa OR74A_rev.fasta	73743.1	1	80	153	196	0.00925	0.624
Vince Research01272020	Uncategorized Sample	Vince	GPM22200021135	Cluster of | Neurospora crassa OR74A | hypothetical protein | protein | length=789 (NCU09388)	| Neurospora crassa OR74A | hypothetical protein | protein | length=789	NCU09388	Neurospora crassa OR74A_rev.fasta	87866.1	1	83	142	169	0.00797	0.665
Vince Research01272020	Uncategorized Sample	Vince	GPM22200021135	Cluster of | Neurospora crassa OR74A | PWWP domain-containing protein | protein | length=640 (NCU02684)	| Neurospora crassa OR74A | PWWP domain-containing protein | protein | length=640	NCU02684	Neurospora crassa OR74A_rev.fasta	69450.8	1	52	104	114	0.00538	0.603
Vince Research01272020	Uncategorized Sample	Vince	GPM22200021135	Cluster of | Neurospora crassa OR74A | heat shock protein 70 | protein | length=646 (NCU09602)	| Neurospora crassa OR74A | heat shock protein 70 | protein | length=646	NCU09602	Neurospora crassa OR74A_rev.fasta	70555.4	1	47	87	109	0.00514	0.601
Vince Research01272020	Uncategorized Sample	Vince	GPM22200021135	Cluster of | Neurospora crassa OR74A | glucose-regulated protein | protein | length=661 (NCU03982)	| Neurospora crassa OR74A | glucose-regulated protein | protein | length=661	NCU03982	Neurospora crassa OR74A_rev.fasta	72333.2	1	47	92	107	0.00505	0.528
Vince Research01272020	Uncategorized Sample	Vince	GPM22200021135	Cluster of | Neurospora crassa OR74A | 60S ribosomal protein L4-A | protein | length=361 (NCU03757)	| Neurospora crassa OR74A | 60S ribosomal protein L4-A | protein | length=361	NCU03757	Neurospora crassa OR74A_rev.fasta	38814.2	1	49	79	97	0.00458	0.679
Vince Research01272020	Uncategorized Sample	Vince	GPM22200021135	Cluster of | Neurospora crassa OR74A | Telomere binding protein | protein | length=1092 (NCU00164)	| Neurospora crassa OR74A | Telomere binding protein | protein | length=1092	NCU00164	Neurospora crassa OR74A_rev.fasta	123513	1	58	85	96	0.00453	0.516

## Sheet: CRF4-2 >0.4%
Experiment name	Biological sample category	Biological sample name	MS/MS sample name	Cluster	Protein name	Protein accession numbers	Database sources	Protein molecular weight (Da)	Protein identification probability	Exclusive unique peptide count	Exclusive unique spectrum count	Total spectrum count	Percentage of total spectra	Percentage sequence coverage
TWrerun01242020 (1)	Uncategorized Sample	7971	GPM22200021131	Cluster of | Neurospora crassa OR74A | Telomere binding protein | protein | length=1092 (NCU00164)	| Neurospora crassa OR74A | Telomere binding protein | protein | length=1092	NCU00164	Neurospora crassa OR74A_rev.fasta	123513	1	154	291	642	0.0314	0.725
TWrerun01242020 (1)	Uncategorized Sample	7971	GPM22200021131	Cluster of | Neurospora crassa OR74A | chromatin remodelling complex ATPase chain ISW1 | protein | length=1126 (NCU03875)	| Neurospora crassa OR74A | chromatin remodelling complex ATPase chain ISW1 | protein | length=1126	NCU03875	Neurospora crassa OR74A_rev.fasta	128534	1	137	314	556	0.0272	0.575
TWrerun01242020 (1)	Uncategorized Sample	7971	GPM22200021131	Cluster of | Neurospora crassa OR74A | SOM1 protein, SOM1 protein, variant 1, SOM1 protein, variant 2, SOM1 protein, variant 3 | protein | length=794 (NCU05791)	| Neurospora crassa OR74A | SOM1 protein, SOM1 protein, variant 1, SOM1 protein, variant 2, SOM1 protein, variant 3 | protein | length=794	NCU05791	Neurospora crassa OR74A_rev.fasta	85741	1	70	189	393	0.0192	0.572
TWrerun01242020 (1)	Uncategorized Sample	7971	GPM22200021131	Cluster of Keratin, type II cytoskeletal 1 OS=Homo sapiens GN=KRT1 PE=1 SV=6 (sp|P04264|K2C1_HUMAN)	Keratin, type II cytoskeletal 1 OS=Homo sapiens GN=KRT1 PE=1 SV=6	sp|P04264|K2C1_HUMAN	Neurospora crassa OR74A_rev.fasta	65888	1	85	143	241	0.0118	0.708
TWrerun01242020 (1)	Uncategorized Sample	7971	GPM22200021131	Cluster of | Neurospora crassa OR74A | hypothetical protein | protein | length=397 (NCU03073)	| Neurospora crassa OR74A | hypothetical protein | protein | length=397	NCU03073	Neurospora crassa OR74A_rev.fasta	41325.2	1	72	116	234	0.0114	0.647
TWrerun01242020 (1)	Uncategorized Sample	7971	GPM22200021131	Cluster of Keratin, type I cytoskeletal 9 OS=Homo sapiens GN=KRT9 PE=1 SV=3 (sp|P35527|K1C9_HUMAN)	Keratin, type I cytoskeletal 9 OS=Homo sapiens GN=KRT9 PE=1 SV=3	sp|P35527|K1C9_HUMAN	Neurospora crassa OR74A_rev.fasta	62131	1	58	92	182	0.0089	0.576
TWrerun01242020 (1)	Uncategorized Sample	7971	GPM22200021131	Cluster of Keratin, type I cytoskeletal 10 OS=Homo sapiens GN=KRT10 PE=1 SV=6 (sp|P13645|K1C10_HUMAN)	Keratin, type I cytoskeletal 10 OS=Homo sapiens GN=KRT10 PE=1 SV=6	sp|P13645|K1C10_HUMAN	Neurospora crassa OR74A_rev.fasta	59520.3	1	45	80	165	0.00807	0.459
TWrerun01242020 (1)	Uncategorized Sample	7971	GPM22200021131	Cluster of | Neurospora crassa OR74A | heat shock protein 70 | protein | length=646 (NCU09602)	| Neurospora crassa OR74A | heat shock protein 70 | protein | length=646	NCU09602	Neurospora crassa OR74A_rev.fasta	70555.4	1	52	106	162	0.00792	0.675
TWrerun01242020 (1)	Uncategorized Sample	7971	GPM22200021131	Cluster of Keratin, type II cytoskeletal 2 epidermal OS=Homo sapiens GN=KRT2 PE=1 SV=2 (sp|P35908|K22E_HUMAN)	Keratin, type II cytoskeletal 2 epidermal OS=Homo sapiens GN=KRT2 PE=1 SV=2	sp|P35908|K22E_HUMAN	Neurospora crassa OR74A_rev.fasta	65866.4	1	53	89	156	0.00763	0.695
TWrerun01242020 (1)	Uncategorized Sample	7971	GPM22200021131	Cluster of | Neurospora crassa OR74A | PTAB | protein | length=794 (NCU01543)	| Neurospora crassa OR74A | PTAB | protein | length=794	NCU01543	Neurospora crassa OR74A_rev.fasta	86690.7	1	26	61	149	0.00729	0.281
TWrerun01242020 (1)	Uncategorized Sample	7971	GPM22200021131	Cluster of | Neurospora crassa OR74A | hypothetical protein | protein | length=1072 (NCU03964)	| Neurospora crassa OR74A | hypothetical protein | protein | length=1072	NCU03964	Neurospora crassa OR74A_rev.fasta	119476	1	46	91	133	0.00651	0.467
TWrerun01242020 (1)	Uncategorized Sample	7971	GPM22200021131	Cluster of Trypsin OS=Sus scrofa PE=1 SV=1 (sp|P00761|TRYP_PIG)	Trypsin OS=Sus scrofa PE=1 SV=1	sp|P00761|TRYP_PIG	Neurospora crassa OR74A_rev.fasta	24409.3	1	29	51	130	0.00636	0.342
TWrerun01242020 (1)	Uncategorized Sample	7971	GPM22200021131	Cluster of Immunoglobulin G-binding protein A OS=Staphylococcus aureus (strain NCTC 8325) GN=spa PE=1 SV=3 (sp|P02976|SPA_STAA8)	Immunoglobulin G-binding protein A OS=Staphylococcus aureus (strain NCTC 8325) GN=spa PE=1 SV=3	sp|P02976|SPA_STAA8	Neurospora crassa OR74A_rev.fasta	56439.4	1	10	16	129	0.00631	0.519
TWrerun01242020 (1)	Uncategorized Sample	7971	GPM22200021131	Cluster of | Neurospora crassa OR74A | Hsp70-like protein | protein | length=668 (NCU08693)	| Neurospora crassa OR74A | Hsp70-like protein | protein | length=668	NCU08693	Neurospora crassa OR74A_rev.fasta	72732.8	1	45	88	128	0.00626	0.599
TWrerun01242020 (1)	Uncategorized Sample	7971	GPM22200021131	Cluster of Immunoglobulin G-binding protein A OS=Staphylococcus aureus (strain NCTC 8325) GN=spa PE=1 SV=3 (sp|P02976|SPA_STAA8)	Immunoglobulin G-binding protein A OS=Staphylococcus aureus GN=spa PE=1 SV=1	sp|P38507|SPA_STAAU	Neurospora crassa OR74A_rev.fasta	55441.4	0.981	0	0	102	0.00499	0.423
TWrerun01242020 (1)	Uncategorized Sample	7971	GPM22200021131	Cluster of | Neurospora crassa OR74A | hypothetical protein, hypothetical protein, variant 1 | protein | length=1530 (NCU00124)	| Neurospora crassa OR74A | hypothetical protein, hypothetical protein, variant 1 | protein | length=1530	NCU00124	Neurospora crassa OR74A_rev.fasta	166943	1	40	67	92	0.0045	0.356
TWrerun01242020 (1)	Uncategorized Sample	7971	GPM22200021131	Cluster of | Neurospora crassa OR74A | hypothetical protein | protein | length=304 (NCU06623)	| Neurospora crassa OR74A | hypothetical protein | protein | length=304	NCU06623	Neurospora crassa OR74A_rev.fasta	31090.8	1	20	37	87	0.00426	0.411
TWrerun01242020 (1)	Uncategorized Sample	7971	GPM22200021131	Cluster of | Neurospora crassa OR74A | hypothetical protein | protein | length=1618 (NCU04073)	| Neurospora crassa OR74A | hypothetical protein | protein | length=1618	NCU04073	Neurospora crassa OR74A_rev.fasta	171137	1	50	70	86	0.00421	0.408
TWrerun01242020 (1)	Uncategorized Sample	7971	GPM22200021131	Cluster of | Neurospora crassa OR74A | Histone H4 | protein | length=103 (NCU00212)	| Neurospora crassa OR74A | Histone H4 | protein | length=103	NCU00212,NCU01634	Neurospora crassa OR74A_rev.fasta	11370.9	1	19	31	82	0.00401	0.505

## Sheet: CRF4-3 >0.4%
Experiment name	Biological sample category	Biological sample name	MS/MS sample name	Cluster	Protein name	Protein accession numbers	Database sources	Protein molecular weight (Da)	Protein identification probability	Exclusive unique peptide count	Exclusive unique spectrum count	Total spectrum count	Percentage of total spectra	Percentage sequence coverage
McNaught072219	Uncategorized Sample	8071	GPM22200020037	Cluster of | Neurospora crassa OR74A | PWWP domain-containing protein | protein | length=640 (NCU02684)	| Neurospora crassa OR74A | PWWP domain-containing protein | protein | length=640	NCU02684	Neurospora crassa OR74A_rev.fasta	69450.8	1	205	395	534	0.057	0.934
McNaught072219	Uncategorized Sample	8071	GPM22200020037	Cluster of Immunoglobulin G-binding protein A OS=Staphylococcus aureus GN=spa PE=1 SV=1 (sp|P38507|SPA_STAAU)	Immunoglobulin G-binding protein A OS=Staphylococcus aureus (strain NCTC 8325) GN=spa PE=1 SV=3	sp|P02976|SPA_STAA8	Neurospora crassa OR74A_rev.fasta	56439.4	1	0	0	171	0.0182	0.609
McNaught072219	Uncategorized Sample	8071	GPM22200020037	Cluster of | Neurospora crassa OR74A | SOM1 protein, SOM1 protein, variant 1, SOM1 protein, variant 2, SOM1 protein, variant 3 | protein | length=794 (NCU05791)	| Neurospora crassa OR74A | SOM1 protein, SOM1 protein, variant 1, SOM1 protein, variant 2, SOM1 protein, variant 3 | protein | length=794	NCU05791	Neurospora crassa OR74A_rev.fasta	85741	1	29	104	154	0.0164	0.455
McNaught072219	Uncategorized Sample	8071	GPM22200020037	Cluster of Immunoglobulin G-binding protein A OS=Staphylococcus aureus GN=spa PE=1 SV=1 (sp|P38507|SPA_STAAU)	Immunoglobulin G-binding protein A OS=Staphylococcus aureus (strain N315) GN=spa PE=1 SV=1	sp|P99134|SPA_STAAN	Neurospora crassa OR74A_rev.fasta	48874.7	1	0	0	154	0.0164	0.558
McNaught072219	Uncategorized Sample	8071	GPM22200020037	Cluster of Immunoglobulin G-binding protein A OS=Staphylococcus aureus GN=spa PE=1 SV=1 (sp|P38507|SPA_STAAU)	Immunoglobulin G-binding protein A OS=Staphylococcus aureus GN=spa PE=1 SV=1	sp|P38507|SPA_STAAU	Neurospora crassa OR74A_rev.fasta	55441.4	1	0	0	138	0.0147	0.516
McNaught072219	Uncategorized Sample	8071	GPM22200020037	Cluster of | Neurospora crassa OR74A | chromatin remodelling complex ATPase chain ISW1 | protein | length=1126 (NCU03875)	| Neurospora crassa OR74A | chromatin remodelling complex ATPase chain ISW1 | protein | length=1126	NCU03875	Neurospora crassa OR74A_rev.fasta	128534	1	64	86	88	0.00939	0.516
McNaught072219	Uncategorized Sample	8071	GPM22200020037	Cluster of | Neurospora crassa OR74A | Histone H4 | protein | length=103 (NCU00212)	| Neurospora crassa OR74A | Histone H4 | protein | length=103	NCU00212,NCU01634	Neurospora crassa OR74A_rev.fasta	11370.9	1	26	44	65	0.00693	0.66
McNaught072219	Uncategorized Sample	8071	GPM22200020037	Cluster of Keratin, type II cytoskeletal 1 OS=Homo sapiens GN=KRT1 PE=1 SV=6 (sp|P04264|K2C1_HUMAN)	Keratin, type II cytoskeletal 1 OS=Homo sapiens GN=KRT1 PE=1 SV=6	sp|P04264|K2C1_HUMAN	Neurospora crassa OR74A_rev.fasta	65888	1	34	49	58	0.00619	0.544
McNaught072219	Uncategorized Sample	8071	GPM22200020037	Cluster of | Neurospora crassa OR74A | 60S ribosomal protein L3 | protein | length=392 (NCU06843)	| Neurospora crassa OR74A | 60S ribosomal protein L3 | protein | length=392	NCU06843	Neurospora crassa OR74A_rev.fasta	44035.4	1	31	53	58	0.00619	0.518
McNaught072219	Uncategorized Sample	8071	GPM22200020037	Cluster of | Neurospora crassa OR74A | Histone H2B | protein | length=137 (NCU02435)	| Neurospora crassa OR74A | Histone H2B | protein | length=137	NCU02435	Neurospora crassa OR74A_rev.fasta	14841.8	1	20	36	56	0.00597	0.752
McNaught072219	Uncategorized Sample	8071	GPM22200020037	Cluster of | Neurospora crassa OR74A | polyadenylate-binding protein | protein | length=764 (NCU04799)	| Neurospora crassa OR74A | polyadenylate-binding protein | protein | length=764	NCU04799	Neurospora crassa OR74A_rev.fasta	82318	1	37	50	52	0.00555	0.475
McNaught072219	Uncategorized Sample	8071	GPM22200020037	Cluster of | Neurospora crassa OR74A | heat shock protein 70 | protein | length=646 (NCU09602)	| Neurospora crassa OR74A | heat shock protein 70 | protein | length=646	NCU09602	Neurospora crassa OR74A_rev.fasta	70555.4	1	34	50	51	0.00544	0.515
McNaught072219	Uncategorized Sample	8071	GPM22200020037	Cluster of | Neurospora crassa OR74A | hypothetical protein | protein | length=663 (NCU00412)	| Neurospora crassa OR74A | hypothetical protein | protein | length=663	NCU00412	Neurospora crassa OR74A_rev.fasta	73743.1	1	33	43	48	0.00512	0.452
McNaught072219	Uncategorized Sample	8071	GPM22200020037	Cluster of | Neurospora crassa OR74A | Grp1p | protein | length=354 (NCU07735)	| Neurospora crassa OR74A | Grp1p | protein | length=354	NCU07735	Neurospora crassa OR74A_rev.fasta	37861.7	1	23	37	41	0.00437	0.78
McNaught072219	Uncategorized Sample	8071	GPM22200020037	Cluster of | Neurospora crassa OR74A | 60S ribosomal protein L2 | protein | length=254 (NCU00413)	| Neurospora crassa OR74A | 60S ribosomal protein L2 | protein | length=254	NCU00413	Neurospora crassa OR74A_rev.fasta	27356.6	1	21	37	39	0.00416	0.709
McNaught072219	Uncategorized Sample	8071	GPM22200020037	Cluster of | Neurospora crassa OR74A | 40S ribosomal protein S6, 40S ribosomal protein S6, variant 1, 40S ribosomal protein S6, variant 2 | protein | length=239 (NCU08502)	| Neurospora crassa OR74A | 40S ribosomal protein S6, 40S ribosomal protein S6, variant 1, 40S ribosomal protein S6, variant 2 | protein | length=239	NCU08502	Neurospora crassa OR74A_rev.fasta	27331.8	1	24	37	39	0.00416	0.636
McNaught072219	Uncategorized Sample	8071	GPM22200020037	Cluster of Keratin, type I cytoskeletal 10 OS=Homo sapiens GN=KRT10 PE=1 SV=6 (sp|P13645|K1C10_HUMAN)	Keratin, type I cytoskeletal 10 OS=Homo sapiens GN=KRT10 PE=1 SV=6	sp|P13645|K1C10_HUMAN	Neurospora crassa OR74A_rev.fasta	59520.3	1	21	30	39	0.00416	0.395
McNaught072219	Uncategorized Sample	8071	GPM22200020037	Cluster of | Neurospora crassa OR74A | 60S ribosomal protein L4-A | protein | length=361 (NCU03757)	| Neurospora crassa OR74A | 60S ribosomal protein L4-A | protein | length=361	NCU03757	Neurospora crassa OR74A_rev.fasta	38814.2	1	27	34	37	0.00395	0.681

## Sheet: new NCU00412 >0.4%
Experiment name	Biological sample category	Biological sample name	MS/MS sample name	Cluster	Protein name	Protein accession numbers	Database sources	Protein molecular weight (Da)	Protein identification probability	Exclusive unique peptide count	Exclusive unique spectrum count	Total spectrum count	Percentage of total spectra	Percentage sequence coverage
TWrerun01242020 (1)	Uncategorized Sample	7973	GPM22200021130	Cluster of | Neurospora crassa OR74A | chromatin remodelling complex ATPase chain ISW1 | protein | length=1126 (NCU03875)	| Neurospora crassa OR74A | chromatin remodelling complex ATPase chain ISW1 | protein | length=1126	NCU03875	Neurospora crassa OR74A_rev.fasta	128534	1	177	358	570	0.0348	0.723
TWrerun01242020 (1)	Uncategorized Sample	7973	GPM22200021130	Cluster of | Neurospora crassa OR74A | SOM1 protein, SOM1 protein, variant 1, SOM1 protein, variant 2, SOM1 protein, variant 3 | protein | length=794 (NCU05791)	| Neurospora crassa OR74A | SOM1 protein, SOM1 protein, variant 1, SOM1 protein, variant 2, SOM1 protein, variant 3 | protein | length=794	NCU05791	Neurospora crassa OR74A_rev.fasta	85741	1	87	244	521	0.0318	0.646
TWrerun01242020 (1)	Uncategorized Sample	7973	GPM22200021130	Cluster of | Neurospora crassa OR74A | hypothetical protein | protein | length=663 (NCU00412)	| Neurospora crassa OR74A | hypothetical protein | protein | length=663	NCU00412	Neurospora crassa OR74A_rev.fasta	73743.1	1	130	254	466	0.0285	0.713
TWrerun01242020 (1)	Uncategorized Sample	7973	GPM22200021130	Cluster of Keratin, type II cytoskeletal 1 OS=Homo sapiens GN=KRT1 PE=1 SV=6 (sp|P04264|K2C1_HUMAN)	Keratin, type II cytoskeletal 1 OS=Homo sapiens GN=KRT1 PE=1 SV=6	sp|P04264|K2C1_HUMAN	Neurospora crassa OR74A_rev.fasta	65888	1	76	135	219	0.0134	0.669
TWrerun01242020 (1)	Uncategorized Sample	7973	GPM22200021130	Cluster of | Neurospora crassa OR74A | PTAB | protein | length=794 (NCU01543)	| Neurospora crassa OR74A | PTAB | protein | length=794	NCU01543	Neurospora crassa OR74A_rev.fasta	86690.7	1	48	91	216	0.0132	0.335
TWrerun01242020 (1)	Uncategorized Sample	7973	GPM22200021130	Cluster of Keratin, type I cytoskeletal 9 OS=Homo sapiens GN=KRT9 PE=1 SV=3 (sp|P35527|K1C9_HUMAN)	Keratin, type I cytoskeletal 9 OS=Homo sapiens GN=KRT9 PE=1 SV=3	sp|P35527|K1C9_HUMAN	Neurospora crassa OR74A_rev.fasta	62131	1	60	97	169	0.0103	0.613
TWrerun01242020 (1)	Uncategorized Sample	7973	GPM22200021130	Cluster of | Neurospora crassa OR74A | heat shock protein 70 | protein | length=646 (NCU09602)	| Neurospora crassa OR74A | heat shock protein 70 | protein | length=646	NCU09602	Neurospora crassa OR74A_rev.fasta	70555.4	1	53	121	163	0.00996	0.68
TWrerun01242020 (1)	Uncategorized Sample	7973	GPM22200021130	Cluster of Keratin, type I cytoskeletal 10 OS=Homo sapiens GN=KRT10 PE=1 SV=6 (sp|P13645|K1C10_HUMAN)	Keratin, type I cytoskeletal 10 OS=Homo sapiens GN=KRT10 PE=1 SV=6	sp|P13645|K1C10_HUMAN	Neurospora crassa OR74A_rev.fasta	59520.3	1	40	80	154	0.00941	0.528
TWrerun01242020 (1)	Uncategorized Sample	7973	GPM22200021130	Cluster of Trypsin OS=Sus scrofa PE=1 SV=1 (sp|P00761|TRYP_PIG)	Trypsin OS=Sus scrofa PE=1 SV=1	sp|P00761|TRYP_PIG	Neurospora crassa OR74A_rev.fasta	24409.3	1	39	62	124	0.00758	0.571
TWrerun01242020 (1)	Uncategorized Sample	7973	GPM22200021130	Cluster of Keratin, type II cytoskeletal 2 epidermal OS=Homo sapiens GN=KRT2 PE=1 SV=2 (sp|P35908|K22E_HUMAN)	Keratin, type II cytoskeletal 2 epidermal OS=Homo sapiens GN=KRT2 PE=1 SV=2	sp|P35908|K22E_HUMAN	Neurospora crassa OR74A_rev.fasta	65866.4	1	47	75	120	0.00733	0.699
TWrerun01242020 (1)	Uncategorized Sample	7973	GPM22200021130	Cluster of | Neurospora crassa OR74A | hypothetical protein | protein | length=1072 (NCU03964)	| Neurospora crassa OR74A | hypothetical protein | protein | length=1072	NCU03964	Neurospora crassa OR74A_rev.fasta	119476	1	49	89	116	0.00709	0.503
TWrerun01242020 (1)	Uncategorized Sample	7973	GPM22200021130	Cluster of | Neurospora crassa OR74A | Hsp70-like protein | protein | length=668 (NCU08693)	| Neurospora crassa OR74A | Hsp70-like protein | protein | length=668	NCU08693	Neurospora crassa OR74A_rev.fasta	72732.8	1	47	87	112	0.00684	0.614
TWrerun01242020 (1)	Uncategorized Sample	7973	GPM22200021130	Cluster of | Neurospora crassa OR74A | hypothetical protein, hypothetical protein, variant 1 | protein | length=1530 (NCU00124)	| Neurospora crassa OR74A | hypothetical protein, hypothetical protein, variant 1 | protein | length=1530	NCU00124	Neurospora crassa OR74A_rev.fasta	166943	1	43	73	98	0.00599	0.401
TWrerun01242020 (1)	Uncategorized Sample	7973	GPM22200021130	Cluster of | Neurospora crassa OR74A | hypothetical protein | protein | length=1618 (NCU04073)	| Neurospora crassa OR74A | hypothetical protein | protein | length=1618	NCU04073	Neurospora crassa OR74A_rev.fasta	171137	1	57	77	90	0.0055	0.449
TWrerun01242020 (1)	Uncategorized Sample	7973	GPM22200021130	Cluster of Immunoglobulin G-binding protein A OS=Staphylococcus aureus (strain NCTC 8325) GN=spa PE=1 SV=3 (sp|P02976|SPA_STAA8)	Immunoglobulin G-binding protein A OS=Staphylococcus aureus (strain NCTC 8325) GN=spa PE=1 SV=3	sp|P02976|SPA_STAA8	Neurospora crassa OR74A_rev.fasta	56439.4	1	9	15	84	0.00513	0.504
TWrerun01242020 (1)	Uncategorized Sample	7973	GPM22200021130	Cluster of | Neurospora crassa OR74A | beta-taxilin, beta-taxilin, variant 1 | protein | length=384 (NCU01273)	| Neurospora crassa OR74A | beta-taxilin, beta-taxilin, variant 1 | protein | length=384	NCU01273	Neurospora crassa OR74A_rev.fasta	45361.4	1	22	49	67	0.00409	0.391
TWrerun01242020 (1)	Uncategorized Sample	7973	GPM22200021130	Cluster of | Neurospora crassa OR74A | hypothetical protein | protein | length=1274 (NCU09112)	| Neurospora crassa OR74A | hypothetical protein | protein | length=1274	NCU09112	Neurospora crassa OR74A_rev.fasta	142414	1	39	60	65	0.00397	0.421

## Sheet: NCU09388 >0.4%
Experiment name	Biological sample category	Biological sample name	MS/MS sample name	Cluster	Protein name	Protein accession numbers	Database sources	Protein molecular weight (Da)	Protein identification probability	Exclusive unique peptide count	Exclusive unique spectrum count	Total spectrum count	Percentage of total spectra	Percentage sequence coverage
McNaught072219	Uncategorized Sample	8075	GPM22200020038	Cluster of Immunoglobulin G-binding protein A OS=Staphylococcus aureus GN=spa PE=1 SV=1 (sp|P38507|SPA_STAAU)	Immunoglobulin G-binding protein A OS=Staphylococcus aureus (strain NCTC 8325) GN=spa PE=1 SV=3	sp|P02976|SPA_STAA8	Neurospora crassa OR74A_rev.fasta	56439.4	1	0	0	427	0.0415	0.657
McNaught072219	Uncategorized Sample	8075	GPM22200020038	Cluster of Immunoglobulin G-binding protein A OS=Staphylococcus aureus GN=spa PE=1 SV=1 (sp|P38507|SPA_STAAU)	Immunoglobulin G-binding protein A OS=Staphylococcus aureus (strain N315) GN=spa PE=1 SV=1	sp|P99134|SPA_STAAN	Neurospora crassa OR74A_rev.fasta	48874.7	1	0	0	375	0.0365	0.613
McNaught072219	Uncategorized Sample	8075	GPM22200020038	Cluster of Immunoglobulin G-binding protein A OS=Staphylococcus aureus GN=spa PE=1 SV=1 (sp|P38507|SPA_STAAU)	Immunoglobulin G-binding protein A OS=Staphylococcus aureus GN=spa PE=1 SV=1	sp|P38507|SPA_STAAU	Neurospora crassa OR74A_rev.fasta	55441.4	1	0	0	333	0.0324	0.594
McNaught072219	Uncategorized Sample	8075	GPM22200020038	Cluster of | Neurospora crassa OR74A | chromatin remodelling complex ATPase chain ISW1 | protein | length=1126 (NCU03875)	| Neurospora crassa OR74A | chromatin remodelling complex ATPase chain ISW1 | protein | length=1126	NCU03875	Neurospora crassa OR74A_rev.fasta	128534	1	120	212	267	0.026	0.667
McNaught072219	Uncategorized Sample	8075	GPM22200020038	Cluster of | Neurospora crassa OR74A | hypothetical protein | protein | length=789 (NCU09388)	| Neurospora crassa OR74A | hypothetical protein | protein | length=789	NCU09388	Neurospora crassa OR74A_rev.fasta	87866.1	1	101	178	263	0.0256	0.74
McNaught072219	Uncategorized Sample	8075	GPM22200020038	Cluster of | Neurospora crassa OR74A | SOM1 protein, SOM1 protein, variant 1, SOM1 protein, variant 2, SOM1 protein, variant 3 | protein | length=794 (NCU05791)	| Neurospora crassa OR74A | SOM1 protein, SOM1 protein, variant 1, SOM1 protein, variant 2, SOM1 protein, variant 3 | protein | length=794	NCU05791	Neurospora crassa OR74A_rev.fasta	85741	1	43	112	171	0.0166	0.432
McNaught072219	Uncategorized Sample	8075	GPM22200020038	Cluster of Keratin, type II cytoskeletal 1 OS=Homo sapiens GN=KRT1 PE=1 SV=6 (sp|P04264|K2C1_HUMAN)	Keratin, type II cytoskeletal 1 OS=Homo sapiens GN=KRT1 PE=1 SV=6	sp|P04264|K2C1_HUMAN	Neurospora crassa OR74A_rev.fasta	65888	1	43	66	78	0.00759	0.558
McNaught072219	Uncategorized Sample	8075	GPM22200020038	Cluster of | Neurospora crassa OR74A | heat shock protein 70 | protein | length=646 (NCU09602)	| Neurospora crassa OR74A | heat shock protein 70 | protein | length=646	NCU09602	Neurospora crassa OR74A_rev.fasta	70555.4	1	40	71	76	0.00739	0.546
McNaught072219	Uncategorized Sample	8075	GPM22200020038	Cluster of | Neurospora crassa OR74A | PTAB | protein | length=794 (NCU01543)	| Neurospora crassa OR74A | PTAB | protein | length=794	NCU01543	Neurospora crassa OR74A_rev.fasta	86690.7	1	21	43	60	0.00584	0.272
McNaught072219	Uncategorized Sample	8075	GPM22200020038	Cluster of Keratin, type II cytoskeletal 2 epidermal OS=Homo sapiens GN=KRT2 PE=1 SV=2 (sp|P35908|K22E_HUMAN)	Keratin, type II cytoskeletal 2 epidermal OS=Homo sapiens GN=KRT2 PE=1 SV=2	sp|P35908|K22E_HUMAN	Neurospora crassa OR74A_rev.fasta	65866.4	1	40	47	57	0.00554	0.688
McNaught072219	Uncategorized Sample	8075	GPM22200020038	Cluster of | Neurospora crassa OR74A | Histone H4 | protein | length=103 (NCU00212)	| Neurospora crassa OR74A | Histone H4 | protein | length=103	NCU00212,NCU01634	Neurospora crassa OR74A_rev.fasta	11370.9	1	19	34	57	0.00554	0.553
McNaught072219	Uncategorized Sample	8075	GPM22200020038	Cluster of Keratin, type I cytoskeletal 10 OS=Homo sapiens GN=KRT10 PE=1 SV=6 (sp|P13645|K1C10_HUMAN)	Keratin, type I cytoskeletal 10 OS=Homo sapiens GN=KRT10 PE=1 SV=6	sp|P13645|K1C10_HUMAN	Neurospora crassa OR74A_rev.fasta	59520.3	1	27	38	49	0.00477	0.455
McNaught072219	Uncategorized Sample	8075	GPM22200020038	Cluster of | Neurospora crassa OR74A | Histone H2B | protein | length=137 (NCU02435)	| Neurospora crassa OR74A | Histone H2B | protein | length=137	NCU02435	Neurospora crassa OR74A_rev.fasta	14841.8	1	14	32	48	0.00467	0.693
McNaught072219	Uncategorized Sample	8075	GPM22200020038	Cluster of Keratin, type I cytoskeletal 9 OS=Homo sapiens GN=KRT9 PE=1 SV=3 (sp|P35527|K1C9_HUMAN)	Keratin, type I cytoskeletal 9 OS=Homo sapiens GN=KRT9 PE=1 SV=3	sp|P35527|K1C9_HUMAN	Neurospora crassa OR74A_rev.fasta	62131	1	31	43	48	0.00467	0.526
McNaught072219	Uncategorized Sample	8075	GPM22200020038	Cluster of | Neurospora crassa OR74A | Hsp70-like protein | protein | length=668 (NCU08693)	| Neurospora crassa OR74A | Hsp70-like protein | protein | length=668	NCU08693	Neurospora crassa OR74A_rev.fasta	72732.8	1	32	45	45	0.00438	0.506
