# Supplementary material for: The ACF chromatin-remodeling complex is essential for Polycomb repression
Source: eLife. 2022 Mar 8;11:e77595. doi: 10.7554/eLife.77595 (PMC9038196; doi:10.7554/eLife.77595)
Supplement: Figure 2—source data 2. [file elife-77595-fig2-data2.xlsx]

## Sheet: CRF4-1_Protein Report
Experiment name	Biological sample category	Biological sample name	MS/MS sample name	Cluster	Protein name	Protein accession numbers	Database sources	Protein molecular weight (Da)	Protein identification probability	Exclusive unique peptide count	Exclusive unique spectrum count	Total spectrum count	Percentage of total spectra	Percentage sequence coverage
Vince Research01272020	Uncategorized Sample	Vince	GPM22200021135	Cluster of | Neurospora crassa OR74A | embden-meyerhof pathway-16 | protein | length=748 (NCU01728)	| Neurospora crassa OR74A | embden-meyerhof pathway-16 | protein | length=748	NCU01728	Neurospora crassa OR74A_rev.fasta	84417.7	1	204	335	486	0.0229	0.826
Vince Research01272020	Uncategorized Sample	Vince	GPM22200021135	Cluster of | Neurospora crassa OR74A | chromatin remodelling complex ATPase chain ISW1 | protein | length=1126 (NCU03875)	| Neurospora crassa OR74A | chromatin remodelling complex ATPase chain ISW1 | protein | length=1126	NCU03875	Neurospora crassa OR74A_rev.fasta	128534	1	326	581	1287	0.0607	0.761
Vince Research01272020	Uncategorized Sample	Vince	GPM22200021135	Cluster of | Neurospora crassa OR74A | cytoplasmic ribosomal protein 10 | protein | length=262 (NCU00489)	| Neurospora crassa OR74A | cytoplasmic ribosomal protein 10 | protein | length=262	NCU00489	Neurospora crassa OR74A_rev.fasta	28666.6	1	22	29	29	0.0014	0.733
Vince Research01272020	Uncategorized Sample	Vince	GPM22200021135	Cluster of | Neurospora crassa OR74A | 60S ribosomal protein L9 | protein | length=193 (NCU02744)	| Neurospora crassa OR74A | 60S ribosomal protein L9 | protein | length=193	NCU02744	Neurospora crassa OR74A_rev.fasta	21752	1	17	26	27	0.0013	0.731
Vince Research01272020	Uncategorized Sample	Vince	GPM22200021135	Cluster of | Neurospora crassa OR74A | 60S acidic ribosomal protein P2 | protein | length=110 (NCU00979)	| Neurospora crassa OR74A | 60S acidic ribosomal protein P2 | protein | length=110	NCU00979	Neurospora crassa OR74A_rev.fasta	11102.8	1	8	9	10	0.0005	0.718
Vince Research01272020	Uncategorized Sample	Vince	GPM22200021135	Cluster of | Neurospora crassa OR74A | 40S ribosomal protein S12 | protein | length=147 (NCU06432)	| Neurospora crassa OR74A | 40S ribosomal protein S12 | protein | length=147	NCU06432	Neurospora crassa OR74A_rev.fasta	16229.3	1	11	20	20	0.0009	0.707
Vince Research01272020	Uncategorized Sample	Vince	GPM22200021135	Cluster of | Neurospora crassa OR74A | 60S ribosomal protein L4-A | protein | length=361 (NCU03757)	| Neurospora crassa OR74A | 60S ribosomal protein L4-A | protein | length=361	NCU03757	Neurospora crassa OR74A_rev.fasta	38814.2	1	49	79	97	0.0046	0.679
Vince Research01272020	Uncategorized Sample	Vince	GPM22200021135	Cluster of | Neurospora crassa OR74A | Ras superfamily GTPase | protein | length=189 (NCU11181)	| Neurospora crassa OR74A | Ras superfamily GTPase | protein | length=189	NCU11181	Neurospora crassa OR74A_rev.fasta	21583.5	1	12	15	15	0.0007	0.672
Vince Research01272020	Uncategorized Sample	Vince	GPM22200021135	Cluster of | Neurospora crassa OR74A | Grp1p | protein | length=354 (NCU07735)	| Neurospora crassa OR74A | Grp1p | protein | length=354	NCU07735	Neurospora crassa OR74A_rev.fasta	37861.7	1	19	31	33	0.0016	0.667
Vince Research01272020	Uncategorized Sample	Vince	GPM22200021135	Cluster of | Neurospora crassa OR74A | hypothetical protein | protein | length=789 (NCU09388)	| Neurospora crassa OR74A | hypothetical protein | protein | length=789	NCU09388	Neurospora crassa OR74A_rev.fasta	87866.1	1	83	142	169	0.008	0.665
Vince Research01272020	Uncategorized Sample	Vince	GPM22200021135	Cluster of | Neurospora crassa OR74A | 40S ribosomal protein S29 | protein | length=56 (NCU03738)	| Neurospora crassa OR74A | 40S ribosomal protein S29 | protein | length=56	NCU03738	Neurospora crassa OR74A_rev.fasta	6500.5	1	5	5	5	0.0002	0.661
Vince Research01272020	Uncategorized Sample	Vince	GPM22200021135	Cluster of | Neurospora crassa OR74A | zinc knuckle domain-containing protein, zinc knuckle domain-containing protein, variant 1 | protein | length=225 (NCU05800)	| Neurospora crassa OR74A | zinc knuckle domain-containing protein, zinc knuckle domain-containing protein, variant 1 | protein | length=225	NCU05800	Neurospora crassa OR74A_rev.fasta	23467.7	1	10	22	23	0.0011	0.649
Vince Research01272020	Uncategorized Sample	Vince	GPM22200021135	Cluster of | Neurospora crassa OR74A | activator 1 subunit 3 | protein | length=389 (NCU08427)	| Neurospora crassa OR74A | activator 1 subunit 3 | protein | length=389	NCU08427	Neurospora crassa OR74A_rev.fasta	42461.5	1	19	22	22	0.001	0.632
Vince Research01272020	Uncategorized Sample	Vince	GPM22200021135	Cluster of | Neurospora crassa OR74A | ribosomal protein CRP7, ribosomal protein CRP7, variant 1 | protein | length=87 (NCU08627)	| Neurospora crassa OR74A | ribosomal protein CRP7, ribosomal protein CRP7, variant 1 | protein | length=87	NCU08627	Neurospora crassa OR74A_rev.fasta	9661.2	1	5	13	14	0.0007	0.632
Vince Research01272020	Uncategorized Sample	Vince	GPM22200021135	Cluster of | Neurospora crassa OR74A | actin, actin, variant 1 | protein | length=375 (NCU04173)	| Neurospora crassa OR74A | actin, actin, variant 1 | protein | length=375	NCU04173	Neurospora crassa OR74A_rev.fasta	41608.1	1	22	43	51	0.0024	0.629
Vince Research01272020	Uncategorized Sample	Vince	GPM22200021135	Cluster of | Neurospora crassa OR74A | hypothetical protein | protein | length=663 (NCU00412)	| Neurospora crassa OR74A | hypothetical protein | protein | length=663	NCU00412	Neurospora crassa OR74A_rev.fasta	73743.1	1	80	153	196	0.0093	0.624
Vince Research01272020	Uncategorized Sample	Vince	GPM22200021135	Cluster of | Neurospora crassa OR74A | 14-3-3 family protein 7 | protein | length=262 (NCU02806)	| Neurospora crassa OR74A | 14-3-3 family protein 7 | protein | length=262	NCU02806	Neurospora crassa OR74A_rev.fasta	29329.6	1	10	11	13	0.0006	0.622
Vince Research01272020	Uncategorized Sample	Vince	GPM22200021135	Cluster of | Neurospora crassa OR74A | 40S ribosomal protein S1 | protein | length=256 (NCU01452)	| Neurospora crassa OR74A | 40S ribosomal protein S1 | protein | length=256	NCU01452	Neurospora crassa OR74A_rev.fasta	29070	1	25	36	41	0.0019	0.605
Vince Research01272020	Uncategorized Sample	Vince	GPM22200021135	Cluster of | Neurospora crassa OR74A | PWWP domain-containing protein | protein | length=640 (NCU02684)	| Neurospora crassa OR74A | PWWP domain-containing protein | protein | length=640	NCU02684	Neurospora crassa OR74A_rev.fasta	69450.8	1	52	104	114	0.0054	0.603
Vince Research01272020	Uncategorized Sample	Vince	GPM22200021135	Cluster of | Neurospora crassa OR74A | heat shock protein 70 | protein | length=646 (NCU09602)	| Neurospora crassa OR74A | heat shock protein 70 | protein | length=646	NCU09602	Neurospora crassa OR74A_rev.fasta	70555.4	1	47	87	109	0.0051	0.601
Vince Research01272020	Uncategorized Sample	Vince	GPM22200021135	Cluster of | Neurospora crassa OR74A | woronin body major protein | protein | length=176 (NCU08332)	| Neurospora crassa OR74A | woronin body major protein | protein | length=176	NCU08332	Neurospora crassa OR74A_rev.fasta	19126	1	8	8	8	0.0004	0.597
Vince Research01272020	Uncategorized Sample	Vince	GPM22200021135	Cluster of | Neurospora crassa OR74A | hypothetical protein | protein | length=109 (NCU08960)	| Neurospora crassa OR74A | hypothetical protein | protein | length=109	NCU08960	Neurospora crassa OR74A_rev.fasta	11043.8	1	9	13	15	0.0007	0.596
Vince Research01272020	Uncategorized Sample	Vince	GPM22200021135	Cluster of | Neurospora crassa OR74A | 60S ribosomal protein L3 | protein | length=392 (NCU06843)	| Neurospora crassa OR74A | 60S ribosomal protein L3 | protein | length=392	NCU06843	Neurospora crassa OR74A_rev.fasta	44035.4	1	48	73	83	0.0039	0.589
Vince Research01272020	Uncategorized Sample	Vince	GPM22200021135	Cluster of | Neurospora crassa OR74A | 60S ribosomal protein L30 | protein | length=109 (NCU08963)	| Neurospora crassa OR74A | 60S ribosomal protein L30 | protein | length=109	NCU08963	Neurospora crassa OR74A_rev.fasta	11703.5	1	11	23	27	0.0013	0.587
Vince Research01272020	Uncategorized Sample	Vince	GPM22200021135	Cluster of | Neurospora crassa OR74A | activator 1 41 kDa subunit | protein | length=387 (NCU02687)	| Neurospora crassa OR74A | activator 1 41 kDa subunit | protein | length=387	NCU02687	Neurospora crassa OR74A_rev.fasta	42730	1	21	23	23	0.0011	0.587
Vince Research01272020	Uncategorized Sample	Vince	GPM22200021135	Cluster of | Neurospora crassa OR74A | Histone H2B | protein | length=137 (NCU02435)	| Neurospora crassa OR74A | Histone H2B | protein | length=137	NCU02435	Neurospora crassa OR74A_rev.fasta	14841.8	1	15	27	41	0.0019	0.584
Vince Research01272020	Uncategorized Sample	Vince	GPM22200021135	Cluster of | Neurospora crassa OR74A | 60S ribosomal protein L12 | protein | length=165 (NCU01317)	| Neurospora crassa OR74A | 60S ribosomal protein L12 | protein | length=165	NCU01317	Neurospora crassa OR74A_rev.fasta	17693.6	1	11	15	19	0.0009	0.582
Vince Research01272020	Uncategorized Sample	Vince	GPM22200021135	Cluster of | Neurospora crassa OR74A | 40S ribosomal protein S14 | protein | length=150 (NCU07830)	| Neurospora crassa OR74A | 40S ribosomal protein S14 | protein | length=150	NCU07830	Neurospora crassa OR74A_rev.fasta	15997.9	1	17	26	28	0.0013	0.58
Vince Research01272020	Uncategorized Sample	Vince	GPM22200021135	Cluster of | Neurospora crassa OR74A | Glu/Leu/Phe/Val dehydrogenase | protein | length=454 (NCU01195)	| Neurospora crassa OR74A | Glu/Leu/Phe/Val dehydrogenase | protein | length=454	NCU01195	Neurospora crassa OR74A_rev.fasta	48853.6	1	19	21	21	0.001	0.579
Vince Research01272020	Uncategorized Sample	Vince	GPM22200021135	Cluster of Keratin, type II cytoskeletal 1 OS=Homo sapiens GN=KRT1 PE=1 SV=6 (sp|P04264|K2C1_HUMAN)	Keratin, type II cytoskeletal 1 OS=Homo sapiens GN=KRT1 PE=1 SV=6	sp|P04264|K2C1_HUMAN	Neurospora crassa OR74A_rev.fasta	65888	1	32	46	54	0.0026	0.571
Vince Research01272020	Uncategorized Sample	Vince	GPM22200021135	Cluster of | Neurospora crassa OR74A | glyceraldehyde 3-phosphate-dehydrogenase | protein | length=338 (NCU01528)	| Neurospora crassa OR74A | glyceraldehyde 3-phosphate-dehydrogenase | protein | length=338	NCU01528	Neurospora crassa OR74A_rev.fasta	36292.6	1	15	18	20	0.0009	0.571
Vince Research01272020	Uncategorized Sample	Vince	GPM22200021135	Cluster of | Neurospora crassa OR74A | 40S ribosomal protein S17 | protein | length=146 (NCU07014)	| Neurospora crassa OR74A | 40S ribosomal protein S17 | protein | length=146	NCU07014	Neurospora crassa OR74A_rev.fasta	16943	1	8	10	10	0.0005	0.562
Vince Research01272020	Uncategorized Sample	Vince	GPM22200021135	Cluster of | Neurospora crassa OR74A | 40S ribosomal protein S11 | protein | length=161 (NCU03102)	| Neurospora crassa OR74A | 40S ribosomal protein S11 | protein | length=161	NCU03102	Neurospora crassa OR74A_rev.fasta	18428.9	1	16	26	28	0.0013	0.559
Vince Research01272020	Uncategorized Sample	Vince	GPM22200021135	Cluster of | Neurospora crassa OR74A | RuvB-like helicase 1 | protein | length=458 (NCU03482)	| Neurospora crassa OR74A | RuvB-like helicase 1 | protein | length=458	NCU03482	Neurospora crassa OR74A_rev.fasta	49812.3	1	21	24	25	0.0012	0.557
Vince Research01272020	Uncategorized Sample	Vince	GPM22200021135	Cluster of | Neurospora crassa OR74A | RNP domain-containing protein, RNP domain-containing protein, variant 1, RNP domain-containing protein, variant 2, RNP domain-containing protein, variant 3 | protein | length=483 (NCU02404)	| Neurospora crassa OR74A | RNP domain-containing protein, RNP domain-containing protein, variant 1, RNP domain-containing protein, variant 2, RNP domain-containing protein, variant 3 | protein | length=483	NCU02404	Neurospora crassa OR74A_rev.fasta	51538.3	1	18	22	22	0.001	0.557
Vince Research01272020	Uncategorized Sample	Vince	GPM22200021135	Cluster of | Neurospora crassa OR74A | 40S ribosomal protein S5 | protein | length=213 (NCU09475)	| Neurospora crassa OR74A | 40S ribosomal protein S5 | protein | length=213	NCU09475	Neurospora crassa OR74A_rev.fasta	23680.4	1	14	20	20	0.0009	0.549
Vince Research01272020	Uncategorized Sample	Vince	GPM22200021135	Cluster of | Neurospora crassa OR74A | Histone H4 | protein | length=103 (NCU00212)	| Neurospora crassa OR74A | Histone H4 | protein | length=103	NCU00212,NCU01634	Neurospora crassa OR74A_rev.fasta	11370.9	1	21	32	53	0.0025	0.544
Vince Research01272020	Uncategorized Sample	Vince	GPM22200021135	Cluster of | Neurospora crassa OR74A | 60S ribosomal protein L43 | protein | length=92 (NCU07562)	| Neurospora crassa OR74A | 60S ribosomal protein L43 | protein | length=92	NCU07562	Neurospora crassa OR74A_rev.fasta	10133	1	7	9	11	0.0005	0.543
Vince Research01272020	Uncategorized Sample	Vince	GPM22200021135	Cluster of | Neurospora crassa OR74A | 60S ribosomal protein L13 | protein | length=214 (NCU05554)	| Neurospora crassa OR74A | 60S ribosomal protein L13 | protein | length=214	NCU05554	Neurospora crassa OR74A_rev.fasta	23877.5	1	22	36	42	0.002	0.542
Vince Research01272020	Uncategorized Sample	Vince	GPM22200021135	Cluster of | Neurospora crassa OR74A | alpha-tubulin | protein | length=449 (NCU09468)	| Neurospora crassa OR74A | alpha-tubulin | protein | length=449	NCU09468	Neurospora crassa OR74A_rev.fasta	49966.1	1	22	32	35	0.0017	0.541
Vince Research01272020	Uncategorized Sample	Vince	GPM22200021135	Cluster of | Neurospora crassa OR74A | activator 1 38 kDa subunit | protein | length=352 (NCU06769)	| Neurospora crassa OR74A | activator 1 38 kDa subunit | protein | length=352	NCU06769	Neurospora crassa OR74A_rev.fasta	39922	1	17	22	22	0.001	0.537
Vince Research01272020	Uncategorized Sample	Vince	GPM22200021135	Cluster of | Neurospora crassa OR74A | 60S ribosomal protein L23 | protein | length=139 (NCU02905)	| Neurospora crassa OR74A | 60S ribosomal protein L23 | protein | length=139	NCU02905	Neurospora crassa OR74A_rev.fasta	14699.6	1	11	22	28	0.0013	0.532
Vince Research01272020	Uncategorized Sample	Vince	GPM22200021135	Cluster of | Neurospora crassa OR74A | ribosomal protein L27a.e | protein | length=149 (NCU03806)	| Neurospora crassa OR74A | ribosomal protein L27a.e | protein | length=149	NCU03806	Neurospora crassa OR74A_rev.fasta	16597.2	1	15	24	29	0.0014	0.53
Vince Research01272020	Uncategorized Sample	Vince	GPM22200021135	Cluster of | Neurospora crassa OR74A | isocitrate dehydrogenase subunit 1 | protein | length=385 (NCU00775)	| Neurospora crassa OR74A | isocitrate dehydrogenase subunit 1 | protein | length=385	NCU00775	Neurospora crassa OR74A_rev.fasta	42078.6	1	18	25	25	0.0012	0.53
Vince Research01272020	Uncategorized Sample	Vince	GPM22200021135	Cluster of | Neurospora crassa OR74A | Ribosomal protein L26 | protein | length=136 (NCU03565)	| Neurospora crassa OR74A | Ribosomal protein L26 | protein | length=136	NCU03565	Neurospora crassa OR74A_rev.fasta	15331	1	16	25	30	0.0014	0.529
Vince Research01272020	Uncategorized Sample	Vince	GPM22200021135	Cluster of | Neurospora crassa OR74A | glucose-regulated protein | protein | length=661 (NCU03982)	| Neurospora crassa OR74A | glucose-regulated protein | protein | length=661	NCU03982	Neurospora crassa OR74A_rev.fasta	72333.2	1	47	92	107	0.0051	0.528
Vince Research01272020	Uncategorized Sample	Vince	GPM22200021135	Cluster of | Neurospora crassa OR74A | hypothetical protein | protein | length=150 (NCU06210)	| Neurospora crassa OR74A | hypothetical protein | protein | length=150	NCU06210	Neurospora crassa OR74A_rev.fasta	15979.6	1	13	19	24	0.0011	0.527
Vince Research01272020	Uncategorized Sample	Vince	GPM22200021135	Cluster of | Neurospora crassa OR74A | hypothetical protein | protein | length=397 (NCU03073)	| Neurospora crassa OR74A | hypothetical protein | protein | length=397	NCU03073	Neurospora crassa OR74A_rev.fasta	41325.2	1	21	31	32	0.0015	0.526
Vince Research01272020	Uncategorized Sample	Vince	GPM22200021135	Cluster of | Neurospora crassa OR74A | zinc knuckle domain-containing protein | protein | length=183 (NCU08923)	| Neurospora crassa OR74A | zinc knuckle domain-containing protein | protein | length=183	NCU08923	Neurospora crassa OR74A_rev.fasta	19038	1	7	9	9	0.0004	0.525
Vince Research01272020	Uncategorized Sample	Vince	GPM22200021135	Cluster of | Neurospora crassa OR74A | phosphatidylinositol-4-phosphate 5-kinase its3 | protein | length=1012 (NCU02295)	| Neurospora crassa OR74A | phosphatidylinositol-4-phosphate 5-kinase its3 | protein | length=1012	NCU02295	Neurospora crassa OR74A_rev.fasta	111881	1	42	53	53	0.0025	0.524
Vince Research01272020	Uncategorized Sample	Vince	GPM22200021135	Cluster of | Neurospora crassa OR74A | replication factor C subunit 4 | protein | length=357 (NCU10467)	| Neurospora crassa OR74A | replication factor C subunit 4 | protein | length=357	NCU10467	Neurospora crassa OR74A_rev.fasta	39353.5	1	15	20	21	0.001	0.524
Vince Research01272020	Uncategorized Sample	Vince	GPM22200021135	Cluster of | Neurospora crassa OR74A | Hsp70-like protein | protein | length=668 (NCU08693)	| Neurospora crassa OR74A | Hsp70-like protein | protein | length=668	NCU08693	Neurospora crassa OR74A_rev.fasta	72732.8	1	36	57	66	0.0031	0.518
Vince Research01272020	Uncategorized Sample	Vince	GPM22200021135	Cluster of | Neurospora crassa OR74A | Telomere binding protein | protein | length=1092 (NCU00164)	| Neurospora crassa OR74A | Telomere binding protein | protein | length=1092	NCU00164	Neurospora crassa OR74A_rev.fasta	123513	1	58	85	96	0.0045	0.516
Vince Research01272020	Uncategorized Sample	Vince	GPM22200021135	Cluster of | Neurospora crassa OR74A | Histone H2A | protein | length=134 (NCU02437)	| Neurospora crassa OR74A | Histone H2A | protein | length=134	NCU02437	Neurospora crassa OR74A_rev.fasta	14154.9	1	15	18	19	0.0009	0.515
Vince Research01272020	Uncategorized Sample	Vince	GPM22200021135	Cluster of | Neurospora crassa OR74A | Ribosomal protein L14 | protein | length=142 (NCU00634)	| Neurospora crassa OR74A | Ribosomal protein L14 | protein | length=142	NCU00634	Neurospora crassa OR74A_rev.fasta	15854.1	1	12	18	18	0.0008	0.514
Vince Research01272020	Uncategorized Sample	Vince	GPM22200021135	Cluster of | Neurospora crassa OR74A | 60S ribosomal protein L2 | protein | length=254 (NCU00413)	| Neurospora crassa OR74A | 60S ribosomal protein L2 | protein | length=254	NCU00413	Neurospora crassa OR74A_rev.fasta	27356.6	1	25	42	53	0.0025	0.512
Vince Research01272020	Uncategorized Sample	Vince	GPM22200021135	Cluster of | Neurospora crassa OR74A | 40S ribosomal protein S4 | protein | length=261 (NCU02181)	| Neurospora crassa OR74A | 40S ribosomal protein S4 | protein | length=261	NCU02181	Neurospora crassa OR74A_rev.fasta	29597.5	1	21	31	34	0.0016	0.51
Vince Research01272020	Uncategorized Sample	Vince	GPM22200021135	Cluster of | Neurospora crassa OR74A | 60S ribosomal protein L10a | protein | length=217 (NCU00294)	| Neurospora crassa OR74A | 60S ribosomal protein L10a | protein | length=217	NCU00294	Neurospora crassa OR74A_rev.fasta	24127.5	1	21	36	40	0.0019	0.502
Vince Research01272020	Uncategorized Sample	Vince	GPM22200021135	Cluster of Keratin, type I cytoskeletal 9 OS=Homo sapiens GN=KRT9 PE=1 SV=3 (sp|P35527|K1C9_HUMAN)	Keratin, type I cytoskeletal 9 OS=Homo sapiens GN=KRT9 PE=1 SV=3	sp|P35527|K1C9_HUMAN	Neurospora crassa OR74A_rev.fasta	62131	1	26	39	44	0.0021	0.498
Vince Research01272020	Uncategorized Sample	Vince	GPM22200021135	Cluster of | Neurospora crassa OR74A | 60S ribosomal protein P0, 60S ribosomal protein P0, variant 1 | protein | length=313 (NCU07408)	| Neurospora crassa OR74A | 60S ribosomal protein P0, 60S ribosomal protein P0, variant 1 | protein | length=313	NCU07408	Neurospora crassa OR74A_rev.fasta	33535.1	1	15	25	34	0.0016	0.498
Vince Research01272020	Uncategorized Sample	Vince	GPM22200021135	Cluster of | Neurospora crassa OR74A | DNA repair-12 | protein | length=950 (NCU07975)	| Neurospora crassa OR74A | DNA repair-12 | protein | length=950	NCU07975	Neurospora crassa OR74A_rev.fasta	106420	1	39	50	50	0.0024	0.492
Vince Research01272020	Uncategorized Sample	Vince	GPM22200021135	Cluster of | Neurospora crassa OR74A | Ku70/Ku80 family protein | protein | length=645 (NCU08290)	| Neurospora crassa OR74A | Ku70/Ku80 family protein | protein | length=645	NCU08290	Neurospora crassa OR74A_rev.fasta	72355.9	1	29	39	39	0.0018	0.487
Vince Research01272020	Uncategorized Sample	Vince	GPM22200021135	Cluster of | Neurospora crassa OR74A | 60S ribosomal protein L20, 60S ribosomal protein L20, variant 1 | protein | length=148 (NCU08389)	| Neurospora crassa OR74A | 60S ribosomal protein L20, 60S ribosomal protein L20, variant 1 | protein | length=148	NCU08389	Neurospora crassa OR74A_rev.fasta	17334.2	1	17	23	27	0.0013	0.486
Vince Research01272020	Uncategorized Sample	Vince	GPM22200021135	Cluster of | Neurospora crassa OR74A | 40S ribosomal protein S22, 40S ribosomal protein S22, variant 1 | protein | length=130 (NCU06431)	| Neurospora crassa OR74A | 40S ribosomal protein S22, 40S ribosomal protein S22, variant 1 | protein | length=130	NCU06431	Neurospora crassa OR74A_rev.fasta	14820.5	1	7	12	16	0.0008	0.485
Vince Research01272020	Uncategorized Sample	Vince	GPM22200021135	Cluster of | Neurospora crassa OR74A | NAD kinase/ATP NAD kinase | protein | length=612 (NCU03741)	| Neurospora crassa OR74A | NAD kinase/ATP NAD kinase | protein | length=612	NCU03741	Neurospora crassa OR74A_rev.fasta	68898	1	36	62	66	0.0031	0.484
Vince Research01272020	Uncategorized Sample	Vince	GPM22200021135	Cluster of | Neurospora crassa OR74A | 60S ribosomal protein L7 | protein | length=248 (NCU07829)	| Neurospora crassa OR74A | 60S ribosomal protein L7 | protein | length=248	NCU07829	Neurospora crassa OR74A_rev.fasta	28689	1	20	40	50	0.0024	0.484
Vince Research01272020	Uncategorized Sample	Vince	GPM22200021135	Cluster of | Neurospora crassa OR74A | 40S ribosomal protein S6, 40S ribosomal protein S6, variant 1, 40S ribosomal protein S6, variant 2 | protein | length=239 (NCU08502)	| Neurospora crassa OR74A | 40S ribosomal protein S6, 40S ribosomal protein S6, variant 1, 40S ribosomal protein S6, variant 2 | protein | length=239	NCU08502	Neurospora crassa OR74A_rev.fasta	27331.8	1	18	25	28	0.0013	0.481
Vince Research01272020	Uncategorized Sample	Vince	GPM22200021135	Cluster of | Neurospora crassa OR74A | 60S ribosomal protein L25 | protein | length=156 (NCU06226)	| Neurospora crassa OR74A | 60S ribosomal protein L25 | protein | length=156	NCU06226	Neurospora crassa OR74A_rev.fasta	17119.9	1	15	20	24	0.0011	0.481
Vince Research01272020	Uncategorized Sample	Vince	GPM22200021135	Cluster of | Neurospora crassa OR74A | 40S ribosomal protein S18 | protein | length=156 (NCU00475)	| Neurospora crassa OR74A | 40S ribosomal protein S18 | protein | length=156	NCU00475	Neurospora crassa OR74A_rev.fasta	17769	1	12	16	19	0.0009	0.481
Vince Research01272020	Uncategorized Sample	Vince	GPM22200021135	Cluster of | Neurospora crassa OR74A | 60S ribosomal protein L6 | protein | length=202 (NCU02707)	| Neurospora crassa OR74A | 60S ribosomal protein L6 | protein | length=202	NCU02707	Neurospora crassa OR74A_rev.fasta	22475.8	1	12	16	20	0.0009	0.48
Vince Research01272020	Uncategorized Sample	Vince	GPM22200021135	Cluster of | Neurospora crassa OR74A | 60S ribosomal protein L19 | protein | length=192 (NCU05804)	| Neurospora crassa OR74A | 60S ribosomal protein L19 | protein | length=192	NCU05804	Neurospora crassa OR74A_rev.fasta	22348.8	1	19	31	44	0.0021	0.479
Vince Research01272020	Uncategorized Sample	Vince	GPM22200021135	Cluster of | Neurospora crassa OR74A | 60S ribosomal protein L8 | protein | length=211 (NCU04779)	| Neurospora crassa OR74A | 60S ribosomal protein L8 | protein | length=211	NCU04779	Neurospora crassa OR74A_rev.fasta	23864.2	1	21	37	42	0.002	0.479
Vince Research01272020	Uncategorized Sample	Vince	GPM22200021135	Cluster of | Neurospora crassa OR74A | hypothetical protein | protein | length=163 (NCU06743)	| Neurospora crassa OR74A | hypothetical protein | protein | length=163	NCU06743	Neurospora crassa OR74A_rev.fasta	18432.2	1	11	18	19	0.0009	0.479
Vince Research01272020	Uncategorized Sample	Vince	GPM22200021135	Cluster of | Neurospora crassa OR74A | hypothetical protein | protein | length=618 (NCU05513)	| Neurospora crassa OR74A | hypothetical protein | protein | length=618	NCU05513	Neurospora crassa OR74A_rev.fasta	65584.6	1	25	32	32	0.0015	0.476
Vince Research01272020	Uncategorized Sample	Vince	GPM22200021135	Cluster of | Neurospora crassa OR74A | 60S ribosomal protein L5 | protein | length=301 (NCU04331)	| Neurospora crassa OR74A | 60S ribosomal protein L5 | protein | length=301	NCU04331	Neurospora crassa OR74A_rev.fasta	34413.4	1	21	28	34	0.0016	0.475
Vince Research01272020	Uncategorized Sample	Vince	GPM22200021135	Cluster of | Neurospora crassa OR74A | heat shock protein 70 | protein | length=585 (NCU02075)	| Neurospora crassa OR74A | heat shock protein 70 | protein | length=585	NCU02075	Neurospora crassa OR74A_rev.fasta	63510.3	1	27	43	46	0.0022	0.474
Vince Research01272020	Uncategorized Sample	Vince	GPM22200021135	Cluster of | Neurospora crassa OR74A | 40S ribosomal protein S8, 40S ribosomal protein S8, variant 1 | protein | length=202 (NCU08500)	| Neurospora crassa OR74A | 40S ribosomal protein S8, 40S ribosomal protein S8, variant 1 | protein | length=202	NCU08500	Neurospora crassa OR74A_rev.fasta	23011.2	1	11	18	18	0.0008	0.47
Vince Research01272020	Uncategorized Sample	Vince	GPM22200021135	Cluster of | Neurospora crassa OR74A | RuvB-like helicase 2 | protein | length=481 (NCU06854)	| Neurospora crassa OR74A | RuvB-like helicase 2 | protein | length=481	NCU06854	Neurospora crassa OR74A_rev.fasta	52245.1	1	22	26	26	0.0012	0.468
Vince Research01272020	Uncategorized Sample	Vince	GPM22200021135	Cluster of | Neurospora crassa OR74A | elongation factor 1 alpha | protein | length=460 (NCU02003)	| Neurospora crassa OR74A | elongation factor 1 alpha | protein | length=460	NCU02003	Neurospora crassa OR74A_rev.fasta	49672.9	1	25	37	44	0.0021	0.467
Vince Research01272020	Uncategorized Sample	Vince	GPM22200021135	Cluster of | Neurospora crassa OR74A | tubulin beta chain | protein | length=447 (NCU04054)	| Neurospora crassa OR74A | tubulin beta chain | protein | length=447	NCU04054	Neurospora crassa OR74A_rev.fasta	49867.5	1	19	25	25	0.0012	0.465
Vince Research01272020	Uncategorized Sample	Vince	GPM22200021135	Cluster of | Neurospora crassa OR74A | 40S ribosomal protein S13 | protein | length=151 (NCU03038)	| Neurospora crassa OR74A | 40S ribosomal protein S13 | protein | length=151	NCU03038	Neurospora crassa OR74A_rev.fasta	16873.6	1	8	11	14	0.0007	0.464
Vince Research01272020	Uncategorized Sample	Vince	GPM22200021135	Cluster of | Neurospora crassa OR74A | 60S ribosomal protein L10 | protein | length=221 (NCU08964)	| Neurospora crassa OR74A | 60S ribosomal protein L10 | protein | length=221	NCU08964	Neurospora crassa OR74A_rev.fasta	25326.4	1	13	21	29	0.0014	0.462
Vince Research01272020	Uncategorized Sample	Vince	GPM22200021135	Cluster of | Neurospora crassa OR74A | vesicular-fusion protein SEC18 | protein | length=853 (NCU03387)	| Neurospora crassa OR74A | vesicular-fusion protein SEC18 | protein | length=853	NCU03387	Neurospora crassa OR74A_rev.fasta	91731.1	1	28	31	32	0.0015	0.461
Vince Research01272020	Uncategorized Sample	Vince	GPM22200021135	Cluster of | Neurospora crassa OR74A | GTP-binding nuclear protein GSP1/Ran, GTP-binding nuclear protein GSP1/Ran, variant 1 | protein | length=215 (NCU09269)	| Neurospora crassa OR74A | GTP-binding nuclear protein GSP1/Ran, GTP-binding nuclear protein GSP1/Ran, variant 1 | protein | length=215	NCU09269	Neurospora crassa OR74A_rev.fasta	24276.2	1	10	10	10	0.0005	0.46
Vince Research01272020	Uncategorized Sample	Vince	GPM22200021135	Cluster of | Neurospora crassa OR74A | thiamine biosynthesis protein NMT-1 | protein | length=342 (NCU09345)	| Neurospora crassa OR74A | thiamine biosynthesis protein NMT-1 | protein | length=342	NCU09345	Neurospora crassa OR74A_rev.fasta	38199.9	1	13	14	14	0.0007	0.459
Vince Research01272020	Uncategorized Sample	Vince	GPM22200021135	Cluster of | Neurospora crassa OR74A | 26S protease regulatory subunit 8 | protein | length=389 (NCU05363)	| Neurospora crassa OR74A | 26S protease regulatory subunit 8 | protein | length=389	NCU05363	Neurospora crassa OR74A_rev.fasta	43585.8	1	13	15	16	0.0008	0.458
Vince Research01272020	Uncategorized Sample	Vince	GPM22200021135	Cluster of | Neurospora crassa OR74A | 40S ribosomal protein S19 | protein | length=149 (NCU07826)	| Neurospora crassa OR74A | 40S ribosomal protein S19 | protein | length=149	NCU07826	Neurospora crassa OR74A_rev.fasta	16669.3	1	13	23	24	0.0011	0.456
Vince Research01272020	Uncategorized Sample	Vince	GPM22200021135	Cluster of | Neurospora crassa OR74A | ribosomal protein Srp1 | protein | length=160 (NCU01948)	| Neurospora crassa OR74A | ribosomal protein Srp1 | protein | length=160	NCU01948	Neurospora crassa OR74A_rev.fasta	18214.6	1	9	10	10	0.0005	0.456
Vince Research01272020	Uncategorized Sample	Vince	GPM22200021135	Cluster of | Neurospora crassa OR74A | ribosomal protein S12 | protein | length=152 (NCU00971)	| Neurospora crassa OR74A | ribosomal protein S12 | protein | length=152	NCU00971	Neurospora crassa OR74A_rev.fasta	17383.3	1	9	19	21	0.001	0.454
Vince Research01272020	Uncategorized Sample	Vince	GPM22200021135	Cluster of | Neurospora crassa OR74A | 40S ribosomal protein S2 | protein | length=265 (NCU06047)	| Neurospora crassa OR74A | 40S ribosomal protein S2 | protein | length=265	NCU06047	Neurospora crassa OR74A_rev.fasta	28757.4	1	19	30	30	0.0014	0.453
Vince Research01272020	Uncategorized Sample	Vince	GPM22200021135	Cluster of | Neurospora crassa OR74A | DNA damage checkpoint protein rad24, DNA damage checkpoint protein rad24, variant 1 | protein | length=224 (NCU03300)	| Neurospora crassa OR74A | DNA damage checkpoint protein rad24, DNA damage checkpoint protein rad24, variant 1 | protein | length=224	NCU03300	Neurospora crassa OR74A_rev.fasta	25195.7	1	6	8	10	0.0005	0.446
Vince Research01272020	Uncategorized Sample	Vince	GPM22200021135	Cluster of | Neurospora crassa OR74A | 26S protease regulatory subunit 7 | protein | length=439 (NCU02840)	| Neurospora crassa OR74A | 26S protease regulatory subunit 7 | protein | length=439	NCU02840	Neurospora crassa OR74A_rev.fasta	48917.3	1	17	19	20	0.0009	0.442
Vince Research01272020	Uncategorized Sample	Vince	GPM22200021135	Cluster of | Neurospora crassa OR74A | actin | protein | length=469 (NCU02555)	| Neurospora crassa OR74A | actin | protein | length=469	NCU02555	Neurospora crassa OR74A_rev.fasta	51985.4	1	16	18	18	0.0008	0.437
Vince Research01272020	Uncategorized Sample	Vince	GPM22200021135	Cluster of | Neurospora crassa OR74A | WD repeat-containing protein | protein | length=521 (NCU09302)	| Neurospora crassa OR74A | WD repeat-containing protein | protein | length=521	NCU09302	Neurospora crassa OR74A_rev.fasta	57657.7	1	17	19	19	0.0009	0.436
Vince Research01272020	Uncategorized Sample	Vince	GPM22200021135	Cluster of | Neurospora crassa OR74A | isocitrate dehydrogenase subunit 2 | protein | length=379 (NCU07697)	| Neurospora crassa OR74A | isocitrate dehydrogenase subunit 2 | protein | length=379	NCU07697	Neurospora crassa OR74A_rev.fasta	40987.8	1	13	18	18	0.0008	0.435
Vince Research01272020	Uncategorized Sample	Vince	GPM22200021135	Cluster of | Neurospora crassa OR74A | mitochondrial ATP synthase alpha subunit | protein | length=551 (NCU02514)	| Neurospora crassa OR74A | mitochondrial ATP synthase alpha subunit | protein | length=551	NCU02514	Neurospora crassa OR74A_rev.fasta	59522.6	1	20	24	24	0.0011	0.434
Vince Research01272020	Uncategorized Sample	Vince	GPM22200021135	Cluster of | Neurospora crassa OR74A | 40S ribosomal protein S24 | protein | length=136 (NCU07182)	| Neurospora crassa OR74A | 40S ribosomal protein S24 | protein | length=136	NCU07182	Neurospora crassa OR74A_rev.fasta	15562.8	1	10	20	20	0.0009	0.434
Vince Research01272020	Uncategorized Sample	Vince	GPM22200021135	Cluster of | Neurospora crassa OR74A | 40S ribosomal protein S9 | protein | length=190 (NCU01949)	| Neurospora crassa OR74A | 40S ribosomal protein S9 | protein | length=190	NCU01949	Neurospora crassa OR74A_rev.fasta	21807.1	1	11	15	16	0.0008	0.432
Vince Research01272020	Uncategorized Sample	Vince	GPM22200021135	Cluster of | Neurospora crassa OR74A | ATP synthase beta subunit | protein | length=519 (NCU05430)	| Neurospora crassa OR74A | ATP synthase beta subunit | protein | length=519	NCU05430	Neurospora crassa OR74A_rev.fasta	55534.4	1	15	18	18	0.0008	0.43
Vince Research01272020	Uncategorized Sample	Vince	GPM22200021135	Cluster of | Neurospora crassa OR74A | NIMA-interacting protein TinC | protein | length=795 (NCU03125)	| Neurospora crassa OR74A | NIMA-interacting protein TinC | protein | length=795	NCU03125	Neurospora crassa OR74A_rev.fasta	89582.7	1	24	30	31	0.0015	0.428
Vince Research01272020	Uncategorized Sample	Vince	GPM22200021135	Cluster of | Neurospora crassa OR74A | regulatory particle, ATPase-like-5 protein | protein | length=460 (NCU04414)	| Neurospora crassa OR74A | regulatory particle, ATPase-like-5 protein | protein | length=460	NCU04414	Neurospora crassa OR74A_rev.fasta	51444.3	1	15	18	18	0.0008	0.426
Vince Research01272020	Uncategorized Sample	Vince	GPM22200021135	Cluster of | Neurospora crassa OR74A | thiazole biosynthetic enzyme, thiazole biosynthetic enzyme, variant 1, thiazole biosynthetic enzyme, variant 2, thiazole biosynthetic enzyme, variant 3 | protein | length=344 (NCU06110)	| Neurospora crassa OR74A | thiazole biosynthetic enzyme, thiazole biosynthetic enzyme, variant 1, thiazole biosynthetic enzyme, variant 2, thiazole biosynthetic enzyme, variant 3 | protein | length=344	NCU06110	Neurospora crassa OR74A_rev.fasta	36863.8	1	11	19	19	0.0009	0.424
Vince Research01272020	Uncategorized Sample	Vince	GPM22200021135	Cluster of | Neurospora crassa OR74A | translation elongation factor aEF-2 | protein | length=844 (NCU07700)	| Neurospora crassa OR74A | translation elongation factor aEF-2 | protein | length=844	NCU07700	Neurospora crassa OR74A_rev.fasta	93264	1	32	40	40	0.0019	0.423
Vince Research01272020	Uncategorized Sample	Vince	GPM22200021135	Cluster of | Neurospora crassa OR74A | ubiquitin/ribosomal protein S27a, ubiquitin/ribosomal protein S27a, variant 1 | protein | length=154 (NCU04553)	| Neurospora crassa OR74A | ubiquitin/ribosomal protein S27a, ubiquitin/ribosomal protein S27a, variant 1 | protein | length=154	NCU04553	Neurospora crassa OR74A_rev.fasta	17739.3	1	5	12	22	0.001	0.422
Vince Research01272020	Uncategorized Sample	Vince	GPM22200021135	Cluster of | Neurospora crassa OR74A | 60S ribosomal protein | protein | length=122 (NCU08344)	| Neurospora crassa OR74A | 60S ribosomal protein | protein | length=122	NCU08344	Neurospora crassa OR74A_rev.fasta	14065.2	1	7	13	13	0.0006	0.418
Vince Research01272020	Uncategorized Sample	Vince	GPM22200021135	Cluster of | Neurospora crassa OR74A | 60S ribosomal protein L27 | protein | length=135 (NCU01827)	| Neurospora crassa OR74A | 60S ribosomal protein L27 | protein | length=135	NCU01827	Neurospora crassa OR74A_rev.fasta	15722.8	1	9	20	30	0.0014	0.415
Vince Research01272020	Uncategorized Sample	Vince	GPM22200021135	Cluster of | Neurospora crassa OR74A | 60S ribosomal protein L32 | protein | length=131 (NCU00464)	| Neurospora crassa OR74A | 60S ribosomal protein L32 | protein | length=131	NCU00464	Neurospora crassa OR74A_rev.fasta	14964.9	1	11	24	31	0.0015	0.412
Vince Research01272020	Uncategorized Sample	Vince	GPM22200021135	Cluster of | Neurospora crassa OR74A | transcriptional repressor rco-1 | protein | length=604 (NCU06205)	| Neurospora crassa OR74A | transcriptional repressor rco-1 | protein | length=604	NCU06205	Neurospora crassa OR74A_rev.fasta	66086.1	1	17	23	23	0.0011	0.411
Vince Research01272020	Uncategorized Sample	Vince	GPM22200021135	Cluster of Keratin, type II cytoskeletal 2 epidermal OS=Homo sapiens GN=KRT2 PE=1 SV=2 (sp|P35908|K22E_HUMAN)	Keratin, type II cytoskeletal 2 epidermal OS=Homo sapiens GN=KRT2 PE=1 SV=2	sp|P35908|K22E_HUMAN	Neurospora crassa OR74A_rev.fasta	65866.4	1	19	23	28	0.0013	0.405
Vince Research01272020	Uncategorized Sample	Vince	GPM22200021135	Cluster of | Neurospora crassa OR74A | 60S ribosomal protein L22 | protein | length=126 (NCU06661)	| Neurospora crassa OR74A | 60S ribosomal protein L22 | protein | length=126	NCU06661	Neurospora crassa OR74A_rev.fasta	14209.9	1	7	9	9	0.0004	0.405
Vince Research01272020	Uncategorized Sample	Vince	GPM22200021135	Cluster of | Neurospora crassa OR74A | hypothetical protein, hypothetical protein, variant 1 | protein | length=486 (NCU02957)	| Neurospora crassa OR74A | hypothetical protein, hypothetical protein, variant 1 | protein | length=486	NCU02957	Neurospora crassa OR74A_rev.fasta	53685.3	1	13	13	13	0.0006	0.403
Vince Research01272020	Uncategorized Sample	Vince	GPM22200021135	Cluster of | Neurospora crassa OR74A | DNA-binding protein cre-1 | protein | length=430 (NCU08807)	| Neurospora crassa OR74A | DNA-binding protein cre-1 | protein | length=430	NCU08807	Neurospora crassa OR74A_rev.fasta	46897.8	1	10	12	12	0.0006	0.402
Vince Research01272020	Uncategorized Sample	Vince	GPM22200021135	Cluster of | Neurospora crassa OR74A | 40S ribosomal protein S7 | protein | length=202 (NCU00258)	| Neurospora crassa OR74A | 40S ribosomal protein S7 | protein | length=202	NCU00258	Neurospora crassa OR74A_rev.fasta	22873	1	11	12	14	0.0007	0.401
Vince Research01272020	Uncategorized Sample	Vince	GPM22200021135	Cluster of | Neurospora crassa OR74A | 60S ribosomal protein L38 | protein | length=80 (NCU03635)	| Neurospora crassa OR74A | 60S ribosomal protein L38 | protein | length=80	NCU03635	Neurospora crassa OR74A_rev.fasta	9149.6	1	5	5	8	0.0004	0.4
Vince Research01272020	Uncategorized Sample	Vince	GPM22200021135	Cluster of | Neurospora crassa OR74A | transcription initiation factor-8 | protein | length=226 (NCU00444)	| Neurospora crassa OR74A | transcription initiation factor-8 | protein | length=226	NCU00444	Neurospora crassa OR74A_rev.fasta	26127.2	1	12	18	18	0.0008	0.394
Vince Research01272020	Uncategorized Sample	Vince	GPM22200021135	Cluster of | Neurospora crassa OR74A | hypothetical protein | protein | length=314 (NCU03126)	| Neurospora crassa OR74A | hypothetical protein | protein | length=314	NCU03126	Neurospora crassa OR74A_rev.fasta	35384.8	1	13	17	17	0.0008	0.392
Vince Research01272020	Uncategorized Sample	Vince	GPM22200021135	Cluster of | Neurospora crassa OR74A | alpha tubulin | protein | length=454 (NCU09132)	| Neurospora crassa OR74A | alpha tubulin | protein | length=454	NCU09132	Neurospora crassa OR74A_rev.fasta	50256.4	1	10	15	16	0.0008	0.392
Vince Research01272020	Uncategorized Sample	Vince	GPM22200021135	Cluster of | Neurospora crassa OR74A | 60S ribosomal protein L17 | protein | length=186 (NCU03703)	| Neurospora crassa OR74A | 60S ribosomal protein L17 | protein | length=186	NCU03703	Neurospora crassa OR74A_rev.fasta	20763.9	1	9	13	18	0.0008	0.387
Vince Research01272020	Uncategorized Sample	Vince	GPM22200021135	Cluster of | Neurospora crassa OR74A | Histone H1, histone H1, variant 1 | protein | length=236 (NCU06863)	| Neurospora crassa OR74A | Histone H1, histone H1, variant 1 | protein | length=236	NCU06863	Neurospora crassa OR74A_rev.fasta	24176.5	1	16	27	32	0.0015	0.386
Vince Research01272020	Uncategorized Sample	Vince	GPM22200021135	Cluster of | Neurospora crassa OR74A | 60S ribosomal protein L34 | protein | length=117 (NCU07857)	| Neurospora crassa OR74A | 60S ribosomal protein L34 | protein | length=117	NCU07857	Neurospora crassa OR74A_rev.fasta	13194.6	1	9	11	12	0.0006	0.385
Vince Research01272020	Uncategorized Sample	Vince	GPM22200021135	Cluster of | Neurospora crassa OR74A | DNA polymerase epsilon subunit C | protein | length=404 (NCU06405)	| Neurospora crassa OR74A | DNA polymerase epsilon subunit C | protein | length=404	NCU06405	Neurospora crassa OR74A_rev.fasta	44856.4	1	11	16	16	0.0008	0.384
Vince Research01272020	Uncategorized Sample	Vince	GPM22200021135	Cluster of | Neurospora crassa OR74A | S-adenosylmethionine synthetase, s-adenosylmethionine synthetase, variant 1 | protein | length=395 (NCU02657)	| Neurospora crassa OR74A | S-adenosylmethionine synthetase, s-adenosylmethionine synthetase, variant 1 | protein | length=395	NCU02657	Neurospora crassa OR74A_rev.fasta	42987.1	1	12	19	19	0.0009	0.382
Vince Research01272020	Uncategorized Sample	Vince	GPM22200021135	Cluster of | Neurospora crassa OR74A | Malate dehydrogenase | protein | length=336 (NCU04899)	| Neurospora crassa OR74A | Malate dehydrogenase | protein | length=336	NCU04899	Neurospora crassa OR74A_rev.fasta	35518.3	1	10	10	12	0.0006	0.381
Vince Research01272020	Uncategorized Sample	Vince	GPM22200021135	Cluster of | Neurospora crassa OR74A | replication factor C subunit 1 | protein | length=1086 (NCU06767)	| Neurospora crassa OR74A | replication factor C subunit 1 | protein | length=1086	NCU06767	Neurospora crassa OR74A_rev.fasta	119101	1	32	40	40	0.0019	0.378
Vince Research01272020	Uncategorized Sample	Vince	GPM22200021135	Cluster of | Neurospora crassa OR74A | guanine nucleotide-binding protein subunit beta-like protein | protein | length=316 (NCU05810)	| Neurospora crassa OR74A | guanine nucleotide-binding protein subunit beta-like protein | protein | length=316	NCU05810	Neurospora crassa OR74A_rev.fasta	35117.3	1	14	21	21	0.001	0.377
Vince Research01272020	Uncategorized Sample	Vince	GPM22200021135	Cluster of | Neurospora crassa OR74A | 60S ribosomal protein L11 | protein | length=174 (NCU02509)	| Neurospora crassa OR74A | 60S ribosomal protein L11 | protein | length=174	NCU02509	Neurospora crassa OR74A_rev.fasta	20084.6	1	8	9	11	0.0005	0.374
Vince Research01272020	Uncategorized Sample	Vince	GPM22200021135	Cluster of | Neurospora crassa OR74A | hypothetical protein, hypothetical protein, variant 1 | protein | length=393 (NCU02634)	| Neurospora crassa OR74A | hypothetical protein, hypothetical protein, variant 1 | protein | length=393	NCU02634	Neurospora crassa OR74A_rev.fasta	41870.2	1	8	11	11	0.0005	0.372
Vince Research01272020	Uncategorized Sample	Vince	GPM22200021135	Cluster of | Neurospora crassa OR74A | rRNA 2'-O-methyltransferase fibrillarin | protein | length=323 (NCU03702)	| Neurospora crassa OR74A | rRNA 2'-O-methyltransferase fibrillarin | protein | length=323	NCU03702	Neurospora crassa OR74A_rev.fasta	33812.8	1	9	10	10	0.0005	0.372
Vince Research01272020	Uncategorized Sample	Vince	GPM22200021135	Cluster of | Neurospora crassa OR74A | SIK1 | protein | length=521 (NCU06943)	| Neurospora crassa OR74A | SIK1 | protein | length=521	NCU06943	Neurospora crassa OR74A_rev.fasta	57575.7	1	16	17	17	0.0008	0.369
Vince Research01272020	Uncategorized Sample	Vince	GPM22200021135	Cluster of | Neurospora crassa OR74A | 26S proteasome regulatory subunit rpn-8 | protein | length=352 (NCU01547)	| Neurospora crassa OR74A | 26S proteasome regulatory subunit rpn-8 | protein | length=352	NCU01547	Neurospora crassa OR74A_rev.fasta	39104.6	1	10	10	10	0.0005	0.369
Vince Research01272020	Uncategorized Sample	Vince	GPM22200021135	Cluster of | Neurospora crassa OR74A | 26S protease regulatory subunit 6B | protein | length=421 (NCU02260)	| Neurospora crassa OR74A | 26S protease regulatory subunit 6B | protein | length=421	NCU02260	Neurospora crassa OR74A_rev.fasta	46933.1	1	13	15	16	0.0008	0.368
Vince Research01272020	Uncategorized Sample	Vince	GPM22200021135	Cluster of | Neurospora crassa OR74A | 40S ribosomal protein S28 | protein | length=68 (NCU05599)	| Neurospora crassa OR74A | 40S ribosomal protein S28 | protein | length=68	NCU05599	Neurospora crassa OR74A_rev.fasta	7720.9	1	2	3	3	0.0001	0.368
Vince Research01272020	Uncategorized Sample	Vince	GPM22200021135	Cluster of | Neurospora crassa OR74A | hypothetical protein | protein | length=144 (NCU02405)	| Neurospora crassa OR74A | hypothetical protein | protein | length=144	NCU02405	Neurospora crassa OR74A_rev.fasta	15761.8	1	3	3	3	0.0001	0.368
Vince Research01272020	Uncategorized Sample	Vince	GPM22200021135	Cluster of | Neurospora crassa OR74A | 40S ribosomal protein S16 | protein | length=142 (NCU08620)	| Neurospora crassa OR74A | 40S ribosomal protein S16 | protein | length=142	NCU08620	Neurospora crassa OR74A_rev.fasta	15723.9	1	8	10	10	0.0005	0.366
Vince Research01272020	Uncategorized Sample	Vince	GPM22200021135	Cluster of | Neurospora crassa OR74A | hypothetical protein | protein | length=488 (NCU01581)	| Neurospora crassa OR74A | hypothetical protein | protein | length=488	NCU01581	Neurospora crassa OR74A_rev.fasta	52445	1	13	19	19	0.0009	0.365
Vince Research01272020	Uncategorized Sample	Vince	GPM22200021135	Cluster of | Neurospora crassa OR74A | TBP associated factor, TBP associated factor, variant 1 | protein | length=1893 (NCU07556)	| Neurospora crassa OR74A | TBP associated factor, TBP associated factor, variant 1 | protein | length=1893	NCU07556	Neurospora crassa OR74A_rev.fasta	210360	1	60	75	75	0.0035	0.363
Vince Research01272020	Uncategorized Sample	Vince	GPM22200021135	Cluster of | Neurospora crassa OR74A | glucosamine-fructose-6-phosphate aminotransferase | protein | length=700 (NCU07366)	| Neurospora crassa OR74A | glucosamine-fructose-6-phosphate aminotransferase | protein | length=700	NCU07366	Neurospora crassa OR74A_rev.fasta	77965.6	1	19	26	26	0.0012	0.36
Vince Research01272020	Uncategorized Sample	Vince	GPM22200021135	Cluster of | Neurospora crassa OR74A | hypothetical protein | protein | length=353 (NCU07568)	| Neurospora crassa OR74A | hypothetical protein | protein | length=353	NCU07568	Neurospora crassa OR74A_rev.fasta	38188.2	1	8	10	10	0.0005	0.36
Vince Research01272020	Uncategorized Sample	Vince	GPM22200021135	Cluster of | Neurospora crassa OR74A | 26S proteasome regulatory subunit Rpn1 | protein | length=902 (NCU07721)	| Neurospora crassa OR74A | 26S proteasome regulatory subunit Rpn1 | protein | length=902	NCU07721	Neurospora crassa OR74A_rev.fasta	100254	1	29	35	35	0.0017	0.358
Vince Research01272020	Uncategorized Sample	Vince	GPM22200021135	Cluster of | Neurospora crassa OR74A | zinc finger transcription factor-33 | protein | length=785 (NCU05064)	| Neurospora crassa OR74A | zinc finger transcription factor-33 | protein | length=785	NCU05064	Neurospora crassa OR74A_rev.fasta	85235.7	1	16	17	19	0.0009	0.357
Vince Research01272020	Uncategorized Sample	Vince	GPM22200021135	Cluster of | Neurospora crassa OR74A | replication factor-A protein 1 | protein | length=610 (NCU03606)	| Neurospora crassa OR74A | replication factor-A protein 1 | protein | length=610	NCU03606	Neurospora crassa OR74A_rev.fasta	68626	1	15	16	16	0.0008	0.352
Vince Research01272020	Uncategorized Sample	Vince	GPM22200021135	Cluster of | Neurospora crassa OR74A | nucleolar protein nop-58 | protein | length=597 (NCU03396)	| Neurospora crassa OR74A | nucleolar protein nop-58 | protein | length=597	NCU03396	Neurospora crassa OR74A_rev.fasta	66085.4	1	15	20	20	0.0009	0.348
Vince Research01272020	Uncategorized Sample	Vince	GPM22200021135	Cluster of | Neurospora crassa OR74A | RNA-binding La domain-containing protein | protein | length=376 (NCU08295)	| Neurospora crassa OR74A | RNA-binding La domain-containing protein | protein | length=376	NCU08295	Neurospora crassa OR74A_rev.fasta	41700.4	1	8	9	9	0.0004	0.348
Vince Research01272020	Uncategorized Sample	Vince	GPM22200021135	Cluster of | Neurospora crassa OR74A | ADP-ribosylation factor 6 | protein | length=184 (NCU07173)	| Neurospora crassa OR74A | ADP-ribosylation factor 6 | protein | length=184	NCU07173	Neurospora crassa OR74A_rev.fasta	20847.9	1	5	5	5	0.0002	0.348
Vince Research01272020	Uncategorized Sample	Vince	GPM22200021135	Cluster of | Neurospora crassa OR74A | small GTP-binding protein | protein | length=203 (NCU08477)	| Neurospora crassa OR74A | small GTP-binding protein | protein | length=203	NCU08477	Neurospora crassa OR74A_rev.fasta	22476.8	1	4	4	6	0.0003	0.345
Vince Research01272020	Uncategorized Sample	Vince	GPM22200021135	Cluster of Keratin, type I cytoskeletal 10 OS=Homo sapiens GN=KRT10 PE=1 SV=6 (sp|P13645|K1C10_HUMAN)	Keratin, type I cytoskeletal 10 OS=Homo sapiens GN=KRT10 PE=1 SV=6	sp|P13645|K1C10_HUMAN	Neurospora crassa OR74A_rev.fasta	59520.3	1	19	29	38	0.0018	0.344
Vince Research01272020	Uncategorized Sample	Vince	GPM22200021135	Cluster of | Neurospora crassa OR74A | Telomere binding protein | protein | length=384 (NCU03830)	| Neurospora crassa OR74A | Telomere binding protein | protein | length=384	NCU03830	Neurospora crassa OR74A_rev.fasta	41780.7	1	9	11	11	0.0005	0.344
Vince Research01272020	Uncategorized Sample	Vince	GPM22200021135	Cluster of | Neurospora crassa OR74A | hypothetical protein | protein | length=304 (NCU06623)	| Neurospora crassa OR74A | hypothetical protein | protein | length=304	NCU06623	Neurospora crassa OR74A_rev.fasta	31090.8	1	7	10	10	0.0005	0.342
Vince Research01272020	Uncategorized Sample	Vince	GPM22200021135	Cluster of | Neurospora crassa OR74A | 60S ribosomal protein L15 | protein | length=203 (NCU01776)	| Neurospora crassa OR74A | 60S ribosomal protein L15 | protein | length=203	NCU01776	Neurospora crassa OR74A_rev.fasta	24190.6	1	13	25	32	0.0015	0.34
Vince Research01272020	Uncategorized Sample	Vince	GPM22200021135	Cluster of | Neurospora crassa OR74A | 26S protease regulatory subunit 4 | protein | length=459 (NCU01224)	| Neurospora crassa OR74A | 26S protease regulatory subunit 4 | protein | length=459	NCU01224	Neurospora crassa OR74A_rev.fasta	50972	1	14	16	17	0.0008	0.34
Vince Research01272020	Uncategorized Sample	Vince	GPM22200021135	Cluster of | Neurospora crassa OR74A | isoleucyl-tRNA synthetase | protein | length=1079 (NCU03575)	| Neurospora crassa OR74A | isoleucyl-tRNA synthetase | protein | length=1079	NCU03575	Neurospora crassa OR74A_rev.fasta	124217	1	31	39	42	0.002	0.339
Vince Research01272020	Uncategorized Sample	Vince	GPM22200021135	Cluster of | Neurospora crassa OR74A | 60S ribosomal protein L33 | protein | length=109 (NCU09109)	| Neurospora crassa OR74A | 60S ribosomal protein L33 | protein | length=109	NCU09109	Neurospora crassa OR74A_rev.fasta	12178.2	1	7	13	17	0.0008	0.339
Vince Research01272020	Uncategorized Sample	Vince	GPM22200021135	Cluster of | Neurospora crassa OR74A | Homocitrate synthase, homocitrate synthase, variant 1, homocitrate synthase, variant 2 | protein | length=425 (NCU05526)	| Neurospora crassa OR74A | Homocitrate synthase, homocitrate synthase, variant 1, homocitrate synthase, variant 2 | protein | length=425	NCU05526	Neurospora crassa OR74A_rev.fasta	46325.9	1	10	13	13	0.0006	0.339
Vince Research01272020	Uncategorized Sample	Vince	GPM22200021135	Cluster of | Neurospora crassa OR74A | 60S ribosomal protein L37, 60S ribosomal protein L37, variant 1 | protein | length=92 (NCU01966)	| Neurospora crassa OR74A | 60S ribosomal protein L37, 60S ribosomal protein L37, variant 1 | protein | length=92	NCU01966	Neurospora crassa OR74A_rev.fasta	10233	1	5	7	10	0.0005	0.337
Vince Research01272020	Uncategorized Sample	Vince	GPM22200021135	Cluster of | Neurospora crassa OR74A | hypothetical protein | protein | length=324 (NCU02695)	| Neurospora crassa OR74A | hypothetical protein | protein | length=324	NCU02695	Neurospora crassa OR74A_rev.fasta	35514	1	19	35	40	0.0019	0.333
Vince Research01272020	Uncategorized Sample	Vince	GPM22200021135	Cluster of | Neurospora crassa OR74A | 60S ribosomal protein L18 | protein | length=183 (NCU03988)	| Neurospora crassa OR74A | 60S ribosomal protein L18 | protein | length=183	NCU03988	Neurospora crassa OR74A_rev.fasta	20602.9	1	9	16	19	0.0009	0.333
Vince Research01272020	Uncategorized Sample	Vince	GPM22200021135	Cluster of | Neurospora crassa OR74A | 60s ribosomal protein L24 | protein | length=156 (NCU03150)	| Neurospora crassa OR74A | 60s ribosomal protein L24 | protein | length=156	NCU03150	Neurospora crassa OR74A_rev.fasta	17612.1	1	7	7	8	0.0004	0.333
Vince Research01272020	Uncategorized Sample	Vince	GPM22200021135	Cluster of | Neurospora crassa OR74A | hypothetical protein | protein | length=676 (NCU06099)	| Neurospora crassa OR74A | hypothetical protein | protein | length=676	NCU06099	Neurospora crassa OR74A_rev.fasta	73977.5	1	15	18	18	0.0008	0.327
Vince Research01272020	Uncategorized Sample	Vince	GPM22200021135	Cluster of | Neurospora crassa OR74A | 60S ribosomal protein L36 | protein | length=104 (NCU03302)	| Neurospora crassa OR74A | 60S ribosomal protein L36 | protein | length=104	NCU03302	Neurospora crassa OR74A_rev.fasta	11555.9	1	7	8	9	0.0004	0.327
Vince Research01272020	Uncategorized Sample	Vince	GPM22200021135	Cluster of | Neurospora crassa OR74A | 26S proteasome regulatory subunit Rpn2 | protein | length=1188 (NCU09450)	| Neurospora crassa OR74A | 26S proteasome regulatory subunit Rpn2 | protein | length=1188	NCU09450	Neurospora crassa OR74A_rev.fasta	127970	1	25	33	33	0.0016	0.326
Vince Research01272020	Uncategorized Sample	Vince	GPM22200021135	Cluster of | Neurospora crassa OR74A | hypothetical protein, hypothetical protein, variant 1 | protein | length=326 (NCU16541)	| Neurospora crassa OR74A | hypothetical protein, hypothetical protein, variant 1 | protein | length=326	NCU16541	Neurospora crassa OR74A_rev.fasta	34034.2	1	7	9	10	0.0005	0.325
Vince Research01272020	Uncategorized Sample	Vince	GPM22200021135	Cluster of | Neurospora crassa OR74A | hypothetical protein, hypothetical protein, variant 1 | protein | length=62 (NCU09089)	| Neurospora crassa OR74A | hypothetical protein, hypothetical protein, variant 1 | protein | length=62	NCU09089	Neurospora crassa OR74A_rev.fasta	6910.3	1	4	5	5	0.0002	0.323
Vince Research01272020	Uncategorized Sample	Vince	GPM22200021135	Cluster of | Neurospora crassa OR74A | DUF500 and SH3 domain-containing protein | protein | length=413 (NCU03888)	| Neurospora crassa OR74A | DUF500 and SH3 domain-containing protein | protein | length=413	NCU03888	Neurospora crassa OR74A_rev.fasta	43056.5	1	9	11	11	0.0005	0.322
Vince Research01272020	Uncategorized Sample	Vince	GPM22200021135	Cluster of | Neurospora crassa OR74A | 60S ribosomal protein L16, 60S ribosomal protein L16, variant 1 | protein | length=231 (NCU01221)	| Neurospora crassa OR74A | 60S ribosomal protein L16, 60S ribosomal protein L16, variant 1 | protein | length=231	NCU01221	Neurospora crassa OR74A_rev.fasta	26128.7	1	13	19	27	0.0013	0.32
Vince Research01272020	Uncategorized Sample	Vince	GPM22200021135	Cluster of | Neurospora crassa OR74A | serine-threonine protein phosphatase-6 | protein | length=695 (NCU09861)	| Neurospora crassa OR74A | serine-threonine protein phosphatase-6 | protein | length=695	NCU09861	Neurospora crassa OR74A_rev.fasta	72998.7	1	12	13	13	0.0006	0.319
Vince Research01272020	Uncategorized Sample	Vince	GPM22200021135	Cluster of | Neurospora crassa OR74A | dynamin-1 | protein | length=801 (NCU09808)	| Neurospora crassa OR74A | dynamin-1 | protein | length=801	NCU09808	Neurospora crassa OR74A_rev.fasta	88934.2	1	19	22	22	0.001	0.318
Vince Research01272020	Uncategorized Sample	Vince	GPM22200021135	Cluster of | Neurospora crassa OR74A | proteasome 26S subunit | protein | length=390 (NCU07367)	| Neurospora crassa OR74A | proteasome 26S subunit | protein | length=390	NCU07367	Neurospora crassa OR74A_rev.fasta	43627.6	1	10	10	11	0.0005	0.318
Vince Research01272020	Uncategorized Sample	Vince	GPM22200021135	Cluster of | Neurospora crassa OR74A | 26S proteasome non-ATPase regulatory subunit 12 | protein | length=494 (NCU02650)	| Neurospora crassa OR74A | 26S proteasome non-ATPase regulatory subunit 12 | protein | length=494	NCU02650	Neurospora crassa OR74A_rev.fasta	57022.4	1	11	12	13	0.0006	0.314
Vince Research01272020	Uncategorized Sample	Vince	GPM22200021135	Cluster of | Neurospora crassa OR74A | T-complex protein 1 subunit gamma | protein | length=540 (NCU01843)	| Neurospora crassa OR74A | T-complex protein 1 subunit gamma | protein | length=540	NCU01843	Neurospora crassa OR74A_rev.fasta	59537.5	1	14	14	14	0.0007	0.313
Vince Research01272020	Uncategorized Sample	Vince	GPM22200021135	Cluster of | Neurospora crassa OR74A | tricarboxylic acid-5 protein, tricarboxylic acid-5 protein, variant 1, tricarboxylic acid-5 protein, variant 2 | protein | length=462 (NCU03857)	| Neurospora crassa OR74A | tricarboxylic acid-5 protein, tricarboxylic acid-5 protein, variant 1, tricarboxylic acid-5 protein, variant 2 | protein | length=462	NCU03857	Neurospora crassa OR74A_rev.fasta	51850.3	1	13	15	15	0.0007	0.312
Vince Research01272020	Uncategorized Sample	Vince	GPM22200021135	Cluster of | Neurospora crassa OR74A | GTP-binding protein | protein | length=550 (NCU03066)	| Neurospora crassa OR74A | GTP-binding protein | protein | length=550	NCU03066	Neurospora crassa OR74A_rev.fasta	60321.9	1	13	13	13	0.0006	0.309
Vince Research01272020	Uncategorized Sample	Vince	GPM22200021135	Cluster of | Neurospora crassa OR74A | Histone H3 | protein | length=136 (NCU01635)	| Neurospora crassa OR74A | Histone H3 | protein | length=136	NCU01635	Neurospora crassa OR74A_rev.fasta	15392.6	1	4	4	6	0.0003	0.309
Vince Research01272020	Uncategorized Sample	Vince	GPM22200021135	Cluster of | Neurospora crassa OR74A | hypothetical protein, hypothetical protein, variant 1 | protein | length=353 (NCU08362)	| Neurospora crassa OR74A | hypothetical protein, hypothetical protein, variant 1 | protein | length=353	NCU08362	Neurospora crassa OR74A_rev.fasta	38026.7	1	11	16	16	0.0008	0.306
Vince Research01272020	Uncategorized Sample	Vince	GPM22200021135	Cluster of | Neurospora crassa OR74A | 60S ribosomal protein L35 | protein | length=125 (NCU10498)	| Neurospora crassa OR74A | 60S ribosomal protein L35 | protein | length=125	NCU10498	Neurospora crassa OR74A_rev.fasta	14410.3	1	5	6	6	0.0003	0.304
Vince Research01272020	Uncategorized Sample	Vince	GPM22200021135	Cluster of | Neurospora crassa OR74A | hypothetical protein | protein | length=1955 (NCU06484)	| Neurospora crassa OR74A | hypothetical protein | protein | length=1955	NCU06484	Neurospora crassa OR74A_rev.fasta	214393	1	42	49	50	0.0024	0.303
Vince Research01272020	Uncategorized Sample	Vince	GPM22200021135	Cluster of | Neurospora crassa OR74A | Ku70/Ku80 family protein | protein | length=772 (NCU00077)	| Neurospora crassa OR74A | Ku70/Ku80 family protein | protein | length=772	NCU00077	Neurospora crassa OR74A_rev.fasta	86277.9	1	18	24	25	0.0012	0.303
Vince Research01272020	Uncategorized Sample	Vince	GPM22200021135	Cluster of | Neurospora crassa OR74A | INO80 chromatin remodeling complex | protein | length=750 (NCU01362)	| Neurospora crassa OR74A | INO80 chromatin remodeling complex | protein | length=750	NCU01362	Neurospora crassa OR74A_rev.fasta	83442.5	1	15	18	18	0.0008	0.303
Vince Research01272020	Uncategorized Sample	Vince	GPM22200021135	Cluster of | Neurospora crassa OR74A | 40S ribosomal protein S26E | protein | length=119 (NCU04552)	| Neurospora crassa OR74A | 40S ribosomal protein S26E | protein | length=119	NCU04552	Neurospora crassa OR74A_rev.fasta	13546.1	1	4	7	7	0.0003	0.303
Vince Research01272020	Uncategorized Sample	Vince	GPM22200021135	Cluster of | Neurospora crassa OR74A | ADP-ribosylation factor 1, ADP-ribosylation factor 1, variant 1 | protein | length=185 (NCU08340)	| Neurospora crassa OR74A | ADP-ribosylation factor 1, ADP-ribosylation factor 1, variant 1 | protein | length=185	NCU08340	Neurospora crassa OR74A_rev.fasta	20980	1	5	5	5	0.0002	0.303
Vince Research01272020	Uncategorized Sample	Vince	GPM22200021135	Cluster of | Neurospora crassa OR74A | importin subunit beta-1 | protein | length=876 (NCU02011)	| Neurospora crassa OR74A | importin subunit beta-1 | protein | length=876	NCU02011	Neurospora crassa OR74A_rev.fasta	96323.2	1	19	25	25	0.0012	0.301
Vince Research01272020	Uncategorized Sample	Vince	GPM22200021135	Cluster of | Neurospora crassa OR74A | Hyphal anastamosis-13 protein | protein | length=887 (NCU06265)	| Neurospora crassa OR74A | Hyphal anastamosis-13 protein | protein | length=887	NCU06265	Neurospora crassa OR74A_rev.fasta	98427.6	1	18	18	18	0.0008	0.301
Vince Research01272020	Uncategorized Sample	Vince	GPM22200021135	Cluster of | Neurospora crassa OR74A | hypothetical protein | protein | length=436 (NCU01257)	| Neurospora crassa OR74A | hypothetical protein | protein | length=436	NCU01257	Neurospora crassa OR74A_rev.fasta	48209.9	1	12	12	12	0.0006	0.3
Vince Research01272020	Uncategorized Sample	Vince	GPM22200021135	Cluster of | Neurospora crassa OR74A | 40S ribosomal protein S25 | protein | length=97 (NCU09476)	| Neurospora crassa OR74A | 40S ribosomal protein S25 | protein | length=97	NCU09476	Neurospora crassa OR74A_rev.fasta	10798.1	1	4	5	5	0.0002	0.299
Vince Research01272020	Uncategorized Sample	Vince	GPM22200021135	Cluster of | Neurospora crassa OR74A | proteasome regulatory particle | protein | length=492 (NCU03972)	| Neurospora crassa OR74A | proteasome regulatory particle | protein | length=492	NCU03972	Neurospora crassa OR74A_rev.fasta	54356	1	12	14	14	0.0007	0.297
Vince Research01272020	Uncategorized Sample	Vince	GPM22200021135	Cluster of | Neurospora crassa OR74A | 6-phosphofructokinase | protein | length=845 (NCU00629)	| Neurospora crassa OR74A | 6-phosphofructokinase | protein | length=845	NCU00629	Neurospora crassa OR74A_rev.fasta	92205.7	1	20	24	24	0.0011	0.295
Vince Research01272020	Uncategorized Sample	Vince	GPM22200021135	Cluster of | Neurospora crassa OR74A | mRNA surveillance-2 | protein | length=839 (NCU03435)	| Neurospora crassa OR74A | mRNA surveillance-2 | protein | length=839	NCU03435	Neurospora crassa OR74A_rev.fasta	88303.1	1	15	17	17	0.0008	0.294
Vince Research01272020	Uncategorized Sample	Vince	GPM22200021135	Cluster of | Neurospora crassa OR74A | small GTP-binding protein | protein | length=203 (NCU08477)	| Neurospora crassa OR74A | guanine triphosphate binding-10 | protein | length=205	NCU06404	Neurospora crassa OR74A_rev.fasta	22556.5	1	3	3	5	0.0002	0.293
Vince Research01272020	Uncategorized Sample	Vince	GPM22200021135	Cluster of | Neurospora crassa OR74A | 40S ribosomal protein S27 | protein | length=82 (NCU00618)	| Neurospora crassa OR74A | 40S ribosomal protein S27 | protein | length=82	NCU00618	Neurospora crassa OR74A_rev.fasta	8897.3	1	2	2	2	0.0001	0.293
Vince Research01272020	Uncategorized Sample	Vince	GPM22200021135	Cluster of | Neurospora crassa OR74A | T-complex protein 1 subunit beta | protein | length=557 (NCU09700)	| Neurospora crassa OR74A | T-complex protein 1 subunit beta | protein | length=557	NCU09700	Neurospora crassa OR74A_rev.fasta	60703.4	1	11	13	13	0.0006	0.291
Vince Research01272020	Uncategorized Sample	Vince	GPM22200021135	Cluster of | Neurospora crassa OR74A | Proteasome regulatory particle subunit | protein | length=381 (NCU02374)	| Neurospora crassa OR74A | Proteasome regulatory particle subunit | protein | length=381	NCU02374	Neurospora crassa OR74A_rev.fasta	43863.4	1	9	12	12	0.0006	0.291
Vince Research01272020	Uncategorized Sample	Vince	GPM22200021135	Cluster of | Neurospora crassa OR74A | acetate utilization-20 | protein | length=670 (NCU06785)	| Neurospora crassa OR74A | acetate utilization-20 | protein | length=670	NCU06785	Neurospora crassa OR74A_rev.fasta	72629.1	1	14	15	15	0.0007	0.288
Vince Research01272020	Uncategorized Sample	Vince	GPM22200021135	Cluster of | Neurospora crassa OR74A | orotidine-5'-phosphate decarboxylase Pyr-4 | protein | length=397 (NCU03488)	| Neurospora crassa OR74A | orotidine-5'-phosphate decarboxylase Pyr-4 | protein | length=397	NCU03488	Neurospora crassa OR74A_rev.fasta	43903.5	1	5	5	5	0.0002	0.287
Vince Research01272020	Uncategorized Sample	Vince	GPM22200021135	Cluster of | Neurospora crassa OR74A | hypothetical protein, hypothetical protein, variant 1 | protein | length=403 (NCU16448)	| Neurospora crassa OR74A | hypothetical protein, hypothetical protein, variant 1 | protein | length=403	NCU16448	Neurospora crassa OR74A_rev.fasta	44741.3	1	11	20	20	0.0009	0.285
Vince Research01272020	Uncategorized Sample	Vince	GPM22200021135	Cluster of | Neurospora crassa OR74A | mRNA surveillance-7 | protein | length=249 (NCU01793)	| Neurospora crassa OR74A | mRNA surveillance-7 | protein | length=249	NCU01793	Neurospora crassa OR74A_rev.fasta	25901.7	1	5	9	9	0.0004	0.285
Vince Research01272020	Uncategorized Sample	Vince	GPM22200021135	Cluster of | Neurospora crassa OR74A | chromatin remodeling complex subunit | protein | length=748 (NCU06238)	| Neurospora crassa OR74A | chromatin remodeling complex subunit | protein | length=748	NCU06238	Neurospora crassa OR74A_rev.fasta	83819.4	1	14	15	15	0.0007	0.282
Vince Research01272020	Uncategorized Sample	Vince	GPM22200021135	Cluster of | Neurospora crassa OR74A | importin alpha subunit | protein | length=548 (NCU01249)	| Neurospora crassa OR74A | importin alpha subunit | protein | length=548	NCU01249	Neurospora crassa OR74A_rev.fasta	59698.3	1	15	19	19	0.0009	0.281
Vince Research01272020	Uncategorized Sample	Vince	GPM22200021135	Cluster of | Neurospora crassa OR74A | peptide methionine sulfoxide reductase-1 | protein | length=203 (NCU10029)	| Neurospora crassa OR74A | peptide methionine sulfoxide reductase-1 | protein | length=203	NCU10029	Neurospora crassa OR74A_rev.fasta	23090.2	1	5	6	6	0.0003	0.281
Vince Research01272020	Uncategorized Sample	Vince	GPM22200021135	Cluster of | Neurospora crassa OR74A | tyrosine-protein phosphatase CDC14 | protein | length=654 (NCU03246)	| Neurospora crassa OR74A | tyrosine-protein phosphatase CDC14 | protein | length=654	NCU03246	Neurospora crassa OR74A_rev.fasta	72868.3	1	14	14	14	0.0007	0.278
Vince Research01272020	Uncategorized Sample	Vince	GPM22200021135	Cluster of | Neurospora crassa OR74A | heat shock protein 80 | protein | length=705 (NCU04142)	| Neurospora crassa OR74A | heat shock protein 80 | protein | length=705	NCU04142	Neurospora crassa OR74A_rev.fasta	80192.5	1	17	19	19	0.0009	0.275
Vince Research01272020	Uncategorized Sample	Vince	GPM22200021135	Cluster of | Neurospora crassa OR74A | pyruvate dehydrogenase E1 component | protein | length=379 (NCU03004)	| Neurospora crassa OR74A | pyruvate dehydrogenase E1 component | protein | length=379	NCU03004	Neurospora crassa OR74A_rev.fasta	40934.7	1	7	7	7	0.0003	0.274
Vince Research01272020	Uncategorized Sample	Vince	GPM22200021135	Cluster of | Neurospora crassa OR74A | cell division control protein Cdc48, cell division control protein Cdc48, variant 1 | protein | length=824 (NCU00018)	| Neurospora crassa OR74A | cell division control protein Cdc48, cell division control protein Cdc48, variant 1 | protein | length=824	NCU00018	Neurospora crassa OR74A_rev.fasta	90573.6	1	19	19	20	0.0009	0.271
Vince Research01272020	Uncategorized Sample	Vince	GPM22200021135	Cluster of | Neurospora crassa OR74A | cell wall-3 | protein | length=299 (NCU02658)	| Neurospora crassa OR74A | cell wall-3 | protein | length=299	NCU02658	Neurospora crassa OR74A_rev.fasta	33485.4	1	7	7	7	0.0003	0.271
Vince Research01272020	Uncategorized Sample	Vince	GPM22200021135	Cluster of | Neurospora crassa OR74A | cell division control protein 10 | protein | length=337 (NCU03515)	| Neurospora crassa OR74A | cell division control protein 10 | protein | length=337	NCU03515	Neurospora crassa OR74A_rev.fasta	38658.5	1	6	6	6	0.0003	0.27
Vince Research01272020	Uncategorized Sample	Vince	GPM22200021135	Cluster of | Neurospora crassa OR74A | coronin-6 | protein | length=606 (NCU00202)	| Neurospora crassa OR74A | coronin-6 | protein | length=606	NCU00202	Neurospora crassa OR74A_rev.fasta	66347.6	1	13	16	16	0.0008	0.269
Vince Research01272020	Uncategorized Sample	Vince	GPM22200021135	Cluster of | Neurospora crassa OR74A | casein kinase I isoform delta, casein kinase I isoform delta, variant 1, casein kinase I isoform delta, variant 2 | protein | length=361 (NCU00685)	| Neurospora crassa OR74A | casein kinase I isoform delta, casein kinase I isoform delta, variant 1, casein kinase I isoform delta, variant 2 | protein | length=361	NCU00685	Neurospora crassa OR74A_rev.fasta	41273.1	1	8	11	11	0.0005	0.269
Vince Research01272020	Uncategorized Sample	Vince	GPM22200021135	Cluster of | Neurospora crassa OR74A | eukaryotic translation initiation factor 3 | protein | length=872 (NCU07831)	| Neurospora crassa OR74A | eukaryotic translation initiation factor 3 | protein | length=872	NCU07831	Neurospora crassa OR74A_rev.fasta	98402	1	18	18	18	0.0008	0.268
Vince Research01272020	Uncategorized Sample	Vince	GPM22200021135	Cluster of | Neurospora crassa OR74A | ADP/ATP carrier protein, ADP/ATP carrier protein, variant 1 | protein | length=313 (NCU09477)	| Neurospora crassa OR74A | ADP/ATP carrier protein, ADP/ATP carrier protein, variant 1 | protein | length=313	NCU09477	Neurospora crassa OR74A_rev.fasta	33889.8	1	8	10	10	0.0005	0.268
Vince Research01272020	Uncategorized Sample	Vince	GPM22200021135	Cluster of | Neurospora crassa OR74A | chromatin remodeling complex subunit | protein | length=762 (NCU06394)	| Neurospora crassa OR74A | chromatin remodeling complex subunit | protein | length=762	NCU06394	Neurospora crassa OR74A_rev.fasta	86570.5	1	16	17	17	0.0008	0.266
Vince Research01272020	Uncategorized Sample	Vince	GPM22200021135	Cluster of | Neurospora crassa OR74A | actin-6 | protein | length=395 (NCU07171)	| Neurospora crassa OR74A | actin-6 | protein | length=395	NCU07171	Neurospora crassa OR74A_rev.fasta	44516	1	8	9	9	0.0004	0.266
Vince Research01272020	Uncategorized Sample	Vince	GPM22200021135	Cluster of | Neurospora crassa OR74A | homoisocitrate dehydrogenase | protein | length=402 (NCU02954)	| Neurospora crassa OR74A | homoisocitrate dehydrogenase | protein | length=402	NCU02954	Neurospora crassa OR74A_rev.fasta	43219.4	1	8	9	9	0.0004	0.264
Vince Research01272020	Uncategorized Sample	Vince	GPM22200021135	Cluster of | Neurospora crassa OR74A | histone acetyltransferase type B subunit 2 | protein | length=446 (NCU06679)	| Neurospora crassa OR74A | histone acetyltransferase type B subunit 2 | protein | length=446	NCU06679	Neurospora crassa OR74A_rev.fasta	50401.1	1	8	8	8	0.0004	0.262
Vince Research01272020	Uncategorized Sample	Vince	GPM22200021135	Cluster of | Neurospora crassa OR74A | eukaryotic translation initiation factor 3 subunit 2 | protein | length=346 (NCU03876)	| Neurospora crassa OR74A | eukaryotic translation initiation factor 3 subunit 2 | protein | length=346	NCU03876	Neurospora crassa OR74A_rev.fasta	38797.7	1	7	9	9	0.0004	0.26
Vince Research01272020	Uncategorized Sample	Vince	GPM22200021135	Cluster of | Neurospora crassa OR74A | eukaryotic translation initiation factor 6 | protein | length=246 (NCU09004)	| Neurospora crassa OR74A | eukaryotic translation initiation factor 6 | protein | length=246	NCU09004	Neurospora crassa OR74A_rev.fasta	26513.6	1	4	4	4	0.0002	0.26
Vince Research01272020	Uncategorized Sample	Vince	GPM22200021135	Cluster of | Neurospora crassa OR74A | ATP synthase subunit gamma | protein | length=299 (NCU09119)	| Neurospora crassa OR74A | ATP synthase subunit gamma | protein | length=299	NCU09119	Neurospora crassa OR74A_rev.fasta	32285.7	1	5	7	7	0.0003	0.258
Vince Research01272020	Uncategorized Sample	Vince	GPM22200021135	Cluster of | Neurospora crassa OR74A | initiation factor 5a | protein | length=163 (NCU05274)	| Neurospora crassa OR74A | initiation factor 5a | protein | length=163	NCU05274	Neurospora crassa OR74A_rev.fasta	18035.2	1	4	4	4	0.0002	0.258
Vince Research01272020	Uncategorized Sample	Vince	GPM22200021135	Cluster of | Neurospora crassa OR74A | hypothetical protein | protein | length=824 (NCU03461)	| Neurospora crassa OR74A | hypothetical protein | protein | length=824	NCU03461	Neurospora crassa OR74A_rev.fasta	86899	1	12	14	14	0.0007	0.252
Vince Research01272020	Uncategorized Sample	Vince	GPM22200021135	Cluster of | Neurospora crassa OR74A | map kinase kinase | protein | length=518 (NCU06419)	| Neurospora crassa OR74A | map kinase kinase | protein | length=518	NCU06419	Neurospora crassa OR74A_rev.fasta	55540	1	8	9	9	0.0004	0.251
Vince Research01272020	Uncategorized Sample	Vince	GPM22200021135	Cluster of | Neurospora crassa OR74A | 60S ribosomal protein L2 | protein | length=383 (NCU02757)	| Neurospora crassa OR74A | 60S ribosomal protein L2 | protein | length=383	NCU02757	Neurospora crassa OR74A_rev.fasta	42178.6	1	8	9	9	0.0004	0.251
Vince Research01272020	Uncategorized Sample	Vince	GPM22200021135	Cluster of | Neurospora crassa OR74A | hypothetical protein | protein | length=396 (NCU01485)	| Neurospora crassa OR74A | hypothetical protein | protein | length=396	NCU01485	Neurospora crassa OR74A_rev.fasta	45381.5	1	8	8	8	0.0004	0.25
Vince Research01272020	Uncategorized Sample	Vince	GPM22200021135	Cluster of | Neurospora crassa OR74A | 26S proteasome non-ATPase regulatory subunit 11 | protein | length=424 (NCU01596)	| Neurospora crassa OR74A | 26S proteasome non-ATPase regulatory subunit 11 | protein | length=424	NCU01596	Neurospora crassa OR74A_rev.fasta	47923.6	1	9	10	10	0.0005	0.248
Vince Research01272020	Uncategorized Sample	Vince	GPM22200021135	Cluster of | Neurospora crassa OR74A | nucleosome assembly protein | protein | length=407 (NCU01438)	| Neurospora crassa OR74A | nucleosome assembly protein | protein | length=407	NCU01438	Neurospora crassa OR74A_rev.fasta	46309.9	1	6	6	9	0.0004	0.248
Vince Research01272020	Uncategorized Sample	Vince	GPM22200021135	Cluster of | Neurospora crassa OR74A | 40S ribosomal protein S20 | protein | length=117 (NCU06892)	| Neurospora crassa OR74A | 40S ribosomal protein S20 | protein | length=117	NCU06892	Neurospora crassa OR74A_rev.fasta	13225.7	1	4	5	5	0.0002	0.248
Vince Research01272020	Uncategorized Sample	Vince	GPM22200021135	Cluster of | Neurospora crassa OR74A | hypothetical protein | protein | length=145 (NCU06788)	| Neurospora crassa OR74A | hypothetical protein | protein | length=145	NCU06788	Neurospora crassa OR74A_rev.fasta	16343.6	1	3	3	3	0.0001	0.248
Vince Research01272020	Uncategorized Sample	Vince	GPM22200021135	Cluster of | Neurospora crassa OR74A | paired amphipathic helix protein Sin3a, paired amphipathic helix protein Sin3a, variant 1 | protein | length=1490 (NCU02578)	| Neurospora crassa OR74A | paired amphipathic helix protein Sin3a, paired amphipathic helix protein Sin3a, variant 1 | protein | length=1490	NCU02578	Neurospora crassa OR74A_rev.fasta	167605	1	29	31	33	0.0016	0.246
Vince Research01272020	Uncategorized Sample	Vince	GPM22200021135	Cluster of | Neurospora crassa OR74A | porin-binding domain protein-3 | protein | length=690 (NCU08003)	| Neurospora crassa OR74A | porin-binding domain protein-3 | protein | length=690	NCU08003	Neurospora crassa OR74A_rev.fasta	74867.9	1	14	16	16	0.0008	0.246
Vince Research01272020	Uncategorized Sample	Vince	GPM22200021135	Cluster of | Neurospora crassa OR74A | CBF/NF-Y family transcription factor | protein | length=138 (NCU02017)	| Neurospora crassa OR74A | CBF/NF-Y family transcription factor | protein | length=138	NCU02017	Neurospora crassa OR74A_rev.fasta	15245.5	1	2	2	2	0.0001	0.246
Vince Research01272020	Uncategorized Sample	Vince	GPM22200021135	Cluster of | Neurospora crassa OR74A | DNA repair and recombination protein MUS53 | protein | length=1050 (NCU06264)	| Neurospora crassa OR74A | DNA repair and recombination protein MUS53 | protein | length=1050	NCU06264	Neurospora crassa OR74A_rev.fasta	119437	1	20	23	24	0.0011	0.244
Vince Research01272020	Uncategorized Sample	Vince	GPM22200021135	Cluster of | Neurospora crassa OR74A | hypothetical protein | protein | length=103 (NCU07057)	| Neurospora crassa OR74A | hypothetical protein | protein | length=103	NCU07057	Neurospora crassa OR74A_rev.fasta	11776.2	1	2	3	3	0.0001	0.243
Vince Research01272020	Uncategorized Sample	Vince	GPM22200021135	Cluster of | Neurospora crassa OR74A | RCM-1, RCM-1, variant 1 | protein | length=917 (NCU06842)	| Neurospora crassa OR74A | RCM-1, RCM-1, variant 1 | protein | length=917	NCU06842	Neurospora crassa OR74A_rev.fasta	102417	1	16	21	21	0.001	0.241
Vince Research01272020	Uncategorized Sample	Vince	GPM22200021135	Cluster of | Neurospora crassa OR74A | mitochondrial ribosomal protein subunit L23 | protein | length=228 (NCU08329)	| Neurospora crassa OR74A | mitochondrial ribosomal protein subunit L23 | protein | length=228	NCU08329	Neurospora crassa OR74A_rev.fasta	25967.3	1	3	3	3	0.0001	0.241
Vince Research01272020	Uncategorized Sample	Vince	GPM22200021135	Cluster of | Neurospora crassa OR74A | small nuclear ribonucleoprotein-14 | protein | length=116 (NCU03625)	| Neurospora crassa OR74A | small nuclear ribonucleoprotein-14 | protein | length=116	NCU03625	Neurospora crassa OR74A_rev.fasta	12770.9	1	3	3	3	0.0001	0.241
Vince Research01272020	Uncategorized Sample	Vince	GPM22200021135	Cluster of | Neurospora crassa OR74A | WD repeat-containing protein | protein | length=342 (NCU02753)	| Neurospora crassa OR74A | WD repeat-containing protein | protein | length=342	NCU02753	Neurospora crassa OR74A_rev.fasta	36849.6	1	6	6	6	0.0003	0.24
Vince Research01272020	Uncategorized Sample	Vince	GPM22200021135	Cluster of | Neurospora crassa OR74A | ribosome-associated protein | protein | length=290 (NCU03393)	| Neurospora crassa OR74A | ribosome-associated protein | protein | length=290	NCU03393	Neurospora crassa OR74A_rev.fasta	31500.9	1	8	12	12	0.0006	0.238
Vince Research01272020	Uncategorized Sample	Vince	GPM22200021135	Cluster of | Neurospora crassa OR74A | hypothetical protein | protein | length=214 (NCU03239)	| Neurospora crassa OR74A | hypothetical protein | protein | length=214	NCU03239	Neurospora crassa OR74A_rev.fasta	24458.2	1	5	7	7	0.0003	0.238
Vince Research01272020	Uncategorized Sample	Vince	GPM22200021135	Cluster of | Neurospora crassa OR74A | mitogen-activated protein kinase | protein | length=358 (NCU07024)	| Neurospora crassa OR74A | mitogen-activated protein kinase | protein | length=358	NCU07024	Neurospora crassa OR74A_rev.fasta	41245	1	5	5	5	0.0002	0.237
Vince Research01272020	Uncategorized Sample	Vince	GPM22200021135	Cluster of | Neurospora crassa OR74A | myosin regulatory light chain cdc4 | protein | length=139 (NCU06617)	| Neurospora crassa OR74A | myosin regulatory light chain cdc4 | protein | length=139	NCU06617	Neurospora crassa OR74A_rev.fasta	15525.8	1	3	3	3	0.0001	0.237
Vince Research01272020	Uncategorized Sample	Vince	GPM22200021135	Cluster of | Neurospora crassa OR74A | GTP cyclohydrolase 1 | protein | length=313 (NCU07774)	| Neurospora crassa OR74A | GTP cyclohydrolase 1 | protein | length=313	NCU07774	Neurospora crassa OR74A_rev.fasta	34471.7	1	4	4	4	0.0002	0.236
Vince Research01272020	Uncategorized Sample	Vince	GPM22200021135	Cluster of | Neurospora crassa OR74A | hypothetical protein | protein | length=237 (NCU00999)	| Neurospora crassa OR74A | hypothetical protein | protein | length=237	NCU00999	Neurospora crassa OR74A_rev.fasta	26429.1	1	3	3	3	0.0001	0.236
Vince Research01272020	Uncategorized Sample	Vince	GPM22200021135	Cluster of | Neurospora crassa OR74A | hypothetical protein | protein | length=748 (NCU00573)	| Neurospora crassa OR74A | hypothetical protein | protein | length=748	NCU00573	Neurospora crassa OR74A_rev.fasta	81668.1	1	16	19	19	0.0009	0.235
Vince Research01272020	Uncategorized Sample	Vince	GPM22200021135	Cluster of | Neurospora crassa OR74A | 26S proteasome non-ATPase regulatory subunit 8 | protein | length=289 (NCU10067)	| Neurospora crassa OR74A | 26S proteasome non-ATPase regulatory subunit 8 | protein | length=289	NCU10067	Neurospora crassa OR74A_rev.fasta	31913.5	1	5	5	5	0.0002	0.235
Vince Research01272020	Uncategorized Sample	Vince	GPM22200021135	Cluster of | Neurospora crassa OR74A | rRNA-processing protein utp23, rRNA-processing protein utp23, variant 1 | protein | length=320 (NCU02748)	| Neurospora crassa OR74A | rRNA-processing protein utp23, rRNA-processing protein utp23, variant 1 | protein | length=320	NCU02748	Neurospora crassa OR74A_rev.fasta	36207.3	1	6	6	6	0.0003	0.234
Vince Research01272020	Uncategorized Sample	Vince	GPM22200021135	Cluster of | Neurospora crassa OR74A | sulfur control-3 protein, sulfur control-3 protein, variant 1 | protein | length=171 (NCU08991)	| Neurospora crassa OR74A | sulfur control-3 protein, sulfur control-3 protein, variant 1 | protein | length=171	NCU08991	Neurospora crassa OR74A_rev.fasta	19910.5	1	3	4	4	0.0002	0.234
Vince Research01272020	Uncategorized Sample	Vince	GPM22200021135	Cluster of | Neurospora crassa OR74A | hypothetical protein | protein | length=218 (NCU03094)	| Neurospora crassa OR74A | hypothetical protein | protein | length=218	NCU03094	Neurospora crassa OR74A_rev.fasta	23145.2	1	3	3	3	0.0001	0.234
Vince Research01272020	Uncategorized Sample	Vince	GPM22200021135	Cluster of | Neurospora crassa OR74A | SNF2 family helicase/ATPase, SNF2 family helicase/ATPase, variant 1 | protein | length=1997 (NCU08919)	| Neurospora crassa OR74A | SNF2 family helicase/ATPase, SNF2 family helicase/ATPase, variant 1 | protein | length=1997	NCU08919	Neurospora crassa OR74A_rev.fasta	223080	1	33	39	40	0.0019	0.233
Vince Research01272020	Uncategorized Sample	Vince	GPM22200021135	Cluster of | Neurospora crassa OR74A | Fructose-2,6-bisphosphatase | protein | length=447 (NCU09347)	| Neurospora crassa OR74A | Fructose-2,6-bisphosphatase | protein | length=447	NCU09347	Neurospora crassa OR74A_rev.fasta	51451.5	1	8	8	8	0.0004	0.233
Vince Research01272020	Uncategorized Sample	Vince	GPM22200021135	Cluster of | Neurospora crassa OR74A | small nuclear ribonucleoprotein-22 | protein | length=90 (NCU01614)	| Neurospora crassa OR74A | small nuclear ribonucleoprotein-22 | protein | length=90	NCU01614	Neurospora crassa OR74A_rev.fasta	10335.1	1	2	2	2	0.0001	0.233
Vince Research01272020	Uncategorized Sample	Vince	GPM22200021135	Cluster of | Neurospora crassa OR74A | methionine synthase | protein | length=769 (NCU06512)	| Neurospora crassa OR74A | methionine synthase | protein | length=769	NCU06512	Neurospora crassa OR74A_rev.fasta	86313.5	1	13	15	15	0.0007	0.231
Vince Research01272020	Uncategorized Sample	Vince	GPM22200021135	Cluster of | Neurospora crassa OR74A | ribosome biogenesis-50 | protein | length=325 (NCU01524)	| Neurospora crassa OR74A | ribosome biogenesis-50 | protein | length=325	NCU01524	Neurospora crassa OR74A_rev.fasta	37119.5	1	8	10	10	0.0005	0.231
Vince Research01272020	Uncategorized Sample	Vince	GPM22200021135	Cluster of | Neurospora crassa OR74A | histone H2A.Z, histone H2A.Z, variant 1, histone H2A.Z, variant 2 | protein | length=143 (NCU05347)	| Neurospora crassa OR74A | histone H2A.Z, histone H2A.Z, variant 1, histone H2A.Z, variant 2 | protein | length=143	NCU05347	Neurospora crassa OR74A_rev.fasta	15288.2	1	3	4	4	0.0002	0.231
Vince Research01272020	Uncategorized Sample	Vince	GPM22200021135	Cluster of | Neurospora crassa OR74A | CP2 transcription factor, CP2 transcription factor, variant 1 | protein | length=797 (NCU06095)	| Neurospora crassa OR74A | CP2 transcription factor, CP2 transcription factor, variant 1 | protein | length=797	NCU06095	Neurospora crassa OR74A_rev.fasta	87656.9	1	14	16	16	0.0008	0.23
Vince Research01272020	Uncategorized Sample	Vince	GPM22200021135	Cluster of | Neurospora crassa OR74A | hypothetical protein, hypothetical protein, variant 1, hypothetical protein, variant 2 | protein | length=443 (NCU02316)	| Neurospora crassa OR74A | hypothetical protein, hypothetical protein, variant 1, hypothetical protein, variant 2 | protein | length=443	NCU02316	Neurospora crassa OR74A_rev.fasta	47554.7	1	8	10	10	0.0005	0.23
Vince Research01272020	Uncategorized Sample	Vince	GPM22200021135	Cluster of | Neurospora crassa OR74A | hypothetical protein | protein | length=419 (NCU06592)	| Neurospora crassa OR74A | hypothetical protein | protein | length=419	NCU06592	Neurospora crassa OR74A_rev.fasta	45879.2	1	8	9	9	0.0004	0.229
Vince Research01272020	Uncategorized Sample	Vince	GPM22200021135	Cluster of | Neurospora crassa OR74A | CYT-19 DEAD-box protein | protein | length=626 (NCU07670)	| Neurospora crassa OR74A | CYT-19 DEAD-box protein | protein | length=626	NCU07670	Neurospora crassa OR74A_rev.fasta	69399.3	1	11	11	11	0.0005	0.228
Vince Research01272020	Uncategorized Sample	Vince	GPM22200021135	Cluster of | Neurospora crassa OR74A | hypothetical protein | protein | length=394 (NCU03307)	| Neurospora crassa OR74A | hypothetical protein | protein | length=394	NCU03307	Neurospora crassa OR74A_rev.fasta	43416.9	1	7	8	8	0.0004	0.228
Vince Research01272020	Uncategorized Sample	Vince	GPM22200021135	Cluster of | Neurospora crassa OR74A | HSF-type DNA-binding domain-containing protein | protein | length=613 (NCU08480)	| Neurospora crassa OR74A | HSF-type DNA-binding domain-containing protein | protein | length=613	NCU08480	Neurospora crassa OR74A_rev.fasta	67217.1	1	7	7	8	0.0004	0.228
Vince Research01272020	Uncategorized Sample	Vince	GPM22200021135	Cluster of | Neurospora crassa OR74A | transketolase | protein | length=686 (NCU01328)	| Neurospora crassa OR74A | transketolase | protein | length=686	NCU01328	Neurospora crassa OR74A_rev.fasta	75160.1	1	12	15	15	0.0007	0.227
Vince Research01272020	Uncategorized Sample	Vince	GPM22200021135	Cluster of | Neurospora crassa OR74A | snRNP and snoRNP protein | protein | length=128 (NCU01331)	| Neurospora crassa OR74A | snRNP and snoRNP protein | protein | length=128	NCU01331	Neurospora crassa OR74A_rev.fasta	13792.8	1	2	2	2	0.0001	0.227
Vince Research01272020	Uncategorized Sample	Vince	GPM22200021135	Cluster of | Neurospora crassa OR74A | heat shock protein 88, heat shock protein 88, variant 1 | protein | length=707 (NCU05269)	| Neurospora crassa OR74A | heat shock protein 88, heat shock protein 88, variant 1 | protein | length=707	NCU05269	Neurospora crassa OR74A_rev.fasta	78675.1	1	12	13	13	0.0006	0.226
Vince Research01272020	Uncategorized Sample	Vince	GPM22200021135	Cluster of | Neurospora crassa OR74A | ATP-dependent RNA helicase mrh-4 | protein | length=625 (NCU06246)	| Neurospora crassa OR74A | ATP-dependent RNA helicase mrh-4 | protein | length=625	NCU06246	Neurospora crassa OR74A_rev.fasta	69259.7	1	11	11	11	0.0005	0.226
Vince Research01272020	Uncategorized Sample	Vince	GPM22200021135	Cluster of | Neurospora crassa OR74A | hypothetical protein | protein | length=580 (NCU05979)	| Neurospora crassa OR74A | hypothetical protein | protein | length=580	NCU05979	Neurospora crassa OR74A_rev.fasta	63793.4	1	8	8	8	0.0004	0.226
Vince Research01272020	Uncategorized Sample	Vince	GPM22200021135	Cluster of | Neurospora crassa OR74A | chromatin remodeling factor 5-1 | protein | length=907 (NCU06306)	| Neurospora crassa OR74A | chromatin remodeling factor 5-1 | protein | length=907	NCU06306	Neurospora crassa OR74A_rev.fasta	102575	1	14	17	18	0.0008	0.225
Vince Research01272020	Uncategorized Sample	Vince	GPM22200021135	Cluster of | Neurospora crassa OR74A | THO complex component | protein | length=2556 (NCU07002)	| Neurospora crassa OR74A | THO complex component | protein | length=2556	NCU07002	Neurospora crassa OR74A_rev.fasta	280048	1	40	47	47	0.0022	0.223
Vince Research01272020	Uncategorized Sample	Vince	GPM22200021135	Cluster of | Neurospora crassa OR74A | Chitin synthase | protein | length=917 (NCU03611)	| Neurospora crassa OR74A | Chitin synthase | protein | length=917	NCU03611	Neurospora crassa OR74A_rev.fasta	102696	1	13	13	13	0.0006	0.222
Vince Research01272020	Uncategorized Sample	Vince	GPM22200021135	Cluster of | Neurospora crassa OR74A | 60S ribosomal protein L20 | protein | length=225 (NCU04225)	| Neurospora crassa OR74A | 60S ribosomal protein L20 | protein | length=225	NCU04225	Neurospora crassa OR74A_rev.fasta	25397.3	1	2	2	2	0.0001	0.222
Vince Research01272020	Uncategorized Sample	Vince	GPM22200021135	Cluster of | Neurospora crassa OR74A | enolase, enolase, variant 1 | protein | length=438 (NCU10042)	| Neurospora crassa OR74A | enolase, enolase, variant 1 | protein | length=438	NCU10042	Neurospora crassa OR74A_rev.fasta	47595.3	1	8	8	8	0.0004	0.221
Vince Research01272020	Uncategorized Sample	Vince	GPM22200021135	Cluster of | Neurospora crassa OR74A | heat shock protein 60 | protein | length=574 (NCU01589)	| Neurospora crassa OR74A | heat shock protein 60 | protein | length=574	NCU01589	Neurospora crassa OR74A_rev.fasta	60490.3	1	9	9	9	0.0004	0.22
Vince Research01272020	Uncategorized Sample	Vince	GPM22200021135	Cluster of | Neurospora crassa OR74A | TEM1 | protein | length=314 (NCU08878)	| Neurospora crassa OR74A | TEM1 | protein | length=314	NCU08878	Neurospora crassa OR74A_rev.fasta	35052.4	1	4	4	4	0.0002	0.22
Vince Research01272020	Uncategorized Sample	Vince	GPM22200021135	Cluster of | Neurospora crassa OR74A | eukaryotic translation initiation factor 3 | protein | length=384 (NCU08046)	| Neurospora crassa OR74A | eukaryotic translation initiation factor 3 | protein | length=384	NCU08046	Neurospora crassa OR74A_rev.fasta	41950	1	5	5	5	0.0002	0.219
Vince Research01272020	Uncategorized Sample	Vince	GPM22200021135	Cluster of | Neurospora crassa OR74A | conidial separation-1 | protein | length=287 (NCU02713)	| Neurospora crassa OR74A | conidial separation-1 | protein | length=287	NCU02713	Neurospora crassa OR74A_rev.fasta	31209.2	1	5	5	5	0.0002	0.216
Vince Research01272020	Uncategorized Sample	Vince	GPM22200021135	Cluster of | Neurospora crassa OR74A | hypothetical protein | protein | length=438 (NCU08518)	| Neurospora crassa OR74A | hypothetical protein | protein | length=438	NCU08518	Neurospora crassa OR74A_rev.fasta	48644.1	1	8	9	9	0.0004	0.215
Vince Research01272020	Uncategorized Sample	Vince	GPM22200021135	Cluster of | Neurospora crassa OR74A | hypothetical protein | protein | length=497 (NCU05970)	| Neurospora crassa OR74A | hypothetical protein | protein | length=497	NCU05970	Neurospora crassa OR74A_rev.fasta	55112.8	1	6	8	8	0.0004	0.215
Vince Research01272020	Uncategorized Sample	Vince	GPM22200021135	Cluster of | Neurospora crassa OR74A | hypothetical protein | protein | length=429 (NCU08421)	| Neurospora crassa OR74A | hypothetical protein | protein | length=429	NCU08421	Neurospora crassa OR74A_rev.fasta	46201.3	1	6	6	12	0.0006	0.214
Vince Research01272020	Uncategorized Sample	Vince	GPM22200021135	Cluster of | Neurospora crassa OR74A | ribosomal protein S28, ribosomal protein S28, variant 1 | protein | length=145 (NCU01552)	| Neurospora crassa OR74A | ribosomal protein S28, ribosomal protein S28, variant 1 | protein | length=145	NCU01552	Neurospora crassa OR74A_rev.fasta	15909.9	1	6	7	8	0.0004	0.214
Vince Research01272020	Uncategorized Sample	Vince	GPM22200021135	Cluster of | Neurospora crassa OR74A | transcription factor-8 | protein | length=437 (NCU02739)	| Neurospora crassa OR74A | transcription factor-8 | protein | length=437	NCU02739	Neurospora crassa OR74A_rev.fasta	48254.4	1	6	6	6	0.0003	0.213
Vince Research01272020	Uncategorized Sample	Vince	GPM22200021135	Cluster of | Neurospora crassa OR74A | 60S ribosomal protein L40, 60S ribosomal protein L40, variant 1 | protein | length=52 (NCU05032)	| Neurospora crassa OR74A | 60S ribosomal protein L40, 60S ribosomal protein L40, variant 1 | protein | length=52	NCU05032	Neurospora crassa OR74A_rev.fasta	6075.8	1	5	13	14	0.0007	0.212
Vince Research01272020	Uncategorized Sample	Vince	GPM22200021135	Cluster of | Neurospora crassa OR74A | RNA polymerase-20 | protein | length=146 (NCU09378)	| Neurospora crassa OR74A | RNA polymerase-20 | protein | length=146	NCU09378	Neurospora crassa OR74A_rev.fasta	16440.3	1	2	2	2	0.0001	0.212
Vince Research01272020	Uncategorized Sample	Vince	GPM22200021135	Cluster of | Neurospora crassa OR74A | Plasma membrane ATPase | protein | length=920 (NCU01680)	| Neurospora crassa OR74A | Plasma membrane ATPase | protein | length=920	NCU01680	Neurospora crassa OR74A_rev.fasta	99888.3	1	15	16	16	0.0008	0.211
Vince Research01272020	Uncategorized Sample	Vince	GPM22200021135	Cluster of | Neurospora crassa OR74A | nucleolar protein 4 | protein | length=772 (NCU06217)	| Neurospora crassa OR74A | nucleolar protein 4 | protein | length=772	NCU06217	Neurospora crassa OR74A_rev.fasta	87224.6	1	14	14	14	0.0007	0.211
Vince Research01272020	Uncategorized Sample	Vince	GPM22200021135	Cluster of | Neurospora crassa OR74A | hypothetical protein | protein | length=555 (NCU07855)	| Neurospora crassa OR74A | hypothetical protein | protein | length=555	NCU07855	Neurospora crassa OR74A_rev.fasta	60540.9	1	9	11	11	0.0005	0.211
Vince Research01272020	Uncategorized Sample	Vince	GPM22200021135	Cluster of | Neurospora crassa OR74A | eukaryotic translation initiation factor 2 gamma subunit | protein | length=511 (NCU02810)	| Neurospora crassa OR74A | eukaryotic translation initiation factor 2 gamma subunit | protein | length=511	NCU02810	Neurospora crassa OR74A_rev.fasta	55438.8	1	8	9	9	0.0004	0.211
Vince Research01272020	Uncategorized Sample	Vince	GPM22200021135	Cluster of | Neurospora crassa OR74A | ribosomal L1 domain-containing protein 1 | protein | length=388 (NCU11321)	| Neurospora crassa OR74A | ribosomal L1 domain-containing protein 1 | protein | length=388	NCU11321	Neurospora crassa OR74A_rev.fasta	42784.1	1	7	7	7	0.0003	0.211
Vince Research01272020	Uncategorized Sample	Vince	GPM22200021135	Cluster of | Neurospora crassa OR74A | disulfide isomerase-2 | protein | length=813 (NCU06344)	| Neurospora crassa OR74A | disulfide isomerase-2 | protein | length=813	NCU06344	Neurospora crassa OR74A_rev.fasta	91193.8	1	15	15	15	0.0007	0.21
Vince Research01272020	Uncategorized Sample	Vince	GPM22200021135	Cluster of | Neurospora crassa OR74A | curved DNA-binding protein, curved DNA-binding protein, variant 1 | protein | length=410 (NCU00422)	| Neurospora crassa OR74A | curved DNA-binding protein, curved DNA-binding protein, variant 1 | protein | length=410	NCU00422	Neurospora crassa OR74A_rev.fasta	44777.2	1	6	6	6	0.0003	0.21
Vince Research01272020	Uncategorized Sample	Vince	GPM22200021135	Cluster of | Neurospora crassa OR74A | THO complex subunit Tho1 | protein | length=868 (NCU07865)	| Neurospora crassa OR74A | THO complex subunit Tho1 | protein | length=868	NCU07865	Neurospora crassa OR74A_rev.fasta	96894.1	1	14	16	16	0.0008	0.209
Vince Research01272020	Uncategorized Sample	Vince	GPM22200021135	Cluster of | Neurospora crassa OR74A | ribosome biogenesis-58 | protein | length=183 (NCU00105)	| Neurospora crassa OR74A | ribosome biogenesis-58 | protein | length=183	NCU00105	Neurospora crassa OR74A_rev.fasta	20455.6	1	3	4	4	0.0002	0.208
Vince Research01272020	Uncategorized Sample	Vince	GPM22200021135	Cluster of Cationic trypsin OS=Bos taurus PE=1 SV=3 (sp|P00760|TRY1_BOVIN)	Cationic trypsin OS=Bos taurus PE=1 SV=3	sp|P00760|TRY1_BOVIN	Neurospora crassa OR74A_rev.fasta	25785.3	1	15	16	16	0.0008	0.207
Vince Research01272020	Uncategorized Sample	Vince	GPM22200021135	Cluster of | Neurospora crassa OR74A | TATA-binding protein | protein | length=257 (NCU04770)	| Neurospora crassa OR74A | TATA-binding protein | protein | length=257	NCU04770	Neurospora crassa OR74A_rev.fasta	27580	1	3	6	7	0.0003	0.206
Vince Research01272020	Uncategorized Sample	Vince	GPM22200021135	Cluster of | Neurospora crassa OR74A | heat shock protein 40-1 | protein | length=423 (NCU00465)	| Neurospora crassa OR74A | heat shock protein 40-1 | protein | length=423	NCU00465	Neurospora crassa OR74A_rev.fasta	46538	1	6	7	7	0.0003	0.206
Vince Research01272020	Uncategorized Sample	Vince	GPM22200021135	Cluster of | Neurospora crassa OR74A | Pyruvate kinase, pyruvate kinase, variant 1 | protein | length=527 (NCU06075)	| Neurospora crassa OR74A | Pyruvate kinase, pyruvate kinase, variant 1 | protein | length=527	NCU06075	Neurospora crassa OR74A_rev.fasta	57871.4	1	7	7	7	0.0003	0.205
Vince Research01272020	Uncategorized Sample	Vince	GPM22200021135	Cluster of | Neurospora crassa OR74A | zinc finger transcription factor-22 | protein | length=362 (NCU03206)	| Neurospora crassa OR74A | zinc finger transcription factor-22 | protein | length=362	NCU03206	Neurospora crassa OR74A_rev.fasta	40069.3	1	7	8	9	0.0004	0.204
Vince Research01272020	Uncategorized Sample	Vince	GPM22200021135	Cluster of | Neurospora crassa OR74A | pentose glucuronate interconversion-2 | protein | length=521 (NCU02797)	| Neurospora crassa OR74A | pentose glucuronate interconversion-2 | protein | length=521	NCU02797	Neurospora crassa OR74A_rev.fasta	58192.5	1	9	9	9	0.0004	0.202
Vince Research01272020	Uncategorized Sample	Vince	GPM22200021135	Cluster of | Neurospora crassa OR74A | ATP-dependent RNA helicase MSS116 | protein | length=696 (NCU01104)	| Neurospora crassa OR74A | ATP-dependent RNA helicase MSS116 | protein | length=696	NCU01104	Neurospora crassa OR74A_rev.fasta	74482.1	1	10	11	11	0.0005	0.201
Vince Research01272020	Uncategorized Sample	Vince	GPM22200021135	Cluster of | Neurospora crassa OR74A | pyruvate dehydrogenase complex | protein | length=458 (NCU07659)	| Neurospora crassa OR74A | pyruvate dehydrogenase complex | protein | length=458	NCU07659	Neurospora crassa OR74A_rev.fasta	48620	1	6	6	6	0.0003	0.201
Vince Research01272020	Uncategorized Sample	Vince	GPM22200021135	Cluster of | Neurospora crassa OR74A | actin-related protein-13 | protein | length=169 (NCU01918)	| Neurospora crassa OR74A | actin-related protein-13 | protein | length=169	NCU01918	Neurospora crassa OR74A_rev.fasta	19653.7	1	3	3	3	0.0001	0.201
Vince Research01272020	Uncategorized Sample	Vince	GPM22200021135	Cluster of | Neurospora crassa OR74A | hypothetical protein | protein | length=1029 (NCU03360)	| Neurospora crassa OR74A | hypothetical protein | protein | length=1029	NCU03360	Neurospora crassa OR74A_rev.fasta	113249	1	13	14	14	0.0007	0.2
Vince Research01272020	Uncategorized Sample	Vince	GPM22200021135	Cluster of | Neurospora crassa OR74A | hypothetical protein | protein | length=210 (NCU06395)	| Neurospora crassa OR74A | hypothetical protein | protein | length=210	NCU06395	Neurospora crassa OR74A_rev.fasta	22148.4	1	3	3	3	0.0001	0.2
Vince Research01272020	Uncategorized Sample	Vince	GPM22200021135	Cluster of | Neurospora crassa OR74A | 26S proteasome non-ATPase regulatory subunit 3 | protein | length=552 (NCU02224)	| Neurospora crassa OR74A | 26S proteasome non-ATPase regulatory subunit 3 | protein | length=552	NCU02224	Neurospora crassa OR74A_rev.fasta	61631.6	1	8	8	8	0.0004	0.199
Vince Research01272020	Uncategorized Sample	Vince	GPM22200021135	Cluster of | Neurospora crassa OR74A | eIF4A | protein | length=397 (NCU07420)	| Neurospora crassa OR74A | eIF4A | protein | length=397	NCU07420	Neurospora crassa OR74A_rev.fasta	44845.4	1	6	6	6	0.0003	0.199
Vince Research01272020	Uncategorized Sample	Vince	GPM22200021135	Cluster of | Neurospora crassa OR74A | myosin-2 | protein | length=1594 (NCU01440)	| Neurospora crassa OR74A | myosin-2 | protein | length=1594	NCU01440	Neurospora crassa OR74A_rev.fasta	181022	1	24	25	25	0.0012	0.198
Vince Research01272020	Uncategorized Sample	Vince	GPM22200021135	Cluster of | Neurospora crassa OR74A | hypothetical protein | protein | length=570 (NCU01599)	| Neurospora crassa OR74A | hypothetical protein | protein | length=570	NCU01599	Neurospora crassa OR74A_rev.fasta	63262.1	1	10	10	11	0.0005	0.198
Vince Research01272020	Uncategorized Sample	Vince	GPM22200021135	Cluster of | Neurospora crassa OR74A | hypothetical protein | protein | length=458 (NCU07112)	| Neurospora crassa OR74A | hypothetical protein | protein | length=458	NCU07112	Neurospora crassa OR74A_rev.fasta	49035.8	1	5	5	5	0.0002	0.197
Vince Research01272020	Uncategorized Sample	Vince	GPM22200021135	Cluster of | Neurospora crassa OR74A | 50S ribosomal protein L17 | protein | length=193 (NCU01023)	| Neurospora crassa OR74A | 50S ribosomal protein L17 | protein | length=193	NCU01023	Neurospora crassa OR74A_rev.fasta	22139.5	1	3	3	3	0.0001	0.197
Vince Research01272020	Uncategorized Sample	Vince	GPM22200021135	Cluster of | Neurospora crassa OR74A | trehalose-phosphatase | protein | length=1015 (NCU05041)	| Neurospora crassa OR74A | trehalose-phosphatase | protein | length=1015	NCU05041	Neurospora crassa OR74A_rev.fasta	112906	1	13	13	13	0.0006	0.196
Vince Research01272020	Uncategorized Sample	Vince	GPM22200021135	Cluster of | Neurospora crassa OR74A | centromere/microtubule-binding protein cbf5 | protein | length=480 (NCU01290)	| Neurospora crassa OR74A | centromere/microtubule-binding protein cbf5 | protein | length=480	NCU01290	Neurospora crassa OR74A_rev.fasta	52880.3	1	6	6	6	0.0003	0.196
Vince Research01272020	Uncategorized Sample	Vince	GPM22200021135	Cluster of | Neurospora crassa OR74A | FACT complex subunit pob-3 | protein | length=565 (NCU00133)	| Neurospora crassa OR74A | FACT complex subunit pob-3 | protein | length=565	NCU00133	Neurospora crassa OR74A_rev.fasta	62911.6	1	8	8	8	0.0004	0.195
Vince Research01272020	Uncategorized Sample	Vince	GPM22200021135	Cluster of | Neurospora crassa OR74A | proteasome component Y13 | protein | length=251 (NCU05942)	| Neurospora crassa OR74A | proteasome component Y13 | protein | length=251	NCU05942	Neurospora crassa OR74A_rev.fasta	27935.8	1	4	5	5	0.0002	0.195
Vince Research01272020	Uncategorized Sample	Vince	GPM22200021135	Cluster of | Neurospora crassa OR74A | caleosin domain-containing protein | protein | length=299 (NCU09043)	| Neurospora crassa OR74A | caleosin domain-containing protein | protein | length=299	NCU09043	Neurospora crassa OR74A_rev.fasta	34186.4	1	4	5	5	0.0002	0.194
Vince Research01272020	Uncategorized Sample	Vince	GPM22200021135	Cluster of | Neurospora crassa OR74A | Ras-2 protein | protein | length=229 (NCU03616)	| Neurospora crassa OR74A | Ras-2 protein | protein | length=229	NCU03616	Neurospora crassa OR74A_rev.fasta	25349.7	1	2	2	2	0.0001	0.192
Vince Research01272020	Uncategorized Sample	Vince	GPM22200021135	Cluster of | Neurospora crassa OR74A | DNA-dependent RNA polymerase II RPB140 | protein | length=1287 (NCU05120)	| Neurospora crassa OR74A | DNA-dependent RNA polymerase II RPB140 | protein | length=1287	NCU05120	Neurospora crassa OR74A_rev.fasta	145408	1	20	22	22	0.001	0.191
Vince Research01272020	Uncategorized Sample	Vince	GPM22200021135	Cluster of | Neurospora crassa OR74A | DnaJ family protein | protein | length=414 (NCU07414)	| Neurospora crassa OR74A | DnaJ family protein | protein | length=414	NCU07414	Neurospora crassa OR74A_rev.fasta	45317.2	1	8	9	9	0.0004	0.191
Vince Research01272020	Uncategorized Sample	Vince	GPM22200021135	Cluster of | Neurospora crassa OR74A | Mitogen activated protein kinase kinase 2, variant | protein | length=392 (NCU04612)	| Neurospora crassa OR74A | Mitogen activated protein kinase kinase 2, variant | protein | length=392	NCU04612	Neurospora crassa OR74A_rev.fasta	43911.4	1	5	6	6	0.0003	0.191
Vince Research01272020	Uncategorized Sample	Vince	GPM22200021135	Cluster of | Neurospora crassa OR74A | hypothetical protein | protein | length=420 (NCU06539)	| Neurospora crassa OR74A | hypothetical protein | protein | length=420	NCU06539	Neurospora crassa OR74A_rev.fasta	43931.9	1	4	4	4	0.0002	0.19
Vince Research01272020	Uncategorized Sample	Vince	GPM22200021135	Cluster of | Neurospora crassa OR74A | 60S ribosomal protein L19 | protein | length=158 (NCU04336)	| Neurospora crassa OR74A | 60S ribosomal protein L19 | protein | length=158	NCU04336	Neurospora crassa OR74A_rev.fasta	16603.4	1	2	2	2	0.0001	0.19
Vince Research01272020	Uncategorized Sample	Vince	GPM22200021135	Cluster of | Neurospora crassa OR74A | nucleolar essential protein 1, nucleolar essential protein 1, variant 1 | protein | length=265 (NCU02428)	| Neurospora crassa OR74A | nucleolar essential protein 1, nucleolar essential protein 1, variant 1 | protein | length=265	NCU02428	Neurospora crassa OR74A_rev.fasta	29271.4	1	3	3	3	0.0001	0.189
Vince Research01272020	Uncategorized Sample	Vince	GPM22200021135	Cluster of | Neurospora crassa OR74A | FK506-binding protein 4 | protein | length=467 (NCU03241)	| Neurospora crassa OR74A | FK506-binding protein 4 | protein | length=467	NCU03241	Neurospora crassa OR74A_rev.fasta	50775.6	1	10	11	11	0.0005	0.186
Vince Research01272020	Uncategorized Sample	Vince	GPM22200021135	Cluster of | Neurospora crassa OR74A | rRNA processing protein Rrp8 | protein | length=548 (NCU05293)	| Neurospora crassa OR74A | rRNA processing protein Rrp8 | protein | length=548	NCU05293	Neurospora crassa OR74A_rev.fasta	59769.4	1	7	7	7	0.0003	0.186
Vince Research01272020	Uncategorized Sample	Vince	GPM22200021135	Cluster of | Neurospora crassa OR74A | coatomer subunit delta | protein | length=512 (NCU00493)	| Neurospora crassa OR74A | coatomer subunit delta | protein | length=512	NCU00493	Neurospora crassa OR74A_rev.fasta	56705	1	7	7	7	0.0003	0.186
Vince Research01272020	Uncategorized Sample	Vince	GPM22200021135	Cluster of | Neurospora crassa OR74A | transcription factor-21 | protein | length=532 (NCU02724)	| Neurospora crassa OR74A | transcription factor-21 | protein | length=532	NCU02724	Neurospora crassa OR74A_rev.fasta	57100.1	1	7	7	7	0.0003	0.186
Vince Research01272020	Uncategorized Sample	Vince	GPM22200021135	Cluster of | Neurospora crassa OR74A | UDP-glucose 4-epimerase Gal10 | protein | length=152 (NCU08030)	| Neurospora crassa OR74A | UDP-glucose 4-epimerase Gal10 | protein | length=152	NCU08030	Neurospora crassa OR74A_rev.fasta	17161.1	1	3	3	3	0.0001	0.184
Vince Research01272020	Uncategorized Sample	Vince	GPM22200021135	Cluster of | Neurospora crassa OR74A | Histidinol-phosphate aminotransferase | protein | length=401 (NCU06360)	| Neurospora crassa OR74A | Histidinol-phosphate aminotransferase | protein | length=401	NCU06360	Neurospora crassa OR74A_rev.fasta	43584	1	6	6	6	0.0003	0.182
Vince Research01272020	Uncategorized Sample	Vince	GPM22200021135	Cluster of | Neurospora crassa OR74A | ribosome biogenesis-49 | protein | length=341 (NCU08595)	| Neurospora crassa OR74A | ribosome biogenesis-49 | protein | length=341	NCU08595	Neurospora crassa OR74A_rev.fasta	38898	1	5	5	5	0.0002	0.182
Vince Research01272020	Uncategorized Sample	Vince	GPM22200021135	Cluster of | Neurospora crassa OR74A | hypothetical protein | protein | length=930 (NCU02012)	| Neurospora crassa OR74A | hypothetical protein | protein | length=930	NCU02012	Neurospora crassa OR74A_rev.fasta	102986	1	13	13	13	0.0006	0.181
Vince Research01272020	Uncategorized Sample	Vince	GPM22200021135	Cluster of | Neurospora crassa OR74A | hypothetical protein, hypothetical protein, variant 1 | protein | length=287 (NCU08550)	| Neurospora crassa OR74A | hypothetical protein, hypothetical protein, variant 1 | protein | length=287	NCU08550	Neurospora crassa OR74A_rev.fasta	31723.9	1	4	4	4	0.0002	0.181
Vince Research01272020	Uncategorized Sample	Vince	GPM22200021135	Cluster of | Neurospora crassa OR74A | ssDNA binding protein, ssDNA binding protein, variant 1 | protein | length=222 (NCU00137)	| Neurospora crassa OR74A | ssDNA binding protein, ssDNA binding protein, variant 1 | protein | length=222	NCU00137	Neurospora crassa OR74A_rev.fasta	25040.1	1	4	4	4	0.0002	0.18
Vince Research01272020	Uncategorized Sample	Vince	GPM22200021135	Cluster of | Neurospora crassa OR74A | CVNH domain-containing protein | protein | length=111 (NCU05495)	| Neurospora crassa OR74A | CVNH domain-containing protein | protein | length=111	NCU05495	Neurospora crassa OR74A_rev.fasta	12922.2	1	2	2	2	0.0001	0.18
Vince Research01272020	Uncategorized Sample	Vince	GPM22200021135	Cluster of | Neurospora crassa OR74A | hypothetical protein, hypothetical protein, variant 1 | protein | length=1354 (NCU01283)	| Neurospora crassa OR74A | hypothetical protein, hypothetical protein, variant 1 | protein | length=1354	NCU01283	Neurospora crassa OR74A_rev.fasta	143181	1	12	13	13	0.0006	0.179
Vince Research01272020	Uncategorized Sample	Vince	GPM22200021135	Cluster of | Neurospora crassa OR74A | Pyruvate decarboxylase, pyruvate decarboxylase, variant 1 | protein | length=570 (NCU02193)	| Neurospora crassa OR74A | Pyruvate decarboxylase, pyruvate decarboxylase, variant 1 | protein | length=570	NCU02193	Neurospora crassa OR74A_rev.fasta	62263.4	1	8	9	9	0.0004	0.179
Vince Research01272020	Uncategorized Sample	Vince	GPM22200021135	Cluster of | Neurospora crassa OR74A | mitochondrial phosphate carrier protein | protein | length=319 (NCU05390)	| Neurospora crassa OR74A | mitochondrial phosphate carrier protein | protein | length=319	NCU05390	Neurospora crassa OR74A_rev.fasta	33321.6	1	4	4	4	0.0002	0.179
Vince Research01272020	Uncategorized Sample	Vince	GPM22200021135	Cluster of | Neurospora crassa OR74A | hypothetical protein, hypothetical protein, variant 1, hypothetical protein, variant 2 | protein | length=95 (NCU09995)	| Neurospora crassa OR74A | hypothetical protein, hypothetical protein, variant 1, hypothetical protein, variant 2 | protein | length=95	NCU09995	Neurospora crassa OR74A_rev.fasta	10748.5	1	2	3	3	0.0001	0.179
Vince Research01272020	Uncategorized Sample	Vince	GPM22200021135	Cluster of | Neurospora crassa OR74A | hypothetical protein, hypothetical protein, variant 1 | protein | length=399 (NCU01534)	| Neurospora crassa OR74A | hypothetical protein, hypothetical protein, variant 1 | protein | length=399	NCU01534	Neurospora crassa OR74A_rev.fasta	43884.6	1	4	6	6	0.0003	0.178
Vince Research01272020	Uncategorized Sample	Vince	GPM22200021135	Cluster of | Neurospora crassa OR74A | nucleolar protein 12 | protein | length=594 (NCU09131)	| Neurospora crassa OR74A | nucleolar protein 12 | protein | length=594	NCU09131	Neurospora crassa OR74A_rev.fasta	64700.6	1	11	16	16	0.0008	0.177
Vince Research01272020	Uncategorized Sample	Vince	GPM22200021135	Cluster of | Neurospora crassa OR74A | eukaryotic translation initiation factor 3 110 kDa subunit | protein | length=1059 (NCU00040)	| Neurospora crassa OR74A | eukaryotic translation initiation factor 3 110 kDa subunit | protein | length=1059	NCU00040	Neurospora crassa OR74A_rev.fasta	120247	1	13	13	13	0.0006	0.176
Vince Research01272020	Uncategorized Sample	Vince	GPM22200021135	Cluster of | Neurospora crassa OR74A | zinc finger transcription factor-34 | protein | length=449 (NCU05285)	| Neurospora crassa OR74A | zinc finger transcription factor-34 | protein | length=449	NCU05285	Neurospora crassa OR74A_rev.fasta	47888.8	1	6	8	8	0.0004	0.176
Vince Research01272020	Uncategorized Sample	Vince	GPM22200021135	Cluster of | Neurospora crassa OR74A | glutaminyl-peptide cyclotransferase-1 | protein | length=426 (NCU11249)	| Neurospora crassa OR74A | glutaminyl-peptide cyclotransferase-1 | protein | length=426	NCU11249	Neurospora crassa OR74A_rev.fasta	47097.9	1	5	5	5	0.0002	0.176
Vince Research01272020	Uncategorized Sample	Vince	GPM22200021135	Cluster of | Neurospora crassa OR74A | RNA splicing factor Pad-1 | protein | length=571 (NCU03491)	| Neurospora crassa OR74A | RNA splicing factor Pad-1 | protein | length=571	NCU03491	Neurospora crassa OR74A_rev.fasta	64500.8	1	7	7	7	0.0003	0.175
Vince Research01272020	Uncategorized Sample	Vince	GPM22200021135	Cluster of | Neurospora crassa OR74A | hypothetical protein | protein | length=909 (NCU09401)	| Neurospora crassa OR74A | hypothetical protein | protein | length=909	NCU09401	Neurospora crassa OR74A_rev.fasta	104309	1	12	13	13	0.0006	0.174
Vince Research01272020	Uncategorized Sample	Vince	GPM22200021135	Cluster of | Neurospora crassa OR74A | T-complex protein 1 | protein | length=533 (NCU02839)	| Neurospora crassa OR74A | T-complex protein 1 | protein | length=533	NCU02839	Neurospora crassa OR74A_rev.fasta	56810	1	6	6	6	0.0003	0.173
Vince Research01272020	Uncategorized Sample	Vince	GPM22200021135	Cluster of | Neurospora crassa OR74A | hypothetical protein, hypothetical protein, variant 1 | protein | length=323 (NCU04843)	| Neurospora crassa OR74A | hypothetical protein, hypothetical protein, variant 1 | protein | length=323	NCU04843	Neurospora crassa OR74A_rev.fasta	32214.5	1	2	2	2	0.0001	0.173
Vince Research01272020	Uncategorized Sample	Vince	GPM22200021135	Cluster of | Neurospora crassa OR74A | hypothetical protein | protein | length=419 (NCU03858)	| Neurospora crassa OR74A | hypothetical protein | protein | length=419	NCU03858	Neurospora crassa OR74A_rev.fasta	45835.8	1	6	7	7	0.0003	0.172
Vince Research01272020	Uncategorized Sample	Vince	GPM22200021135	Cluster of | Neurospora crassa OR74A | histone h4-2 | protein | length=163 (NCU04338)	| Neurospora crassa OR74A | histone h4-2 | protein | length=163	NCU04338	Neurospora crassa OR74A_rev.fasta	17692.9	1	3	3	3	0.0001	0.172
Vince Research01272020	Uncategorized Sample	Vince	GPM22200021135	Cluster of | Neurospora crassa OR74A | COPII-coated vesicle protein SurF4/Erv29 | protein | length=302 (NCU03319)	| Neurospora crassa OR74A | COPII-coated vesicle protein SurF4/Erv29 | protein | length=302	NCU03319	Neurospora crassa OR74A_rev.fasta	33812.2	1	2	2	2	0.0001	0.172
Vince Research01272020	Uncategorized Sample	Vince	GPM22200021135	Cluster of | Neurospora crassa OR74A | hypothetical protein | protein | length=1388 (NCU08417)	| Neurospora crassa OR74A | hypothetical protein | protein | length=1388	NCU08417	Neurospora crassa OR74A_rev.fasta	152770	1	16	18	20	0.0009	0.171
Vince Research01272020	Uncategorized Sample	Vince	GPM22200021135	Cluster of | Neurospora crassa OR74A | proteasome component PUP2 | protein | length=245 (NCU05295)	| Neurospora crassa OR74A | proteasome component PUP2 | protein | length=245	NCU05295	Neurospora crassa OR74A_rev.fasta	26874.7	1	3	3	3	0.0001	0.171
Vince Research01272020	Uncategorized Sample	Vince	GPM22200021135	Cluster of | Neurospora crassa OR74A | elongation factor 3 | protein | length=1056 (NCU07922)	| Neurospora crassa OR74A | elongation factor 3 | protein | length=1056	NCU07922	Neurospora crassa OR74A_rev.fasta	117113	1	15	15	15	0.0007	0.17
Vince Research01272020	Uncategorized Sample	Vince	GPM22200021135	Cluster of | Neurospora crassa OR74A | Mitogen-activated protein kinase 2, variant | protein | length=352 (NCU02393)	| Neurospora crassa OR74A | Mitogen-activated protein kinase 2, variant | protein | length=352	NCU02393	Neurospora crassa OR74A_rev.fasta	40843.6	1	4	4	4	0.0002	0.168
Vince Research01272020	Uncategorized Sample	Vince	GPM22200021135	Cluster of | Neurospora crassa OR74A | meiotic expression up-regulated protein 14 | protein | length=339 (NCU02540)	| Neurospora crassa OR74A | meiotic expression up-regulated protein 14 | protein | length=339	NCU02540	Neurospora crassa OR74A_rev.fasta	37128.3	1	3	4	4	0.0002	0.168
Vince Research01272020	Uncategorized Sample	Vince	GPM22200021135	Cluster of | Neurospora crassa OR74A | eukaryotic translation initiation factor 2 beta subunit, eukaryotic translation initiation factor 2 beta subunit, variant 1 | protein | length=323 (NCU04640)	| Neurospora crassa OR74A | eukaryotic translation initiation factor 2 beta subunit, eukaryotic translation initiation factor 2 beta subunit, variant 1 | protein | length=323	NCU04640	Neurospora crassa OR74A_rev.fasta	35533.2	1	3	3	3	0.0001	0.167
Vince Research01272020	Uncategorized Sample	Vince	GPM22200021135	Cluster of | Neurospora crassa OR74A | T-complex protein 1 subunit alpha | protein | length=566 (NCU04448)	| Neurospora crassa OR74A | T-complex protein 1 subunit alpha | protein | length=566	NCU04448	Neurospora crassa OR74A_rev.fasta	61440.3	1	8	9	9	0.0004	0.166
Vince Research01272020	Uncategorized Sample	Vince	GPM22200021135	Cluster of | Neurospora crassa OR74A | chromatin remodeling complex subunit | protein | length=751 (NCU08840)	| Neurospora crassa OR74A | chromatin remodeling complex subunit | protein | length=751	NCU08840	Neurospora crassa OR74A_rev.fasta	81510.7	1	7	7	7	0.0003	0.165
Vince Research01272020	Uncategorized Sample	Vince	GPM22200021135	Cluster of | Neurospora crassa OR74A | hypothetical protein | protein | length=955 (NCU02720)	| Neurospora crassa OR74A | hypothetical protein | protein | length=955	NCU02720	Neurospora crassa OR74A_rev.fasta	103620	1	9	12	12	0.0006	0.164
Vince Research01272020	Uncategorized Sample	Vince	GPM22200021135	Cluster of | Neurospora crassa OR74A | hypothetical protein | protein | length=678 (NCU02026)	| Neurospora crassa OR74A | hypothetical protein | protein | length=678	NCU02026	Neurospora crassa OR74A_rev.fasta	72315.1	1	6	6	6	0.0003	0.164
Vince Research01272020	Uncategorized Sample	Vince	GPM22200021135	Cluster of | Neurospora crassa OR74A | exonuclease Kem1 | protein | length=1450 (NCU06678)	| Neurospora crassa OR74A | exonuclease Kem1 | protein | length=1450	NCU06678	Neurospora crassa OR74A_rev.fasta	163379	1	16	18	18	0.0008	0.163
Vince Research01272020	Uncategorized Sample	Vince	GPM22200021135	Cluster of | Neurospora crassa OR74A | eukaryotic translation initiation factor 3 | protein | length=747 (NCU02208)	| Neurospora crassa OR74A | eukaryotic translation initiation factor 3 | protein | length=747	NCU02208	Neurospora crassa OR74A_rev.fasta	85566.7	1	8	8	8	0.0004	0.163
Vince Research01272020	Uncategorized Sample	Vince	GPM22200021135	Cluster of | Neurospora crassa OR74A | sphingosine-1-phosphate lyase | protein | length=576 (NCU06761)	| Neurospora crassa OR74A | sphingosine-1-phosphate lyase | protein | length=576	NCU06761	Neurospora crassa OR74A_rev.fasta	63521	1	7	7	7	0.0003	0.163
Vince Research01272020	Uncategorized Sample	Vince	GPM22200021135	Cluster of | Neurospora crassa OR74A | Adenosylhomocysteinase, adenosylhomocysteinase, variant 1 | protein | length=449 (NCU07930)	| Neurospora crassa OR74A | Adenosylhomocysteinase, adenosylhomocysteinase, variant 1 | protein | length=449	NCU07930	Neurospora crassa OR74A_rev.fasta	49080.9	1	6	7	7	0.0003	0.163
Vince Research01272020	Uncategorized Sample	Vince	GPM22200021135	Cluster of | Neurospora crassa OR74A | transcription elongation complex subunit | protein | length=1032 (NCU01164)	| Neurospora crassa OR74A | transcription elongation complex subunit | protein | length=1032	NCU01164	Neurospora crassa OR74A_rev.fasta	118062	1	15	17	17	0.0008	0.162
Vince Research01272020	Uncategorized Sample	Vince	GPM22200021135	Cluster of | Neurospora crassa OR74A | transcription factor-28 | protein | length=1093 (NCU09894)	| Neurospora crassa OR74A | transcription factor-28 | protein | length=1093	NCU09894	Neurospora crassa OR74A_rev.fasta	121505	1	13	13	13	0.0006	0.162
Vince Research01272020	Uncategorized Sample	Vince	GPM22200021135	Cluster of | Neurospora crassa OR74A | MADS box protein | protein | length=224 (NCU07430)	| Neurospora crassa OR74A | MADS box protein | protein | length=224	NCU07430	Neurospora crassa OR74A_rev.fasta	24315.8	1	2	3	3	0.0001	0.161
Vince Research01272020	Uncategorized Sample	Vince	GPM22200021135	Cluster of | Neurospora crassa OR74A | Histone H3 | protein | length=155 (NCU00145)	| Neurospora crassa OR74A | Histone H3 | protein | length=155	NCU00145	Neurospora crassa OR74A_rev.fasta	17337.7	1	1	1	2	0.0001	0.161
Vince Research01272020	Uncategorized Sample	Vince	GPM22200021135	Cluster of | Neurospora crassa OR74A | mitochondrial 60S ribosomal protein L25 | protein | length=163 (NCU02804)	| Neurospora crassa OR74A | mitochondrial 60S ribosomal protein L25 | protein | length=163	NCU02804	Neurospora crassa OR74A_rev.fasta	18835.5	1	2	2	2	0.0001	0.16
Vince Research01272020	Uncategorized Sample	Vince	GPM22200021135	Cluster of | Neurospora crassa OR74A | small nuclear ribonucleoprotein-13 | protein | length=119 (NCU03778)	| Neurospora crassa OR74A | small nuclear ribonucleoprotein-13 | protein | length=119	NCU03778	Neurospora crassa OR74A_rev.fasta	13518.2	1	2	2	2	0.0001	0.16
Vince Research01272020	Uncategorized Sample	Vince	GPM22200021135	Cluster of | Neurospora crassa OR74A | DNA repair-13 | protein | length=1111 (NCU05246)	| Neurospora crassa OR74A | DNA repair-13 | protein | length=1111	NCU05246	Neurospora crassa OR74A_rev.fasta	124291	1	13	15	16	0.0008	0.159
Vince Research01272020	Uncategorized Sample	Vince	GPM22200021135	Cluster of | Neurospora crassa OR74A | Phosphatidylethanolamine N-methyltransferase | protein | length=965 (NCU08045)	| Neurospora crassa OR74A | Phosphatidylethanolamine N-methyltransferase | protein | length=965	NCU08045	Neurospora crassa OR74A_rev.fasta	109554	1	10	11	11	0.0005	0.159
Vince Research01272020	Uncategorized Sample	Vince	GPM22200021135	Cluster of | Neurospora crassa OR74A | aspartokinase-1 | protein | length=522 (NCU04118)	| Neurospora crassa OR74A | aspartokinase-1 | protein | length=522	NCU04118	Neurospora crassa OR74A_rev.fasta	57004.6	1	6	6	6	0.0003	0.159
Vince Research01272020	Uncategorized Sample	Vince	GPM22200021135	Cluster of | Neurospora crassa OR74A | hypothetical protein | protein | length=321 (NCU01259)	| Neurospora crassa OR74A | hypothetical protein | protein | length=321	NCU01259	Neurospora crassa OR74A_rev.fasta	36114.1	1	3	4	4	0.0002	0.159
Vince Research01272020	Uncategorized Sample	Vince	GPM22200021135	Cluster of | Neurospora crassa OR74A | serine/threonine protein kinase Kin1 | protein | length=869 (NCU04747)	| Neurospora crassa OR74A | serine/threonine protein kinase Kin1 | protein | length=869	NCU04747	Neurospora crassa OR74A_rev.fasta	97199.6	1	11	14	14	0.0007	0.158
Vince Research01272020	Uncategorized Sample	Vince	GPM22200021135	Cluster of | Neurospora crassa OR74A | DnaJ domain-containing protein | protein | length=337 (NCU17061)	| Neurospora crassa OR74A | DnaJ domain-containing protein | protein | length=337	NCU17061	Neurospora crassa OR74A_rev.fasta	36928.7	1	4	5	5	0.0002	0.157
Vince Research01272020	Uncategorized Sample	Vince	GPM22200021135	Cluster of | Neurospora crassa OR74A | DNA-directed RNA polymerase II polypeptide | protein | length=337 (NCU01515)	| Neurospora crassa OR74A | DNA-directed RNA polymerase II polypeptide | protein | length=337	NCU01515	Neurospora crassa OR74A_rev.fasta	37101.6	1	3	3	3	0.0001	0.157
Vince Research01272020	Uncategorized Sample	Vince	GPM22200021135	Cluster of | Neurospora crassa OR74A | mitochondrial ribosomal protein-72 | protein | length=1798 (NCU06272)	| Neurospora crassa OR74A | mitochondrial ribosomal protein-72 | protein | length=1798	NCU06272	Neurospora crassa OR74A_rev.fasta	196073	1	24	25	25	0.0012	0.155
Vince Research01272020	Uncategorized Sample	Vince	GPM22200021135	Cluster of | Neurospora crassa OR74A | phenol monooxygenase-1 | protein | length=656 (NCU03023)	| Neurospora crassa OR74A | phenol monooxygenase-1 | protein | length=656	NCU03023	Neurospora crassa OR74A_rev.fasta	73472.1	1	8	8	8	0.0004	0.155
Vince Research01272020	Uncategorized Sample	Vince	GPM22200021135	Cluster of | Neurospora crassa OR74A | hypothetical protein, hypothetical protein, variant 1 | protein | length=168 (NCU01145)	| Neurospora crassa OR74A | hypothetical protein, hypothetical protein, variant 1 | protein | length=168	NCU01145	Neurospora crassa OR74A_rev.fasta	17364.1	1	3	5	5	0.0002	0.155
Vince Research01272020	Uncategorized Sample	Vince	GPM22200021135	Cluster of | Neurospora crassa OR74A | thiamine-4, thiamine-4, variant 1 | protein | length=538 (NCU07849)	| Neurospora crassa OR74A | thiamine-4, thiamine-4, variant 1 | protein | length=538	NCU07849	Neurospora crassa OR74A_rev.fasta	58431.7	1	6	7	7	0.0003	0.154
Vince Research01272020	Uncategorized Sample	Vince	GPM22200021135	Cluster of | Neurospora crassa OR74A | eukaryotic translation initiation factor 3 subunit M | protein | length=434 (NCU02813)	| Neurospora crassa OR74A | eukaryotic translation initiation factor 3 subunit M | protein | length=434	NCU02813	Neurospora crassa OR74A_rev.fasta	49703.9	1	5	5	5	0.0002	0.154
Vince Research01272020	Uncategorized Sample	Vince	GPM22200021135	Cluster of | Neurospora crassa OR74A | hypothetical protein | protein | length=201 (NCU01650)	| Neurospora crassa OR74A | hypothetical protein | protein | length=201	NCU01650	Neurospora crassa OR74A_rev.fasta	22693.8	1	2	2	2	0.0001	0.154
Vince Research01272020	Uncategorized Sample	Vince	GPM22200021135	Cluster of | Neurospora crassa OR74A | non-anchored cell wall protein 1 | protein | length=691 (NCU05137)	| Neurospora crassa OR74A | non-anchored cell wall protein 1 | protein | length=691	NCU05137	Neurospora crassa OR74A_rev.fasta	75679.9	1	7	9	9	0.0004	0.153
Vince Research01272020	Uncategorized Sample	Vince	GPM22200021135	Cluster of | Neurospora crassa OR74A | AP-1 complex subunit mu | protein | length=448 (NCU09688)	| Neurospora crassa OR74A | AP-1 complex subunit mu | protein | length=448	NCU09688	Neurospora crassa OR74A_rev.fasta	50669	1	5	5	5	0.0002	0.152
Vince Research01272020	Uncategorized Sample	Vince	GPM22200021135	Cluster of | Neurospora crassa OR74A | UV-endonuclease UVE-1 | protein | length=710 (NCU08850)	| Neurospora crassa OR74A | UV-endonuclease UVE-1 | protein | length=710	NCU08850	Neurospora crassa OR74A_rev.fasta	80457.5	1	8	8	8	0.0004	0.151
Vince Research01272020	Uncategorized Sample	Vince	GPM22200021135	Cluster of | Neurospora crassa OR74A | RNA binding protein Jsn1 | protein | length=1208 (NCU06199)	| Neurospora crassa OR74A | RNA binding protein Jsn1 | protein | length=1208	NCU06199	Neurospora crassa OR74A_rev.fasta	130612	1	11	11	11	0.0005	0.15
Vince Research01272020	Uncategorized Sample	Vince	GPM22200021135	Cluster of | Neurospora crassa OR74A | endoplasmic reticulum-Golgi intermediate compartment protein 3 | protein | length=444 (NCU08607)	| Neurospora crassa OR74A | endoplasmic reticulum-Golgi intermediate compartment protein 3 | protein | length=444	NCU08607	Neurospora crassa OR74A_rev.fasta	49151.1	1	5	6	6	0.0003	0.149
Vince Research01272020	Uncategorized Sample	Vince	GPM22200021135	Cluster of | Neurospora crassa OR74A | 50S ribosomal subunit L30 | protein | length=368 (NCU07560)	| Neurospora crassa OR74A | 50S ribosomal subunit L30 | protein | length=368	NCU07560	Neurospora crassa OR74A_rev.fasta	41256.7	1	4	4	4	0.0002	0.149
Vince Research01272020	Uncategorized Sample	Vince	GPM22200021135	Cluster of | Neurospora crassa OR74A | hypothetical protein | protein | length=369 (NCU02159)	| Neurospora crassa OR74A | hypothetical protein | protein | length=369	NCU02159	Neurospora crassa OR74A_rev.fasta	40039.3	1	3	3	3	0.0001	0.149
Vince Research01272020	Uncategorized Sample	Vince	GPM22200021135	Cluster of | Neurospora crassa OR74A | RNA-binding protein | protein | length=488 (NCU04273)	| Neurospora crassa OR74A | RNA-binding protein | protein | length=488	NCU04273	Neurospora crassa OR74A_rev.fasta	53929	1	6	8	8	0.0004	0.148
Vince Research01272020	Uncategorized Sample	Vince	GPM22200021135	Cluster of | Neurospora crassa OR74A | hypothetical protein | protein | length=372 (NCU09527)	| Neurospora crassa OR74A | hypothetical protein | protein | length=372	NCU09527	Neurospora crassa OR74A_rev.fasta	40731	1	4	4	4	0.0002	0.148
Vince Research01272020	Uncategorized Sample	Vince	GPM22200021135	Cluster of | Neurospora crassa OR74A | ubiquinol-cytochrome c reductase iron-sulfur subunit | protein | length=231 (NCU06606)	| Neurospora crassa OR74A | ubiquinol-cytochrome c reductase iron-sulfur subunit | protein | length=231	NCU06606	Neurospora crassa OR74A_rev.fasta	24771	1	2	2	2	0.0001	0.147
Vince Research01272020	Uncategorized Sample	Vince	GPM22200021135	Cluster of | Neurospora crassa OR74A | nucleolar GTP-binding protein 1 | protein | length=666 (NCU05289)	| Neurospora crassa OR74A | nucleolar GTP-binding protein 1 | protein | length=666	NCU05289	Neurospora crassa OR74A_rev.fasta	75561.9	1	8	8	8	0.0004	0.146
Vince Research01272020	Uncategorized Sample	Vince	GPM22200021135	Cluster of | Neurospora crassa OR74A | 60S ribosomal protein L3 | protein | length=384 (NCU06749)	| Neurospora crassa OR74A | 60S ribosomal protein L3 | protein | length=384	NCU06749	Neurospora crassa OR74A_rev.fasta	41199.2	1	4	4	4	0.0002	0.146
Vince Research01272020	Uncategorized Sample	Vince	GPM22200021135	Cluster of | Neurospora crassa OR74A | zinc finger transcription factor-17 | protein | length=517 (NCU03975)	| Neurospora crassa OR74A | zinc finger transcription factor-17 | protein | length=517	NCU03975	Neurospora crassa OR74A_rev.fasta	54158.2	1	6	11	11	0.0005	0.145
Vince Research01272020	Uncategorized Sample	Vince	GPM22200021135	Cluster of | Neurospora crassa OR74A | hypothetical protein | protein | length=531 (NCU06090)	| Neurospora crassa OR74A | hypothetical protein | protein | length=531	NCU06090	Neurospora crassa OR74A_rev.fasta	59656.3	1	6	7	7	0.0003	0.145
Vince Research01272020	Uncategorized Sample	Vince	GPM22200021135	Cluster of | Neurospora crassa OR74A | mitochondrial citrate synthase | protein | length=469 (NCU01692)	| Neurospora crassa OR74A | mitochondrial citrate synthase | protein | length=469	NCU01692	Neurospora crassa OR74A_rev.fasta	51989.9	1	5	5	6	0.0003	0.145
Vince Research01272020	Uncategorized Sample	Vince	GPM22200021135	Cluster of | Neurospora crassa OR74A | histone deacetylase RPD3 | protein | length=658 (NCU00824)	| Neurospora crassa OR74A | histone deacetylase RPD3 | protein | length=658	NCU00824	Neurospora crassa OR74A_rev.fasta	72264.2	1	6	7	7	0.0003	0.144
Vince Research01272020	Uncategorized Sample	Vince	GPM22200021135	Cluster of | Neurospora crassa OR74A | pre-mRNA splicing factor | protein | length=611 (NCU02716)	| Neurospora crassa OR74A | pre-mRNA splicing factor | protein | length=611	NCU02716	Neurospora crassa OR74A_rev.fasta	65109.6	1	6	6	6	0.0003	0.144
Vince Research01272020	Uncategorized Sample	Vince	GPM22200021135	Cluster of | Neurospora crassa OR74A | Fructose-bisphosphate aldolase, fructose-bisphosphate aldolase, variant 1 | protein | length=362 (NCU07807)	| Neurospora crassa OR74A | Fructose-bisphosphate aldolase, fructose-bisphosphate aldolase, variant 1 | protein | length=362	NCU07807	Neurospora crassa OR74A_rev.fasta	39890.1	1	4	5	5	0.0002	0.144
Vince Research01272020	Uncategorized Sample	Vince	GPM22200021135	Cluster of | Neurospora crassa OR74A | cytoplasmic ribosomal protein-88 | protein | length=209 (NCU01301)	| Neurospora crassa OR74A | cytoplasmic ribosomal protein-88 | protein | length=209	NCU01301	Neurospora crassa OR74A_rev.fasta	23130.9	1	2	2	2	0.0001	0.144
Vince Research01272020	Uncategorized Sample	Vince	GPM22200021135	Cluster of | Neurospora crassa OR74A | succinyl-CoA ligase beta-chain | protein | length=447 (NCU08471)	| Neurospora crassa OR74A | succinyl-CoA ligase beta-chain | protein | length=447	NCU08471	Neurospora crassa OR74A_rev.fasta	48211.9	1	6	6	6	0.0003	0.143
Vince Research01272020	Uncategorized Sample	Vince	GPM22200021135	Cluster of | Neurospora crassa OR74A | zinc-containing alcohol dehydrogenase | protein | length=346 (NCU09285)	| Neurospora crassa OR74A | zinc-containing alcohol dehydrogenase | protein | length=346	NCU09285	Neurospora crassa OR74A_rev.fasta	37295.6	1	5	5	5	0.0002	0.142
Vince Research01272020	Uncategorized Sample	Vince	GPM22200021135	Cluster of | Neurospora crassa OR74A | eukaryotic translation initiation factor 3 subunit 6 | protein | length=443 (NCU05889)	| Neurospora crassa OR74A | eukaryotic translation initiation factor 3 subunit 6 | protein | length=443	NCU05889	Neurospora crassa OR74A_rev.fasta	51051.4	1	4	4	4	0.0002	0.142
Vince Research01272020	Uncategorized Sample	Vince	GPM22200021135	Cluster of | Neurospora crassa OR74A | fungal specific transcription factor | protein | length=1176 (NCU06799)	| Neurospora crassa OR74A | fungal specific transcription factor | protein | length=1176	NCU06799	Neurospora crassa OR74A_rev.fasta	125831	1	10	10	10	0.0005	0.141
Vince Research01272020	Uncategorized Sample	Vince	GPM22200021135	Cluster of | Neurospora crassa OR74A | DNA-directed RNA polymerase II polypeptide | protein | length=234 (NCU05305)	| Neurospora crassa OR74A | DNA-directed RNA polymerase II polypeptide | protein | length=234	NCU05305	Neurospora crassa OR74A_rev.fasta	26562.8	1	4	5	5	0.0002	0.141
Vince Research01272020	Uncategorized Sample	Vince	GPM22200021135	Cluster of | Neurospora crassa OR74A | transcription elongation factor spt-6 | protein | length=1407 (NCU04611)	| Neurospora crassa OR74A | transcription elongation factor spt-6 | protein | length=1407	NCU04611	Neurospora crassa OR74A_rev.fasta	163439	1	17	17	17	0.0008	0.14
Vince Research01272020	Uncategorized Sample	Vince	GPM22200021135	Cluster of | Neurospora crassa OR74A | protein kinase gsk3, protein kinase gsk3, variant 1 | protein | length=394 (NCU04185)	| Neurospora crassa OR74A | protein kinase gsk3, protein kinase gsk3, variant 1 | protein | length=394	NCU04185	Neurospora crassa OR74A_rev.fasta	45131.6	1	5	5	5	0.0002	0.14
Vince Research01272020	Uncategorized Sample	Vince	GPM22200021135	Cluster of | Neurospora crassa OR74A | pyruvate dehydrogenase E1 component alpha subunit | protein | length=417 (NCU06482)	| Neurospora crassa OR74A | pyruvate dehydrogenase E1 component alpha subunit | protein | length=417	NCU06482	Neurospora crassa OR74A_rev.fasta	46140	1	6	6	6	0.0003	0.139
Vince Research01272020	Uncategorized Sample	Vince	GPM22200021135	Cluster of | Neurospora crassa OR74A | ubiquitin terminal hydrolase-2 | protein | length=331 (NCU03704)	| Neurospora crassa OR74A | ubiquitin terminal hydrolase-2 | protein | length=331	NCU03704	Neurospora crassa OR74A_rev.fasta	37062.8	1	3	3	3	0.0001	0.139
Vince Research01272020	Uncategorized Sample	Vince	GPM22200021135	Cluster of | Neurospora crassa OR74A | DNA-directed RNA polymerase I and III polypeptide | protein | length=378 (NCU02533)	| Neurospora crassa OR74A | DNA-directed RNA polymerase I and III polypeptide | protein | length=378	NCU02533	Neurospora crassa OR74A_rev.fasta	42876.1	1	4	4	4	0.0002	0.138
Vince Research01272020	Uncategorized Sample	Vince	GPM22200021135	Cluster of Immunoglobulin G-binding protein G OS=Streptococcus sp. group G GN=spg PE=1 SV=1 (sp|P19909|SPG2_STRSG)	Immunoglobulin G-binding protein G OS=Streptococcus sp. group G GN=spg PE=1 SV=1	sp|P19909|SPG2_STRSG	Neurospora crassa OR74A_rev.fasta	63293	1	3	3	3	0.0001	0.138
Vince Research01272020	Uncategorized Sample	Vince	GPM22200021135	Cluster of | Neurospora crassa OR74A | hir-1 | protein | length=1035 (NCU04035)	| Neurospora crassa OR74A | hir-1 | protein | length=1035	NCU04035	Neurospora crassa OR74A_rev.fasta	112440	1	11	11	11	0.0005	0.137
Vince Research01272020	Uncategorized Sample	Vince	GPM22200021135	Cluster of | Neurospora crassa OR74A | guanine triphosphate binding-14 | protein | length=205 (NCU03711)	| Neurospora crassa OR74A | guanine triphosphate binding-14 | protein | length=205	NCU03711	Neurospora crassa OR74A_rev.fasta	23128.4	1	2	2	2	0.0001	0.137
Vince Research01272020	Uncategorized Sample	Vince	GPM22200021135	Cluster of | Neurospora crassa OR74A | hypothetical protein, hypothetical protein, variant 1, hypothetical protein, variant 2 | protein | length=667 (NCU11000)	| Neurospora crassa OR74A | hypothetical protein, hypothetical protein, variant 1, hypothetical protein, variant 2 | protein | length=667	NCU11000	Neurospora crassa OR74A_rev.fasta	70401.4	1	7	8	8	0.0004	0.136
Vince Research01272020	Uncategorized Sample	Vince	GPM22200021135	Cluster of | Neurospora crassa OR74A | Cullin-3 | protein | length=838 (NCU02498)	| Neurospora crassa OR74A | Cullin-3 | protein | length=838	NCU02498	Neurospora crassa OR74A_rev.fasta	96209	1	9	9	9	0.0004	0.135
Vince Research01272020	Uncategorized Sample	Vince	GPM22200021135	Cluster of | Neurospora crassa OR74A | eukaryotic translation initiation factor 2 alpha subunit | protein | length=310 (NCU08277)	| Neurospora crassa OR74A | eukaryotic translation initiation factor 2 alpha subunit | protein | length=310	NCU08277	Neurospora crassa OR74A_rev.fasta	35300.6	1	4	4	4	0.0002	0.135
Vince Research01272020	Uncategorized Sample	Vince	GPM22200021135	Cluster of | Neurospora crassa OR74A | 60S ribosomal protein L4, 60S ribosomal protein L4, variant 1 | protein | length=325 (NCU01474)	| Neurospora crassa OR74A | 60S ribosomal protein L4, 60S ribosomal protein L4, variant 1 | protein | length=325	NCU01474	Neurospora crassa OR74A_rev.fasta	36345.9	1	4	4	4	0.0002	0.135
Vince Research01272020	Uncategorized Sample	Vince	GPM22200021135	Cluster of | Neurospora crassa OR74A | hsp20-like protein | protein | length=215 (NCU09420)	| Neurospora crassa OR74A | hsp20-like protein | protein | length=215	NCU09420	Neurospora crassa OR74A_rev.fasta	24176.8	1	3	4	4	0.0002	0.135
Vince Research01272020	Uncategorized Sample	Vince	GPM22200021135	Cluster of | Neurospora crassa OR74A | RNase III domain-containing protein | protein | length=267 (NCU09826)	| Neurospora crassa OR74A | RNase III domain-containing protein | protein | length=267	NCU09826	Neurospora crassa OR74A_rev.fasta	29586.9	1	3	3	3	0.0001	0.135
Vince Research01272020	Uncategorized Sample	Vince	GPM22200021135	Cluster of | Neurospora crassa OR74A | pre-mRNA splicing factor ATP-dependent RNA helicase PRP43 | protein | length=774 (NCU01612)	| Neurospora crassa OR74A | pre-mRNA splicing factor ATP-dependent RNA helicase PRP43 | protein | length=774	NCU01612	Neurospora crassa OR74A_rev.fasta	87803.4	1	7	9	9	0.0004	0.134
Vince Research01272020	Uncategorized Sample	Vince	GPM22200021135	Cluster of | Neurospora crassa OR74A | polarity-defective 6, polarity-defective 6, variant 1, polarity-defective 6, variant 2 | protein | length=928 (NCU11235)	| Neurospora crassa OR74A | polarity-defective 6, polarity-defective 6, variant 1, polarity-defective 6, variant 2 | protein | length=928	NCU11235	Neurospora crassa OR74A_rev.fasta	101120	1	7	7	7	0.0003	0.134
Vince Research01272020	Uncategorized Sample	Vince	GPM22200021135	Cluster of | Neurospora crassa OR74A | sulfate adenylyltransferase | protein | length=573 (NCU01985)	| Neurospora crassa OR74A | sulfate adenylyltransferase | protein | length=573	NCU01985	Neurospora crassa OR74A_rev.fasta	64462.8	1	5	5	5	0.0002	0.134
Vince Research01272020	Uncategorized Sample	Vince	GPM22200021135	Cluster of | Neurospora crassa OR74A | nucleolar protein 16 | protein | length=232 (NCU09528)	| Neurospora crassa OR74A | nucleolar protein 16 | protein | length=232	NCU09528	Neurospora crassa OR74A_rev.fasta	26062.1	1	3	3	3	0.0001	0.134
Vince Research01272020	Uncategorized Sample	Vince	GPM22200021135	Cluster of | Neurospora crassa OR74A | Nop10 family nucleolar RNA-binding protein | protein | length=67 (NCU08903)	| Neurospora crassa OR74A | Nop10 family nucleolar RNA-binding protein | protein | length=67	NCU08903	Neurospora crassa OR74A_rev.fasta	7691.3	1	2	2	2	0.0001	0.134
Vince Research01272020	Uncategorized Sample	Vince	GPM22200021135	Cluster of | Neurospora crassa OR74A | hypothetical protein | protein | length=173 (NCU03506)	| Neurospora crassa OR74A | hypothetical protein | protein | length=173	NCU03506	Neurospora crassa OR74A_rev.fasta	19077.6	1	2	2	2	0.0001	0.133
Vince Research01272020	Uncategorized Sample	Vince	GPM22200021135	Cluster of | Neurospora crassa OR74A | 6-phosphogluconate dehydrogenase | protein | length=492 (NCU03100)	| Neurospora crassa OR74A | 6-phosphogluconate dehydrogenase | protein | length=492	NCU03100	Neurospora crassa OR74A_rev.fasta	54227.2	1	5	5	5	0.0002	0.132
Vince Research01272020	Uncategorized Sample	Vince	GPM22200021135	Cluster of | Neurospora crassa OR74A | transcription factor-26 | protein | length=314 (NCU03033)	| Neurospora crassa OR74A | transcription factor-26 | protein | length=314	NCU03033	Neurospora crassa OR74A_rev.fasta	33900.1	1	3	3	3	0.0001	0.131
Vince Research01272020	Uncategorized Sample	Vince	GPM22200021135	Cluster of | Neurospora crassa OR74A | hypothetical protein | protein | length=344 (NCU11259)	| Neurospora crassa OR74A | hypothetical protein | protein | length=344	NCU11259	Neurospora crassa OR74A_rev.fasta	36133.2	1	2	2	2	0.0001	0.131
Vince Research01272020	Uncategorized Sample	Vince	GPM22200021135	Cluster of | Neurospora crassa OR74A | ATP-dependent RNA helicase drs-1 | protein | length=829 (NCU11175)	| Neurospora crassa OR74A | ATP-dependent RNA helicase drs-1 | protein | length=829	NCU11175	Neurospora crassa OR74A_rev.fasta	92028.4	1	9	9	9	0.0004	0.13
Vince Research01272020	Uncategorized Sample	Vince	GPM22200021135	Cluster of | Neurospora crassa OR74A | DUF159 domain-containing protein | protein | length=479 (NCU03985)	| Neurospora crassa OR74A | DUF159 domain-containing protein | protein | length=479	NCU03985	Neurospora crassa OR74A_rev.fasta	54007.8	1	4	4	4	0.0002	0.129
Vince Research01272020	Uncategorized Sample	Vince	GPM22200021135	Cluster of | Neurospora crassa OR74A | hypothetical protein | protein | length=349 (NCU06915)	| Neurospora crassa OR74A | hypothetical protein | protein | length=349	NCU06915	Neurospora crassa OR74A_rev.fasta	39413.4	1	4	4	4	0.0002	0.129
Vince Research01272020	Uncategorized Sample	Vince	GPM22200021135	Cluster of | Neurospora crassa OR74A | 60S ribosomal protein L16 | protein | length=249 (NCU06768)	| Neurospora crassa OR74A | 60S ribosomal protein L16 | protein | length=249	NCU06768	Neurospora crassa OR74A_rev.fasta	27396.2	1	3	3	3	0.0001	0.129
Vince Research01272020	Uncategorized Sample	Vince	GPM22200021135	Cluster of | Neurospora crassa OR74A | transcriptional regulator-1 | protein | length=633 (NCU02121)	| Neurospora crassa OR74A | transcriptional regulator-1 | protein | length=633	NCU02121	Neurospora crassa OR74A_rev.fasta	68703.4	1	6	7	7	0.0003	0.128
Vince Research01272020	Uncategorized Sample	Vince	GPM22200021135	Cluster of | Neurospora crassa OR74A | casein kinase II subunit alpha | protein | length=336 (NCU03124)	| Neurospora crassa OR74A | casein kinase II subunit alpha | protein | length=336	NCU03124	Neurospora crassa OR74A_rev.fasta	39640.5	1	3	3	3	0.0001	0.128
Vince Research01272020	Uncategorized Sample	Vince	GPM22200021135	Cluster of | Neurospora crassa OR74A | Malate dehydrogenase, malate dehydrogenase, variant 1 | protein | length=331 (NCU06211)	| Neurospora crassa OR74A | Malate dehydrogenase, malate dehydrogenase, variant 1 | protein | length=331	NCU06211	Neurospora crassa OR74A_rev.fasta	34409.6	1	2	2	3	0.0001	0.127
Vince Research01272020	Uncategorized Sample	Vince	GPM22200021135	Cluster of | Neurospora crassa OR74A | zinc finger transcription factor-58 | protein | length=784 (NCU02666)	| Neurospora crassa OR74A | zinc finger transcription factor-58 | protein | length=784	NCU02666	Neurospora crassa OR74A_rev.fasta	84041	1	4	4	5	0.0002	0.126
Vince Research01272020	Uncategorized Sample	Vince	GPM22200021135	Cluster of | Neurospora crassa OR74A | methionine-18 | protein | length=175 (NCU07466)	| Neurospora crassa OR74A | methionine-18 | protein | length=175	NCU07466	Neurospora crassa OR74A_rev.fasta	19575.7	1	2	4	4	0.0002	0.126
Vince Research01272020	Uncategorized Sample	Vince	GPM22200021135	Cluster of | Neurospora crassa OR74A | mitochondrial 30S ribosomal protein S12 | protein | length=174 (NCU06542)	| Neurospora crassa OR74A | mitochondrial 30S ribosomal protein S12 | protein | length=174	NCU06542	Neurospora crassa OR74A_rev.fasta	18623	1	2	2	2	0.0001	0.126
Vince Research01272020	Uncategorized Sample	Vince	GPM22200021135	Cluster of | Neurospora crassa OR74A | hypothetical protein, hypothetical protein, variant 1 | protein | length=513 (NCU08637)	| Neurospora crassa OR74A | hypothetical protein, hypothetical protein, variant 1 | protein | length=513	NCU08637	Neurospora crassa OR74A_rev.fasta	56338.8	1	4	5	5	0.0002	0.125
Vince Research01272020	Uncategorized Sample	Vince	GPM22200021135	Cluster of | Neurospora crassa OR74A | ribosome biogenesis-48 | protein | length=200 (NCU08121)	| Neurospora crassa OR74A | ribosome biogenesis-48 | protein | length=200	NCU08121	Neurospora crassa OR74A_rev.fasta	22506.7	1	3	3	3	0.0001	0.125
Vince Research01272020	Uncategorized Sample	Vince	GPM22200021135	Cluster of | Neurospora crassa OR74A | PH domain-containing protein | protein | length=498 (NCU03886)	| Neurospora crassa OR74A | PH domain-containing protein | protein | length=498	NCU03886	Neurospora crassa OR74A_rev.fasta	54547.8	1	4	5	5	0.0002	0.124
Vince Research01272020	Uncategorized Sample	Vince	GPM22200021135	Cluster of | Neurospora crassa OR74A | vacuolar membrane ATPase 6 | protein | length=364 (NCU03395)	| Neurospora crassa OR74A | vacuolar membrane ATPase 6 | protein | length=364	NCU03395	Neurospora crassa OR74A_rev.fasta	41009.4	1	3	3	3	0.0001	0.124
Vince Research01272020	Uncategorized Sample	Vince	GPM22200021135	Cluster of | Neurospora crassa OR74A | eukaryotic translation initiation factor 3 subunit 3 | protein | length=359 (NCU07929)	| Neurospora crassa OR74A | eukaryotic translation initiation factor 3 subunit 3 | protein | length=359	NCU07929	Neurospora crassa OR74A_rev.fasta	40371	1	4	4	4	0.0002	0.123
Vince Research01272020	Uncategorized Sample	Vince	GPM22200021135	Cluster of | Neurospora crassa OR74A | cryptochrome DASH | protein | length=745 (NCU00582)	| Neurospora crassa OR74A | cryptochrome DASH | protein | length=745	NCU00582	Neurospora crassa OR74A_rev.fasta	81412.9	1	6	6	6	0.0003	0.122
Vince Research01272020	Uncategorized Sample	Vince	GPM22200021135	Cluster of | Neurospora crassa OR74A | 26S proteasome regulatory subunit S5A | protein | length=303 (NCU02982)	| Neurospora crassa OR74A | 26S proteasome regulatory subunit S5A | protein | length=303	NCU02982	Neurospora crassa OR74A_rev.fasta	32400.1	1	3	3	3	0.0001	0.122
Vince Research01272020	Uncategorized Sample	Vince	GPM22200021135	Cluster of | Neurospora crassa OR74A | tRNA-cytosine methyltransferase-1 | protein | length=771 (NCU02511)	| Neurospora crassa OR74A | tRNA-cytosine methyltransferase-1 | protein | length=771	NCU02511	Neurospora crassa OR74A_rev.fasta	85291.5	1	8	8	8	0.0004	0.121
Vince Research01272020	Uncategorized Sample	Vince	GPM22200021135	Cluster of | Neurospora crassa OR74A | Phosphoenolpyruvate carboxykinase | protein | length=605 (NCU09873)	| Neurospora crassa OR74A | Phosphoenolpyruvate carboxykinase | protein | length=605	NCU09873	Neurospora crassa OR74A_rev.fasta	67259.2	1	6	6	6	0.0003	0.121
Vince Research01272020	Uncategorized Sample	Vince	GPM22200021135	Cluster of | Neurospora crassa OR74A | centractin | protein | length=380 (NCU04247)	| Neurospora crassa OR74A | centractin | protein | length=380	NCU04247	Neurospora crassa OR74A_rev.fasta	42383.6	1	3	3	3	0.0001	0.121
Vince Research01272020	Uncategorized Sample	Vince	GPM22200021135	Cluster of | Neurospora crassa OR74A | transcription factor iws-1 | protein | length=430 (NCU09203)	| Neurospora crassa OR74A | transcription factor iws-1 | protein | length=430	NCU09203	Neurospora crassa OR74A_rev.fasta	48433.9	1	3	3	3	0.0001	0.121
Vince Research01272020	Uncategorized Sample	Vince	GPM22200021135	Cluster of | Neurospora crassa OR74A | replication protein A-2 | protein | length=284 (NCU07717)	| Neurospora crassa OR74A | replication protein A-2 | protein | length=284	NCU07717	Neurospora crassa OR74A_rev.fasta	29430.4	1	2	2	2	0.0001	0.12
Vince Research01272020	Uncategorized Sample	Vince	GPM22200021135	Cluster of | Neurospora crassa OR74A | nucleolar ATPase Kre33 | protein | length=1062 (NCU02284)	| Neurospora crassa OR74A | nucleolar ATPase Kre33 | protein | length=1062	NCU02284	Neurospora crassa OR74A_rev.fasta	118381	1	11	11	11	0.0005	0.119
Vince Research01272020	Uncategorized Sample	Vince	GPM22200021135	Cluster of | Neurospora crassa OR74A | transcription elongation factor spt-5 | protein | length=1054 (NCU06929)	| Neurospora crassa OR74A | transcription elongation factor spt-5 | protein | length=1054	NCU06929	Neurospora crassa OR74A_rev.fasta	114290	1	11	11	11	0.0005	0.119
Vince Research01272020	Uncategorized Sample	Vince	GPM22200021135	Cluster of | Neurospora crassa OR74A | hypothetical protein | protein | length=444 (NCU00753)	| Neurospora crassa OR74A | hypothetical protein | protein | length=444	NCU00753	Neurospora crassa OR74A_rev.fasta	48282.8	1	4	6	6	0.0003	0.119
Vince Research01272020	Uncategorized Sample	Vince	GPM22200021135	Cluster of | Neurospora crassa OR74A | hypothetical protein | protein | length=502 (NCU04047)	| Neurospora crassa OR74A | hypothetical protein | protein | length=502	NCU04047	Neurospora crassa OR74A_rev.fasta	52027.8	1	4	4	4	0.0002	0.118
Vince Research01272020	Uncategorized Sample	Vince	GPM22200021135	Cluster of | Neurospora crassa OR74A | zinc finger transcription factor-44 | protein | length=1099 (NCU00155)	| Neurospora crassa OR74A | zinc finger transcription factor-44 | protein | length=1099	NCU00155	Neurospora crassa OR74A_rev.fasta	122282	1	8	12	12	0.0006	0.117
Vince Research01272020	Uncategorized Sample	Vince	GPM22200021135	Cluster of | Neurospora crassa OR74A | acetate utilization-19 | protein | length=487 (NCU06783)	| Neurospora crassa OR74A | acetate utilization-19 | protein | length=487	NCU06783	Neurospora crassa OR74A_rev.fasta	52970.2	1	5	5	5	0.0002	0.117
Vince Research01272020	Uncategorized Sample	Vince	GPM22200021135	Cluster of | Neurospora crassa OR74A | rad23-like protein | protein | length=383 (NCU07542)	| Neurospora crassa OR74A | rad23-like protein | protein | length=383	NCU07542	Neurospora crassa OR74A_rev.fasta	39987.2	1	3	4	4	0.0002	0.117
Vince Research01272020	Uncategorized Sample	Vince	GPM22200021135	Cluster of | Neurospora crassa OR74A | alpha-1,2-mannosyltransferase Kre5 | protein | length=503 (NCU05680)	| Neurospora crassa OR74A | alpha-1,2-mannosyltransferase Kre5 | protein | length=503	NCU05680	Neurospora crassa OR74A_rev.fasta	57849	1	4	4	4	0.0002	0.117
Vince Research01272020	Uncategorized Sample	Vince	GPM22200021135	Cluster of | Neurospora crassa OR74A | hypothetical protein | protein | length=366 (NCU06787)	| Neurospora crassa OR74A | hypothetical protein | protein | length=366	NCU06787	Neurospora crassa OR74A_rev.fasta	42599.8	1	3	3	3	0.0001	0.117
Vince Research01272020	Uncategorized Sample	Vince	GPM22200021135	Cluster of | Neurospora crassa OR74A | eukaryotic translation initiation factor 3 | protein | length=474 (NCU06279)	| Neurospora crassa OR74A | eukaryotic translation initiation factor 3 | protein | length=474	NCU06279	Neurospora crassa OR74A_rev.fasta	54469.2	1	5	5	5	0.0002	0.116
Vince Research01272020	Uncategorized Sample	Vince	GPM22200021135	Cluster of | Neurospora crassa OR74A | 50S ribosomal protein L5 | protein | length=352 (NCU04171)	| Neurospora crassa OR74A | 50S ribosomal protein L5 | protein | length=352	NCU04171	Neurospora crassa OR74A_rev.fasta	39119.3	1	3	3	3	0.0001	0.116
Vince Research01272020	Uncategorized Sample	Vince	GPM22200021135	Cluster of | Neurospora crassa OR74A | ribosome biogenesis-45 | protein | length=242 (NCU08951)	| Neurospora crassa OR74A | ribosome biogenesis-45 | protein | length=242	NCU08951	Neurospora crassa OR74A_rev.fasta	26834	1	2	3	3	0.0001	0.116
Vince Research01272020	Uncategorized Sample	Vince	GPM22200021135	Cluster of | Neurospora crassa OR74A | VAD-2, VAD-2, variant 1 | protein | length=719 (NCU02094)	| Neurospora crassa OR74A | VAD-2, VAD-2, variant 1 | protein | length=719	NCU02094	Neurospora crassa OR74A_rev.fasta	80846.8	1	6	6	6	0.0003	0.115
Vince Research01272020	Uncategorized Sample	Vince	GPM22200021135	Cluster of | Neurospora crassa OR74A | short-chain dehydrogenase/reductase SDR | protein | length=364 (NCU03893)	| Neurospora crassa OR74A | short-chain dehydrogenase/reductase SDR | protein | length=364	NCU03893	Neurospora crassa OR74A_rev.fasta	38786.7	1	3	3	3	0.0001	0.115
Vince Research01272020	Uncategorized Sample	Vince	GPM22200021135	Cluster of | Neurospora crassa OR74A | Aconitate hydratase | protein | length=217 (NCU00977)	| Neurospora crassa OR74A | Aconitate hydratase | protein | length=217	NCU00977	Neurospora crassa OR74A_rev.fasta	23916.3	1	2	2	2	0.0001	0.115
Vince Research01272020	Uncategorized Sample	Vince	GPM22200021135	Cluster of | Neurospora crassa OR74A | fluffy | protein | length=792 (NCU08726)	| Neurospora crassa OR74A | fluffy | protein | length=792	NCU08726	Neurospora crassa OR74A_rev.fasta	87889.7	1	7	7	7	0.0003	0.114
Vince Research01272020	Uncategorized Sample	Vince	GPM22200021135	Cluster of | Neurospora crassa OR74A | hypothetical protein | protein | length=237 (NCU09707)	| Neurospora crassa OR74A | hypothetical protein | protein | length=237	NCU09707	Neurospora crassa OR74A_rev.fasta	26752.6	1	2	2	2	0.0001	0.114
Vince Research01272020	Uncategorized Sample	Vince	GPM22200021135	Cluster of | Neurospora crassa OR74A | vacuolar sorting protein 1 | protein | length=706 (NCU04100)	| Neurospora crassa OR74A | vacuolar sorting protein 1 | protein | length=706	NCU04100	Neurospora crassa OR74A_rev.fasta	78087.1	1	5	5	5	0.0002	0.113
Vince Research01272020	Uncategorized Sample	Vince	GPM22200021135	Cluster of | Neurospora crassa OR74A | female fertility-7 | protein | length=717 (NCU04001)	| Neurospora crassa OR74A | female fertility-7 | protein | length=717	NCU04001	Neurospora crassa OR74A_rev.fasta	80100	1	5	5	5	0.0002	0.113
Vince Research01272020	Uncategorized Sample	Vince	GPM22200021135	Cluster of | Neurospora crassa OR74A | hypothetical protein, hypothetical protein, variant 1 | protein | length=522 (NCU00420)	| Neurospora crassa OR74A | hypothetical protein, hypothetical protein, variant 1 | protein | length=522	NCU00420	Neurospora crassa OR74A_rev.fasta	55107.9	1	4	4	4	0.0002	0.113
Vince Research01272020	Uncategorized Sample	Vince	GPM22200021135	Cluster of | Neurospora crassa OR74A | CTLH domain-containing protein | protein | length=247 (NCU05222)	| Neurospora crassa OR74A | CTLH domain-containing protein | protein | length=247	NCU05222	Neurospora crassa OR74A_rev.fasta	27877.8	1	2	2	2	0.0001	0.113
Vince Research01272020	Uncategorized Sample	Vince	GPM22200021135	Cluster of | Neurospora crassa OR74A | nonsense-mediated mRNA decay factor | protein | length=1140 (NCU05267)	| Neurospora crassa OR74A | nonsense-mediated mRNA decay factor | protein | length=1140	NCU05267	Neurospora crassa OR74A_rev.fasta	129389	1	10	10	10	0.0005	0.112
Vince Research01272020	Uncategorized Sample	Vince	GPM22200021135	Cluster of | Neurospora crassa OR74A | pyruvate carboxylase | protein | length=1192 (NCU02505)	| Neurospora crassa OR74A | pyruvate carboxylase | protein | length=1192	NCU02505	Neurospora crassa OR74A_rev.fasta	130986	1	10	10	10	0.0005	0.112
Vince Research01272020	Uncategorized Sample	Vince	GPM22200021135	Cluster of | Neurospora crassa OR74A | ubiquitin ligase subunit CulD | protein | length=1039 (NCU00272)	| Neurospora crassa OR74A | ubiquitin ligase subunit CulD | protein | length=1039	NCU00272	Neurospora crassa OR74A_rev.fasta	114419	1	7	8	8	0.0004	0.112
Vince Research01272020	Uncategorized Sample	Vince	GPM22200021135	Cluster of | Neurospora crassa OR74A | mannan polymerase II complex ANP1 subunit | protein | length=481 (NCU08024)	| Neurospora crassa OR74A | mannan polymerase II complex ANP1 subunit | protein | length=481	NCU08024	Neurospora crassa OR74A_rev.fasta	54453.3	1	4	4	4	0.0002	0.112
Vince Research01272020	Uncategorized Sample	Vince	GPM22200021135	Cluster of | Neurospora crassa OR74A | nucleoside diphosphate kinase | protein | length=277 (NCU04202)	| Neurospora crassa OR74A | nucleoside diphosphate kinase | protein | length=277	NCU04202	Neurospora crassa OR74A_rev.fasta	30137.1	1	3	4	4	0.0002	0.112
Vince Research01272020	Uncategorized Sample	Vince	GPM22200021135	Cluster of | Neurospora crassa OR74A | lysyl-tRNA synthetase | protein | length=618 (NCU04020)	| Neurospora crassa OR74A | lysyl-tRNA synthetase | protein | length=618	NCU04020	Neurospora crassa OR74A_rev.fasta	70716.1	1	4	4	4	0.0002	0.112
Vince Research01272020	Uncategorized Sample	Vince	GPM22200021135	Cluster of | Neurospora crassa OR74A | cell division control protein 12 | protein | length=385 (NCU03795)	| Neurospora crassa OR74A | cell division control protein 12 | protein | length=385	NCU03795	Neurospora crassa OR74A_rev.fasta	44559.1	1	2	2	3	0.0001	0.112
Vince Research01272020	Uncategorized Sample	Vince	GPM22200021135	Cluster of | Neurospora crassa OR74A | topisomerase II associated protein | protein | length=827 (NCU06540)	| Neurospora crassa OR74A | topisomerase II associated protein | protein | length=827	NCU06540	Neurospora crassa OR74A_rev.fasta	92269.3	1	7	7	7	0.0003	0.111
Vince Research01272020	Uncategorized Sample	Vince	GPM22200021135	Cluster of | Neurospora crassa OR74A | hypothetical protein | protein | length=693 (NCU09130)	| Neurospora crassa OR74A | hypothetical protein | protein | length=693	NCU09130	Neurospora crassa OR74A_rev.fasta	76960.8	1	5	5	5	0.0002	0.111
Vince Research01272020	Uncategorized Sample	Vince	GPM22200021135	Cluster of | Neurospora crassa OR74A | ribosome biogenesis-57 | protein | length=549 (NCU07864)	| Neurospora crassa OR74A | ribosome biogenesis-57 | protein | length=549	NCU07864	Neurospora crassa OR74A_rev.fasta	59769.7	1	4	4	4	0.0002	0.111
Vince Research01272020	Uncategorized Sample	Vince	GPM22200021135	Cluster of | Neurospora crassa OR74A | oxidoreductase | protein | length=379 (NCU09931)	| Neurospora crassa OR74A | oxidoreductase | protein | length=379	NCU09931	Neurospora crassa OR74A_rev.fasta	40564.8	1	3	3	3	0.0001	0.111
Vince Research01272020	Uncategorized Sample	Vince	GPM22200021135	Cluster of | Neurospora crassa OR74A | DNA-directed RNA polymerase II polypeptide | protein | length=171 (NCU02661)	| Neurospora crassa OR74A | DNA-directed RNA polymerase II polypeptide | protein | length=171	NCU02661	Neurospora crassa OR74A_rev.fasta	19020	1	2	2	2	0.0001	0.111
Vince Research01272020	Uncategorized Sample	Vince	GPM22200021135	Cluster of | Neurospora crassa OR74A | ribosomal RNA-processing protein 12 | protein | length=1275 (NCU01675)	| Neurospora crassa OR74A | ribosomal RNA-processing protein 12 | protein | length=1275	NCU01675	Neurospora crassa OR74A_rev.fasta	139071	1	10	14	14	0.0007	0.11
Vince Research01272020	Uncategorized Sample	Vince	GPM22200021135	Cluster of | Neurospora crassa OR74A | leucyl-tRNA synthetase | protein | length=1123 (NCU09463)	| Neurospora crassa OR74A | leucyl-tRNA synthetase | protein | length=1123	NCU09463	Neurospora crassa OR74A_rev.fasta	126404	1	8	8	8	0.0004	0.11
Vince Research01272020	Uncategorized Sample	Vince	GPM22200021135	Cluster of | Neurospora crassa OR74A | pumilio domain-containing protein | protein | length=679 (NCU09380)	| Neurospora crassa OR74A | pumilio domain-containing protein | protein | length=679	NCU09380	Neurospora crassa OR74A_rev.fasta	75036.1	1	7	8	8	0.0004	0.11
Vince Research01272020	Uncategorized Sample	Vince	GPM22200021135	Cluster of | Neurospora crassa OR74A | glycogen synthase, glycogen synthase, variant 1, glycogen synthase, variant 2, glycogen synthase, variant 3 | protein | length=706 (NCU06687)	| Neurospora crassa OR74A | glycogen synthase, glycogen synthase, variant 1, glycogen synthase, variant 2, glycogen synthase, variant 3 | protein | length=706	NCU06687	Neurospora crassa OR74A_rev.fasta	80907.9	1	5	5	5	0.0002	0.11
Vince Research01272020	Uncategorized Sample	Vince	GPM22200021135	Cluster of | Neurospora crassa OR74A | hypothetical protein | protein | length=436 (NCU00162)	| Neurospora crassa OR74A | hypothetical protein | protein | length=436	NCU00162	Neurospora crassa OR74A_rev.fasta	47981.4	1	3	3	3	0.0001	0.11
Vince Research01272020	Uncategorized Sample	Vince	GPM22200021135	Cluster of Keratin, type II cuticular Hb6 OS=Homo sapiens GN=KRT86 PE=1 SV=1 (sp|O43790|KRT86_HUMAN)	Keratin, type II cuticular Hb6 OS=Homo sapiens GN=KRT86 PE=1 SV=1	sp|O43790|KRT86_HUMAN	Neurospora crassa OR74A_rev.fasta	53499.9	1	1	1	3	0.0001	0.109
Vince Research01272020	Uncategorized Sample	Vince	GPM22200021135	Cluster of | Neurospora crassa OR74A | Imidazoleglycerol-phosphate dehydratase | protein | length=229 (NCU01300)	| Neurospora crassa OR74A | Imidazoleglycerol-phosphate dehydratase | protein | length=229	NCU01300	Neurospora crassa OR74A_rev.fasta	24313.7	1	2	2	2	0.0001	0.109
Vince Research01272020	Uncategorized Sample	Vince	GPM22200021135	Cluster of | Neurospora crassa OR74A | cell division control protein 54 | protein | length=1013 (NCU02539)	| Neurospora crassa OR74A | cell division control protein 54 | protein | length=1013	NCU02539	Neurospora crassa OR74A_rev.fasta	111577	1	8	8	8	0.0004	0.108
Vince Research01272020	Uncategorized Sample	Vince	GPM22200021135	Cluster of | Neurospora crassa OR74A | ATP binding protein | protein | length=399 (NCU04507)	| Neurospora crassa OR74A | ATP binding protein | protein | length=399	NCU04507	Neurospora crassa OR74A_rev.fasta	43782.9	1	3	3	3	0.0001	0.108
Vince Research01272020	Uncategorized Sample	Vince	GPM22200021135	Cluster of | Neurospora crassa OR74A | Rho-type GTPase | protein | length=195 (NCU01484)	| Neurospora crassa OR74A | Rho-type GTPase | protein | length=195	NCU01484	Neurospora crassa OR74A_rev.fasta	21971.2	1	2	2	2	0.0001	0.108
Vince Research01272020	Uncategorized Sample	Vince	GPM22200021135	Cluster of | Neurospora crassa OR74A | SET-3 | protein | length=1238 (NCU01932)	| Neurospora crassa OR74A | SET-3 | protein | length=1238	NCU01932	Neurospora crassa OR74A_rev.fasta	132176	1	11	11	11	0.0005	0.107
Vince Research01272020	Uncategorized Sample	Vince	GPM22200021135	Cluster of | Neurospora crassa OR74A | hypothetical protein | protein | length=365 (NCU03529)	| Neurospora crassa OR74A | hypothetical protein | protein | length=365	NCU03529	Neurospora crassa OR74A_rev.fasta	40136.8	1	3	3	3	0.0001	0.107
Vince Research01272020	Uncategorized Sample	Vince	GPM22200021135	Cluster of | Neurospora crassa OR74A | proteasome component PRE2 | protein | length=291 (NCU09309)	| Neurospora crassa OR74A | proteasome component PRE2 | protein | length=291	NCU09309	Neurospora crassa OR74A_rev.fasta	32171.9	1	2	2	2	0.0001	0.107
Vince Research01272020	Uncategorized Sample	Vince	GPM22200021135	Cluster of | Neurospora crassa OR74A | hypothetical protein | protein | length=197 (NCU07886)	| Neurospora crassa OR74A | hypothetical protein | protein | length=197	NCU07886	Neurospora crassa OR74A_rev.fasta	20306.6	1	2	2	2	0.0001	0.107
Vince Research01272020	Uncategorized Sample	Vince	GPM22200021135	Cluster of | Neurospora crassa OR74A | mito ribosomal protein L18 | protein | length=537 (NCU07505)	| Neurospora crassa OR74A | mito ribosomal protein L18 | protein | length=537	NCU07505	Neurospora crassa OR74A_rev.fasta	60247.2	1	2	2	2	0.0001	0.106
Vince Research01272020	Uncategorized Sample	Vince	GPM22200021135	Cluster of | Neurospora crassa OR74A | glycerophosphocholine phosphodiesterase-1 | protein | length=1245 (NCU01747)	| Neurospora crassa OR74A | glycerophosphocholine phosphodiesterase-1 | protein | length=1245	NCU01747	Neurospora crassa OR74A_rev.fasta	137802	1	11	13	13	0.0006	0.105
Vince Research01272020	Uncategorized Sample	Vince	GPM22200021135	Cluster of | Neurospora crassa OR74A | mannan polymerase complexes MNN9 subunit | protein | length=373 (NCU02635)	| Neurospora crassa OR74A | mannan polymerase complexes MNN9 subunit | protein | length=373	NCU02635	Neurospora crassa OR74A_rev.fasta	41638.7	1	2	2	2	0.0001	0.105
Vince Research01272020	Uncategorized Sample	Vince	GPM22200021135	Cluster of | Neurospora crassa OR74A | fungal specific transcription factor domain-containing protein, fungal specific transcription factor domain-containing protein, variant 1 | protein | length=780 (NCU09974)	| Neurospora crassa OR74A | fungal specific transcription factor domain-containing protein, fungal specific transcription factor domain-containing protein, variant 1 | protein | length=780	NCU09974	Neurospora crassa OR74A_rev.fasta	86703.3	1	6	6	6	0.0003	0.104
Vince Research01272020	Uncategorized Sample	Vince	GPM22200021135	Cluster of | Neurospora crassa OR74A | hypothetical protein | protein | length=356 (NCU07878)	| Neurospora crassa OR74A | hypothetical protein | protein | length=356	NCU07878	Neurospora crassa OR74A_rev.fasta	37999.8	1	3	3	3	0.0001	0.104
Vince Research01272020	Uncategorized Sample	Vince	GPM22200021135	Cluster of | Neurospora crassa OR74A | pyrABCN | protein | length=1832 (NCU08287)	| Neurospora crassa OR74A | pyrABCN | protein | length=1832	NCU08287	Neurospora crassa OR74A_rev.fasta	202679	1	15	15	16	0.0008	0.103
Vince Research01272020	Uncategorized Sample	Vince	GPM22200021135	Cluster of | Neurospora crassa OR74A | DNA replication licensing factor MCM2 | protein | length=882 (NCU04327)	| Neurospora crassa OR74A | DNA replication licensing factor MCM2 | protein | length=882	NCU04327	Neurospora crassa OR74A_rev.fasta	98207.1	1	7	7	9	0.0004	0.103
Vince Research01272020	Uncategorized Sample	Vince	GPM22200021135	Cluster of | Neurospora crassa OR74A | DNA replication licensing factor mcm3 | protein | length=944 (NCU08009)	| Neurospora crassa OR74A | DNA replication licensing factor mcm3 | protein | length=944	NCU08009	Neurospora crassa OR74A_rev.fasta	105142	1	7	7	7	0.0003	0.103
Vince Research01272020	Uncategorized Sample	Vince	GPM22200021135	Cluster of | Neurospora crassa OR74A | DUF1711 domain-containing protein | protein | length=291 (NCU01410)	| Neurospora crassa OR74A | DUF1711 domain-containing protein | protein | length=291	NCU01410	Neurospora crassa OR74A_rev.fasta	29345.7	1	3	3	3	0.0001	0.103
Vince Research01272020	Uncategorized Sample	Vince	GPM22200021135	Cluster of | Neurospora crassa OR74A | 3-isopropylmalate dehydrogenase | protein | length=368 (NCU06232)	| Neurospora crassa OR74A | 3-isopropylmalate dehydrogenase | protein | length=368	NCU06232	Neurospora crassa OR74A_rev.fasta	38662.4	1	3	3	3	0.0001	0.103
Vince Research01272020	Uncategorized Sample	Vince	GPM22200021135	Cluster of | Neurospora crassa OR74A | CCAAT-binding transcription factor subunit AAB-1, CCAAT-binding transcription factor subunit AAB-1, variant 1, CCAAT-binding transcription factor subunit AAB-1, variant 2 | protein | length=271 (NCU00116)	| Neurospora crassa OR74A | CCAAT-binding transcription factor subunit AAB-1, CCAAT-binding transcription factor subunit AAB-1, variant 1, CCAAT-binding transcription factor subunit AAB-1, variant 2 | protein | length=271	NCU00116	Neurospora crassa OR74A_rev.fasta	29600.9	1	2	2	2	0.0001	0.103
Vince Research01272020	Uncategorized Sample	Vince	GPM22200021135	Cluster of | Neurospora crassa OR74A | YjeF_N domain-containing protein | protein | length=801 (NCU00427)	| Neurospora crassa OR74A | YjeF_N domain-containing protein | protein | length=801	NCU00427	Neurospora crassa OR74A_rev.fasta	86780.9	1	5	6	6	0.0003	0.102
Vince Research01272020	Uncategorized Sample	Vince	GPM22200021135	Cluster of | Neurospora crassa OR74A | hypothetical protein | protein | length=421 (NCU00856)	| Neurospora crassa OR74A | hypothetical protein | protein | length=421	NCU00856	Neurospora crassa OR74A_rev.fasta	47740.5	1	3	3	3	0.0001	0.102
Vince Research01272020	Uncategorized Sample	Vince	GPM22200021135	Cluster of | Neurospora crassa OR74A | 30S ribosomal protein S10 | protein | length=268 (NCU00114)	| Neurospora crassa OR74A | 30S ribosomal protein S10 | protein | length=268	NCU00114	Neurospora crassa OR74A_rev.fasta	30332.9	1	2	2	2	0.0001	0.101
Vince Research01272020	Uncategorized Sample	Vince	GPM22200021135	Cluster of | Neurospora crassa OR74A | histidine kinase | protein | length=1298 (NCU02815)	| Neurospora crassa OR74A | histidine kinase | protein | length=1298	NCU02815	Neurospora crassa OR74A_rev.fasta	141931	1	8	8	8	0.0004	0.1
Vince Research01272020	Uncategorized Sample	Vince	GPM22200021135	Cluster of | Neurospora crassa OR74A | hypothetical protein | protein | length=458 (NCU03083)	| Neurospora crassa OR74A | hypothetical protein | protein | length=458	NCU03083	Neurospora crassa OR74A_rev.fasta	49949.8	1	2	2	2	0.0001	0.1
Vince Research01272020	Uncategorized Sample	Vince	GPM22200021135	Cluster of | Neurospora crassa OR74A | hypothetical protein | protein | length=1105 (NCU09048)	| Neurospora crassa OR74A | hypothetical protein | protein | length=1105	NCU09048	Neurospora crassa OR74A_rev.fasta	123149	1	8	8	8	0.0004	0.0995
Vince Research01272020	Uncategorized Sample	Vince	GPM22200021135	Cluster of | Neurospora crassa OR74A | kinetochore protein-16 | protein | length=302 (NCU08999)	| Neurospora crassa OR74A | kinetochore protein-16 | protein | length=302	NCU08999	Neurospora crassa OR74A_rev.fasta	33278.7	1	2	2	2	0.0001	0.0993
Vince Research01272020	Uncategorized Sample	Vince	GPM22200021135	Cluster of | Neurospora crassa OR74A | mannan polymerase II complex ANP1 subunit | protein | length=404 (NCU08939)	| Neurospora crassa OR74A | mannan polymerase II complex ANP1 subunit | protein | length=404	NCU08939	Neurospora crassa OR74A_rev.fasta	45895.4	1	3	3	3	0.0001	0.099
Vince Research01272020	Uncategorized Sample	Vince	GPM22200021135	Cluster of | Neurospora crassa OR74A | transaldolase | protein | length=324 (NCU02136)	| Neurospora crassa OR74A | transaldolase | protein | length=324	NCU02136	Neurospora crassa OR74A_rev.fasta	35230.5	1	2	2	2	0.0001	0.0988
Vince Research01272020	Uncategorized Sample	Vince	GPM22200021135	Cluster of | Neurospora crassa OR74A | ribosome biogenesis-47 | protein | length=790 (NCU02066)	| Neurospora crassa OR74A | ribosome biogenesis-47 | protein | length=790	NCU02066	Neurospora crassa OR74A_rev.fasta	89748.2	1	6	6	6	0.0003	0.0987
Vince Research01272020	Uncategorized Sample	Vince	GPM22200021135	Cluster of | Neurospora crassa OR74A | U3 small nucleolar ribonucleoprotein IMP3 | protein | length=183 (NCU01008)	| Neurospora crassa OR74A | U3 small nucleolar ribonucleoprotein IMP3 | protein | length=183	NCU01008	Neurospora crassa OR74A_rev.fasta	21692.6	1	2	2	2	0.0001	0.0984
Vince Research01272020	Uncategorized Sample	Vince	GPM22200021135	Cluster of | Neurospora crassa OR74A | T-complex protein 1 subunit beta | protein | length=530 (NCU02207)	| Neurospora crassa OR74A | T-complex protein 1 subunit beta | protein | length=530	NCU02207	Neurospora crassa OR74A_rev.fasta	56920.6	1	3	3	3	0.0001	0.0981
Vince Research01272020	Uncategorized Sample	Vince	GPM22200021135	Cluster of | Neurospora crassa OR74A | guanine triphosphate binding-11 | protein | length=214 (NCU01523)	| Neurospora crassa OR74A | guanine triphosphate binding-11 | protein | length=214	NCU01523	Neurospora crassa OR74A_rev.fasta	23719.1	1	2	2	2	0.0001	0.0981
Vince Research01272020	Uncategorized Sample	Vince	GPM22200021135	Cluster of | Neurospora crassa OR74A | hypothetical protein | protein | length=348 (NCU06399)	| Neurospora crassa OR74A | hypothetical protein | protein | length=348	NCU06399	Neurospora crassa OR74A_rev.fasta	36856.2	1	2	2	2	0.0001	0.0977
Vince Research01272020	Uncategorized Sample	Vince	GPM22200021135	Cluster of | Neurospora crassa OR74A | hypothetical protein | protein | length=462 (NCU06290)	| Neurospora crassa OR74A | hypothetical protein | protein | length=462	NCU06290	Neurospora crassa OR74A_rev.fasta	49754.2	1	3	3	3	0.0001	0.0974
Vince Research01272020	Uncategorized Sample	Vince	GPM22200021135	Cluster of | Neurospora crassa OR74A | ATP-dependent RNA helicase dbp-5 | protein | length=483 (NCU01160)	| Neurospora crassa OR74A | ATP-dependent RNA helicase dbp-5 | protein | length=483	NCU01160	Neurospora crassa OR74A_rev.fasta	53216.6	1	4	4	4	0.0002	0.0973
Vince Research01272020	Uncategorized Sample	Vince	GPM22200021135	Cluster of | Neurospora crassa OR74A | hypothetical protein | protein | length=386 (NCU09088)	| Neurospora crassa OR74A | hypothetical protein | protein | length=386	NCU09088	Neurospora crassa OR74A_rev.fasta	43148.8	1	3	3	3	0.0001	0.0959
Vince Research01272020	Uncategorized Sample	Vince	GPM22200021135	Cluster of | Neurospora crassa OR74A | zinc finger transcription factor-24 | protein | length=790 (NCU06503)	| Neurospora crassa OR74A | zinc finger transcription factor-24 | protein | length=790	NCU06503	Neurospora crassa OR74A_rev.fasta	88167.8	1	4	4	4	0.0002	0.0949
Vince Research01272020	Uncategorized Sample	Vince	GPM22200021135	Cluster of | Neurospora crassa OR74A | DNA replication licensing factor mcm7 | protein | length=824 (NCU08119)	| Neurospora crassa OR74A | DNA replication licensing factor mcm7 | protein | length=824	NCU08119	Neurospora crassa OR74A_rev.fasta	92200.3	1	5	5	5	0.0002	0.0947
Vince Research01272020	Uncategorized Sample	Vince	GPM22200021135	Cluster of | Neurospora crassa OR74A | WD repeat containing protein 23 | protein | length=677 (NCU02151)	| Neurospora crassa OR74A | WD repeat containing protein 23 | protein | length=677	NCU02151	Neurospora crassa OR74A_rev.fasta	75968.3	1	5	5	5	0.0002	0.0945
Vince Research01272020	Uncategorized Sample	Vince	GPM22200021135	Cluster of | Neurospora crassa OR74A | DNA-directed RNA polymerase II largest subunit | protein | length=1761 (NCU02103)	| Neurospora crassa OR74A | DNA-directed RNA polymerase II largest subunit | protein | length=1761	NCU02103	Neurospora crassa OR74A_rev.fasta	193826	1	13	14	15	0.0007	0.0943
Vince Research01272020	Uncategorized Sample	Vince	GPM22200021135	Cluster of | Neurospora crassa OR74A | vacuolar membrane ATPase 1 | protein | length=607 (NCU01207)	| Neurospora crassa OR74A | vacuolar membrane ATPase 1 | protein | length=607	NCU01207	Neurospora crassa OR74A_rev.fasta	67122.2	1	4	4	4	0.0002	0.0939
Vince Research01272020	Uncategorized Sample	Vince	GPM22200021135	Cluster of | Neurospora crassa OR74A | DNA damage-binding protein 1 | protein | length=1158 (NCU06605)	| Neurospora crassa OR74A | DNA damage-binding protein 1 | protein | length=1158	NCU06605	Neurospora crassa OR74A_rev.fasta	128649	1	9	9	9	0.0004	0.0933
Vince Research01272020	Uncategorized Sample	Vince	GPM22200021135	Cluster of | Neurospora crassa OR74A | Phosphoglycerate kinase | protein | length=418 (NCU07914)	| Neurospora crassa OR74A | Phosphoglycerate kinase | protein | length=418	NCU07914	Neurospora crassa OR74A_rev.fasta	45058.2	1	3	3	3	0.0001	0.0933
Vince Research01272020	Uncategorized Sample	Vince	GPM22200021135	Cluster of | Neurospora crassa OR74A | translational activator | protein | length=2692 (NCU05803)	| Neurospora crassa OR74A | translational activator | protein | length=2692	NCU05803	Neurospora crassa OR74A_rev.fasta	292347	1	17	17	17	0.0008	0.0929
Vince Research01272020	Uncategorized Sample	Vince	GPM22200021135	Cluster of | Neurospora crassa OR74A | ribosome biogenesis-52 | protein | length=261 (NCU00981)	| Neurospora crassa OR74A | ribosome biogenesis-52 | protein | length=261	NCU00981	Neurospora crassa OR74A_rev.fasta	29398.6	1	2	2	2	0.0001	0.092
Vince Research01272020	Uncategorized Sample	Vince	GPM22200021135	Cluster of | Neurospora crassa OR74A | mitochondrial genome maintenance-1 | protein | length=337 (NCU05517)	| Neurospora crassa OR74A | mitochondrial genome maintenance-1 | protein | length=337	NCU05517	Neurospora crassa OR74A_rev.fasta	36463.6	1	2	2	2	0.0001	0.092
Vince Research01272020	Uncategorized Sample	Vince	GPM22200021135	Cluster of | Neurospora crassa OR74A | serine/threonine-protein phosphatase PP1 | protein | length=308 (NCU00043)	| Neurospora crassa OR74A | serine/threonine-protein phosphatase PP1 | protein | length=308	NCU00043	Neurospora crassa OR74A_rev.fasta	35569.8	1	2	2	2	0.0001	0.0909
Vince Research01272020	Uncategorized Sample	Vince	GPM22200021135	Cluster of | Neurospora crassa OR74A | hypothetical protein | protein | length=447 (NCU08861)	| Neurospora crassa OR74A | hypothetical protein | protein | length=447	NCU08861	Neurospora crassa OR74A_rev.fasta	49443.9	1	3	3	3	0.0001	0.0895
Vince Research01272020	Uncategorized Sample	Vince	GPM22200021135	Cluster of | Neurospora crassa OR74A | NAD-epimerase/dehydratase-2 | protein | length=416 (NCU00884)	| Neurospora crassa OR74A | NAD-epimerase/dehydratase-2 | protein | length=416	NCU00884	Neurospora crassa OR74A_rev.fasta	46599.5	1	3	3	3	0.0001	0.0889
Vince Research01272020	Uncategorized Sample	Vince	GPM22200021135	Cluster of | Neurospora crassa OR74A | WD repeat containing protein 36 | protein | length=1063 (NCU07011)	| Neurospora crassa OR74A | WD repeat containing protein 36 | protein | length=1063	NCU07011	Neurospora crassa OR74A_rev.fasta	116873	1	5	5	5	0.0002	0.0884
Vince Research01272020	Uncategorized Sample	Vince	GPM22200021135	Cluster of | Neurospora crassa OR74A | transducin family protein | protein | length=538 (NCU02729)	| Neurospora crassa OR74A | transducin family protein | protein | length=538	NCU02729	Neurospora crassa OR74A_rev.fasta	60132.7	1	4	4	4	0.0002	0.0874
Vince Research01272020	Uncategorized Sample	Vince	GPM22200021135	Cluster of | Neurospora crassa OR74A | hypothetical protein | protein | length=333 (NCU02561)	| Neurospora crassa OR74A | hypothetical protein | protein | length=333	NCU02561	Neurospora crassa OR74A_rev.fasta	36797.4	1	3	3	3	0.0001	0.0871
Vince Research01272020	Uncategorized Sample	Vince	GPM22200021135	Cluster of | Neurospora crassa OR74A | DNA replication licensing factor mcm5 | protein | length=724 (NCU01171)	| Neurospora crassa OR74A | DNA replication licensing factor mcm5 | protein | length=724	NCU01171	Neurospora crassa OR74A_rev.fasta	80479.9	1	5	5	5	0.0002	0.087
Vince Research01272020	Uncategorized Sample	Vince	GPM22200021135	Cluster of | Neurospora crassa OR74A | ubiquitin-11 | protein | length=4076 (NCU08501)	| Neurospora crassa OR74A | ubiquitin-11 | protein | length=4076	NCU08501	Neurospora crassa OR74A_rev.fasta	453674	1	24	25	25	0.0012	0.0859
Vince Research01272020	Uncategorized Sample	Vince	GPM22200021135	Cluster of | Neurospora crassa OR74A | protein-tyrosine phosphatase 2 | protein | length=571 (NCU02257)	| Neurospora crassa OR74A | protein-tyrosine phosphatase 2 | protein | length=571	NCU02257	Neurospora crassa OR74A_rev.fasta	64234.2	1	3	3	3	0.0001	0.0858
Vince Research01272020	Uncategorized Sample	Vince	GPM22200021135	Cluster of | Neurospora crassa OR74A | tRNA-processing-10 | protein | length=840 (NCU04410)	| Neurospora crassa OR74A | tRNA-processing-10 | protein | length=840	NCU04410	Neurospora crassa OR74A_rev.fasta	95536.1	1	8	9	9	0.0004	0.0857
Vince Research01272020	Uncategorized Sample	Vince	GPM22200021135	Cluster of | Neurospora crassa OR74A | serine/threonine-protein phosphatase PP2A catalytic subunit | protein | length=327 (NCU06630)	| Neurospora crassa OR74A | serine/threonine-protein phosphatase PP2A catalytic subunit | protein | length=327	NCU06630	Neurospora crassa OR74A_rev.fasta	37291.7	1	2	2	2	0.0001	0.0856
Vince Research01272020	Uncategorized Sample	Vince	GPM22200021135	Cluster of | Neurospora crassa OR74A | cohesin complex subunit | protein | length=1263 (NCU01323)	| Neurospora crassa OR74A | cohesin complex subunit | protein | length=1263	NCU01323	Neurospora crassa OR74A_rev.fasta	144699	1	8	9	9	0.0004	0.0855
Vince Research01272020	Uncategorized Sample	Vince	GPM22200021135	Cluster of | Neurospora crassa OR74A | Arg-6 protein, Arg-6 protein, variant 1 | protein | length=871 (NCU00567)	| Neurospora crassa OR74A | Arg-6 protein, Arg-6 protein, variant 1 | protein | length=871	NCU00567	Neurospora crassa OR74A_rev.fasta	95905.2	1	6	6	6	0.0003	0.085
Vince Research01272020	Uncategorized Sample	Vince	GPM22200021135	Cluster of | Neurospora crassa OR74A | 60S ribosomal protein L44 | protein | length=106 (NCU00706)	| Neurospora crassa OR74A | 60S ribosomal protein L44 | protein | length=106	NCU00706	Neurospora crassa OR74A_rev.fasta	11912.2	1	2	2	2	0.0001	0.0849
Vince Research01272020	Uncategorized Sample	Vince	GPM22200021135	Cluster of | Neurospora crassa OR74A | outer mitochondrial membrane protein porin | protein | length=283 (NCU04304)	| Neurospora crassa OR74A | outer mitochondrial membrane protein porin | protein | length=283	NCU04304	Neurospora crassa OR74A_rev.fasta	30000	1	2	2	2	0.0001	0.0848
Vince Research01272020	Uncategorized Sample	Vince	GPM22200021135	Cluster of | Neurospora crassa OR74A | protein phosphatase-9 | protein | length=331 (NCU04600)	| Neurospora crassa OR74A | protein phosphatase-9 | protein | length=331	NCU04600	Neurospora crassa OR74A_rev.fasta	35827.4	1	2	2	2	0.0001	0.0846
Vince Research01272020	Uncategorized Sample	Vince	GPM22200021135	Cluster of | Neurospora crassa OR74A | nonsense-mediated mRNA decay protein | protein | length=1047 (NCU01939)	| Neurospora crassa OR74A | nonsense-mediated mRNA decay protein | protein | length=1047	NCU01939	Neurospora crassa OR74A_rev.fasta	119498	1	6	6	6	0.0003	0.084
Vince Research01272020	Uncategorized Sample	Vince	GPM22200021135	Cluster of | Neurospora crassa OR74A | hypothetical protein, hypothetical protein, variant 1, hypothetical protein, variant 2 | protein | length=524 (NCU02718)	| Neurospora crassa OR74A | hypothetical protein, hypothetical protein, variant 1, hypothetical protein, variant 2 | protein | length=524	NCU02718	Neurospora crassa OR74A_rev.fasta	58123.7	1	3	3	3	0.0001	0.084
Vince Research01272020	Uncategorized Sample	Vince	GPM22200021135	Cluster of | Neurospora crassa OR74A | ribose-phosphate pyrophosphokinase II, ribose-phosphate pyrophosphokinase II, variant 1 | protein | length=323 (NCU06970)	| Neurospora crassa OR74A | ribose-phosphate pyrophosphokinase II, ribose-phosphate pyrophosphokinase II, variant 1 | protein | length=323	NCU06970	Neurospora crassa OR74A_rev.fasta	34939.3	1	2	2	2	0.0001	0.0836
Vince Research01272020	Uncategorized Sample	Vince	GPM22200021135	Cluster of | Neurospora crassa OR74A | small nucleolar ribonucleoprotein complex subunit | protein | length=623 (NCU03018)	| Neurospora crassa OR74A | small nucleolar ribonucleoprotein complex subunit | protein | length=623	NCU03018	Neurospora crassa OR74A_rev.fasta	69361.8	1	4	4	4	0.0002	0.0835
Vince Research01272020	Uncategorized Sample	Vince	GPM22200021135	Cluster of | Neurospora crassa OR74A | rhomboid family protein, rhomboid family protein, variant 1 | protein | length=373 (NCU06839)	| Neurospora crassa OR74A | rhomboid family protein, rhomboid family protein, variant 1 | protein | length=373	NCU06839	Neurospora crassa OR74A_rev.fasta	40695.8	1	2	2	2	0.0001	0.0831
Vince Research01272020	Uncategorized Sample	Vince	GPM22200021135	Cluster of | Neurospora crassa OR74A | ATP-dependent RNA helicase dbp-9 | protein | length=676 (NCU07070)	| Neurospora crassa OR74A | ATP-dependent RNA helicase dbp-9 | protein | length=676	NCU07070	Neurospora crassa OR74A_rev.fasta	76619	1	4	4	4	0.0002	0.0828
Vince Research01272020	Uncategorized Sample	Vince	GPM22200021135	Cluster of | Neurospora crassa OR74A | hypothetical protein | protein | length=302 (NCU16972)	| Neurospora crassa OR74A | hypothetical protein | protein | length=302	NCU16972	Neurospora crassa OR74A_rev.fasta	33504	1	2	2	2	0.0001	0.0828
Vince Research01272020	Uncategorized Sample	Vince	GPM22200021135	Cluster of | Neurospora crassa OR74A | T-complex protein 1 subunit theta | protein | length=547 (NCU07567)	| Neurospora crassa OR74A | T-complex protein 1 subunit theta | protein | length=547	NCU07567	Neurospora crassa OR74A_rev.fasta	59313.5	1	4	4	4	0.0002	0.0823
Vince Research01272020	Uncategorized Sample	Vince	GPM22200021135	Cluster of | Neurospora crassa OR74A | Ca/CaM-dependent kinase-1, variant 1, Ca/CaM-dependent kinase-1, variant 2, ca/CaM-dependent kinase-1 | protein | length=413 (NCU09123)	| Neurospora crassa OR74A | Ca/CaM-dependent kinase-1, variant 1, Ca/CaM-dependent kinase-1, variant 2, ca/CaM-dependent kinase-1 | protein | length=413	NCU09123	Neurospora crassa OR74A_rev.fasta	46446.2	1	3	3	3	0.0001	0.0823
Vince Research01272020	Uncategorized Sample	Vince	GPM22200021135	Cluster of | Neurospora crassa OR74A | steroid alpha reductase | protein | length=316 (NCU03362)	| Neurospora crassa OR74A | steroid alpha reductase | protein | length=316	NCU03362	Neurospora crassa OR74A_rev.fasta	35713.4	1	2	2	2	0.0001	0.0823
Vince Research01272020	Uncategorized Sample	Vince	GPM22200021135	Cluster of | Neurospora crassa OR74A | ATP-dependent RNA helicase mak-5 | protein | length=805 (NCU04041)	| Neurospora crassa OR74A | ATP-dependent RNA helicase mak-5 | protein | length=805	NCU04041	Neurospora crassa OR74A_rev.fasta	89256.5	1	5	5	5	0.0002	0.082
Vince Research01272020	Uncategorized Sample	Vince	GPM22200021135	Cluster of | Neurospora crassa OR74A | C-8 sterol isomerase, putative | protein | length=256 (NCU04156)	| Neurospora crassa OR74A | C-8 sterol isomerase, putative | protein | length=256	NCU04156	Neurospora crassa OR74A_rev.fasta	28246.6	1	2	2	2	0.0001	0.082
Vince Research01272020	Uncategorized Sample	Vince	GPM22200021135	Cluster of | Neurospora crassa OR74A | universal stress protein family domain-containing protein | protein | length=380 (NCU00004)	| Neurospora crassa OR74A | universal stress protein family domain-containing protein | protein | length=380	NCU00004	Neurospora crassa OR74A_rev.fasta	42143.4	1	2	3	3	0.0001	0.0816
Vince Research01272020	Uncategorized Sample	Vince	GPM22200021135	Cluster of | Neurospora crassa OR74A | phenylalanyl-tRNA synthetase subunit alpha | protein | length=517 (NCU05095)	| Neurospora crassa OR74A | phenylalanyl-tRNA synthetase subunit alpha | protein | length=517	NCU05095	Neurospora crassa OR74A_rev.fasta	57924.4	1	3	3	3	0.0001	0.0812
Vince Research01272020	Uncategorized Sample	Vince	GPM22200021135	Cluster of | Neurospora crassa OR74A | ATP-dependent RNA helicase dbp-7 | protein | length=814 (NCU06520)	| Neurospora crassa OR74A | ATP-dependent RNA helicase dbp-7 | protein | length=814	NCU06520	Neurospora crassa OR74A_rev.fasta	88509.3	1	5	5	5	0.0002	0.0811
Vince Research01272020	Uncategorized Sample	Vince	GPM22200021135	Cluster of | Neurospora crassa OR74A | T-complex protein 1 subunit zeta | protein | length=544 (NCU09709)	| Neurospora crassa OR74A | T-complex protein 1 subunit zeta | protein | length=544	NCU09709	Neurospora crassa OR74A_rev.fasta	58830.2	1	4	4	4	0.0002	0.0809
Vince Research01272020	Uncategorized Sample	Vince	GPM22200021135	Cluster of | Neurospora crassa OR74A | serine protease p2 | protein | length=532 (NCU00673)	| Neurospora crassa OR74A | serine protease p2 | protein | length=532	NCU00673	Neurospora crassa OR74A_rev.fasta	56767.3	1	4	4	4	0.0002	0.0808
Vince Research01272020	Uncategorized Sample	Vince	GPM22200021135	Cluster of | Neurospora crassa OR74A | coatomer alpha subunit | protein | length=1223 (NCU10066)	| Neurospora crassa OR74A | coatomer alpha subunit | protein | length=1223	NCU10066	Neurospora crassa OR74A_rev.fasta	136404	1	7	7	7	0.0003	0.0801
Vince Research01272020	Uncategorized Sample	Vince	GPM22200021135	Cluster of | Neurospora crassa OR74A | 26S proteasome regulatory subunit rpn11 | protein | length=338 (NCU00823)	| Neurospora crassa OR74A | 26S proteasome regulatory subunit rpn11 | protein | length=338	NCU00823	Neurospora crassa OR74A_rev.fasta	37639.8	1	2	2	2	0.0001	0.0799
Vince Research01272020	Uncategorized Sample	Vince	GPM22200021135	Cluster of | Neurospora crassa OR74A | ATP-dependent RNA helicase has-1 | protein | length=578 (NCU09349)	| Neurospora crassa OR74A | ATP-dependent RNA helicase has-1 | protein | length=578	NCU09349	Neurospora crassa OR74A_rev.fasta	64662.5	1	4	4	4	0.0002	0.0796
Vince Research01272020	Uncategorized Sample	Vince	GPM22200021135	Cluster of | Neurospora crassa OR74A | vacuolar ATPase subunit D | protein | length=264 (NCU08035)	| Neurospora crassa OR74A | vacuolar ATPase subunit D | protein | length=264	NCU08035	Neurospora crassa OR74A_rev.fasta	29493	1	2	2	2	0.0001	0.0795
Vince Research01272020	Uncategorized Sample	Vince	GPM22200021135	Cluster of | Neurospora crassa OR74A | 1,3-beta-glucan synthase component GLS1 | protein | length=1955 (NCU06871)	| Neurospora crassa OR74A | 1,3-beta-glucan synthase component GLS1 | protein | length=1955	NCU06871	Neurospora crassa OR74A_rev.fasta	223433	1	11	11	11	0.0005	0.0788
Vince Research01272020	Uncategorized Sample	Vince	GPM22200021135	Cluster of | Neurospora crassa OR74A | Gld1 | protein | length=331 (NCU04923)	| Neurospora crassa OR74A | Gld1 | protein | length=331	NCU04923	Neurospora crassa OR74A_rev.fasta	37533	1	2	2	2	0.0001	0.0785
Vince Research01272020	Uncategorized Sample	Vince	GPM22200021135	Cluster of | Neurospora crassa OR74A | ubiquitin terminal hydrolase-7 | protein | length=1162 (NCU03797)	| Neurospora crassa OR74A | ubiquitin terminal hydrolase-7 | protein | length=1162	NCU03797	Neurospora crassa OR74A_rev.fasta	134373	1	8	8	8	0.0004	0.0783
Vince Research01272020	Uncategorized Sample	Vince	GPM22200021135	Cluster of | Neurospora crassa OR74A | ATP-dependent RNA helicase dbp-3 | protein | length=614 (NCU05782)	| Neurospora crassa OR74A | ATP-dependent RNA helicase dbp-3 | protein | length=614	NCU05782	Neurospora crassa OR74A_rev.fasta	67749.7	1	3	3	3	0.0001	0.0782
Vince Research01272020	Uncategorized Sample	Vince	GPM22200021135	Cluster of | Neurospora crassa OR74A | translation-6 | protein | length=412 (NCU08952)	| Neurospora crassa OR74A | translation-6 | protein | length=412	NCU08952	Neurospora crassa OR74A_rev.fasta	44349.8	1	2	2	2	0.0001	0.0777
Vince Research01272020	Uncategorized Sample	Vince	GPM22200021135	Cluster of | Neurospora crassa OR74A | Methyltransferase | protein | length=892 (NCU05301)	| Neurospora crassa OR74A | Methyltransferase | protein | length=892	NCU05301	Neurospora crassa OR74A_rev.fasta	100162	1	5	5	5	0.0002	0.0774
Vince Research01272020	Uncategorized Sample	Vince	GPM22200021135	Cluster of | Neurospora crassa OR74A | SNF2-family ATP dependent chromatin remodeling factor snf21 | protein | length=1482 (NCU06488)	| Neurospora crassa OR74A | SNF2-family ATP dependent chromatin remodeling factor snf21 | protein | length=1482	NCU06488	Neurospora crassa OR74A_rev.fasta	168236	1	7	7	9	0.0004	0.0769
Vince Research01272020	Uncategorized Sample	Vince	GPM22200021135	Cluster of | Neurospora crassa OR74A | endoplamic reticulum-2 | protein | length=380 (NCU03214)	| Neurospora crassa OR74A | endoplamic reticulum-2 | protein | length=380	NCU03214	Neurospora crassa OR74A_rev.fasta	42835.5	1	2	2	2	0.0001	0.0763
Vince Research01272020	Uncategorized Sample	Vince	GPM22200021135	Cluster of | Neurospora crassa OR74A | Ribosome biogenesis protein | protein | length=1160 (NCU04348)	| Neurospora crassa OR74A | Ribosome biogenesis protein | protein | length=1160	NCU04348	Neurospora crassa OR74A_rev.fasta	132513	1	7	7	7	0.0003	0.0759
Vince Research01272020	Uncategorized Sample	Vince	GPM22200021135	Cluster of | Neurospora crassa OR74A | AdoMet-dependent rRNA methyltransferase spb1 | protein | length=831 (NCU03669)	| Neurospora crassa OR74A | AdoMet-dependent rRNA methyltransferase spb1 | protein | length=831	NCU03669	Neurospora crassa OR74A_rev.fasta	93961.6	1	5	6	6	0.0003	0.0758
Vince Research01272020	Uncategorized Sample	Vince	GPM22200021135	Cluster of | Neurospora crassa OR74A | BEAK-2 | protein | length=805 (NCU07139)	| Neurospora crassa OR74A | BEAK-2 | protein | length=805	NCU07139	Neurospora crassa OR74A_rev.fasta	89102.7	1	5	5	5	0.0002	0.0758
Vince Research01272020	Uncategorized Sample	Vince	GPM22200021135	Cluster of | Neurospora crassa OR74A | Cullin binding protein CanA, Cullin binding protein CanA, variant 1, Cullin binding protein CanA, variant 2 | protein | length=1348 (NCU08875)	| Neurospora crassa OR74A | Cullin binding protein CanA, Cullin binding protein CanA, variant 1, Cullin binding protein CanA, variant 2 | protein | length=1348	NCU08875	Neurospora crassa OR74A_rev.fasta	146436	1	8	8	8	0.0004	0.0757
Vince Research01272020	Uncategorized Sample	Vince	GPM22200021135	Cluster of | Neurospora crassa OR74A | ribosome biogenesis-59 | protein | length=779 (NCU03321)	| Neurospora crassa OR74A | ribosome biogenesis-59 | protein | length=779	NCU03321	Neurospora crassa OR74A_rev.fasta	87715.1	1	5	5	5	0.0002	0.0757
Vince Research01272020	Uncategorized Sample	Vince	GPM22200021135	Cluster of | Neurospora crassa OR74A | zinc finger transcription factor-16 | protein | length=304 (NCU00723)	| Neurospora crassa OR74A | zinc finger transcription factor-16 | protein | length=304	NCU00723	Neurospora crassa OR74A_rev.fasta	34536.3	1	2	2	2	0.0001	0.0757
Vince Research01272020	Uncategorized Sample	Vince	GPM22200021135	Cluster of | Neurospora crassa OR74A | neutral trehalase | protein | length=744 (NCU04221)	| Neurospora crassa OR74A | neutral trehalase | protein | length=744	NCU04221	Neurospora crassa OR74A_rev.fasta	85972.2	1	5	5	5	0.0002	0.0753
Vince Research01272020	Uncategorized Sample	Vince	GPM22200021135	Cluster of | Neurospora crassa OR74A | recombination-12 | protein | length=478 (NCU11357)	| Neurospora crassa OR74A | recombination-12 | protein | length=478	NCU11357	Neurospora crassa OR74A_rev.fasta	51301.6	1	3	3	3	0.0001	0.0753
Vince Research01272020	Uncategorized Sample	Vince	GPM22200021135	Cluster of | Neurospora crassa OR74A | CobW domain-containing protein | protein | length=386 (NCU03781)	| Neurospora crassa OR74A | CobW domain-containing protein | protein | length=386	NCU03781	Neurospora crassa OR74A_rev.fasta	42425.3	1	2	2	2	0.0001	0.0751
Vince Research01272020	Uncategorized Sample	Vince	GPM22200021135	Cluster of | Neurospora crassa OR74A | U3 small nucleolar RNA-associated protein 10 | protein | length=1788 (NCU00336)	| Neurospora crassa OR74A | U3 small nucleolar RNA-associated protein 10 | protein | length=1788	NCU00336	Neurospora crassa OR74A_rev.fasta	196898	1	9	9	9	0.0004	0.0749
Vince Research01272020	Uncategorized Sample	Vince	GPM22200021135	Cluster of | Neurospora crassa OR74A | hypothetical protein | protein | length=734 (NCU04862)	| Neurospora crassa OR74A | hypothetical protein | protein | length=734	NCU04862	Neurospora crassa OR74A_rev.fasta	78462.9	1	3	3	3	0.0001	0.0749
Vince Research01272020	Uncategorized Sample	Vince	GPM22200021135	Cluster of | Neurospora crassa OR74A | polyadenylate-binding protein | protein | length=764 (NCU04799)	| Neurospora crassa OR74A | polyadenylate-binding protein | protein | length=764	NCU04799	Neurospora crassa OR74A_rev.fasta	82318	1	4	4	4	0.0002	0.0746
Vince Research01272020	Uncategorized Sample	Vince	GPM22200021135	Cluster of | Neurospora crassa OR74A | dienelactone hydrolase-1 | protein | length=255 (NCU02124)	| Neurospora crassa OR74A | dienelactone hydrolase-1 | protein | length=255	NCU02124	Neurospora crassa OR74A_rev.fasta	28518.8	1	2	2	2	0.0001	0.0745
Vince Research01272020	Uncategorized Sample	Vince	GPM22200021135	Cluster of | Neurospora crassa OR74A | proliferating cell nuclear antigen | protein | length=259 (NCU09239)	| Neurospora crassa OR74A | proliferating cell nuclear antigen | protein | length=259	NCU09239	Neurospora crassa OR74A_rev.fasta	28649.6	1	2	2	2	0.0001	0.0734
Vince Research01272020	Uncategorized Sample	Vince	GPM22200021135	Cluster of | Neurospora crassa OR74A | tyrosyl-tRNA synthetase | protein | length=669 (NCU03030)	| Neurospora crassa OR74A | tyrosyl-tRNA synthetase | protein | length=669	NCU03030	Neurospora crassa OR74A_rev.fasta	75424.3	1	4	4	4	0.0002	0.0732
Vince Research01272020	Uncategorized Sample	Vince	GPM22200021135	Cluster of Keratin, type I cytoskeletal 10 OS=Homo sapiens GN=KRT10 PE=1 SV=6 (sp|P13645|K1C10_HUMAN)	Keratin, type I cytoskeletal 15 OS=Ovis aries GN=KRT15 PE=2 SV=1	sp|O77727|K1C15_SHEEP	Neurospora crassa OR74A_rev.fasta	48771.9	1	1	1	9	0.0004	0.0728
Vince Research01272020	Uncategorized Sample	Vince	GPM22200021135	Cluster of | Neurospora crassa OR74A | vacuolar membrane ATPase 2 | protein | length=513 (NCU08515)	| Neurospora crassa OR74A | vacuolar membrane ATPase 2 | protein | length=513	NCU08515	Neurospora crassa OR74A_rev.fasta	56810.8	1	3	3	3	0.0001	0.0721
Vince Research01272020	Uncategorized Sample	Vince	GPM22200021135	Cluster of | Neurospora crassa OR74A | Swi4 | protein | length=833 (NCU07246)	| Neurospora crassa OR74A | Swi4 | protein | length=833	NCU07246	Neurospora crassa OR74A_rev.fasta	92498.5	1	6	6	6	0.0003	0.072
Vince Research01272020	Uncategorized Sample	Vince	GPM22200021135	Cluster of | Neurospora crassa OR74A | ATP-binding cassette sub-family F member 2 | protein | length=613 (NCU08920)	| Neurospora crassa OR74A | ATP-binding cassette sub-family F member 2 | protein | length=613	NCU08920	Neurospora crassa OR74A_rev.fasta	68324.1	1	3	3	3	0.0001	0.0718
Vince Research01272020	Uncategorized Sample	Vince	GPM22200021135	Cluster of | Neurospora crassa OR74A | hypothetical protein | protein | length=1609 (NCU00388)	| Neurospora crassa OR74A | hypothetical protein | protein | length=1609	NCU00388	Neurospora crassa OR74A_rev.fasta	182204	1	9	9	9	0.0004	0.0715
Vince Research01272020	Uncategorized Sample	Vince	GPM22200021135	Cluster of | Neurospora crassa OR74A | fatty acid elongase | protein | length=337 (NCU06694)	| Neurospora crassa OR74A | fatty acid elongase | protein | length=337	NCU06694	Neurospora crassa OR74A_rev.fasta	38504.6	1	2	2	2	0.0001	0.0712
Vince Research01272020	Uncategorized Sample	Vince	GPM22200021135	Cluster of | Neurospora crassa OR74A | Glucose-6-phosphate 1-dehydrogenase | protein | length=506 (NCU09111)	| Neurospora crassa OR74A | Glucose-6-phosphate 1-dehydrogenase | protein | length=506	NCU09111	Neurospora crassa OR74A_rev.fasta	58091	1	3	3	3	0.0001	0.0711
Vince Research01272020	Uncategorized Sample	Vince	GPM22200021135	Cluster of | Neurospora crassa OR74A | VTS1, VTS1, variant 1 | protein | length=620 (NCU00311)	| Neurospora crassa OR74A | VTS1, VTS1, variant 1 | protein | length=620	NCU00311	Neurospora crassa OR74A_rev.fasta	66843.6	1	2	2	2	0.0001	0.071
Vince Research01272020	Uncategorized Sample	Vince	GPM22200021135	Cluster of | Neurospora crassa OR74A | eukaryotic translation initiation factor 3 subunit EifCf | protein | length=369 (NCU01021)	| Neurospora crassa OR74A | eukaryotic translation initiation factor 3 subunit EifCf | protein | length=369	NCU01021	Neurospora crassa OR74A_rev.fasta	39693.8	1	2	2	2	0.0001	0.0705
Vince Research01272020	Uncategorized Sample	Vince	GPM22200021135	Cluster of | Neurospora crassa OR74A | hypothetical protein, hypothetical protein, variant 1 | protein | length=485 (NCU11372)	| Neurospora crassa OR74A | hypothetical protein, hypothetical protein, variant 1 | protein | length=485	NCU11372	Neurospora crassa OR74A_rev.fasta	52119.6	1	2	2	2	0.0001	0.0701
Vince Research01272020	Uncategorized Sample	Vince	GPM22200021135	Cluster of | Neurospora crassa OR74A | hypothetical protein | protein | length=716 (NCU03101)	| Neurospora crassa OR74A | hypothetical protein | protein | length=716	NCU03101	Neurospora crassa OR74A_rev.fasta	76352	1	3	3	3	0.0001	0.0698
Vince Research01272020	Uncategorized Sample	Vince	GPM22200021135	Cluster of | Neurospora crassa OR74A | serine/threonine protein kinase, serine/threonine protein kinase, variant 1 | protein | length=1363 (NCU06638)	| Neurospora crassa OR74A | serine/threonine protein kinase, serine/threonine protein kinase, variant 1 | protein | length=1363	NCU06638	Neurospora crassa OR74A_rev.fasta	146313	1	7	7	7	0.0003	0.0697
Vince Research01272020	Uncategorized Sample	Vince	GPM22200021135	Cluster of | Neurospora crassa OR74A | pescadillo | protein | length=663 (NCU00925)	| Neurospora crassa OR74A | pescadillo | protein | length=663	NCU00925	Neurospora crassa OR74A_rev.fasta	75295.7	1	4	4	4	0.0002	0.0694
Vince Research01272020	Uncategorized Sample	Vince	GPM22200021135	Cluster of | Neurospora crassa OR74A | hypothetical protein | protein | length=317 (NCU07942)	| Neurospora crassa OR74A | hypothetical protein | protein | length=317	NCU07942	Neurospora crassa OR74A_rev.fasta	35985.6	1	2	2	2	0.0001	0.0694
Vince Research01272020	Uncategorized Sample	Vince	GPM22200021135	Cluster of | Neurospora crassa OR74A | hypothetical protein, hypothetical protein, variant 1, hypothetical protein, variant 2 | protein | length=1249 (NCU05219)	| Neurospora crassa OR74A | hypothetical protein, hypothetical protein, variant 1, hypothetical protein, variant 2 | protein | length=1249	NCU05219	Neurospora crassa OR74A_rev.fasta	133514	1	5	6	6	0.0003	0.0689
Vince Research01272020	Uncategorized Sample	Vince	GPM22200021135	Cluster of | Neurospora crassa OR74A | transcription initiation factor-6 | protein | length=465 (NCU07757)	| Neurospora crassa OR74A | transcription initiation factor-6 | protein | length=465	NCU07757	Neurospora crassa OR74A_rev.fasta	51014	1	2	2	2	0.0001	0.0688
Vince Research01272020	Uncategorized Sample	Vince	GPM22200021135	Cluster of | Neurospora crassa OR74A | mito ribosomal protein S4 | protein | length=453 (NCU08296)	| Neurospora crassa OR74A | mito ribosomal protein S4 | protein | length=453	NCU08296	Neurospora crassa OR74A_rev.fasta	51523.5	1	3	3	3	0.0001	0.0684
Vince Research01272020	Uncategorized Sample	Vince	GPM22200021135	Cluster of | Neurospora crassa OR74A | Swi6 | protein | length=822 (NCU07587)	| Neurospora crassa OR74A | Swi6 | protein | length=822	NCU07587	Neurospora crassa OR74A_rev.fasta	89967.1	1	5	5	5	0.0002	0.0681
Vince Research01272020	Uncategorized Sample	Vince	GPM22200021135	Cluster of | Neurospora crassa OR74A | rRNA maturation-1 | protein | length=911 (NCU07393)	| Neurospora crassa OR74A | rRNA maturation-1 | protein | length=911	NCU07393	Neurospora crassa OR74A_rev.fasta	103586	1	5	5	5	0.0002	0.0681
Vince Research01272020	Uncategorized Sample	Vince	GPM22200021135	Cluster of | Neurospora crassa OR74A | exportin-1 | protein | length=1078 (NCU01820)	| Neurospora crassa OR74A | exportin-1 | protein | length=1078	NCU01820	Neurospora crassa OR74A_rev.fasta	123774	1	6	6	6	0.0003	0.0677
Vince Research01272020	Uncategorized Sample	Vince	GPM22200021135	Cluster of | Neurospora crassa OR74A | zinc finger transcription factor-37 | protein | length=710 (NCU07952)	| Neurospora crassa OR74A | zinc finger transcription factor-37 | protein | length=710	NCU07952	Neurospora crassa OR74A_rev.fasta	76489	1	4	4	4	0.0002	0.0676
Vince Research01272020	Uncategorized Sample	Vince	GPM22200021135	Cluster of | Neurospora crassa OR74A | cysteine desulfurase | protein | length=505 (NCU04636)	| Neurospora crassa OR74A | cysteine desulfurase | protein | length=505	NCU04636	Neurospora crassa OR74A_rev.fasta	55234.8	1	3	5	5	0.0002	0.0673
Vince Research01272020	Uncategorized Sample	Vince	GPM22200021135	Cluster of | Neurospora crassa OR74A | fungal specific transcription factor | protein | length=746 (NCU07788)	| Neurospora crassa OR74A | fungal specific transcription factor | protein | length=746	NCU07788	Neurospora crassa OR74A_rev.fasta	82580.7	1	3	3	3	0.0001	0.067
Vince Research01272020	Uncategorized Sample	Vince	GPM22200021135	Cluster of | Neurospora crassa OR74A | rRNA maturation-7 | protein | length=720 (NCU04485)	| Neurospora crassa OR74A | rRNA maturation-7 | protein | length=720	NCU04485	Neurospora crassa OR74A_rev.fasta	81508	1	4	4	4	0.0002	0.0667
Vince Research01272020	Uncategorized Sample	Vince	GPM22200021135	Cluster of | Neurospora crassa OR74A | hypothetical protein | protein | length=966 (NCU09499)	| Neurospora crassa OR74A | hypothetical protein | protein | length=966	NCU09499	Neurospora crassa OR74A_rev.fasta	105276	1	4	4	4	0.0002	0.0663
Vince Research01272020	Uncategorized Sample	Vince	GPM22200021135	Cluster of | Neurospora crassa OR74A | centromere protein C | protein | length=755 (NCU09609)	| Neurospora crassa OR74A | centromere protein C | protein | length=755	NCU09609	Neurospora crassa OR74A_rev.fasta	81754.8	1	4	4	4	0.0002	0.0662
Vince Research01272020	Uncategorized Sample	Vince	GPM22200021135	Cluster of | Neurospora crassa OR74A | actin | protein | length=439 (NCU01756)	| Neurospora crassa OR74A | actin | protein | length=439	NCU01756	Neurospora crassa OR74A_rev.fasta	47852.6	1	2	2	2	0.0001	0.0661
Vince Research01272020	Uncategorized Sample	Vince	GPM22200021135	Cluster of | Neurospora crassa OR74A | hypothetical protein | protein | length=594 (NCU05559)	| Neurospora crassa OR74A | hypothetical protein | protein | length=594	NCU05559	Neurospora crassa OR74A_rev.fasta	65496.4	1	2	2	2	0.0001	0.0657
Vince Research01272020	Uncategorized Sample	Vince	GPM22200021135	Cluster of | Neurospora crassa OR74A | hypothetical protein | protein | length=762 (NCU07543)	| Neurospora crassa OR74A | hypothetical protein | protein | length=762	NCU07543	Neurospora crassa OR74A_rev.fasta	81301.3	1	2	2	2	0.0001	0.0656
Vince Research01272020	Uncategorized Sample	Vince	GPM22200021135	Cluster of | Neurospora crassa OR74A | coatomer subunit gamma | protein | length=916 (NCU01992)	| Neurospora crassa OR74A | coatomer subunit gamma | protein | length=916	NCU01992	Neurospora crassa OR74A_rev.fasta	100941	1	5	5	5	0.0002	0.0655
Vince Research01272020	Uncategorized Sample	Vince	GPM22200021135	Cluster of | Neurospora crassa OR74A | rRNA maturation-11 | protein | length=445 (NCU01595)	| Neurospora crassa OR74A | rRNA maturation-11 | protein | length=445	NCU01595	Neurospora crassa OR74A_rev.fasta	50524	1	2	2	2	0.0001	0.0652
Vince Research01272020	Uncategorized Sample	Vince	GPM22200021135	Cluster of | Neurospora crassa OR74A | fatty acid synthase alpha subunit reductase, fatty acid synthase alpha subunit reductase, variant 1 | protein | length=1864 (NCU07308)	| Neurospora crassa OR74A | fatty acid synthase alpha subunit reductase, fatty acid synthase alpha subunit reductase, variant 1 | protein | length=1864	NCU07308	Neurospora crassa OR74A_rev.fasta	204938	1	10	10	10	0.0005	0.0649
Vince Research01272020	Uncategorized Sample	Vince	GPM22200021135	Cluster of | Neurospora crassa OR74A | guanine triphosphate binding-2 | protein | length=650 (NCU09513)	| Neurospora crassa OR74A | guanine triphosphate binding-2 | protein | length=650	NCU09513	Neurospora crassa OR74A_rev.fasta	70534.3	1	3	3	3	0.0001	0.0646
Vince Research01272020	Uncategorized Sample	Vince	GPM22200021135	Cluster of | Neurospora crassa OR74A | nuclear localization protein | protein | length=527 (NCU07290)	| Neurospora crassa OR74A | nuclear localization protein | protein | length=527	NCU07290	Neurospora crassa OR74A_rev.fasta	59366.8	1	2	2	2	0.0001	0.0645
Vince Research01272020	Uncategorized Sample	Vince	GPM22200021135	Cluster of | Neurospora crassa OR74A | 1,3-beta-glucanosyltransferase gel1 | protein | length=466 (NCU07253)	| Neurospora crassa OR74A | 1,3-beta-glucanosyltransferase gel1 | protein | length=466	NCU07253	Neurospora crassa OR74A_rev.fasta	49627.8	1	2	2	2	0.0001	0.0644
Vince Research01272020	Uncategorized Sample	Vince	GPM22200021135	Cluster of | Neurospora crassa OR74A | glutaminyl-peptide cyclotransferase-2 | protein | length=435 (NCU09018)	| Neurospora crassa OR74A | glutaminyl-peptide cyclotransferase-2 | protein | length=435	NCU09018	Neurospora crassa OR74A_rev.fasta	47456.4	1	2	2	2	0.0001	0.0644
Vince Research01272020	Uncategorized Sample	Vince	GPM22200021135	Cluster of | Neurospora crassa OR74A | DNA replication licensing factor Mcm6 | protein | length=972 (NCU05194)	| Neurospora crassa OR74A | DNA replication licensing factor Mcm6 | protein | length=972	NCU05194	Neurospora crassa OR74A_rev.fasta	105842	1	4	6	6	0.0003	0.0638
Vince Research01272020	Uncategorized Sample	Vince	GPM22200021135	Cluster of | Neurospora crassa OR74A | crossover junction endonuclease mus-81 | protein | length=645 (NCU07457)	| Neurospora crassa OR74A | crossover junction endonuclease mus-81 | protein | length=645	NCU07457	Neurospora crassa OR74A_rev.fasta	73226.3	1	3	4	4	0.0002	0.0636
Vince Research01272020	Uncategorized Sample	Vince	GPM22200021135	Cluster of | Neurospora crassa OR74A | RNA binding protein, RNA binding protein, variant 1 | protein | length=613 (NCU06684)	| Neurospora crassa OR74A | RNA binding protein, RNA binding protein, variant 1 | protein | length=613	NCU06684	Neurospora crassa OR74A_rev.fasta	65561.7	1	3	3	3	0.0001	0.0636
Vince Research01272020	Uncategorized Sample	Vince	GPM22200021135	Cluster of | Neurospora crassa OR74A | ATP-dependent protease La | protein | length=1107 (NCU05261)	| Neurospora crassa OR74A | ATP-dependent protease La | protein | length=1107	NCU05261	Neurospora crassa OR74A_rev.fasta	121203	1	5	6	6	0.0003	0.0632
Vince Research01272020	Uncategorized Sample	Vince	GPM22200021135	Cluster of | Neurospora crassa OR74A | coatomer beta subunit | protein | length=957 (NCU04404)	| Neurospora crassa OR74A | coatomer beta subunit | protein | length=957	NCU04404	Neurospora crassa OR74A_rev.fasta	106399	1	5	5	5	0.0002	0.0627
Vince Research01272020	Uncategorized Sample	Vince	GPM22200021135	Cluster of | Neurospora crassa OR74A | hypothetical protein, hypothetical protein, variant 1 | protein | length=367 (NCU05685)	| Neurospora crassa OR74A | hypothetical protein, hypothetical protein, variant 1 | protein | length=367	NCU05685	Neurospora crassa OR74A_rev.fasta	40517.9	1	2	3	3	0.0001	0.0627
Vince Research01272020	Uncategorized Sample	Vince	GPM22200021135	Cluster of | Neurospora crassa OR74A | 60S ribosomal protein L1 | protein | length=303 (NCU08893)	| Neurospora crassa OR74A | 60S ribosomal protein L1 | protein | length=303	NCU08893	Neurospora crassa OR74A_rev.fasta	33279.3	1	2	2	2	0.0001	0.0627
Vince Research01272020	Uncategorized Sample	Vince	GPM22200021135	Cluster of | Neurospora crassa OR74A | hypothetical protein | protein | length=528 (NCU02952)	| Neurospora crassa OR74A | hypothetical protein | protein | length=528	NCU02952	Neurospora crassa OR74A_rev.fasta	54449.8	1	2	2	2	0.0001	0.0625
Vince Research01272020	Uncategorized Sample	Vince	GPM22200021135	Cluster of | Neurospora crassa OR74A | Ketol-acid reductoisomerase | protein | length=402 (NCU03608)	| Neurospora crassa OR74A | Ketol-acid reductoisomerase | protein | length=402	NCU03608	Neurospora crassa OR74A_rev.fasta	44623.7	1	2	2	2	0.0001	0.0622
Vince Research01272020	Uncategorized Sample	Vince	GPM22200021135	Cluster of | Neurospora crassa OR74A | methylenetetrahydrofolate reductase 1 | protein | length=613 (NCU07690)	| Neurospora crassa OR74A | methylenetetrahydrofolate reductase 1 | protein | length=613	NCU07690	Neurospora crassa OR74A_rev.fasta	69863.4	1	3	3	3	0.0001	0.062
Vince Research01272020	Uncategorized Sample	Vince	GPM22200021135	Cluster of | Neurospora crassa OR74A | phosphorylcholine transferase | protein | length=534 (NCU03880)	| Neurospora crassa OR74A | phosphorylcholine transferase | protein | length=534	NCU03880	Neurospora crassa OR74A_rev.fasta	57354.8	1	2	2	3	0.0001	0.0618
Vince Research01272020	Uncategorized Sample	Vince	GPM22200021135	Cluster of | Neurospora crassa OR74A | protein kinase SNF1 | protein | length=722 (NCU04566)	| Neurospora crassa OR74A | protein kinase SNF1 | protein | length=722	NCU04566	Neurospora crassa OR74A_rev.fasta	81130.8	1	3	3	3	0.0001	0.0609
Vince Research01272020	Uncategorized Sample	Vince	GPM22200021135	Cluster of Keratin, type II cuticular Hb6 OS=Homo sapiens GN=KRT86 PE=1 SV=1 (sp|O43790|KRT86_HUMAN)	Keratin, type II cuticular Hb3 OS=Homo sapiens GN=KRT83 PE=1 SV=2	sp|P78385|KRT83_HUMAN	Neurospora crassa OR74A_rev.fasta	54194.9	0.681	0	0	2	0.0001	0.0609
Vince Research01272020	Uncategorized Sample	Vince	GPM22200021135	Cluster of | Neurospora crassa OR74A | WD repeat protein | protein | length=645 (NCU03961)	| Neurospora crassa OR74A | WD repeat protein | protein | length=645	NCU03961	Neurospora crassa OR74A_rev.fasta	72501.4	1	3	3	3	0.0001	0.0605
Vince Research01272020	Uncategorized Sample	Vince	GPM22200021135	Cluster of | Neurospora crassa OR74A | hypothetical protein | protein | length=648 (NCU06838)	| Neurospora crassa OR74A | hypothetical protein | protein | length=648	NCU06838	Neurospora crassa OR74A_rev.fasta	71044.3	1	2	2	2	0.0001	0.0602
Vince Research01272020	Uncategorized Sample	Vince	GPM22200021135	Cluster of | Neurospora crassa OR74A | acetyl-CoA acetyltransferase-1 | protein | length=399 (NCU02571)	| Neurospora crassa OR74A | acetyl-CoA acetyltransferase-1 | protein | length=399	NCU02571	Neurospora crassa OR74A_rev.fasta	41414.5	1	2	2	2	0.0001	0.0602
Vince Research01272020	Uncategorized Sample	Vince	GPM22200021135	Cluster of | Neurospora crassa OR74A | Telomere binding protein | protein | length=470 (NCU02644)	| Neurospora crassa OR74A | Telomere binding protein | protein | length=470	NCU02644	Neurospora crassa OR74A_rev.fasta	51020.1	1	2	3	3	0.0001	0.0596
Vince Research01272020	Uncategorized Sample	Vince	GPM22200021135	Cluster of | Neurospora crassa OR74A | nuclear division-60 | protein | length=369 (NCU08772)	| Neurospora crassa OR74A | nuclear division-60 | protein | length=369	NCU08772	Neurospora crassa OR74A_rev.fasta	40300.6	1	2	2	2	0.0001	0.0596
Vince Research01272020	Uncategorized Sample	Vince	GPM22200021135	Cluster of | Neurospora crassa OR74A | hypothetical protein | protein | length=443 (NCU05552)	| Neurospora crassa OR74A | hypothetical protein | protein | length=443	NCU05552	Neurospora crassa OR74A_rev.fasta	49676	1	2	2	2	0.0001	0.0587
Vince Research01272020	Uncategorized Sample	Vince	GPM22200021135	Cluster of | Neurospora crassa OR74A | glycyl-tRNA synthetase 1 | protein | length=732 (NCU00405)	| Neurospora crassa OR74A | glycyl-tRNA synthetase 1 | protein | length=732	NCU00405	Neurospora crassa OR74A_rev.fasta	81819.2	1	4	4	4	0.0002	0.0574
Vince Research01272020	Uncategorized Sample	Vince	GPM22200021135	Cluster of | Neurospora crassa OR74A | hypothetical protein | protein | length=732 (NCU02367)	| Neurospora crassa OR74A | hypothetical protein | protein | length=732	NCU02367	Neurospora crassa OR74A_rev.fasta	79209.9	1	2	2	2	0.0001	0.0574
Vince Research01272020	Uncategorized Sample	Vince	GPM22200021135	Cluster of | Neurospora crassa OR74A | DNA topoisomerase 2, DNA topoisomerase 2, variant 1 | protein | length=1923 (NCU06338)	| Neurospora crassa OR74A | DNA topoisomerase 2, DNA topoisomerase 2, variant 1 | protein | length=1923	NCU06338	Neurospora crassa OR74A_rev.fasta	213153	1	9	9	9	0.0004	0.0572
Vince Research01272020	Uncategorized Sample	Vince	GPM22200021135	Cluster of | Neurospora crassa OR74A | hypothetical protein | protein | length=577 (NCU03905)	| Neurospora crassa OR74A | hypothetical protein | protein | length=577	NCU03905	Neurospora crassa OR74A_rev.fasta	63042.6	1	3	4	4	0.0002	0.0572
Vince Research01272020	Uncategorized Sample	Vince	GPM22200021135	Cluster of | Neurospora crassa OR74A | hypothetical protein | protein | length=441 (NCU10376)	| Neurospora crassa OR74A | hypothetical protein | protein | length=441	NCU10376	Neurospora crassa OR74A_rev.fasta	48663.3	1	2	2	2	0.0001	0.0567
Vince Research01272020	Uncategorized Sample	Vince	GPM22200021135	Cluster of | Neurospora crassa OR74A | thyroid hormone receptor interactor 12, thyroid hormone receptor interactor 12, variant 1, thyroid hormone receptor interactor 12, variant 2, thyroid hormone receptor interactor 12, variant 3 | protein | length=202	| Neurospora crassa OR74A | thyroid hormone receptor interactor 12, thyroid hormone receptor interactor 12, variant 1, thyroid hormone receptor interactor 12, variant 2, thyroid hormone receptor interactor 12, variant 3 | protein | length=2020	NCU09866	Neurospora crassa OR74A_rev.fasta	220361	1	9	9	9	0.0004	0.0564
Vince Research01272020	Uncategorized Sample	Vince	GPM22200021135	Cluster of | Neurospora crassa OR74A | hypothetical protein, hypothetical protein, variant 1 | protein | length=1707 (NCU05375)	| Neurospora crassa OR74A | hypothetical protein, hypothetical protein, variant 1 | protein | length=1707	NCU05375	Neurospora crassa OR74A_rev.fasta	186075	1	7	7	7	0.0003	0.0562
Vince Research01272020	Uncategorized Sample	Vince	GPM22200021135	Cluster of | Neurospora crassa OR74A | nuclear division-44 | protein | length=997 (NCU07313)	| Neurospora crassa OR74A | nuclear division-44 | protein | length=997	NCU07313	Neurospora crassa OR74A_rev.fasta	110316	1	5	5	5	0.0002	0.0562
Vince Research01272020	Uncategorized Sample	Vince	GPM22200021135	Cluster of | Neurospora crassa OR74A | ATP-dependent RNA helicase dhh-1 | protein | length=569 (NCU06149)	| Neurospora crassa OR74A | ATP-dependent RNA helicase dhh-1 | protein | length=569	NCU06149	Neurospora crassa OR74A_rev.fasta	63735.8	1	3	3	3	0.0001	0.0562
Vince Research01272020	Uncategorized Sample	Vince	GPM22200021135	Cluster of | Neurospora crassa OR74A | SWI-SNF complex subunit | protein | length=570 (NCU03572)	| Neurospora crassa OR74A | SWI-SNF complex subunit | protein | length=570	NCU03572	Neurospora crassa OR74A_rev.fasta	63814.8	1	3	4	4	0.0002	0.0561
Vince Research01272020	Uncategorized Sample	Vince	GPM22200021135	Cluster of | Neurospora crassa OR74A | ATP-dependent helicase NAM7 | protein | length=1093 (NCU04242)	| Neurospora crassa OR74A | ATP-dependent helicase NAM7 | protein | length=1093	NCU04242	Neurospora crassa OR74A_rev.fasta	120089	1	5	6	6	0.0003	0.0558
Vince Research01272020	Uncategorized Sample	Vince	GPM22200021135	Cluster of | Neurospora crassa OR74A | pre-mRNA-splicing factor cwc-26 | protein | length=377 (NCU04362)	| Neurospora crassa OR74A | pre-mRNA-splicing factor cwc-26 | protein | length=377	NCU04362	Neurospora crassa OR74A_rev.fasta	41637.1	1	2	2	2	0.0001	0.0557
Vince Research01272020	Uncategorized Sample	Vince	GPM22200021135	Cluster of | Neurospora crassa OR74A | chromosome segregation protein sudA | protein | length=1204 (NCU07554)	| Neurospora crassa OR74A | chromosome segregation protein sudA | protein | length=1204	NCU07554	Neurospora crassa OR74A_rev.fasta	138393	1	5	5	5	0.0002	0.0556
Vince Research01272020	Uncategorized Sample	Vince	GPM22200021135	Cluster of | Neurospora crassa OR74A | metalloprotease-15 | protein | length=486 (NCU05160)	| Neurospora crassa OR74A | metalloprotease-15 | protein | length=486	NCU05160	Neurospora crassa OR74A_rev.fasta	55277	1	2	2	2	0.0001	0.0556
Vince Research01272020	Uncategorized Sample	Vince	GPM22200021135	Cluster of | Neurospora crassa OR74A | nuclear division-42 | protein | length=616 (NCU07984)	| Neurospora crassa OR74A | nuclear division-42 | protein | length=616	NCU07984	Neurospora crassa OR74A_rev.fasta	66071.6	1	2	2	2	0.0001	0.0552
Vince Research01272020	Uncategorized Sample	Vince	GPM22200021135	Cluster of | Neurospora crassa OR74A | ABC transporter-14 | protein | length=694 (NCU05226)	| Neurospora crassa OR74A | ABC transporter-14 | protein | length=694	NCU05226	Neurospora crassa OR74A_rev.fasta	76025.2	1	3	3	3	0.0001	0.0548
Vince Research01272020	Uncategorized Sample	Vince	GPM22200021135	Cluster of | Neurospora crassa OR74A | hypothetical protein | protein | length=1010 (NCU05536)	| Neurospora crassa OR74A | hypothetical protein | protein | length=1010	NCU05536	Neurospora crassa OR74A_rev.fasta	109957	1	4	4	4	0.0002	0.0545
Vince Research01272020	Uncategorized Sample	Vince	GPM22200021135	Cluster of | Neurospora crassa OR74A | T-complex protein 1 subunit epsilon | protein | length=550 (NCU03980)	| Neurospora crassa OR74A | T-complex protein 1 subunit epsilon | protein | length=550	NCU03980	Neurospora crassa OR74A_rev.fasta	60008.2	1	2	2	2	0.0001	0.0545
Vince Research01272020	Uncategorized Sample	Vince	GPM22200021135	Cluster of | Neurospora crassa OR74A | DNA-directed RNA polymerase III largest subunit | protein | length=1533 (NCU03986)	| Neurospora crassa OR74A | DNA-directed RNA polymerase III largest subunit | protein | length=1533	NCU03986	Neurospora crassa OR74A_rev.fasta	170725	1	6	7	7	0.0003	0.0541
Vince Research01272020	Uncategorized Sample	Vince	GPM22200021135	Cluster of | Neurospora crassa OR74A | karyopherin Kap123 | protein | length=1094 (NCU05650)	| Neurospora crassa OR74A | karyopherin Kap123 | protein | length=1094	NCU05650	Neurospora crassa OR74A_rev.fasta	120702	1	4	4	4	0.0002	0.0539
Vince Research01272020	Uncategorized Sample	Vince	GPM22200021135	Cluster of | Neurospora crassa OR74A | nonsense-mediated mRNA decay protein 3 | protein | length=519 (NCU08663)	| Neurospora crassa OR74A | nonsense-mediated mRNA decay protein 3 | protein | length=519	NCU08663	Neurospora crassa OR74A_rev.fasta	58372.6	1	2	2	2	0.0001	0.0539
Vince Research01272020	Uncategorized Sample	Vince	GPM22200021135	Cluster of | Neurospora crassa OR74A | hypothetical protein | protein | length=1115 (NCU00445)	| Neurospora crassa OR74A | hypothetical protein | protein | length=1115	NCU00445	Neurospora crassa OR74A_rev.fasta	121176	1	4	4	4	0.0002	0.0538
Vince Research01272020	Uncategorized Sample	Vince	GPM22200021135	Cluster of | Neurospora crassa OR74A | clathrin heavy chain | protein | length=1678 (NCU02510)	| Neurospora crassa OR74A | clathrin heavy chain | protein | length=1678	NCU02510	Neurospora crassa OR74A_rev.fasta	190326	1	7	8	8	0.0004	0.0536
Vince Research01272020	Uncategorized Sample	Vince	GPM22200021135	Cluster of | Neurospora crassa OR74A | Homoserine kinase | protein | length=358 (NCU04277)	| Neurospora crassa OR74A | Homoserine kinase | protein | length=358	NCU04277	Neurospora crassa OR74A_rev.fasta	38660.2	1	2	3	3	0.0001	0.0531
Vince Research01272020	Uncategorized Sample	Vince	GPM22200021135	Cluster of | Neurospora crassa OR74A | U2 snRNP component prp10 | protein | length=1215 (NCU03042)	| Neurospora crassa OR74A | U2 snRNP component prp10 | protein | length=1215	NCU03042	Neurospora crassa OR74A_rev.fasta	135246	1	4	4	4	0.0002	0.0527
Vince Research01272020	Uncategorized Sample	Vince	GPM22200021135	Cluster of | Neurospora crassa OR74A | hypothetical protein | protein | length=1226 (NCU01247)	| Neurospora crassa OR74A | hypothetical protein | protein | length=1226	NCU01247	Neurospora crassa OR74A_rev.fasta	136029	1	5	5	5	0.0002	0.0522
Vince Research01272020	Uncategorized Sample	Vince	GPM22200021135	Cluster of | Neurospora crassa OR74A | calcium-transporting ATPase sarcoplasmic/endoplasmic reticulum type | protein | length=997 (NCU03305)	| Neurospora crassa OR74A | calcium-transporting ATPase sarcoplasmic/endoplasmic reticulum type | protein | length=997	NCU03305	Neurospora crassa OR74A_rev.fasta	107677	1	3	3	3	0.0001	0.0522
Vince Research01272020	Uncategorized Sample	Vince	GPM22200021135	Cluster of | Neurospora crassa OR74A | Serine hydroxymethyltransferase | protein | length=480 (NCU02274)	| Neurospora crassa OR74A | Serine hydroxymethyltransferase | protein | length=480	NCU02274	Neurospora crassa OR74A_rev.fasta	52978.4	1	2	2	2	0.0001	0.0521
Vince Research01272020	Uncategorized Sample	Vince	GPM22200021135	Cluster of | Neurospora crassa OR74A | hypothetical protein | protein | length=1048 (NCU01768)	| Neurospora crassa OR74A | hypothetical protein | protein | length=1048	NCU01768	Neurospora crassa OR74A_rev.fasta	121936	1	3	3	3	0.0001	0.0515
Vince Research01272020	Uncategorized Sample	Vince	GPM22200021135	Cluster of | Neurospora crassa OR74A | recombination-11 | protein | length=739 (NCU06826)	| Neurospora crassa OR74A | recombination-11 | protein | length=739	NCU06826	Neurospora crassa OR74A_rev.fasta	82006.4	1	3	3	3	0.0001	0.0514
Vince Research01272020	Uncategorized Sample	Vince	GPM22200021135	Cluster of | Neurospora crassa OR74A | hypothetical protein | protein | length=516 (NCU10044)	| Neurospora crassa OR74A | hypothetical protein | protein | length=516	NCU10044	Neurospora crassa OR74A_rev.fasta	56366.5	1	2	2	2	0.0001	0.0504
Vince Research01272020	Uncategorized Sample	Vince	GPM22200021135	Cluster of | Neurospora crassa OR74A | serine protease-12 | protein | length=596 (NCU11129)	| Neurospora crassa OR74A | serine protease-12 | protein | length=596	NCU11129	Neurospora crassa OR74A_rev.fasta	66136.8	1	2	2	2	0.0001	0.0503
Vince Research01272020	Uncategorized Sample	Vince	GPM22200021135	Cluster of | Neurospora crassa OR74A | dim2-associated protein 1, dim2-associated protein 1, variant 1, dim2-associated protein 1, variant 2 | protein | length=1752 (NCU04258)	| Neurospora crassa OR74A | dim2-associated protein 1, dim2-associated protein 1, variant 1, dim2-associated protein 1, variant 2 | protein | length=1752	NCU04258	Neurospora crassa OR74A_rev.fasta	191078	1	5	5	5	0.0002	0.0502
Vince Research01272020	Uncategorized Sample	Vince	GPM22200021135	Cluster of | Neurospora crassa OR74A | phophatase 2C family protein | protein | length=622 (NCU01767)	| Neurospora crassa OR74A | phophatase 2C family protein | protein | length=622	NCU01767	Neurospora crassa OR74A_rev.fasta	67182.3	1	2	2	2	0.0001	0.0498
Vince Research01272020	Uncategorized Sample	Vince	GPM22200021135	Cluster of | Neurospora crassa OR74A | ornithine-N5-oxygenase, ornithine-N5-oxygenase, variant 1 | protein | length=526 (NCU07117)	| Neurospora crassa OR74A | ornithine-N5-oxygenase, ornithine-N5-oxygenase, variant 1 | protein | length=526	NCU07117	Neurospora crassa OR74A_rev.fasta	58250	1	2	2	2	0.0001	0.0494
Vince Research01272020	Uncategorized Sample	Vince	GPM22200021135	Cluster of | Neurospora crassa OR74A | acyl-CoA dehydrogenase family member 11 | protein | length=451 (NCU01181)	| Neurospora crassa OR74A | acyl-CoA dehydrogenase family member 11 | protein | length=451	NCU01181	Neurospora crassa OR74A_rev.fasta	50051.4	1	2	2	2	0.0001	0.0488
Vince Research01272020	Uncategorized Sample	Vince	GPM22200021135	Cluster of | Neurospora crassa OR74A | ATP-dependent RNA helicase ded-1 | protein | length=688 (NCU01369)	| Neurospora crassa OR74A | ATP-dependent RNA helicase ded-1 | protein | length=688	NCU01369	Neurospora crassa OR74A_rev.fasta	72057.1	1	2	2	3	0.0001	0.048
Vince Research01272020	Uncategorized Sample	Vince	GPM22200021135	Cluster of | Neurospora crassa OR74A | histone deacetylase HosB | protein | length=1212 (NCU07018)	| Neurospora crassa OR74A | histone deacetylase HosB | protein | length=1212	NCU07018	Neurospora crassa OR74A_rev.fasta	130306	1	3	3	3	0.0001	0.0479
Vince Research01272020	Uncategorized Sample	Vince	GPM22200021135	Cluster of | Neurospora crassa OR74A | Wdr1p | protein | length=879 (NCU00650)	| Neurospora crassa OR74A | Wdr1p | protein | length=879	NCU00650	Neurospora crassa OR74A_rev.fasta	96786.7	1	3	3	3	0.0001	0.0478
Vince Research01272020	Uncategorized Sample	Vince	GPM22200021135	Cluster of | Neurospora crassa OR74A | alpha | protein | length=523 (NCU09715)	| Neurospora crassa OR74A | alpha | protein | length=523	NCU09715	Neurospora crassa OR74A_rev.fasta	58807.6	1	2	2	2	0.0001	0.0478
Vince Research01272020	Uncategorized Sample	Vince	GPM22200021135	Cluster of | Neurospora crassa OR74A | Sterol regulatory element binding protein sah-2, putative | protein | length=1074 (NCU04731)	| Neurospora crassa OR74A | Sterol regulatory element binding protein sah-2, putative | protein | length=1074	NCU04731	Neurospora crassa OR74A_rev.fasta	117551	1	4	7	8	0.0004	0.0475
Vince Research01272020	Uncategorized Sample	Vince	GPM22200021135	Cluster of | Neurospora crassa OR74A | hypothetical protein | protein | length=1021 (NCU08317)	| Neurospora crassa OR74A | hypothetical protein | protein | length=1021	NCU08317	Neurospora crassa OR74A_rev.fasta	111370	1	3	3	3	0.0001	0.047
Vince Research01272020	Uncategorized Sample	Vince	GPM22200021135	Cluster of | Neurospora crassa OR74A | isoleucine + valine-3 | protein | length=689 (NCU07982)	| Neurospora crassa OR74A | isoleucine + valine-3 | protein | length=689	NCU07982	Neurospora crassa OR74A_rev.fasta	74621.4	1	2	2	2	0.0001	0.0464
Vince Research01272020	Uncategorized Sample	Vince	GPM22200021135	Cluster of | Neurospora crassa OR74A | protein kinase | protein | length=757 (NCU04335)	| Neurospora crassa OR74A | protein kinase | protein | length=757	NCU04335	Neurospora crassa OR74A_rev.fasta	83773.7	1	3	3	3	0.0001	0.0462
Vince Research01272020	Uncategorized Sample	Vince	GPM22200021135	Cluster of | Neurospora crassa OR74A | hypothetical protein | protein | length=1043 (NCU03892)	| Neurospora crassa OR74A | hypothetical protein | protein | length=1043	NCU03892	Neurospora crassa OR74A_rev.fasta	116112	1	4	4	4	0.0002	0.046
Vince Research01272020	Uncategorized Sample	Vince	GPM22200021135	Cluster of | Neurospora crassa OR74A | mitochondrial nuclease-1 | protein | length=850 (NCU01304)	| Neurospora crassa OR74A | mitochondrial nuclease-1 | protein | length=850	NCU01304	Neurospora crassa OR74A_rev.fasta	96709	1	2	2	2	0.0001	0.0459
Vince Research01272020	Uncategorized Sample	Vince	GPM22200021135	Cluster of | Neurospora crassa OR74A | protein phosphatase PP2A regulatory subunit A | protein | length=635 (NCU00488)	| Neurospora crassa OR74A | protein phosphatase PP2A regulatory subunit A | protein | length=635	NCU00488	Neurospora crassa OR74A_rev.fasta	70418.9	1	2	2	2	0.0001	0.0457
Vince Research01272020	Uncategorized Sample	Vince	GPM22200021135	Cluster of | Neurospora crassa OR74A | polarity defective-5 | protein | length=922 (NCU03628)	| Neurospora crassa OR74A | polarity defective-5 | protein | length=922	NCU03628	Neurospora crassa OR74A_rev.fasta	100981	1	3	3	3	0.0001	0.0456
Vince Research01272020	Uncategorized Sample	Vince	GPM22200021135	Cluster of | Neurospora crassa OR74A | D-3-phosphoglycerate dehydrogenase 1 | protein | length=466 (NCU01439)	| Neurospora crassa OR74A | D-3-phosphoglycerate dehydrogenase 1 | protein | length=466	NCU01439	Neurospora crassa OR74A_rev.fasta	50996	1	2	2	2	0.0001	0.0451
Vince Research01272020	Uncategorized Sample	Vince	GPM22200021135	Cluster of | Neurospora crassa OR74A | WD repeat containing protein 57 | protein | length=556 (NCU09843)	| Neurospora crassa OR74A | WD repeat containing protein 57 | protein | length=556	NCU09843	Neurospora crassa OR74A_rev.fasta	59922.7	1	2	2	2	0.0001	0.045
Vince Research01272020	Uncategorized Sample	Vince	GPM22200021135	Cluster of | Neurospora crassa OR74A | transcription initiation factor-7 | protein | length=801 (NCU04136)	| Neurospora crassa OR74A | transcription initiation factor-7 | protein | length=801	NCU04136	Neurospora crassa OR74A_rev.fasta	86130.1	1	3	3	3	0.0001	0.0449
Vince Research01272020	Uncategorized Sample	Vince	GPM22200021135	Cluster of | Neurospora crassa OR74A | Sas10/Utp3 family protein | protein | length=627 (NCU00301)	| Neurospora crassa OR74A | Sas10/Utp3 family protein | protein | length=627	NCU00301	Neurospora crassa OR74A_rev.fasta	70832	1	2	2	2	0.0001	0.0447
Vince Research01272020	Uncategorized Sample	Vince	GPM22200021135	Cluster of | Neurospora crassa OR74A | cap binding protein | protein | length=829 (NCU04187)	| Neurospora crassa OR74A | cap binding protein | protein | length=829	NCU04187	Neurospora crassa OR74A_rev.fasta	92653.8	1	3	3	3	0.0001	0.0446
Vince Research01272020	Uncategorized Sample	Vince	GPM22200021135	Cluster of | Neurospora crassa OR74A | CTP synthase | protein | length=585 (NCU00261)	| Neurospora crassa OR74A | CTP synthase | protein | length=585	NCU00261	Neurospora crassa OR74A_rev.fasta	64770	1	2	2	2	0.0001	0.0444
Vince Research01272020	Uncategorized Sample	Vince	GPM22200021135	Cluster of | Neurospora crassa OR74A | Prolyl-tRNA synthetase | protein | length=587 (NCU09892)	| Neurospora crassa OR74A | Prolyl-tRNA synthetase | protein | length=587	NCU09892	Neurospora crassa OR74A_rev.fasta	65086.9	1	2	2	2	0.0001	0.0443
Vince Research01272020	Uncategorized Sample	Vince	GPM22200021135	Cluster of | Neurospora crassa OR74A | kinesin heavy chain | protein | length=928 (NCU09730)	| Neurospora crassa OR74A | kinesin heavy chain | protein | length=928	NCU09730	Neurospora crassa OR74A_rev.fasta	102413	1	2	2	2	0.0001	0.0442
Vince Research01272020	Uncategorized Sample	Vince	GPM22200021135	Cluster of | Neurospora crassa OR74A | gephyrin, gephyrin, variant 1 | protein | length=726 (NCU09746)	| Neurospora crassa OR74A | gephyrin, gephyrin, variant 1 | protein | length=726	NCU09746	Neurospora crassa OR74A_rev.fasta	75855.5	1	3	3	3	0.0001	0.0441
Vince Research01272020	Uncategorized Sample	Vince	GPM22200021135	Cluster of | Neurospora crassa OR74A | ubiquinol-cytochrome-c reductase subunit beta | protein | length=476 (NCU02549)	| Neurospora crassa OR74A | ubiquinol-cytochrome-c reductase subunit beta | protein | length=476	NCU02549	Neurospora crassa OR74A_rev.fasta	52557.3	1	2	2	2	0.0001	0.0441
Vince Research01272020	Uncategorized Sample	Vince	GPM22200021135	Cluster of | Neurospora crassa OR74A | hypothetical protein | protein | length=1012 (NCU01584)	| Neurospora crassa OR74A | hypothetical protein | protein | length=1012	NCU01584	Neurospora crassa OR74A_rev.fasta	112791	1	3	3	3	0.0001	0.0435
Vince Research01272020	Uncategorized Sample	Vince	GPM22200021135	Cluster of | Neurospora crassa OR74A | U3 small nucleolar ribonucleoprotein mpp10 | protein | length=792 (NCU03952)	| Neurospora crassa OR74A | U3 small nucleolar ribonucleoprotein mpp10 | protein | length=792	NCU03952	Neurospora crassa OR74A_rev.fasta	87429	1	3	3	3	0.0001	0.0429
Vince Research01272020	Uncategorized Sample	Vince	GPM22200021135	Cluster of | Neurospora crassa OR74A | serine/threonine-protein phosphatase 2B catalytic subunit, serine/threonine-protein phosphatase 2B catalytic subunit, variant 1 | protein | length=562 (NCU03804)	| Neurospora crassa OR74A | serine/threonine-protein phosphatase 2B catalytic subunit, serine/threonine-protein phosphatase 2B catalytic subunit, variant 1 | protein | length=562	NCU03804	Neurospora crassa OR74A_rev.fasta	64470.9	1	2	2	2	0.0001	0.0427
Vince Research01272020	Uncategorized Sample	Vince	GPM22200021135	Cluster of | Neurospora crassa OR74A | hypothetical protein | protein | length=1059 (NCU09449)	| Neurospora crassa OR74A | hypothetical protein | protein | length=1059	NCU09449	Neurospora crassa OR74A_rev.fasta	116244	1	3	3	3	0.0001	0.0425
Vince Research01272020	Uncategorized Sample	Vince	GPM22200021135	Cluster of | Neurospora crassa OR74A | hypothetical protein | protein | length=730 (NCU02386)	| Neurospora crassa OR74A | hypothetical protein | protein | length=730	NCU02386	Neurospora crassa OR74A_rev.fasta	81510.2	1	2	2	2	0.0001	0.0425
Vince Research01272020	Uncategorized Sample	Vince	GPM22200021135	Cluster of | Neurospora crassa OR74A | SET-4 | protein | length=948 (NCU04389)	| Neurospora crassa OR74A | SET-4 | protein | length=948	NCU04389	Neurospora crassa OR74A_rev.fasta	102504	1	2	2	2	0.0001	0.0422
Vince Research01272020	Uncategorized Sample	Vince	GPM22200021135	Cluster of | Neurospora crassa OR74A | hypothetical protein | protein | length=592 (NCU00127)	| Neurospora crassa OR74A | hypothetical protein | protein | length=592	NCU00127	Neurospora crassa OR74A_rev.fasta	63419.6	1	2	2	2	0.0001	0.0422
Vince Research01272020	Uncategorized Sample	Vince	GPM22200021135	Cluster of | Neurospora crassa OR74A | ATP-dependent RNA helicase dbp-10 | protein | length=934 (NCU07712)	| Neurospora crassa OR74A | ATP-dependent RNA helicase dbp-10 | protein | length=934	NCU07712	Neurospora crassa OR74A_rev.fasta	103657	1	3	3	3	0.0001	0.0418
Vince Research01272020	Uncategorized Sample	Vince	GPM22200021135	Cluster of | Neurospora crassa OR74A | DNA-directed RNA polymerase III polypeptide | protein | length=1155 (NCU01772)	| Neurospora crassa OR74A | DNA-directed RNA polymerase III polypeptide | protein | length=1155	NCU01772	Neurospora crassa OR74A_rev.fasta	129460	1	4	4	4	0.0002	0.0416
Vince Research01272020	Uncategorized Sample	Vince	GPM22200021135	Cluster of | Neurospora crassa OR74A | hypothetical protein | protein | length=651 (NCU04018)	| Neurospora crassa OR74A | hypothetical protein | protein | length=651	NCU04018	Neurospora crassa OR74A_rev.fasta	71433.7	1	2	2	2	0.0001	0.0415
Vince Research01272020	Uncategorized Sample	Vince	GPM22200021135	Cluster of | Neurospora crassa OR74A | ubiquitin ligase BRE1, ubiquitin ligase BRE1, variant 1 | protein | length=654 (NCU07544)	| Neurospora crassa OR74A | ubiquitin ligase BRE1, ubiquitin ligase BRE1, variant 1 | protein | length=654	NCU07544	Neurospora crassa OR74A_rev.fasta	74564.9	1	2	2	2	0.0001	0.0413
Vince Research01272020	Uncategorized Sample	Vince	GPM22200021135	Cluster of | Neurospora crassa OR74A | serine/threonine-protein kinase sck1, serine/threonine-protein kinase sck1, variant 1 | protein | length=753 (NCU03200)	| Neurospora crassa OR74A | serine/threonine-protein kinase sck1, serine/threonine-protein kinase sck1, variant 1 | protein | length=753	NCU03200	Neurospora crassa OR74A_rev.fasta	83198.4	1	2	2	2	0.0001	0.0412
Vince Research01272020	Uncategorized Sample	Vince	GPM22200021135	Cluster of | Neurospora crassa OR74A | helicase swr-1 | protein | length=1845 (NCU09993)	| Neurospora crassa OR74A | helicase swr-1 | protein | length=1845	NCU09993	Neurospora crassa OR74A_rev.fasta	206956	1	5	5	6	0.0003	0.0407
Vince Research01272020	Uncategorized Sample	Vince	GPM22200021135	Cluster of | Neurospora crassa OR74A | hypothetical protein | protein | length=1112 (NCU09898)	| Neurospora crassa OR74A | hypothetical protein | protein | length=1112	NCU09898	Neurospora crassa OR74A_rev.fasta	118099	1	3	3	3	0.0001	0.0405
Vince Research01272020	Uncategorized Sample	Vince	GPM22200021135	Cluster of | Neurospora crassa OR74A | hypothetical protein | protein | length=773 (NCU02006)	| Neurospora crassa OR74A | hypothetical protein | protein | length=773	NCU02006	Neurospora crassa OR74A_rev.fasta	81154.9	1	2	2	2	0.0001	0.0401
Vince Research01272020	Uncategorized Sample	Vince	GPM22200021135	Cluster of | Neurospora crassa OR74A | nuclear division-45 | protein | length=1031 (NCU06578)	| Neurospora crassa OR74A | nuclear division-45 | protein | length=1031	NCU06578	Neurospora crassa OR74A_rev.fasta	114374	1	3	3	3	0.0001	0.0398
Vince Research01272020	Uncategorized Sample	Vince	GPM22200021135	Cluster of | Neurospora crassa OR74A | hypothetical protein | protein | length=502 (NCU02191)	| Neurospora crassa OR74A | hypothetical protein | protein | length=502	NCU02191	Neurospora crassa OR74A_rev.fasta	57035	1	2	2	2	0.0001	0.0398
Vince Research01272020	Uncategorized Sample	Vince	GPM22200021135	Cluster of | Neurospora crassa OR74A | SAH-3 | protein | length=781 (NCU07535)	| Neurospora crassa OR74A | SAH-3 | protein | length=781	NCU07535	Neurospora crassa OR74A_rev.fasta	86540.9	1	2	2	2	0.0001	0.0397
Vince Research01272020	Uncategorized Sample	Vince	GPM22200021135	Cluster of | Neurospora crassa OR74A | protein kinase, protein kinase, variant 1 | protein | length=1250 (NCU06685)	| Neurospora crassa OR74A | protein kinase, protein kinase, variant 1 | protein | length=1250	NCU06685	Neurospora crassa OR74A_rev.fasta	138909	1	2	2	2	0.0001	0.0392
Vince Research01272020	Uncategorized Sample	Vince	GPM22200021135	Cluster of | Neurospora crassa OR74A | zinc finger transcription factor-43 | protein | length=843 (NCU09804)	| Neurospora crassa OR74A | zinc finger transcription factor-43 | protein | length=843	NCU09804	Neurospora crassa OR74A_rev.fasta	93693	1	2	2	2	0.0001	0.0391
Vince Research01272020	Uncategorized Sample	Vince	GPM22200021135	Cluster of | Neurospora crassa OR74A | pH-response transcription factor pacC/RIM101 | protein | length=621 (NCU00090)	| Neurospora crassa OR74A | pH-response transcription factor pacC/RIM101 | protein | length=621	NCU00090	Neurospora crassa OR74A_rev.fasta	67303	1	2	3	3	0.0001	0.0386
Vince Research01272020	Uncategorized Sample	Vince	GPM22200021135	Cluster of | Neurospora crassa OR74A | RNA polymerase-29 | protein | length=624 (NCU03560)	| Neurospora crassa OR74A | RNA polymerase-29 | protein | length=624	NCU03560	Neurospora crassa OR74A_rev.fasta	70927.5	1	2	3	3	0.0001	0.0385
Vince Research01272020	Uncategorized Sample	Vince	GPM22200021135	Cluster of | Neurospora crassa OR74A | actin binding protein-1 | protein | length=805 (NCU10073)	| Neurospora crassa OR74A | actin binding protein-1 | protein | length=805	NCU10073	Neurospora crassa OR74A_rev.fasta	84446.7	1	2	2	2	0.0001	0.0385
Vince Research01272020	Uncategorized Sample	Vince	GPM22200021135	Cluster of | Neurospora crassa OR74A | hypothetical protein | protein | length=2219 (NCU04512)	| Neurospora crassa OR74A | hypothetical protein | protein | length=2219	NCU04512	Neurospora crassa OR74A_rev.fasta	249930	1	6	7	7	0.0003	0.0383
Vince Research01272020	Uncategorized Sample	Vince	GPM22200021135	Cluster of | Neurospora crassa OR74A | Tryptophan synthetase | protein | length=708 (NCU08409)	| Neurospora crassa OR74A | Tryptophan synthetase | protein | length=708	NCU08409	Neurospora crassa OR74A_rev.fasta	76451.8	1	2	2	2	0.0001	0.0381
Vince Research01272020	Uncategorized Sample	Vince	GPM22200021135	Cluster of | Neurospora crassa OR74A | double-strand-break repair protein rad21 | protein | length=658 (NCU03291)	| Neurospora crassa OR74A | double-strand-break repair protein rad21 | protein | length=658	NCU03291	Neurospora crassa OR74A_rev.fasta	72579.1	1	2	2	2	0.0001	0.038
Vince Research01272020	Uncategorized Sample	Vince	GPM22200021135	Cluster of | Neurospora crassa OR74A | hypothetical protein | protein | length=1160 (NCU08879)	| Neurospora crassa OR74A | hypothetical protein | protein | length=1160	NCU08879	Neurospora crassa OR74A_rev.fasta	126017	1	3	3	3	0.0001	0.0379
Vince Research01272020	Uncategorized Sample	Vince	GPM22200021135	Cluster of | Neurospora crassa OR74A | mitochondrial ribosomal protein subunit S4 | protein | length=687 (NCU10311)	| Neurospora crassa OR74A | mitochondrial ribosomal protein subunit S4 | protein | length=687	NCU10311	Neurospora crassa OR74A_rev.fasta	73750.3	1	2	2	2	0.0001	0.0378
Vince Research01272020	Uncategorized Sample	Vince	GPM22200021135	Cluster of | Neurospora crassa OR74A | hypothetical protein, hypothetical protein, variant 1 | protein | length=480 (NCU03338)	| Neurospora crassa OR74A | hypothetical protein, hypothetical protein, variant 1 | protein | length=480	NCU03338	Neurospora crassa OR74A_rev.fasta	54348.7	1	2	2	2	0.0001	0.0375
Vince Research01272020	Uncategorized Sample	Vince	GPM22200021135	Cluster of | Neurospora crassa OR74A | porin-binding domain protein-5 | protein | length=591 (NCU07893)	| Neurospora crassa OR74A | porin-binding domain protein-5 | protein | length=591	NCU07893	Neurospora crassa OR74A_rev.fasta	64711	1	2	2	2	0.0001	0.0372
Vince Research01272020	Uncategorized Sample	Vince	GPM22200021135	Cluster of | Neurospora crassa OR74A | hypothetical protein | protein | length=893 (NCU03480)	| Neurospora crassa OR74A | hypothetical protein | protein | length=893	NCU03480	Neurospora crassa OR74A_rev.fasta	95705.4	1	2	2	2	0.0001	0.037
Vince Research01272020	Uncategorized Sample	Vince	GPM22200021135	Cluster of | Neurospora crassa OR74A | 1,4-alpha-glucan branching enzyme, 1,4-alpha-glucan branching enzyme, variant 1 | protein | length=705 (NCU05429)	| Neurospora crassa OR74A | 1,4-alpha-glucan branching enzyme, 1,4-alpha-glucan branching enzyme, variant 1 | protein | length=705	NCU05429	Neurospora crassa OR74A_rev.fasta	80526.6	1	2	2	2	0.0001	0.0369
Vince Research01272020	Uncategorized Sample	Vince	GPM22200021135	Cluster of | Neurospora crassa OR74A | RSC complex subunit | protein | length=1206 (NCU02354)	| Neurospora crassa OR74A | RSC complex subunit | protein | length=1206	NCU02354	Neurospora crassa OR74A_rev.fasta	137220	1	4	4	4	0.0002	0.0365
Vince Research01272020	Uncategorized Sample	Vince	GPM22200021135	Cluster of | Neurospora crassa OR74A | endoribonuclease ysh-1 | protein | length=850 (NCU03479)	| Neurospora crassa OR74A | endoribonuclease ysh-1 | protein | length=850	NCU03479	Neurospora crassa OR74A_rev.fasta	94080.3	1	2	2	2	0.0001	0.0365
Vince Research01272020	Uncategorized Sample	Vince	GPM22200021135	Cluster of | Neurospora crassa OR74A | hypothetical protein | protein | length=608 (NCU03649)	| Neurospora crassa OR74A | hypothetical protein | protein | length=608	NCU03649	Neurospora crassa OR74A_rev.fasta	67963.1	1	2	2	2	0.0001	0.0362
Vince Research01272020	Uncategorized Sample	Vince	GPM22200021135	Cluster of Serum albumin OS=Bos taurus GN=ALB PE=1 SV=4 (sp|P02769|ALBU_BOVIN)	Serum albumin OS=Bos taurus GN=ALB PE=1 SV=4	sp|P02769|ALBU_BOVIN	Neurospora crassa OR74A_rev.fasta	69294.2	1	2	2	2	0.0001	0.0362
Vince Research01272020	Uncategorized Sample	Vince	GPM22200021135	Cluster of | Neurospora crassa OR74A | mst2 | protein | length=1188 (NCU04782)	| Neurospora crassa OR74A | mst2 | protein | length=1188	NCU04782	Neurospora crassa OR74A_rev.fasta	130980	1	2	2	2	0.0001	0.0362
Vince Research01272020	Uncategorized Sample	Vince	GPM22200021135	Cluster of | Neurospora crassa OR74A | Mannosyl-oligosaccharide 1,2-alpha-mannosidase | protein | length=804 (NCU02778)	| Neurospora crassa OR74A | Mannosyl-oligosaccharide 1,2-alpha-mannosidase | protein | length=804	NCU02778	Neurospora crassa OR74A_rev.fasta	90273.2	1	2	2	2	0.0001	0.0361
Vince Research01272020	Uncategorized Sample	Vince	GPM22200021135	Cluster of | Neurospora crassa OR74A | Cystathionine gamma-synthase | protein | length=621 (NCU02430)	| Neurospora crassa OR74A | Cystathionine gamma-synthase | protein | length=621	NCU02430	Neurospora crassa OR74A_rev.fasta	68939.6	1	2	2	2	0.0001	0.0354
Vince Research01272020	Uncategorized Sample	Vince	GPM22200021135	Cluster of | Neurospora crassa OR74A | hypothetical protein | protein | length=623 (NCU05130)	| Neurospora crassa OR74A | hypothetical protein | protein | length=623	NCU05130	Neurospora crassa OR74A_rev.fasta	70503.4	1	2	2	2	0.0001	0.0353
Vince Research01272020	Uncategorized Sample	Vince	GPM22200021135	Cluster of | Neurospora crassa OR74A | guanine triphosphate binding-32 | protein | length=926 (NCU08499)	| Neurospora crassa OR74A | guanine triphosphate binding-32 | protein | length=926	NCU08499	Neurospora crassa OR74A_rev.fasta	101585	1	2	2	2	0.0001	0.0346
Vince Research01272020	Uncategorized Sample	Vince	GPM22200021135	Cluster of | Neurospora crassa OR74A | hypothetical protein | protein | length=976 (NCU02604)	| Neurospora crassa OR74A | hypothetical protein | protein | length=976	NCU02604	Neurospora crassa OR74A_rev.fasta	106256	1	2	2	2	0.0001	0.0338
Vince Research01272020	Uncategorized Sample	Vince	GPM22200021135	Cluster of | Neurospora crassa OR74A | nuclear division-43 | protein | length=959 (NCU04104)	| Neurospora crassa OR74A | nuclear division-43 | protein | length=959	NCU04104	Neurospora crassa OR74A_rev.fasta	107494	1	2	3	3	0.0001	0.0334
Vince Research01272020	Uncategorized Sample	Vince	GPM22200021135	Cluster of | Neurospora crassa OR74A | hypothetical protein | protein | length=1055 (NCU08334)	| Neurospora crassa OR74A | hypothetical protein | protein | length=1055	NCU08334	Neurospora crassa OR74A_rev.fasta	123592	1	3	3	3	0.0001	0.0332
Vince Research01272020	Uncategorized Sample	Vince	GPM22200021135	Cluster of | Neurospora crassa OR74A | hypothetical protein | protein | length=734 (NCU03367)	| Neurospora crassa OR74A | hypothetical protein | protein | length=734	NCU03367	Neurospora crassa OR74A_rev.fasta	82643.9	1	2	2	2	0.0001	0.0327
Vince Research01272020	Uncategorized Sample	Vince	GPM22200021135	Cluster of | Neurospora crassa OR74A | coatomer beta' subunit | protein | length=858 (NCU07319)	| Neurospora crassa OR74A | coatomer beta' subunit | protein | length=858	NCU07319	Neurospora crassa OR74A_rev.fasta	95936.1	1	2	2	2	0.0001	0.0326
Vince Research01272020	Uncategorized Sample	Vince	GPM22200021135	Cluster of | Neurospora crassa OR74A | hypothetical protein | protein | length=738 (NCU02683)	| Neurospora crassa OR74A | hypothetical protein | protein | length=738	NCU02683	Neurospora crassa OR74A_rev.fasta	81444.3	1	2	3	3	0.0001	0.0325
Vince Research01272020	Uncategorized Sample	Vince	GPM22200021135	Cluster of | Neurospora crassa OR74A | transcription factor-25 | protein | length=833 (NCU05308)	| Neurospora crassa OR74A | transcription factor-25 | protein | length=833	NCU05308	Neurospora crassa OR74A_rev.fasta	90201.5	1	2	2	2	0.0001	0.0324
Vince Research01272020	Uncategorized Sample	Vince	GPM22200021135	Cluster of | Neurospora crassa OR74A | PHD finger domain-containing protein | protein | length=1261 (NCU00045)	| Neurospora crassa OR74A | PHD finger domain-containing protein | protein | length=1261	NCU00045	Neurospora crassa OR74A_rev.fasta	138355	1	3	3	3	0.0001	0.0317
Vince Research01272020	Uncategorized Sample	Vince	GPM22200021135	Cluster of | Neurospora crassa OR74A | hypothetical protein | protein | length=663 (NCU03554)	| Neurospora crassa OR74A | hypothetical protein | protein | length=663	NCU03554	Neurospora crassa OR74A_rev.fasta	74188.6	1	2	2	2	0.0001	0.0317
Vince Research01272020	Uncategorized Sample	Vince	GPM22200021135	Cluster of | Neurospora crassa OR74A | sip-5 | protein | length=857 (NCU05589)	| Neurospora crassa OR74A | sip-5 | protein | length=857	NCU05589	Neurospora crassa OR74A_rev.fasta	90234.7	1	2	2	2	0.0001	0.0315
Vince Research01272020	Uncategorized Sample	Vince	GPM22200021135	Cluster of | Neurospora crassa OR74A | differentiation regulator | protein | length=798 (NCU06459)	| Neurospora crassa OR74A | differentiation regulator | protein | length=798	NCU06459	Neurospora crassa OR74A_rev.fasta	85768.9	1	2	2	2	0.0001	0.0313
Vince Research01272020	Uncategorized Sample	Vince	GPM22200021135	Cluster of | Neurospora crassa OR74A | WD domain-containing protein | protein | length=964 (NCU03051)	| Neurospora crassa OR74A | WD domain-containing protein | protein | length=964	NCU03051	Neurospora crassa OR74A_rev.fasta	107132	1	2	2	2	0.0001	0.0311
Vince Research01272020	Uncategorized Sample	Vince	GPM22200021135	Cluster of | Neurospora crassa OR74A | valyl-tRNA synthetase | protein | length=1093 (NCU01965)	| Neurospora crassa OR74A | valyl-tRNA synthetase | protein | length=1093	NCU01965	Neurospora crassa OR74A_rev.fasta	123356	1	2	2	2	0.0001	0.0302
Vince Research01272020	Uncategorized Sample	Vince	GPM22200021135	Cluster of | Neurospora crassa OR74A | eukaryotic translation initiation factor 3 | protein | length=591 (NCU07380)	| Neurospora crassa OR74A | eukaryotic translation initiation factor 3 | protein | length=591	NCU07380	Neurospora crassa OR74A_rev.fasta	64965.7	1	2	2	2	0.0001	0.0288
Vince Research01272020	Uncategorized Sample	Vince	GPM22200021135	Cluster of | Neurospora crassa OR74A | phosphatidylinositol 3-kinase 3 | protein | length=1948 (NCU09367)	| Neurospora crassa OR74A | phosphatidylinositol 3-kinase 3 | protein | length=1948	NCU09367	Neurospora crassa OR74A_rev.fasta	216171	1	5	5	5	0.0002	0.0287
Vince Research01272020	Uncategorized Sample	Vince	GPM22200021135	Cluster of | Neurospora crassa OR74A | hypothetical protein | protein | length=775 (NCU06118)	| Neurospora crassa OR74A | hypothetical protein | protein | length=775	NCU06118	Neurospora crassa OR74A_rev.fasta	87515.8	1	2	2	2	0.0001	0.0284
Vince Research01272020	Uncategorized Sample	Vince	GPM22200021135	Cluster of | Neurospora crassa OR74A | stress response protein nst-1 | protein | length=1226 (NCU08682)	| Neurospora crassa OR74A | stress response protein nst-1 | protein | length=1226	NCU08682	Neurospora crassa OR74A_rev.fasta	134831	1	2	2	2	0.0001	0.0277
Vince Research01272020	Uncategorized Sample	Vince	GPM22200021135	Cluster of | Neurospora crassa OR74A | Snf2 helicase-2 | protein | length=1197 (NCU04786)	| Neurospora crassa OR74A | Snf2 helicase-2 | protein | length=1197	NCU04786	Neurospora crassa OR74A_rev.fasta	131266	1	2	2	2	0.0001	0.0276
Vince Research01272020	Uncategorized Sample	Vince	GPM22200021135	Cluster of | Neurospora crassa OR74A | AP-2 complex subunit alpha | protein | length=988 (NCU03440)	| Neurospora crassa OR74A | AP-2 complex subunit alpha | protein | length=988	NCU03440	Neurospora crassa OR74A_rev.fasta	110705	1	2	2	2	0.0001	0.0273
Vince Research01272020	Uncategorized Sample	Vince	GPM22200021135	Cluster of | Neurospora crassa OR74A | zinc finger transcription factor-56 | protein | length=747 (NCU07418)	| Neurospora crassa OR74A | zinc finger transcription factor-56 | protein | length=747	NCU07418	Neurospora crassa OR74A_rev.fasta	80835.3	1	2	2	2	0.0001	0.0268
Vince Research01272020	Uncategorized Sample	Vince	GPM22200021135	Cluster of | Neurospora crassa OR74A | serine/threonine protein kinase, serine/threonine protein kinase, variant 1 | protein | length=1151 (NCU00914)	| Neurospora crassa OR74A | serine/threonine protein kinase, serine/threonine protein kinase, variant 1 | protein | length=1151	NCU00914	Neurospora crassa OR74A_rev.fasta	125632	1	2	2	2	0.0001	0.0261
Vince Research01272020	Uncategorized Sample	Vince	GPM22200021135	Cluster of | Neurospora crassa OR74A | AP-1 complex subunit beta-1 | protein | length=749 (NCU09721)	| Neurospora crassa OR74A | AP-1 complex subunit beta-1 | protein | length=749	NCU09721	Neurospora crassa OR74A_rev.fasta	81516.1	1	2	2	2	0.0001	0.0254
Vince Research01272020	Uncategorized Sample	Vince	GPM22200021135	Cluster of | Neurospora crassa OR74A | white collar 1 protein, white collar 1 protein, variant 1, white collar 1 protein, variant 2, white collar 1 protein, variant 3 | protein | length=1167 (NCU02356)	| Neurospora crassa OR74A | white collar 1 protein, white collar 1 protein, variant 1, white collar 1 protein, variant 2, white collar 1 protein, variant 3 | protein | length=1167	NCU02356	Neurospora crassa OR74A_rev.fasta	127453	1	2	2	2	0.0001	0.0249
Vince Research01272020	Uncategorized Sample	Vince	GPM22200021135	Cluster of | Neurospora crassa OR74A | chromodomain helicase, chromodomain helicase, variant 1 | protein | length=1664 (NCU03060)	| Neurospora crassa OR74A | chromodomain helicase, chromodomain helicase, variant 1 | protein | length=1664	NCU03060	Neurospora crassa OR74A_rev.fasta	191740	1	3	3	4	0.0002	0.024
Vince Research01272020	Uncategorized Sample	Vince	GPM22200021135	Cluster of | Neurospora crassa OR74A | Ccr4-Not transcription complex subunit | protein | length=2098 (NCU04766)	| Neurospora crassa OR74A | Ccr4-Not transcription complex subunit | protein | length=2098	NCU04766	Neurospora crassa OR74A_rev.fasta	235431	1	3	4	4	0.0002	0.0238
Vince Research01272020	Uncategorized Sample	Vince	GPM22200021135	Cluster of | Neurospora crassa OR74A | cutinase transcription factor 1 alpha | protein | length=1053 (NCU08000)	| Neurospora crassa OR74A | cutinase transcription factor 1 alpha | protein | length=1053	NCU08000	Neurospora crassa OR74A_rev.fasta	118229	1	2	2	2	0.0001	0.0237
Vince Research01272020	Uncategorized Sample	Vince	GPM22200021135	Cluster of | Neurospora crassa OR74A | hypothetical protein | protein | length=888 (NCU00070)	| Neurospora crassa OR74A | hypothetical protein | protein | length=888	NCU00070	Neurospora crassa OR74A_rev.fasta	95806.2	1	2	2	2	0.0001	0.0236
Vince Research01272020	Uncategorized Sample	Vince	GPM22200021135	Cluster of | Neurospora crassa OR74A | hypothetical protein, hypothetical protein, variant 1 | protein | length=1191 (NCU02315)	| Neurospora crassa OR74A | hypothetical protein, hypothetical protein, variant 1 | protein | length=1191	NCU02315	Neurospora crassa OR74A_rev.fasta	132677	1	2	2	2	0.0001	0.0235
Vince Research01272020	Uncategorized Sample	Vince	GPM22200021135	Cluster of | Neurospora crassa OR74A | fatty acid synthase beta subunit dehydratase, fatty acid synthase beta subunit dehydratase, variant 1 | protein | length=2092 (NCU07307)	| Neurospora crassa OR74A | fatty acid synthase beta subunit dehydratase, fatty acid synthase beta subunit dehydratase, variant 1 | protein | length=2092	NCU07307	Neurospora crassa OR74A_rev.fasta	232457	1	4	4	4	0.0002	0.0234
Vince Research01272020	Uncategorized Sample	Vince	GPM22200021135	Cluster of | Neurospora crassa OR74A | JmjC domain-containing protein | protein | length=1458 (NCU01554)	| Neurospora crassa OR74A | JmjC domain-containing protein | protein | length=1458	NCU01554	Neurospora crassa OR74A_rev.fasta	162991	1	2	2	2	0.0001	0.0226
Vince Research01272020	Uncategorized Sample	Vince	GPM22200021135	Cluster of | Neurospora crassa OR74A | post-transcriptional silencing protein QDE-2, post-transcriptional silencing protein QDE-2, variant 1 | protein | length=1074 (NCU04730)	| Neurospora crassa OR74A | post-transcriptional silencing protein QDE-2, post-transcriptional silencing protein QDE-2, variant 1 | protein | length=1074	NCU04730	Neurospora crassa OR74A_rev.fasta	116727	1	2	2	2	0.0001	0.0223
Vince Research01272020	Uncategorized Sample	Vince	GPM22200021135	Cluster of | Neurospora crassa OR74A | nuclear condensin complex subunit Smc2 | protein | length=1179 (NCU07679)	| Neurospora crassa OR74A | nuclear condensin complex subunit Smc2 | protein | length=1179	NCU07679	Neurospora crassa OR74A_rev.fasta	132765	1	2	2	2	0.0001	0.0221
Vince Research01272020	Uncategorized Sample	Vince	GPM22200021135	Cluster of | Neurospora crassa OR74A | periodic tryptophan protein 2 | protein | length=899 (NCU03794)	| Neurospora crassa OR74A | periodic tryptophan protein 2 | protein | length=899	NCU03794	Neurospora crassa OR74A_rev.fasta	99705.8	1	2	2	2	0.0001	0.0211
Vince Research01272020	Uncategorized Sample	Vince	GPM22200021135	Cluster of | Neurospora crassa OR74A | RNA binding effector protein Scp160, RNA binding effector protein Scp160, variant 1 | protein | length=1283 (NCU03897)	| Neurospora crassa OR74A | RNA binding effector protein Scp160, RNA binding effector protein Scp160, variant 1 | protein | length=1283	NCU03897	Neurospora crassa OR74A_rev.fasta	140358	1	2	2	2	0.0001	0.021
Vince Research01272020	Uncategorized Sample	Vince	GPM22200021135	Cluster of | Neurospora crassa OR74A | hypothetical protein | protein | length=962 (NCU06950)	| Neurospora crassa OR74A | hypothetical protein | protein | length=962	NCU06950	Neurospora crassa OR74A_rev.fasta	108429	1	2	2	2	0.0001	0.0208
Vince Research01272020	Uncategorized Sample	Vince	GPM22200021135	Cluster of | Neurospora crassa OR74A | DNA mismatch repair protein msh-2 | protein | length=937 (NCU02230)	| Neurospora crassa OR74A | DNA mismatch repair protein msh-2 | protein | length=937	NCU02230	Neurospora crassa OR74A_rev.fasta	105072	1	2	2	2	0.0001	0.0203
Vince Research01272020	Uncategorized Sample	Vince	GPM22200021135	Cluster of | Neurospora crassa OR74A | transcription initiation factor-4 | protein | length=1870 (NCU02052)	| Neurospora crassa OR74A | transcription initiation factor-4 | protein | length=1870	NCU02052	Neurospora crassa OR74A_rev.fasta	212527	1	2	2	2	0.0001	0.0187
Vince Research01272020	Uncategorized Sample	Vince	GPM22200021135	Cluster of | Neurospora crassa OR74A | pre-mRNA-processing ATP-dependent RNA helicase prp-5 | protein | length=1194 (NCU02696)	| Neurospora crassa OR74A | pre-mRNA-processing ATP-dependent RNA helicase prp-5 | protein | length=1194	NCU02696	Neurospora crassa OR74A_rev.fasta	131307	1	2	2	2	0.0001	0.0176
Vince Research01272020	Uncategorized Sample	Vince	GPM22200021135	Cluster of | Neurospora crassa OR74A | nuclear division-75 | protein | length=2185 (NCU00205)	| Neurospora crassa OR74A | nuclear division-75 | protein | length=2185	NCU00205	Neurospora crassa OR74A_rev.fasta	240240	1	3	3	3	0.0001	0.0174
Vince Research01272020	Uncategorized Sample	Vince	GPM22200021135	Cluster of | Neurospora crassa OR74A | chromodomain-helicase-DNA-binding protein 4 | protein | length=1726 (NCU10337)	| Neurospora crassa OR74A | chromodomain-helicase-DNA-binding protein 4 | protein | length=1726	NCU10337	Neurospora crassa OR74A_rev.fasta	194832	1	1	1	2	0.0001	0.0162
Vince Research01272020	Uncategorized Sample	Vince	GPM22200021135	Cluster of | Neurospora crassa OR74A | activating signal cointegrator 1 complex subunit 3 | protein | length=2066 (NCU08267)	| Neurospora crassa OR74A | activating signal cointegrator 1 complex subunit 3 | protein | length=2066	NCU08267	Neurospora crassa OR74A_rev.fasta	231702	1	2	2	2	0.0001	0.014
Vince Research01272020	Uncategorized Sample	Vince	GPM22200021135	Cluster of | Neurospora crassa OR74A | pre-mRNA processing splicing factor 8 | protein | length=2374 (NCU07832)	| Neurospora crassa OR74A | pre-mRNA processing splicing factor 8 | protein | length=2374	NCU07832	Neurospora crassa OR74A_rev.fasta	274874	1	2	2	2	0.0001	0.0131
Vince Research01272020	Uncategorized Sample	Vince	GPM22200021135	Cluster of | Neurospora crassa OR74A | AMI1 protein | protein | length=1988 (NCU01953)	| Neurospora crassa OR74A | AMI1 protein | protein | length=1988	NCU01953	Neurospora crassa OR74A_rev.fasta	216912	1	2	2	2	0.0001	0.0126
Vince Research01272020	Uncategorized Sample	Vince	GPM22200021135	Cluster of | Neurospora crassa OR74A | hypothetical protein | protein | length=2626 (NCU02494)	| Neurospora crassa OR74A | hypothetical protein | protein | length=2626	NCU02494	Neurospora crassa OR74A_rev.fasta	295391	1	3	3	3	0.0001	0.0122
Vince Research01272020	Uncategorized Sample	Vince	GPM22200021135	Cluster of | Neurospora crassa OR74A | histone acetylase complex subunit Paf400 | protein | length=3895 (NCU01379)	| Neurospora crassa OR74A | histone acetylase complex subunit Paf400 | protein | length=3895	NCU01379	Neurospora crassa OR74A_rev.fasta	443294	1	3	3	3	0.0001	0.0113
Vince Research01272020	Uncategorized Sample	Vince	GPM22200021135	Cluster of | Neurospora crassa OR74A | pre-mRNA splicing helicase | protein | length=2209 (NCU02685)	| Neurospora crassa OR74A | pre-mRNA splicing helicase | protein | length=2209	NCU02685	Neurospora crassa OR74A_rev.fasta	250228	1	2	2	2	0.0001	0.0113
Vince Research01272020	Uncategorized Sample	Vince	GPM22200021135	Cluster of | Neurospora crassa OR74A | two-component sensor protein histidine protein kinase | protein | length=2557 (NCU01823)	| Neurospora crassa OR74A | two-component sensor protein histidine protein kinase | protein | length=2557	NCU01823	Neurospora crassa OR74A_rev.fasta	282118	1	2	2	2	0.0001	0.011
Vince Research01272020	Uncategorized Sample	Vince	GPM22200021135	Cluster of | Neurospora crassa OR74A | phosphatidylinositol 3-kinase tor2 | protein | length=2443 (NCU05608)	| Neurospora crassa OR74A | phosphatidylinositol 3-kinase tor2 | protein | length=2443	NCU05608	Neurospora crassa OR74A_rev.fasta	278019	1	2	2	2	0.0001	0.0098
Vince Research01272020	Uncategorized Sample	Vince	GPM22200021135	Cluster of | Neurospora crassa OR74A | Leashin Woronin body tether | protein | length=10709 (NCU02793)	| Neurospora crassa OR74A | Leashin Woronin body tether | protein | length=10709	NCU02793	Neurospora crassa OR74A_rev.fasta	1.16679e+06	1	2	2	2	0.0001	0.0021
END OF FILE

## Sheet: CRF4-2_Protein Report
Experiment name	Biological sample category	Biological sample name	MS/MS sample name	Cluster	Protein name	Protein accession numbers	Database sources	Protein molecular weight (Da)	Protein identification probability	Exclusive unique peptide count	Exclusive unique spectrum count	Total spectrum count	Percentage of total spectra	Percentage sequence coverage
mcn10112019 (2)	Uncategorized Sample	7971	GPM22200020612	Cluster of | Neurospora crassa OR74A | Telomere binding protein | protein | length=1092 (NCU00164)	| Neurospora crassa OR74A | Telomere binding protein | protein | length=1092	NCU00164	Neurospora crassa OR74A_rev.fasta	123513	1	132	292	696	0.0303	0.725
mcn10112019 (2)	Uncategorized Sample	7971	GPM22200020612	Cluster of | Neurospora crassa OR74A | chromatin remodelling complex ATPase chain ISW1 | protein | length=1126 (NCU03875)	| Neurospora crassa OR74A | chromatin remodelling complex ATPase chain ISW1 | protein | length=1126	NCU03875	Neurospora crassa OR74A_rev.fasta	128534	1	138	325	607	0.0264	0.663
mcn10112019 (2)	Uncategorized Sample	7971	GPM22200020612	Cluster of | Neurospora crassa OR74A | SOM1 protein, SOM1 protein, variant 1, SOM1 protein, variant 2, SOM1 protein, variant 3 | protein | length=794 (NCU05791)	| Neurospora crassa OR74A | SOM1 protein, SOM1 protein, variant 1, SOM1 protein, variant 2, SOM1 protein, variant 3 | protein | length=794	NCU05791	Neurospora crassa OR74A_rev.fasta	85741	1	53	181	529	0.023	0.511
mcn10112019 (2)	Uncategorized Sample	7971	GPM22200020612	Cluster of Keratin, type II cytoskeletal 1 OS=Homo sapiens GN=KRT1 PE=1 SV=6 (sp|P04264|K2C1_HUMAN)	Keratin, type II cytoskeletal 1 OS=Homo sapiens GN=KRT1 PE=1 SV=6	sp|P04264|K2C1_HUMAN	Neurospora crassa OR74A_rev.fasta	65888	1	82	151	254	0.0111	0.719
mcn10112019 (2)	Uncategorized Sample	7971	GPM22200020612	Cluster of | Neurospora crassa OR74A | hypothetical protein | protein | length=397 (NCU03073)	| Neurospora crassa OR74A | hypothetical protein | protein | length=397	NCU03073	Neurospora crassa OR74A_rev.fasta	41325.2	1	69	127	238	0.0104	0.657
mcn10112019 (2)	Uncategorized Sample	7971	GPM22200020612	Cluster of | Neurospora crassa OR74A | heat shock protein 70 | protein | length=646 (NCU09602)	| Neurospora crassa OR74A | heat shock protein 70 | protein | length=646	NCU09602	Neurospora crassa OR74A_rev.fasta	70555.4	1	57	126	182	0.0079	0.732
mcn10112019 (2)	Uncategorized Sample	7971	GPM22200020612	Cluster of Keratin, type I cytoskeletal 10 OS=Homo sapiens GN=KRT10 PE=1 SV=6 (sp|P13645|K1C10_HUMAN)	Keratin, type I cytoskeletal 10 OS=Homo sapiens GN=KRT10 PE=1 SV=6	sp|P13645|K1C10_HUMAN	Neurospora crassa OR74A_rev.fasta	59520.3	1	44	85	178	0.0078	0.56
mcn10112019 (2)	Uncategorized Sample	7971	GPM22200020612	Cluster of Keratin, type I cytoskeletal 9 OS=Homo sapiens GN=KRT9 PE=1 SV=3 (sp|P35527|K1C9_HUMAN)	Keratin, type I cytoskeletal 9 OS=Homo sapiens GN=KRT9 PE=1 SV=3	sp|P35527|K1C9_HUMAN	Neurospora crassa OR74A_rev.fasta	62131	1	60	106	176	0.0077	0.596
mcn10112019 (2)	Uncategorized Sample	7971	GPM22200020612	Cluster of Immunoglobulin G-binding protein A OS=Staphylococcus aureus (strain NCTC 8325) GN=spa PE=1 SV=3 (sp|P02976|SPA_STAA8)	Immunoglobulin G-binding protein A OS=Staphylococcus aureus (strain NCTC 8325) GN=spa PE=1 SV=3	sp|P02976|SPA_STAA8	Neurospora crassa OR74A_rev.fasta	56439.4	1	0	0	173	0.0075	0.543
mcn10112019 (2)	Uncategorized Sample	7971	GPM22200020612	Cluster of | Neurospora crassa OR74A | PTAB | protein | length=794 (NCU01543)	| Neurospora crassa OR74A | PTAB | protein | length=794	NCU01543	Neurospora crassa OR74A_rev.fasta	86690.7	1	25	62	160	0.007	0.264
mcn10112019 (2)	Uncategorized Sample	7971	GPM22200020612	Cluster of Keratin, type II cytoskeletal 2 epidermal OS=Homo sapiens GN=KRT2 PE=1 SV=2 (sp|P35908|K22E_HUMAN)	Keratin, type II cytoskeletal 2 epidermal OS=Homo sapiens GN=KRT2 PE=1 SV=2	sp|P35908|K22E_HUMAN	Neurospora crassa OR74A_rev.fasta	65866.4	1	60	103	157	0.0068	0.758
mcn10112019 (2)	Uncategorized Sample	7971	GPM22200020612	Cluster of Immunoglobulin G-binding protein A OS=Staphylococcus aureus (strain NCTC 8325) GN=spa PE=1 SV=3 (sp|P02976|SPA_STAA8)	Immunoglobulin G-binding protein A OS=Staphylococcus aureus (strain N315) GN=spa PE=1 SV=1	sp|P99134|SPA_STAAN	Neurospora crassa OR74A_rev.fasta	48874.7	0.992	0	0	155	0.0068	0.538
mcn10112019 (2)	Uncategorized Sample	7971	GPM22200020612	Cluster of Trypsin OS=Sus scrofa PE=1 SV=1 (sp|P00761|TRYP_PIG)	Trypsin OS=Sus scrofa PE=1 SV=1	sp|P00761|TRYP_PIG	Neurospora crassa OR74A_rev.fasta	24409.3	1	31	50	155	0.0068	0.338
mcn10112019 (2)	Uncategorized Sample	7971	GPM22200020612	Cluster of | Neurospora crassa OR74A | Hsp70-like protein | protein | length=668 (NCU08693)	| Neurospora crassa OR74A | Hsp70-like protein | protein | length=668	NCU08693	Neurospora crassa OR74A_rev.fasta	72732.8	1	48	99	149	0.0065	0.633
mcn10112019 (2)	Uncategorized Sample	7971	GPM22200020612	Cluster of Immunoglobulin G-binding protein A OS=Staphylococcus aureus (strain NCTC 8325) GN=spa PE=1 SV=3 (sp|P02976|SPA_STAA8)	Immunoglobulin G-binding protein A OS=Staphylococcus aureus GN=spa PE=1 SV=1	sp|P38507|SPA_STAAU	Neurospora crassa OR74A_rev.fasta	55441.4	1	0	0	134	0.0058	0.467
mcn10112019 (2)	Uncategorized Sample	7971	GPM22200020612	Cluster of | Neurospora crassa OR74A | hypothetical protein | protein | length=1072 (NCU03964)	| Neurospora crassa OR74A | hypothetical protein | protein | length=1072	NCU03964	Neurospora crassa OR74A_rev.fasta	119476	1	48	88	133	0.0058	0.525
mcn10112019 (2)	Uncategorized Sample	7971	GPM22200020612	Cluster of | Neurospora crassa OR74A | hypothetical protein | protein | length=304 (NCU06623)	| Neurospora crassa OR74A | hypothetical protein | protein | length=304	NCU06623	Neurospora crassa OR74A_rev.fasta	31090.8	1	19	40	119	0.0052	0.47
mcn10112019 (2)	Uncategorized Sample	7971	GPM22200020612	Cluster of | Neurospora crassa OR74A | glucose-regulated protein | protein | length=661 (NCU03982)	| Neurospora crassa OR74A | glucose-regulated protein | protein | length=661	NCU03982	Neurospora crassa OR74A_rev.fasta	72333.2	1	39	69	89	0.0039	0.599
mcn10112019 (2)	Uncategorized Sample	7971	GPM22200020612	Cluster of | Neurospora crassa OR74A | WD domain-containing protein | protein | length=606 (NCU04101)	| Neurospora crassa OR74A | WD domain-containing protein | protein | length=606	NCU04101	Neurospora crassa OR74A_rev.fasta	67475.3	1	39	65	87	0.0038	0.566
mcn10112019 (2)	Uncategorized Sample	7971	GPM22200020612	Cluster of | Neurospora crassa OR74A | hypothetical protein | protein | length=324 (NCU02695)	| Neurospora crassa OR74A | hypothetical protein | protein | length=324	NCU02695	Neurospora crassa OR74A_rev.fasta	35514	1	32	60	79	0.0034	0.503
mcn10112019 (2)	Uncategorized Sample	7971	GPM22200020612	Cluster of | Neurospora crassa OR74A | TBP associated factor, TBP associated factor, variant 1 | protein | length=1893 (NCU07556)	| Neurospora crassa OR74A | TBP associated factor, TBP associated factor, variant 1 | protein | length=1893	NCU07556	Neurospora crassa OR74A_rev.fasta	210360	1	55	74	79	0.0034	0.35
mcn10112019 (2)	Uncategorized Sample	7971	GPM22200020612	Cluster of | Neurospora crassa OR74A | hypothetical protein | protein | length=1618 (NCU04073)	| Neurospora crassa OR74A | hypothetical protein | protein | length=1618	NCU04073	Neurospora crassa OR74A_rev.fasta	171137	1	48	71	78	0.0034	0.404
mcn10112019 (2)	Uncategorized Sample	7971	GPM22200020612	Cluster of | Neurospora crassa OR74A | hypothetical protein, hypothetical protein, variant 1 | protein | length=1530 (NCU00124)	| Neurospora crassa OR74A | hypothetical protein, hypothetical protein, variant 1 | protein | length=1530	NCU00124	Neurospora crassa OR74A_rev.fasta	166943	1	36	62	74	0.0032	0.344
mcn10112019 (2)	Uncategorized Sample	7971	GPM22200020612	Cluster of | Neurospora crassa OR74A | beta-taxilin, beta-taxilin, variant 1 | protein | length=384 (NCU01273)	| Neurospora crassa OR74A | beta-taxilin, beta-taxilin, variant 1 | protein | length=384	NCU01273	Neurospora crassa OR74A_rev.fasta	45361.4	1	23	51	70	0.0031	0.315
mcn10112019 (2)	Uncategorized Sample	7971	GPM22200020612	Cluster of | Neurospora crassa OR74A | translation-2 | protein | length=607 (NCU03061)	| Neurospora crassa OR74A | translation-2 | protein | length=607	NCU03061	Neurospora crassa OR74A_rev.fasta	68495.3	1	27	50	64	0.0028	0.478
mcn10112019 (2)	Uncategorized Sample	7971	GPM22200020612	Cluster of | Neurospora crassa OR74A | hypothetical protein | protein | length=1274 (NCU09112)	| Neurospora crassa OR74A | hypothetical protein | protein | length=1274	NCU09112	Neurospora crassa OR74A_rev.fasta	142414	1	38	60	64	0.0028	0.432
mcn10112019 (2)	Uncategorized Sample	7971	GPM22200020612	Cluster of | Neurospora crassa OR74A | heat shock protein 70 | protein | length=585 (NCU02075)	| Neurospora crassa OR74A | heat shock protein 70 | protein | length=585	NCU02075	Neurospora crassa OR74A_rev.fasta	63510.3	1	32	51	61	0.0027	0.506
mcn10112019 (2)	Uncategorized Sample	7971	GPM22200020612	Cluster of | Neurospora crassa OR74A | hypothetical protein, hypothetical protein, variant 1, hypothetical protein, variant 2 | protein | length=443 (NCU02316)	| Neurospora crassa OR74A | hypothetical protein, hypothetical protein, variant 1, hypothetical protein, variant 2 | protein | length=443	NCU02316	Neurospora crassa OR74A_rev.fasta	47554.7	1	22	42	56	0.0024	0.551
mcn10112019 (2)	Uncategorized Sample	7971	GPM22200020612	Cluster of | Neurospora crassa OR74A | elongation factor 1 alpha | protein | length=460 (NCU02003)	| Neurospora crassa OR74A | elongation factor 1 alpha | protein | length=460	NCU02003	Neurospora crassa OR74A_rev.fasta	49672.9	1	19	33	51	0.0022	0.45
mcn10112019 (2)	Uncategorized Sample	7971	GPM22200020612	Cluster of | Neurospora crassa OR74A | hypothetical protein | protein | length=964 (NCU07282)	| Neurospora crassa OR74A | hypothetical protein | protein | length=964	NCU07282	Neurospora crassa OR74A_rev.fasta	100181	1	18	41	51	0.0022	0.329
mcn10112019 (2)	Uncategorized Sample	7971	GPM22200020612	Cluster of | Neurospora crassa OR74A | Glycogen debranching enzyme | protein | length=1566 (NCU00743)	| Neurospora crassa OR74A | Glycogen debranching enzyme | protein | length=1566	NCU00743	Neurospora crassa OR74A_rev.fasta	176294	1	39	48	51	0.0022	0.284
mcn10112019 (2)	Uncategorized Sample	7971	GPM22200020612	Cluster of | Neurospora crassa OR74A | glycogen synthase, glycogen synthase, variant 1, glycogen synthase, variant 2, glycogen synthase, variant 3 | protein | length=706 (NCU06687)	| Neurospora crassa OR74A | glycogen synthase, glycogen synthase, variant 1, glycogen synthase, variant 2, glycogen synthase, variant 3 | protein | length=706	NCU06687	Neurospora crassa OR74A_rev.fasta	80907.9	1	22	38	47	0.0021	0.37
mcn10112019 (2)	Uncategorized Sample	7971	GPM22200020612	Cluster of | Neurospora crassa OR74A | Histone H4 | protein | length=103 (NCU00212)	| Neurospora crassa OR74A | Histone H4 | protein | length=103	NCU00212,NCU01634	Neurospora crassa OR74A_rev.fasta	11370.9	1	15	25	46	0.002	0.573
mcn10112019 (2)	Uncategorized Sample	7971	GPM22200020612	Cluster of | Neurospora crassa OR74A | transcription initiation factor-4 | protein | length=1870 (NCU02052)	| Neurospora crassa OR74A | transcription initiation factor-4 | protein | length=1870	NCU02052	Neurospora crassa OR74A_rev.fasta	212527	1	38	42	43	0.0019	0.252
mcn10112019 (2)	Uncategorized Sample	7971	GPM22200020612	Cluster of | Neurospora crassa OR74A | mRNA binding post-transcriptional regulator | protein | length=391 (NCU00768)	| Neurospora crassa OR74A | mRNA binding post-transcriptional regulator | protein | length=391	NCU00768	Neurospora crassa OR74A_rev.fasta	42177	1	13	29	42	0.0018	0.407
mcn10112019 (2)	Uncategorized Sample	7971	GPM22200020612	Cluster of | Neurospora crassa OR74A | cytokinesis protein sepA | protein | length=1817 (NCU01431)	| Neurospora crassa OR74A | cytokinesis protein sepA | protein | length=1817	NCU01431	Neurospora crassa OR74A_rev.fasta	200823	1	34	41	41	0.0018	0.217
mcn10112019 (2)	Uncategorized Sample	7971	GPM22200020612	Cluster of | Neurospora crassa OR74A | Ccr4-Not transcription complex subunit | protein | length=2098 (NCU04766)	| Neurospora crassa OR74A | Ccr4-Not transcription complex subunit | protein | length=2098	NCU04766	Neurospora crassa OR74A_rev.fasta	235431	1	34	41	41	0.0018	0.21
mcn10112019 (2)	Uncategorized Sample	7971	GPM22200020612	Cluster of | Neurospora crassa OR74A | hypothetical protein | protein | length=893 (NCU03480)	| Neurospora crassa OR74A | hypothetical protein | protein | length=893	NCU03480	Neurospora crassa OR74A_rev.fasta	95705.4	1	26	37	39	0.0017	0.333
mcn10112019 (2)	Uncategorized Sample	7971	GPM22200020612	Cluster of | Neurospora crassa OR74A | tubulin beta chain | protein | length=447 (NCU04054)	| Neurospora crassa OR74A | tubulin beta chain | protein | length=447	NCU04054	Neurospora crassa OR74A_rev.fasta	49867.5	1	14	26	38	0.0017	0.356
mcn10112019 (2)	Uncategorized Sample	7971	GPM22200020612	Cluster of | Neurospora crassa OR74A | cytoplasmic ribosomal protein 10 | protein | length=262 (NCU00489)	| Neurospora crassa OR74A | cytoplasmic ribosomal protein 10 | protein | length=262	NCU00489	Neurospora crassa OR74A_rev.fasta	28666.6	1	19	32	37	0.0016	0.718
mcn10112019 (2)	Uncategorized Sample	7971	GPM22200020612	Cluster of | Neurospora crassa OR74A | hypothetical protein, hypothetical protein, variant 1 | protein | length=414 (NCU00541)	| Neurospora crassa OR74A | hypothetical protein, hypothetical protein, variant 1 | protein | length=414	NCU00541	Neurospora crassa OR74A_rev.fasta	43535.1	1	19	29	37	0.0016	0.56
mcn10112019 (2)	Uncategorized Sample	7971	GPM22200020612	Cluster of | Neurospora crassa OR74A | hypothetical protein | protein | length=679 (NCU00628)	| Neurospora crassa OR74A | hypothetical protein | protein | length=679	NCU00628	Neurospora crassa OR74A_rev.fasta	75067.4	1	26	37	37	0.0016	0.513
mcn10112019 (2)	Uncategorized Sample	7971	GPM22200020612	Cluster of | Neurospora crassa OR74A | glyceraldehyde 3-phosphate-dehydrogenase | protein | length=338 (NCU01528)	| Neurospora crassa OR74A | glyceraldehyde 3-phosphate-dehydrogenase | protein | length=338	NCU01528	Neurospora crassa OR74A_rev.fasta	36292.6	1	18	28	37	0.0016	0.47
mcn10112019 (2)	Uncategorized Sample	7971	GPM22200020612	Cluster of | Neurospora crassa OR74A | porin-binding domain protein-3 | protein | length=690 (NCU08003)	| Neurospora crassa OR74A | porin-binding domain protein-3 | protein | length=690	NCU08003	Neurospora crassa OR74A_rev.fasta	74867.9	1	25	36	37	0.0016	0.412
mcn10112019 (2)	Uncategorized Sample	7971	GPM22200020612	Cluster of | Neurospora crassa OR74A | hypothetical protein | protein | length=1148 (NCU03058)	| Neurospora crassa OR74A | hypothetical protein | protein | length=1148	NCU03058	Neurospora crassa OR74A_rev.fasta	124552	1	27	34	37	0.0016	0.295
mcn10112019 (2)	Uncategorized Sample	7971	GPM22200020612	Cluster of | Neurospora crassa OR74A | translation elongation factor aEF-2 | protein | length=844 (NCU07700)	| Neurospora crassa OR74A | translation elongation factor aEF-2 | protein | length=844	NCU07700	Neurospora crassa OR74A_rev.fasta	93264	1	25	35	36	0.0016	0.335
mcn10112019 (2)	Uncategorized Sample	7971	GPM22200020612	Cluster of | Neurospora crassa OR74A | actin, actin, variant 1 | protein | length=375 (NCU04173)	| Neurospora crassa OR74A | actin, actin, variant 1 | protein | length=375	NCU04173	Neurospora crassa OR74A_rev.fasta	41608.1	1	17	30	35	0.0015	0.499
mcn10112019 (2)	Uncategorized Sample	7971	GPM22200020612	Cluster of | Neurospora crassa OR74A | hypothetical protein | protein | length=385 (NCU06081)	| Neurospora crassa OR74A | hypothetical protein | protein | length=385	NCU06081	Neurospora crassa OR74A_rev.fasta	42562.5	1	18	30	35	0.0015	0.436
mcn10112019 (2)	Uncategorized Sample	7971	GPM22200020612	Cluster of | Neurospora crassa OR74A | NIMA-interacting protein TinC | protein | length=795 (NCU03125)	| Neurospora crassa OR74A | NIMA-interacting protein TinC | protein | length=795	NCU03125	Neurospora crassa OR74A_rev.fasta	89582.7	1	29	34	35	0.0015	0.419
mcn10112019 (2)	Uncategorized Sample	7971	GPM22200020612	Cluster of | Neurospora crassa OR74A | Histone H2B | protein | length=137 (NCU02435)	| Neurospora crassa OR74A | Histone H2B | protein | length=137	NCU02435	Neurospora crassa OR74A_rev.fasta	14841.8	1	9	15	35	0.0015	0.387
mcn10112019 (2)	Uncategorized Sample	7971	GPM22200020612	Cluster of | Neurospora crassa OR74A | SNF2-family ATP dependent chromatin remodeling factor snf21 | protein | length=1482 (NCU06488)	| Neurospora crassa OR74A | SNF2-family ATP dependent chromatin remodeling factor snf21 | protein | length=1482	NCU06488	Neurospora crassa OR74A_rev.fasta	168236	1	27	33	35	0.0015	0.207
mcn10112019 (2)	Uncategorized Sample	7971	GPM22200020612	Cluster of | Neurospora crassa OR74A | DUF52 domain-containing protein | protein | length=355 (NCU02459)	| Neurospora crassa OR74A | DUF52 domain-containing protein | protein | length=355	NCU02459	Neurospora crassa OR74A_rev.fasta	39202.3	1	18	27	31	0.0014	0.521
mcn10112019 (2)	Uncategorized Sample	7971	GPM22200020612	Cluster of | Neurospora crassa OR74A | 60S ribosomal protein L3 | protein | length=392 (NCU06843)	| Neurospora crassa OR74A | 60S ribosomal protein L3 | protein | length=392	NCU06843	Neurospora crassa OR74A_rev.fasta	44035.4	1	18	29	31	0.0014	0.426
mcn10112019 (2)	Uncategorized Sample	7971	GPM22200020612	Cluster of | Neurospora crassa OR74A | RNA binding protein, RNA binding protein, variant 1 | protein | length=613 (NCU06684)	| Neurospora crassa OR74A | RNA binding protein, RNA binding protein, variant 1 | protein | length=613	NCU06684	Neurospora crassa OR74A_rev.fasta	65561.7	1	15	23	31	0.0014	0.246
mcn10112019 (2)	Uncategorized Sample	7971	GPM22200020612	Cluster of | Neurospora crassa OR74A | Histone H2A | protein | length=134 (NCU02437)	| Neurospora crassa OR74A | Histone H2A | protein | length=134	NCU02437	Neurospora crassa OR74A_rev.fasta	14154.9	1	11	14	30	0.0013	0.44
mcn10112019 (2)	Uncategorized Sample	7971	GPM22200020612	Cluster of | Neurospora crassa OR74A | RNA polymerase-32 | protein | length=1154 (NCU00998)	| Neurospora crassa OR74A | RNA polymerase-32 | protein | length=1154	NCU00998	Neurospora crassa OR74A_rev.fasta	123869	1	19	28	30	0.0013	0.183
mcn10112019 (2)	Uncategorized Sample	7971	GPM22200020612	Cluster of | Neurospora crassa OR74A | 40S ribosomal protein S1 | protein | length=256 (NCU01452)	| Neurospora crassa OR74A | 40S ribosomal protein S1 | protein | length=256	NCU01452	Neurospora crassa OR74A_rev.fasta	29070	1	18	23	29	0.0013	0.605
mcn10112019 (2)	Uncategorized Sample	7971	GPM22200020612	Cluster of | Neurospora crassa OR74A | DNA repair-12 | protein | length=950 (NCU07975)	| Neurospora crassa OR74A | DNA repair-12 | protein | length=950	NCU07975	Neurospora crassa OR74A_rev.fasta	106420	1	22	29	29	0.0013	0.262
mcn10112019 (2)	Uncategorized Sample	7971	GPM22200020612	Cluster of | Neurospora crassa OR74A | transcription initiation factor-7 | protein | length=801 (NCU04136)	| Neurospora crassa OR74A | transcription initiation factor-7 | protein | length=801	NCU04136	Neurospora crassa OR74A_rev.fasta	86130.1	1	20	27	29	0.0013	0.256
mcn10112019 (2)	Uncategorized Sample	7971	GPM22200020612	Cluster of | Neurospora crassa OR74A | replication factor-A protein 1 | protein | length=610 (NCU03606)	| Neurospora crassa OR74A | replication factor-A protein 1 | protein | length=610	NCU03606	Neurospora crassa OR74A_rev.fasta	68626	1	22	26	28	0.0012	0.452
mcn10112019 (2)	Uncategorized Sample	7971	GPM22200020612	Cluster of | Neurospora crassa OR74A | Adenosylhomocysteinase, adenosylhomocysteinase, variant 1 | protein | length=449 (NCU07930)	| Neurospora crassa OR74A | Adenosylhomocysteinase, adenosylhomocysteinase, variant 1 | protein | length=449	NCU07930	Neurospora crassa OR74A_rev.fasta	49080.9	1	16	28	28	0.0012	0.374
mcn10112019 (2)	Uncategorized Sample	7971	GPM22200020612	Cluster of | Neurospora crassa OR74A | transcription initiation factor-6 | protein | length=465 (NCU07757)	| Neurospora crassa OR74A | transcription initiation factor-6 | protein | length=465	NCU07757	Neurospora crassa OR74A_rev.fasta	51014	1	19	25	27	0.0012	0.495
mcn10112019 (2)	Uncategorized Sample	7971	GPM22200020612	Cluster of | Neurospora crassa OR74A | nuclear and cytoplasmic polyadenylated RNA-binding protein pub1 | protein | length=480 (NCU07874)	| Neurospora crassa OR74A | nuclear and cytoplasmic polyadenylated RNA-binding protein pub1 | protein | length=480	NCU07874	Neurospora crassa OR74A_rev.fasta	52235.9	1	11	20	27	0.0012	0.31
mcn10112019 (2)	Uncategorized Sample	7971	GPM22200020612	Cluster of | Neurospora crassa OR74A | hypothetical protein | protein | length=760 (NCU04325)	| Neurospora crassa OR74A | hypothetical protein | protein | length=760	NCU04325	Neurospora crassa OR74A_rev.fasta	83391.4	1	21	26	27	0.0012	0.293
mcn10112019 (2)	Uncategorized Sample	7971	GPM22200020612	Cluster of | Neurospora crassa OR74A | 60S ribosomal protein L4-A | protein | length=361 (NCU03757)	| Neurospora crassa OR74A | 60S ribosomal protein L4-A | protein | length=361	NCU03757	Neurospora crassa OR74A_rev.fasta	38814.2	1	18	25	26	0.0011	0.535
mcn10112019 (2)	Uncategorized Sample	7971	GPM22200020612	Cluster of | Neurospora crassa OR74A | polyadenylate-binding protein | protein | length=764 (NCU04799)	| Neurospora crassa OR74A | polyadenylate-binding protein | protein | length=764	NCU04799	Neurospora crassa OR74A_rev.fasta	82318	1	24	26	26	0.0011	0.406
mcn10112019 (2)	Uncategorized Sample	7971	GPM22200020612	Cluster of | Neurospora crassa OR74A | hypothetical protein | protein | length=314 (NCU03126)	| Neurospora crassa OR74A | hypothetical protein | protein | length=314	NCU03126	Neurospora crassa OR74A_rev.fasta	35384.8	1	12	22	26	0.0011	0.395
mcn10112019 (2)	Uncategorized Sample	7971	GPM22200020612	Cluster of | Neurospora crassa OR74A | centromere/microtubule-binding protein cbf5 | protein | length=480 (NCU01290)	| Neurospora crassa OR74A | centromere/microtubule-binding protein cbf5 | protein | length=480	NCU01290	Neurospora crassa OR74A_rev.fasta	52880.3	1	15	23	26	0.0011	0.342
mcn10112019 (2)	Uncategorized Sample	7971	GPM22200020612	Cluster of | Neurospora crassa OR74A | thiazole biosynthetic enzyme, thiazole biosynthetic enzyme, variant 1, thiazole biosynthetic enzyme, variant 2, thiazole biosynthetic enzyme, variant 3 | protein | length=344 (NCU06110)	| Neurospora crassa OR74A | thiazole biosynthetic enzyme, thiazole biosynthetic enzyme, variant 1, thiazole biosynthetic enzyme, variant 2, thiazole biosynthetic enzyme, variant 3 | protein | length=344	NCU06110	Neurospora crassa OR74A_rev.fasta	36863.8	1	13	23	25	0.0011	0.369
mcn10112019 (2)	Uncategorized Sample	7971	GPM22200020612	Cluster of | Neurospora crassa OR74A | hypothetical protein | protein | length=1050 (NCU05943)	| Neurospora crassa OR74A | hypothetical protein | protein | length=1050	NCU05943	Neurospora crassa OR74A_rev.fasta	117061	1	19	25	25	0.0011	0.198
mcn10112019 (2)	Uncategorized Sample	7971	GPM22200020612	Cluster of | Neurospora crassa OR74A | actin | protein | length=469 (NCU02555)	| Neurospora crassa OR74A | actin | protein | length=469	NCU02555	Neurospora crassa OR74A_rev.fasta	51985.4	1	17	22	24	0.001	0.38
mcn10112019 (2)	Uncategorized Sample	7971	GPM22200020612	Cluster of Keratin, type I cytoskeletal 15 OS=Ovis aries GN=KRT15 PE=2 SV=1 (sp|O77727|K1C15_SHEEP)	Keratin, type I cytoskeletal 15 OS=Ovis aries GN=KRT15 PE=2 SV=1	sp|O77727|K1C15_SHEEP	Neurospora crassa OR74A_rev.fasta	48771.9	1	2	2	24	0.001	0.0905
mcn10112019 (2)	Uncategorized Sample	7971	GPM22200020612	Cluster of | Neurospora crassa OR74A | hypothetical protein | protein | length=419 (NCU06592)	| Neurospora crassa OR74A | hypothetical protein | protein | length=419	NCU06592	Neurospora crassa OR74A_rev.fasta	45879.2	1	16	20	23	0.001	0.525
mcn10112019 (2)	Uncategorized Sample	7971	GPM22200020612	Cluster of | Neurospora crassa OR74A | 40S ribosomal protein S18 | protein | length=156 (NCU00475)	| Neurospora crassa OR74A | 40S ribosomal protein S18 | protein | length=156	NCU00475	Neurospora crassa OR74A_rev.fasta	17769	1	12	20	23	0.001	0.494
mcn10112019 (2)	Uncategorized Sample	7971	GPM22200020612	Cluster of | Neurospora crassa OR74A | alpha-tubulin | protein | length=449 (NCU09468)	| Neurospora crassa OR74A | alpha-tubulin | protein | length=449	NCU09468	Neurospora crassa OR74A_rev.fasta	49966.1	1	14	18	23	0.001	0.383
mcn10112019 (2)	Uncategorized Sample	7971	GPM22200020612	Cluster of | Neurospora crassa OR74A | protein-beta-aspartate methyltransferase | protein | length=395 (NCU05078)	| Neurospora crassa OR74A | protein-beta-aspartate methyltransferase | protein | length=395	NCU05078	Neurospora crassa OR74A_rev.fasta	42636.6	1	9	19	23	0.001	0.304
mcn10112019 (2)	Uncategorized Sample	7971	GPM22200020612	Cluster of | Neurospora crassa OR74A | lectin 2b | protein | length=144 (NCU05651)	| Neurospora crassa OR74A | lectin 2b | protein | length=144	NCU05651	Neurospora crassa OR74A_rev.fasta	16330.4	1	10	19	22	0.001	0.771
mcn10112019 (2)	Uncategorized Sample	7971	GPM22200020612	Cluster of | Neurospora crassa OR74A | 40S ribosomal protein S2 | protein | length=265 (NCU06047)	| Neurospora crassa OR74A | 40S ribosomal protein S2 | protein | length=265	NCU06047	Neurospora crassa OR74A_rev.fasta	28757.4	1	10	18	22	0.001	0.404
mcn10112019 (2)	Uncategorized Sample	7971	GPM22200020612	Cluster of | Neurospora crassa OR74A | 60S ribosomal protein L8 | protein | length=211 (NCU04779)	| Neurospora crassa OR74A | 60S ribosomal protein L8 | protein | length=211	NCU04779	Neurospora crassa OR74A_rev.fasta	23864.2	1	12	21	22	0.001	0.37
mcn10112019 (2)	Uncategorized Sample	7971	GPM22200020612	Cluster of | Neurospora crassa OR74A | SWI-SNF complex subunit | protein | length=570 (NCU03572)	| Neurospora crassa OR74A | SWI-SNF complex subunit | protein | length=570	NCU03572	Neurospora crassa OR74A_rev.fasta	63814.8	1	15	20	22	0.001	0.339
mcn10112019 (2)	Uncategorized Sample	7971	GPM22200020612	Cluster of | Neurospora crassa OR74A | mitochondrial ATP synthase alpha subunit | protein | length=551 (NCU02514)	| Neurospora crassa OR74A | mitochondrial ATP synthase alpha subunit | protein | length=551	NCU02514	Neurospora crassa OR74A_rev.fasta	59522.6	1	16	22	22	0.001	0.338
mcn10112019 (2)	Uncategorized Sample	7971	GPM22200020612	Cluster of | Neurospora crassa OR74A | RuvB-like helicase 2 | protein | length=481 (NCU06854)	| Neurospora crassa OR74A | RuvB-like helicase 2 | protein | length=481	NCU06854	Neurospora crassa OR74A_rev.fasta	52245.1	1	15	21	21	0.0009	0.351
mcn10112019 (2)	Uncategorized Sample	7971	GPM22200020612	Cluster of | Neurospora crassa OR74A | ATP-dependent RNA helicase ded-1 | protein | length=688 (NCU01369)	| Neurospora crassa OR74A | ATP-dependent RNA helicase ded-1 | protein | length=688	NCU01369	Neurospora crassa OR74A_rev.fasta	72057.1	1	16	20	21	0.0009	0.253
mcn10112019 (2)	Uncategorized Sample	7971	GPM22200020612	Cluster of | Neurospora crassa OR74A | histone acetyl transferase-2 | protein | length=1116 (NCU02556)	| Neurospora crassa OR74A | histone acetyl transferase-2 | protein | length=1116	NCU02556	Neurospora crassa OR74A_rev.fasta	125141	1	16	20	21	0.0009	0.187
mcn10112019 (2)	Uncategorized Sample	7971	GPM22200020612	Cluster of | Neurospora crassa OR74A | zinc knuckle domain-containing protein | protein | length=183 (NCU08923)	| Neurospora crassa OR74A | zinc knuckle domain-containing protein | protein | length=183	NCU08923	Neurospora crassa OR74A_rev.fasta	19038	1	10	19	20	0.0009	0.738
mcn10112019 (2)	Uncategorized Sample	7971	GPM22200020612	Cluster of | Neurospora crassa OR74A | zinc knuckle domain-containing protein, zinc knuckle domain-containing protein, variant 1 | protein | length=225 (NCU05800)	| Neurospora crassa OR74A | zinc knuckle domain-containing protein, zinc knuckle domain-containing protein, variant 1 | protein | length=225	NCU05800	Neurospora crassa OR74A_rev.fasta	23467.7	1	9	17	20	0.0009	0.649
mcn10112019 (2)	Uncategorized Sample	7971	GPM22200020612	Cluster of | Neurospora crassa OR74A | thiamine biosynthesis protein NMT-1 | protein | length=342 (NCU09345)	| Neurospora crassa OR74A | thiamine biosynthesis protein NMT-1 | protein | length=342	NCU09345	Neurospora crassa OR74A_rev.fasta	38199.9	1	13	19	20	0.0009	0.357
mcn10112019 (2)	Uncategorized Sample	7971	GPM22200020612	Cluster of | Neurospora crassa OR74A | 60S ribosomal protein L13 | protein | length=214 (NCU05554)	| Neurospora crassa OR74A | 60S ribosomal protein L13 | protein | length=214	NCU05554	Neurospora crassa OR74A_rev.fasta	23877.5	1	11	17	19	0.0008	0.537
mcn10112019 (2)	Uncategorized Sample	7971	GPM22200020612	Cluster of | Neurospora crassa OR74A | 40S ribosomal protein S5 | protein | length=213 (NCU09475)	| Neurospora crassa OR74A | 40S ribosomal protein S5 | protein | length=213	NCU09475	Neurospora crassa OR74A_rev.fasta	23680.4	1	11	17	19	0.0008	0.427
mcn10112019 (2)	Uncategorized Sample	7971	GPM22200020612	Cluster of | Neurospora crassa OR74A | alpha tubulin | protein | length=454 (NCU09132)	| Neurospora crassa OR74A | alpha tubulin | protein | length=454	NCU09132	Neurospora crassa OR74A_rev.fasta	50256.4	1	14	16	19	0.0008	0.421
mcn10112019 (2)	Uncategorized Sample	7971	GPM22200020612	Cluster of | Neurospora crassa OR74A | mitochondrial genome maintenance-1 | protein | length=337 (NCU05517)	| Neurospora crassa OR74A | mitochondrial genome maintenance-1 | protein | length=337	NCU05517	Neurospora crassa OR74A_rev.fasta	36463.6	1	10	17	19	0.0008	0.362
mcn10112019 (2)	Uncategorized Sample	7971	GPM22200020612	Cluster of | Neurospora crassa OR74A | RRM domain-containing protein, RRM domain-containing protein, variant 1 | protein | length=379 (NCU02152)	| Neurospora crassa OR74A | RRM domain-containing protein, RRM domain-containing protein, variant 1 | protein | length=379	NCU02152	Neurospora crassa OR74A_rev.fasta	40894.9	1	10	15	19	0.0008	0.237
mcn10112019 (2)	Uncategorized Sample	7971	GPM22200020612	Cluster of | Neurospora crassa OR74A | hir-1 | protein | length=1035 (NCU04035)	| Neurospora crassa OR74A | hir-1 | protein | length=1035	NCU04035	Neurospora crassa OR74A_rev.fasta	112440	1	16	19	19	0.0008	0.177
mcn10112019 (2)	Uncategorized Sample	7971	GPM22200020612	Cluster of | Neurospora crassa OR74A | clathrin heavy chain | protein | length=1678 (NCU02510)	| Neurospora crassa OR74A | clathrin heavy chain | protein | length=1678	NCU02510	Neurospora crassa OR74A_rev.fasta	190326	1	19	19	19	0.0008	0.159
mcn10112019 (2)	Uncategorized Sample	7971	GPM22200020612	Cluster of | Neurospora crassa OR74A | ubiquitin/ribosomal protein S27a, ubiquitin/ribosomal protein S27a, variant 1 | protein | length=154 (NCU04553)	| Neurospora crassa OR74A | ubiquitin/ribosomal protein S27a, ubiquitin/ribosomal protein S27a, variant 1 | protein | length=154	NCU04553	Neurospora crassa OR74A_rev.fasta	17739.3	1	5	10	18	0.0008	0.565
mcn10112019 (2)	Uncategorized Sample	7971	GPM22200020612	Cluster of | Neurospora crassa OR74A | 40S ribosomal protein S4 | protein | length=261 (NCU02181)	| Neurospora crassa OR74A | 40S ribosomal protein S4 | protein | length=261	NCU02181	Neurospora crassa OR74A_rev.fasta	29597.5	1	11	17	18	0.0008	0.441
mcn10112019 (2)	Uncategorized Sample	7971	GPM22200020612	Cluster of | Neurospora crassa OR74A | DNA repair-13 | protein | length=1111 (NCU05246)	| Neurospora crassa OR74A | DNA repair-13 | protein | length=1111	NCU05246	Neurospora crassa OR74A_rev.fasta	124291	1	15	18	18	0.0008	0.157
mcn10112019 (2)	Uncategorized Sample	7971	GPM22200020612	Cluster of | Neurospora crassa OR74A | pyridoxine 2 | protein | length=252 (NCU06549)	| Neurospora crassa OR74A | pyridoxine 2 | protein | length=252	NCU06549	Neurospora crassa OR74A_rev.fasta	27045.4	1	11	16	17	0.0007	0.631
mcn10112019 (2)	Uncategorized Sample	7971	GPM22200020612	Cluster of | Neurospora crassa OR74A | cell wall glucanosyltransferase Mwg1 | protein | length=364 (NCU05974)	| Neurospora crassa OR74A | cell wall glucanosyltransferase Mwg1 | protein | length=364	NCU05974	Neurospora crassa OR74A_rev.fasta	38491.5	1	14	17	17	0.0007	0.401
mcn10112019 (2)	Uncategorized Sample	7971	GPM22200020612	Cluster of | Neurospora crassa OR74A | isocitrate dehydrogenase subunit 1 | protein | length=385 (NCU00775)	| Neurospora crassa OR74A | isocitrate dehydrogenase subunit 1 | protein | length=385	NCU00775	Neurospora crassa OR74A_rev.fasta	42078.6	1	12	15	17	0.0007	0.366
mcn10112019 (2)	Uncategorized Sample	7971	GPM22200020612	Cluster of | Neurospora crassa OR74A | Ccr4-NOT transcription complex-1 | protein | length=640 (NCU03855)	| Neurospora crassa OR74A | Ccr4-NOT transcription complex-1 | protein | length=640	NCU03855	Neurospora crassa OR74A_rev.fasta	71518.7	1	15	17	17	0.0007	0.311
mcn10112019 (2)	Uncategorized Sample	7971	GPM22200020612	Cluster of | Neurospora crassa OR74A | transcriptional repressor rco-1 | protein | length=604 (NCU06205)	| Neurospora crassa OR74A | transcriptional repressor rco-1 | protein | length=604	NCU06205	Neurospora crassa OR74A_rev.fasta	66086.1	1	14	17	17	0.0007	0.283
mcn10112019 (2)	Uncategorized Sample	7971	GPM22200020612	Cluster of | Neurospora crassa OR74A | glutaminase-1 | protein | length=859 (NCU03648)	| Neurospora crassa OR74A | glutaminase-1 | protein | length=859	NCU03648	Neurospora crassa OR74A_rev.fasta	96272.4	1	12	16	17	0.0007	0.151
mcn10112019 (2)	Uncategorized Sample	7971	GPM22200020612	Cluster of | Neurospora crassa OR74A | hypothetical protein, hypothetical protein, variant 1 | protein | length=1410 (NCU00962)	| Neurospora crassa OR74A | hypothetical protein, hypothetical protein, variant 1 | protein | length=1410	NCU00962	Neurospora crassa OR74A_rev.fasta	157303	1	16	17	17	0.0007	0.124
mcn10112019 (2)	Uncategorized Sample	7971	GPM22200020612	Cluster of | Neurospora crassa OR74A | 40S ribosomal protein S14 | protein | length=150 (NCU07830)	| Neurospora crassa OR74A | 40S ribosomal protein S14 | protein | length=150	NCU07830	Neurospora crassa OR74A_rev.fasta	15997.9	1	12	16	16	0.0007	0.713
mcn10112019 (2)	Uncategorized Sample	7971	GPM22200020612	Cluster of | Neurospora crassa OR74A | 60S ribosomal protein L27 | protein | length=135 (NCU01827)	| Neurospora crassa OR74A | 60S ribosomal protein L27 | protein | length=135	NCU01827	Neurospora crassa OR74A_rev.fasta	15722.8	1	8	15	16	0.0007	0.452
mcn10112019 (2)	Uncategorized Sample	7971	GPM22200020612	Cluster of | Neurospora crassa OR74A | 40S ribosomal protein S6, 40S ribosomal protein S6, variant 1, 40S ribosomal protein S6, variant 2 | protein | length=239 (NCU08502)	| Neurospora crassa OR74A | 40S ribosomal protein S6, 40S ribosomal protein S6, variant 1, 40S ribosomal protein S6, variant 2 | protein | length=239	NCU08502	Neurospora crassa OR74A_rev.fasta	27331.8	1	11	15	16	0.0007	0.414
mcn10112019 (2)	Uncategorized Sample	7971	GPM22200020612	Cluster of | Neurospora crassa OR74A | DnaJ family protein | protein | length=414 (NCU07414)	| Neurospora crassa OR74A | DnaJ family protein | protein | length=414	NCU07414	Neurospora crassa OR74A_rev.fasta	45317.2	1	12	16	16	0.0007	0.36
mcn10112019 (2)	Uncategorized Sample	7971	GPM22200020612	Cluster of | Neurospora crassa OR74A | SIK1 | protein | length=521 (NCU06943)	| Neurospora crassa OR74A | SIK1 | protein | length=521	NCU06943	Neurospora crassa OR74A_rev.fasta	57575.7	1	12	15	16	0.0007	0.265
mcn10112019 (2)	Uncategorized Sample	7971	GPM22200020612	Cluster of | Neurospora crassa OR74A | RNA binding protein Jsn1 | protein | length=1208 (NCU06199)	| Neurospora crassa OR74A | RNA binding protein Jsn1 | protein | length=1208	NCU06199	Neurospora crassa OR74A_rev.fasta	130612	1	12	15	16	0.0007	0.131
mcn10112019 (2)	Uncategorized Sample	7971	GPM22200020612	Cluster of | Neurospora crassa OR74A | 40S ribosomal protein S11 | protein | length=161 (NCU03102)	| Neurospora crassa OR74A | 40S ribosomal protein S11 | protein | length=161	NCU03102	Neurospora crassa OR74A_rev.fasta	18428.9	1	10	15	15	0.0007	0.553
mcn10112019 (2)	Uncategorized Sample	7971	GPM22200020612	Cluster of | Neurospora crassa OR74A | elongation factor Tu | protein | length=437 (NCU03737)	| Neurospora crassa OR74A | elongation factor Tu | protein | length=437	NCU03737	Neurospora crassa OR74A_rev.fasta	47849.4	1	12	15	15	0.0007	0.325
mcn10112019 (2)	Uncategorized Sample	7971	GPM22200020612	Cluster of | Neurospora crassa OR74A | hypothetical protein | protein | length=527 (NCU07574)	| Neurospora crassa OR74A | hypothetical protein | protein | length=527	NCU07574	Neurospora crassa OR74A_rev.fasta	55890.1	1	12	14	15	0.0007	0.296
mcn10112019 (2)	Uncategorized Sample	7971	GPM22200020612	Cluster of | Neurospora crassa OR74A | SWI-SNF complex subunit | protein | length=732 (NCU00421)	| Neurospora crassa OR74A | SWI-SNF complex subunit | protein | length=732	NCU00421	Neurospora crassa OR74A_rev.fasta	79669	1	13	15	15	0.0007	0.209
mcn10112019 (2)	Uncategorized Sample	7971	GPM22200020612	Cluster of | Neurospora crassa OR74A | hypothetical protein | protein | length=716 (NCU03101)	| Neurospora crassa OR74A | hypothetical protein | protein | length=716	NCU03101	Neurospora crassa OR74A_rev.fasta	76352	1	10	14	15	0.0007	0.196
mcn10112019 (2)	Uncategorized Sample	7971	GPM22200020612	Cluster of | Neurospora crassa OR74A | 6-phosphofructokinase | protein | length=845 (NCU00629)	| Neurospora crassa OR74A | 6-phosphofructokinase | protein | length=845	NCU00629	Neurospora crassa OR74A_rev.fasta	92205.7	1	12	15	15	0.0007	0.157
mcn10112019 (2)	Uncategorized Sample	7971	GPM22200020612	Cluster of | Neurospora crassa OR74A | 60S ribosomal protein L19 | protein | length=192 (NCU05804)	| Neurospora crassa OR74A | 60S ribosomal protein L19 | protein | length=192	NCU05804	Neurospora crassa OR74A_rev.fasta	22348.8	1	10	14	14	0.0006	0.469
mcn10112019 (2)	Uncategorized Sample	7971	GPM22200020612	Cluster of | Neurospora crassa OR74A | 60S ribosomal protein L23 | protein | length=139 (NCU02905)	| Neurospora crassa OR74A | 60S ribosomal protein L23 | protein | length=139	NCU02905	Neurospora crassa OR74A_rev.fasta	14699.6	1	5	10	14	0.0006	0.396
mcn10112019 (2)	Uncategorized Sample	7971	GPM22200020612	Cluster of | Neurospora crassa OR74A | polyadenylation-13 | protein | length=264 (NCU09014)	| Neurospora crassa OR74A | polyadenylation-13 | protein | length=264	NCU09014	Neurospora crassa OR74A_rev.fasta	29808.3	1	9	13	14	0.0006	0.356
mcn10112019 (2)	Uncategorized Sample	7971	GPM22200020612	Cluster of | Neurospora crassa OR74A | RuvB-like helicase 1 | protein | length=458 (NCU03482)	| Neurospora crassa OR74A | RuvB-like helicase 1 | protein | length=458	NCU03482	Neurospora crassa OR74A_rev.fasta	49812.3	1	11	14	14	0.0006	0.325
mcn10112019 (2)	Uncategorized Sample	7971	GPM22200020612	Cluster of | Neurospora crassa OR74A | glycine rich protein | protein | length=966 (NCU03493)	| Neurospora crassa OR74A | glycine rich protein | protein | length=966	NCU03493	Neurospora crassa OR74A_rev.fasta	102823	1	14	14	14	0.0006	0.19
mcn10112019 (2)	Uncategorized Sample	7971	GPM22200020612	Cluster of | Neurospora crassa OR74A | 26S proteasome regulatory subunit Rpn2 | protein | length=1188 (NCU09450)	| Neurospora crassa OR74A | 26S proteasome regulatory subunit Rpn2 | protein | length=1188	NCU09450	Neurospora crassa OR74A_rev.fasta	127970	1	13	14	14	0.0006	0.136
mcn10112019 (2)	Uncategorized Sample	7971	GPM22200020612	Cluster of | Neurospora crassa OR74A | arid/bright domain-containing protein | protein | length=1289 (NCU05891)	| Neurospora crassa OR74A | arid/bright domain-containing protein | protein | length=1289	NCU05891	Neurospora crassa OR74A_rev.fasta	139449	1	13	14	14	0.0006	0.114
mcn10112019 (2)	Uncategorized Sample	7971	GPM22200020612	Cluster of | Neurospora crassa OR74A | SNF2 family helicase/ATPase, SNF2 family helicase/ATPase, variant 1 | protein | length=1997 (NCU08919)	| Neurospora crassa OR74A | SNF2 family helicase/ATPase, SNF2 family helicase/ATPase, variant 1 | protein | length=1997	NCU08919	Neurospora crassa OR74A_rev.fasta	223080	1	14	14	14	0.0006	0.0951
mcn10112019 (2)	Uncategorized Sample	7971	GPM22200020612	Cluster of | Neurospora crassa OR74A | hypothetical protein | protein | length=1955 (NCU06484)	| Neurospora crassa OR74A | hypothetical protein | protein | length=1955	NCU06484	Neurospora crassa OR74A_rev.fasta	214393	1	14	14	14	0.0006	0.0849
mcn10112019 (2)	Uncategorized Sample	7971	GPM22200020612	Cluster of | Neurospora crassa OR74A | 60S ribosomal protein L10a | protein | length=217 (NCU00294)	| Neurospora crassa OR74A | 60S ribosomal protein L10a | protein | length=217	NCU00294	Neurospora crassa OR74A_rev.fasta	24127.5	1	8	12	13	0.0006	0.406
mcn10112019 (2)	Uncategorized Sample	7971	GPM22200020612	Cluster of | Neurospora crassa OR74A | Histone H3 | protein | length=136 (NCU01635)	| Neurospora crassa OR74A | Histone H3 | protein | length=136	NCU01635	Neurospora crassa OR74A_rev.fasta	15392.6	1	5	8	13	0.0006	0.404
mcn10112019 (2)	Uncategorized Sample	7971	GPM22200020612	Cluster of | Neurospora crassa OR74A | WD domain-containing protein, WD domain-containing protein, variant 1 | protein | length=352 (NCU00879)	| Neurospora crassa OR74A | WD domain-containing protein, WD domain-containing protein, variant 1 | protein | length=352	NCU00879	Neurospora crassa OR74A_rev.fasta	38343.9	1	11	13	13	0.0006	0.403
mcn10112019 (2)	Uncategorized Sample	7971	GPM22200020612	Cluster of | Neurospora crassa OR74A | rRNA 2'-O-methyltransferase fibrillarin | protein | length=323 (NCU03702)	| Neurospora crassa OR74A | rRNA 2'-O-methyltransferase fibrillarin | protein | length=323	NCU03702	Neurospora crassa OR74A_rev.fasta	33812.8	1	10	13	13	0.0006	0.399
mcn10112019 (2)	Uncategorized Sample	7971	GPM22200020612	Cluster of | Neurospora crassa OR74A | hypothetical protein | protein | length=355 (NCU07329)	| Neurospora crassa OR74A | hypothetical protein | protein | length=355	NCU07329	Neurospora crassa OR74A_rev.fasta	38701.4	1	11	13	13	0.0006	0.383
mcn10112019 (2)	Uncategorized Sample	7971	GPM22200020612	Cluster of | Neurospora crassa OR74A | nucleolar protein nop-58 | protein | length=597 (NCU03396)	| Neurospora crassa OR74A | nucleolar protein nop-58 | protein | length=597	NCU03396	Neurospora crassa OR74A_rev.fasta	66085.4	1	12	13	13	0.0006	0.255
mcn10112019 (2)	Uncategorized Sample	7971	GPM22200020612	Cluster of | Neurospora crassa OR74A | Pyruvate decarboxylase | protein | length=576 (NCU02397)	| Neurospora crassa OR74A | Pyruvate decarboxylase | protein | length=576	NCU02397	Neurospora crassa OR74A_rev.fasta	64244.8	1	11	13	13	0.0006	0.24
mcn10112019 (2)	Uncategorized Sample	7971	GPM22200020612	Cluster of | Neurospora crassa OR74A | Pyruvate decarboxylase, pyruvate decarboxylase, variant 1 | protein | length=570 (NCU02193)	| Neurospora crassa OR74A | Pyruvate decarboxylase, pyruvate decarboxylase, variant 1 | protein | length=570	NCU02193	Neurospora crassa OR74A_rev.fasta	62263.4	1	10	12	13	0.0006	0.23
mcn10112019 (2)	Uncategorized Sample	7971	GPM22200020612	Cluster of | Neurospora crassa OR74A | porin-binding domain protein-4 | protein | length=628 (NCU03064)	| Neurospora crassa OR74A | porin-binding domain protein-4 | protein | length=628	NCU03064	Neurospora crassa OR74A_rev.fasta	68495.7	1	11	13	13	0.0006	0.194
mcn10112019 (2)	Uncategorized Sample	7971	GPM22200020612	Cluster of Serum albumin OS=Homo sapiens GN=ALB PE=1 SV=2 (sp|P02768|ALBU_HUMAN)	Serum albumin OS=Homo sapiens GN=ALB PE=1 SV=2	sp|P02768|ALBU_HUMAN	Neurospora crassa OR74A_rev.fasta	69366.9	1	10	10	13	0.0006	0.179
mcn10112019 (2)	Uncategorized Sample	7971	GPM22200020612	Cluster of | Neurospora crassa OR74A | 60S ribosomal protein L9 | protein | length=193 (NCU02744)	| Neurospora crassa OR74A | 60S ribosomal protein L9 | protein | length=193	NCU02744	Neurospora crassa OR74A_rev.fasta	21752	1	10	12	12	0.0005	0.44
mcn10112019 (2)	Uncategorized Sample	7971	GPM22200020612	Cluster of | Neurospora crassa OR74A | hypothetical protein | protein | length=163 (NCU06743)	| Neurospora crassa OR74A | hypothetical protein | protein | length=163	NCU06743	Neurospora crassa OR74A_rev.fasta	18432.2	1	8	11	12	0.0005	0.423
mcn10112019 (2)	Uncategorized Sample	7971	GPM22200020612	Cluster of | Neurospora crassa OR74A | zinc-containing alcohol dehydrogenase | protein | length=346 (NCU09285)	| Neurospora crassa OR74A | zinc-containing alcohol dehydrogenase | protein | length=346	NCU09285	Neurospora crassa OR74A_rev.fasta	37295.6	1	10	10	12	0.0005	0.405
mcn10112019 (2)	Uncategorized Sample	7971	GPM22200020612	Cluster of | Neurospora crassa OR74A | hypothetical protein | protein | length=360 (NCU03809)	| Neurospora crassa OR74A | hypothetical protein | protein | length=360	NCU03809	Neurospora crassa OR74A_rev.fasta	37737.4	1	7	10	12	0.0005	0.308
mcn10112019 (2)	Uncategorized Sample	7971	GPM22200020612	Cluster of | Neurospora crassa OR74A | hypothetical protein, hypothetical protein, variant 1 | protein | length=485 (NCU11372)	| Neurospora crassa OR74A | hypothetical protein, hypothetical protein, variant 1 | protein | length=485	NCU11372	Neurospora crassa OR74A_rev.fasta	52119.6	1	10	12	12	0.0005	0.264
mcn10112019 (2)	Uncategorized Sample	7971	GPM22200020612	Cluster of | Neurospora crassa OR74A | RNP domain-containing protein, RNP domain-containing protein, variant 1, RNP domain-containing protein, variant 2, RNP domain-containing protein, variant 3 | protein | length=483 (NCU02404)	| Neurospora crassa OR74A | RNP domain-containing protein, RNP domain-containing protein, variant 1, RNP domain-containing protein, variant 2, RNP domain-containing protein, variant 3 | protein | length=483	NCU02404	Neurospora crassa OR74A_rev.fasta	51538.3	1	10	12	12	0.0005	0.257
mcn10112019 (2)	Uncategorized Sample	7971	GPM22200020612	Cluster of | Neurospora crassa OR74A | hypothetical protein | protein | length=773 (NCU02006)	| Neurospora crassa OR74A | hypothetical protein | protein | length=773	NCU02006	Neurospora crassa OR74A_rev.fasta	81154.9	1	11	12	12	0.0005	0.204
mcn10112019 (2)	Uncategorized Sample	7971	GPM22200020612	Cluster of | Neurospora crassa OR74A | WD repeat-containing protein | protein | length=521 (NCU09302)	| Neurospora crassa OR74A | WD repeat-containing protein | protein | length=521	NCU09302	Neurospora crassa OR74A_rev.fasta	57657.7	1	9	12	12	0.0005	0.198
mcn10112019 (2)	Uncategorized Sample	7971	GPM22200020612	Cluster of | Neurospora crassa OR74A | glucose-repressible alcohol dehydrogenase transcriptional effector, glucose-repressible alcohol dehydrogenase transcriptional effector, variant 1 | protein | length=793 (NCU07779)	| Neurospora crassa OR74A | glucose-repressible alcohol dehydrogenase transcriptional effector, glucose-repressible alcohol dehydrogenase transcriptional effector, variant 1 | protein | length=793	NCU07779	Neurospora crassa OR74A_rev.fasta	88753.3	1	11	12	12	0.0005	0.178
mcn10112019 (2)	Uncategorized Sample	7971	GPM22200020612	Cluster of | Neurospora crassa OR74A | hypothetical protein | protein | length=748 (NCU00573)	| Neurospora crassa OR74A | hypothetical protein | protein | length=748	NCU00573	Neurospora crassa OR74A_rev.fasta	81668.1	1	10	12	12	0.0005	0.163
mcn10112019 (2)	Uncategorized Sample	7971	GPM22200020612	Cluster of | Neurospora crassa OR74A | hypothetical protein | protein | length=1037 (NCU05400)	| Neurospora crassa OR74A | hypothetical protein | protein | length=1037	NCU05400	Neurospora crassa OR74A_rev.fasta	113015	1	10	11	12	0.0005	0.153
mcn10112019 (2)	Uncategorized Sample	7971	GPM22200020612	Cluster of | Neurospora crassa OR74A | interferon-induced GTP-binding protein Mx2 | protein | length=750 (NCU05693)	| Neurospora crassa OR74A | interferon-induced GTP-binding protein Mx2 | protein | length=750	NCU05693	Neurospora crassa OR74A_rev.fasta	85111.2	1	9	12	12	0.0005	0.124
mcn10112019 (2)	Uncategorized Sample	7971	GPM22200020612	Cluster of | Neurospora crassa OR74A | ATP-dependent helicase NAM7 | protein | length=1093 (NCU04242)	| Neurospora crassa OR74A | ATP-dependent helicase NAM7 | protein | length=1093	NCU04242	Neurospora crassa OR74A_rev.fasta	120089	1	11	12	12	0.0005	0.12
mcn10112019 (2)	Uncategorized Sample	7971	GPM22200020612	Cluster of | Neurospora crassa OR74A | 40S ribosomal protein S29 | protein | length=56 (NCU03738)	| Neurospora crassa OR74A | 40S ribosomal protein S29 | protein | length=56	NCU03738	Neurospora crassa OR74A_rev.fasta	6500.5	1	5	10	11	0.0005	0.696
mcn10112019 (2)	Uncategorized Sample	7971	GPM22200020612	Cluster of | Neurospora crassa OR74A | 40S ribosomal protein S17 | protein | length=146 (NCU07014)	| Neurospora crassa OR74A | 40S ribosomal protein S17 | protein | length=146	NCU07014	Neurospora crassa OR74A_rev.fasta	16943	1	7	11	11	0.0005	0.589
mcn10112019 (2)	Uncategorized Sample	7971	GPM22200020612	Cluster of | Neurospora crassa OR74A | 60S ribosomal protein L20, 60S ribosomal protein L20, variant 1 | protein | length=148 (NCU08389)	| Neurospora crassa OR74A | 60S ribosomal protein L20, 60S ribosomal protein L20, variant 1 | protein | length=148	NCU08389	Neurospora crassa OR74A_rev.fasta	17334.2	1	9	10	11	0.0005	0.432
mcn10112019 (2)	Uncategorized Sample	7971	GPM22200020612	Cluster of | Neurospora crassa OR74A | ssDNA binding protein, ssDNA binding protein, variant 1 | protein | length=222 (NCU00137)	| Neurospora crassa OR74A | ssDNA binding protein, ssDNA binding protein, variant 1 | protein | length=222	NCU00137	Neurospora crassa OR74A_rev.fasta	25040.1	1	8	10	11	0.0005	0.369
mcn10112019 (2)	Uncategorized Sample	7971	GPM22200020612	Cluster of | Neurospora crassa OR74A | 60s ribosomal protein L24 | protein | length=156 (NCU03150)	| Neurospora crassa OR74A | 60s ribosomal protein L24 | protein | length=156	NCU03150	Neurospora crassa OR74A_rev.fasta	17612.1	1	8	10	11	0.0005	0.359
mcn10112019 (2)	Uncategorized Sample	7971	GPM22200020612	Cluster of | Neurospora crassa OR74A | 60S ribosomal protein P0, 60S ribosomal protein P0, variant 1 | protein | length=313 (NCU07408)	| Neurospora crassa OR74A | 60S ribosomal protein P0, 60S ribosomal protein P0, variant 1 | protein | length=313	NCU07408	Neurospora crassa OR74A_rev.fasta	33535.1	1	7	9	11	0.0005	0.323
mcn10112019 (2)	Uncategorized Sample	7971	GPM22200020612	Cluster of | Neurospora crassa OR74A | eIF4A | protein | length=397 (NCU07420)	| Neurospora crassa OR74A | eIF4A | protein | length=397	NCU07420	Neurospora crassa OR74A_rev.fasta	44845.4	1	9	10	11	0.0005	0.322
mcn10112019 (2)	Uncategorized Sample	7971	GPM22200020612	Cluster of | Neurospora crassa OR74A | casein kinase I isoform delta, casein kinase I isoform delta, variant 1, casein kinase I isoform delta, variant 2 | protein | length=361 (NCU00685)	| Neurospora crassa OR74A | casein kinase I isoform delta, casein kinase I isoform delta, variant 1, casein kinase I isoform delta, variant 2 | protein | length=361	NCU00685	Neurospora crassa OR74A_rev.fasta	41273.1	1	9	11	11	0.0005	0.319
mcn10112019 (2)	Uncategorized Sample	7971	GPM22200020612	Cluster of | Neurospora crassa OR74A | ribosomal protein S12 | protein | length=152 (NCU00971)	| Neurospora crassa OR74A | ribosomal protein S12 | protein | length=152	NCU00971	Neurospora crassa OR74A_rev.fasta	17383.3	1	5	10	11	0.0005	0.276
mcn10112019 (2)	Uncategorized Sample	7971	GPM22200020612	Cluster of | Neurospora crassa OR74A | 60S ribosomal protein L10 | protein | length=221 (NCU08964)	| Neurospora crassa OR74A | 60S ribosomal protein L10 | protein | length=221	NCU08964	Neurospora crassa OR74A_rev.fasta	25326.4	1	5	7	11	0.0005	0.217
mcn10112019 (2)	Uncategorized Sample	7971	GPM22200020612	Cluster of | Neurospora crassa OR74A | DNA polymerase epsilon subunit C | protein | length=404 (NCU06405)	| Neurospora crassa OR74A | DNA polymerase epsilon subunit C | protein | length=404	NCU06405	Neurospora crassa OR74A_rev.fasta	44856.4	1	7	11	11	0.0005	0.205
mcn10112019 (2)	Uncategorized Sample	7971	GPM22200020612	Cluster of | Neurospora crassa OR74A | hypothetical protein | protein | length=651 (NCU04018)	| Neurospora crassa OR74A | hypothetical protein | protein | length=651	NCU04018	Neurospora crassa OR74A_rev.fasta	71433.7	1	9	10	11	0.0005	0.189
mcn10112019 (2)	Uncategorized Sample	7971	GPM22200020612	Cluster of | Neurospora crassa OR74A | 1,4-alpha-glucan branching enzyme, 1,4-alpha-glucan branching enzyme, variant 1 | protein | length=705 (NCU05429)	| Neurospora crassa OR74A | 1,4-alpha-glucan branching enzyme, 1,4-alpha-glucan branching enzyme, variant 1 | protein | length=705	NCU05429	Neurospora crassa OR74A_rev.fasta	80526.6	1	10	10	11	0.0005	0.186
mcn10112019 (2)	Uncategorized Sample	7971	GPM22200020612	Cluster of | Neurospora crassa OR74A | non-anchored cell wall protein 1 | protein | length=691 (NCU05137)	| Neurospora crassa OR74A | non-anchored cell wall protein 1 | protein | length=691	NCU05137	Neurospora crassa OR74A_rev.fasta	75679.9	1	9	11	11	0.0005	0.184
mcn10112019 (2)	Uncategorized Sample	7971	GPM22200020612	Cluster of | Neurospora crassa OR74A | hypothetical protein | protein | length=836 (NCU02223)	| Neurospora crassa OR74A | hypothetical protein | protein | length=836	NCU02223	Neurospora crassa OR74A_rev.fasta	90710	1	10	11	11	0.0005	0.169
mcn10112019 (2)	Uncategorized Sample	7971	GPM22200020612	Cluster of | Neurospora crassa OR74A | hypothetical protein | protein | length=930 (NCU02012)	| Neurospora crassa OR74A | hypothetical protein | protein | length=930	NCU02012	Neurospora crassa OR74A_rev.fasta	102986	1	10	11	11	0.0005	0.139
mcn10112019 (2)	Uncategorized Sample	7971	GPM22200020612	Cluster of | Neurospora crassa OR74A | heterogeneous nuclear ribonucleoprotein HRP1 | protein | length=670 (NCU17030)	| Neurospora crassa OR74A | heterogeneous nuclear ribonucleoprotein HRP1 | protein | length=670	NCU17030	Neurospora crassa OR74A_rev.fasta	69750.2	1	6	11	11	0.0005	0.127
mcn10112019 (2)	Uncategorized Sample	7971	GPM22200020612	Cluster of | Neurospora crassa OR74A | 40S ribosomal protein S9 | protein | length=190 (NCU01949)	| Neurospora crassa OR74A | 40S ribosomal protein S9 | protein | length=190	NCU01949	Neurospora crassa OR74A_rev.fasta	21807.1	1	9	10	10	0.0004	0.411
mcn10112019 (2)	Uncategorized Sample	7971	GPM22200020612	Cluster of | Neurospora crassa OR74A | 60S ribosomal protein L38 | protein | length=80 (NCU03635)	| Neurospora crassa OR74A | 60S ribosomal protein L38 | protein | length=80	NCU03635	Neurospora crassa OR74A_rev.fasta	9149.6	1	4	5	10	0.0004	0.387
mcn10112019 (2)	Uncategorized Sample	7971	GPM22200020612	Cluster of | Neurospora crassa OR74A | 60S ribosomal protein L12 | protein | length=165 (NCU01317)	| Neurospora crassa OR74A | 60S ribosomal protein L12 | protein | length=165	NCU01317	Neurospora crassa OR74A_rev.fasta	17693.6	1	4	6	10	0.0004	0.339
mcn10112019 (2)	Uncategorized Sample	7971	GPM22200020612	Cluster of | Neurospora crassa OR74A | alcohol dehydrogenase I, alcohol dehydrogenase I, variant 1 | protein | length=353 (NCU01754)	| Neurospora crassa OR74A | alcohol dehydrogenase I, alcohol dehydrogenase I, variant 1 | protein | length=353	NCU01754	Neurospora crassa OR74A_rev.fasta	37442.7	1	8	10	10	0.0004	0.334
mcn10112019 (2)	Uncategorized Sample	7971	GPM22200020612	Cluster of | Neurospora crassa OR74A | transaldolase | protein | length=324 (NCU02136)	| Neurospora crassa OR74A | transaldolase | protein | length=324	NCU02136	Neurospora crassa OR74A_rev.fasta	35230.5	1	9	10	10	0.0004	0.29
mcn10112019 (2)	Uncategorized Sample	7971	GPM22200020612	Cluster of | Neurospora crassa OR74A | 60S ribosomal protein L2 | protein | length=254 (NCU00413)	| Neurospora crassa OR74A | 60S ribosomal protein L2 | protein | length=254	NCU00413	Neurospora crassa OR74A_rev.fasta	27356.6	1	5	10	10	0.0004	0.26
mcn10112019 (2)	Uncategorized Sample	7971	GPM22200020612	Cluster of | Neurospora crassa OR74A | Glu/Leu/Phe/Val dehydrogenase | protein | length=454 (NCU01195)	| Neurospora crassa OR74A | Glu/Leu/Phe/Val dehydrogenase | protein | length=454	NCU01195	Neurospora crassa OR74A_rev.fasta	48853.6	1	9	10	10	0.0004	0.253
mcn10112019 (2)	Uncategorized Sample	7971	GPM22200020612	Cluster of | Neurospora crassa OR74A | S-adenosylmethionine synthetase, s-adenosylmethionine synthetase, variant 1 | protein | length=395 (NCU02657)	| Neurospora crassa OR74A | S-adenosylmethionine synthetase, s-adenosylmethionine synthetase, variant 1 | protein | length=395	NCU02657	Neurospora crassa OR74A_rev.fasta	42987.1	1	7	10	10	0.0004	0.248
mcn10112019 (2)	Uncategorized Sample	7971	GPM22200020612	Cluster of | Neurospora crassa OR74A | zinc finger transcription factor-33 | protein | length=785 (NCU05064)	| Neurospora crassa OR74A | zinc finger transcription factor-33 | protein | length=785	NCU05064	Neurospora crassa OR74A_rev.fasta	85235.7	1	9	10	10	0.0004	0.186
mcn10112019 (2)	Uncategorized Sample	7971	GPM22200020612	Cluster of | Neurospora crassa OR74A | Sec23/Sec24 family protein | protein | length=1052 (NCU06868)	| Neurospora crassa OR74A | Sec23/Sec24 family protein | protein | length=1052	NCU06868	Neurospora crassa OR74A_rev.fasta	115000	1	8	9	10	0.0004	0.128
mcn10112019 (2)	Uncategorized Sample	7971	GPM22200020612	Cluster of | Neurospora crassa OR74A | Plasma membrane ATPase | protein | length=920 (NCU01680)	| Neurospora crassa OR74A | Plasma membrane ATPase | protein | length=920	NCU01680	Neurospora crassa OR74A_rev.fasta	99888.3	1	9	9	10	0.0004	0.127
mcn10112019 (2)	Uncategorized Sample	7971	GPM22200020612	Cluster of | Neurospora crassa OR74A | 40S ribosomal protein S25 | protein | length=97 (NCU09476)	| Neurospora crassa OR74A | 40S ribosomal protein S25 | protein | length=97	NCU09476	Neurospora crassa OR74A_rev.fasta	10798.1	1	7	9	9	0.0004	0.526
mcn10112019 (2)	Uncategorized Sample	7971	GPM22200020612	Cluster of | Neurospora crassa OR74A | ubiquitin/ribosomal protein S27a, ubiquitin/ribosomal protein S27a, variant 1 | protein | length=154 (NCU04553)	| Neurospora crassa OR74A | ubiquitin fusion protein | protein | length=128	NCU05275	Neurospora crassa OR74A_rev.fasta	14638	0.971	0	0	9	0.0004	0.445
mcn10112019 (2)	Uncategorized Sample	7971	GPM22200020612	Cluster of | Neurospora crassa OR74A | 40S ribosomal protein S16 | protein | length=142 (NCU08620)	| Neurospora crassa OR74A | 40S ribosomal protein S16 | protein | length=142	NCU08620	Neurospora crassa OR74A_rev.fasta	15723.9	1	6	7	9	0.0004	0.415
mcn10112019 (2)	Uncategorized Sample	7971	GPM22200020612	Cluster of | Neurospora crassa OR74A | 60S ribosomal protein L30 | protein | length=109 (NCU08963)	| Neurospora crassa OR74A | 60S ribosomal protein L30 | protein | length=109	NCU08963	Neurospora crassa OR74A_rev.fasta	11703.5	1	4	6	9	0.0004	0.394
mcn10112019 (2)	Uncategorized Sample	7971	GPM22200020612	Cluster of | Neurospora crassa OR74A | hypothetical protein | protein | length=279 (NCU09616)	| Neurospora crassa OR74A | hypothetical protein | protein | length=279	NCU09616	Neurospora crassa OR74A_rev.fasta	32103.9	1	7	9	9	0.0004	0.362
mcn10112019 (2)	Uncategorized Sample	7971	GPM22200020612	Cluster of | Neurospora crassa OR74A | transcription initiation factor-8 | protein | length=226 (NCU00444)	| Neurospora crassa OR74A | transcription initiation factor-8 | protein | length=226	NCU00444	Neurospora crassa OR74A_rev.fasta	26127.2	1	6	8	9	0.0004	0.323
mcn10112019 (2)	Uncategorized Sample	7971	GPM22200020612	Cluster of | Neurospora crassa OR74A | hypothetical protein | protein | length=227 (NCU01475)	| Neurospora crassa OR74A | hypothetical protein | protein | length=227	NCU01475	Neurospora crassa OR74A_rev.fasta	24823.4	1	7	9	9	0.0004	0.295
mcn10112019 (2)	Uncategorized Sample	7971	GPM22200020612	Cluster of | Neurospora crassa OR74A | hypothetical protein | protein | length=150 (NCU06210)	| Neurospora crassa OR74A | hypothetical protein | protein | length=150	NCU06210	Neurospora crassa OR74A_rev.fasta	15979.6	1	6	9	9	0.0004	0.287
mcn10112019 (2)	Uncategorized Sample	7971	GPM22200020612	Cluster of | Neurospora crassa OR74A | ribosome-associated protein | protein | length=290 (NCU03393)	| Neurospora crassa OR74A | ribosome-associated protein | protein | length=290	NCU03393	Neurospora crassa OR74A_rev.fasta	31500.9	1	7	9	9	0.0004	0.248
mcn10112019 (2)	Uncategorized Sample	7971	GPM22200020612	Cluster of | Neurospora crassa OR74A | hypothetical protein | protein | length=432 (NCU07875)	| Neurospora crassa OR74A | hypothetical protein | protein | length=432	NCU07875	Neurospora crassa OR74A_rev.fasta	44435.1	1	7	9	9	0.0004	0.245
mcn10112019 (2)	Uncategorized Sample	7971	GPM22200020612	Cluster of | Neurospora crassa OR74A | enolase, enolase, variant 1 | protein | length=438 (NCU10042)	| Neurospora crassa OR74A | enolase, enolase, variant 1 | protein | length=438	NCU10042	Neurospora crassa OR74A_rev.fasta	47595.3	1	7	9	9	0.0004	0.221
mcn10112019 (2)	Uncategorized Sample	7971	GPM22200020612	Cluster of | Neurospora crassa OR74A | 60S ribosomal protein L16, 60S ribosomal protein L16, variant 1 | protein | length=231 (NCU01221)	| Neurospora crassa OR74A | 60S ribosomal protein L16, 60S ribosomal protein L16, variant 1 | protein | length=231	NCU01221	Neurospora crassa OR74A_rev.fasta	26128.7	1	7	8	9	0.0004	0.199
mcn10112019 (2)	Uncategorized Sample	7971	GPM22200020612	Cluster of | Neurospora crassa OR74A | hypothetical protein, hypothetical protein, variant 1, hypothetical protein, variant 2 | protein | length=667 (NCU11000)	| Neurospora crassa OR74A | hypothetical protein, hypothetical protein, variant 1, hypothetical protein, variant 2 | protein | length=667	NCU11000	Neurospora crassa OR74A_rev.fasta	70401.4	1	9	9	9	0.0004	0.165
mcn10112019 (2)	Uncategorized Sample	7971	GPM22200020612	Cluster of | Neurospora crassa OR74A | heat shock protein 80 | protein | length=705 (NCU04142)	| Neurospora crassa OR74A | heat shock protein 80 | protein | length=705	NCU04142	Neurospora crassa OR74A_rev.fasta	80192.5	1	9	9	9	0.0004	0.155
mcn10112019 (2)	Uncategorized Sample	7971	GPM22200020612	Cluster of | Neurospora crassa OR74A | methionine synthase | protein | length=769 (NCU06512)	| Neurospora crassa OR74A | methionine synthase | protein | length=769	NCU06512	Neurospora crassa OR74A_rev.fasta	86313.5	1	8	9	9	0.0004	0.129
mcn10112019 (2)	Uncategorized Sample	7971	GPM22200020612	Cluster of | Neurospora crassa OR74A | protein transporter sec-23 | protein | length=775 (NCU01318)	| Neurospora crassa OR74A | protein transporter sec-23 | protein | length=775	NCU01318	Neurospora crassa OR74A_rev.fasta	86280.6	1	9	9	9	0.0004	0.121
mcn10112019 (2)	Uncategorized Sample	7971	GPM22200020612	Cluster of | Neurospora crassa OR74A | 26S proteasome regulatory subunit Rpn1 | protein | length=902 (NCU07721)	| Neurospora crassa OR74A | 26S proteasome regulatory subunit Rpn1 | protein | length=902	NCU07721	Neurospora crassa OR74A_rev.fasta	100254	1	9	9	9	0.0004	0.119
mcn10112019 (2)	Uncategorized Sample	7971	GPM22200020612	Cluster of | Neurospora crassa OR74A | replication factor C subunit 1 | protein | length=1086 (NCU06767)	| Neurospora crassa OR74A | replication factor C subunit 1 | protein | length=1086	NCU06767	Neurospora crassa OR74A_rev.fasta	119101	1	8	9	9	0.0004	0.106
mcn10112019 (2)	Uncategorized Sample	7971	GPM22200020612	Cluster of | Neurospora crassa OR74A | hypothetical protein | protein | length=1542 (NCU03962)	| Neurospora crassa OR74A | hypothetical protein | protein | length=1542	NCU03962	Neurospora crassa OR74A_rev.fasta	168956	1	9	9	9	0.0004	0.072
mcn10112019 (2)	Uncategorized Sample	7971	GPM22200020612	Cluster of | Neurospora crassa OR74A | histone acetylase complex subunit Paf400 | protein | length=3895 (NCU01379)	| Neurospora crassa OR74A | histone acetylase complex subunit Paf400 | protein | length=3895	NCU01379	Neurospora crassa OR74A_rev.fasta	443294	1	8	8	9	0.0004	0.0246
mcn10112019 (2)	Uncategorized Sample	7971	GPM22200020612	Cluster of | Neurospora crassa OR74A | ribosomal protein L27a.e | protein | length=149 (NCU03806)	| Neurospora crassa OR74A | ribosomal protein L27a.e | protein | length=149	NCU03806	Neurospora crassa OR74A_rev.fasta	16597.2	1	7	8	8	0.0003	0.53
mcn10112019 (2)	Uncategorized Sample	7971	GPM22200020612	Cluster of | Neurospora crassa OR74A | woronin body major protein | protein | length=176 (NCU08332)	| Neurospora crassa OR74A | woronin body major protein | protein | length=176	NCU08332	Neurospora crassa OR74A_rev.fasta	19126	1	6	8	8	0.0003	0.483
mcn10112019 (2)	Uncategorized Sample	7971	GPM22200020612	Cluster of | Neurospora crassa OR74A | hypothetical protein | protein | length=129 (NCU07856)	| Neurospora crassa OR74A | hypothetical protein | protein | length=129	NCU07856	Neurospora crassa OR74A_rev.fasta	14995.2	1	7	8	8	0.0003	0.481
mcn10112019 (2)	Uncategorized Sample	7971	GPM22200020612	Cluster of | Neurospora crassa OR74A | 60S ribosomal protein L33 | protein | length=109 (NCU09109)	| Neurospora crassa OR74A | 60S ribosomal protein L33 | protein | length=109	NCU09109	Neurospora crassa OR74A_rev.fasta	12178.2	1	3	6	8	0.0003	0.33
mcn10112019 (2)	Uncategorized Sample	7971	GPM22200020612	Cluster of | Neurospora crassa OR74A | Ras superfamily GTPase | protein | length=189 (NCU11181)	| Neurospora crassa OR74A | Ras superfamily GTPase | protein | length=189	NCU11181	Neurospora crassa OR74A_rev.fasta	21583.5	1	6	8	8	0.0003	0.328
mcn10112019 (2)	Uncategorized Sample	7971	GPM22200020612	Cluster of | Neurospora crassa OR74A | ubiquitin/ribosomal protein S27a, ubiquitin/ribosomal protein S27a, variant 1 | protein | length=154 (NCU04553)	Ubiquitin-40S ribosomal protein S27a OS=Homo sapiens GN=RPS27A PE=1 SV=2	sp|P62979|RS27A_HUMAN	Neurospora crassa OR74A_rev.fasta	17965.6	0.988	1	1	8	0.0003	0.301
mcn10112019 (2)	Uncategorized Sample	7971	GPM22200020612	Cluster of | Neurospora crassa OR74A | 60S ribosomal protein L7 | protein | length=248 (NCU07829)	| Neurospora crassa OR74A | 60S ribosomal protein L7 | protein | length=248	NCU07829	Neurospora crassa OR74A_rev.fasta	28689	1	7	8	8	0.0003	0.294
mcn10112019 (2)	Uncategorized Sample	7971	GPM22200020612	Cluster of | Neurospora crassa OR74A | activator 1 41 kDa subunit | protein | length=387 (NCU02687)	| Neurospora crassa OR74A | activator 1 41 kDa subunit | protein | length=387	NCU02687	Neurospora crassa OR74A_rev.fasta	42730	1	8	8	8	0.0003	0.266
mcn10112019 (2)	Uncategorized Sample	7971	GPM22200020612	Cluster of | Neurospora crassa OR74A | guanine nucleotide-binding protein subunit beta-like protein | protein | length=316 (NCU05810)	| Neurospora crassa OR74A | guanine nucleotide-binding protein subunit beta-like protein | protein | length=316	NCU05810	Neurospora crassa OR74A_rev.fasta	35117.3	1	7	8	8	0.0003	0.263
mcn10112019 (2)	Uncategorized Sample	7971	GPM22200020612	Cluster of | Neurospora crassa OR74A | ribosome biogenesis-45 | protein | length=242 (NCU08951)	| Neurospora crassa OR74A | ribosome biogenesis-45 | protein | length=242	NCU08951	Neurospora crassa OR74A_rev.fasta	26834	1	5	8	8	0.0003	0.256
mcn10112019 (2)	Uncategorized Sample	7971	GPM22200020612	Cluster of | Neurospora crassa OR74A | pyruvate dehydrogenase complex | protein | length=458 (NCU07659)	| Neurospora crassa OR74A | pyruvate dehydrogenase complex | protein | length=458	NCU07659	Neurospora crassa OR74A_rev.fasta	48620	1	8	8	8	0.0003	0.255
mcn10112019 (2)	Uncategorized Sample	7971	GPM22200020612	Cluster of | Neurospora crassa OR74A | 60S ribosomal protein L18 | protein | length=183 (NCU03988)	| Neurospora crassa OR74A | 60S ribosomal protein L18 | protein | length=183	NCU03988	Neurospora crassa OR74A_rev.fasta	20602.9	1	5	8	8	0.0003	0.23
mcn10112019 (2)	Uncategorized Sample	7971	GPM22200020612	Cluster of | Neurospora crassa OR74A | hypothetical protein | protein | length=361 (NCU01577)	| Neurospora crassa OR74A | hypothetical protein | protein | length=361	NCU01577	Neurospora crassa OR74A_rev.fasta	38539.4	1	7	8	8	0.0003	0.205
mcn10112019 (2)	Uncategorized Sample	7971	GPM22200020612	Cluster of | Neurospora crassa OR74A | acetate utilization-19 | protein | length=487 (NCU06783)	| Neurospora crassa OR74A | acetate utilization-19 | protein | length=487	NCU06783	Neurospora crassa OR74A_rev.fasta	52970.2	1	8	8	8	0.0003	0.195
mcn10112019 (2)	Uncategorized Sample	7971	GPM22200020612	Cluster of | Neurospora crassa OR74A | aspartyl protease-16 | protein | length=537 (NCU00122)	| Neurospora crassa OR74A | aspartyl protease-16 | protein | length=537	NCU00122	Neurospora crassa OR74A_rev.fasta	58032.7	1	8	8	8	0.0003	0.194
mcn10112019 (2)	Uncategorized Sample	7971	GPM22200020612	Cluster of | Neurospora crassa OR74A | cell division control protein 12 | protein | length=385 (NCU03795)	| Neurospora crassa OR74A | cell division control protein 12 | protein | length=385	NCU03795	Neurospora crassa OR74A_rev.fasta	44559.1	1	6	7	8	0.0003	0.19
mcn10112019 (2)	Uncategorized Sample	7971	GPM22200020612	Cluster of | Neurospora crassa OR74A | dihydrolipoyl dehydrogenase | protein | length=504 (NCU02407)	| Neurospora crassa OR74A | dihydrolipoyl dehydrogenase | protein | length=504	NCU02407	Neurospora crassa OR74A_rev.fasta	53906.8	1	8	8	8	0.0003	0.19
mcn10112019 (2)	Uncategorized Sample	7971	GPM22200020612	Cluster of | Neurospora crassa OR74A | hypothetical protein, hypothetical protein, variant 1 | protein | length=386 (NCU08185)	| Neurospora crassa OR74A | hypothetical protein, hypothetical protein, variant 1 | protein | length=386	NCU08185	Neurospora crassa OR74A_rev.fasta	46772.8	1	5	7	8	0.0003	0.187
mcn10112019 (2)	Uncategorized Sample	7971	GPM22200020612	Cluster of | Neurospora crassa OR74A | glycogenin, glycogenin, variant 1 | protein | length=576 (NCU06698)	| Neurospora crassa OR74A | glycogenin, glycogenin, variant 1 | protein | length=576	NCU06698	Neurospora crassa OR74A_rev.fasta	63782.1	1	7	8	8	0.0003	0.179
mcn10112019 (2)	Uncategorized Sample	7971	GPM22200020612	Cluster of | Neurospora crassa OR74A | isocitrate dehydrogenase subunit 2 | protein | length=379 (NCU07697)	| Neurospora crassa OR74A | isocitrate dehydrogenase subunit 2 | protein | length=379	NCU07697	Neurospora crassa OR74A_rev.fasta	40987.8	1	6	8	8	0.0003	0.169
mcn10112019 (2)	Uncategorized Sample	7971	GPM22200020612	Cluster of | Neurospora crassa OR74A | nuclear polyadenylated RNA-binding protein Nab2 | protein | length=522 (NCU16397)	| Neurospora crassa OR74A | nuclear polyadenylated RNA-binding protein Nab2 | protein | length=522	NCU16397	Neurospora crassa OR74A_rev.fasta	56186.2	1	7	7	8	0.0003	0.167
mcn10112019 (2)	Uncategorized Sample	7971	GPM22200020612	Cluster of | Neurospora crassa OR74A | hypothetical protein, hypothetical protein, variant 1 | protein | length=403 (NCU16448)	| Neurospora crassa OR74A | hypothetical protein, hypothetical protein, variant 1 | protein | length=403	NCU16448	Neurospora crassa OR74A_rev.fasta	44741.3	1	7	8	8	0.0003	0.166
mcn10112019 (2)	Uncategorized Sample	7971	GPM22200020612	Cluster of | Neurospora crassa OR74A | hypothetical protein | protein | length=377 (NCU05809)	| Neurospora crassa OR74A | hypothetical protein | protein | length=377	NCU05809	Neurospora crassa OR74A_rev.fasta	41230.6	1	5	8	8	0.0003	0.162
mcn10112019 (2)	Uncategorized Sample	7971	GPM22200020612	Cluster of | Neurospora crassa OR74A | ATP-dependent RNA helicase dbp-2 | protein | length=562 (NCU07839)	| Neurospora crassa OR74A | ATP-dependent RNA helicase dbp-2 | protein | length=562	NCU07839	Neurospora crassa OR74A_rev.fasta	60200.7	1	7	7	8	0.0003	0.151
mcn10112019 (2)	Uncategorized Sample	7971	GPM22200020612	Cluster of | Neurospora crassa OR74A | F-box domain-containing protein | protein | length=627 (NCU06932)	| Neurospora crassa OR74A | F-box domain-containing protein | protein | length=627	NCU06932	Neurospora crassa OR74A_rev.fasta	71161.7	1	8	8	8	0.0003	0.15
mcn10112019 (2)	Uncategorized Sample	7971	GPM22200020612	Cluster of | Neurospora crassa OR74A | 60S ribosomal protein L3 | protein | length=439 (NCU08299)	| Neurospora crassa OR74A | 60S ribosomal protein L3 | protein | length=439	NCU08299	Neurospora crassa OR74A_rev.fasta	48047.9	1	5	8	8	0.0003	0.123
mcn10112019 (2)	Uncategorized Sample	7971	GPM22200020612	Cluster of | Neurospora crassa OR74A | eukaryotic peptide chain release factor GTP-binding subunit, eukaryotic peptide chain release factor GTP-binding subunit, variant 1 | protein | length=730 (NCU04790)	| Neurospora crassa OR74A | eukaryotic peptide chain release factor GTP-binding subunit, eukaryotic peptide chain release factor GTP-binding subunit, variant 1 | protein | length=730	NCU04790	Neurospora crassa OR74A_rev.fasta	79423.9	1	6	8	8	0.0003	0.121
mcn10112019 (2)	Uncategorized Sample	7971	GPM22200020612	Cluster of | Neurospora crassa OR74A | cell division control protein Cdc48, cell division control protein Cdc48, variant 1 | protein | length=824 (NCU00018)	| Neurospora crassa OR74A | cell division control protein Cdc48, cell division control protein Cdc48, variant 1 | protein | length=824	NCU00018	Neurospora crassa OR74A_rev.fasta	90573.6	1	7	7	8	0.0003	0.104
mcn10112019 (2)	Uncategorized Sample	7971	GPM22200020612	Cluster of | Neurospora crassa OR74A | hypothetical protein | protein | length=1112 (NCU09898)	| Neurospora crassa OR74A | hypothetical protein | protein | length=1112	NCU09898	Neurospora crassa OR74A_rev.fasta	118099	1	8	8	8	0.0003	0.0701
mcn10112019 (2)	Uncategorized Sample	7971	GPM22200020612	Cluster of | Neurospora crassa OR74A | 40S ribosomal protein S19 | protein | length=149 (NCU07826)	| Neurospora crassa OR74A | 40S ribosomal protein S19 | protein | length=149	NCU07826	Neurospora crassa OR74A_rev.fasta	16669.3	1	6	7	7	0.0003	0.396
mcn10112019 (2)	Uncategorized Sample	7971	GPM22200020612	Cluster of | Neurospora crassa OR74A | 60S ribosomal protein L15 | protein | length=203 (NCU01776)	| Neurospora crassa OR74A | 60S ribosomal protein L15 | protein | length=203	NCU01776	Neurospora crassa OR74A_rev.fasta	24190.6	1	6	7	7	0.0003	0.335
mcn10112019 (2)	Uncategorized Sample	7971	GPM22200020612	Cluster of | Neurospora crassa OR74A | 40S ribosomal protein S13 | protein | length=151 (NCU03038)	| Neurospora crassa OR74A | 40S ribosomal protein S13 | protein | length=151	NCU03038	Neurospora crassa OR74A_rev.fasta	16873.6	1	4	6	7	0.0003	0.298
mcn10112019 (2)	Uncategorized Sample	7971	GPM22200020612	Cluster of | Neurospora crassa OR74A | 60S ribosomal protein L17 | protein | length=186 (NCU03703)	| Neurospora crassa OR74A | 60S ribosomal protein L17 | protein | length=186	NCU03703	Neurospora crassa OR74A_rev.fasta	20763.9	1	5	6	7	0.0003	0.258
mcn10112019 (2)	Uncategorized Sample	7971	GPM22200020612	Cluster of | Neurospora crassa OR74A | zinc finger transcription factor-16 | protein | length=304 (NCU00723)	| Neurospora crassa OR74A | zinc finger transcription factor-16 | protein | length=304	NCU00723	Neurospora crassa OR74A_rev.fasta	34536.3	1	7	7	7	0.0003	0.257
mcn10112019 (2)	Uncategorized Sample	7971	GPM22200020612	Cluster of | Neurospora crassa OR74A | hypothetical protein | protein | length=410 (NCU07775)	| Neurospora crassa OR74A | hypothetical protein | protein | length=410	NCU07775	Neurospora crassa OR74A_rev.fasta	43223.4	1	7	7	7	0.0003	0.246
mcn10112019 (2)	Uncategorized Sample	7971	GPM22200020612	Cluster of | Neurospora crassa OR74A | RNase III domain-containing protein | protein | length=267 (NCU09826)	| Neurospora crassa OR74A | RNase III domain-containing protein | protein | length=267	NCU09826	Neurospora crassa OR74A_rev.fasta	29586.9	1	5	7	7	0.0003	0.243
mcn10112019 (2)	Uncategorized Sample	7971	GPM22200020612	Cluster of | Neurospora crassa OR74A | hypothetical protein | protein | length=419 (NCU03858)	| Neurospora crassa OR74A | hypothetical protein | protein | length=419	NCU03858	Neurospora crassa OR74A_rev.fasta	45835.8	1	7	7	7	0.0003	0.215
mcn10112019 (2)	Uncategorized Sample	7971	GPM22200020612	Cluster of | Neurospora crassa OR74A | hypothetical protein | protein | length=458 (NCU07112)	| Neurospora crassa OR74A | hypothetical protein | protein | length=458	NCU07112	Neurospora crassa OR74A_rev.fasta	49035.8	1	6	7	7	0.0003	0.214
mcn10112019 (2)	Uncategorized Sample	7971	GPM22200020612	Cluster of | Neurospora crassa OR74A | Homocitrate synthase, homocitrate synthase, variant 1, homocitrate synthase, variant 2 | protein | length=425 (NCU05526)	| Neurospora crassa OR74A | Homocitrate synthase, homocitrate synthase, variant 1, homocitrate synthase, variant 2 | protein | length=425	NCU05526	Neurospora crassa OR74A_rev.fasta	46325.9	1	7	7	7	0.0003	0.212
mcn10112019 (2)	Uncategorized Sample	7971	GPM22200020612	Cluster of | Neurospora crassa OR74A | hypothetical protein, hypothetical protein, variant 1 | protein | length=287 (NCU08550)	| Neurospora crassa OR74A | hypothetical protein, hypothetical protein, variant 1 | protein | length=287	NCU08550	Neurospora crassa OR74A_rev.fasta	31723.9	1	6	6	7	0.0003	0.199
mcn10112019 (2)	Uncategorized Sample	7971	GPM22200020612	Cluster of | Neurospora crassa OR74A | TATA-binding protein | protein | length=257 (NCU04770)	| Neurospora crassa OR74A | TATA-binding protein | protein | length=257	NCU04770	Neurospora crassa OR74A_rev.fasta	27580	1	4	6	7	0.0003	0.183
mcn10112019 (2)	Uncategorized Sample	7971	GPM22200020612	Cluster of | Neurospora crassa OR74A | hypothetical protein | protein | length=443 (NCU05552)	| Neurospora crassa OR74A | hypothetical protein | protein | length=443	NCU05552	Neurospora crassa OR74A_rev.fasta	49676	1	6	7	7	0.0003	0.16
mcn10112019 (2)	Uncategorized Sample	7971	GPM22200020612	Cluster of | Neurospora crassa OR74A | hypothetical protein | protein | length=396 (NCU01485)	| Neurospora crassa OR74A | hypothetical protein | protein | length=396	NCU01485	Neurospora crassa OR74A_rev.fasta	45381.5	1	6	7	7	0.0003	0.152
mcn10112019 (2)	Uncategorized Sample	7971	GPM22200020612	Cluster of | Neurospora crassa OR74A | Serine hydroxymethyltransferase | protein | length=480 (NCU02274)	| Neurospora crassa OR74A | Serine hydroxymethyltransferase | protein | length=480	NCU02274	Neurospora crassa OR74A_rev.fasta	52978.4	1	6	6	7	0.0003	0.152
mcn10112019 (2)	Uncategorized Sample	7971	GPM22200020612	Cluster of | Neurospora crassa OR74A | transcription initiation factor-9 | protein | length=563 (NCU03095)	| Neurospora crassa OR74A | transcription initiation factor-9 | protein | length=563	NCU03095	Neurospora crassa OR74A_rev.fasta	60705.4	1	6	7	7	0.0003	0.131
mcn10112019 (2)	Uncategorized Sample	7971	GPM22200020612	Cluster of | Neurospora crassa OR74A | differentiation regulator | protein | length=798 (NCU06459)	| Neurospora crassa OR74A | differentiation regulator | protein | length=798	NCU06459	Neurospora crassa OR74A_rev.fasta	85768.9	1	6	7	7	0.0003	0.12
mcn10112019 (2)	Uncategorized Sample	7971	GPM22200020612	Cluster of | Neurospora crassa OR74A | WASP-like protein las17p | protein | length=636 (NCU07438)	| Neurospora crassa OR74A | WASP-like protein las17p | protein | length=636	NCU07438	Neurospora crassa OR74A_rev.fasta	66203.3	1	6	7	7	0.0003	0.112
mcn10112019 (2)	Uncategorized Sample	7971	GPM22200020612	Cluster of | Neurospora crassa OR74A | eukaryotic translation initiation factor 3 | protein | length=747 (NCU02208)	| Neurospora crassa OR74A | eukaryotic translation initiation factor 3 | protein | length=747	NCU02208	Neurospora crassa OR74A_rev.fasta	85566.7	1	7	7	7	0.0003	0.107
mcn10112019 (2)	Uncategorized Sample	7971	GPM22200020612	Cluster of | Neurospora crassa OR74A | eukaryotic translation initiation factor 3 | protein | length=872 (NCU07831)	| Neurospora crassa OR74A | eukaryotic translation initiation factor 3 | protein | length=872	NCU07831	Neurospora crassa OR74A_rev.fasta	98402	1	7	7	7	0.0003	0.0791
mcn10112019 (2)	Uncategorized Sample	7971	GPM22200020612	Cluster of | Neurospora crassa OR74A | cell wall biogenesis protein phosphatase Ssd1 | protein | length=1365 (NCU01197)	| Neurospora crassa OR74A | cell wall biogenesis protein phosphatase Ssd1 | protein | length=1365	NCU01197	Neurospora crassa OR74A_rev.fasta	149137	1	7	7	7	0.0003	0.0593
mcn10112019 (2)	Uncategorized Sample	7971	GPM22200020612	Cluster of | Neurospora crassa OR74A | ribosomal protein CRP7, ribosomal protein CRP7, variant 1 | protein | length=87 (NCU08627)	| Neurospora crassa OR74A | ribosomal protein CRP7, ribosomal protein CRP7, variant 1 | protein | length=87	NCU08627	Neurospora crassa OR74A_rev.fasta	9661.2	1	4	6	6	0.0003	0.448
mcn10112019 (2)	Uncategorized Sample	7971	GPM22200020612	Cluster of | Neurospora crassa OR74A | 40S ribosomal protein S22, 40S ribosomal protein S22, variant 1 | protein | length=130 (NCU06431)	| Neurospora crassa OR74A | 40S ribosomal protein S22, 40S ribosomal protein S22, variant 1 | protein | length=130	NCU06431	Neurospora crassa OR74A_rev.fasta	14820.5	1	4	6	6	0.0003	0.362
mcn10112019 (2)	Uncategorized Sample	7971	GPM22200020612	Cluster of | Neurospora crassa OR74A | Ribosomal protein L26 | protein | length=136 (NCU03565)	| Neurospora crassa OR74A | Ribosomal protein L26 | protein | length=136	NCU03565	Neurospora crassa OR74A_rev.fasta	15331	1	5	6	6	0.0003	0.301
mcn10112019 (2)	Uncategorized Sample	7971	GPM22200020612	Cluster of | Neurospora crassa OR74A | ADP-ribosylation factor 1, ADP-ribosylation factor 1, variant 1 | protein | length=185 (NCU08340)	| Neurospora crassa OR74A | ADP-ribosylation factor 1, ADP-ribosylation factor 1, variant 1 | protein | length=185	NCU08340	Neurospora crassa OR74A_rev.fasta	20980	1	4	6	6	0.0003	0.259
mcn10112019 (2)	Uncategorized Sample	7971	GPM22200020612	Cluster of | Neurospora crassa OR74A | serine/threonine-protein phosphatase PP1 | protein | length=308 (NCU00043)	| Neurospora crassa OR74A | serine/threonine-protein phosphatase PP1 | protein | length=308	NCU00043	Neurospora crassa OR74A_rev.fasta	35569.8	1	6	6	6	0.0003	0.253
mcn10112019 (2)	Uncategorized Sample	7971	GPM22200020612	Cluster of | Neurospora crassa OR74A | nucleosome assembly protein | protein | length=407 (NCU01438)	| Neurospora crassa OR74A | nucleosome assembly protein | protein | length=407	NCU01438	Neurospora crassa OR74A_rev.fasta	46309.9	1	5	6	6	0.0003	0.214
mcn10112019 (2)	Uncategorized Sample	7971	GPM22200020612	Cluster of | Neurospora crassa OR74A | eukaryotic translation initiation factor 3 subunit 2 | protein | length=346 (NCU03876)	| Neurospora crassa OR74A | eukaryotic translation initiation factor 3 subunit 2 | protein | length=346	NCU03876	Neurospora crassa OR74A_rev.fasta	38797.7	1	6	6	6	0.0003	0.205
mcn10112019 (2)	Uncategorized Sample	7971	GPM22200020612	Cluster of | Neurospora crassa OR74A | vacuolar protease A | protein | length=396 (NCU02273)	| Neurospora crassa OR74A | vacuolar protease A | protein | length=396	NCU02273	Neurospora crassa OR74A_rev.fasta	42934.1	1	6	6	6	0.0003	0.174
mcn10112019 (2)	Uncategorized Sample	7971	GPM22200020612	Cluster of | Neurospora crassa OR74A | Fructose-bisphosphate aldolase, fructose-bisphosphate aldolase, variant 1 | protein | length=362 (NCU07807)	| Neurospora crassa OR74A | Fructose-bisphosphate aldolase, fructose-bisphosphate aldolase, variant 1 | protein | length=362	NCU07807	Neurospora crassa OR74A_rev.fasta	39890.1	1	6	6	6	0.0003	0.171
mcn10112019 (2)	Uncategorized Sample	7971	GPM22200020612	Cluster of | Neurospora crassa OR74A | 26S protease regulatory subunit 4 | protein | length=459 (NCU01224)	| Neurospora crassa OR74A | 26S protease regulatory subunit 4 | protein | length=459	NCU01224	Neurospora crassa OR74A_rev.fasta	50972	1	6	6	6	0.0003	0.15
mcn10112019 (2)	Uncategorized Sample	7971	GPM22200020612	Cluster of | Neurospora crassa OR74A | 26S protease regulatory subunit 6B | protein | length=421 (NCU02260)	| Neurospora crassa OR74A | 26S protease regulatory subunit 6B | protein | length=421	NCU02260	Neurospora crassa OR74A_rev.fasta	46933.1	1	4	5	6	0.0003	0.147
mcn10112019 (2)	Uncategorized Sample	7971	GPM22200020612	Cluster of | Neurospora crassa OR74A | Grp1p | protein | length=354 (NCU07735)	| Neurospora crassa OR74A | Grp1p | protein | length=354	NCU07735	Neurospora crassa OR74A_rev.fasta	37861.7	1	5	6	6	0.0003	0.136
mcn10112019 (2)	Uncategorized Sample	7971	GPM22200020612	Cluster of | Neurospora crassa OR74A | serine/threonine-protein kinase prk1, serine/threonine-protein kinase prk1, variant 1 | protein | length=544 (NCU07172)	| Neurospora crassa OR74A | serine/threonine-protein kinase prk1, serine/threonine-protein kinase prk1, variant 1 | protein | length=544	NCU07172	Neurospora crassa OR74A_rev.fasta	58862.1	1	5	6	6	0.0003	0.136
mcn10112019 (2)	Uncategorized Sample	7971	GPM22200020612	Cluster of | Neurospora crassa OR74A | pyruvate dehydrogenase E1 component alpha subunit | protein | length=417 (NCU06482)	| Neurospora crassa OR74A | pyruvate dehydrogenase E1 component alpha subunit | protein | length=417	NCU06482	Neurospora crassa OR74A_rev.fasta	46140	1	6	6	6	0.0003	0.134
mcn10112019 (2)	Uncategorized Sample	7971	GPM22200020612	Cluster of | Neurospora crassa OR74A | helicase-4 | protein | length=434 (NCU09076)	| Neurospora crassa OR74A | helicase-4 | protein | length=434	NCU09076	Neurospora crassa OR74A_rev.fasta	49152.3	1	6	6	6	0.0003	0.124
mcn10112019 (2)	Uncategorized Sample	7971	GPM22200020612	Cluster of | Neurospora crassa OR74A | pentose glucuronate interconversion-2 | protein | length=521 (NCU02797)	| Neurospora crassa OR74A | pentose glucuronate interconversion-2 | protein | length=521	NCU02797	Neurospora crassa OR74A_rev.fasta	58192.5	1	5	5	6	0.0003	0.117
mcn10112019 (2)	Uncategorized Sample	7971	GPM22200020612	Cluster of | Neurospora crassa OR74A | 6-phosphogluconate dehydrogenase | protein | length=492 (NCU03100)	| Neurospora crassa OR74A | 6-phosphogluconate dehydrogenase | protein | length=492	NCU03100	Neurospora crassa OR74A_rev.fasta	54227.2	1	4	6	6	0.0003	0.11
mcn10112019 (2)	Uncategorized Sample	7971	GPM22200020612	Cluster of | Neurospora crassa OR74A | transketolase | protein | length=686 (NCU01328)	| Neurospora crassa OR74A | transketolase | protein | length=686	NCU01328	Neurospora crassa OR74A_rev.fasta	75160.1	1	6	6	6	0.0003	0.108
mcn10112019 (2)	Uncategorized Sample	7971	GPM22200020612	Cluster of | Neurospora crassa OR74A | 60S ribosomal protein L44 | protein | length=106 (NCU00706)	| Neurospora crassa OR74A | 60S ribosomal protein L44 | protein | length=106	NCU00706	Neurospora crassa OR74A_rev.fasta	11912.2	1	2	6	6	0.0003	0.104
mcn10112019 (2)	Uncategorized Sample	7971	GPM22200020612	Cluster of | Neurospora crassa OR74A | WD repeat protein | protein | length=592 (NCU06039)	| Neurospora crassa OR74A | WD repeat protein | protein | length=592	NCU06039	Neurospora crassa OR74A_rev.fasta	64024.8	1	5	6	6	0.0003	0.0963
mcn10112019 (2)	Uncategorized Sample	7971	GPM22200020612	Cluster of | Neurospora crassa OR74A | mitogen-activated protein kinase MKC1 | protein | length=413 (NCU09842)	| Neurospora crassa OR74A | mitogen-activated protein kinase MKC1 | protein | length=413	NCU09842	Neurospora crassa OR74A_rev.fasta	46774.4	1	4	5	6	0.0003	0.092
mcn10112019 (2)	Uncategorized Sample	7971	GPM22200020612	Cluster of | Neurospora crassa OR74A | chromatin remodeling complex subunit | protein | length=751 (NCU08840)	| Neurospora crassa OR74A | chromatin remodeling complex subunit | protein | length=751	NCU08840	Neurospora crassa OR74A_rev.fasta	81510.7	1	6	6	6	0.0003	0.0732
mcn10112019 (2)	Uncategorized Sample	7971	GPM22200020612	Cluster of | Neurospora crassa OR74A | zinc knuckle domain-containing protein | protein | length=673 (NCU06718)	| Neurospora crassa OR74A | zinc knuckle domain-containing protein | protein | length=673	NCU06718	Neurospora crassa OR74A_rev.fasta	72615.1	1	4	6	6	0.0003	0.0698
mcn10112019 (2)	Uncategorized Sample	7971	GPM22200020612	Cluster of | Neurospora crassa OR74A | zinc finger transcription factor-35 | protein | length=1024 (NCU02853)	| Neurospora crassa OR74A | zinc finger transcription factor-35 | protein | length=1024	NCU02853	Neurospora crassa OR74A_rev.fasta	119179	1	5	6	6	0.0003	0.0684
mcn10112019 (2)	Uncategorized Sample	7971	GPM22200020612	Cluster of | Neurospora crassa OR74A | DNA-directed RNA polymerase III polypeptide | protein | length=1155 (NCU01772)	| Neurospora crassa OR74A | DNA-directed RNA polymerase III polypeptide | protein | length=1155	NCU01772	Neurospora crassa OR74A_rev.fasta	129460	1	6	6	6	0.0003	0.0589
mcn10112019 (2)	Uncategorized Sample	7971	GPM22200020612	Cluster of | Neurospora crassa OR74A | DNA-dependent RNA polymerase II RPB140 | protein | length=1287 (NCU05120)	| Neurospora crassa OR74A | DNA-dependent RNA polymerase II RPB140 | protein | length=1287	NCU05120	Neurospora crassa OR74A_rev.fasta	145408	1	6	6	6	0.0003	0.0521
mcn10112019 (2)	Uncategorized Sample	7971	GPM22200020612	Cluster of | Neurospora crassa OR74A | hypothetical protein | protein | length=1388 (NCU08417)	| Neurospora crassa OR74A | hypothetical protein | protein | length=1388	NCU08417	Neurospora crassa OR74A_rev.fasta	152770	1	5	6	6	0.0003	0.0432
mcn10112019 (2)	Uncategorized Sample	7971	GPM22200020612	Cluster of | Neurospora crassa OR74A | DNA topoisomerase 2, DNA topoisomerase 2, variant 1 | protein | length=1923 (NCU06338)	| Neurospora crassa OR74A | DNA topoisomerase 2, DNA topoisomerase 2, variant 1 | protein | length=1923	NCU06338	Neurospora crassa OR74A_rev.fasta	213153	1	5	6	6	0.0003	0.0322
mcn10112019 (2)	Uncategorized Sample	7971	GPM22200020612	Cluster of | Neurospora crassa OR74A | hypothetical protein | protein | length=2219 (NCU04512)	| Neurospora crassa OR74A | hypothetical protein | protein | length=2219	NCU04512	Neurospora crassa OR74A_rev.fasta	249930	1	6	6	6	0.0003	0.0284
mcn10112019 (2)	Uncategorized Sample	7971	GPM22200020612	Cluster of | Neurospora crassa OR74A | 60S ribosomal protein L25 | protein | length=156 (NCU06226)	| Neurospora crassa OR74A | 60S ribosomal protein L25 | protein | length=156	NCU06226	Neurospora crassa OR74A_rev.fasta	17119.9	1	5	5	5	0.0002	0.353
mcn10112019 (2)	Uncategorized Sample	7971	GPM22200020612	Cluster of | Neurospora crassa OR74A | ribosomal protein Srp1 | protein | length=160 (NCU01948)	| Neurospora crassa OR74A | ribosomal protein Srp1 | protein | length=160	NCU01948	Neurospora crassa OR74A_rev.fasta	18214.6	1	5	5	5	0.0002	0.35
mcn10112019 (2)	Uncategorized Sample	7971	GPM22200020612	Cluster of | Neurospora crassa OR74A | Ribosomal protein L14 | protein | length=142 (NCU00634)	| Neurospora crassa OR74A | Ribosomal protein L14 | protein | length=142	NCU00634	Neurospora crassa OR74A_rev.fasta	15854.1	1	5	5	5	0.0002	0.345
mcn10112019 (2)	Uncategorized Sample	7971	GPM22200020612	Cluster of | Neurospora crassa OR74A | 60S ribosomal protein L22 | protein | length=126 (NCU06661)	| Neurospora crassa OR74A | 60S ribosomal protein L22 | protein | length=126	NCU06661	Neurospora crassa OR74A_rev.fasta	14209.9	1	4	5	5	0.0002	0.341
mcn10112019 (2)	Uncategorized Sample	7971	GPM22200020612	Cluster of | Neurospora crassa OR74A | 40S ribosomal protein S8, 40S ribosomal protein S8, variant 1 | protein | length=202 (NCU08500)	| Neurospora crassa OR74A | 40S ribosomal protein S8, 40S ribosomal protein S8, variant 1 | protein | length=202	NCU08500	Neurospora crassa OR74A_rev.fasta	23011.2	1	5	5	5	0.0002	0.322
mcn10112019 (2)	Uncategorized Sample	7971	GPM22200020612	Cluster of | Neurospora crassa OR74A | Histone H3 | protein | length=155 (NCU00145)	| Neurospora crassa OR74A | Histone H3 | protein | length=155	NCU00145	Neurospora crassa OR74A_rev.fasta	17337.7	1	3	3	5	0.0002	0.29
mcn10112019 (2)	Uncategorized Sample	7971	GPM22200020612	Cluster of | Neurospora crassa OR74A | peptidyl-prolyl cis-trans isomerase | protein | length=223 (NCU00726)	| Neurospora crassa OR74A | peptidyl-prolyl cis-trans isomerase | protein | length=223	NCU00726	Neurospora crassa OR74A_rev.fasta	24064.6	1	5	5	5	0.0002	0.256
mcn10112019 (2)	Uncategorized Sample	7971	GPM22200020612	Cluster of | Neurospora crassa OR74A | histone H2A.Z, histone H2A.Z, variant 1, histone H2A.Z, variant 2 | protein | length=143 (NCU05347)	| Neurospora crassa OR74A | histone H2A.Z, histone H2A.Z, variant 1, histone H2A.Z, variant 2 | protein | length=143	NCU05347	Neurospora crassa OR74A_rev.fasta	15288.2	1	3	4	5	0.0002	0.231
mcn10112019 (2)	Uncategorized Sample	7971	GPM22200020612	Cluster of | Neurospora crassa OR74A | 60S ribosomal protein L37, 60S ribosomal protein L37, variant 1 | protein | length=92 (NCU01966)	| Neurospora crassa OR74A | 60S ribosomal protein L37, 60S ribosomal protein L37, variant 1 | protein | length=92	NCU01966	Neurospora crassa OR74A_rev.fasta	10233	1	3	4	5	0.0002	0.228
mcn10112019 (2)	Uncategorized Sample	7971	GPM22200020612	Cluster of | Neurospora crassa OR74A | 60S ribosomal protein L6 | protein | length=202 (NCU02707)	| Neurospora crassa OR74A | 60S ribosomal protein L6 | protein | length=202	NCU02707	Neurospora crassa OR74A_rev.fasta	22475.8	1	5	5	5	0.0002	0.213
mcn10112019 (2)	Uncategorized Sample	7971	GPM22200020612	Cluster of | Neurospora crassa OR74A | 26S proteasome regulatory subunit rpn-8 | protein | length=352 (NCU01547)	| Neurospora crassa OR74A | 26S proteasome regulatory subunit rpn-8 | protein | length=352	NCU01547	Neurospora crassa OR74A_rev.fasta	39104.6	1	5	5	5	0.0002	0.205
mcn10112019 (2)	Uncategorized Sample	7971	GPM22200020612	Cluster of | Neurospora crassa OR74A | ribosomal protein S28, ribosomal protein S28, variant 1 | protein | length=145 (NCU01552)	| Neurospora crassa OR74A | ribosomal protein S28, ribosomal protein S28, variant 1 | protein | length=145	NCU01552	Neurospora crassa OR74A_rev.fasta	15909.9	1	3	5	5	0.0002	0.2
mcn10112019 (2)	Uncategorized Sample	7971	GPM22200020612	Cluster of | Neurospora crassa OR74A | DUF500 and SH3 domain-containing protein | protein | length=413 (NCU03888)	| Neurospora crassa OR74A | DUF500 and SH3 domain-containing protein | protein | length=413	NCU03888	Neurospora crassa OR74A_rev.fasta	43056.5	1	5	5	5	0.0002	0.186
mcn10112019 (2)	Uncategorized Sample	7971	GPM22200020612	Cluster of | Neurospora crassa OR74A | heat shock protein 30-2 | protein | length=279 (NCU07232)	| Neurospora crassa OR74A | heat shock protein 30-2 | protein | length=279	NCU07232	Neurospora crassa OR74A_rev.fasta	30981.4	1	4	5	5	0.0002	0.183
mcn10112019 (2)	Uncategorized Sample	7971	GPM22200020612	Cluster of | Neurospora crassa OR74A | 40S ribosomal protein S7 | protein | length=202 (NCU00258)	| Neurospora crassa OR74A | 40S ribosomal protein S7 | protein | length=202	NCU00258	Neurospora crassa OR74A_rev.fasta	22873	1	4	5	5	0.0002	0.178
mcn10112019 (2)	Uncategorized Sample	7971	GPM22200020612	Cluster of | Neurospora crassa OR74A | hydroxymethylglutathione dehydrogenase-2 | protein | length=380 (NCU06652)	| Neurospora crassa OR74A | hydroxymethylglutathione dehydrogenase-2 | protein | length=380	NCU06652	Neurospora crassa OR74A_rev.fasta	40096.9	1	4	5	5	0.0002	0.158
mcn10112019 (2)	Uncategorized Sample	7971	GPM22200020612	Cluster of | Neurospora crassa OR74A | GTP-binding nuclear protein GSP1/Ran, GTP-binding nuclear protein GSP1/Ran, variant 1 | protein | length=215 (NCU09269)	| Neurospora crassa OR74A | GTP-binding nuclear protein GSP1/Ran, GTP-binding nuclear protein GSP1/Ran, variant 1 | protein | length=215	NCU09269	Neurospora crassa OR74A_rev.fasta	24276.2	1	4	4	5	0.0002	0.153
mcn10112019 (2)	Uncategorized Sample	7971	GPM22200020612	Cluster of | Neurospora crassa OR74A | hypothetical protein | protein | length=444 (NCU00753)	| Neurospora crassa OR74A | hypothetical protein | protein | length=444	NCU00753	Neurospora crassa OR74A_rev.fasta	48282.8	1	5	5	5	0.0002	0.151
mcn10112019 (2)	Uncategorized Sample	7971	GPM22200020612	Cluster of | Neurospora crassa OR74A | yippee zinc-binding protein, yippee zinc-binding protein, variant 1 | protein | length=227 (NCU00024)	| Neurospora crassa OR74A | yippee zinc-binding protein, yippee zinc-binding protein, variant 1 | protein | length=227	NCU00024	Neurospora crassa OR74A_rev.fasta	25414.9	1	2	5	5	0.0002	0.132
mcn10112019 (2)	Uncategorized Sample	7971	GPM22200020612	Cluster of | Neurospora crassa OR74A | 26S protease regulatory subunit 7 | protein | length=439 (NCU02840)	| Neurospora crassa OR74A | 26S protease regulatory subunit 7 | protein | length=439	NCU02840	Neurospora crassa OR74A_rev.fasta	48917.3	1	5	5	5	0.0002	0.13
mcn10112019 (2)	Uncategorized Sample	7971	GPM22200020612	Cluster of | Neurospora crassa OR74A | tricarboxylic acid-5 protein, tricarboxylic acid-5 protein, variant 1, tricarboxylic acid-5 protein, variant 2 | protein | length=462 (NCU03857)	| Neurospora crassa OR74A | tricarboxylic acid-5 protein, tricarboxylic acid-5 protein, variant 1, tricarboxylic acid-5 protein, variant 2 | protein | length=462	NCU03857	Neurospora crassa OR74A_rev.fasta	51850.3	1	5	5	5	0.0002	0.128
mcn10112019 (2)	Uncategorized Sample	7971	GPM22200020612	Cluster of | Neurospora crassa OR74A | Argininosuccinate synthase, argininosuccinate synthase, variant 1 | protein | length=417 (NCU02639)	| Neurospora crassa OR74A | Argininosuccinate synthase, argininosuccinate synthase, variant 1 | protein | length=417	NCU02639	Neurospora crassa OR74A_rev.fasta	46922.1	1	5	5	5	0.0002	0.127
mcn10112019 (2)	Uncategorized Sample	7971	GPM22200020612	Cluster of | Neurospora crassa OR74A | ATP synthase beta subunit | protein | length=519 (NCU05430)	| Neurospora crassa OR74A | ATP synthase beta subunit | protein | length=519	NCU05430	Neurospora crassa OR74A_rev.fasta	55534.4	1	5	5	5	0.0002	0.127
mcn10112019 (2)	Uncategorized Sample	7971	GPM22200020612	Cluster of | Neurospora crassa OR74A | replication protein A-2 | protein | length=284 (NCU07717)	| Neurospora crassa OR74A | replication protein A-2 | protein | length=284	NCU07717	Neurospora crassa OR74A_rev.fasta	29430.4	1	4	5	5	0.0002	0.113
mcn10112019 (2)	Uncategorized Sample	7971	GPM22200020612	Cluster of | Neurospora crassa OR74A | Phosphoglycerate kinase | protein | length=418 (NCU07914)	| Neurospora crassa OR74A | Phosphoglycerate kinase | protein | length=418	NCU07914	Neurospora crassa OR74A_rev.fasta	45058.2	1	5	5	5	0.0002	0.112
mcn10112019 (2)	Uncategorized Sample	7971	GPM22200020612	Cluster of | Neurospora crassa OR74A | splicing factor u2af large subunit | protein | length=584 (NCU03039)	| Neurospora crassa OR74A | splicing factor u2af large subunit | protein | length=584	NCU03039	Neurospora crassa OR74A_rev.fasta	64819.3	1	4	5	5	0.0002	0.108
mcn10112019 (2)	Uncategorized Sample	7971	GPM22200020612	Cluster of | Neurospora crassa OR74A | proteasome regulatory particle | protein | length=492 (NCU03972)	| Neurospora crassa OR74A | proteasome regulatory particle | protein | length=492	NCU03972	Neurospora crassa OR74A_rev.fasta	54356	1	5	5	5	0.0002	0.106
mcn10112019 (2)	Uncategorized Sample	7971	GPM22200020612	Cluster of | Neurospora crassa OR74A | Ccr4-NOT transcription complex-3 | protein | length=572 (NCU09001)	| Neurospora crassa OR74A | Ccr4-NOT transcription complex-3 | protein | length=572	NCU09001	Neurospora crassa OR74A_rev.fasta	61246.7	1	4	5	5	0.0002	0.105
mcn10112019 (2)	Uncategorized Sample	7971	GPM22200020612	Cluster of | Neurospora crassa OR74A | hypothetical protein, hypothetical protein, variant 1 | protein | length=326 (NCU16541)	| Neurospora crassa OR74A | hypothetical protein, hypothetical protein, variant 1 | protein | length=326	NCU16541	Neurospora crassa OR74A_rev.fasta	34034.2	1	5	5	5	0.0002	0.089
mcn10112019 (2)	Uncategorized Sample	7971	GPM22200020612	Cluster of | Neurospora crassa OR74A | eukaryotic translation initiation factor 3 110 kDa subunit | protein | length=1059 (NCU00040)	| Neurospora crassa OR74A | eukaryotic translation initiation factor 3 110 kDa subunit | protein | length=1059	NCU00040	Neurospora crassa OR74A_rev.fasta	120247	1	5	5	5	0.0002	0.067
mcn10112019 (2)	Uncategorized Sample	7971	GPM22200020612	Cluster of | Neurospora crassa OR74A | Arg-6 protein, Arg-6 protein, variant 1 | protein | length=871 (NCU00567)	| Neurospora crassa OR74A | Arg-6 protein, Arg-6 protein, variant 1 | protein | length=871	NCU00567	Neurospora crassa OR74A_rev.fasta	95905.2	1	5	5	5	0.0002	0.0597
mcn10112019 (2)	Uncategorized Sample	7971	GPM22200020612	Cluster of | Neurospora crassa OR74A | pre-mRNA splicing factor ATP-dependent RNA helicase PRP43 | protein | length=774 (NCU01612)	| Neurospora crassa OR74A | pre-mRNA splicing factor ATP-dependent RNA helicase PRP43 | protein | length=774	NCU01612	Neurospora crassa OR74A_rev.fasta	87803.4	1	5	5	5	0.0002	0.0556
mcn10112019 (2)	Uncategorized Sample	7971	GPM22200020612	Cluster of | Neurospora crassa OR74A | hypothetical protein | protein | length=1307 (NCU09482)	| Neurospora crassa OR74A | hypothetical protein | protein | length=1307	NCU09482	Neurospora crassa OR74A_rev.fasta	140423	1	5	5	5	0.0002	0.0482
mcn10112019 (2)	Uncategorized Sample	7971	GPM22200020612	Cluster of | Neurospora crassa OR74A | DNA-directed RNA polymerase | protein | length=1423 (NCU06308)	| Neurospora crassa OR74A | DNA-directed RNA polymerase | protein | length=1423	NCU06308	Neurospora crassa OR74A_rev.fasta	159663	1	5	5	5	0.0002	0.045
mcn10112019 (2)	Uncategorized Sample	7971	GPM22200020612	Cluster of Keratin, type II cuticular Hb4 OS=Homo sapiens GN=KRT84 PE=2 SV=2 (sp|Q9NSB2|KRT84_HUMAN)	Keratin, type II cuticular Hb4 OS=Homo sapiens GN=KRT84 PE=2 SV=2	sp|Q9NSB2|KRT84_HUMAN	Neurospora crassa OR74A_rev.fasta	64842.6	1	2	2	5	0.0002	0.04
mcn10112019 (2)	Uncategorized Sample	7971	GPM22200020612	Cluster of | Neurospora crassa OR74A | DNA-directed RNA polymerase III largest subunit | protein | length=1533 (NCU03986)	| Neurospora crassa OR74A | DNA-directed RNA polymerase III largest subunit | protein | length=1533	NCU03986	Neurospora crassa OR74A_rev.fasta	170725	1	5	5	5	0.0002	0.0372
mcn10112019 (2)	Uncategorized Sample	7971	GPM22200020612	Cluster of | Neurospora crassa OR74A | hypothetical protein | protein | length=1200 (NCU03550)	| Neurospora crassa OR74A | hypothetical protein | protein | length=1200	NCU03550	Neurospora crassa OR74A_rev.fasta	129588	1	3	4	5	0.0002	0.035
mcn10112019 (2)	Uncategorized Sample	7971	GPM22200020612	Cluster of | Neurospora crassa OR74A | DNA-directed RNA polymerase II largest subunit | protein | length=1761 (NCU02103)	| Neurospora crassa OR74A | DNA-directed RNA polymerase II largest subunit | protein | length=1761	NCU02103	Neurospora crassa OR74A_rev.fasta	193826	1	3	4	5	0.0002	0.0244
mcn10112019 (2)	Uncategorized Sample	7971	GPM22200020612	Cluster of | Neurospora crassa OR74A | hypothetical protein, hypothetical protein, variant 1 | protein | length=2505 (NCU10346)	| Neurospora crassa OR74A | hypothetical protein, hypothetical protein, variant 1 | protein | length=2505	NCU10346	Neurospora crassa OR74A_rev.fasta	277738	1	3	4	5	0.0002	0.024
mcn10112019 (2)	Uncategorized Sample	7971	GPM22200020612	Cluster of | Neurospora crassa OR74A | DUF636 domain-containing protein | protein | length=137 (NCU01424)	| Neurospora crassa OR74A | DUF636 domain-containing protein | protein | length=137	NCU01424	Neurospora crassa OR74A_rev.fasta	15064.3	1	4	4	4	0.0002	0.35
mcn10112019 (2)	Uncategorized Sample	7971	GPM22200020612	Cluster of | Neurospora crassa OR74A | 60S ribosomal protein L20 | protein | length=225 (NCU04225)	| Neurospora crassa OR74A | 60S ribosomal protein L20 | protein | length=225	NCU04225	Neurospora crassa OR74A_rev.fasta	25397.3	1	4	4	4	0.0002	0.302
mcn10112019 (2)	Uncategorized Sample	7971	GPM22200020612	Cluster of | Neurospora crassa OR74A | 60S ribosomal protein L36 | protein | length=104 (NCU03302)	| Neurospora crassa OR74A | 60S ribosomal protein L36 | protein | length=104	NCU03302	Neurospora crassa OR74A_rev.fasta	11555.9	1	3	3	4	0.0002	0.288
mcn10112019 (2)	Uncategorized Sample	7971	GPM22200020612	Cluster of | Neurospora crassa OR74A | sulfur control-3 protein, sulfur control-3 protein, variant 1 | protein | length=171 (NCU08991)	| Neurospora crassa OR74A | sulfur control-3 protein, sulfur control-3 protein, variant 1 | protein | length=171	NCU08991	Neurospora crassa OR74A_rev.fasta	19910.5	1	3	3	4	0.0002	0.275
mcn10112019 (2)	Uncategorized Sample	7971	GPM22200020612	Cluster of | Neurospora crassa OR74A | Nop10 family nucleolar RNA-binding protein | protein | length=67 (NCU08903)	| Neurospora crassa OR74A | Nop10 family nucleolar RNA-binding protein | protein | length=67	NCU08903	Neurospora crassa OR74A_rev.fasta	7691.3	1	3	4	4	0.0002	0.269
mcn10112019 (2)	Uncategorized Sample	7971	GPM22200020612	Cluster of | Neurospora crassa OR74A | DNA-directed RNA polymerase II polypeptide | protein | length=234 (NCU05305)	| Neurospora crassa OR74A | DNA-directed RNA polymerase II polypeptide | protein | length=234	NCU05305	Neurospora crassa OR74A_rev.fasta	26562.8	1	4	4	4	0.0002	0.214
mcn10112019 (2)	Uncategorized Sample	7971	GPM22200020612	Cluster of | Neurospora crassa OR74A | ATP synthase subunit 5 | protein | length=220 (NCU01606)	| Neurospora crassa OR74A | ATP synthase subunit 5 | protein | length=220	NCU01606	Neurospora crassa OR74A_rev.fasta	23047.6	1	4	4	4	0.0002	0.205
mcn10112019 (2)	Uncategorized Sample	7971	GPM22200020612	Cluster of | Neurospora crassa OR74A | 40S ribosomal protein S26E | protein | length=119 (NCU04552)	| Neurospora crassa OR74A | 40S ribosomal protein S26E | protein | length=119	NCU04552	Neurospora crassa OR74A_rev.fasta	13546.1	1	2	4	4	0.0002	0.202
mcn10112019 (2)	Uncategorized Sample	7971	GPM22200020612	Cluster of | Neurospora crassa OR74A | 60S ribosomal protein L11 | protein | length=174 (NCU02509)	| Neurospora crassa OR74A | 60S ribosomal protein L11 | protein | length=174	NCU02509	Neurospora crassa OR74A_rev.fasta	20084.6	1	3	4	4	0.0002	0.172
mcn10112019 (2)	Uncategorized Sample	7971	GPM22200020612	Cluster of | Neurospora crassa OR74A | 40S ribosomal protein S20 | protein | length=117 (NCU06892)	| Neurospora crassa OR74A | 40S ribosomal protein S20 | protein | length=117	NCU06892	Neurospora crassa OR74A_rev.fasta	13225.7	1	2	2	4	0.0002	0.171
mcn10112019 (2)	Uncategorized Sample	7971	GPM22200020612	Cluster of | Neurospora crassa OR74A | activator 1 38 kDa subunit | protein | length=352 (NCU06769)	| Neurospora crassa OR74A | activator 1 38 kDa subunit | protein | length=352	NCU06769	Neurospora crassa OR74A_rev.fasta	39922	1	4	4	4	0.0002	0.17
mcn10112019 (2)	Uncategorized Sample	7971	GPM22200020612	Cluster of | Neurospora crassa OR74A | 50S ribosomal subunit L30 | protein | length=368 (NCU07560)	| Neurospora crassa OR74A | 50S ribosomal subunit L30 | protein | length=368	NCU07560	Neurospora crassa OR74A_rev.fasta	41256.7	1	4	4	4	0.0002	0.166
mcn10112019 (2)	Uncategorized Sample	7971	GPM22200020612	Cluster of | Neurospora crassa OR74A | nuclear division-35 | protein | length=356 (NCU07071)	| Neurospora crassa OR74A | nuclear division-35 | protein | length=356	NCU07071	Neurospora crassa OR74A_rev.fasta	39555.7	1	4	4	4	0.0002	0.166
mcn10112019 (2)	Uncategorized Sample	7971	GPM22200020612	Cluster of | Neurospora crassa OR74A | hypothetical protein | protein | length=264 (NCU04135)	| Neurospora crassa OR74A | hypothetical protein | protein | length=264	NCU04135	Neurospora crassa OR74A_rev.fasta	28937.8	1	4	4	4	0.0002	0.159
mcn10112019 (2)	Uncategorized Sample	7971	GPM22200020612	Cluster of | Neurospora crassa OR74A | ATP synthase subunit gamma | protein | length=299 (NCU09119)	| Neurospora crassa OR74A | ATP synthase subunit gamma | protein | length=299	NCU09119	Neurospora crassa OR74A_rev.fasta	32285.7	1	4	4	4	0.0002	0.157
mcn10112019 (2)	Uncategorized Sample	7971	GPM22200020612	Cluster of | Neurospora crassa OR74A | nucleoside diphosphate kinase | protein | length=277 (NCU04202)	| Neurospora crassa OR74A | nucleoside diphosphate kinase | protein | length=277	NCU04202	Neurospora crassa OR74A_rev.fasta	30137.1	1	3	4	4	0.0002	0.152
mcn10112019 (2)	Uncategorized Sample	7971	GPM22200020612	Cluster of | Neurospora crassa OR74A | Allantoicase | protein | length=354 (NCU01816)	| Neurospora crassa OR74A | Allantoicase | protein | length=354	NCU01816	Neurospora crassa OR74A_rev.fasta	39073.1	1	4	4	4	0.0002	0.15
mcn10112019 (2)	Uncategorized Sample	7971	GPM22200020612	Cluster of | Neurospora crassa OR74A | 50S ribosomal protein L5 | protein | length=352 (NCU04171)	| Neurospora crassa OR74A | 50S ribosomal protein L5 | protein | length=352	NCU04171	Neurospora crassa OR74A_rev.fasta	39119.3	1	4	4	4	0.0002	0.148
mcn10112019 (2)	Uncategorized Sample	7971	GPM22200020612	Cluster of | Neurospora crassa OR74A | ADP/ATP carrier protein, ADP/ATP carrier protein, variant 1 | protein | length=313 (NCU09477)	| Neurospora crassa OR74A | ADP/ATP carrier protein, ADP/ATP carrier protein, variant 1 | protein | length=313	NCU09477	Neurospora crassa OR74A_rev.fasta	33889.8	1	4	4	4	0.0002	0.147
mcn10112019 (2)	Uncategorized Sample	7971	GPM22200020612	Cluster of | Neurospora crassa OR74A | 60S ribosomal protein L3 | protein | length=384 (NCU06749)	| Neurospora crassa OR74A | 60S ribosomal protein L3 | protein | length=384	NCU06749	Neurospora crassa OR74A_rev.fasta	41199.2	1	4	4	4	0.0002	0.146
mcn10112019 (2)	Uncategorized Sample	7971	GPM22200020612	Cluster of | Neurospora crassa OR74A | Malate dehydrogenase | protein | length=336 (NCU04899)	| Neurospora crassa OR74A | Malate dehydrogenase | protein | length=336	NCU04899	Neurospora crassa OR74A_rev.fasta	35518.3	1	4	4	4	0.0002	0.146
mcn10112019 (2)	Uncategorized Sample	7971	GPM22200020612	Cluster of | Neurospora crassa OR74A | Hsp30-like protein | protein | length=228 (NCU09364)	| Neurospora crassa OR74A | Hsp30-like protein | protein | length=228	NCU09364	Neurospora crassa OR74A_rev.fasta	25263.5	1	3	4	4	0.0002	0.145
mcn10112019 (2)	Uncategorized Sample	7971	GPM22200020612	Cluster of | Neurospora crassa OR74A | 50S ribosomal protein L30 | protein | length=161 (NCU06786)	| Neurospora crassa OR74A | 50S ribosomal protein L30 | protein | length=161	NCU06786	Neurospora crassa OR74A_rev.fasta	18159.7	1	3	4	4	0.0002	0.137
mcn10112019 (2)	Uncategorized Sample	7971	GPM22200020612	Cluster of | Neurospora crassa OR74A | mitochondrial phosphate carrier protein | protein | length=319 (NCU05390)	| Neurospora crassa OR74A | mitochondrial phosphate carrier protein | protein | length=319	NCU05390	Neurospora crassa OR74A_rev.fasta	33321.6	1	4	4	4	0.0002	0.135
mcn10112019 (2)	Uncategorized Sample	7971	GPM22200020612	Cluster of | Neurospora crassa OR74A | recombination-12 | protein | length=478 (NCU11357)	| Neurospora crassa OR74A | recombination-12 | protein | length=478	NCU11357	Neurospora crassa OR74A_rev.fasta	51301.6	1	4	4	4	0.0002	0.121
mcn10112019 (2)	Uncategorized Sample	7971	GPM22200020612	Cluster of | Neurospora crassa OR74A | hypothetical protein | protein | length=353 (NCU07568)	| Neurospora crassa OR74A | hypothetical protein | protein | length=353	NCU07568	Neurospora crassa OR74A_rev.fasta	38188.2	1	3	4	4	0.0002	0.116
mcn10112019 (2)	Uncategorized Sample	7971	GPM22200020612	Cluster of | Neurospora crassa OR74A | DNA-directed RNA polymerase I and III polypeptide | protein | length=378 (NCU02533)	| Neurospora crassa OR74A | DNA-directed RNA polymerase I and III polypeptide | protein | length=378	NCU02533	Neurospora crassa OR74A_rev.fasta	42876.1	1	4	4	4	0.0002	0.116
mcn10112019 (2)	Uncategorized Sample	7971	GPM22200020612	Cluster of | Neurospora crassa OR74A | proteasome 26S subunit | protein | length=390 (NCU07367)	| Neurospora crassa OR74A | proteasome 26S subunit | protein | length=390	NCU07367	Neurospora crassa OR74A_rev.fasta	43627.6	1	3	3	4	0.0002	0.115
mcn10112019 (2)	Uncategorized Sample	7971	GPM22200020612	Cluster of | Neurospora crassa OR74A | homoisocitrate dehydrogenase | protein | length=402 (NCU02954)	| Neurospora crassa OR74A | homoisocitrate dehydrogenase | protein | length=402	NCU02954	Neurospora crassa OR74A_rev.fasta	43219.4	1	4	4	4	0.0002	0.112
mcn10112019 (2)	Uncategorized Sample	7971	GPM22200020612	Cluster of | Neurospora crassa OR74A | hypothetical protein | protein | length=211 (NCU07529)	| Neurospora crassa OR74A | hypothetical protein | protein | length=211	NCU07529	Neurospora crassa OR74A_rev.fasta	21649.5	1	3	4	4	0.0002	0.109
mcn10112019 (2)	Uncategorized Sample	7971	GPM22200020612	Cluster of | Neurospora crassa OR74A | hypothetical protein | protein | length=536 (NCU00695)	| Neurospora crassa OR74A | hypothetical protein | protein | length=536	NCU00695	Neurospora crassa OR74A_rev.fasta	60688.2	1	4	4	4	0.0002	0.0951
mcn10112019 (2)	Uncategorized Sample	7971	GPM22200020612	Cluster of | Neurospora crassa OR74A | nucleic acid-binding protein | protein | length=344 (NCU16466)	| Neurospora crassa OR74A | nucleic acid-binding protein | protein | length=344	NCU16466	Neurospora crassa OR74A_rev.fasta	38191.9	1	3	4	4	0.0002	0.093
mcn10112019 (2)	Uncategorized Sample	7971	GPM22200020612	Cluster of | Neurospora crassa OR74A | acetate utilization-20 | protein | length=670 (NCU06785)	| Neurospora crassa OR74A | acetate utilization-20 | protein | length=670	NCU06785	Neurospora crassa OR74A_rev.fasta	72629.1	1	4	4	4	0.0002	0.0821
mcn10112019 (2)	Uncategorized Sample	7971	GPM22200020612	Cluster of | Neurospora crassa OR74A | eukaryotic translation initiation factor 2 gamma subunit | protein | length=511 (NCU02810)	| Neurospora crassa OR74A | eukaryotic translation initiation factor 2 gamma subunit | protein | length=511	NCU02810	Neurospora crassa OR74A_rev.fasta	55438.8	1	4	4	4	0.0002	0.0802
mcn10112019 (2)	Uncategorized Sample	7971	GPM22200020612	Cluster of | Neurospora crassa OR74A | Pyruvate kinase, pyruvate kinase, variant 1 | protein | length=527 (NCU06075)	| Neurospora crassa OR74A | Pyruvate kinase, pyruvate kinase, variant 1 | protein | length=527	NCU06075	Neurospora crassa OR74A_rev.fasta	57871.4	1	4	4	4	0.0002	0.0797
mcn10112019 (2)	Uncategorized Sample	7971	GPM22200020612	Cluster of | Neurospora crassa OR74A | hypothetical protein | protein | length=555 (NCU07855)	| Neurospora crassa OR74A | hypothetical protein | protein | length=555	NCU07855	Neurospora crassa OR74A_rev.fasta	60540.9	1	4	4	4	0.0002	0.0793
mcn10112019 (2)	Uncategorized Sample	7971	GPM22200020612	Cluster of | Neurospora crassa OR74A | ATP-dependent RNA helicase dhh-1 | protein | length=569 (NCU06149)	| Neurospora crassa OR74A | ATP-dependent RNA helicase dhh-1 | protein | length=569	NCU06149	Neurospora crassa OR74A_rev.fasta	63735.8	1	4	4	4	0.0002	0.0791
mcn10112019 (2)	Uncategorized Sample	7971	GPM22200020612	Cluster of | Neurospora crassa OR74A | serine protease p2 | protein | length=532 (NCU00673)	| Neurospora crassa OR74A | serine protease p2 | protein | length=532	NCU00673	Neurospora crassa OR74A_rev.fasta	56767.3	1	4	4	4	0.0002	0.0789
mcn10112019 (2)	Uncategorized Sample	7971	GPM22200020612	Cluster of | Neurospora crassa OR74A | hypothetical protein | protein | length=386 (NCU09088)	| Neurospora crassa OR74A | hypothetical protein | protein | length=386	NCU09088	Neurospora crassa OR74A_rev.fasta	43148.8	1	4	4	4	0.0002	0.0777
mcn10112019 (2)	Uncategorized Sample	7971	GPM22200020612	Cluster of | Neurospora crassa OR74A | Hyphal anastamosis-14 protein | protein | length=606 (NCU07238)	| Neurospora crassa OR74A | Hyphal anastamosis-14 protein | protein | length=606	NCU07238	Neurospora crassa OR74A_rev.fasta	65880.7	1	4	4	4	0.0002	0.0776
mcn10112019 (2)	Uncategorized Sample	7971	GPM22200020612	Cluster of | Neurospora crassa OR74A | anthranilate synthase component II, anthranilate synthase component II, variant 1 | protein | length=762 (NCU00200)	| Neurospora crassa OR74A | anthranilate synthase component II, anthranilate synthase component II, variant 1 | protein | length=762	NCU00200	Neurospora crassa OR74A_rev.fasta	82559.6	1	4	4	4	0.0002	0.0722
mcn10112019 (2)	Uncategorized Sample	7971	GPM22200020612	Cluster of | Neurospora crassa OR74A | serine/threonine-protein kinase orb6 | protein | length=598 (NCU07296)	| Neurospora crassa OR74A | serine/threonine-protein kinase orb6 | protein | length=598	NCU07296	Neurospora crassa OR74A_rev.fasta	68019.5	1	4	4	4	0.0002	0.0635
mcn10112019 (2)	Uncategorized Sample	7971	GPM22200020612	Cluster of | Neurospora crassa OR74A | coronin-6 | protein | length=606 (NCU00202)	| Neurospora crassa OR74A | coronin-6 | protein | length=606	NCU00202	Neurospora crassa OR74A_rev.fasta	66347.6	1	4	4	4	0.0002	0.0611
mcn10112019 (2)	Uncategorized Sample	7971	GPM22200020612	Cluster of | Neurospora crassa OR74A | PSP1 domain-containing protein | protein | length=897 (NCU01777)	| Neurospora crassa OR74A | PSP1 domain-containing protein | protein | length=897	NCU01777	Neurospora crassa OR74A_rev.fasta	95967.4	1	4	4	4	0.0002	0.0602
mcn10112019 (2)	Uncategorized Sample	7971	GPM22200020612	Cluster of | Neurospora crassa OR74A | hypothetical protein | protein | length=787 (NCU01565)	| Neurospora crassa OR74A | hypothetical protein | protein | length=787	NCU01565	Neurospora crassa OR74A_rev.fasta	84647.1	1	4	4	4	0.0002	0.0597
mcn10112019 (2)	Uncategorized Sample	7971	GPM22200020612	Cluster of | Neurospora crassa OR74A | chromatin remodeling complex subunit | protein | length=748 (NCU06238)	| Neurospora crassa OR74A | chromatin remodeling complex subunit | protein | length=748	NCU06238	Neurospora crassa OR74A_rev.fasta	83819.4	1	4	4	4	0.0002	0.0588
mcn10112019 (2)	Uncategorized Sample	7971	GPM22200020612	Cluster of | Neurospora crassa OR74A | mitochondrial DnaJ chaperone, mitochondrial DnaJ chaperone, variant 1 | protein | length=531 (NCU05196)	| Neurospora crassa OR74A | mitochondrial DnaJ chaperone, mitochondrial DnaJ chaperone, variant 1 | protein | length=531	NCU05196	Neurospora crassa OR74A_rev.fasta	56400.4	1	2	3	4	0.0002	0.0565
mcn10112019 (2)	Uncategorized Sample	7971	GPM22200020612	Cluster of | Neurospora crassa OR74A | protein kinase Yak1 | protein | length=938 (NCU07872)	| Neurospora crassa OR74A | protein kinase Yak1 | protein | length=938	NCU07872	Neurospora crassa OR74A_rev.fasta	105086	1	4	4	4	0.0002	0.0533
mcn10112019 (2)	Uncategorized Sample	7971	GPM22200020612	Cluster of | Neurospora crassa OR74A | hypothetical protein | protein | length=648 (NCU06838)	| Neurospora crassa OR74A | hypothetical protein | protein | length=648	NCU06838	Neurospora crassa OR74A_rev.fasta	71044.3	1	3	4	4	0.0002	0.0525
mcn10112019 (2)	Uncategorized Sample	7971	GPM22200020612	Cluster of | Neurospora crassa OR74A | Hyphal anastamosis-13 protein | protein | length=887 (NCU06265)	| Neurospora crassa OR74A | Hyphal anastamosis-13 protein | protein | length=887	NCU06265	Neurospora crassa OR74A_rev.fasta	98427.6	1	4	4	4	0.0002	0.0507
mcn10112019 (2)	Uncategorized Sample	7971	GPM22200020612	Cluster of | Neurospora crassa OR74A | chromatin remodeling complex subunit | protein | length=762 (NCU06394)	| Neurospora crassa OR74A | chromatin remodeling complex subunit | protein | length=762	NCU06394	Neurospora crassa OR74A_rev.fasta	86570.5	1	3	4	4	0.0002	0.0486
mcn10112019 (2)	Uncategorized Sample	7971	GPM22200020612	Cluster of | Neurospora crassa OR74A | alpha-mannosidase | protein | length=1089 (NCU07404)	| Neurospora crassa OR74A | alpha-mannosidase | protein | length=1089	NCU07404	Neurospora crassa OR74A_rev.fasta	124545	1	4	4	4	0.0002	0.0459
mcn10112019 (2)	Uncategorized Sample	7971	GPM22200020612	Cluster of | Neurospora crassa OR74A | hypothetical protein | protein | length=612 (NCU09736)	| Neurospora crassa OR74A | hypothetical protein | protein | length=612	NCU09736	Neurospora crassa OR74A_rev.fasta	68740.9	1	3	4	4	0.0002	0.0458
mcn10112019 (2)	Uncategorized Sample	7971	GPM22200020612	Cluster of | Neurospora crassa OR74A | hypothetical protein | protein | length=790 (NCU01019)	| Neurospora crassa OR74A | hypothetical protein | protein | length=790	NCU01019	Neurospora crassa OR74A_rev.fasta	84511.2	1	4	4	4	0.0002	0.0456
mcn10112019 (2)	Uncategorized Sample	7971	GPM22200020612	Cluster of | Neurospora crassa OR74A | protein transporter sec-24 | protein | length=950 (NCU02391)	| Neurospora crassa OR74A | protein transporter sec-24 | protein | length=950	NCU02391	Neurospora crassa OR74A_rev.fasta	103532	1	4	4	4	0.0002	0.0442
mcn10112019 (2)	Uncategorized Sample	7971	GPM22200020612	Cluster of | Neurospora crassa OR74A | fungal specific transcription factor | protein | length=1176 (NCU06799)	| Neurospora crassa OR74A | fungal specific transcription factor | protein | length=1176	NCU06799	Neurospora crassa OR74A_rev.fasta	125831	1	4	4	4	0.0002	0.04
mcn10112019 (2)	Uncategorized Sample	7971	GPM22200020612	Cluster of | Neurospora crassa OR74A | initiation factor 5a | protein | length=163 (NCU05274)	| Neurospora crassa OR74A | initiation factor 5a | protein | length=163	NCU05274	Neurospora crassa OR74A_rev.fasta	18035.2	1	3	3	3	0.0001	0.319
mcn10112019 (2)	Uncategorized Sample	7971	GPM22200020612	Cluster of | Neurospora crassa OR74A | hypothetical protein, hypothetical protein, variant 1 | protein | length=161 (NCU03882)	| Neurospora crassa OR74A | hypothetical protein, hypothetical protein, variant 1 | protein | length=161	NCU03882	Neurospora crassa OR74A_rev.fasta	17213.3	1	3	3	3	0.0001	0.298
mcn10112019 (2)	Uncategorized Sample	7971	GPM22200020612	Cluster of | Neurospora crassa OR74A | 40S ribosomal protein S24 | protein | length=136 (NCU07182)	| Neurospora crassa OR74A | 40S ribosomal protein S24 | protein | length=136	NCU07182	Neurospora crassa OR74A_rev.fasta	15562.8	1	3	3	3	0.0001	0.294
mcn10112019 (2)	Uncategorized Sample	7971	GPM22200020612	Cluster of | Neurospora crassa OR74A | 40S ribosomal protein S27 | protein | length=82 (NCU00618)	| Neurospora crassa OR74A | 40S ribosomal protein S27 | protein | length=82	NCU00618	Neurospora crassa OR74A_rev.fasta	8897.3	1	2	3	3	0.0001	0.293
mcn10112019 (2)	Uncategorized Sample	7971	GPM22200020612	Cluster of | Neurospora crassa OR74A | small nuclear ribonucleoprotein-23 | protein | length=213 (NCU02508)	| Neurospora crassa OR74A | small nuclear ribonucleoprotein-23 | protein | length=213	NCU02508	Neurospora crassa OR74A_rev.fasta	21441.1	1	3	3	3	0.0001	0.23
mcn10112019 (2)	Uncategorized Sample	7971	GPM22200020612	Cluster of | Neurospora crassa OR74A | 60S ribosomal protein L32 | protein | length=131 (NCU00464)	| Neurospora crassa OR74A | 60S ribosomal protein L32 | protein | length=131	NCU00464	Neurospora crassa OR74A_rev.fasta	14964.9	1	2	3	3	0.0001	0.214
mcn10112019 (2)	Uncategorized Sample	7971	GPM22200020612	Cluster of Lysozyme C OS=Homo sapiens GN=LYZ PE=1 SV=1 (sp|P61626|LYSC_HUMAN)	Lysozyme C OS=Homo sapiens GN=LYZ PE=1 SV=1	sp|P61626|LYSC_HUMAN	Neurospora crassa OR74A_rev.fasta	16536.9	1	3	3	3	0.0001	0.196
mcn10112019 (2)	Uncategorized Sample	7971	GPM22200020612	Cluster of | Neurospora crassa OR74A | Rho-type GTPase | protein | length=195 (NCU01484)	| Neurospora crassa OR74A | Rho-type GTPase | protein | length=195	NCU01484	Neurospora crassa OR74A_rev.fasta	21971.2	1	3	3	3	0.0001	0.169
mcn10112019 (2)	Uncategorized Sample	7971	GPM22200020612	Cluster of | Neurospora crassa OR74A | Aconitate hydratase | protein | length=217 (NCU00977)	| Neurospora crassa OR74A | Aconitate hydratase | protein | length=217	NCU00977	Neurospora crassa OR74A_rev.fasta	23916.3	1	3	3	3	0.0001	0.166
mcn10112019 (2)	Uncategorized Sample	7971	GPM22200020612	Cluster of | Neurospora crassa OR74A | RNA polymerase-31 | protein | length=278 (NCU08365)	| Neurospora crassa OR74A | RNA polymerase-31 | protein | length=278	NCU08365	Neurospora crassa OR74A_rev.fasta	31730.7	1	3	3	3	0.0001	0.162
mcn10112019 (2)	Uncategorized Sample	7971	GPM22200020612	Cluster of | Neurospora crassa OR74A | hypothetical protein, hypothetical protein, variant 1 | protein | length=168 (NCU01145)	| Neurospora crassa OR74A | hypothetical protein, hypothetical protein, variant 1 | protein | length=168	NCU01145	Neurospora crassa OR74A_rev.fasta	17364.1	1	2	3	3	0.0001	0.161
mcn10112019 (2)	Uncategorized Sample	7971	GPM22200020612	Cluster of | Neurospora crassa OR74A | mitochondrial ribosomal protein subunit L23 | protein | length=228 (NCU08329)	| Neurospora crassa OR74A | mitochondrial ribosomal protein subunit L23 | protein | length=228	NCU08329	Neurospora crassa OR74A_rev.fasta	25967.3	1	3	3	3	0.0001	0.154
mcn10112019 (2)	Uncategorized Sample	7971	GPM22200020612	Cluster of | Neurospora crassa OR74A | 60S ribosomal protein L34 | protein | length=117 (NCU07857)	| Neurospora crassa OR74A | 60S ribosomal protein L34 | protein | length=117	NCU07857	Neurospora crassa OR74A_rev.fasta	13194.6	1	2	3	3	0.0001	0.145
mcn10112019 (2)	Uncategorized Sample	7971	GPM22200020612	Cluster of | Neurospora crassa OR74A | BYS1 domain-containing protein | protein | length=273 (NCU08907)	| Neurospora crassa OR74A | BYS1 domain-containing protein | protein | length=273	NCU08907	Neurospora crassa OR74A_rev.fasta	28837.8	1	2	3	3	0.0001	0.136
mcn10112019 (2)	Uncategorized Sample	7971	GPM22200020612	Cluster of | Neurospora crassa OR74A | 40S ribosomal protein S12 | protein | length=147 (NCU06432)	| Neurospora crassa OR74A | 40S ribosomal protein S12 | protein | length=147	NCU06432	Neurospora crassa OR74A_rev.fasta	16229.3	1	2	3	3	0.0001	0.136
mcn10112019 (2)	Uncategorized Sample	7971	GPM22200020612	Cluster of | Neurospora crassa OR74A | nitrilase-1 | protein | length=357 (NCU01838)	| Neurospora crassa OR74A | nitrilase-1 | protein | length=357	NCU01838	Neurospora crassa OR74A_rev.fasta	38931.1	1	3	3	3	0.0001	0.129
mcn10112019 (2)	Uncategorized Sample	7971	GPM22200020612	Cluster of | Neurospora crassa OR74A | 14-3-3 family protein 7 | protein | length=262 (NCU02806)	| Neurospora crassa OR74A | 14-3-3 family protein 7 | protein | length=262	NCU02806	Neurospora crassa OR74A_rev.fasta	29329.6	1	3	3	3	0.0001	0.122
mcn10112019 (2)	Uncategorized Sample	7971	GPM22200020612	Cluster of | Neurospora crassa OR74A | hypothetical protein | protein | length=366 (NCU06787)	| Neurospora crassa OR74A | hypothetical protein | protein | length=366	NCU06787	Neurospora crassa OR74A_rev.fasta	42599.8	1	3	3	3	0.0001	0.117
mcn10112019 (2)	Uncategorized Sample	7971	GPM22200020612	Cluster of | Neurospora crassa OR74A | zinc finger transcription factor-34 | protein | length=449 (NCU05285)	| Neurospora crassa OR74A | zinc finger transcription factor-34 | protein | length=449	NCU05285	Neurospora crassa OR74A_rev.fasta	47888.8	1	3	3	3	0.0001	0.114
mcn10112019 (2)	Uncategorized Sample	7971	GPM22200020612	Cluster of | Neurospora crassa OR74A | short-chain dehydrogenase/reductase SDR | protein | length=364 (NCU03893)	| Neurospora crassa OR74A | short-chain dehydrogenase/reductase SDR | protein | length=364	NCU03893	Neurospora crassa OR74A_rev.fasta	38786.7	1	3	3	3	0.0001	0.113
mcn10112019 (2)	Uncategorized Sample	7971	GPM22200020612	Cluster of | Neurospora crassa OR74A | outer mitochondrial membrane protein porin | protein | length=283 (NCU04304)	| Neurospora crassa OR74A | outer mitochondrial membrane protein porin | protein | length=283	NCU04304	Neurospora crassa OR74A_rev.fasta	30000	1	3	3	3	0.0001	0.113
mcn10112019 (2)	Uncategorized Sample	7971	GPM22200020612	Cluster of Peroxiredoxin-1 OS=Homo sapiens GN=PRDX1 PE=1 SV=1 (sp|Q06830|PRDX1_HUMAN)	Peroxiredoxin-1 OS=Homo sapiens GN=PRDX1 PE=1 SV=1	sp|Q06830|PRDX1_HUMAN	Neurospora crassa OR74A_rev.fasta	22110.9	1	2	3	3	0.0001	0.111
mcn10112019 (2)	Uncategorized Sample	7971	GPM22200020612	Cluster of | Neurospora crassa OR74A | zinc finger transcription factor-22 | protein | length=362 (NCU03206)	| Neurospora crassa OR74A | zinc finger transcription factor-22 | protein | length=362	NCU03206	Neurospora crassa OR74A_rev.fasta	40069.3	1	3	3	3	0.0001	0.108
mcn10112019 (2)	Uncategorized Sample	7971	GPM22200020612	Cluster of | Neurospora crassa OR74A | succinyl-CoA ligase alpha-chain | protein | length=333 (NCU01227)	| Neurospora crassa OR74A | succinyl-CoA ligase alpha-chain | protein | length=333	NCU01227	Neurospora crassa OR74A_rev.fasta	34738.3	1	2	2	3	0.0001	0.0991
mcn10112019 (2)	Uncategorized Sample	7971	GPM22200020612	Cluster of | Neurospora crassa OR74A | mitochondrial ribosomal protein L43 | protein | length=138 (NCU07549)	| Neurospora crassa OR74A | mitochondrial ribosomal protein L43 | protein | length=138	NCU07549	Neurospora crassa OR74A_rev.fasta	15103	1	2	3	3	0.0001	0.0942
mcn10112019 (2)	Uncategorized Sample	7971	GPM22200020612	Cluster of | Neurospora crassa OR74A | amidohydrolase | protein | length=407 (NCU08886)	| Neurospora crassa OR74A | amidohydrolase | protein | length=407	NCU08886	Neurospora crassa OR74A_rev.fasta	43921.8	1	3	3	3	0.0001	0.0934
mcn10112019 (2)	Uncategorized Sample	7971	GPM22200020612	Cluster of | Neurospora crassa OR74A | hypothetical protein | protein | length=312 (NCU02711)	| Neurospora crassa OR74A | hypothetical protein | protein | length=312	NCU02711	Neurospora crassa OR74A_rev.fasta	36423	1	3	3	3	0.0001	0.0929
mcn10112019 (2)	Uncategorized Sample	7971	GPM22200020612	Cluster of | Neurospora crassa OR74A | pyruvate dehydrogenase E1 component | protein | length=379 (NCU03004)	| Neurospora crassa OR74A | pyruvate dehydrogenase E1 component | protein | length=379	NCU03004	Neurospora crassa OR74A_rev.fasta	40934.7	1	3	3	3	0.0001	0.0923
mcn10112019 (2)	Uncategorized Sample	7971	GPM22200020612	Cluster of | Neurospora crassa OR74A | GDP-mannose pyrophosphorylase-1 | protein | length=451 (NCU05937)	| Neurospora crassa OR74A | GDP-mannose pyrophosphorylase-1 | protein | length=451	NCU05937	Neurospora crassa OR74A_rev.fasta	49872.4	1	3	3	3	0.0001	0.0909
mcn10112019 (2)	Uncategorized Sample	7971	GPM22200020612	Cluster of | Neurospora crassa OR74A | hydroxymethylglutaryl-CoA synthase | protein | length=454 (NCU03922)	| Neurospora crassa OR74A | hydroxymethylglutaryl-CoA synthase | protein | length=454	NCU03922	Neurospora crassa OR74A_rev.fasta	50189.1	1	3	3	3	0.0001	0.0903
mcn10112019 (2)	Uncategorized Sample	7971	GPM22200020612	Cluster of | Neurospora crassa OR74A | MADS box protein | protein | length=224 (NCU07430)	| Neurospora crassa OR74A | MADS box protein | protein | length=224	NCU07430	Neurospora crassa OR74A_rev.fasta	24315.8	1	2	3	3	0.0001	0.0893
mcn10112019 (2)	Uncategorized Sample	7971	GPM22200020612	Cluster of | Neurospora crassa OR74A | replication factor C subunit 4 | protein | length=357 (NCU10467)	| Neurospora crassa OR74A | replication factor C subunit 4 | protein | length=357	NCU10467	Neurospora crassa OR74A_rev.fasta	39353.5	1	2	3	3	0.0001	0.0868
mcn10112019 (2)	Uncategorized Sample	7971	GPM22200020612	Cluster of | Neurospora crassa OR74A | protein kinase gsk3, protein kinase gsk3, variant 1 | protein | length=394 (NCU04185)	| Neurospora crassa OR74A | protein kinase gsk3, protein kinase gsk3, variant 1 | protein | length=394	NCU04185	Neurospora crassa OR74A_rev.fasta	45131.6	1	3	3	3	0.0001	0.0863
mcn10112019 (2)	Uncategorized Sample	7971	GPM22200020612	Cluster of | Neurospora crassa OR74A | glycosyl hydrolase family 61-15 | protein | length=472 (NCU07974)	| Neurospora crassa OR74A | glycosyl hydrolase family 61-15 | protein | length=472	NCU07974	Neurospora crassa OR74A_rev.fasta	50360.4	1	3	3	3	0.0001	0.0847
mcn10112019 (2)	Uncategorized Sample	7971	GPM22200020612	Cluster of | Neurospora crassa OR74A | hypothetical protein, hypothetical protein, variant 1 | protein | length=367 (NCU05685)	| Neurospora crassa OR74A | hypothetical protein, hypothetical protein, variant 1 | protein | length=367	NCU05685	Neurospora crassa OR74A_rev.fasta	40517.9	1	3	3	3	0.0001	0.0845
mcn10112019 (2)	Uncategorized Sample	7971	GPM22200020612	Cluster of | Neurospora crassa OR74A | KH domain RNA binding protein | protein | length=481 (NCU09237)	| Neurospora crassa OR74A | KH domain RNA binding protein | protein | length=481	NCU09237	Neurospora crassa OR74A_rev.fasta	50481.9	1	3	3	3	0.0001	0.0811
mcn10112019 (2)	Uncategorized Sample	7971	GPM22200020612	Cluster of | Neurospora crassa OR74A | mitochondrial large ribosomal subunit | protein | length=364 (NCU05813)	| Neurospora crassa OR74A | mitochondrial large ribosomal subunit | protein | length=364	NCU05813	Neurospora crassa OR74A_rev.fasta	41483.2	1	3	3	3	0.0001	0.0797
mcn10112019 (2)	Uncategorized Sample	7971	GPM22200020612	Cluster of | Neurospora crassa OR74A | microsomal dipeptidase | protein | length=462 (NCU09538)	| Neurospora crassa OR74A | microsomal dipeptidase | protein | length=462	NCU09538	Neurospora crassa OR74A_rev.fasta	50788.5	1	3	3	3	0.0001	0.0779
mcn10112019 (2)	Uncategorized Sample	7971	GPM22200020612	Cluster of | Neurospora crassa OR74A | activator 1 subunit 3 | protein | length=389 (NCU08427)	| Neurospora crassa OR74A | activator 1 subunit 3 | protein | length=389	NCU08427	Neurospora crassa OR74A_rev.fasta	42461.5	1	3	3	3	0.0001	0.072
mcn10112019 (2)	Uncategorized Sample	7971	GPM22200020612	Cluster of | Neurospora crassa OR74A | importin alpha subunit | protein | length=548 (NCU01249)	| Neurospora crassa OR74A | importin alpha subunit | protein | length=548	NCU01249	Neurospora crassa OR74A_rev.fasta	59698.3	1	3	3	3	0.0001	0.0712
mcn10112019 (2)	Uncategorized Sample	7971	GPM22200020612	Cluster of | Neurospora crassa OR74A | map kinase kinase | protein | length=518 (NCU06419)	| Neurospora crassa OR74A | map kinase kinase | protein | length=518	NCU06419	Neurospora crassa OR74A_rev.fasta	55540	1	3	3	3	0.0001	0.0676
mcn10112019 (2)	Uncategorized Sample	7971	GPM22200020612	Cluster of | Neurospora crassa OR74A | mitochondrial citrate synthase | protein | length=469 (NCU01692)	| Neurospora crassa OR74A | mitochondrial citrate synthase | protein | length=469	NCU01692	Neurospora crassa OR74A_rev.fasta	51989.9	1	2	2	3	0.0001	0.0661
mcn10112019 (2)	Uncategorized Sample	7971	GPM22200020612	Cluster of | Neurospora crassa OR74A | aminotransferase | protein | length=517 (NCU03500)	| Neurospora crassa OR74A | aminotransferase | protein | length=517	NCU03500	Neurospora crassa OR74A_rev.fasta	57618	1	3	3	3	0.0001	0.0638
mcn10112019 (2)	Uncategorized Sample	7971	GPM22200020612	Cluster of | Neurospora crassa OR74A | eukaryotic translation initiation factor 3 subunit 6 | protein | length=443 (NCU05889)	| Neurospora crassa OR74A | eukaryotic translation initiation factor 3 subunit 6 | protein | length=443	NCU05889	Neurospora crassa OR74A_rev.fasta	51051.4	1	3	3	3	0.0001	0.0632
mcn10112019 (2)	Uncategorized Sample	7971	GPM22200020612	Cluster of | Neurospora crassa OR74A | INO80 chromatin remodeling complex | protein | length=750 (NCU01362)	| Neurospora crassa OR74A | INO80 chromatin remodeling complex | protein | length=750	NCU01362	Neurospora crassa OR74A_rev.fasta	83442.5	1	3	3	3	0.0001	0.0627
mcn10112019 (2)	Uncategorized Sample	7971	GPM22200020612	Cluster of | Neurospora crassa OR74A | Glucose-6-phosphate 1-dehydrogenase | protein | length=506 (NCU09111)	| Neurospora crassa OR74A | Glucose-6-phosphate 1-dehydrogenase | protein | length=506	NCU09111	Neurospora crassa OR74A_rev.fasta	58091	1	3	3	3	0.0001	0.0593
mcn10112019 (2)	Uncategorized Sample	7971	GPM22200020612	Cluster of | Neurospora crassa OR74A | SWR1-complex protein 4 | protein | length=733 (NCU04002)	| Neurospora crassa OR74A | SWR1-complex protein 4 | protein | length=733	NCU04002	Neurospora crassa OR74A_rev.fasta	80394.6	1	2	3	3	0.0001	0.0559
mcn10112019 (2)	Uncategorized Sample	7971	GPM22200020612	Cluster of | Neurospora crassa OR74A | 26S proteasome non-ATPase regulatory subunit 12 | protein | length=494 (NCU02650)	| Neurospora crassa OR74A | 26S proteasome non-ATPase regulatory subunit 12 | protein | length=494	NCU02650	Neurospora crassa OR74A_rev.fasta	57022.4	1	3	3	3	0.0001	0.0526
[truncated: 129 more rows]

## Sheet: CRF4-3_Protein Report
Experiment name	Biological sample category	Biological sample name	MS/MS sample name	Cluster	Protein name	Protein accession numbers	Database sources	Protein molecular weight (Da)	Protein identification probability	Exclusive unique peptide count	Exclusive unique spectrum count	Total spectrum count	Percentage of total spectra	Percentage sequence coverage
[truncated: 283 more rows]

[truncated: 2 more sheets: NCU00412_Protein Report, NCU0938_Protein Report]
