# Supplementary material for: The ACF chromatin-remodeling complex is essential for Polycomb repression
Source: eLife. 2022 Mar 8;11:e77595. doi: 10.7554/eLife.77595 (PMC9038196; doi:10.7554/eLife.77595)
Supplement: Figure 2—source data 3. [file elife-77595-fig2-data3.xlsx]

## Sheet: Sheet1
		[iswi/WT]					[acf1/WT]					[iaf_3/WT]					[iaf_2/WT]					[iaf_1/WT]					[set7/WT]
gene	H3K27me	average	log2FC	P-value	FDR	category	average	log2FC	P-value	FDR	category	average	log2FC	P-value	FDR	category	average	log2FC	P-value	FDR	category	average	log2FC	P-value	FDR	category	average	log2FC	P-value	FDR	category
NCU00003	0	194.165	-0.258357	0.361193	0.475586		194.165	0.290729	0.295524	0.4161		194.165	0.193334	0.489443	0.608379		194.165	0.08664	0.757087	0.86965		194.165	0.00717708	0.97908	0.987797		194.165	-1.02287	0.000388159	0.00973549
NCU00004	0	406.186	0.316682	0.152912	0.234269		406.186	0.285007	0.197984	0.308791		406.186	0.420478	0.05762	0.119695		406.186	0.284915	0.199037	0.38851		406.186	0.358948	0.099134	0.212939		406.186	-0.769097	0.000679325	0.0143022
NCU00005	0	174.585	-0.441443	0.0318219	0.0622981		174.585	-0.670287	0.00126429	0.00523912		174.585	-1.07355	8.24531e-07	9.80892e-06		174.585	-0.463652	0.0246374	0.0873004		174.585	-0.512165	0.00858138	0.0321947		174.585	-0.316628	0.114465	0.365373
NCU00006	0	535.48	-0.255863	0.129275	0.204059		535.48	-0.519436	0.00222287	0.0083751		535.48	0.185619	0.266093	0.389855		535.48	0.0051508	0.975464	0.990029		535.48	-0.353875	0.0313312	0.0901811		535.48	-0.582004	0.000564909	0.0124065
NCU00007	0	415.347	-1.21098	2.80239e-12	5.5601e-11		415.347	-1.27359	1.96077e-13	8.62249e-12		415.347	-0.588789	0.000464138	0.00240617		415.347	-0.459237	0.00590144	0.0295345		415.347	-0.78858	1.13546e-06	1.72806e-05		415.347	0.187115	0.247216	0.544732
NCU00008	0	313.526	0.947092	1.38387e-05	7.23493e-05		313.526	0.523594	0.0171402	0.0452901		313.526	0.608068	0.00571938	0.0191709		313.526	-0.0237777	0.915502	0.961388		313.526	0.251299	0.244804	0.407808		313.526	-0.480035	0.03305	0.179411
NCU00009	0	0.504907	3.57139	0.487885	0.603589		0.504907	1.38834	0.793158	1		0.504907	0.138779	0.979113	1		0.504907	0.0836898	0.987403	1		0.504907	0.413719	0.937605	1		0.504907	-0.249168	0.962508	1
NCU00010	0	1025.04	-1.74851	1.92375e-15	6.4459e-14		1025.04	-1.06792	8.9441e-07	1.03998e-05		1025.04	-1.03967	1.79068e-06	1.96619e-05		1025.04	-0.567093	0.00876509	0.0401268		1025.04	-0.754463	0.000444175	0.00280033		1025.04	-0.449926	0.0368554	0.191078
NCU00011	0	0.566381	-2.31243	0.622303	0.727792		0.566381	-2.38306	0.611735	1		0.566381	-2.22802	0.635091	1		0.566381	-2.28311	0.626749	1		0.566381	-3.50639	0.455142	1		0.566381	0.874852	0.846652	1
NCU00013	0	0.627173	-1.77773	0.50911	0.62325		0.627173	-1.84831	0.492447	1		0.627173	-1.69327	0.529452	1		0.627173	1.27221	0.599405	1		0.627173	0.0226426	0.99255	1		0.627173	-0.660334	0.805586	1
NCU00014	0	208.472	0.348378	0.0201806	0.042078		208.472	0.216387	0.15131	0.252155		208.472	0.17127	0.265053	0.388884		208.472	0.194269	0.202701	0.393798		208.472	0.113988	0.417298	0.585104		208.472	0.107992	0.469086	0.744498
NCU00015	0	192.19	-0.824773	0.00420042	0.0108032		192.19	-1.0423	0.000323418	0.00168258		192.19	-0.645078	0.0246345	0.0617989		192.19	-0.684306	0.0170699	0.0666241		192.19	-0.562967	0.0426089	0.114509		192.19	-0.0181442	0.948204	0.981319
NCU00017	0	80.8841	0.785883	0.141757	0.220208		80.8841	1.75755	0.000816454	0.00367072		80.8841	0.375858	0.488452	0.607717		80.8841	1.87807	0.000346505	0.00300131		80.8841	1.87661	0.000304692	0.0020669		80.8841	-0.109627	0.840405	0.936979
NCU00018	0	5027.58	0.21192	0.282926	0.391352		5027.58	0.494444	0.0121646	0.0341019		5027.58	0.506519	0.010235	0.030459		5027.58	0.601356	0.00229179	0.0139067		5027.58	0.780831	7.27871e-05	0.000618026		5027.58	-0.100804	0.609528	0.829066
NCU00019	0	118.231	0.570926	0.0424301	0.0797271		118.231	-0.133622	0.643188	0.739024		118.231	-0.221757	0.447582	0.569866		118.231	-0.756185	0.0119666	0.0504862		118.231	-0.439453	0.116297	0.240232		118.231	-0.0321233	0.910048	0.966809
NCU00021	0	1089.91	2.61107	0.000818736	0.00259972	up	1089.91	1.60699	0.0395124	0.0877636		1089.91	2.09464	0.00727495	0.0231557	up	1089.91	0.21889	0.779427	0.882418		1089.91	0.276464	0.723223	0.831499		1089.91	-0.905784	0.247193	0.544732
NCU00022	0	71.6905	0.647142	0.0262162	0.052924		71.6905	0.261154	0.37901	0.504295		71.6905	0.21992	0.464999	0.586156		71.6905	-0.187779	0.544519	0.725603		71.6905	0.0344866	0.903078	0.944205		71.6905	0.390007	0.179235	0.464424
NCU00023	0	1204.55	0.304119	0.103891	0.170653		1204.55	-0.0745978	0.690772	0.778098		1204.55	-0.401223	0.0333582	0.0782829		1204.55	-0.210452	0.26292	0.464959		1204.55	-0.590031	0.00156715	0.00805941		1204.55	-0.725153	0.000118695	0.00407567
NCU00024	0	830.72	-1.08573	4.51626e-08	4.07911e-07		830.72	-0.967427	9.92314e-07	1.13468e-05		830.72	-0.63408	0.00128919	0.00565516		830.72	-0.379579	0.0528091	0.152845		830.72	-0.655291	0.000730643	0.00425719		830.72	0.045855	0.813434	0.927357
NCU00025	0	595.794	-2.06555	1.1758e-14	3.54331e-13	down	595.794	-1.62993	7.14012e-10	1.63926e-08		595.794	-1.73471	6.89165e-11	1.98529e-09		595.794	-0.855148	0.00108052	0.00752188		595.794	-1.27788	8.53619e-07	1.36935e-05		595.794	-0.101708	0.694644	0.873526
NCU00026	0	371.155	-1.60068	0.000304736	0.00110243		371.155	-1.81238	4.45002e-05	0.000311925		371.155	-2.38331	1.06352e-07	1.56413e-06	down	371.155	-1.10919	0.0119996	0.0506008		371.155	-1.52429	0.000525178	0.00323471		371.155	-1.38493	0.00170177	0.0267735
NCU00027	0	55.9669	-0.21484	0.735105	0.817228		55.9669	-1.12642	0.0810558	0.155784		55.9669	-1.4822	0.0237872	0.0600214		55.9669	-1.82154	0.00599976	0.0299055		55.9669	-1.01965	0.106549	0.224823		55.9669	-1.2231	0.0573323	0.245107
NCU00028	0	488.176	0.772633	0.014675	0.0319398		488.176	1.19983	0.000140436	0.000824245		488.176	1.81343	7.79416e-09	1.51746e-07		488.176	0.943034	0.00285414	0.0165862		488.176	1.50733	1.4478e-06	2.10479e-05		488.176	0.692428	0.0283776	0.16392
NCU00029	0	464.149	-1.11594	0.0164189	0.0353101		464.149	-0.862197	0.0628444	0.127142		464.149	-0.0607601	0.895171	0.932079		464.149	1.39198	0.00239498	0.0144034		464.149	0.938111	0.0404652	0.109889		464.149	-0.119681	0.794855	0.920118
NCU00030	0	473.453	0.677756	0.00458428	0.0116807		473.453	0.813125	0.000644054	0.00302326		473.453	1.00857	2.28225e-05	0.000182065		473.453	1.00913	2.2234e-05	0.000316878		473.453	1.22369	1.88044e-07	3.64501e-06		473.453	0.152973	0.524003	0.782492
NCU00031	0	109.578	6.19632	7.71346e-14	2.02515e-12	up	109.578	2.94378	0.00058133	0.002776	up	109.578	7.13974	6.19168e-18	5.31342e-16	up	109.578	2.60451	0.00263595	0.015572	up	109.578	5.08829	8.26412e-10	2.73583e-08	up	109.578	-1.65469	0.207355	0.497157
NCU00032	0	543.141	-0.907684	2.17611e-06	1.36656e-05		543.141	-1.4943	2.07186e-14	1.06472e-12		543.141	-0.434816	0.0217867	0.0559316		543.141	-0.490698	0.00962788	0.0431211		543.141	-0.589883	0.00150028	0.00776406		543.141	-0.332829	0.0759831	0.291401
NCU00033	0	22.774	-0.622657	0.136532	0.213383		22.774	-0.601685	0.144866	0.244131		22.774	0.306901	0.415347	0.540478		22.774	-0.447335	0.274772	0.47839		22.774	-1.00093	0.008089	0.030845		22.774	-0.482614	0.220626	0.514046
NCU00034	0	340.634	0.154408	0.744607	0.825449		340.634	-1.18059	0.0135247	0.0372414		340.634	-0.48977	0.303398	0.429972		340.634	-1.05919	0.0266723	0.0921705		340.634	-0.951333	0.044671	0.11893		340.634	-0.226151	0.633395	0.842431
NCU00035	0	361.811	-1.32577	0.000286429	0.00104646		361.811	-0.703017	0.0519523	0.109283		361.811	-0.349027	0.333506	0.46154		361.811	0.0336807	0.925356	0.966784		361.811	-0.455049	0.203577	0.358022		361.811	-0.732001	0.0425311	0.207164
NCU00037	0	191.874	-0.345374	0.0841654	0.142779		191.874	0.175597	0.359125	0.4847		191.874	0.280619	0.144	0.242488		191.874	0.488553	0.00977027	0.0435111		191.874	0.479457	0.00785123	0.0301288		191.874	-0.125748	0.513171	0.774411
NCU00038	0	59.9775	0.196155	0.782203	0.85413		59.9775	-0.401244	0.574147	0.682659		59.9775	-0.241797	0.73485	0.814769		59.9775	-2.19132	0.00356886	0.0197756	down	59.9775	-1.22726	0.0844686	0.191195		59.9775	-1.3419	0.0634831	0.26236
NCU00039	0	7.58154	1.34519	0.131967	0.207608		7.58154	-0.615051	0.536495	0.650134		7.58154	0.75403	0.410651	0.536626		7.58154	-2.49636	0.0603779	0.168559		7.58154	-0.947382	0.312235	0.482704		7.58154	-1.26175	0.22416	0.518208
NCU00040	0	3555.38	0.816983	0.00400551	0.0103603		3555.38	0.464355	0.102036	0.186467		3555.38	0.508638	0.0733377	0.144844		3555.38	-0.0182001	0.948951	0.976951		3555.38	0.193089	0.496198	0.652274		3555.38	-0.264907	0.351318	0.654049
NCU00041	0	1151.53	-0.379227	0.0618995	0.109828		1151.53	-0.970028	2.06e-06	2.14975e-05		1151.53	-1.03574	4.34454e-07	5.55547e-06		1151.53	-0.691181	0.00069744	0.00530778		1151.53	-0.726164	0.000322165	0.00215239		1151.53	-0.180648	0.371887	0.673914
NCU00042	0	274.483	-1.89639	0.00140928	0.00415286		274.483	-1.8556	0.0017671	0.00693578		274.483	-2.00785	0.0007397	0.00355531	down	274.483	-2.11921	0.000371361	0.00318473	down	274.483	-1.92494	0.00110293	0.00600295		274.483	-1.14012	0.0533867	0.235812
NCU00043	0	2772.71	1.01645	3.26379e-09	3.61165e-08		2772.71	0.334711	0.0520013	0.10936		2772.71	0.565083	0.00103091	0.00467291		2772.71	0.282884	0.100837	0.242441		2772.71	0.521467	0.00234836	0.0112505		2772.71	0.142653	0.407471	0.698957
NCU00045	0	104.878	-0.659351	0.070677	0.122566		104.878	-0.597211	0.099736	0.18324		104.878	-0.27541	0.444835	0.567209		104.878	-0.225575	0.529921	0.713127		104.878	-0.663396	0.0592686	0.146867		104.878	-0.110997	0.754153	0.897865
NCU00046	0	1018.32	-0.257878	0.233048	0.333208		1018.32	0.178054	0.407455	0.532371		1018.32	0.068491	0.750686	0.827548		1018.32	0.764859	0.000352272	0.00304821		1018.32	0.852228	6.15964e-05	0.000533775		1018.32	0.068795	0.748625	0.895516
NCU00047	0	1.96595	-0.371212	0.797637	0.86654		1.96595	-0.554265	0.705475	0.790329		1.96595	-0.316337	0.827602	0.885079		1.96595	-0.981078	0.532589	1		1.96595	-1.58198	0.275452	0.443637		1.96595	0.0081085	0.995233	1
NCU00048	0	0.110488	-0.61161	0.907937	0.943183		0.110488	-0.682166	0.897381	1		0.110488	-0.527127	0.920615	1		0.110488	-0.582216	0.91235	1		0.110488	-1.8055	0.732841	1		0.110488	-0.915073	0.862648	1
NCU00050	0	2255.92	1.33946	4.16915e-05	0.000194368		2255.92	1.1819	0.000299877	0.00158269		2255.92	1.16363	0.000372866	0.00199019		2255.92	1.01429	0.00192606	0.0120857		2255.92	1.21544	0.000197414	0.00143735		2255.92	-0.32861	0.316233	0.621478
NCU00051	0	345.985	0.0421453	0.928399	0.957062		345.985	-0.143684	0.759543	0.830378		345.985	0.784089	0.093321	0.174169		345.985	0.217765	0.642096	0.794745		345.985	0.773234	0.0966517	0.2098		345.985	0.0250307	0.957359	0.984967
NCU00052	0	16.7687	3.7821	1.66618e-08	1.63262e-07	up	16.7687	0.939801	0.209556	0.32247		16.7687	1.91925	0.00685648	0.02203		16.7687	0.63599	0.41281	0.613567		16.7687	1.07731	0.121767	0.247824		16.7687	0.0478451	0.952184	0.982517
NCU00054	0	84.2853	-2.36592	1.89295e-06	1.20213e-05	down	84.2853	-0.826376	0.0646144	0.129979		84.2853	-0.660405	0.139523	0.236435		84.2853	0.136125	0.75463	0.868262		84.2853	-0.448643	0.297253	0.467097		84.2853	0.581487	0.175815	0.45884
NCU00055	0	91.8992	-1.00121	0.0165456	0.0355342		91.8992	-1.24328	0.00319918	0.0113564		91.8992	-0.244188	0.547413	0.659837		91.8992	-0.00189832	0.996233	0.998318		91.8992	-0.10045	0.798242	0.879978		91.8992	0.527559	0.181138	0.466762
NCU00056	0	141.772	0.63199	0.0116004	0.0261195		141.772	0.963055	9.29232e-05	0.000585539		141.772	0.477968	0.0591646	0.122072		141.772	0.0668259	0.796057	0.891896		141.772	0.537841	0.0259655	0.0774578		141.772	0.286151	0.254039	0.551204
NCU00057	0	296.419	-0.183621	0.50556	0.619616		296.419	0.0511008	0.852074	0.901002		296.419	0.0294677	0.914668	0.945381		296.419	-0.123105	0.655101	0.804512		296.419	-0.0194774	0.942508	0.966902		296.419	0.0921771	0.735361	0.890564
NCU00059	0	84.5022	1.04597	0.00495734	0.0124754		84.5022	1.03074	0.00556106	0.0179986		84.5022	0.826879	0.0276595	0.0674249		84.5022	-0.0148399	0.969461	0.987994		84.5022	0.0661547	0.858235	0.91839		84.5022	-0.464768	0.23344	0.528559
NCU00060	0	172.156	0.121249	0.551114	0.662069		172.156	-0.129665	0.528599	0.643743		172.156	-0.118681	0.567938	0.677822		172.156	-0.0936603	0.650354	0.800956		172.156	-0.0467454	0.809802	0.8884		172.156	0.152259	0.44585	0.729969
NCU00061	0	43.8349	-0.901656	0.0106671	0.0242465		43.8349	-1.42484	0.00014308	0.000835879		43.8349	-1.10587	0.00253208	0.00986385		43.8349	0.0676609	0.834031	0.915261		43.8349	-0.610755	0.0502471	0.1296		43.8349	-0.231978	0.471473	0.745206
NCU00064	0	1864.54	-1.47426	1.98069e-10	2.83298e-09		1864.54	-1.1536	5.92941e-07	7.24897e-06		1864.54	-1.37124	3.23594e-09	7.04495e-08		1864.54	-0.475537	0.0389232	0.122251		1864.54	-0.694404	0.00248532	0.0118233		1864.54	-0.417283	0.0695577	0.277365
NCU00065	0	179.246	1.44493	1.84222e-05	9.3457e-05		179.246	0.673831	0.0482005	0.102884		179.246	0.892984	0.00875428	0.0269145		179.246	0.229202	0.506972	0.695604		179.246	0.551207	0.101145	0.21626		179.246	-0.381034	0.274031	0.57623
NCU00066	0	386.14	0.244716	0.111303	0.180538		386.14	0.215133	0.160822	0.264449		386.14	0.203954	0.187075	0.296601		386.14	-0.0826506	0.597383	0.765801		386.14	-0.101149	0.497599	0.653436		386.14	0.025022	0.870187	0.949165
NCU00067	0	673.845	-0.389502	0.141979	0.220376		673.845	-0.646912	0.0149385	0.0404786		673.845	-0.586685	0.0274634	0.0670207		673.845	-0.558238	0.0357206	0.11469		673.845	-0.615681	0.0193858	0.0609572		673.845	-0.149972	0.570009	0.806432
NCU00068	0	930.024	0.108777	0.494288	0.60923		930.024	-0.0204503	0.897877	0.930511		930.024	0.236005	0.137764	0.234263		930.024	0.214732	0.176609	0.357055		930.024	0.206221	0.187609	0.33724		930.024	-0.305741	0.0552591	0.240164
NCU00069	0	29.9292	-0.710225	0.154057	0.235685		29.9292	-0.51693	0.286154	0.406628		29.9292	0.332647	0.467123	0.587911		29.9292	0.408378	0.367852	0.573549		29.9292	0.545116	0.202118	0.356448		29.9292	0.453183	0.307224	0.611486
NCU00070	0	286.306	-0.529905	0.0190685	0.0401348		286.306	-0.500794	0.0261779	0.0632377		286.306	-0.285116	0.204503	0.318285		286.306	-0.318314	0.156278	0.328461		286.306	-0.392533	0.0721175	0.169624		286.306	-0.0879354	0.69053	0.870531
NCU00071	0	0.292883	2.49848	0.630969	0.73426		0.292883	-0.0162698	0.997551	1		0.292883	0.138769	0.979114	1		0.292883	0.0836798	0.987405	1		0.292883	1.43191	0.782768	1		0.292883	-0.249178	0.962507	1
NCU00072	0	584.406	-0.314317	0.0579111	0.103925		584.406	-0.41838	0.0116923	0.0330925		584.406	-0.466338	0.00525406	0.0178962		584.406	-0.28926	0.08098	0.208532		584.406	-0.27576	0.087455	0.19565		584.406	0.0388105	0.811764	0.927357
NCU00073	0	429.704	0.516975	0.102741	0.168996		429.704	-0.0388271	0.90289	0.934283		429.704	-0.0107655	0.97305	0.983846		429.704	-0.310641	0.331106	0.538647		429.704	-0.0962386	0.760476	0.856069		429.704	-0.264075	0.406583	0.698186
NCU00074	0	296.088	0.0708395	0.891827	0.933929		296.088	-0.561766	0.282168	0.402726		296.088	-0.786441	0.133149	0.228497		296.088	-1.17691	0.0250226	0.0882176		296.088	-0.705815	0.174807	0.320232		296.088	-1.41119	0.00715499	0.0676838
NCU00075	0	609.739	0.471681	0.0362618	0.0697085		609.739	0.072459	0.74867	0.823071		609.739	-0.0892146	0.69458	0.781491		609.739	-0.719779	0.00173837	0.0110848		609.739	-0.448009	0.0461334	0.121869		609.739	0.166129	0.460825	0.740224
NCU00076	0	172.11	0.57316	0.0715777	0.123971		172.11	0.566351	0.0745956	0.145842		172.11	0.405984	0.204829	0.318691		172.11	0.573218	0.0717413	0.190248		172.11	0.603069	0.0530507	0.135173		172.11	0.415979	0.189504	0.477581
NCU00077	0	189.795	0.72469	2.46723e-06	1.53529e-05		189.795	1.04604	2.22088e-12	8.1793e-11		189.795	0.730488	2.42572e-06	2.54946e-05		189.795	0.538059	0.000611529	0.00476288		189.795	0.620412	1.40363e-05	0.000151486		189.795	0.101022	0.524499	0.782492
NCU00078	0	460.579	0.183881	0.425112	0.541808		460.579	-0.0525002	0.820377	0.876609		460.579	-0.827579	0.000469406	0.00242494		460.579	-0.265853	0.253173	0.453845		460.579	-0.226849	0.320356	0.490665		460.579	0.434542	0.0575569	0.24534
NCU00079	0	98.3866	10.4582	0.0390594	0.0742376		98.3866	-1.29181	0.806344	0.866538		98.3866	-1.13677	0.829203	0.886041		98.3866	-1.19186	0.821063	0.906091		98.3866	-2.41514	0.646725	0.775947		98.3866	-1.52472	0.772319	0.907999
NCU00080	0	1015.47	-2.0143	2.05144e-07	1.6274e-06	down	1015.47	-0.84416	0.0282678	0.0670042		1015.47	-0.608074	0.113972	0.202736		1015.47	-0.142775	0.710102	0.843794		1015.47	-0.628807	0.1011	0.216216		1015.47	-0.287302	0.454256	0.734981
NCU00081	0	112.693	-0.538345	0.11026	0.17924		112.693	0.258754	0.424488	0.549279		112.693	-0.0211	0.94896	0.967992		112.693	0.257238	0.428827	0.626936		112.693	0.299571	0.341356	0.510791		112.693	0.595904	0.0614414	0.256257
NCU00082	0	1.5368	-0.331388	0.845394	0.902563		1.5368	-1.38244	0.479535	1		1.5368	0.36315	0.819044	1		1.5368	-0.250108	0.882232	1		1.5368	-0.484515	0.751422	1		1.5368	0.7407	0.620014	1
NCU00083	0	668.369	0.499448	0.00176067	0.00505315		668.369	0.385152	0.0159831	0.0427974		668.369	0.435004	0.00664878	0.0215427		668.369	0.412963	0.00991532	0.0439085		668.369	0.61993	7.28725e-05	0.000618157		668.369	0.103407	0.518224	0.778101
NCU00084	0	24.5988	0.449064	0.292686	0.401628		24.5988	0.440724	0.298993	0.419801		24.5988	0.035989	0.936255	0.959151		24.5988	0.726095	0.0820166	0.210012		24.5988	0.48415	0.217012	0.37622		24.5988	0.121656	0.776095	0.910892
NCU00085	0	95.42	0.263307	0.328725	0.441015		95.42	-0.200225	0.469084	0.590127		95.42	0.552272	0.0383119	0.0868973		95.42	-0.0630205	0.819249	0.905359		95.42	-0.22587	0.386444	0.556341		95.42	-0.29985	0.273797	0.57602
NCU00086	0	5.2206	2.09358	0.00605815	0.0148783	up	5.2206	0.473439	0.58118	0.688797		5.2206	-0.531145	0.600043	0.703903		5.2206	0.0147889	0.987183	0.993151		5.2206	-0.0625232	0.938565	0.964761		5.2206	-1.33214	0.223882	0.518009
NCU00087	0	593.39	1.71311	0.000821993	0.00260747		593.39	0.807197	0.115536	0.2049		593.39	1.03202	0.0441683	0.0970335		593.39	-0.336311	0.514032	0.701122		593.39	0.316219	0.537032	0.686652		593.39	-0.246915	0.631148	0.841239
NCU00088	0	639.711	1.42987	0.0078563	0.0186446		639.711	1.45136	0.00696345	0.0216878		639.711	1.77509	0.000961809	0.00441862		639.711	1.01058	0.0605392	0.168861		639.711	1.36059	0.0113048	0.0398259		639.711	-0.692815	0.200838	0.48995
NCU00089	0	251.258	0.649124	0.00107238	0.00328223		251.258	0.0716204	0.723227	0.804454		251.258	-0.0668745	0.744286	0.822548		251.258	-0.17567	0.392837	0.596774		251.258	-0.146822	0.45448	0.618403		251.258	-0.0922711	0.647223	0.849707
NCU00090	0	1746.23	1.06426	0.0542599	0.0983865		1746.23	1.02825	0.0629346	0.127266		1746.23	1.07554	0.0517683	0.109606		1746.23	0.205031	0.710978	0.844371		1746.23	0.420589	0.446748	0.611524		1746.23	-2.05245	0.000221268	0.00649029	down
NCU00091	0	253.303	-0.103729	0.593208	0.701643		253.303	0.308812	0.103339	0.188256		253.303	-0.224548	0.253416	0.375892		253.303	0.328253	0.0844277	0.214553		253.303	0.205063	0.263871	0.430165		253.303	0.305606	0.103742	0.346531
NCU00092	0	49.1297	2.20305	5.38442e-08	4.81333e-07	up	49.1297	0.911757	0.0304769	0.0712095		49.1297	1.0986	0.00901961	0.0275958		49.1297	-0.171916	0.70574	0.841464		49.1297	0.258572	0.531804	0.682436		49.1297	-0.622601	0.176168	0.458954
NCU00093	0	3.72027	0.883745	0.318589	0.429885		3.72027	-1.37337	0.232073	0.348445		3.72027	-1.23989	0.28262	0.407783		3.72027	-1.2774	0.266828	0.469377		3.72027	-1.48624	0.132351	0.262889		3.72027	-0.434434	0.653963	0.853561
NCU00095	0	642.052	0.168435	0.221336	0.319678		642.052	0.245121	0.0736376	0.14448		642.052	0.25138	0.0679795	0.136252		642.052	-0.0122088	0.929938	0.968348		642.052	0.0434564	0.745448	0.846917		642.052	0.0687956	0.614945	0.831424
NCU00096	0	4.87613	-0.990037	0.340514	0.453543		4.87613	0.761863	0.364539	0.489838		4.87613	-1.92215	0.129927	0.223908		4.87613	0.352209	0.687775	0.828413		4.87613	-0.241847	0.771623	0.863011		4.87613	0.017999	0.983618	0.994886
NCU00097	0	16.6939	1.51577	0.00213255	0.00598251		16.6939	-0.610645	0.28589	0.406463		16.6939	-0.439034	0.442025	0.565094		16.6939	-0.502424	0.379432	0.585245		16.6939	-2.27634	0.000212113	0.00152211	down	16.6939	-1.92337	0.00414702	0.0472294
NCU00099	0	0.122327	-1.12326	0.831287	0.891384		0.122327	-1.19382	0.820878	1		0.122327	-1.03879	0.843818	1		0.122327	-1.09388	0.83565	1		0.122327	-2.31715	0.660326	1		0.122327	-1.42673	0.786707	1
NCU00100	0	306.472	0.0693027	0.801722	0.869697		306.472	-0.208888	0.450759	0.574211		306.472	-0.523386	0.0614035	0.125869		306.472	-0.572106	0.0408462	0.126818		306.472	-0.457808	0.0942685	0.206069		306.472	-0.477896	0.0846627	0.309526
NCU00101	0	396.621	0.613295	0.000720241	0.00232315		396.621	0.732872	4.78612e-05	0.0003318		396.621	0.552594	0.00243629	0.00960926		396.621	0.81878	5.59792e-06	9.84528e-05		396.621	0.866058	8.08787e-07	1.30692e-05		396.621	0.565523	0.00166787	0.0265295
NCU00102	0	1104.15	-0.487827	0.0302993	0.0597444		1104.15	0.0368908	0.869148	0.912392		1104.15	0.231543	0.300984	0.427923		1104.15	-0.210732	0.348126	0.555167		1104.15	0.0839956	0.705838	0.82086		1104.15	0.0612063	0.784215	0.915743
NCU00103	0	422.11	0.982427	0.00398877	0.0103225		422.11	1.24036	0.000269901	0.00144061		422.11	0.816399	0.01695	0.0457889		422.11	0.234255	0.495583	0.68653		422.11	0.683997	0.0439907	0.117543		422.11	0.0730602	0.831367	0.934079
NCU00104	0	1626.81	-1.37956	0.00114116	0.00346177		1626.81	-0.654165	0.122167	0.213659		1626.81	-0.350634	0.407245	0.533449		1626.81	-0.630709	0.136196	0.298885		1626.81	-0.617233	0.144094	0.279676		1626.81	0.325298	0.441375	0.725957
NCU00105	0	195.501	1.0831	0.0147704	0.0321254		195.501	0.0963694	0.829597	0.883683		195.501	0.660305	0.138673	0.235356		195.501	-0.635882	0.160845	0.334324		195.501	-0.638444	0.152312	0.29134		195.501	-0.942044	0.0376753	0.193704
NCU00106	0	714.328	0.995005	0.0245836	0.0500711		714.328	1.5869	0.000329522	0.0017093		714.328	1.38146	0.00178674	0.00736958		714.328	0.881491	0.0465326	0.139276		714.328	1.08378	0.0140947	0.0473159		714.328	0.0134101	0.975895	0.99272
NCU00107	0	150.113	0.683765	0.00103163	0.00317169		150.113	0.737609	0.000358632	0.00184192		150.113	1.15743	1.28238e-08	2.41684e-07		150.113	0.816348	7.97876e-05	0.000922998		150.113	0.683322	0.000508086	0.00314054		150.113	0.316185	0.130843	0.394489
NCU00108	0	97.7749	0.434264	0.153913	0.23554		97.7749	-0.0404567	0.896244	0.9298		97.7749	0.0473272	0.879156	0.920718		97.7749	-0.462559	0.148297	0.317078		97.7749	-0.24241	0.417908	0.585529		97.7749	0.494211	0.100198	0.338544
NCU00109	0	317.356	0.00693934	0.972034	0.987447		317.356	0.105747	0.590831	0.696499		317.356	0.147792	0.454277	0.575513		317.356	0.0562595	0.776058	0.88057		317.356	0.0343573	0.857479	0.918058		317.356	0.35639	0.06584	0.267974
NCU00110	0	12.2007	0.600215	0.35279	0.466573		12.2007	1.28192	0.0355702	0.0806787		12.2007	0.969925	0.123827	0.215836		12.2007	0.801656	0.207608	0.400364		12.2007	0.132691	0.82805	0.900927		12.2007	0.483143	0.447044	0.730828
NCU00111	0	325.277	-0.944433	0.000149307	0.000591488		325.277	-0.158824	0.510453	0.627174		325.277	0.422597	0.0767915	0.150102		325.277	0.507679	0.0330082	0.108107		325.277	0.39718	0.090374	0.200405		325.277	-0.0336609	0.888074	0.95769
NCU00112	0	696.491	0.339134	0.144733	0.223996		696.491	0.474006	0.0410112	0.0903535		696.491	0.657607	0.00456905	0.0158937		696.491	0.601892	0.00944012	0.0423679		696.491	0.702348	0.00222429	0.0107788		696.491	0.270874	0.242748	0.53935
NCU00114	0	417.925	0.570896	0.121972	0.194319		417.925	0.758851	0.039476	0.0877331		417.925	0.775586	0.0354828	0.0821027		417.925	0.227757	0.538478	0.72092		417.925	0.48285	0.188388	0.337829		417.925	-0.110044	0.766329	0.904639
NCU00115	0	113.329	2.20901	8.22053e-05	0.000352968	up	113.329	0.504321	0.37443	0.499997		113.329	0.561161	0.323577	0.450462		113.329	-1.0983	0.0625918	0.172978		113.329	-0.667356	0.240143	0.402793		113.329	-0.602781	0.295367	0.599597
NCU00116	0	768.167	0.434265	0.0808279	0.137849		768.167	0.0680784	0.784842	0.850879		768.167	0.0101201	0.967694	0.980788		768.167	0.0400774	0.872462	0.936188		768.167	0.0541847	0.826752	0.899958		768.167	-0.339386	0.174229	0.456019
NCU00117	0	497.059	-0.658151	8.54066e-05	0.00036538		497.059	0.00815822	0.959947	0.974727		497.059	-0.417918	0.0119366	0.034412		497.059	0.239744	0.138297	0.302192		497.059	0.0999492	0.526922	0.679129		497.059	0.234851	0.142928	0.413768
NCU00118	0	177.765	3.61334	1.04227e-17	4.779e-16	up	177.765	2.69353	2.47481e-10	6.17934e-09	up	177.765	4.83754	7.70554e-31	3.09588e-28	up	177.765	0.1342	0.775222	0.879968		177.765	0.417868	0.338136	0.508298		177.765	0.731756	0.100466	0.339319
NCU00119	0	365.442	-0.348666	0.11796	0.189032		365.442	-0.344171	0.121964	0.213389		365.442	0.0164677	0.940673	0.96245		365.442	-0.0395523	0.858131	0.927909		365.442	-0.117061	0.589149	0.73068		365.442	-0.0339832	0.876996	0.952511
NCU00120	0	164.284	-0.33032	0.206167	0.301312		164.284	-0.282347	0.277385	0.397569		164.284	-0.572607	0.0311515	0.0740182		164.284	-0.235688	0.365609	0.571359		164.284	0.013316	0.957452	0.974541		164.284	-0.125698	0.623503	0.83698
NCU00121	0	3190.49	-1.96315	4.94538e-05	0.000225674		3190.49	-1.17723	0.0148294	0.0402693		3190.49	-1.05064	0.0296703	0.0712458		3190.49	0.406756	0.3994	0.602197		3190.49	-0.110337	0.819151	0.894772		3190.49	-0.394375	0.414001	0.704356
NCU00122	0	1095.95	0.69243	0.00652914	0.0158925		1095.95	0.391022	0.125056	0.217347		1095.95	0.711547	0.00520528	0.0177506		1095.95	0.0236135	0.926448	0.966784		1095.95	0.428506	0.0911371	0.201491		1095.95	0.638704	0.0120053	0.0935031
NCU00123	0	0.10073	0	1	1		0.10073	0	1	1		0.10073	0	1	1		0.10073	0	1	1		0.10073	1.13497	0.829963	1		0.10073	1.88619	0.721739	1
NCU00124	0	652.111	-0.232729	0.201815	0.296262		652.111	-0.618025	0.000769818	0.00348945		652.111	-0.234936	0.198446	0.310673		652.111	-0.133046	0.464895	0.65731		652.111	-0.247233	0.167427	0.311207		652.111	-0.349887	0.0540652	0.237288
NCU00125	0	57.915	-0.0818069	0.783515	0.855271		57.915	0.27891	0.328334	0.4524		57.915	0.306634	0.288115	0.413752		57.915	0.338269	0.237465	0.43626		57.915	0.23182	0.382499	0.552913		57.915	0.316957	0.255937	0.553655
NCU00126	0	279.136	-0.693931	1.34469e-05	7.05707e-05		279.136	-0.745938	2.80168e-06	2.7871e-05		279.136	-0.736871	4.72039e-06	4.59004e-05		279.136	-0.99497	1.23745e-09	6.65073e-08		279.136	-0.889175	3.56836e-09	1.06557e-07		279.136	-0.475521	0.00203502	0.0301196
NCU00127	0	1376.06	-1.89184	6.08459e-05	0.000271962		1376.06	-1.02748	0.0289981	0.0684235		1376.06	-0.842178	0.0734775	0.144924		1376.06	-0.5663	0.228488	0.424155		1376.06	-0.956964	0.0416406	0.112488		1376.06	0.034374	0.941664	0.979156
NCU00128	0	24.7157	-0.819184	0.133247	0.209294		24.7157	1.24317	0.00838656	0.0253355		24.7157	-0.758825	0.165451	0.269969		24.7157	0.114653	0.81942	0.905433		24.7157	-1.04227	0.0371006	0.102961		24.7157	0.00815076	0.986854	0.996295
NCU00129	0	141.029	-1.64551	0.0231019	0.0473652		141.029	-0.997403	0.164789	0.269273		141.029	-0.989879	0.168614	0.274068		141.029	-0.581706	0.416551	0.616455		141.029	-0.389515	0.583817	0.725994		141.029	0.560712	0.430267	0.716924
NCU00130	0	213.811	0.426996	0.419223	0.535655		213.811	0.759069	0.150106	0.250953		213.811	-1.77245	0.00119417	0.0052935		213.811	0.0127988	0.980746	0.991286		213.811	0.0634319	0.904104	0.944695		213.811	0.380473	0.471013	0.745206
NCU00132	0	310.79	-0.927724	0.0029463	0.00794216		310.79	-0.289951	0.34546	0.470207		310.79	-0.564885	0.0683356	0.13681		310.79	-0.251098	0.414375	0.614602		310.79	-0.141128	0.641294	0.771735		310.79	0.561207	0.0643103	0.26436
NCU00133	0	407.723	0.721003	0.000141509	0.000565035		407.723	0.716541	0.000151879	0.000875134		407.723	0.600175	0.0016326	0.00685211		407.723	0.31627	0.0993342	0.239693		407.723	0.389397	0.0365935	0.101785		407.723	0.242162	0.203356	0.492835
NCU00134	0	517.232	1.18377	6.70071e-13	1.51446e-11		517.232	0.563416	0.000737493	0.00337058		517.232	0.707753	2.24515e-05	0.000179755		517.232	0.12183	0.473513	0.666337		517.232	0.236556	0.149225	0.286872		517.232	0.132699	0.429359	0.715907
NCU00135	0	420.744	0.105602	0.627929	0.731782		420.744	-0.0355376	0.870666	0.912817		420.744	0.172803	0.42793	0.552418		420.744	0.221034	0.309446	0.516619		420.744	0.16859	0.43008	0.596477		420.744	-0.0802252	0.712029	0.881966
NCU00136	0	204.851	1.78623	0.000266084	0.000978843		204.851	1.1454	0.0197281	0.050427		204.851	0.626484	0.204532	0.318285		204.851	-0.382191	0.444671	0.640756		204.851	-0.10873	0.824984	0.898625		204.851	-0.33039	0.506227	0.769105
NCU00137	0	1228.45	0.899143	5.41932e-05	0.000244622		1228.45	0.691646	0.00191871	0.00739296		1228.45	0.739484	0.000916915	0.00424547		1228.45	0.471437	0.034859	0.112803		1228.45	0.770507	0.000511918	0.0031578		1228.45	-0.00263561	0.9906	0.997718
NCU00138	0	36.3106	1.75458	0.0221023	0.0455693		36.3106	-0.721278	0.365818	0.491035		36.3106	-1.1105	0.172703	0.27897		36.3106	-0.702218	0.379843	0.585565		36.3106	-1.47532	0.06154	0.151056		36.3106	-0.525548	0.504749	0.767996
NCU00142	0	219.561	0.757517	0.0619974	0.109961		219.561	-0.0960814	0.814562	0.872822		219.561	0.601403	0.13934	0.236215		219.561	0.219196	0.59145	0.761542		219.561	0.369628	0.359829	0.529823		219.561	-0.601053	0.144092	0.415609
NCU00144	0	2053.48	-1.1126	0.00058854	0.00195155		2053.48	-1.15621	0.000354538	0.00182301		2053.48	-1.11254	0.00059103	0.0029566		2053.48	-1.09794	0.000695361	0.00529662		2053.48	-1.11789	0.000536307	0.00328967		2053.48	-0.00422467	0.989558	0.997164
NCU00145	0	248.131	0.476597	0.0031952	0.00853152		248.131	0.75414	1.88116e-06	1.98345e-05		248.131	0.729874	5.00077e-06	4.80454e-05		248.131	0.250368	0.128429	0.286343		248.131	0.446959	0.00341231	0.0152716		248.131	0.190715	0.237541	0.533674
NCU00146	0	224.063	-1.83489	6.47221e-05	0.00028781		224.063	-0.792351	0.0787599	0.152569		224.063	-1.33335	0.00340692	0.0124771		224.063	-0.891303	0.048523	0.143398		224.063	-1.20864	0.00695659	0.0274138		224.063	0.230027	0.606313	0.827572
NCU00147	0	732.503	-0.857249	3.23742e-05	0.000155198		732.503	0.115744	0.567471	0.676998		732.503	-0.0730734	0.719401	0.801562		732.503	-0.258939	0.203962	0.395181		732.503	-0.106551	0.595525	0.73538		732.503	-0.0974767	0.630041	0.840567
NCU00148	0	576.276	0.245342	0.397563	0.514218		576.276	0.415343	0.151239	0.252084		576.276	0.429535	0.138214	0.234756		576.276	0.241151	0.405819	0.60742		576.276	0.156572	0.586513	0.728321		576.276	0.223642	0.439499	0.725207
NCU00149	0	175.864	10.7984	0.000376528	0.00133392	up	175.864	8.20602	0.0069661	0.0216884	up	175.864	12.1729	6.09087e-05	0.000422457	up	175.864	10.1445	0.000837827	0.00613863	up	175.864	11.1279	0.00024722	0.00173015	up	175.864	0	1	1
NCU00150	0	358.539	1.1275	1.09268e-06	7.32759e-06		358.539	0.836781	0.000316467	0.00165322		358.539	1.03436	8.34746e-06	7.52122e-05		358.539	0.662852	0.00458189	0.0241751		358.539	1.10433	1.26096e-06	1.87637e-05		358.539	0.460241	0.0483135	0.223321
NCU00151	0	56.4153	1.22125	0.0465189	0.0861431		56.4153	0.213264	0.731466	0.810306		56.4153	0.167918	0.787803	0.854403		56.4153	-1.09292	0.0916501	0.226456		56.4153	-0.517154	0.402318	0.570984		56.4153	-1.04028	0.103053	0.345091
NCU00152	0	793.527	-0.704244	0.000368441	0.00130769		793.527	-0.714229	0.000299095	0.00158022		793.527	-0.516601	0.00885307	0.0271898		793.527	-0.500394	0.0111253	0.0478031		793.527	-0.575052	0.00310372	0.0140975		793.527	-0.227925	0.243562	0.540313
NCU00153	0	352.326	2.61002	2.04713e-05	0.000102818	up	352.326	1.40683	0.0219446	0.054964		352.326	1.46856	0.0167893	0.0454936		352.326	0.101608	0.86935	0.934415		352.326	0.520067	0.396705	0.5662		352.326	-1.91837	0.00236472	0.0330031
NCU00154	0	335.682	-0.671962	0.000121379	0.000493917		335.682	0.274862	0.0933305	0.174371		335.682	0.287103	0.0817341	0.157499		335.682	0.363787	0.026407	0.091473		335.682	0.559956	0.000351493	0.00231337		335.682	0.494982	0.00207481	0.0303779
NCU00155	0	427.034	0.263737	0.433468	0.549635		427.034	-0.0401881	0.905196	0.936121		427.034	0.473072	0.159612	0.262526		427.034	0.2081	0.536843	0.71931		427.034	-0.036658	0.912824	0.949265		427.034	-0.90135	0.00802515	0.0727899
NCU00157	0	420.105	0.352206	0.0890401	0.149618		420.105	0.617521	0.00265039	0.00973681		420.105	0.32459	0.118226	0.208624		420.105	0.757853	0.000222325	0.00206858		420.105	0.786024	9.66815e-05	0.000779715		420.105	0.107804	0.602166	0.824809
NCU00158	0	90.6141	0.328849	0.285934	0.394368		90.6141	0.222489	0.471036	0.591993		90.6141	-0.168497	0.595333	0.700592		90.6141	-0.265684	0.403489	0.605867		90.6141	-0.35293	0.243507	0.406335		90.6141	-0.456137	0.148175	0.420902
NCU00159	0	80.8427	0.289376	0.304111	0.413963		80.8427	0.734394	0.00703993	0.0219028		80.8427	0.2808	0.322053	0.448995		80.8427	0.234599	0.407718	0.609009		80.8427	0.324214	0.219347	0.378959		80.8427	0.360264	0.189689	0.47784
NCU00160	0	1083.02	-0.610354	7.13175e-07	5.0142e-06		1083.02	0.040775	0.734185	0.811894		1083.02	-0.028796	0.811691	0.873133		1083.02	0.0580464	0.629573	0.787694		1083.02	0.0806272	0.492309	0.648416		1083.02	0.147877	0.214275	0.506729
NCU00161	0	296.783	-0.795586	0.00472693	0.0120027		296.783	-0.651899	0.0200797	0.0512369		296.783	-1.04693	0.00022668	0.00130274		296.783	-1.11167	9.06487e-05	0.00101736		296.783	-1.40655	4.47693e-07	7.79298e-06		296.783	-0.987973	0.000437457	0.0105148
NCU00162	0	414.064	0.382679	0.188225	0.27948		414.064	0.715894	0.0133539	0.0368399		414.064	0.753867	0.00926764	0.0282129		414.064	0.937346	0.00117901	0.00802675		414.064	0.888647	0.00192995	0.00958861		414.064	-0.199943	0.493695	0.760267
NCU00163	0	185.401	0.416297	0.220184	0.318518		185.401	0.744064	0.0270834	0.0648754		185.401	0.476031	0.161182	0.264566		185.401	1.2201	0.000264475	0.00239383		185.401	1.06205	0.00132115	0.0069968		185.401	0.250609	0.45902	0.738545
NCU00164	0	451.677	1.67969	7.28445e-07	5.10658e-06		451.677	0.194541	0.569492	0.678402		451.677	0.285341	0.404397	0.530967		451.677	-0.329114	0.339424	0.546934		451.677	-0.0472117	0.889523	0.936792		451.677	-0.194846	0.56948	0.805971
NCU00166	0	77.7831	-1.08038	0.168891	0.254959		77.7831	0.974294	0.202404	0.3142		77.7831	-1.03522	0.187824	0.297396		77.7831	0.0749742	0.922491	0.96548		77.7831	0.0862083	0.910084	0.947942		77.7831	1.09413	0.151539	0.425046
NCU00167	0	468.238	-0.166724	0.390421	0.506855		468.238	0.189591	0.323429	0.446686		468.238	-0.284538	0.14527	0.244115		468.238	0.0481359	0.80316	0.895718		468.238	0.0555759	0.768577	0.860736		468.238	0.0023269	0.99032	0.997584
NCU00168	0	711.183	0.678897	0.00940435	0.0217476		711.183	1.01005	0.000106405	0.000649527		711.183	0.665627	0.0109588	0.0321491		711.183	0.693462	0.00799204	0.0374568		711.183	0.936824	0.000303361	0.00205945		711.183	-0.391515	0.137634	0.404809
NCU00169	0	1123.75	-0.772392	0.000670681	0.00218165		1123.75	-0.770345	0.000687647	0.00318059		1123.75	-0.73617	0.00119409	0.0052935		1123.75	-0.851088	0.000181178	0.00177346		1123.75	-0.948308	2.60926e-05	0.000257978		1123.75	-0.645197	0.00435469	0.0484957
NCU00170	0	663.387	0.970818	0.00212193	0.00596318		663.387	0.764293	0.015639	0.0420801		663.387	0.869679	0.00596225	0.019775		663.387	0.176819	0.57779	0.75199		663.387	0.508941	0.106243	0.224286		663.387	-0.359062	0.259247	0.55773
NCU00171	0	633.654	-0.812631	0.0967063	0.160613		633.654	-0.929728	0.0574314	0.117808		633.654	-0.431345	0.37746	0.504669		633.654	-0.511563	0.295263	0.50175		633.654	-0.613121	0.208559	0.364679		633.654	-1.18125	0.0157844	0.112677
NCU00172	0	496.557	-0.863235	0.0650311	0.11418		496.557	-0.500066	0.284076	0.40434		496.557	-0.35263	0.450029	0.572264		496.557	-0.224103	0.630927	0.788528		496.557	-0.465246	0.317225	0.487729		496.557	-1.10249	0.0184093	0.12484
NCU00173	0	698.119	0.968575	0.000592241	0.00196179		698.119	0.702059	0.0129077	0.0357991		698.119	1.04517	0.000210056	0.0012272		698.119	0.512866	0.0700067	0.187254		698.119	0.838998	0.00278168	0.0129406		698.119	0.777067	0.00581663	0.0592133
NCU00175	0	1874.64	-5.33033	2.79379e-10	3.88576e-09	down	1874.64	-4.32305	2.79134e-07	3.7046e-06	down	1874.64	-4.98646	3.42523e-09	7.37197e-08	down	1874.64	-3.41199	4.89642e-05	0.000620372	down	1874.64	-5.35604	1.94218e-10	7.62974e-09	down	1874.64	-0.68629	0.413266	0.703936
NCU00176	0	46.6191	-6.38154	1.36606e-07	1.12659e-06	down	46.6191	-5.12434	1.98763e-08	3.37211e-07	down	46.6191	-5.6891	6.22056e-08	9.90695e-07	down	46.6191	-1.94461	0.00430056	0.0230135		46.6191	-3.49306	4.19449e-07	7.38548e-06	down	46.6191	0.114772	0.860041	0.944207
NCU00177	0	1976.79	1.80063	0.000226608	0.000855629		1976.79	1.55337	0.00146953	0.00597203		1976.79	1.90486	9.58641e-05	0.000629526		1976.79	0.84101	0.0852984	0.215554		1976.79	1.07993	0.0269651	0.0798473		1976.79	-0.0072459	0.98818	0.997164
NCU00178	0	105.306	-0.206872	0.345688	0.458796		105.306	0.13542	0.521341	0.636571		105.306	0.131084	0.540344	0.654171		105.306	-0.52494	0.0213375	0.0786678		105.306	-0.254746	0.204637	0.359142		105.306	0.0897229	0.666287	0.858911
NCU00180	0	87.6294	3.03959	6.51373e-15	2.05332e-13	up	87.6294	1.93973	9.72736e-07	1.11662e-05		87.6294	0.565225	0.176025	0.283145		87.6294	0.565682	0.174396	0.353822		87.6294	0.542241	0.173682	0.318897		87.6294	-0.03155	0.940508	0.978545
NCU00181	0	116.605	-0.555267	0.0697328	0.121104		116.605	-0.784231	0.0109828	0.0314164		116.605	-1.0143	0.00126383	0.00555495		116.605	-1.67114	3.49843e-07	9.61012e-06		116.605	-1.27859	2.15039e-05	0.000219991		116.605	-0.196515	0.511308	0.772723
NCU00182	0	641.25	-0.823673	0.0272107	0.0545067		641.25	-0.974021	0.0090492	0.0268229		641.25	-1.21017	0.00122314	0.00541009		641.25	-0.755081	0.0428586	0.131323		641.25	-0.827697	0.025701	0.0768767		641.25	-0.395573	0.287103	0.591923
NCU00183	0	302.248	0.280524	0.135102	0.211688		302.248	0.167289	0.373805	0.499581		302.248	-0.0883653	0.64528	0.743241		302.248	-0.0549874	0.773461	0.878892		302.248	-0.0282469	0.876899	0.928842		302.248	1.14224	2.90411e-10	6.43491e-08
NCU00184	0	145.186	-0.83776	0.000106231	0.000442037		145.186	-0.512406	0.0140604	0.0385006		145.186	-0.751264	0.000508119	0.00259761		145.186	-0.589554	0.00536946	0.0274598		145.186	-0.457758	0.0187042	0.0592143		145.186	0.17078	0.385829	0.685347
NCU00185	0	7.44806	-3.99586	0.0122696	0.0273802	down	7.44806	-1.75091	0.0702761	0.139151		7.44806	-1.89319	0.0623497	0.127424		7.44806	-1.63682	0.0899443	0.223738		7.44806	-1.01138	0.203224	0.357619		7.44806	1.24656	0.0960394	0.331608
NCU00186	0	34.2041	-0.792238	0.0612746	0.109022		34.2041	-0.247991	0.535059	0.649067		34.2041	-0.492355	0.234399	0.353196		34.2041	-0.93346	0.0305246	0.102059		34.2041	-0.820657	0.0330576	0.0941051		34.2041	0.379741	0.315962	0.621478
NCU00187	0	192.406	-0.116366	0.813058	0.878118		192.406	1.21116	0.0124619	0.0347042		192.406	1.90465	8.10863e-05	0.000545036		192.406	0.180076	0.71328	0.845476		192.406	0.582126	0.228479	0.389211		192.406	-0.868632	0.0801241	0.301252
NCU00188	0	774.4	-0.947304	8.03824e-12	1.44522e-10		774.4	-0.629111	3.83638e-06	3.66196e-05		774.4	-0.463409	0.000661715	0.00324038		774.4	-0.0625887	0.64041	0.793907		774.4	-0.412125	0.0017073	0.00867789		774.4	-0.0395333	0.765836	0.904434
NCU00189	0	1.64209	-0.254173	0.860966	0.913085		1.64209	-0.953031	0.545682	1		1.64209	-3.18355	0.0882179	1		1.64209	-0.807643	0.606208	1		1.64209	-2.99835	0.102677	1		1.64209	0.690025	0.596738	1
NCU00192	0	0.488577	4.80469	0.349358	0.462673		0.488577	0	1	1		0.488577	0	1	1		0.488577	0	1	1		0.488577	0	1	1		0.488577	0	1	1
NCU00193	0	231.651	1.08583	0.00292056	0.00788386		231.651	0.940874	0.00998331	0.029075		231.651	1.17383	0.00129408	0.00567377		231.651	0.735797	0.0447464	0.135618		231.651	0.836002	0.0209422	0.064791		231.651	-0.73202	0.0512782	0.230499
NCU00194	0	943.193	2.06001	0.00527848	0.01319	up	943.193	1.12845	0.126725	0.219631		943.193	2.33449	0.00156962	0.00666053	up	943.193	1.01021	0.171674	0.350063		943.193	1.3563	0.0662109	0.159205		943.193	-0.543477	0.46306	0.740332
NCU00195	0	499.095	2.12351	7.08519e-09	7.37213e-08	up	499.095	1.69359	4.04962e-06	3.86134e-05		499.095	2.5305	4.9539e-12	1.66492e-10	up	499.095	1.19262	0.00122692	0.00831368		499.095	1.36138	0.000201512	0.00145997		499.095	-0.0271272	0.941966	0.979156
NCU00196	0	466.294	-1.10429	0.00929902	0.021556		466.294	-0.958019	0.0238264	0.0586143		466.294	-0.79959	0.0592568	0.122206		466.294	-0.799323	0.0592454	0.166283		466.294	-0.804552	0.0562619	0.140918		466.294	-0.821926	0.0519868	0.232837
NCU00197	0	0.77095	-2.88914	0.399144	0.515845		0.77095	-2.95975	0.387742	1		0.77095	-1.38062	0.686569	1		0.77095	0.175967	0.956383	1		0.77095	-4.08309	0.233443	1		0.77095	-3.19266	0.351497	1
NCU00198	0	453.159	-0.0996811	0.679329	0.773528		453.159	-0.450369	0.0630798	0.127443		453.159	0.00239337	0.992079	0.995339		453.159	-0.741182	0.00241651	0.0145007		453.159	-0.430349	0.0713909	0.168318		453.159	-0.927009	0.000140731	0.00454383
NCU00199	0	674.209	0.469749	0.0282459	0.0562044		674.209	0.461644	0.0309585	0.072106		674.209	0.613397	0.00414551	0.0146686		674.209	0.0791124	0.713473	0.845476		674.209	0.257945	0.224061	0.384619		674.209	-0.315527	0.143502	0.414616
NCU00200	0	856.357	1.52036	9.74398e-07	6.60372e-06		856.357	1.33498	1.72671e-05	0.000136136		856.357	1.53576	7.61522e-07	9.1455e-06		856.357	0.993885	0.00141009	0.00931413		856.357	1.26161	4.61291e-05	0.000419913		856.357	0.298031	0.339551	0.644523
NCU00201	0	13.8425	0.0741254	0.886529	0.930006		13.8425	-1.16624	0.0539213	0.112382		13.8425	-0.197274	0.714783	0.798809		13.8425	-0.250336	0.642755	0.795013		13.8425	-0.0281632	0.953064	0.972625		13.8425	-1.28604	0.0304449	0.17151
NCU00202	0	1675.27	0.0787265	0.804963	0.872214		1675.27	0.429522	0.177427	0.284057		1675.27	0.351986	0.269324	0.393545		1675.27	0.554319	0.0817342	0.209679		1675.27	0.559527	0.0783474	0.180201		1675.27	-0.286095	0.369629	0.671948
NCU00203	0	599.909	-2.6938	1.99073e-29	2.84735e-27	down	599.909	-1.3979	7.27729e-10	1.66642e-08		599.909	-1.22051	7.38226e-08	1.13932e-06		599.909	-0.311166	0.162771	0.337194		599.909	-0.845748	0.000133263	0.00101457		599.909	-0.35837	0.10678	0.351874
NCU00204	0	261.508	0.569702	0.0640148	0.112762		261.508	0.0586902	0.849748	0.899189		261.508	0.144249	0.641915	0.740427		261.508	-0.0236888	0.939264	0.972532		261.508	-0.0169837	0.955665	0.973829		261.508	0.0875462	0.77652	0.910892
NCU00205	0	182.29	0.205735	0.498437	0.612846		182.29	0.756922	0.0114531	0.0325302		182.29	0.333397	0.272027	0.396578		182.29	0.311787	0.303845	0.510111		182.29	0.441148	0.13566	0.267299		182.29	0.135346	0.654008	0.853561
NCU00206	0	42.9276	0.0924471	0.857331	0.910349		42.9276	0.0937806	0.854879	0.902897		42.9276	1.06858	0.0323822	0.0764698		42.9276	0.157121	0.759599	0.871174		42.9276	-0.530427	0.292435	0.462155		42.9276	-0.330322	0.522864	0.782047
NCU00207	0	91.6328	-1.80306	1.64051e-07	1.32221e-06		91.6328	-2.45767	1.66961e-11	5.14206e-10	down	91.6328	-1.98015	1.98032e-08	3.56498e-07		91.6328	-1.54544	4.83431e-06	8.80658e-05		91.6328	-1.10493	0.000391593	0.00253204		91.6328	0.0250591	0.9355	0.976633
NCU00208	0	4.92105	4.32894	2.62352e-06	1.62352e-05	up	4.92105	1.46456	0.197944	0.308791		4.92105	3.62225	0.00013893	0.000869074	up	4.92105	0.56654	0.674054	0.81792		4.92105	2.24621	0.0187374	0.0592982		4.92105	-0.762416	0.647699	0.849946
NCU00209	0	465.78	-0.331461	0.0784811	0.134205		465.78	-0.43726	0.0204201	0.0519404		465.78	-0.473086	0.0126587	0.0361521		465.78	-0.368114	0.0511423	0.149303		465.78	-0.288742	0.115888	0.239684		465.78	-0.254966	0.171564	0.452466
NCU00210	0	370.069	0.77442	4.2575e-05	0.000197481		370.069	0.372277	0.0511836	0.107974		370.069	0.242785	0.20767	0.322261		370.069	-0.00377	0.984502	0.991838		370.069	0.18081	0.333477	0.503434		370.069	0.012536	0.94785	0.981319
NCU00211	0	311.104	0.619423	0.0176394	0.0375556		311.104	0.526983	0.0435846	0.0950101		311.104	0.632351	0.0155395	0.0426962		311.104	-0.101433	0.70237	0.839148		311.104	0.199426	0.440053	0.605673		311.104	0.0703164	0.788593	0.916798
NCU00212	0	5060.67	0.485283	0.0287955	0.0571674		5060.67	-0.292683	0.187828	0.296519		5060.67	-0.219297	0.323818	0.450585		5060.67	-0.140344	0.527648	0.711506		5060.67	-0.303139	0.171845	0.316907		5060.67	-0.280663	0.206394	0.495987
NCU00213	0	217.397	0.176309	0.248125	0.35112		217.397	0.125073	0.411876	0.536799		217.397	0.167957	0.275216	0.399972		217.397	0.0578844	0.708297	0.842575		217.397	0.130167	0.358462	0.528515		217.397	0.0571075	0.70406	0.878626
NCU00214	0	119.548	-0.0927829	0.665519	0.762725		119.548	0.235699	0.256091	0.374147		119.548	-0.0621499	0.773265	0.843814		119.548	0.22568	0.280912	0.484692		119.548	-0.00313873	0.98728	0.993575		119.548	0.0156218	0.939937	0.97838
NCU00215	0	272.707	0.281353	0.20194	0.296399		272.707	0.506195	0.0204516	0.0519713		272.707	0.470666	0.0321556	0.0760363		272.707	0.3308	0.13324	0.293739		272.707	0.516813	0.0153436	0.0507376		272.707	0.21434	0.327186	0.633564
NCU00216	0	1983.21	0.492132	0.0167756	0.0359563		1983.21	0.61126	0.00294687	0.0106197		1983.21	0.733683	0.000359405	0.00192883		1983.21	0.481864	0.0192207	0.0726274		1983.21	0.781515	0.000135413	0.00102916		1983.21	-0.317201	0.124388	0.382898
NCU00218	0	65.3315	0.730178	0.0064765	0.0157724		65.3315	0.587705	0.0293206	0.0690187		65.3315	0.280225	0.318482	0.444999		65.3315	0.191346	0.497202	0.687487		65.3315	0.181577	0.480769	0.63941		65.3315	0.394967	0.141795	0.411973
NCU00219	0	860.081	0.131177	0.43324	0.549463		860.081	0.471012	0.00458706	0.0152597		860.081	0.634392	0.000134174	0.000845308		860.081	0.267673	0.109032	0.255736		860.081	0.228016	0.165513	0.30884		860.081	-0.205452	0.220006	0.513264
NCU00220	0	88.0148	0.230004	0.295096	0.404277		88.0148	-0.375834	0.104204	0.18944		88.0148	-0.392712	0.0959326	0.17773		88.0148	-0.622091	0.00984463	0.0437522		88.0148	-0.459278	0.0300623	0.0874081		88.0148	0.0451647	0.835558	0.935569
NCU00221	0	9.83135	0.0402584	0.956019	0.975792		9.83135	-1.27316	0.147228	0.24731		9.83135	2.57139	3.82039e-05	0.000283055	up	9.83135	-1.91476	0.0617478	0.171255		9.83135	-1.13942	0.117968	0.242888		9.83135	-1.25032	0.136359	0.403047
NCU00222	0	443.447	-0.160112	0.184757	0.275055		443.447	-0.128025	0.285318	0.405781		443.447	0.129243	0.277259	0.401965		443.447	-0.532926	1.98771e-05	0.000289069		443.447	-0.279803	0.0137356	0.0464811		443.447	0.145379	0.210371	0.501886
NCU00223	0	458.841	0.280636	0.170645	0.257202		458.841	-0.0114684	0.95556	0.971916		458.841	0.129269	0.530024	0.644975		458.841	-0.457561	0.0284691	0.0967949		458.841	-0.26693	0.187932	0.337244		458.841	-0.0370626	0.85645	0.942713
NCU00224	0	0.11047	0	1	1		0.11047	0	1	1		0.11047	0	1	1		0.11047	0	1	1		0.11047	2.65814	0.606886	1		0.11047	0	1	1
NCU00225	0	7426.1	1.19514	0.00015541	0.000610117		7426.1	0.99418	0.00165471	0.00655692		7426.1	1.37561	1.3394e-05	0.000114496		7426.1	0.209453	0.507693	0.696207		7426.1	0.570022	0.0711824	0.167961		7426.1	-0.0387821	0.902373	0.963893
NCU00226	0	214.461	-1.03145	8.43413e-05	0.000361145		214.461	-0.39471	0.119742	0.210501		214.461	0.200446	0.42263	0.546624		214.461	-0.203626	0.420546	0.61936		214.461	-0.271197	0.269268	0.436563		214.461	0.0956021	0.700006	0.877017
NCU00227	0	511.256	3.06821	7.68539e-10	9.81988e-09	up	511.256	1.49134	0.00287685	0.0104344		511.256	2.14311	1.79263e-05	0.000147557	up	511.256	0.338448	0.501575	0.690993		511.256	0.602005	0.228577	0.389211		511.256	-0.149744	0.766511	0.904639
NCU00229	0	2.05845	-4.48995	0.00965679	0.0222722	down	2.05845	-2.11951	0.130982	0.225418		2.05845	-2.96992	0.0846071	0.161765		2.05845	-3.01478	0.081196	1		2.05845	-3.24308	0.0208424	0.0645953		2.05845	-1.06152	0.361787	1
NCU00230	0	865.573	-1.207	1.60858e-05	8.28765e-05		865.573	-0.881925	0.00155847	0.00625296		865.573	-0.754572	0.00680598	0.0219155		865.573	-0.628431	0.0240004	0.0856748		865.573	-0.833982	0.0025948	0.0122412		865.573	-0.472535	0.0886557	0.317655
NCU00231	0	4.23772	2.49917	0.0100266	0.0229924	up	4.23772	2.38669	0.014134	0.0386662	up	4.23772	0.89049	0.422174	0.546573		4.23772	0.508754	0.659958	0.808411		4.23772	0.277653	0.789005	0.874595		4.23772	0.187007	0.871325	0.949864
NCU00232	0	240.113	1.5297	6.05647e-05	0.000270958		240.113	0.803866	0.0360737	0.0815069		240.113	0.817381	0.0333227	0.078231		240.113	0.0318995	0.934504	0.969853		240.113	0.381879	0.316589	0.48726		240.113	-0.782323	0.0460921	0.217467
NCU00233	0	14.3788	-1.0459	0.20339	0.298026		14.3788	-1.53695	0.069303	0.137566		14.3788	-2.53961	0.00771756	0.0243627	down	14.3788	-0.997888	0.224375	0.419516		14.3788	-1.42314	0.0719833	0.169461		14.3788	-0.0274551	0.971863	0.991806
NCU00234	0	450.471	-1.27824	1.74169e-13	4.34652e-12		450.471	-1.08217	2.44821e-10	6.14765e-09		450.471	-1.11467	1.08471e-10	3.02454e-09		450.471	-0.454151	0.00653052	0.032024		450.471	-0.689918	2.16592e-05	0.000220814		450.471	0.0764626	0.638709	0.844681
NCU00236	0	449.595	-2.05827	4.12081e-14	1.13151e-12	down	449.595	-1.25053	2.56377e-06	2.58689e-05		449.595	-0.911642	0.000579874	0.00291387		449.595	-0.78173	0.00307751	0.0176006		449.595	-1.18624	5.71135e-06	6.99205e-05		449.595	-0.605718	0.0209286	0.135145
NCU00237	0	243.879	-0.409619	0.102184	0.168223		243.879	-0.504846	0.0442045	0.096004		243.879	-0.14858	0.550684	0.662515		243.879	0.35283	0.149671	0.31899		243.879	0.189835	0.429591	0.596287		243.879	-0.0916414	0.709071	0.88117
NCU00238	0	39.1691	0.492933	0.186204	0.276993		39.1691	-0.556187	0.160799	0.264449		39.1691	-1.08817	0.0102786	0.0305388		39.1691	-1.06174	0.011501	0.0490673		39.1691	-0.791929	0.0345001	0.0972004		39.1691	-0.912692	0.0227476	0.142459
NCU00239	0	736.88	-0.678176	0.00096831	0.00300107		736.88	-0.308925	0.129757	0.223615		736.88	-0.193015	0.344114	0.472301		736.88	-0.0452048	0.824115	0.9083		736.88	-0.266961	0.184819	0.333857		736.88	-0.238185	0.240701	0.536523
NCU00240	0	489.114	-0.424733	0.092828	0.155034		489.114	-0.54428	0.0314	0.0729769		489.114	-0.623423	0.0140808	0.0394487		489.114	-0.584947	0.0210234	0.0780083		489.114	-0.740212	0.00308845	0.0140498		489.114	-0.502004	0.0462851	0.217673
NCU00241	0	514.208	-0.788096	0.235302	0.335901		514.208	-1.32521	0.0462059	0.0994192		514.208	-1.31942	0.0472566	0.102252		514.208	-1.85844	0.00527447	0.0270539		514.208	-1.40729	0.033904	0.0958661		514.208	-1.73196	0.00921099	0.079108
NCU00242	0	794.836	-0.261314	0.0994181	0.164376		794.836	-0.592082	0.00020918	0.00115487		794.836	-0.531198	0.000908135	0.00420923		794.836	-0.201425	0.203721	0.394892		794.836	-0.409774	0.00850985	0.032017		794.836	0.0216231	0.890282	0.958397
NCU00243	0	1318.48	0.386197	0.0621978	0.110194		1318.48	0.194696	0.347593	0.472528		1318.48	0.274869	0.18508	0.294283		1318.48	0.37107	0.0732497	0.193241		1318.48	0.423939	0.0394373	0.107514		1318.48	-0.178939	0.388547	0.685905
NCU00244	0	366.032	-2.12485	0.00185279	0.00528117	down	366.032	-1.71257	0.0118781	0.0335005		366.032	-0.821009	0.226497	0.34381		366.032	-0.569144	0.401422	0.604114		366.032	-1.21909	0.0719742	0.169461		366.032	-2.05012	0.00261186	0.0353685	down
NCU00245	0	62.499	0.799539	0.00581704	0.0143672		62.499	0.634234	0.0297344	0.0697327		62.499	0.659124	0.0252059	0.0627415		62.499	0.42369	0.155973	0.32813		62.499	0.10013	0.722429	0.831074		62.499	-0.0878376	0.772088	0.907999
NCU00246	0	73.9602	-1.19301	0.023417	0.0479088		73.9602	-0.55267	0.282715	0.402986		73.9602	-1.30703	0.0138008	0.0387994		73.9602	0.239515	0.636736	0.791086		73.9602	-1.0625	0.0364323	0.101457		73.9602	-0.121007	0.811509	0.927357
NCU00247	0	53.5698	-2.39544	0.000304999	0.00110295	down	53.5698	-2.87226	2.09676e-05	0.000160739	down	53.5698	-4.04202	5.26543e-08	8.58693e-07	down	53.5698	-2.48356	0.000193947	0.00187302	down	53.5698	-2.8066	1.48554e-05	0.00015974	down	53.5698	-2.51209	0.000137756	0.0044812	down
NCU00248	0	240.791	-2.6221	6.38223e-09	6.68425e-08	down	240.791	-2.70076	2.24401e-09	4.63431e-08	down	240.791	-2.98019	6.89539e-11	1.98529e-09	down	240.791	-2.13667	1.80322e-06	3.91693e-05	down	240.791	-2.54954	8.55322e-09	2.31199e-07	down	240.791	-1.99742	6.9994e-06	0.000438883
NCU00249	0	201.614	0.951419	0.017408	0.0371215		201.614	-0.867059	0.0339585	0.0778018		201.614	-0.958525	0.0197346	0.051807		201.614	-0.548839	0.177614	0.35868		201.614	-0.693115	0.0842794	0.191061		201.614	-0.728937	0.0726267	0.282594
NCU00250	0	23.001	-0.589673	0.328947	0.441252		23.001	-1.60281	0.0118483	0.0334377		23.001	-1.54722	0.0158781	0.0434374		23.001	-2.12017	0.00158937	0.0103095	down	23.001	-2.04514	0.000821601	0.00468827	down	23.001	-2.64521	0.000112889	0.00390733	down
NCU00251	0	176.962	-0.436279	0.0639682	0.112727		176.962	-0.622904	0.00860328	0.0257865		176.962	-0.375276	0.111525	0.199353		176.962	-0.308961	0.187291	0.372643		176.962	-0.212565	0.342167	0.511486		176.962	-0.265559	0.248946	0.545857
NCU00252	0	41.0704	0.333235	0.345994	0.459042		41.0704	0.59659	0.0837386	0.159898		41.0704	-0.0386219	0.916574	0.94678		41.0704	-0.00725653	0.98416	0.991725		41.0704	-0.127587	0.704759	0.820408		41.0704	0.41586	0.226361	0.51974
NCU00253	0	132.318	0.359671	0.0911771	0.1527		132.318	0.328954	0.121407	0.212683		132.318	-0.0139204	0.949666	0.968512		132.318	-0.10496	0.635143	0.78998		132.318	0.215501	0.285948	0.454994		132.318	0.322013	0.12413	0.38265
NCU00254	0	0.0323408	0	1	1		0.0323408	0	1	1		0.0323408	0	1	1		0.0323408	0	1	1		0.0323408	0.984068	0.852546	1		0.0323408	0	1	1
NCU00257	0	105.164	0.832761	0.00018902	0.000728923		105.164	1.39626	5.94435e-11	1.67866e-09		105.164	1.10825	4.55524e-07	5.81006e-06		105.164	0.871145	9.29058e-05	0.00103865		105.164	0.801911	0.000112977	0.000886072		105.164	0.08594	0.711682	0.881966
NCU00258	0	10271.6	1.44473	8.40938e-05	0.000360408		10271.6	0.766966	0.0368597	0.0830071		10271.6	1.10686	0.00259109	0.0100538		10271.6	-0.00952427	0.979328	0.99101		10271.6	0.345675	0.346752	0.516331		10271.6	-0.0450668	0.902403	0.963893
NCU00259	0	44.3738	0.541603	0.0559868	0.100945		44.3738	-0.350245	0.258118	0.376176		44.3738	-1.05221	0.00293177	0.0111314		44.3738	-0.198673	0.518459	0.704497		44.3738	-0.250241	0.362046	0.532024		44.3738	0.403721	0.148582	0.421121
NCU00260	0	1051.14	-3.47376	7.88217e-12	1.41983e-10	down	1051.14	-2.55793	3.76751e-07	4.84731e-06	down	1051.14	-2.5213	5.61675e-07	6.94356e-06	down	1051.14	-2.40287	1.80522e-06	3.91693e-05	down	1051.14	-1.83482	0.000244874	0.00171781		1051.14	1.02105	0.0408808	0.202834
NCU00261	0	842.263	1.69957	9.0759e-11	1.37183e-09		842.263	0.933939	0.000385052	0.0019594		842.263	0.927819	0.000426023	0.00223479		842.263	-0.0487805	0.854246	0.925066		842.263	0.0151889	0.953907	0.97295		842.263	-0.645473	0.0154274	0.110675
NCU00262	0	61.3859	-0.884281	0.00487277	0.0122916		61.3859	-0.961678	0.00221829	0.00836497		61.3859	-0.672079	0.0301891	0.072256		61.3859	-0.134881	0.647388	0.798325		61.3859	-0.428182	0.126217	0.254746		61.3859	-0.954024	0.00188253	0.0287801
NCU00263	0	704.268	0.980559	0.026419	0.0532325		704.268	0.129127	0.770479	0.838702		704.268	0.037137	0.93319	0.956899		704.268	-0.0182801	0.967085	0.986581		704.268	-0.223145	0.613426	0.749941		704.268	0.172215	0.696956	0.874796
NCU00264	0	129.181	1.33676	0.0366807	0.0704008		129.181	0.591703	0.357243	0.482603		129.181	0.904526	0.158792	0.261536		129.181	0.621849	0.333543	0.541086		129.181	0.624802	0.327762	0.497829		129.181	-0.0707418	0.912715	0.967503
NCU00265	0	1450.42	3.065	3.88918e-06	2.33815e-05	up	1450.42	1.68533	0.0111723	0.0318966		1450.42	2.05128	0.00201076	0.00816028	up	1450.42	1.07218	0.106721	0.252122		1450.42	2.40018	0.000298987	0.00203496	up	1450.42	0.402829	0.544656	0.794946
NCU00267	0	21.9655	1.71405	0.00288452	0.00779756		21.9655	3.04032	2.88138e-08	4.72515e-07	up	21.9655	2.10512	0.000204698	0.00120221	up	21.9655	0.24768	0.702603	0.839148		21.9655	0.614127	0.283467	0.452513		21.9655	-0.655898	0.347965	0.651578
NCU00268	0	271.082	-0.316286	0.298689	0.407856		271.082	-0.546257	0.0737569	0.144586		271.082	-0.337344	0.268822	0.393006		271.082	0.0505027	0.867324	0.933336		271.082	-0.0622101	0.834719	0.90451		271.082	0.380531	0.203828	0.493246
NCU00269	0	159.036	0.82531	0.112187	0.181664		159.036	-0.0942412	0.857048	0.904533		159.036	0.0055941	0.991473	0.994963		159.036	-0.578054	0.272815	0.476422		159.036	-0.380238	0.464316	0.625719		159.036	-0.757516	0.149785	0.422884
NCU00270	0	541.452	-1.43621	7.71997e-08	6.7072e-07		541.452	-1.02944	0.000104117	0.000638647		541.452	-2.10715	9.72174e-15	5.30435e-13	down	541.452	-1.1455	1.66915e-05	0.00024945		541.452	-1.0678	4.74964e-05	0.000429704		541.452	-1.04184	8.19669e-05	0.00314986
NCU00271	0	0.115597	1.55876	0.768304	0.844051		0.115597	-0.0162786	0.99755	1		0.115597	0.13876	0.979116	1		0.115597	0.083671	0.987406	1		0.115597	-1.13961	0.829774	1		0.115597	-0.249186	0.962505	1
NCU00272	0	439.442	-0.293859	0.0975182	0.161821		439.442	-0.209317	0.235179	0.352092		439.442	-0.203552	0.250944	0.372788		439.442	-0.0473619	0.787749	0.886743		439.442	-0.110225	0.519191	0.672893		439.442	0.240502	0.164034	0.441626
NCU00273	0	656.491	0.363192	0.042276	0.0795125		656.491	0.492714	0.00568294	0.0183193		656.491	0.564902	0.00154532	0.00657634		656.491	0.194093	0.279883	0.483287		656.491	0.300621	0.0875041	0.195711		656.491	-0.102628	0.567448	0.804939
NCU00274	0	407.256	-1.02174	9.74798e-06	5.30465e-05		407.256	-0.469442	0.038558	0.0860643		407.256	-0.826643	0.000328583	0.00177962		407.256	0.117675	0.600428	0.768339		407.256	-0.301283	0.175297	0.32093		407.256	-0.473404	0.0359994	0.18816
NCU00275	0	212.628	-1.78362	2.61589e-10	3.65958e-09		212.628	-1.79709	1.69164e-10	4.39777e-09		212.628	-1.01255	0.00021325	0.0012385		212.628	-0.848314	0.00177256	0.0112642		212.628	-1.03388	9.47305e-05	0.000768892		212.628	-0.829481	0.0020179	0.0300015
NCU00276	0	275.582	-0.641258	0.26588	0.371797		275.582	-0.319567	0.578622	0.686225		275.582	-1.07854	0.0621137	0.127059		275.582	-1.2464	0.031237	0.103919		275.582	-1.57799	0.006125	0.0246984		275.582	-1.76878	0.00227305	0.032209
NCU00277	0	219.577	0.309198	0.0693371	0.120547		219.577	1.44618	4.9233e-20	5.11965e-18		219.577	1.13624	1.9783e-12	7.13721e-11		219.577	0.351699	0.0386135	0.121676		219.577	0.451901	0.00398242	0.0173487		219.577	-0.371767	0.0351444	0.185685
NCU00278	0	690.086	-0.025136	0.895575	0.936641		690.086	0.734278	0.000102068	0.000629134		690.086	0.162624	0.394796	0.521848		690.086	0.137496	0.471584	0.664272		690.086	0.141813	0.450548	0.615041		690.086	-0.170703	0.371245	0.673175
NCU00279	0	27.7957	1.2273	0.000132583	0.000532721		27.7957	0.69092	0.0400205	0.0886348		27.7957	0.473833	0.178303	0.28577		27.7957	-0.458506	0.256735	0.457858		27.7957	0.298545	0.342025	0.51136		27.7957	-0.300429	0.419341	0.708703
NCU00280	0	321.5	-0.314821	0.0330524	0.0643129		321.5	0.200058	0.155326	0.257266		321.5	0.158306	0.267714	0.391646		321.5	0.431336	0.00199226	0.0124379		321.5	0.432464	0.00103912	0.00570113		321.5	0.48725	0.000354617	0.00921375
NCU00281	0	428.639	-2.72086	3.57803e-16	1.329e-14	down	428.639	-1.11113	0.000546891	0.00264296		428.639	-1.2123	0.000170856	0.0010358		428.639	-0.576375	0.0716238	0.190052		428.639	-1.13768	0.000352606	0.00231724		428.639	-1.57612	1.01742e-06	8.82139e-05
NCU00282	0	226.387	-1.14296	0.00204978	0.00577906		226.387	-0.585947	0.109908	0.197374		226.387	-1.56512	3.10272e-05	0.000237035		226.387	-0.947346	0.0103374	0.0452806		226.387	-1.13702	0.00178456	0.00899302		226.387	-0.127807	0.72517	0.887838
NCU00283	0	250.612	-1.6572	8.9643e-07	6.15364e-06		250.612	-1.21418	0.000258377	0.00138917		250.612	-0.290649	0.374616	0.502235		250.612	-1.60575	1.89456e-06	4.06612e-05		250.612	-1.37556	2.51832e-05	0.000250929		250.612	-0.0181966	0.955318	0.984016
NCU00284	0	19.4821	0.252676	0.590822	0.699685		19.4821	0.366581	0.427637	0.552315		19.4821	0.103473	0.829769	0.886538		19.4821	0.0496648	0.917796	0.962279		19.4821	-0.218999	0.621563	0.75602		19.4821	0.0156703	0.973234	0.992019
NCU00285	0	394.433	-0.707189	0.108265	0.176567		394.433	-0.555147	0.206685	0.319108		394.433	-0.439782	0.317271	0.443938		394.433	-0.943733	0.0324799	0.106741		394.433	-0.765393	0.0803191	0.183685		394.433	0.0289535	0.947272	0.981319
NCU00287	0	297.982	-1.79329	9.60862e-05	0.000405279		297.982	-1.55274	0.000698662	0.00321975		297.982	-1.64039	0.000355569	0.00191056		297.982	-0.871141	0.0558297	0.159227		297.982	-1.40582	0.00194236	0.00962902		297.982	-1.32014	0.00378778	0.0445321
NCU00288	0	9.41134	-3.7132	0.00108198	0.00330632	down	9.41134	-0.545141	0.363963	0.489288		9.41134	-0.622412	0.312522	0.438723		9.41134	-2.10274	0.00655903	0.0320961	down	9.41134	-1.81301	0.00296097	0.0136171		9.41134	-1.20775	0.0558146	0.241845
NCU00289	0	644.213	-2.54266	8.87524e-20	5.383e-18	down	644.213	-1.16987	1.59935e-05	0.000128282		644.213	-0.848166	0.00172237	0.00716764		644.213	-0.69165	0.0104196	0.0455358		644.213	-1.04463	9.88831e-05	0.000794571		644.213	-1.34509	6.89193e-07	6.27746e-05
NCU00290	0	27.2541	1.26649	0.120568	0.192534		27.2541	1.08049	0.18758	0.296339		27.2541	3.24561	3.14135e-05	0.000239675	up	27.2541	3.29655	2.2997e-05	0.000325152	up	27.2541	2.0542	0.00835497	0.0315731	up	27.2541	-0.75746	0.410422	0.701577
NCU00291	0	195.253	0.341348	0.365347	0.479868		195.253	-0.112458	0.766803	0.835693		195.253	-0.174222	0.647161	0.745116		195.253	-0.0559518	0.882774	0.942112		195.253	0.128901	0.730119	0.835624		195.253	-1.06048	0.00586772	0.0595779
NCU00292	0	31.9126	-1.30526	0.079422	0.135717		31.9126	-1.48454	0.047	0.100784		31.9126	-1.73434	0.0227233	0.0578656		31.9126	-1.67116	0.027234	0.0933291		31.9126	-1.76387	0.0153651	0.05079		31.9126	-0.0599232	0.933382	0.9759
NCU00293	0	293.822	0.731725	0.0769434	0.131858		293.822	0.653137	0.114433	0.203392		293.822	1.83418	8.07412e-06	7.31693e-05		293.822	0.468124	0.259221	0.460867		293.822	0.980789	0.0168221	0.0545253		293.822	-0.429773	0.303979	0.60817
NCU00294	0	20336.4	1.40186	1.02018e-05	5.52962e-05		20336.4	0.641393	0.0435095	0.0948879		20336.4	1.05001	0.000949536	0.00436905		20336.4	0.202115	0.524729	0.709118		20336.4	0.438214	0.167749	0.311565		20336.4	-0.080403	0.800238	0.92294
NCU00295	0	727.736	-0.968488	0.0208942	0.0434054		727.736	-0.452448	0.279298	0.399727		727.736	-1.00555	0.0165454	0.0449844		727.736	-0.490946	0.24065	0.440254		727.736	-0.210242	0.614023	0.750256		727.736	-0.609432	0.144929	0.416674
NCU00296	0	15.5928	3.59842	2.70481e-07	2.08195e-06	up	15.5928	1.43087	0.0598626	0.12189		15.5928	0.721061	0.379371	0.506535		15.5928	1.53286	0.0437483	0.133247		15.5928	2.96862	1.86055e-05	0.00019439	up	15.5928	-0.38959	0.664993	0.858083
NCU00297	0	1.96226	-2.98171	0.167329	0.25304		1.96226	-0.686216	0.72055	0.802538		1.96226	-1.46693	0.495044	0.613272		1.96226	1.47338	0.382371	1		1.96226	0.924554	0.57697	0.721518		1.96226	-0.278546	0.87788	1
NCU00298	0	20.1316	0.274124	0.659746	0.758711		20.1316	-0.517172	0.439169	0.563072		20.1316	1.99217	0.000481659	0.00248244		20.1316	0.8352	0.163604	0.338434		20.1316	1.38685	0.0134365	0.0457493		20.1316	-0.367463	0.566915	0.804711
NCU00299	0	47.0063	-0.780355	0.0706493	0.122562		47.0063	-0.799083	0.0628785	0.127182		47.0063	0.0651347	0.87268	0.917197		47.0063	-0.0216187	0.957665	0.981838		47.0063	0.501353	0.186513	0.335761		47.0063	0.827789	0.0316893	0.175324
NCU00300	0	134.276	-0.538177	0.0145142	0.0316472		134.276	-0.966107	2.3338e-05	0.000176916		134.276	0.143706	0.493516	0.611722		134.276	-0.329344	0.128505	0.286438		134.276	-0.375801	0.0619254	0.15179		134.276	0.3457	0.0883515	0.317222
NCU00301	0	188.317	0.787662	0.202705	0.29734		188.317	-0.209333	0.736017	0.813424		188.317	0.0164454	0.978861	0.987826		188.317	-1.24475	0.0472531	0.140945		188.317	-1.02658	0.0977009	0.211157		188.317	-1.67246	0.00776223	0.0713021
NCU00302	0	208.166	0.12892	0.527734	0.641054		208.166	0.240971	0.23373	0.350397		208.166	0.0304083	0.882765	0.92287		208.166	-0.133935	0.518705	0.704497		208.166	0.145976	0.454857	0.618726		208.166	0.068433	0.734511	0.890412
NCU00303	0	176.252	1.70465	0.000900439	0.00281898		176.252	0.482082	0.351528	0.476437		176.252	0.484316	0.350033	0.478032		176.252	0.359627	0.488053	0.68038		176.252	0.627824	0.221211	0.381444		176.252	-1.01833	0.0535508	0.236055
NCU00304	0	697.452	-0.710917	5.96211e-05	0.000266861		697.452	0.0286895	0.867737	0.911726		697.452	-0.266697	0.126705	0.219472		697.452	0.683736	5.86792e-05	0.000718753		697.452	0.939773	1.92988e-08	4.88775e-07		697.452	0.926891	3.91478e-08	4.98155e-06
NCU00305	0	108.45	-0.400519	0.314676	0.425743		108.45	0.103852	0.790148	0.854222		108.45	-0.418767	0.29531	0.421483		108.45	0.732068	0.0572556	0.16217		108.45	0.899966	0.0171783	0.0553285		108.45	0.460497	0.231117	0.524819
NCU00306	0	879.927	-4.63038	3.82118e-12	7.45792e-11	down	879.927	-2.49527	0.000150738	0.000870265	down	879.927	-3.94277	2.76004e-09	6.09901e-08	down	879.927	-1.34272	0.0410375	0.127275		879.927	-2.5348	0.000114697	0.00089559	down	879.927	-2.75948	2.7793e-05	0.00129996	down
NCU00307	0	0.209843	0.508889	0.923161	0.953201		0.209843	-0.981013	0.852607	1		0.209843	-0.825974	0.875694	1		0.209843	-0.881064	0.867477	1		0.209843	-0.702001	0.894105	1		0.209843	-1.21392	0.818167	1
NCU00308	0	96.3949	-1.28651	0.000153563	0.00060435		96.3949	-1.68262	1.24492e-06	1.3772e-05		96.3949	-2.24168	1.20337e-09	2.80649e-08	down	96.3949	-0.845802	0.0110188	0.0474828		96.3949	-1.09604	0.000660468	0.0039121		96.3949	-0.832608	0.0111455	0.0898469
NCU00309	0	924.01	1.04005	0.0462438	0.0857497		924.01	0.82815	0.112548	0.200931		924.01	-0.269939	0.605739	0.70925		924.01	-0.568727	0.277135	0.481053		924.01	-0.270608	0.604086	0.742115		924.01	-2.33157	9.70441e-06	0.000563572	down
NCU00310	0	77.2954	0.703706	0.0152506	0.0330051		77.2954	0.49488	0.090663	0.170215		77.2954	0.876066	0.00239879	0.00948149		77.2954	0.260373	0.384359	0.589377		77.2954	0.815473	0.00303789	0.0138841		77.2954	-0.535634	0.0855172	0.311309
NCU00311	0	1552.53	0.0723347	0.526114	0.639573		1552.53	0.0648652	0.569184	0.678151		1552.53	-0.0228235	0.842138	0.894704		1552.53	0.0757909	0.506777	0.695604		1552.53	0.129	0.24899	0.412526		1552.53	0.0724569	0.522807	0.782047
NCU00312	0	49.2583	3.12358	4.55751e-16	1.67336e-14	up	49.2583	2.05389	2.02358e-07	2.77309e-06	up	49.2583	-1.31635	0.0219396	0.0562426		49.2583	1.21952	0.00320573	0.0181896		49.2583	1.59426	3.86486e-05	0.000358463		49.2583	-1.18159	0.023509	0.145199
NCU00313	0	0.355166	-0.322661	0.950972	0.972382		0.355166	-1.81259	0.729989	1		0.355166	-1.65755	0.752292	1		0.355166	-1.71264	0.744342	1		0.355166	-0.364415	0.943517	1		0.355166	-2.0455	0.696914	1
NCU00314	0	23.9376	-2.36484	0.00135754	0.00401894	down	23.9376	-2.8121	0.000240123	0.00129893	down	23.9376	-2.73521	0.000396555	0.00210267	down	23.9376	-1.79389	0.0113107	0.0483811		23.9376	-1.86391	0.0054282	0.0222955		23.9376	-0.378568	0.565913	0.80408
NCU00315	0	6655.03	1.08344	0.000285194	0.00104234		6655.03	0.335004	0.262089	0.380675		6655.03	0.653182	0.0287529	0.069477		6655.03	-0.255647	0.392402	0.596216		6655.03	0.0661006	0.824794	0.898625		6655.03	-0.275806	0.356002	0.658645
NCU00316	0	263.55	-0.112502	0.557699	0.668388		263.55	-0.259326	0.17848	0.285381		263.55	0.164479	0.386624	0.513427		263.55	0.212699	0.260532	0.462247		263.55	0.242897	0.18106	0.328758		263.55	0.262703	0.158059	0.433221
NCU00317	0	231.59	-0.656836	0.316037	0.427404		231.59	-0.564022	0.388859	0.513387		231.59	-0.022982	0.971943	0.983177		231.59	-0.486831	0.457062	0.651404		231.59	-0.466268	0.474415	0.633724		231.59	-1.79817	0.00638206	0.0628487
NCU00318	0	4.81074	3.0942	0.00062736	0.0020582	up	4.81074	-0.119223	0.920862	0.945903		4.81074	1.30189	0.199803	0.312301		4.81074	1.21335	0.233658	0.431557		4.81074	1.4126	0.125686	0.254336		4.81074	-0.946741	0.480131	0.750792
NCU00319	0	23.1769	2.12828	0.000132098	0.000531787	up	23.1769	0.696516	0.234806	0.351725		23.1769	0.56385	0.344493	0.47264		23.1769	0.152239	0.803557	0.895877		23.1769	0.52818	0.348214	0.518071		23.1769	-0.448727	0.473665	0.746561
NCU00320	0	780.8	0.400811	0.190722	0.28253		780.8	0.200252	0.513596	0.630161		780.8	0.00819332	0.978724	0.987826		780.8	0.126128	0.681055	0.823644		780.8	0.0416353	0.891531	0.937908		780.8	-0.0197756	0.948559	0.981438
NCU00321	0	732.29	0.0531495	0.76803	0.844051		732.29	0.0712562	0.692104	0.779149		732.29	-0.736161	6.24169e-05	0.000430345		732.29	-0.152589	0.399163	0.602174		732.29	-0.313285	0.0788074	0.181071		732.29	-0.264334	0.142501	0.413086
NCU00322	0	1544.9	0.599213	0.253997	0.357791		1544.9	0.261263	0.619003	0.71916		1544.9	0.0710703	0.89243	0.930413		1544.9	-1.18211	0.0247455	0.0876115		1544.9	-1.12627	0.0320987	0.0918486		1544.9	-3.54769	2.4714e-11	7.12835e-09	down
NCU00324	0	449.918	0.12781	0.556968	0.667763		449.918	-0.0894627	0.681976	0.771533		449.918	0.0947182	0.66417	0.758182		449.918	0.0117479	0.957082	0.981584		449.918	0.0742176	0.728697	0.834645		449.918	0.25692	0.234022	0.529019
NCU00325	0	139.656	0.0813843	0.685078	0.778317		139.656	-0.0971071	0.631372	0.729312		139.656	-0.319467	0.126818	0.21962		139.656	-0.0521835	0.797394	0.892491		139.656	-0.0674574	0.721276	0.830461		139.656	-0.0377883	0.848677	0.939921
NCU00326	0	883.613	0.349294	0.0959804	0.159618		883.613	0.886884	2.10112e-05	0.000160934		883.613	0.628066	0.00269736	0.0103706		883.613	0.613633	0.00336026	0.0189053		883.613	0.801935	0.000108355	0.000855132		883.613	-0.101936	0.627797	0.839359
NCU00327	0	1.94361	-4.03613	0.0378972	0.0723443		1.94361	-1.66398	0.31473	0.436582		1.94361	-0.196296	0.892704	0.930494		1.94361	-2.56794	0.185623	1		1.94361	-2.28406	0.143151	0.278152		1.94361	-1.25371	0.41498	1
NCU00329	0	135.539	0.594208	0.304961	0.414942		135.539	-0.0211568	0.971093	0.982152		135.539	1.55473	0.00682152	0.0219336		135.539	1.33582	0.0202397	0.0756332		135.539	1.07134	0.0612317	0.150383		135.539	0.951426	0.09832	0.335348
NCU00330	0	85.7267	-0.363783	0.318328	0.429653		85.7267	-1.1867	0.00182669	0.0071016		85.7267	-0.462971	0.208117	0.322727		85.7267	-0.362883	0.320138	0.527549		85.7267	-0.221134	0.527186	0.67927		85.7267	0.430208	0.220976	0.514423
NCU00331	0	37.2272	1.69235	9.94919e-06	5.39882e-05		37.2272	0.536067	0.185835	0.294478		37.2272	0.646996	0.111385	0.199299		37.2272	-0.0166739	0.968907	0.987625		37.2272	0.159052	0.682184	0.803338		37.2272	-0.671074	0.129497	0.392481
NCU00332	0	1075.93	-2.35134	1.21066e-12	2.58337e-11	down	1075.93	-1.41394	1.60729e-05	0.000128514		1075.93	-1.47483	7.04626e-06	6.4877e-05		1075.93	-0.768464	0.0186948	0.0711904		1075.93	-1.0719	0.00100043	0.00550952		1075.93	0.273211	0.401197	0.694596
NCU00333	0	81.686	-0.755812	0.00241313	0.0066681		81.686	0.00295565	0.989543	0.994607		81.686	-0.106917	0.644708	0.742775		81.686	-0.260433	0.266708	0.469357		81.686	0.0334333	0.871789	0.925767		81.686	-0.0743051	0.738087	0.891977
NCU00334	0	190.286	0.60308	0.000545308	0.00183579		190.286	0.597243	0.000585017	0.0027921		190.286	0.366129	0.0404207	0.0905254		190.286	0.347833	0.0508381	0.148565		190.286	0.546403	0.000917311	0.00510956		190.286	0.181091	0.303224	0.607502
NCU00335	0	270.528	0.0759045	0.749317	0.829372		270.528	0.00617834	0.979251	0.987857		270.528	-0.0672965	0.778524	0.84816		270.528	0.0380475	0.873	0.936188		270.528	0.144081	0.533726	0.684008		270.528	0.0547941	0.816189	0.928501
NCU00336	0	234.953	1.78849	0.00572823	0.0141661		234.953	0.914191	0.158742	0.261873		234.953	1.0907	0.0926518	0.173359		234.953	-0.63488	0.332694	0.540303		234.953	-0.37321	0.565291	0.71116		234.953	-1.37147	0.0373002	0.192633
NCU00337	0	97.1891	1.76431	0.00204259	0.00576047		97.1891	1.13957	0.0473331	0.101327		97.1891	1.06314	0.0648887	0.131398		97.1891	-0.55272	0.351534	0.558448		97.1891	-0.186001	0.746651	0.848066		97.1891	-0.934345	0.115861	0.367625
NCU00338	0	75.7045	-1.25734	0.00045286	0.0015667		75.7045	-1.15377	0.00112554	0.00477074		75.7045	-1.94853	3.99843e-07	5.15943e-06		75.7045	-0.373446	0.273759	0.4773		75.7045	-1.29953	0.000116094	0.000905696		75.7045	-0.397404	0.238296	0.534467
NCU00339	0	0.172636	0	1	1		0.172636	0	1	1		0.172636	3.3042	0.525283	1		0.172636	0	1	1		0.172636	0	1	1		0.172636	0	1	1
NCU00340	0	1793.92	0.0219767	0.913723	0.946542		1793.92	-0.441004	0.0300882	0.0704875		1793.92	-0.464291	0.0225757	0.0575659		1793.92	-0.254429	0.210538	0.403385		1793.92	-0.358027	0.0765867	0.177305		1793.92	-0.6781	0.000853121	0.0169313
NCU00343	0	0.164902	-0.974056	0.853564	0.90825		0.164902	-1.04465	0.843098	1		0.164902	-0.889607	0.866146	1		0.164902	-0.944696	0.857942	1		0.164902	-0.765625	0.884521	1		0.164902	-1.27755	0.808733	1
NCU00344	0	230.662	-0.0416279	0.791088	0.860792		230.662	0.0244465	0.874976	0.91516		230.662	-0.00600149	0.969666	0.981899		230.662	0.167406	0.279555	0.48327		230.662	0.137674	0.340915	0.510664		230.662	-0.0115701	0.939733	0.978285
NCU00345	0	171.745	-0.77419	0.000215669	0.000819165		171.745	-0.278023	0.163509	0.267988		171.745	-0.772977	0.000248477	0.00140698		171.745	0.0685922	0.726658	0.852464		171.745	-0.106189	0.569807	0.715338		171.745	0.375817	0.0476482	0.221615
NCU00346	0	137.556	0.196912	0.524837	0.638831		137.556	0.139172	0.653013	0.747182		137.556	-0.0279264	0.928888	0.954036		137.556	-0.115563	0.712227	0.845275		137.556	0.0275928	0.927347	0.958244		137.556	-0.434506	0.16528	0.442625
NCU00347	0	310.892	-0.178464	0.343571	0.456649		310.892	-0.598529	0.00176886	0.00693655		310.892	-0.426067	0.0258919	0.0639806		310.892	-0.458495	0.0163881	0.0647594		310.892	-0.572539	0.00182904	0.00915972		310.892	0.0406958	0.825943	0.932132
NCU00348	0	213.125	-0.440515	0.0328698	0.0640617		213.125	-0.465393	0.0238494	0.0586384		213.125	-0.373347	0.0708227	0.140706		213.125	-1.05815	9.17265e-07	2.19435e-05		213.125	-0.767472	0.000114011	0.000891022		213.125	-0.00537511	0.978532	0.993637
NCU00349	0	152.858	-0.986289	9.49181e-05	0.000401002		152.858	-0.906867	0.000290697	0.00154045		152.858	-1.43864	4.7795e-08	7.92609e-07		152.858	-0.443238	0.0706658	0.188203		152.858	-0.913233	0.000123833	0.000955992		152.858	-0.0116306	0.960995	0.98665
NCU00350	0	623.292	0.34481	0.00185134	0.0052789		623.292	0.202015	0.0693512	0.137566		623.292	0.290152	0.00936677	0.0284121		623.292	0.125478	0.264423	0.466758		623.292	0.424191	5.67284e-05	0.000498928		623.292	0.312994	0.00415701	0.0472676
NCU00351	0	204.383	-0.435359	0.088943	0.149506		204.383	-0.441873	0.0834854	0.159552		204.383	-0.673793	0.00949414	0.0287491		204.383	0.12696	0.613165	0.777851		204.383	-0.171848	0.48475	0.643252		204.383	-0.0581535	0.816122	0.928501
NCU00352	0	808.106	-0.87242	0.00252866	0.00693933		808.106	-1.06316	0.000236772	0.00128316		808.106	-0.942765	0.00111839	0.00500527		808.106	-0.842895	0.00352587	0.019595		808.106	-0.954635	0.000880322	0.00494671		808.106	-0.588153	0.0409319	0.202854
NCU00353	0	1.46662	-2.79459	0.170912	0.257484		1.46662	-2.86517	0.160368	1		1.46662	-1.25194	0.536637	1		1.46662	-2.76522	0.175461	1		1.46662	0.458346	0.764671	1		1.46662	1.7172	0.256002	1
NCU00354	0	0.252423	-0.791089	0.880996	0.926738		0.252423	-0.861694	0.870476	1		0.252423	-0.706655	0.893627	1		0.252423	1.65601	0.749533	1		0.252423	-1.98502	0.707203	1		0.252423	-1.0946	0.835912	1
NCU00355	0	1483.11	0.547226	0.523939	0.63798		1483.11	1.28171	0.135424	0.231709		1483.11	0.410529	0.632622	0.731747		1483.11	1.15618	0.178066	0.359329		1483.11	0.559363	0.514624	0.668739		1483.11	0.127288	0.882163	0.954977
NCU00356	0	450.111	-2.59884	8.70081e-18	4.04756e-16	down	450.111	-1.77258	1.67131e-09	3.55112e-08		450.111	-1.77803	1.72288e-09	3.89478e-08		450.111	-0.689752	0.0170498	0.0665758		450.111	-1.11314	0.000104811	0.000830129		450.111	-0.0727657	0.799615	0.922789
NCU00357	0	575.314	-0.0444269	0.867232	0.917091		575.314	-0.520717	0.0511346	0.107929		575.314	-0.215253	0.419227	0.543894		575.314	-1.0178	0.000159085	0.0015914		575.314	-0.76595	0.00380787	0.0167618		575.314	0.0085331	0.974305	0.992019
NCU00358	0	134.867	0.46617	0.095692	0.159287		134.867	-0.0826547	0.772431	0.840516		134.867	1.1523	2.69464e-05	0.000209113		134.867	0.140064	0.621941	0.78348		134.867	0.087566	0.748482	0.848946		134.867	-0.438403	0.127481	0.389454
NCU00359	0	222.243	-0.3273	0.203037	0.297691		222.243	-0.666763	0.0101845	0.0295167		222.243	-0.314518	0.222289	0.338516		222.243	-0.77456	0.00306486	0.0175514		222.243	-0.560075	0.0259379	0.0774543		222.243	-0.526937	0.0398088	0.199806
NCU00360	0	633.028	-1.17099	8.36107e-08	7.2249e-07		633.028	-1.04097	1.72272e-06	1.83459e-05		633.028	-1.21941	2.63937e-08	4.64728e-07		633.028	-1.0585	1.21562e-06	2.80662e-05		633.028	-1.09521	3.26157e-07	5.89551e-06		633.028	-0.501643	0.0196851	0.130326
NCU00361	0	27.9669	3.65506	0.130789	0.206076		27.9669	0.89654	0.712909	0.796436		27.9669	3.36874	0.163903	0.267987		27.9669	1.48265	0.541863	0.723237		27.9669	1.08967	0.653068	0.780106		27.9669	-0.448915	0.855226	0.942469
NCU00362	0	45.1488	-0.664248	0.19423	0.28653		45.1488	-0.445886	0.376878	0.502447		45.1488	-0.80377	0.120883	0.211791		45.1488	-0.435788	0.38966	0.594118		45.1488	-0.468661	0.335819	0.505933		45.1488	0.444111	0.361481	0.663661
NCU00363	0	42.8312	-0.910699	0.0662888	0.116133		42.8312	-1.88429	0.000519398	0.00253364		42.8312	-0.00911425	0.984554	0.990944		42.8312	0.746953	0.101372	0.24332		42.8312	-0.0553948	0.902229	0.943902		42.8312	0.185169	0.686896	0.868329
NCU00364	0	168.572	0.825028	0.000506846	0.00172605		168.572	0.654384	0.00602077	0.0192469		168.572	0.413288	0.088533	0.167174		168.572	0.631768	0.00833379	0.0386868		168.572	0.635755	0.00582124	0.0236897		168.572	0.398093	0.0950367	0.329999
NCU00365	0	216.907	1.19441	8.6306e-08	7.44438e-07		216.907	0.568503	0.012412	0.0346086		216.907	1.16363	2.01612e-07	2.8197e-06		216.907	0.514437	0.0245676	0.0871243		216.907	0.727887	0.000911621	0.00508835		216.907	-0.247402	0.290048	0.595541
NCU00366	0	2075.26	0.525872	0.0319426	0.062464		2075.26	-0.337523	0.169641	0.274877		2075.26	0.0276804	0.910251	0.942673		2075.26	-1.04263	2.40076e-05	0.000337785		2075.26	-0.829844	0.000715243	0.00418678		2075.26	-0.0716006	0.770405	0.906488
NCU00367	0	4.29956	4.02648	1.60137e-05	8.25493e-05	up	4.29956	0.79766	0.488271	0.60769		4.29956	0.503802	0.681946	0.772091		4.29956	-0.12107	0.929062	0.967914		4.29956	-0.0423385	0.969593	0.9826		4.29956	-1.46829	0.382928	0.683191
NCU00368	0	134.035	-2.42862	2.31476e-05	0.000114697	down	134.035	-1.66294	0.00304145	0.0108884		134.035	-1.82057	0.00127341	0.00559425		134.035	-1.66849	0.00300616	0.017261		134.035	-1.81145	0.00105417	0.00575884		134.035	0.544034	0.320426	0.626236
NCU00369	0	240.718	-1.27791	0.000305934	0.00110549		240.718	-0.974447	0.0054768	0.0177649		240.718	-1.64199	4.77873e-06	4.61126e-05		240.718	-0.930498	0.00806502	0.0377021		240.718	-0.903264	0.00878498	0.0327363		240.718	0.514563	0.133838	0.398656
NCU00370	0	173.56	6.57939	1.90745e-101	1.82791e-97	up	173.56	-0.2608	0.568861	0.678107		173.56	1.19761	0.00140719	0.00607035		173.56	0.136539	0.752907	0.867094		173.56	0.367671	0.304313	0.474479		173.56	0.41817	0.288655	0.593709
NCU00371	0	455.103	1.04138	0.0236488	0.0483418		455.103	0.57928	0.208729	0.321589		455.103	0.59162	0.199441	0.3119		455.103	-0.23546	0.611069	0.776786		455.103	0.110154	0.810708	0.888647		455.103	-0.579614	0.210667	0.502316
NCU00372	0	262.757	0.929772	0.0443049	0.0827468		262.757	1.09431	0.0177728	0.0463539		262.757	1.09191	0.0181252	0.0483139		262.757	0.430597	0.353566	0.560323		262.757	0.52347	0.255671	0.420836		262.757	-0.794186	0.0906195	0.321201
NCU00373	0	2216.89	-2.06534	5.53278e-05	0.000249274	down	2216.89	-2.11252	3.72155e-05	0.000268091	down	2216.89	-1.3325	0.00922897	0.0281584		2216.89	-1.70983	0.000839434	0.0061452		2216.89	-1.64693	0.00128134	0.00681316		2216.89	-1.586	0.00194065	0.0292043
NCU00375	0	53.2644	-0.835869	0.109488	0.178166		53.2644	-1.39434	0.00898205	0.0266686		53.2644	-1.39631	0.00946045	0.0286569		53.2644	-0.165273	0.746798	0.86414		53.2644	-1.03763	0.0410556	0.11118		53.2644	-0.90392	0.0809557	0.302858
NCU00376	0	230.648	0.360851	0.117711	0.188732		230.648	0.831429	0.000241327	0.00130384		230.648	0.458119	0.0469019	0.101634		230.648	0.504002	0.0281771	0.0959687		230.648	0.637699	0.00406993	0.0176085		230.648	0.443784	0.0511027	0.230188
NCU00377	0	385.968	-0.39293	0.0306777	0.0603415		385.968	-0.38279	0.0346689	0.0790809		385.968	-0.29007	0.110331	0.197936		385.968	-0.251575	0.164502	0.339885		385.968	-0.4205	0.016651	0.0540501		385.968	0.0153828	0.930932	0.974635
NCU00378	0	927.695	0.361898	0.221506	0.319875		927.695	1.23205	2.86963e-05	0.000212079		927.695	1.16545	7.69332e-05	0.000519887		927.695	0.840951	0.0043846	0.0232903		927.695	1.09261	0.000198784	0.00144613		927.695	0.561406	0.0571032	0.24449
NCU00379	0	398.898	-0.319136	0.0563471	0.101537		398.898	-0.209152	0.20734	0.320007		398.898	-0.120862	0.467486	0.587992		398.898	-0.107853	0.51547	0.702055		398.898	-0.165636	0.300623	0.470552		398.898	-0.0776222	0.63503	0.842495
NCU00380	0	2.25151	-2.20823	0.191592	0.283556		2.25151	0.0369199	0.973643	0.983982		2.25151	-0.116838	0.919866	0.948629		2.25151	0.147322	0.894981	1		2.25151	-0.835274	0.442257	0.60757		2.25151	-1.50591	0.270688	1
NCU00382	0	774.437	0.839257	0.0220948	0.0455678		774.437	1.15452	0.00161647	0.00642834		774.437	1.41587	0.000109753	0.000710207		774.437	0.679239	0.0641983	0.176017		774.437	1.0751	0.00324979	0.0146332		774.437	-0.218645	0.55264	0.79873
NCU00384	0	0.865076	0.829676	0.743899	0.8249		0.865076	-1.62585	0.551328	1		0.865076	0.00211091	0.99938	1		0.865076	0.936806	0.710991	1		0.865076	1.32406	0.579287	1		0.865076	-0.374175	0.890235	1
NCU00385	0	2580.35	0.685237	0.0072154	0.0173036		2580.35	0.571383	0.0250851	0.0611324		2580.35	0.689494	0.00687296	0.0220749		2580.35	0.247221	0.332969	0.540356		2580.35	0.446356	0.0796345	0.18245		2580.35	-0.15787	0.536514	0.790079
NCU00386	0	45.5521	-0.591485	0.0920238	0.153876		45.5521	-1.38454	0.000304373	0.0016014		45.5521	0.495631	0.126044	0.218622		45.5521	-0.348068	0.311353	0.518702		45.5521	-0.389884	0.219059	0.378693		45.5521	-0.896907	0.0106424	0.0869302
NCU00387	0	85.5193	0.831401	0.0030773	0.00824657		85.5193	0.246757	0.392602	0.517093		85.5193	0.14811	0.613747	0.71662		85.5193	0.107002	0.715099	0.846014		85.5193	-0.355247	0.205875	0.360842		85.5193	0.396887	0.160239	0.437122
NCU00388	0	1690.73	-0.407002	0.147342	0.227317		1690.73	-0.61152	0.0295582	0.0694773		1690.73	-0.584659	0.0375891	0.0857641		1690.73	-0.434557	0.121919	0.2768		1690.73	-0.440582	0.115701	0.239504		1690.73	-0.611422	0.0294434	0.167504
NCU00389	0	419.374	1.51437	2.57536e-09	2.93456e-08		419.374	1.16493	4.9431e-06	4.57988e-05		419.374	1.27295	6.10273e-07	7.46087e-06		419.374	0.539712	0.0364967	0.116576		419.374	0.933149	0.000224502	0.00159901		419.374	-0.0673142	0.795457	0.920413
NCU00391	0	0.103789	-0.907108	0.863589	0.914057		0.103789	-0.97767	0.853107	1		0.103789	-0.822631	0.876196	1		0.103789	-0.87772	0.867979	1		0.103789	-2.101	0.690707	1		0.103789	-1.21058	0.818663	1
NCU00392	0	142.105	0.883679	0.000599295	0.00197968		142.105	0.287982	0.273265	0.393258		142.105	0.516448	0.0486761	0.104505		142.105	0.122662	0.645068	0.796963		142.105	0.0781802	0.75878	0.854812		142.105	0.218786	0.401837	0.695125
NCU00395	0	662.169	0.0383685	0.885977	0.929529		662.169	-0.146073	0.58555	0.692177		662.169	-0.114841	0.668538	0.761496		662.169	-0.117583	0.660926	0.809024		662.169	0.0474154	0.858261	0.91839		662.169	0.0456412	0.864201	0.946336
NCU00396	0	667.701	0.192262	0.447198	0.563585		667.701	0.18352	0.467869	0.589186		667.701	0.258968	0.306009	0.432515		667.701	0.0580527	0.81878	0.905276		667.701	0.0707154	0.778172	0.867481		667.701	-0.43153	0.0891466	0.318754
NCU00397	0	1279.37	-1.82323	2.01944e-14	5.8466e-13		1279.37	-1.03891	1.02347e-05	8.74897e-05		1279.37	-0.80273	0.000644592	0.00317944		1279.37	-0.222183	0.342449	0.549863		1279.37	-0.0805029	0.729371	0.835092		1279.37	0.482434	0.0383278	0.195204
NCU00398	0	304.862	0.0770312	0.555113	0.666122		304.862	-0.0685505	0.601868	0.705465		304.862	-0.055898	0.674501	0.766313		304.862	-0.19144	0.153502	0.324995		304.862	-0.10362	0.396684	0.5662		304.862	0.176887	0.162349	0.439493
NCU00399	0	29564.5	-8.20165	1.43007e-23	1.26893e-21	down	29564.5	-7.41703	1.29669e-19	1.30243e-17	down	29564.5	-4.99655	9.86723e-10	2.35085e-08	down	29564.5	-5.5282	1.37083e-11	1.14056e-09	down	29564.5	-6.09025	9.3622e-14	6.22199e-12	down	29564.5	-2.20952	0.00686382	0.0656986
NCU00400	0	186.555	-1.23278	0.00519229	0.0129848		186.555	-0.993601	0.0235334	0.0580715		186.555	-1.37	0.00198967	0.00808954		186.555	-0.754228	0.0849267	0.214966		186.555	-1.08356	0.0124614	0.0431367		186.555	-0.551029	0.20525	0.495219
NCU00401	0	567.042	-2.40629	7.57883e-17	3.05159e-15	down	567.042	-2.56156	8.61979e-19	8.02003e-17	down	567.042	-2.16247	5.18821e-14	2.5477e-12	down	567.042	-0.839827	0.00273161	0.0160357		567.042	-1.31923	2.16848e-06	2.9902e-05		567.042	0.0334414	0.904166	0.96397
NCU00403	0	402.068	-4.54187	1.72197e-25	1.75549e-23	down	402.068	-3.36518	4.21492e-16	2.73939e-14	down	402.068	-3.54785	2.10242e-17	1.64454e-15	down	402.068	-2.24807	2.97205e-08	1.1743e-06	down	402.068	-2.90778	5.35286e-13	3.21863e-11	down	402.068	-0.628767	0.115537	0.367175
NCU00404	0	209.481	1.43507	9.36158e-05	0.00039643		209.481	0.170082	0.647709	0.74294		209.481	0.224567	0.546932	0.659347		209.481	-0.574392	0.129555	0.288184		209.481	-0.632587	0.0877549	0.196222		209.481	-0.0238913	0.948788	0.981454
NCU00405	0	3275.59	1.97139	2.32252e-07	1.82134e-06		3275.59	1.63231	1.85856e-05	0.000144357		3275.59	1.64217	1.65763e-05	0.000137964		3275.59	1.3129	0.00057674	0.00455756		3275.59	1.51544	6.98656e-05	0.000595508		3275.59	0.148967	0.696415	0.874358
NCU00406	0	1198.46	0.0301314	0.902506	0.939363		1198.46	0.0134835	0.956271	0.972443		1198.46	0.178049	0.468982	0.589244		1198.46	0.02873	0.907037	0.956795		1198.46	0.192601	0.43099	0.597034		1198.46	-0.225263	0.359635	0.662392
NCU00407	0	64.2917	0.300513	0.441704	0.558055		64.2917	0.409712	0.290227	0.410713		64.2917	0.143011	0.717765	0.800142		64.2917	0.329631	0.398728	0.602023		64.2917	0.598177	0.10811	0.227303		64.2917	0.816649	0.0309076	0.172655
NCU00408	0	154.986	2.03206	5.22779e-16	1.89765e-14	up	154.986	-0.0718868	0.796527	0.859017		154.986	2.74748	1.09992e-28	3.24072e-26	up	154.986	0.283419	0.299153	0.505382		154.986	0.868529	0.000526085	0.00323595		154.986	0.242078	0.365336	0.667581
NCU00409	0	167.18	0.623616	0.167038	0.25268		167.18	1.38596	0.00190295	0.00734405		167.18	1.96504	9.93584e-06	8.70395e-05		167.18	0.84836	0.059327	0.166422		167.18	1.37157	0.00195745	0.00969294		167.18	-0.053214	0.906821	0.965396
NCU00410	0	2147.18	0.877943	3.50519e-06	2.12462e-05		2147.18	0.645909	0.00064947	0.00304222		2147.18	0.655787	0.000540954	0.00275001		2147.18	0.0429641	0.821355	0.906297		2147.18	1.10738	4.22521e-09	1.24905e-07		2147.18	-0.441369	0.0205256	0.132912
NCU00411	0	330.191	0.585953	0.000113534	0.000468156		330.191	0.594216	8.41674e-05	0.000536764		330.191	0.67987	7.43151e-06	6.79991e-05		330.191	0.706386	2.88876e-06	5.72803e-05		330.191	1.33524	3.96493e-21	8.98617e-19		330.191	0.205238	0.178517	0.463319
NCU00412	0	260.901	1.05536	2.91522e-07	2.22957e-06		260.901	-0.293604	0.174309	0.280539		260.901	1.39212	1.01029e-11	3.24725e-10		260.901	0.162103	0.445151	0.641234		260.901	-6.7469	2.76365e-31	2.22072e-28	down	260.901	0.184829	0.377243	0.678714
NCU00413	0	16141.3	0.811266	0.00163642	0.00473649		16141.3	0.490576	0.0568774	0.116835		16141.3	0.793048	0.0020804	0.00838898		16141.3	-0.0751245	0.770656	0.877663		16141.3	0.206011	0.423795	0.590746		16141.3	0.0130353	0.959649	0.985971
NCU00414	0	3689.88	-0.00673991	0.979577	0.993049		3689.88	0.588948	0.0251158	0.0611735		3689.88	0.700603	0.00772047	0.0243632		3689.88	0.404752	0.123932	0.279703		3689.88	0.47281	0.07188	0.169336		3689.88	0.18881	0.472872	0.746039
NCU00415	0	427.169	0.889131	9.07614e-07	6.22596e-06		427.169	0.48218	0.00823739	0.0249864		427.169	0.468088	0.0106685	0.031475		427.169	-0.266609	0.155784	0.328043		427.169	-0.0461951	0.797655	0.87966		427.169	-0.44293	0.0176246	0.12193
NCU00416	0	102.13	-1.34833	1.19212e-05	6.35026e-05		102.13	-1.47162	1.94461e-06	2.04138e-05		102.13	-1.14445	0.000176491	0.00106267		102.13	-1.12063	0.000221344	0.00206167		102.13	-1.19903	2.80256e-05	0.000274937		102.13	-0.0721964	0.799323	0.922698
NCU00417	0	228.157	-0.599883	4.94174e-05	0.000225615		228.157	-0.571076	9.42733e-05	0.000592661		228.157	-0.693537	4.29273e-06	4.22063e-05		228.157	-0.813978	8.68731e-08	2.93638e-06		228.157	-0.716778	1.06879e-07	2.23335e-06		228.157	0.0940964	0.487564	0.755803
NCU00418	0	1337.05	-1.45338	1.43202e-31	2.40756e-29		1337.05	-0.00473828	0.96781	0.98023		1337.05	-0.0726842	0.538059	0.651761		1337.05	-0.00399052	0.972947	0.989679		1337.05	-0.0093803	0.935177	0.962846		1337.05	0.143061	0.219524	0.513165
NCU00419	0	72.7425	1.26715	0.0399231	0.0756542		72.7425	0.50348	0.417442	0.542693		72.7425	0.36828	0.554611	0.66579		72.7425	-1.23859	0.0560188	0.159661		72.7425	-0.883845	0.156049	0.295863		72.7425	-1.0907	0.087164	0.31439
NCU00420	0	1476.5	-1.29656	0.000177304	0.000689572		1476.5	-1.45222	2.69205e-05	0.000201741		1476.5	-1.16407	0.000760556	0.00363185		1476.5	-1.32025	0.000135029	0.00139928		1476.5	-1.30033	0.000162369	0.00120502		1476.5	-1.20838	0.000467564	0.0109941
NCU00421	0	170.035	0.137663	0.563485	0.674205		170.035	-0.0404107	0.866	0.9105		170.035	-0.0294182	0.902898	0.937584		170.035	-0.29727	0.222907	0.417582		170.035	-0.242758	0.294969	0.464747		170.035	0.186146	0.428407	0.714979
NCU00422	0	3057.3	1.43506	2.34755e-10	3.32297e-09		3057.3	1.0306	5.4295e-06	4.98871e-05		3057.3	1.17297	2.27251e-07	3.10459e-06		3057.3	0.777465	0.000609644	0.00475676		3057.3	0.970897	1.77265e-05	0.000187207		3057.3	0.0293632	0.897159	0.961667
NCU00423	0	618.88	-0.837633	0.00347137	0.00917433		618.88	-0.668251	0.0193427	0.0495709		618.88	-0.427893	0.133826	0.22934		618.88	0.0424429	0.88119	0.941118		618.88	-0.257957	0.36105	0.530914		618.88	0.122014	0.66654	0.858911
NCU00424	0	646.541	-0.0995465	0.505369	0.619461		646.541	0.0611421	0.679997	0.769688		646.541	0.260814	0.0780341	0.151892		646.541	0.387667	0.00843856	0.0390684		646.541	0.271913	0.0587595	0.146004		646.541	0.177463	0.226352	0.51974
NCU00425	0	2.24549	5.53727	0.0289513	0.0574292		2.24549	-0.016278	0.995514	0.998391		2.24549	4.77429	0.0616903	0.126314		2.24549	0.083673	0.976944	1		2.24549	0.3664	0.898459	0.941603		2.24549	-0.249189	0.931411	1
NCU00426	0	54.4211	-0.504895	0.115712	0.186301		54.4211	0.330156	0.255471	0.373541		54.4211	0.762402	0.00721636	0.0230113		54.4211	0.260126	0.377711	0.583214		54.4211	0.715014	0.00703075	0.0276691		54.4211	-0.704437	0.026075	0.155284
NCU00427	0	188.48	0.58546	0.00183045	0.00523149		188.48	-0.160994	0.407575	0.532403		188.48	-0.0711217	0.715543	0.799177		188.48	-1.32418	1.04915e-09	5.78234e-08		188.48	-0.83541	1.07093e-05	0.000120126		188.48	-0.635963	0.00128056	0.0222058
NCU00428	0	116.705	0.581834	0.168754	0.254833		116.705	0.180392	0.671357	0.762153		116.705	0.26996	0.525951	0.640784		116.705	-0.603081	0.165358	0.341246		116.705	-0.279583	0.506531	0.661814		116.705	-0.565938	0.188165	0.475663
NCU00430	0	1108.13	-0.48661	0.468321	0.58444		1108.13	-0.773298	0.249217	0.366772		1108.13	-0.946001	0.158804	0.261536		1108.13	-1.12002	0.0953022	0.23282		1108.13	-1.15785	0.0843113	0.191076		1108.13	-2.37396	0.000415965	0.0102545	down
NCU00431	0	897.899	0.695843	0.0277921	0.0554626		897.899	0.22174	0.483943	0.603623		897.899	0.536175	0.0903083	0.169873		897.899	-0.369942	0.244794	0.443509		897.899	-0.169303	0.592047	0.7326		897.899	-0.377633	0.23412	0.529019
NCU00432	0	750.955	-0.383103	0.0276349	0.0552295		750.955	-0.522657	0.00270307	0.00989743		750.955	-0.0828464	0.632299	0.73153		750.955	-0.323735	0.062538	0.172889		750.955	-0.330194	0.0528984	0.134902		750.955	-0.264218	0.125544	0.384951
NCU00434	0	1214.82	-0.954763	1.0986e-06	7.36213e-06		1214.82	-0.875346	7.5585e-06	6.70106e-05		1214.82	-0.809112	3.57266e-05	0.000266488		1214.82	-0.105703	0.585922	0.758538		1214.82	-0.192058	0.318903	0.489627		1214.82	-0.263805	0.173355	0.454846
NCU00435	0	397.216	-0.0507492	0.787613	0.858288		397.216	-0.399005	0.0359393	0.0812864		397.216	-0.549866	0.00431206	0.0151669		397.216	0.0146076	0.938116	0.971692		397.216	-0.0111224	0.951624	0.972491		397.216	-0.0193993	0.917187	0.970104
NCU00436	0	841.701	0.252002	0.233718	0.333987		841.701	-0.0930618	0.661107	0.753906		841.701	-0.0593421	0.780154	0.849653		841.701	-0.321816	0.131247	0.29105		841.701	-0.208557	0.321496	0.49148		841.701	0.143983	0.495448	0.761477
NCU00437	0	75.034	3.461	2.61706e-14	7.41991e-13	up	75.034	1.68139	0.000417917	0.00210363		75.034	4.33575	5.96116e-22	7.98344e-20	up	75.034	0.814772	0.106758	0.252122		75.034	2.37868	1.58348e-07	3.11724e-06	up	75.034	-0.707821	0.217235	0.510243
NCU00438	0	42.3693	0.179493	0.592895	0.701359		42.3693	0.995972	0.00131257	0.00541382		42.3693	0.472139	0.150505	0.250908		42.3693	0.41126	0.210694	0.403385		42.3693	0.723921	0.0143004	0.0478793		42.3693	-0.332297	0.334066	0.639221
NCU00440	0	1435.56	0.300401	0.0501255	0.0918281		1435.56	-0.395169	0.0106207	0.0305887		1435.56	-0.202375	0.190423	0.300885		1435.56	0.00720425	0.962677	0.984057		1435.56	-0.015666	0.918044	0.952305		1435.56	-0.156792	0.307442	0.611562
NCU00441	0	466.066	-0.967821	2.94038e-09	3.31112e-08		466.066	-1.11864	8.4661e-12	2.77155e-10		466.066	-0.921776	1.6862e-08	3.08579e-07		466.066	-0.800455	7.7357e-07	1.91249e-05		466.066	-0.837874	7.46602e-08	1.60175e-06		466.066	-0.237701	0.129658	0.392683
NCU00442	0	569.808	-0.456176	0.149476	0.229962		569.808	-0.032267	0.918439	0.944694		569.808	-0.631291	0.0467218	0.101393		569.808	-0.221462	0.483198	0.675756		569.808	-0.278766	0.373975	0.545113		569.808	0.444711	0.156402	0.430727
NCU00443	0	4086.98	0.253078	0.107061	0.17502		4086.98	0.270427	0.0849499	0.161791		4086.98	0.237697	0.130305	0.224429		4086.98	0.187703	0.232192	0.429537		4086.98	0.415798	0.00785345	0.0301288		4086.98	0.285774	0.0684215	0.274225
NCU00444	0	595.489	0.370304	0.00231038	0.00641377		595.489	0.399914	0.000944903	0.00412897		595.489	0.459706	0.000154475	0.000947541		595.489	0.314129	0.0100607	0.0443707		595.489	0.349565	0.0027104	0.0126624		595.489	0.203095	0.0925501	0.324488
NCU00445	0	268.023	-0.569014	0.000623671	0.0020475		268.023	-0.546189	0.000942001	0.00412195		268.023	-0.12767	0.430938	0.555176		268.023	-0.630958	0.00016609	0.00165382		268.023	-0.479703	0.00193409	0.00959337		268.023	0.168142	0.281888	0.585637
NCU00446	0	185.118	-0.633578	0.00228502	0.00635164		185.118	-0.253898	0.20486	0.317105		185.118	0.253482	0.195209	0.306638		185.118	0.21632	0.268455	0.471088		185.118	0.393831	0.0332689	0.094524		185.118	-0.208943	0.287827	0.59271
NCU00447	0	2303.43	-1.11795	7.55759e-05	0.000328632		2303.43	-0.26686	0.343108	0.467943		2303.43	0.151767	0.58953	0.695656		2303.43	0.315297	0.262133	0.463955		2303.43	0.098424	0.725939	0.832888		2303.43	-0.905832	0.00130883	0.0225412
NCU00448	0	97.6368	-0.546658	0.00860841	0.0201877		97.6368	-0.0393639	0.837969	0.890456		97.6368	-0.18728	0.349157	0.477223		97.6368	-0.296778	0.140865	0.306028		97.6368	-0.0808819	0.642585	0.772763		97.6368	0.239388	0.189383	0.477504
NCU00449	0	7.33197	0.366116	0.646861	0.748024		7.33197	-2.019	0.0508058	0.107459		7.33197	0.758777	0.334365	0.46257		7.33197	-2.86236	0.0221934	0.0810978		7.33197	-1.62288	0.0555374	0.139538		7.33197	-1.40105	0.123873	0.382128
NCU00450	0	2093.75	-2.55202	9.39158e-08	8.0285e-07	down	2093.75	-1.73696	0.000270929	0.00144353		2093.75	-1.8691	8.99109e-05	0.000593519		2093.75	-1.06721	0.0251255	0.088441		2093.75	-1.47519	0.00194804	0.00965173		2093.75	0.32824	0.490398	0.758565
NCU00451	0	1678.14	-5.9349	1.68403e-20	1.09783e-18	down	1678.14	-4.31763	5.48546e-12	1.8577e-10	down	1678.14	-4.08578	6.77015e-11	1.96201e-09	down	1678.14	-2.54671	4.27206e-05	0.000555047	down	1678.14	-3.02258	1.15728e-06	1.74559e-05	down	1678.14	0.551756	0.37398	0.675303
NCU00453	0	315.814	0.181732	0.253283	0.356943		315.814	-0.0224084	0.888818	0.924157		315.814	0.18289	0.252445	0.374704		315.814	-0.128325	0.429171	0.627088		315.814	0.0056124	0.970683	0.98307		315.814	0.189858	0.225563	0.519478
NCU00454	0	199.654	-0.152158	0.652557	0.75304		199.654	-0.43549	0.199357	0.31056		199.654	-0.748995	0.0289982	0.069936		199.654	-1.05433	0.00227808	0.0138526		199.654	-1.0506	0.00179105	0.00901029		199.654	-0.247751	0.462027	0.740332
NCU00455	0	626.991	0.498769	3.45935e-05	0.000164114		626.991	0.158612	0.193422	0.30329		626.991	0.288987	0.0179396	0.0478912		626.991	0.229461	0.0602455	0.168271		626.991	0.148774	0.204159	0.358616		626.991	0.29124	0.015207	0.109655
NCU00456	0	369.383	0.693675	0.00257693	0.00705361		369.383	0.614424	0.00760483	0.0233481		369.383	1.01668	9.05261e-06	8.01764e-05		369.383	0.291353	0.210348	0.403334		369.383	0.78785	0.000487589	0.00302626		369.383	0.498941	0.0297923	0.168933
NCU00457	0	1800.87	1.5731	8.25856e-06	4.57732e-05		1800.87	1.01814	0.00393113	0.0134315		1800.87	1.25477	0.000378957	0.00201905		1800.87	0.267803	0.448985	0.644717		1800.87	0.552216	0.117505	0.24216		1800.87	-0.292764	0.408186	0.699275
NCU00458	0	190.973	0.671002	4.3412e-05	0.000200877		190.973	0.401362	0.0160746	0.0429645		190.973	0.791827	1.313e-06	1.49749e-05		190.973	0.141283	0.412199	0.61295		190.973	0.35841	0.021448	0.0659863		190.973	0.492873	0.00244235	0.0336523
NCU00459	0	582.285	-0.20944	0.324672	0.436371		582.285	-0.329351	0.121785	0.213201		582.285	-0.293696	0.168583	0.274068		582.285	-0.293329	0.168647	0.345971		582.285	-0.429769	0.0406805	0.110333		582.285	-0.249747	0.238212	0.534467
NCU00461	0	1482.39	-0.789996	0.00138714	0.00409518		1482.39	-0.539603	0.0286055	0.0676959		1482.39	-0.877366	0.000391444	0.00207806		1482.39	-0.478957	0.0520837	0.151438		1482.39	-0.357637	0.14462	0.280328		1482.39	0.83581	0.000645495	0.0138254
NCU00462	0	0.230465	-1.45628	0.781973	0.854025		0.230465	-1.52688	0.771709	1		0.230465	-1.37184	0.794339	1		0.230465	-1.42693	0.786277	1		0.230465	-2.65021	0.614544	1		0.230465	-0.239884	0.963565	1
NCU00463	0	394.738	1.36192	2.13636e-05	0.00010674		394.738	1.29905	5.03294e-05	0.000346736		394.738	1.33965	2.95725e-05	0.000227297		394.738	1.07581	0.000815865	0.00599803		394.738	1.14953	0.000307228	0.00207932		394.738	0.193243	0.550458	0.798517
NCU00464	0	11542	1.14258	8.07883e-05	0.00034764		11542	0.492836	0.0891313	0.16791		11542	0.825889	0.00438508	0.0153687		11542	-0.000984477	0.997291	0.998907		11542	0.202881	0.483922	0.642251		11542	-0.313807	0.279195	0.582472
NCU00465	0	951.082	0.691396	5.54572e-07	3.99885e-06		951.082	0.826389	1.88319e-09	3.96321e-08		951.082	0.736643	9.83987e-08	1.46176e-06		951.082	0.159575	0.254552	0.455373		951.082	0.377683	0.00555405	0.0227384		951.082	-0.116302	0.405561	0.697287
NCU00466	0	233.375	0.0472272	0.884277	0.928487		233.375	0.534528	0.0960463	0.178019		233.375	0.415635	0.197645	0.309805		233.375	0.172251	0.594752	0.763881		233.375	0.503536	0.112618	0.234384		233.375	0.20291	0.528153	0.784164
NCU00467	0	377.723	-0.405055	0.157803	0.240532		377.723	0.185091	0.51331	0.629985		377.723	-0.196077	0.492899	0.611229		377.723	0.748455	0.0078184	0.0368478		377.723	0.734201	0.00844953	0.0318488		377.723	0.464655	0.0985113	0.335862
NCU00468	0	258.843	0.867018	0.0300988	0.0593857		258.843	-0.0193279	0.961716	0.976184		258.843	0.177543	0.659107	0.754447		258.843	-0.182706	0.651069	0.801692		258.843	-0.0692821	0.862203	0.919968		258.843	-0.556036	0.168941	0.448282
NCU00469	0	112.592	0.386787	0.166536	0.25203		112.592	0.233355	0.405545	0.530581		112.592	-0.369315	0.205825	0.319901		112.592	-0.303247	0.295203	0.501746		112.592	-0.159352	0.56054	0.706325		112.592	-0.37474	0.189315	0.477504
NCU00470	0	198.041	0.0635077	0.770593	0.8455		198.041	0.636852	0.00253852	0.00940795		198.041	0.206216	0.342065	0.47022		198.041	0.500057	0.0189635	0.0719069		198.041	0.5225	0.0106743	0.0380443		198.041	0.449604	0.0327451	0.178653
NCU00471	0	95.0427	-2.15082	7.24788e-07	5.08838e-06	down	95.0427	-1.23624	0.00258607	0.00954815		95.0427	-0.702586	0.0823383	0.158363		95.0427	-0.736359	0.0684336	0.184315		95.0427	-1.14157	0.0039171	0.0171473		95.0427	-0.25008	0.527385	0.784164
NCU00472	0	737.442	0.458357	0.107981	0.176163		737.442	0.730891	0.0101851	0.0295167		737.442	0.474811	0.0960966	0.177959		737.442	0.789194	0.00554102	0.0281872		737.442	0.943679	0.000847773	0.00480043		737.442	0.626872	0.0274108	0.160586
NCU00473	0	474.924	-0.562763	0.0240872	0.0491333		474.924	-0.711399	0.00441014	0.0147433		474.924	-1.21621	1.64776e-06	1.82743e-05		474.924	-0.529448	0.0338039	0.110088		474.924	-0.696306	0.00466183	0.0197063		474.924	0.164092	0.504999	0.768185
NCU00474	0	0.90311	5.38148	0.17514	0.263026		0.90311	2.11158	0.614114	1		0.90311	0	1	1		0.90311	0	1	1		0.90311	2.57209	0.523265	1		0.90311	0	1	1
NCU00475	0	17857.6	1.29887	9.81694e-07	6.63908e-06		17857.6	0.463768	0.080546	0.155108		17857.6	0.806792	0.0023637	0.00936894		17857.6	-0.0148323	0.955441	0.980482		17857.6	0.232428	0.381021	0.551807		17857.6	-0.0840451	0.751507	0.896813
NCU00476	0	135.748	2.10578	3.80111e-16	1.40641e-14	up	135.748	1.34572	3.3238e-07	4.31411e-06		135.748	1.10273	3.82833e-05	0.000283406		135.748	0.392135	0.15764	0.3302		135.748	0.601742	0.020926	0.0647637		135.748	0.146054	0.596684	0.822744
NCU00477	0	5703.1	0.104028	0.722469	0.807585		5703.1	0.435459	0.136949	0.233866		5703.1	0.305983	0.296125	0.422442		5703.1	0.696225	0.017399	0.0674834		5703.1	0.489827	0.0941232	0.206031		5703.1	-0.0667036	0.819831	0.929507
NCU00478	0	307.21	-1.45458	0.0431029	0.0808328		307.21	-2.2976	0.00145289	0.00591255	down	307.21	-2.01584	0.0051821	0.0176852	down	307.21	-2.59777	0.000330024	0.00287373	down	307.21	-2.631	0.000253425	0.00176241	down	307.21	-2.34159	0.00116117	0.0210007	down
NCU00480	0	1093.13	-0.229496	0.430021	0.54632		1093.13	-0.178162	0.539882	0.653791		1093.13	-0.0696474	0.810653	0.872123		1093.13	-0.35932	0.217006	0.410719		1093.13	-0.411794	0.155236	0.29486		1093.13	-0.683895	0.0187858	0.126304
NCU00481	0	850.307	-0.306566	0.455882	0.572196		850.307	0.23839	0.560947	0.670673		850.307	0.102196	0.803385	0.86645		850.307	1.57175	0.000120447	0.00127216		850.307	1.09091	0.00755661	0.0292438		850.307	-0.276827	0.500043	0.765291
NCU00483	0	154.215	0.181039	0.741942	0.823111		154.215	-0.607782	0.271815	0.391745		154.215	-0.508037	0.358595	0.486362		154.215	-1.19464	0.0323095	0.106406		154.215	-1.06224	0.0534354	0.13584		154.215	-1.52629	0.0062426	0.0619463
NCU00484	0	1619.79	-0.689191	0.000252475	0.000936691		1619.79	-0.208391	0.265878	0.385261		1619.79	-0.135085	0.471063	0.591354		1619.79	-0.0564041	0.7632	0.87331		1619.79	-0.15171	0.41486	0.58298		1619.79	-0.137644	0.461398	0.740224
NCU00485	0	1.19229	-4.11052	0.104818	0.17188		1.19229	-4.1811	0.0989961	1		1.19229	-4.02606	0.112159	1		1.19229	-4.08115	0.107332	1		1.19229	-3.80599	0.129127	1		1.19229	-1.96986	0.395843	1
NCU00486	0	1275.15	-2.58984	3.85549e-05	0.000180936	down	1275.15	-1.62437	0.0096967	0.0283617		1275.15	-2.13597	0.000680077	0.00331744	down	1275.15	-1.75387	0.00524152	0.0269285		1275.15	-1.74563	0.00540147	0.022196		1275.15	-1.54627	0.0137787	0.102253
NCU00487	0	89.5722	1.2011	3.40469e-05	0.000161761		89.5722	1.62777	9.10554e-09	1.65265e-07		89.5722	1.59429	2.3412e-08	4.1554e-07		89.5722	0.821182	0.00569436	0.0287811		89.5722	1.31545	1.91381e-06	2.7024e-05		89.5722	-0.0111492	0.971192	0.991627
NCU00488	0	1575.84	0.261215	0.199109	0.292827		1575.84	0.390613	0.0545296	0.113249		1575.84	0.446068	0.0282164	0.0684427		1575.84	0.236914	0.244338	0.443217		1575.84	0.301729	0.135776	0.267467		1575.84	-0.331406	0.104039	0.346783
NCU00489	0	14638.4	0.954785	0.000288648	0.00105336		14638.4	0.607273	0.0211347	0.0533436		14638.4	0.796894	0.002482	0.00972016		14638.4	0.0152787	0.953758	0.979569		14638.4	0.273392	0.299178	0.469038		14638.4	-0.0444719	0.865945	0.94716
NCU00490	0	715.812	-1.93624	3.94958e-06	2.36261e-05		715.812	-1.49467	0.000352785	0.00181617		715.812	-1.62511	0.000105051	0.000682255		715.812	-1.5523	0.000209106	0.00197963		715.812	-1.52473	0.000252582	0.00175793		715.812	-0.967702	0.0203117	0.132059
NCU00491	0	0.427622	3.29055	0.515362	0.629516		0.427622	2.10985	0.682583	1		0.427622	0	1	1		0.427622	2.23963	0.664515	1		0.427622	2.57122	0.609332	1		0.427622	0	1	1
NCU00492	0	894.751	-0.548652	0.00167741	0.00484613		894.751	-0.496678	0.00435385	0.0145937		894.751	-0.642639	0.000246566	0.00139884		894.751	0.191875	0.266113	0.468881		894.751	-0.549984	0.00135225	0.00713586		894.751	-0.310098	0.0729782	0.283427
NCU00493	0	1765.94	-0.371391	0.0101288	0.0231988		1765.94	-0.162135	0.259765	0.377953		1765.94	-0.365764	0.0114289	0.0332522		1765.94	0.0763386	0.59505	0.763942		1765.94	-0.0604102	0.671277	0.794619		1765.94	0.00542339	0.969794	0.991243
NCU00494	0	121.335	-0.688081	0.00839275	0.0197563		121.335	0.590312	0.0123869	0.0345605		121.335	-0.0670333	0.787403	0.854179		121.335	0.366955	0.126654	0.283995		121.335	0.234632	0.305327	0.475256		121.335	0.645226	0.00560205	0.0579146
NCU00495	0	528.453	-0.791514	0.000574752	0.00191511		528.453	-0.688283	0.00264884	0.00973565		528.453	-0.201118	0.376698	0.504092		528.453	-0.047111	0.835406	0.915281		528.453	-0.311572	0.164917	0.307857		528.453	-0.432749	0.0565283	0.243139
NCU00496	0	151.679	0.52668	0.40621	0.522862		151.679	-1.41404	0.0289446	0.0683155		151.679	0.582492	0.358382	0.486148		151.679	-0.117401	0.853797	0.924875		151.679	-0.00304544	0.996157	0.998318		151.679	0.0168751	0.978795	0.993637
NCU00497	0	206.404	-1.06571	0.0269946	0.0541417		206.404	-1.41751	0.00340021	0.0119075		206.404	-1.33346	0.00591952	0.0196924		206.404	-0.971074	0.043695	0.133131		206.404	-1.26869	0.00783632	0.0300892		206.404	0.244391	0.607207	0.827601
NCU00498	0	233.377	0.508093	0.0375558	0.0718358		233.377	0.0977135	0.692146	0.779149		233.377	0.374661	0.127476	0.220457		233.377	-0.245439	0.327944	0.53592		233.377	0.021461	0.928957	0.958899		233.377	0.309796	0.203591	0.493169
NCU00499	0	4189.89	-1.09554	0.000733231	0.00235949		4189.89	-0.0995603	0.758547	0.829801		4189.89	-0.307914	0.341978	0.47022		4189.89	0.376981	0.244289	0.443217		4189.89	-0.137005	0.672046	0.795035		4189.89	0.414866	0.199955	0.488391
NCU00500	0	13.3997	0.309114	0.590133	0.699128		13.3997	-0.932531	0.14978	0.250645		13.3997	-0.894683	0.173885	0.280366		13.3997	-0.81695	0.206087	0.398239		13.3997	-0.393416	0.47888	0.637559		13.3997	0.535799	0.333747	0.63906
NCU00501	0	147.265	1.85194	0.000153438	0.000604107		147.265	0.956773	0.0519217	0.109271		147.265	1.17877	0.0165582	0.0449918		147.265	-0.581537	0.250799	0.450897		147.265	-0.0710967	0.885052	0.933975		147.265	-1.2027	0.0185819	0.125813
NCU00502	0	3679.59	0.639553	0.0102279	0.0233701		3679.59	0.477009	0.0554865	0.114697		3679.59	0.692139	0.00545208	0.018452		3679.59	0.189529	0.447065	0.642578		3679.59	0.39515	0.112179	0.233637		3679.59	-0.12644	0.611982	0.829875
NCU00503	0	213.375	1.95454	6.16414e-45	2.68504e-42		213.375	1.36338	3.22757e-21	4.0755e-19		213.375	1.77118	5.59144e-36	3.29485e-33		213.375	0.706277	5.5218e-06	9.80149e-05		213.375	0.890795	1.05263e-10	4.38876e-09		213.375	0.381704	0.0139653	0.103195
NCU00504	0	65.075	1.9051	3.59895e-11	5.80619e-10		65.075	1.05313	0.000480971	0.00238035		65.075	1.60902	4.28198e-08	7.22298e-07		65.075	1.06201	0.000471028	0.00388172		65.075	1.04152	0.000242132	0.00170398		65.075	0.403578	0.196219	0.484137
NCU00505	0	489.407	0.681766	0.000341136	0.00121982		489.407	0.429328	0.0246529	0.0603787		489.407	0.473191	0.0135063	0.0380951		489.407	0.192879	0.316814	0.524357		489.407	0.276069	0.142042	0.276513		489.407	-0.0647314	0.736405	0.89108
NCU00506	0	586.855	-0.333513	0.142397	0.220915		586.855	0.128142	0.56915	0.678151		586.855	0.182751	0.417577	0.54255		586.855	0.40908	0.0683808	0.184315		586.855	0.194247	0.381957	0.552646		586.855	0.773778	0.000512321	0.0115747
NCU00509	0	70.6728	0.950464	0.0497311	0.0912264		70.6728	-0.783484	0.11907	0.209529		70.6728	-1.81264	0.000701309	0.00340037		70.6728	-1.1155	0.0292382	0.0987887		70.6728	-1.16672	0.0177295	0.0566768		70.6728	0.000740667	0.998792	1
NCU00510	0	1.03468	-0.580982	0.821516	0.883976		1.03468	-2.12548	0.41188	1		1.03468	0.42212	0.85973	1		1.03468	-2.02553	0.434214	1		1.03468	0.496697	0.825087	1		1.03468	1.61415	0.469874	1
NCU00512	0	159.77	-0.657272	0.0385369	0.0733755		159.77	-0.819231	0.010222	0.029614		159.77	-0.147107	0.637886	0.736741		159.77	0.470295	0.125443	0.282158		159.77	0.0539345	0.858634	0.91839		159.77	0.0194653	0.949567	0.981806
NCU00513	0	428.823	-1.15094	1.59789e-10	2.33069e-09		428.823	-0.22597	0.183921	0.292651		428.823	0.125328	0.457617	0.578666		428.823	0.27009	0.106964	0.252471		428.823	0.30121	0.0644504	0.156033		428.823	0.145476	0.382246	0.682592
NCU00515	0	1401.19	-2.54367	1.80965e-14	5.30334e-13	down	1401.19	-1.55357	2.35994e-06	2.40872e-05		1401.19	-1.05569	0.00131524	0.00574945		1401.19	-0.443127	0.176504	0.356927		1401.19	-0.792725	0.0154276	0.0509393		1401.19	-0.54245	0.0978231	0.334835
NCU00516	0	8.40782	-2.08437	0.0419391	0.0790214		8.40782	-1.93753	0.0516125	0.108697		8.40782	-1.99754	0.0511754	0.108683		8.40782	-0.445919	0.61036	0.776341		8.40782	-0.460486	0.578602	0.722456		8.40782	-0.296524	0.72793	0.888514
NCU00517	0	247.801	-0.428984	0.00604412	0.0148515		247.801	-0.206188	0.176417	0.282978		247.801	-0.345907	0.0268668	0.0659289		247.801	-0.380823	0.0146331	0.059107		247.801	-0.442661	0.00220038	0.0106746		247.801	-0.0657853	0.658022	0.855064
NCU00518	0	835.297	-0.334861	0.406773	0.523517		835.297	0.5733	0.153938	0.255474		835.297	-0.090188	0.823056	0.881817		835.297	0.802315	0.0459323	0.138292		835.297	0.926573	0.0208748	0.0646732		835.297	0.0732829	0.855501	0.942471
NCU00519	0	878.712	0.690052	0.00116885	0.00353348		878.712	1.26475	2.13384e-09	4.42746e-08		878.712	0.916437	1.57155e-05	0.000131418		878.712	0.725486	0.000641612	0.00494378		878.712	1.15095	4.26474e-08	9.81668e-07		878.712	0.353414	0.0965212	0.332223
NCU00520	0	1445.88	-1.66995	0.000100464	0.000421333		1445.88	-1.48522	0.000536712	0.00260373		1445.88	-1.68539	8.70362e-05	0.000577562		1445.88	-1.69844	7.65001e-05	0.000889725		1445.88	-1.72019	5.90881e-05	0.000516087		1445.88	-0.181602	0.671321	0.860227
NCU00521	0	1260.55	-2.59631	2.71858e-16	1.03382e-14	down	1260.55	-2.39152	4.10285e-14	2.02598e-12	down	1260.55	-2.20904	2.89495e-12	1.01946e-10	down	1260.55	-1.86934	3.12034e-09	1.54287e-07		1260.55	-2.01621	1.36373e-10	5.55486e-09	down	1260.55	-1.49544	1.97512e-06	0.000154888
NCU00522	0	2754.12	-0.429027	0.263081	0.368529		2754.12	0.834898	0.029042	0.0684729		2754.12	1.91878	5.15397e-07	6.42538e-06		2754.12	0.805106	0.0353146	0.113851		2754.12	1.27055	0.000883165	0.00495953		2754.12	0.161308	0.673372	0.861426
NCU00523	0	186.88	0.0255535	0.887474	0.930793		186.88	0.0739302	0.679375	0.769279		186.88	0.14978	0.405326	0.53187		186.88	0.418891	0.0170856	0.0666556		186.88	0.101217	0.545289	0.693897		186.88	0.372445	0.0308346	0.172623
NCU00524	0	11.9034	0.86048	0.283003	0.391363		11.9034	-1.23427	0.173445	0.279351		11.9034	-0.0357217	0.96593	0.979698		11.9034	-0.464934	0.587238	0.759211		11.9034	-0.427465	0.59497	0.735002		11.9034	-0.218316	0.791821	0.918942
NCU00525	0	0.564376	-1.27254	0.807277	0.873746		0.564376	-1.4431	0.782205	1		0.564376	-2.69268	0.606398	1		0.564376	-2.74777	0.599053	1		0.564376	-3.97104	0.447358	1		0.564376	-3.08062	0.555558	1
NCU00526	0	5.66954	0.325642	0.656632	0.756493		5.66954	-3.54748	0.0215181	0.0540491		5.66954	-0.581534	0.482193	0.601482		5.66954	0.266848	0.717991	0.847561		5.66954	-0.671902	0.350331	0.520695		5.66954	-1.20051	0.16182	0.438727
NCU00527	0	489.379	0.683187	4.74815e-05	0.000217815		489.379	0.354478	0.0360897	0.0815223		489.379	0.289498	0.0890907	0.168012		489.379	-0.16155	0.349906	0.557042		489.379	0.0334761	0.840263	0.907675		489.379	0.298372	0.076257	0.291841
NCU00528	0	438.877	-0.00158194	0.9948	0.999389		438.877	-0.298789	0.220145	0.334341		438.877	-0.190316	0.435169	0.559078		438.877	-0.471676	0.0541924	0.155826		438.877	-0.400058	0.0960975	0.208886		438.877	-0.477924	0.0496204	0.225744
NCU00529	0	0.488577	4.80469	0.349358	0.462673		0.488577	0	1	1		0.488577	0	1	1		0.488577	0	1	1		0.488577	0	1	1		0.488577	0	1	1
NCU00532	0	0.496011	3.49852	0.461295	0.577576		0.496011	-0.0162652	0.997357	1		0.496011	1.63522	0.738694	1		0.496011	0.0836847	0.986404	1		0.496011	0.409823	0.933264	1		0.496011	-0.249173	0.959532	1
NCU00533	0	0.826305	-3.47212	0.454274	0.570551		0.826305	-3.54276	0.445178	1		0.826305	-1.96546	0.671634	1		0.826305	-2.00804	0.665106	1		0.826305	-4.66609	0.314627	1		0.826305	-3.77567	0.415834	1
NCU00534	0	8.78616	-1.31803	0.188216	0.27948		8.78616	-0.779899	0.414032	0.539132		8.78616	-2.62144	0.0286216	0.0692164		8.78616	-1.92152	0.0731806	0.193117		8.78616	-1.77941	0.0603129	0.148659		8.78616	0.941426	0.286924	0.591923
NCU00535	0	204.414	0.776803	0.131972	0.207608		204.414	1.61382	0.00157945	0.00630853		204.414	2.86224	1.72629e-08	3.15262e-07	up	204.414	1.34149	0.00884296	0.0402727		204.414	2.17518	1.77274e-05	0.000187207	up	204.414	0.42457	0.41066	0.701707
NCU00536	0	489.439	0.724923	0.00615279	0.015076		489.439	0.270072	0.309719	0.431255		489.439	0.664249	0.0122048	0.0350597		489.439	0.321912	0.226256	0.421665		489.439	0.543973	0.038284	0.105287		489.439	0.170993	0.519378	0.778886
NCU00537	0	1074.11	-1.08615	0.00832374	0.0196227		1074.11	-1.12527	0.00625587	0.0199045		1074.11	-0.780332	0.0577451	0.119835		1074.11	0.341222	0.405055	0.607147		1074.11	-0.165954	0.685201	0.805225		1074.11	0.588373	0.15072	0.423804
NCU00538	0	618.291	-1.29407	1.90594e-07	1.52332e-06		618.291	-1.18593	1.68036e-06	1.79815e-05		618.291	-0.778565	0.00159667	0.00674661		618.291	-0.580654	0.0181664	0.0697091		618.291	-0.959727	8.3051e-05	0.000685423		618.291	-0.874709	0.000370778	0.00949301
NCU00541	0	2635.22	-0.953982	0.00173976	0.00499914		2635.22	-0.993451	0.00110922	0.00471138		2635.22	-0.723851	0.0174492	0.0468425		2635.22	0.477666	0.115808	0.266797		2635.22	0.275089	0.364668	0.534633		2635.22	-0.125086	0.680587	0.865029
NCU00542	0	697.045	-1.13686	7.16581e-05	0.000313561		697.045	-1.0108	0.000401168	0.00203089		697.045	-0.397709	0.16172	0.265104		697.045	-0.200189	0.4803	0.673099		697.045	-0.490352	0.0822438	0.186974		697.045	-0.265782	0.34784	0.651484
NCU00545	0	960.737	0.113344	0.593928	0.702321		960.737	-0.670836	0.00174593	0.00686543		960.737	-0.384128	0.072536	0.143544		960.737	0.0308539	0.88472	0.943073		960.737	-0.202685	0.337619	0.507692		960.737	-0.775387	0.000289415	0.00786233
NCU00547	0	10.539	-0.0759641	0.901374	0.939204		10.539	-0.726209	0.26807	0.387733		10.539	-2.65768	0.00673071	0.0217597	down	10.539	0.399976	0.49684	0.687205		10.539	-0.291415	0.60746	0.744707		10.539	-0.527995	0.396422	0.691126
NCU00548	0	44.5542	1.44798	0.00192122	0.00545352		44.5542	0.315219	0.516791	0.632933		44.5542	0.766937	0.109599	0.197059		44.5542	0.653638	0.173776	0.353143		44.5542	0.78178	0.0900464	0.20007		44.5542	0.35809	0.455463	0.735833
NCU00549	0	446.199	-0.804601	0.0167403	0.0359048		446.199	-0.0511923	0.87767	0.916512		446.199	0.0772652	0.816332	0.876636		446.199	0.397373	0.230657	0.427108		446.199	0.367207	0.264864	0.431274		446.199	0.58664	0.0757591	0.290707
NCU00550	0	441.606	0.0196537	0.90904	0.943874		441.606	-0.234388	0.175792	0.282257		441.606	-0.334139	0.0560186	0.116918		441.606	0.175224	0.30647	0.513108		441.606	-0.322084	0.0558018	0.140123		441.606	-0.437059	0.0114921	0.0912954
NCU00551	0	1663.01	-1.70626	2.1885e-08	2.08473e-07		1663.01	-0.775935	0.0104775	0.0302451		1663.01	-0.73503	0.0153671	0.0423411		1663.01	0.407372	0.177661	0.35868		1663.01	-0.212453	0.481645	0.64019		1663.01	-0.479687	0.112914	0.363504
NCU00552	0	9693.45	-5.34239	1.5569e-15	5.27199e-14	down	9693.45	-3.70276	3.10165e-08	5.03961e-07	down	9693.45	-3.1974	1.74484e-06	1.92783e-05	down	9693.45	-0.83922	0.209301	0.402194		9693.45	-1.8873	0.0047505	0.0200046		9693.45	-1.87234	0.00509667	0.0542454
NCU00553	0	880.025	-0.812109	2.18536e-12	4.46531e-11		880.025	-0.367235	0.00112341	0.00476708		880.025	-0.636612	3.14914e-08	5.49018e-07		880.025	-0.0508327	0.649185	0.800007		880.025	-0.113574	0.294712	0.464591		880.025	-0.479985	1.87607e-05	0.00096629
NCU00554	0	2254.36	1.8089	3.04423e-07	2.31899e-06		2254.36	1.49599	2.2983e-05	0.000174524		2254.36	1.53686	1.36884e-05	0.000116575		2254.36	0.914911	0.00969335	0.0432922		2254.36	1.25621	0.000373716	0.00243425		2254.36	0.585861	0.0976587	0.334537
NCU00556	0	490.025	-0.452621	0.137044	0.213995		490.025	-0.831012	0.00653191	0.0205884		490.025	-0.831788	0.00659575	0.021418		490.025	-0.428696	0.159061	0.332212		490.025	-0.53447	0.0766393	0.177353		490.025	-0.373458	0.218221	0.511449
NCU00557	0	0.440671	-1.95656	0.702722	0.792207		0.440671	-2.02721	0.692551	1		0.440671	-1.87217	0.714995	1		0.440671	-0.463583	0.927908	1		0.440671	-3.15054	0.538889	1		0.440671	0.0931867	0.985223	1
NCU00558	0	47.8128	-1.83328	6.36529e-06	3.63519e-05		47.8128	-1.06574	0.00412214	0.0139732		47.8128	-1.26491	0.000990007	0.00452699		47.8128	-0.810223	0.0271458	0.0931374		47.8128	-0.962471	0.00515765	0.0213629		47.8128	-0.768134	0.0314372	0.174264
NCU00559	0	92.4389	-2.08532	0.000119652	0.000488757	down	92.4389	-0.969144	0.0630141	0.127397		92.4389	-1.34984	0.0106748	0.0314829		92.4389	-0.790427	0.128766	0.286872		92.4389	-0.909538	0.0755958	0.175838		92.4389	-0.248161	0.628672	0.839749
NCU00560	0	178.687	-0.729944	6.13277e-05	0.000273732		178.687	-0.801367	1.08731e-05	9.23223e-05		178.687	-0.897015	1.57882e-06	1.76049e-05		178.687	-0.773805	2.45876e-05	0.000344825		178.687	-0.848201	4.80942e-07	8.25447e-06		178.687	-0.0596617	0.724729	0.887731
NCU00561	0	72.0111	-1.11131	0.00366317	0.00961231		72.0111	-1.33718	0.0005424	0.0026229		72.0111	-1.64882	4.01775e-05	0.000295694		72.0111	-0.853203	0.0236533	0.0847503		72.0111	-0.961558	0.00753252	0.0291889		72.0111	0.310864	0.382863	0.683191
NCU00562	0	532.244	0.189825	0.361969	0.476191		532.244	0.121577	0.55932	0.669441		532.244	0.505095	0.014817	0.0411329		532.244	0.441639	0.0331387	0.108412		532.244	0.579807	0.00446284	0.0190493		532.244	0.106696	0.606804	0.827572
NCU00563	0	15.6462	1.16472	0.00716994	0.0172075		15.6462	0.607379	0.181216	0.289127		15.6462	0.0225805	0.96399	0.978829		15.6462	0.0341006	0.945102	0.97496		15.6462	0.301667	0.474731	0.633954		15.6462	-0.541232	0.292418	0.598179
NCU00564	0	649.389	-0.77189	1.26002e-06	8.33319e-06		649.389	0.0525143	0.733939	0.811748		649.389	-0.228742	0.143791	0.242313		649.389	-0.437541	0.0054157	0.0276472		649.389	-0.172101	0.257069	0.422216		649.389	0.267652	0.0801812	0.301252
NCU00565	0	680.987	1.06109	0.00689439	0.0166504		680.987	0.854207	0.029693	0.069654		680.987	0.776628	0.0482544	0.103827		680.987	0.2259	0.566488	0.743038		680.987	0.411174	0.294466	0.464434		680.987	-0.239891	0.543004	0.793818
NCU00566	0	1176.4	-0.352445	0.087493	0.147432		1176.4	-0.330017	0.109267	0.196463		1176.4	-0.383625	0.0632251	0.128647		1176.4	-0.140404	0.49526	0.68653		1176.4	-0.205886	0.313716	0.484095		1176.4	-0.177907	0.386351	0.685347
NCU00567	0	2398.61	1.99676	6.07925e-09	6.41782e-08		2398.61	2.32769	1.19247e-11	3.73657e-10	up	2398.61	2.17788	2.25731e-10	5.97375e-09	up	2398.61	1.55465	6.06633e-06	0.000105527		2398.61	1.93482	1.70434e-08	4.37927e-07		2398.61	0.392992	0.253689	0.551153
NCU00568	0	224.811	-1.6228	5.48257e-10	7.18734e-09		224.811	-0.828654	0.000925474	0.0040617		224.811	-1.30631	4.05777e-07	5.22076e-06		224.811	-0.280912	0.254116	0.454965		224.811	-0.414089	0.0853386	0.192524		224.811	-0.502611	0.0406754	0.202394
NCU00569	0	163.706	-0.734311	0.000476987	0.00163424		163.706	-0.256928	0.201892	0.31357		163.706	-0.77413	0.000272506	0.00152255		163.706	-0.391717	0.055721	0.158969		163.706	-0.255481	0.179572	0.32706		163.706	0.156314	0.420561	0.709242
NCU00570	0	107.709	-0.114589	0.780352	0.853334		107.709	-0.349897	0.3964	0.521008		107.709	-0.377986	0.361911	0.489807		107.709	-0.471209	0.256217	0.457312		107.709	-0.669352	0.0992904	0.213151		107.709	-0.571624	0.165764	0.443385
NCU00571	0	551.655	-1.28158	2.96826e-08	2.76432e-07		551.655	-0.745602	0.00106719	0.00456797		551.655	-0.565349	0.0130463	0.0370879		551.655	-0.304193	0.179223	0.36099		551.655	-0.395601	0.0769671	0.177813		551.655	-0.432513	0.0554399	0.240703
NCU00572	0	25.1169	-0.536738	0.194684	0.287068		25.1169	-0.841246	0.0493073	0.104791		25.1169	-1.40067	0.00377267	0.0135998		25.1169	0.238941	0.529084	0.712396		25.1169	-0.0143496	0.967563	0.98133		25.1169	0.125847	0.735217	0.890514
NCU00573	0	3290.25	-2.26635	5.51632e-06	3.18792e-05	down	3290.25	-1.38554	0.00542165	0.0176054		3290.25	-1.66808	0.000817912	0.00384345		3290.25	-1.11368	0.0253849	0.0890013		3290.25	-1.34715	0.006822	0.0269315		3290.25	-1.25862	0.0115134	0.0912954
NCU00574	0	3.94415	-3.44786	0.0329516	0.0641949		3.94415	-1.1904	0.234926	0.351831		3.94415	-3.37394	0.0373737	0.0853607		3.94415	-1.8359	0.105179	0.249492		3.94415	-1.89234	0.0460811	0.121803		3.94415	0.262285	0.757256	0.899545
NCU00575	0	4375.38	-1.33087	0.00913001	0.0212258		4375.38	-0.358965	0.481641	0.601898		4375.38	-0.26803	0.599308	0.703217		4375.38	-0.516915	0.310979	0.518378		4375.38	-0.276881	0.587164	0.728924		4375.38	0.3779	0.458687	0.738229
NCU00576	0	326.198	0.119589	0.497207	0.611884		326.198	0.0896413	0.610235	0.711779		326.198	0.0126134	0.943427	0.96404		326.198	-0.0411364	0.816958	0.904213		326.198	0.0249352	0.883414	0.932581		326.198	0.241413	0.163494	0.440857
NCU00577	0	204.465	-0.348825	0.0605225	0.107945		204.465	-0.612576	0.00114669	0.00483312		204.465	-0.516814	0.00630073	0.0206396		204.465	-0.866012	7.87414e-06	0.000132044		204.465	-0.678202	0.000135607	0.0010297		204.465	-0.110901	0.538357	0.791437
NCU00578	0	73.9278	0.850536	0.0509361	0.0931173		73.9278	1.39962	0.00110186	0.00468914		73.9278	1.00944	0.0202368	0.0528428		73.9278	0.974457	0.0249064	0.0879295		73.9278	1.03239	0.0148133	0.0493164		73.9278	-0.296939	0.510183	0.772225
NCU00579	0	1072.5	-0.862372	4.88171e-10	6.44373e-09		1072.5	-0.526997	0.000118787	0.000714256		1072.5	-0.442717	0.00124961	0.00550067		1072.5	-0.385697	0.00480214	0.0250772		1072.5	-0.461887	0.000567633	0.00343887		1072.5	0.0407268	0.762411	0.902729
NCU00580	0	142.518	-0.194702	0.33592	0.448973		142.518	0.31137	0.106445	0.192525		142.518	0.241115	0.219021	0.334886		142.518	-0.0661632	0.741351	0.860891		142.518	-0.188637	0.309989	0.480363		142.518	0.29618	0.119165	0.37252
NCU00581	0	165.37	0.020543	0.930722	0.958322		165.37	0.465193	0.0444785	0.096501		165.37	-0.798342	0.00139123	0.00601324		165.37	-0.549515	0.0245155	0.0870813		165.37	-0.553176	0.0164906	0.0537267		165.37	0.173743	0.453819	0.734981
NCU00582	0	3968.07	-6.62397	4.6682e-29	6.21324e-27	down	3968.07	-4.81263	1.78966e-16	1.24557e-14	down	3968.07	-5.00331	1.22667e-17	9.94726e-16	down	3968.07	-1.9129	0.00101149	0.00710998		3968.07	-2.94727	4.07749e-07	7.20819e-06	down	3968.07	-1.07937	0.0635066	0.26236
NCU00583	0	0.0817161	-0.61161	0.907937	0.943183		0.0817161	-0.682166	0.897381	1		0.0817161	-0.527127	0.920615	1		0.0817161	-0.582217	0.91235	1		0.0817161	-1.8055	0.732841	1		0.0817161	-0.915074	0.862648	1
NCU00584	0	1062.65	-1.85043	7.72247e-11	1.18016e-09		1062.65	-1.4155	5.63298e-07	6.92915e-06		1062.65	-1.1967	2.31103e-05	0.000183863		1062.65	-0.318725	0.256813	0.457871		1062.65	-0.736271	0.00861919	0.03228		1062.65	-0.749852	0.00766342	0.0706194
NCU00585	0	10021.4	-4.87658	1.5478e-18	8.01759e-17	down	10021.4	-2.83868	2.94857e-07	3.88411e-06	down	10021.4	-2.30669	3.09131e-05	0.000236368	down	10021.4	-0.429473	0.437697	0.63483		10021.4	-1.47351	0.00774978	0.0298759		10021.4	-1.3886	0.0121039	0.0941862
NCU00586	0	527.516	-3.4338	1.75966e-17	7.77088e-16	down	527.516	-2.02449	2.35071e-07	3.1966e-06	down	527.516	-1.93984	7.45888e-07	8.96993e-06		527.516	-0.225532	0.559955	0.738612		527.516	-0.923201	0.0168463	0.054549		527.516	-1.82307	2.92327e-06	0.000210792
NCU00587	0	753.68	-0.645157	0.00787186	0.0186769		753.68	-0.484251	0.0454422	0.0981823		753.68	-0.330078	0.172674	0.27897		753.68	-0.190563	0.430119	0.627944		753.68	-0.177273	0.459096	0.621671		753.68	-0.421107	0.0809416	0.302858
NCU00589	0	1280.6	-1.06257	1.0049e-11	1.77047e-10		1280.6	-0.733518	2.18854e-06	2.26252e-05		1280.6	-0.683214	1.07035e-05	9.30265e-05		1280.6	-0.440095	0.00436969	0.023254		1280.6	-0.585753	0.000124105	0.000957214		1280.6	-0.719009	3.16117e-06	0.000222387
NCU00590	0	463.498	-0.561905	0.000576071	0.00191884		463.498	-0.120693	0.448219	0.571937		463.498	0.0820958	0.605196	0.708802		463.498	0.0134696	0.932443	0.969243		463.498	0.0621241	0.685165	0.805225		463.498	0.572282	0.000211212	0.00627415
NCU00591	0	362.192	-0.703762	0.0527736	0.0960003		362.192	0.572373	0.106526	0.192593		362.192	2.02672	7.87907e-09	1.53062e-07	up	362.192	0.892676	0.0116313	0.0493639		362.192	0.913287	0.00925757	0.0340548		362.192	0.755107	0.0325143	0.177741
NCU00592	0	169.694	-0.0415934	0.896825	0.936886		169.694	-0.445128	0.16882	0.27405		169.694	-0.429737	0.185799	0.295048		169.694	-0.657581	0.0440744	0.133929		169.694	-0.476579	0.132066	0.262499		169.694	-0.446391	0.165029	0.442625
NCU00593	0	356.755	-0.901957	3.23804e-09	3.59978e-08		356.755	-0.375799	0.009808	0.0286683		356.755	-0.423669	0.00408983	0.0145006		356.755	-0.153701	0.287045	0.491063		356.755	-0.180663	0.187342	0.33691		356.755	0.00144365	0.991812	0.997806
NCU00594	0	0.492746	-2.11165	0.582029	0.691322		0.492746	-2.18226	0.569492	1		0.492746	-0.538289	0.888115	1		0.492746	-0.622037	0.871065	1		0.492746	-3.3056	0.38891	1		0.492746	-0.999085	0.794214	1
NCU00595	0	859.138	-1.9723	9.77302e-10	1.21788e-08		859.138	-1.05567	0.000950041	0.00414278		859.138	-1.04494	0.00108363	0.00488433		859.138	-0.765024	0.016478	0.0650179		859.138	-1.03447	0.00112586	0.00609408		859.138	0.127509	0.687839	0.868886
NCU00596	0	395.745	-1.99809	1.99023e-09	2.32183e-08		395.745	-2.34656	2.76257e-12	9.88598e-11	down	395.745	-2.03376	1.15663e-09	2.71178e-08	down	395.745	-1.41385	1.73948e-05	0.000258177		395.745	-1.67894	2.38673e-07	4.48858e-06		395.745	0.52167	0.105538	0.349341
NCU00597	0	125.733	1.48731	7.78308e-05	0.000336576		125.733	0.893967	0.0184398	0.047622		125.733	0.564222	0.140763	0.238171		125.733	-0.37897	0.336097	0.543815		125.733	-0.356919	0.347864	0.517661		125.733	-0.653218	0.0965487	0.332223
NCU00598	0	188.597	-1.27632	2.3004e-08	2.17618e-07		188.597	-0.882953	6.41984e-05	0.000428264		188.597	-0.95004	2.2644e-05	0.000180968		188.597	-0.906897	4.64785e-05	0.000594938		188.597	-0.816121	9.62074e-05	0.00077731		188.597	0.122811	0.556678	0.799559
NCU00599	0	155.791	1.07319	0.00352755	0.00930484		155.791	0.289673	0.436523	0.561139		155.791	0.72159	0.0513285	0.108904		155.791	-0.0478214	0.898858	0.951121		155.791	-0.0275255	0.940281	0.965514		155.791	-0.0077693	0.983373	0.994874
NCU00600	0	1481.34	-1.22091	3.60873e-20	2.26029e-18		1481.34	-1.34613	4.25053e-24	8.16748e-22		1481.34	-1.03353	5.74088e-15	3.19143e-13		1481.34	-0.874515	3.0602e-11	2.38558e-09		1481.34	-0.985326	2.45741e-14	1.77045e-12		1481.34	0.125562	0.330147	0.636633
NCU00602	0	221.721	0.00398774	0.994319	0.99922		221.721	0.393808	0.480647	0.601081		221.721	0.8939	0.108787	0.195879		221.721	-0.218611	0.696902	0.835567		221.721	0.303649	0.585016	0.726973		221.721	-0.223859	0.689216	0.870118
NCU00603	0	0.191606	2.19496	0.678578	0.772991		0.191606	0	1	1		0.191606	2.28189	0.666649	1		0.191606	0	1	1		0.191606	0.984073	0.852546	1		0.191606	0	1	1
NCU00604	0	266.898	1.95885	3.40645e-06	2.06909e-05		266.898	0.560585	0.188596	0.297307		266.898	2.30384	4.51874e-08	7.55032e-07	up	266.898	-0.0809868	0.851108	0.923478		266.898	1.11165	0.00829254	0.0313909		266.898	-1.06526	0.0151563	0.109633
NCU00605	0	152.074	-0.197745	0.337287	0.450295		152.074	0.277763	0.162118	0.266103		152.074	-0.0421463	0.837084	0.890968		152.074	-0.48746	0.0213125	0.0786678		152.074	-0.384881	0.0474335	0.1243		152.074	-0.118671	0.554202	0.799457
NCU00606	0	5.85421	0.530599	0.599798	0.707778		5.85421	1.83404	0.0508986	0.107501		5.85421	0.0389363	0.970842	0.982289		5.85421	1.35428	0.159289	0.332288		5.85421	-0.380078	0.701342	0.817979		5.85421	-4.40325	0.0094129	0.0800883
NCU00607	0	579.938	-10.7961	4.76235e-06	2.7993e-05	down	579.938	-11.8965	3.28492e-06	3.20833e-05	down	579.938	-10.6608	5.83465e-06	5.51577e-05	down	579.938	-10.2042	8.16066e-06	0.000136321	down	579.938	-14.4337	1.97441e-08	4.98624e-07	down	579.938	-9.01906	3.66635e-05	0.00165234	down
NCU00608	0	291.064	-1.81544	0.0022036	0.00615659		291.064	-0.561624	0.338225	0.462638		291.064	-0.586896	0.317411	0.443994		291.064	-0.473258	0.419683	0.619274		291.064	-0.571412	0.327906	0.497829		291.064	0.37952	0.515763	0.776256
NCU00609	0	278.194	-1.09474	5.69886e-07	4.08163e-06		278.194	-0.691165	0.00122376	0.00510708		278.194	-0.316004	0.135767	0.231893		278.194	-0.31141	0.140647	0.305861		278.194	-0.339971	0.097224	0.210647		278.194	-0.63556	0.00263164	0.0354146
NCU00611	0	227.992	-0.0112908	0.971306	0.987065		227.992	-0.344762	0.274805	0.394575		227.992	0.20743	0.507632	0.625012		227.992	-0.39475	0.212793	0.406011		227.992	-0.312722	0.312667	0.483157		227.992	0.0279033	0.928735	0.97363
NCU00614	0	1124.48	-1.16529	4.76035e-11	7.56524e-10		1124.48	-0.29231	0.0931056	0.173987		1124.48	-0.507406	0.00374701	0.0135183		1124.48	-0.0705854	0.684629	0.826118		1124.48	-0.154151	0.370405	0.541427		1124.48	-0.24338	0.160612	0.437588
NCU00616	0	76.2029	-0.890722	0.00458581	0.0116815		76.2029	-0.664963	0.0295746	0.0694773		76.2029	-0.681523	0.028117	0.068239		76.2029	-0.286492	0.337617	0.54514		76.2029	-0.0302795	0.913051	0.949265		76.2029	0.504083	0.0725915	0.282594
NCU00617	0	347.444	-0.0018261	0.991692	0.997555		347.444	0.426657	0.0128939	0.0357718		347.444	0.266676	0.124969	0.217312		347.444	0.37029	0.031938	0.105757		347.444	0.353668	0.0338596	0.0957711		347.444	0.166955	0.330981	0.637081
NCU00618	0	14059.6	0.507056	0.0297593	0.0588007		14059.6	-0.0940233	0.687037	0.774978		14059.6	0.110188	0.636814	0.735886		14059.6	-0.394251	0.0912502	0.22579		14059.6	-0.254704	0.274897	0.443187		14059.6	-0.065354	0.779419	0.91275
NCU00619	0	429.272	-0.509112	0.0827471	0.140661		429.272	-0.367418	0.209199	0.322257		429.272	-0.598228	0.0420483	0.0932885		429.272	-0.337721	0.248802	0.44834		429.272	-0.185942	0.520372	0.673335		429.272	-0.268683	0.356576	0.659503
NCU00620	0	104.256	-0.204172	0.556226	0.667123		104.256	-0.063258	0.854218	0.902678		104.256	-0.0320008	0.926266	0.952375		104.256	-0.0999733	0.772592	0.878448		104.256	-0.330602	0.325822	0.496114		104.256	-0.320625	0.352089	0.654624
NCU00621	0	563.383	0.264069	0.0990358	0.163829		563.383	0.22499	0.159525	0.26278		563.383	0.379582	0.0176258	0.0472411		563.383	0.226025	0.158848	0.331847		563.383	0.117543	0.452238	0.616673		563.383	0.253942	0.109729	0.356835
NCU00622	0	911.39	-1.44092	2.91756e-16	1.09215e-14		911.39	-1.07263	7.49915e-10	1.71279e-08		911.39	-1.02645	4.20481e-09	8.87024e-08		911.39	-0.804737	3.5749e-06	6.85889e-05		911.39	-0.979567	1.02441e-08	2.73559e-07		911.39	-0.311219	0.0695002	0.277264
NCU00623	0	267.175	-0.325856	0.0733295	0.126547		267.175	-0.0978549	0.584339	0.691336		267.175	0.131723	0.459706	0.580959		267.175	0.0207196	0.90768	0.95689		267.175	-0.0815185	0.634075	0.765759		267.175	-0.379196	0.0344677	0.183651
NCU00624	0	396.684	-0.550571	0.00127365	0.00380232		396.684	-0.221726	0.186453	0.29514		396.684	-0.277373	0.101416	0.185512		396.684	-0.124607	0.457792	0.651954		396.684	-0.300147	0.0651233	0.157317		396.684	-0.346914	0.0379041	0.193951
NCU00627	0	7105.82	-2.25045	1.00505e-11	1.77047e-10	down	7105.82	-1.59548	1.37281e-06	1.5055e-05		7105.82	-1.52704	3.8112e-06	3.7936e-05		7105.82	-1.44823	1.16835e-05	0.000181503		7105.82	-1.57241	1.9139e-06	2.7024e-05		7105.82	-1.56673	2.10719e-06	0.000161358
NCU00628	0	408.409	0.279561	0.289436	0.3984		408.409	0.0336636	0.898781	0.930903		408.409	0.466711	0.0765286	0.149687		408.409	0.174839	0.508516	0.696784		408.409	0.0920453	0.724352	0.831982		408.409	0.0540563	0.837517	0.935825
NCU00629	0	6837.91	-0.835563	0.00228534	0.00635164		6837.91	-0.428338	0.117674	0.207651		6837.91	-0.424332	0.121204	0.212311		6837.91	-0.26724	0.328953	0.536621		6837.91	-0.243808	0.372752	0.543509		6837.91	0.033364	0.902949	0.96397
NCU00630	0	66.0476	-0.567456	0.0989203	0.163723		66.0476	0.0209326	0.949332	0.966945		66.0476	-0.142885	0.670331	0.76285		66.0476	-0.368568	0.277719	0.481434		66.0476	-0.357305	0.26254	0.428786		66.0476	-0.157802	0.630904	0.841173
NCU00631	0	481.686	-2.45433	1.15833e-23	1.03741e-21	down	481.686	-1.87172	4.81393e-15	2.74518e-13		481.686	-2.29796	4.60536e-21	5.89954e-19	down	481.686	-1.22898	1.8537e-07	5.54914e-06		481.686	-1.85372	1.94138e-15	1.61885e-13		481.686	-0.650345	0.00513173	0.0544919
NCU00632	0	429.279	-0.616684	0.00368198	0.00963528		429.279	-0.741971	0.000486404	0.0023965		429.279	-0.799145	0.000190683	0.00113958		429.279	-0.097665	0.641392	0.79444		429.279	-0.407014	0.0488266	0.126972		429.279	-0.151721	0.466899	0.743609
NCU00633	0	1351.43	-0.279896	0.109433	0.178111		1351.43	-0.143725	0.409816	0.534553		1351.43	-0.106766	0.540964	0.654473		1351.43	0.621884	0.000330115	0.00287373		1351.43	0.3838	0.0258462	0.0772298		1351.43	-0.332894	0.056118	0.242431
NCU00634	0	11272.9	0.90706	2.98475e-05	0.00014424		11272.9	0.458189	0.0350125	0.0797618		11272.9	0.644203	0.00303494	0.0114201		11272.9	0.0862897	0.691465	0.831468		11272.9	0.25569	0.239159	0.401887		11272.9	-0.111813	0.607027	0.827572
NCU00635	0	5855.86	0.875493	2.53082e-05	0.000123992		5855.86	0.513732	0.0134914	0.0371728		5855.86	0.718522	0.000548961	0.00278386		5855.86	0.0948855	0.648497	0.799465		5855.86	0.354558	0.0878241	0.196277		5855.86	0.136418	0.511905	0.773309
NCU00636	0	3955.43	0.0137605	0.941635	0.965998		3955.43	0.316954	0.0913116	0.171287		3955.43	0.489261	0.00914412	0.0279284		3955.43	0.223627	0.233799	0.431633		3955.43	0.33667	0.0722177	0.169769		3955.43	0.0635977	0.73477	0.890412
NCU00638	0	28.7484	0.93797	0.210512	0.306866		28.7484	-1.28952	0.10491	0.190372		28.7484	0.0306109	0.967979	0.980925		28.7484	-1.77331	0.0312653	0.103936		28.7484	-1.12874	0.137742	0.270435		28.7484	-0.835471	0.279801	0.583121
NCU00640	0	12.2197	-0.523121	0.344461	0.457578		12.2197	-0.605091	0.274908	0.394595		12.2197	0.196127	0.701834	0.788147		12.2197	-1.98578	0.00633468	0.031233		12.2197	-0.754607	0.128463	0.257601		12.2197	-0.32669	0.529691	0.785187
NCU00641	0	28.8381	-0.433295	0.341067	0.45414		28.8381	0.2889	0.496613	0.614792		28.8381	-0.0152928	0.972314	0.98344		28.8381	-0.204674	0.646373	0.797585		28.8381	-0.0712909	0.860965	0.919757		28.8381	0.247963	0.554528	0.799457
NCU00642	0	1533.86	-5.88424	1.55633e-15	5.27199e-14	down	1533.86	-3.53719	1.04865e-06	1.19039e-05	down	1533.86	-3.10913	1.7491e-05	0.000144624	down	1533.86	-1.43924	0.0462518	0.138738		1533.86	-2.1046	0.00355095	0.0157723	down	1533.86	-0.107475	0.881596	0.954661
NCU00643	0	247.96	-3.31955	1.26024e-05	6.67971e-05	down	247.96	-2.2832	0.0022691	0.00851431	down	247.96	-2.09525	0.00507448	0.0173711	down	247.96	-1.71246	0.0215195	0.079204		247.96	-1.72489	0.0198506	0.0621756		247.96	0.925474	0.209943	0.501402
NCU00644	0	1675.09	0.580695	0.0627617	0.111009		1675.09	0.347838	0.265178	0.384373		1675.09	0.598793	0.0550366	0.115141		1675.09	-0.0297823	0.9241	0.966313		1675.09	0.211484	0.497357	0.6533		1675.09	-0.375935	0.229166	0.522078
NCU00646	0	113.319	2.51172	9.79807e-14	2.53086e-12	up	113.319	2.0923	7.6863e-10	1.75101e-08	up	113.319	2.35688	3.69783e-12	1.26687e-10	up	113.319	1.77263	2.62122e-07	7.48563e-06		113.319	1.84535	3.42783e-08	7.95238e-07		113.319	0.342465	0.344864	0.648578
NCU00648	0	19.3222	0.83231	0.0419281	0.0790161		19.3222	-0.0138348	0.975097	0.985015		19.3222	-0.443849	0.35606	0.483964		19.3222	0.182663	0.676692	0.820086		19.3222	0.0461046	0.907489	0.946603		19.3222	-0.755172	0.112061	0.361816
NCU00649	0	497.49	0.98693	9.46762e-07	6.45293e-06		497.49	0.450783	0.0264398	0.0637136		497.49	0.35729	0.0802525	0.155287		497.49	0.382425	0.0606482	0.169014		497.49	0.57365	0.00401273	0.0174404		497.49	0.505938	0.0122249	0.094912
NCU00650	0	245.302	1.89441	0.00108374	0.00330958		245.302	0.896167	0.123294	0.214993		245.302	1.28795	0.0266211	0.0654464		245.302	-0.223985	0.702528	0.839148		245.302	-0.0810336	0.889105	0.936525		245.302	-0.800208	0.173621	0.455116
NCU00651	0	412.356	-0.0319075	0.932979	0.960337		412.356	-0.171558	0.651296	0.745797		412.356	-0.661415	0.0830322	0.159444		412.356	-1.10781	0.00385004	0.0209393		412.356	-0.593479	0.116603	0.240582		412.356	-0.953015	0.0124241	0.0954761
NCU00652	0	96.5271	-1.61184	3.40711e-06	2.06909e-05		96.5271	-1.23612	0.000218245	0.00119818		96.5271	-0.798604	0.0148742	0.0412012		96.5271	0.0755394	0.809503	0.899067		96.5271	-0.308725	0.313089	0.483388		96.5271	-0.155651	0.618148	0.833282
NCU00653	0	25.8552	-1.47582	0.0134184	0.0295605		25.8552	-1.97775	0.00168884	0.00667307		25.8552	-0.228769	0.672099	0.764352		25.8552	-0.25262	0.639564	0.793234		25.8552	-0.493766	0.3384	0.508521		25.8552	0.46557	0.365586	0.667581
NCU00654	0	264.14	-1.84811	9.16231e-10	1.15226e-08		264.14	-1.89686	3.18888e-10	7.80789e-09		264.14	-1.88761	4.82201e-10	1.21776e-08		264.14	-1.53744	2.70804e-07	7.70811e-06		264.14	-1.50525	2.34314e-07	4.42544e-06		264.14	-0.590305	0.0425436	0.207164
NCU00655	0	569.05	-0.810744	7.06611e-05	0.000310048		569.05	0.456614	0.0203497	0.0518003		569.05	0.52336	0.00793045	0.0248967		569.05	0.320009	0.105461	0.249946		569.05	0.477147	0.014003	0.0470798		569.05	0.156584	0.426826	0.713825
NCU00656	0	433.497	-0.417417	0.0476126	0.0878967		433.497	-0.0634913	0.760449	0.830546		433.497	-0.570017	0.00729898	0.0232154		433.497	0.253979	0.220261	0.414601		433.497	0.024997	0.902481	0.943905		433.497	0.378503	0.0654463	0.266874
NCU00657	0	148.692	0.747551	0.00290191	0.00783795		148.692	0.822724	0.000985104	0.00425579		148.692	0.264247	0.305108	0.431496		148.692	0.145211	0.574388	0.749198		148.692	0.405343	0.0976883	0.211157		148.692	0.345517	0.17038	0.450857
NCU00658	0	56.3919	-1.29515	0.00564947	0.013998		56.3919	-0.876242	0.0527589	0.110454		56.3919	-0.407565	0.35927	0.486865		56.3919	0.358957	0.404185	0.606137		56.3919	0.0590251	0.888591	0.936256		56.3919	-0.335352	0.441472	0.725957
NCU00659	0	117.39	-1.77916	1.75872e-05	8.96958e-05		117.39	-0.908503	0.0230965	0.0571731		117.39	-1.17797	0.00365783	0.013229		117.39	-0.444341	0.262138	0.463955		117.39	-1.03443	0.00828365	0.0313841		117.39	-0.997342	0.0122901	0.0950375
NCU00660	0	293.775	-0.120736	0.485419	0.60147		293.775	0.473449	0.00451154	0.0150368		293.775	0.355152	0.0355879	0.0822384		293.775	0.349315	0.0382089	0.120733		293.775	0.522926	0.00111372	0.00604306		293.775	0.105411	0.529835	0.785187
NCU00662	0	83.1146	0.364336	0.12336	0.196177		83.1146	-0.163324	0.50749	0.624576		83.1146	0.213805	0.375456	0.502903		83.1146	-0.278433	0.269439	0.472338		83.1146	-0.0600277	0.789555	0.87474		83.1146	0.0506079	0.830668	0.934079
NCU00663	0	224.888	-1.20249	0.000157763	0.000619102		224.888	0.209441	0.490421	0.609167		224.888	-0.388419	0.209218	0.323856		224.888	0.261531	0.389546	0.594069		224.888	-0.0929172	0.756819	0.853606		224.888	0.73176	0.0148105	0.107784
NCU00664	0	368.532	-1.16671	2.98797e-11	4.87798e-10		368.532	-0.318137	0.056717	0.116559		368.532	-0.380821	0.0238519	0.0601375		368.532	-0.916	1.18483e-07	3.8181e-06		368.532	-0.578881	0.000365985	0.00238816		368.532	-0.2804	0.0897266	0.319245
NCU00665	0	571.422	-0.750887	0.101672	0.167611		571.422	0.243962	0.592586	0.697347		571.422	-0.221434	0.628239	0.728168		571.422	0.723691	0.111962	0.26033		571.422	0.301039	0.507713	0.662877		571.422	1.28385	0.00472178	0.0513286
NCU00666	0	109.395	-1.24134	6.50249e-05	0.000288889		109.395	-1.31815	2.2493e-05	0.000171098		109.395	-1.71591	1.30279e-07	1.88776e-06		109.395	-0.781165	0.00987062	0.0438002		109.395	-1.12819	0.000111059	0.000871805		109.395	0.108015	0.708614	0.880982
NCU00667	0	1261.05	-2.1224	3.73748e-56	3.25602e-53	down	1261.05	-1.53133	1.00696e-31	3.86978e-29		1261.05	-1.692	1.77024e-37	1.30393e-34		1261.05	-1.139	1.36472e-18	3.1076e-16		1261.05	-1.35583	9.89398e-27	3.49812e-24		1261.05	-0.107323	0.394595	0.689674
NCU00668	0	1212.21	-1.38926	4.07632e-06	2.43234e-05		1212.21	-1.19543	7.14888e-05	0.000469806		1212.21	-1.14365	0.000146486	0.000907986		1212.21	-0.790574	0.00852288	0.0393956		1212.21	-0.96231	0.00131163	0.00695473		1212.21	-0.623115	0.0377506	0.193708
NCU00669	0	799.447	-0.268032	0.183497	0.273604		799.447	0.0988593	0.621583	0.721209		799.447	-0.131647	0.513223	0.629893		799.447	-0.0668781	0.739315	0.85962		799.447	-0.0011495	0.995379	0.998282		799.447	-0.446138	0.0265403	0.157082
NCU00670	0	1380.64	-1.43008	1.57799e-22	1.27074e-20		1380.64	-0.375503	0.00829195	0.0251174		1380.64	-0.517624	0.000296465	0.00163065		1380.64	-0.185039	0.192567	0.379736		1380.64	-0.272593	0.0517757	0.132771		1380.64	0.303964	0.0305406	0.171826
NCU00671	0	933.513	-1.26174	2.63027e-09	2.99357e-08		933.513	-0.372303	0.0745732	0.14583		933.513	-0.494999	0.0181403	0.0483396		933.513	-0.204198	0.327702	0.535828		933.513	-0.403738	0.0511269	0.131369		933.513	-0.403738	0.0526526	0.234123
NCU00673	0	10727.4	-1.07214	0.00813244	0.0192285		10727.4	-0.625205	0.122685	0.214359		10727.4	-0.680206	0.0930984	0.173927		10727.4	0.110983	0.784039	0.88512		10727.4	-0.105683	0.794084	0.877688		10727.4	-0.0501343	0.90147	0.96349
NCU00674	0	26.5056	-1.20275	0.0109341	0.024777		26.5056	-0.953506	0.0336839	0.0771925		26.5056	0.805106	0.0330367	0.0777069		26.5056	0.247795	0.528667	0.712215		26.5056	-0.0308291	0.933143	0.961424		26.5056	-0.676201	0.106433	0.351246
NCU00675	0	143.843	0.238582	0.40067	0.517539		143.843	-0.476017	0.101135	0.185079		143.843	-0.342053	0.23916	0.358842		143.843	-0.776385	0.00870216	0.0399256		143.843	-0.862969	0.00230885	0.0111033		143.843	-0.388223	0.175837	0.45884
NCU00676	0	143.43	1.6687	0.001154	0.00349519		143.43	1.14158	0.0267286	0.0641866		143.43	1.28795	0.0124406	0.0356097		143.43	0.421158	0.418304	0.618099		143.43	0.703911	0.169799	0.314209		143.43	-0.481122	0.360371	0.662883
NCU00677	0	77.6783	-1.89239	0.000584756	0.00194303		77.6783	-1.5169	0.00505502	0.0165633		77.6783	-1.27973	0.0177066	0.0473838		77.6783	-1.12189	0.0364069	0.116419		77.6783	-1.19241	0.0229646	0.0698982		77.6783	-0.30785	0.557157	0.799559
NCU00678	0	135.194	-1.49763	0.000413617	0.00144713		135.194	-1.43881	0.000653989	0.00305852		135.194	-0.370975	0.367966	0.495573		135.194	-0.220669	0.590896	0.761206		135.194	-0.690103	0.0895197	0.199211		135.194	-0.822721	0.0461491	0.217497
NCU00679	0	13.6423	1.92348	2.27723e-05	0.000113013		13.6423	0.169473	0.75152	0.824973		13.6423	0.686729	0.178574	0.286152		13.6423	-1.3009	0.07023	0.187468		13.6423	0.353321	0.448243	0.612841		13.6423	-0.0599591	0.910765	0.966809
NCU00680	0	2916.72	0.797131	0.00294253	0.00793423		2916.72	1.60901	1.81937e-09	3.84723e-08		2916.72	2.099	4.23106e-15	2.38206e-13	up	2916.72	1.08428	5.17701e-05	0.000651115		2916.72	1.46249	4.46484e-08	1.0224e-06		2916.72	-0.058729	0.826895	0.93275
NCU00681	0	386.615	-0.737731	8.70258e-06	4.79017e-05		386.615	-0.509135	0.00180145	0.00702074		386.615	-0.224707	0.165564	0.270053		386.615	-0.154245	0.33838	0.545964		386.615	-0.523396	0.000821341	0.00468827		386.615	-0.0824467	0.603122	0.825373
NCU00682	0	1253.96	-1.49237	7.53437e-17	3.04649e-15		1253.96	-0.636866	0.000284082	0.00150902		1253.96	-0.504466	0.00405297	0.0143988		1253.96	-0.0824697	0.63629	0.790839		1253.96	-0.36648	0.0341545	0.0964509		1253.96	0.576148	0.000864662	0.017082
NCU00684	0	1226.15	-4.43936	1.81091e-09	2.13193e-08	down	1226.15	-3.51768	1.73112e-06	1.84132e-05	down	1226.15	-2.79556	0.000141623	0.000882177	down	1226.15	-3.31312	6.61797e-06	0.000113622	down	1226.15	-3.2191	1.15096e-05	0.000127528	down	1226.15	-2.80551	0.000132895	0.00435583	down
NCU00685	0	5169.63	-0.811253	2.2194e-16	8.54158e-15		5169.63	-0.861912	2.68801e-18	2.37593e-16		5169.63	-0.804123	4.28903e-16	2.8082e-14		5169.63	-0.710849	6.04946e-13	6.46246e-11		5169.63	-0.835173	1.4655e-17	1.56067e-15		5169.63	-0.465023	2.19951e-06	0.000165499
NCU00687	0	2560.79	-1.11361	1.99159e-09	2.32183e-08		2560.79	-1.21633	5.755e-11	1.63564e-09		2560.79	-1.13798	9.10075e-10	2.17999e-08		2560.79	-0.697069	0.000166737	0.00165836		2560.79	-0.903992	9.41531e-07	1.48611e-05		2560.79	-0.191341	0.299593	0.603299
NCU00688	0	22.4667	-0.372137	0.341398	0.454517		22.4667	-1.04185	0.0158335	0.0424742		22.4667	-0.285301	0.465607	0.586672		22.4667	-0.428547	0.279457	0.48327		22.4667	-0.16398	0.624899	0.758634		22.4667	-0.0394301	0.912834	0.96751
NCU00689	0	201.402	-0.568749	0.0434835	0.0814509		201.402	-0.0357461	0.897162	0.930207		201.402	-0.972427	0.00072264	0.00348278		201.402	-0.274039	0.326281	0.533909		201.402	-0.564893	0.0386501	0.106023		201.402	0.113712	0.678379	0.863837
NCU00690	0	160.665	0.456015	0.0409776	0.077438		160.665	0.223186	0.321224	0.444127		160.665	0.199468	0.380065	0.507232		160.665	0.00703332	0.975515	0.990029		160.665	0.238051	0.268966	0.436218		160.665	0.239501	0.281137	0.584552
NCU00691	0	390.828	-3.23268	5.01875e-26	5.40389e-24	down	390.828	-2.45007	5.6371e-17	4.18709e-15	down	390.828	-2.93307	2.82402e-22	4.02606e-20	down	390.828	-0.785594	0.00514222	0.0265171		390.828	-1.70591	1.05533e-09	3.42945e-08		390.828	0.306995	0.267533	0.569077
NCU00692	0	1168.31	1.36369	0.00709071	0.0170558		1168.31	0.618236	0.222513	0.336837		1168.31	0.808121	0.110798	0.198529		1168.31	-0.311039	0.540133	0.722152		1168.31	-0.00580576	0.990855	0.995926		1168.31	-1.45111	0.00436641	0.0485637
NCU00693	0	114.865	0.94823	0.00895707	0.0209049		114.865	0.273054	0.458033	0.580824		114.865	0.391978	0.287195	0.413036		114.865	-0.0372416	0.92042	0.964212		114.865	0.303574	0.398632	0.567921		114.865	-0.439002	0.24016	0.535942
NCU00694	0	1435.76	-2.69236	1.7827e-05	9.06773e-05	down	1435.76	-2.5005	6.69645e-05	0.000443703	down	1435.76	-2.46045	8.77693e-05	0.000581554	down	1435.76	-2.11675	0.000733957	0.00552735	down	1435.76	-2.40741	0.000120974	0.000938936	down	1435.76	-1.69096	0.00693935	0.0662031
NCU00695	0	246.026	-21.4461	2.20203e-05	0.000109735	down	246.026	-1.66734	0.730766	0.809835		246.026	-2.98156	0.538507	0.652215		246.026	-2.45872	0.611925	0.777163		246.026	-40.4353	1.2453e-15	1.06866e-13	down	246.026	1.52094	0.753549	0.897764
NCU00696	0	1713.05	-1.2504	0.0122715	0.0273802		1713.05	-0.796983	0.110217	0.197848		1713.05	-1.31293	0.00856752	0.0264784		1713.05	-1.20571	0.0157442	0.0627809		1713.05	-1.14878	0.0212379	0.0654539		1713.05	-1.31032	0.00866156	0.076478
NCU00697	0	14.1107	-1.53407	0.0106919	0.02429		14.1107	-2.8689	6.31157e-05	0.000421873	down	14.1107	-3.693	2.5459e-05	0.000199674	down	14.1107	-3.1705	4.17622e-05	0.000544229	down	14.1107	-2.62913	9.92483e-06	0.000112469	down	14.1107	-1.76563	0.0030794	0.0393091
NCU00698	0	16.7381	2.47803	2.9737e-05	0.000143779	up	16.7381	-0.169364	0.810269	0.869381		16.7381	1.86946	0.00212466	0.00854409		16.7381	0.596601	0.36461	0.570622		16.7381	0.110977	0.858789	0.91839		16.7381	0.660747	0.300101	0.603901
NCU00699	0	85.9382	-0.345127	0.300001	0.409297		85.9382	0.371586	0.245073	0.36255		85.9382	0.0336445	0.918101	0.947723		85.9382	0.0541219	0.868089	0.933927		85.9382	0.311983	0.313766	0.484095		85.9382	-0.188532	0.561124	0.801309
NCU00700	0	118.792	-1.19689	0.0288587	0.0572692		118.792	-1.02892	0.0590265	0.120604		118.792	-1.29877	0.0182318	0.0485249		118.792	-0.496429	0.35881	0.564154		118.792	-0.433121	0.417561	0.585288		118.792	0.263754	0.62198	0.835973
NCU00701	0	449.882	-2.84459	0.000596105	0.0019705	down	449.882	-3.31027	6.66803e-05	0.000442483	down	449.882	-4.34497	2.1901e-07	3.02473e-06	down	449.882	-2.04922	0.0131555	0.0543623		449.882	-3.74939	5.88902e-06	7.18965e-05	down	449.882	-1.17073	0.155773	0.430227
NCU00704	0	1.09963	2.99305	0.137769	0.215016		1.09963	-0.0526203	0.982577	1		1.09963	-1.31451	0.587711	1		1.09963	-1.3696	0.572157	1		1.09963	1.10668	0.590694	1		1.09963	-0.278978	0.907972	1
NCU00705	0	16.2701	-2.69012	0.00386441	0.0100577	down	16.2701	-2.1135	0.0124207	0.0346123	down	16.2701	-1.75105	0.0335393	0.0786559		16.2701	0.839831	0.226703	0.422062		16.2701	-0.613813	0.38017	0.551124		16.2701	0.262268	0.707787	0.880691
NCU00706	0	12661.5	0.707202	0.00170101	0.00489953		12661.5	0.185868	0.409644	0.534442		12661.5	0.363729	0.106626	0.19309		12661.5	-0.224624	0.319234	0.52656		12661.5	0.0305048	0.892307	0.937959		12661.5	-0.0877877	0.696966	0.874796
NCU00707	0	304.591	1.96201	0.000923913	0.00288305		304.591	0.805418	0.174996	0.281337		304.591	0.476263	0.423443	0.547515		304.591	-0.0311617	0.958336	0.982031		304.591	-0.115431	0.845776	0.910685		304.591	-0.876063	0.143508	0.414616
NCU00708	0	1.11432	-0.750327	0.724373	0.808958		1.11432	-1.84771	0.430618	1		1.11432	-3.10922	0.187642	1		1.11432	-0.70361	0.740546	1		1.11432	-1.46214	0.477323	1		1.11432	-2.02137	0.387779	1
NCU00709	0	18.1209	1.38481	0.0172446	0.0368462		18.1209	-0.841462	0.200558	0.311992		18.1209	-0.424539	0.508354	0.625464		18.1209	-1.84695	0.0145693	0.0589102		18.1209	-0.931739	0.125717	0.25434		18.1209	-0.124419	0.838725	0.936531
NCU00710	0	35.9435	0.521938	0.119342	0.190927		35.9435	0.546083	0.100441	0.184152		35.9435	-0.420175	0.264483	0.388333		35.9435	0.112274	0.748282	0.864817		35.9435	0.164754	0.602002	0.740431		35.9435	-0.195602	0.575087	0.81046
NCU00711	0	103.463	-0.516621	0.102019	0.16801		103.463	-0.436414	0.164286	0.268813		103.463	-0.757455	0.0184622	0.0490789		103.463	-0.827185	0.0101399	0.0445985		103.463	-0.73983	0.0152766	0.0505729		103.463	-0.39617	0.20169	0.49092
NCU00712	0	3137.45	0.0100462	0.975207	0.989665		3137.45	0.753973	0.0195604	0.0500708		3137.45	0.175551	0.587028	0.693589		3137.45	0.0321798	0.920701	0.964282		3137.45	0.0699859	0.828378	0.901165		3137.45	-0.74686	0.0209646	0.135177
NCU00713	0	284.992	-1.30982	0.000924905	0.00288427		284.992	-0.646225	0.0986946	0.181818		284.992	-1.32974	0.000789835	0.00374536		284.992	-0.648519	0.0978738	0.237427		284.992	-0.72975	0.0601121	0.148416		284.992	-0.356147	0.360483	0.662883
NCU00714	0	1275.82	0.249667	0.578096	0.687844		1275.82	0.117181	0.794086	0.857089		1275.82	-0.210573	0.639364	0.738158		1275.82	-0.343626	0.44455	0.640688		1275.82	-0.0295727	0.947419	0.970139		1275.82	0.456423	0.308944	0.613
NCU00715	0	297.619	0.176112	0.692127	0.783446		297.619	0.65705	0.138054	0.235208		297.619	0.270971	0.542322	0.655638		297.619	0.175511	0.693195	0.833086		297.619	0.591148	0.18017	0.327755		297.619	0.142137	0.74878	0.895516
NCU00716	0	6035.98	-8.13224	9.48764e-09	9.70332e-08	down	6035.98	-9.4391	3.46429e-11	1.0207e-09	down	6035.98	-8.64976	1.11478e-09	2.62762e-08	down	6035.98	-7.34903	2.04218e-07	5.96994e-06	down	6035.98	-7.70486	4.95413e-08	1.12281e-06	down	6035.98	-4.15656	0.00322927	0.0403799	down
NCU00717	0	511.587	-1.93635	2.56293e-13	6.20866e-12		511.587	-2.85382	7.72671e-26	1.58829e-23	down	511.587	-2.41889	2.28821e-19	2.3518e-17	down	511.587	-1.94429	2.14339e-13	2.61222e-11		511.587	-2.4138	2.52165e-20	4.95307e-18	down	511.587	-0.805063	0.00189624	0.0288705
NCU00718	0	3.56666	-1.23728	0.291716	0.400848		3.56666	-3.34064	0.0483384	0.103104		3.56666	-3.17909	0.0619386	0.126789		3.56666	-0.902433	0.424916	0.623927		3.56666	-2.48507	0.0354808	0.0994656		3.56666	0.363635	0.716268	0.883894
NCU00719	0	240.725	-1.45844	0.00128551	0.00383294		240.725	-1.34001	0.00299381	0.0107483		240.725	-0.58598	0.190275	0.300801		240.725	0.493207	0.265683	0.46822		240.725	-0.678114	0.125833	0.254484		240.725	-0.333407	0.453297	0.734707
NCU00720	0	953.173	-0.462857	0.0986809	0.163439		953.173	0.549654	0.0481459	0.102793		953.173	0.917298	0.000963378	0.00442353		953.173	0.450126	0.105956	0.250777		953.173	0.235835	0.395103	0.564551		953.173	-0.589509	0.0351499	0.185685
NCU00721	0	292.016	0.414746	0.453318	0.569649		292.016	0.857379	0.120244	0.211131		292.016	1.0325	0.061307	0.125752		292.016	0.227953	0.680594	0.823431		292.016	0.373709	0.497422	0.6533		292.016	0.136893	0.804486	0.925073
NCU00722	0	155.251	-0.102473	0.844186	0.901672		155.251	0.511475	0.32335	0.446646		155.251	-0.347022	0.507594	0.625012		155.251	-0.261092	0.617391	0.780465		155.251	0.0548155	0.915358	0.950858		155.251	0.267667	0.605296	0.826907
NCU00723	0	125.794	-1.61558	0.00191824	0.00544666		125.794	-0.828439	0.100929	0.18478		125.794	-0.874381	0.0851623	0.162352		125.794	1.02403	0.0370004	0.117772		125.794	0.655883	0.179196	0.326782		125.794	0.758188	0.122319	0.378616
NCU00724	0	41.2098	0.512472	0.416611	0.533108		41.2098	1.95923	0.000655632	0.00306459		41.2098	4.5021	2.34184e-16	1.60282e-14	up	41.2098	1.53982	0.008871	0.0403373		41.2098	1.09192	0.0553379	0.13932		41.2098	-0.0139669	0.98271	0.994665
NCU00725	0	833.727	-0.406048	0.00589112	0.0145239		833.727	-0.160989	0.270466	0.390183		833.727	-0.188503	0.199223	0.311669		833.727	0.0260323	0.858238	0.927909		833.727	0.0129031	0.927953	0.958585		833.727	0.0904957	0.531037	0.786133
NCU00726	0	18517.1	0.839607	6.98502e-05	0.000307476		18517.1	0.721713	0.000630132	0.0029737		18517.1	0.998215	2.26503e-06	2.40055e-05		18517.1	0.934911	9.49571e-06	0.00015301		18517.1	1.03783	8.74912e-07	1.39843e-05		18517.1	0.314711	0.136107	0.402644
NCU00727	0	77.5554	1.81972	1.88403e-05	9.5376e-05		77.5554	0.671224	0.122835	0.214427		77.5554	1.07776	0.0126172	0.0360568		77.5554	-0.714481	0.125548	0.282246		77.5554	-0.212514	0.622962	0.757066		77.5554	0.40598	0.351119	0.653946
NCU00728	0	41.9753	1.25135	0.00247408	0.00680905		41.9753	0.660704	0.118259	0.208432		41.9753	0.688841	0.105657	0.191531		41.9753	0.0356428	0.93581	0.970582		41.9753	0.228798	0.577775	0.721626		41.9753	-0.0743934	0.864386	0.946336
NCU00729	0	2130.3	0.0857575	0.786574	0.857577		2130.3	-0.428818	0.176202	0.282807		2130.3	-0.174458	0.582042	0.689216		2130.3	-0.251832	0.42692	0.625561		2130.3	-0.0203674	0.948651	0.971062		2130.3	-0.121461	0.701307	0.877699
NCU00730	0	57.5139	-0.0993428	0.899431	0.937894		57.5139	-0.847849	0.284292	0.404517		57.5139	-1.62414	0.0437771	0.0962551		57.5139	-1.7169	0.0332186	0.108591		57.5139	-1.98244	0.0123083	0.0426807		57.5139	-1.22251	0.123353	0.38107
NCU00732	0	723.394	-4.29422	0.0106484	0.0242155	down	723.394	-4.63922	0.00581535	0.0186577	down	723.394	-5.34445	0.00151899	0.00647366	down	723.394	-5.26882	0.00176386	0.0112225	down	723.394	-5.78511	0.000583628	0.00352484	down	723.394	-1.68921	0.314216	0.619732
NCU00733	0	18.031	-0.0314764	0.959615	0.978922		18.031	-0.0917837	0.882524	0.920537		18.031	0.119182	0.847104	0.898866		18.031	1.29338	0.024157	0.0861271		18.031	0.450204	0.426151	0.592995		18.031	0.392447	0.505974	0.769048
NCU00734	0	477.966	-0.472733	0.000491471	0.00167846		477.966	-0.224484	0.0911281	0.170979		477.966	-0.0582599	0.660799	0.755993		477.966	0.061169	0.641745	0.794565		477.966	-0.0206119	0.86991	0.924953		477.966	0.128183	0.320457	0.626236
NCU00735	0	55.4998	2.09098	3.12902e-05	0.000150529	up	55.4998	1.36524	0.00717903	0.0222495		55.4998	1.0185	0.0475828	0.102807		55.4998	-0.198887	0.71261	0.845365		55.4998	0.19115	0.706917	0.82157		55.4998	-0.143719	0.785915	0.916185
NCU00736	0	22.4668	-0.154073	0.715219	0.802187		22.4668	0.333262	0.391985	0.516768		22.4668	0.333795	0.401023	0.527791		22.4668	-0.0634117	0.879476	0.940099		22.4668	0.209278	0.551137	0.699325		22.4668	1.31376	0.000143033	0.00455025
NCU00737	0	620.75	0.610485	0.000292745	0.00106709		620.75	0.532712	0.00158017	0.00630856		620.75	0.380803	0.0249758	0.062362		620.75	0.293195	0.084609	0.214761		620.75	0.487788	0.00324828	0.0146332		620.75	0.293536	0.0817159	0.304254
NCU00738	0	201.302	0.361982	0.0261427	0.0528088		201.302	0.156038	0.342973	0.46783		201.302	0.220859	0.182812	0.291372		201.302	0.148665	0.37058	0.575921		201.302	0.180483	0.239266	0.401991		201.302	0.289141	0.0708511	0.280066
NCU00739	0	0.433114	1.88108	0.714399	0.801649		0.433114	0.210815	0.968071	1		0.433114	-1.03875	0.843823	1		0.433114	-1.09384	0.835655	1		0.433114	-2.31712	0.660331	1		0.433114	-1.4267	0.786712	1
NCU00740	0	51.7899	-0.50389	0.29772	0.40694		51.7899	-0.074431	0.875448	0.91516		51.7899	-2.30567	3.89415e-05	0.000287796	down	51.7899	-0.150317	0.75299	0.867094		51.7899	-0.523178	0.262101	0.428227		51.7899	-0.0374462	0.936638	0.976944
NCU00741	0	827.532	-0.248486	0.168605	0.254649		827.532	-0.508609	0.00498886	0.0163928		827.532	-0.658254	0.000306324	0.00167549		827.532	-0.3103	0.0860914	0.21706		827.532	-0.500514	0.00499831	0.0208593		827.532	0.116971	0.512973	0.774247
NCU00742	0	511.182	3.01577	1.77815e-07	1.42714e-06	up	511.182	2.67447	3.69302e-06	3.54811e-05	up	511.182	3.12242	6.44559e-08	1.01555e-06	up	511.182	2.17066	0.000176376	0.00173825	up	511.182	3.05887	1.13937e-07	2.34206e-06	up	511.182	-0.977974	0.0994923	0.337346
NCU00743	0	4960.1	-1.61432	2.64006e-05	0.000128752		4960.1	-0.00847023	0.982376	0.989993		4960.1	0.0847737	0.825033	0.882972		4960.1	0.29489	0.441812	0.638284		4960.1	0.237162	0.536039	0.685911		4960.1	-0.76562	0.0459377	0.216976
NCU00744	0	943.233	-1.17536	9.52084e-05	0.000401931		943.233	-1.58703	1.48049e-07	2.09712e-06		943.233	-1.42623	2.32461e-06	2.46075e-05		943.233	-1.37697	5.02145e-06	9.01465e-05		943.233	-1.48994	6.69687e-07	1.10849e-05		943.233	-0.633576	0.0345887	0.184061
NCU00745	0	4.84184	-0.862203	0.47755	0.593408		4.84184	-2.73401	0.0662312	0.132596		4.84184	-3.56791	0.0460707	0.100325		4.84184	-0.82838	0.494839	0.686303		4.84184	-1.53087	0.192978	0.343759		4.84184	0.0896383	0.937338	0.977219
NCU00746	0	0.914792	3.14468	0.207323	0.30274		0.914792	-1.35218	0.633398	1		0.914792	-1.19713	0.672834	1		0.914792	-1.25222	0.658711	1		0.914792	-0.029344	0.991149	1		0.914792	-0.0981088	0.972225	1
NCU00747	0	1.11184	4.4993	0.104627	0.171627		1.11184	2.21289	0.465809	1		1.11184	3.24785	0.260747	1		1.11184	4.2242	0.130093	1		1.11184	3.02939	0.277401	1		1.11184	0	1	1
NCU00748	0	633.111	-2.67351	7.20039e-09	7.47576e-08	down	633.111	-1.53337	0.00067043	0.00312404		633.111	0.134894	0.761848	0.835689		633.111	1.82926	3.63125e-05	0.000479713		633.111	0.815913	0.0653981	0.157809		633.111	0.758473	0.0872721	0.31439
NCU00749	0	382.179	-0.850216	0.00888543	0.020763		382.179	-0.655013	0.0427742	0.0936075		382.179	-0.211785	0.510473	0.627286		382.179	-0.00796673	0.980181	0.991286		382.179	-0.267387	0.40036	0.569211		382.179	1.06622	0.000774607	0.0156971
NCU00751	0	94.4227	-0.036436	0.92131	0.951904		94.4227	-0.565227	0.132348	0.227371		94.4227	-0.608818	0.108314	0.195305		94.4227	0.0718507	0.845144	0.9204		94.4227	-0.260022	0.469997	0.630687		94.4227	0.11771	0.746341	0.895369
NCU00752	0	33.4309	-1.40529	0.000177639	0.000690315		33.4309	-1.71826	1.23211e-05	0.000101755		33.4309	-0.796616	0.0199288	0.0521927		33.4309	0.0948219	0.753813	0.867848		33.4309	-0.421403	0.137956	0.270736		33.4309	-0.550457	0.078875	0.297907
NCU00753	0	350.494	0.268797	0.182162	0.271951		350.494	-0.340475	0.0971005	0.179592		350.494	0.212964	0.292524	0.418318		350.494	0.0655709	0.746586	0.86414		350.494	-0.0965449	0.625535	0.75895		350.494	0.254052	0.203925	0.493246
NCU00754	0	656.678	-3.21595	1.21948e-10	1.80066e-09	down	656.678	-3.04561	9.7389e-10	2.16287e-08	down	656.678	-1.81417	0.000239475	0.00136739		656.678	-1.58321	0.00132656	0.00887758		656.678	-1.93993	7.98451e-05	0.000665802		656.678	-0.223338	0.649205	0.85106
NCU00755	0	54.8523	-2.27324	3.18227e-06	1.94364e-05	down	54.8523	-1.89237	5.70788e-05	0.000387199		54.8523	-2.19859	6.74347e-06	6.26108e-05	down	54.8523	-0.757437	0.0881015	0.22033		54.8523	-1.70773	0.000103036	0.000818395		54.8523	-0.546193	0.210354	0.501886
NCU00756	0	0.287385	-1.29936	0.805135	0.872214		0.287385	-1.36998	0.794792	1		0.287385	-1.21495	0.817579	1		0.287385	0.193848	0.970625	1		0.287385	-2.49331	0.635957	1		0.287385	-0.188843	0.971376	1
NCU00757	0	10.2821	-4.41878	0.000196515	0.000754789	down	10.2821	-3.15841	0.000352666	0.00181617	down	10.2821	-2.76696	0.00110268	0.00495052	down	10.2821	-2.81029	0.000898687	0.00646035	down	10.2821	-2.46985	0.000394798	0.00254717	down	10.2821	-1.6659	0.0176639	0.12193
NCU00758	0	56.5482	-0.0754824	0.8294	0.890548		56.5482	-0.947866	0.0104688	0.0302397		56.5482	-0.645532	0.0776033	0.151287		56.5482	-0.757674	0.0392077	0.122877		56.5482	-0.588122	0.083504	0.189497		56.5482	-0.421584	0.229915	0.522852
NCU00759	0	1257.22	-3.68692	9.4169e-06	5.13908e-05	down	1257.22	-3.2781	8.05486e-05	0.000519186	down	1257.22	-2.90056	0.000483119	0.00248492	down	1257.22	-2.57081	0.00196977	0.0123293	down	1257.22	-2.77337	0.000833702	0.00474201	down	1257.22	-2.77908	0.000820119	0.0164652	down
NCU00761	0	1066.94	-4.56031	5.36965e-15	1.72676e-13	down	1066.94	-3.37176	4.18324e-09	8.12653e-08	down	1066.94	-2.48283	1.3702e-05	0.000116575	down	1066.94	0.790354	0.163463	0.338222		1066.94	-0.968049	0.0879619	0.196486		1066.94	-0.92455	0.103485	0.346154
NCU00762	0	23.9935	1.61006	0.00485004	0.0122472		23.9935	1.6498	0.00380081	0.0130467		23.9935	-4.70449	0.00208336	0.00839405	down	23.9935	-0.172664	0.781843	0.884352		23.9935	-1.69087	0.00816309	0.0310338		23.9935	0.283077	0.633408	0.842431
NCU00763	0	4.19476	1.7996	0.11061	0.179776		4.19476	-0.218798	0.861116	0.907613		4.19476	-0.467187	0.719359	0.801562		4.19476	-0.537775	0.679659	0.822875		4.19476	-1.74485	0.179607	0.32706		4.19476	-0.520607	0.679039	0.864204
NCU00764	0	0.154167	3.14563	0.545728	0.656917		0.154167	0	1	1		0.154167	0	1	1		0.154167	0	1	1		0.154167	0	1	1		0.154167	0	1	1
NCU00765	0	18.2979	-0.364027	0.60066	0.708447		18.2979	-0.436136	0.530655	0.645713		18.2979	-1.79454	0.026109	0.0644449		18.2979	0.373588	0.577027	0.751281		18.2979	-0.0570979	0.930248	0.959847		18.2979	0.610344	0.352404	0.65507
NCU00766	0	260.861	-1.42968	2.49837e-05	0.00012259		260.861	-0.84842	0.0108754	0.0311707		260.861	-0.280262	0.396361	0.523196		260.861	-0.0901917	0.784085	0.88512		260.861	-0.102146	0.753483	0.851776		260.861	-0.327493	0.319147	0.62512
NCU00768	0	1525.06	1.44833	5.51889e-06	3.18792e-05		1525.06	0.760002	0.0172487	0.0454781		1525.06	1.15703	0.000286192	0.00158301		1525.06	0.294537	0.356907	0.56276		1525.06	0.433407	0.17378	0.318942		1525.06	-0.312533	0.328845	0.635724
NCU00770	0	390.03	-0.371871	0.02707	0.0542703		390.03	0.0187937	0.908942	0.938094		390.03	-0.172651	0.301616	0.42837		390.03	0.347963	0.032504	0.106779		390.03	0.261537	0.0972826	0.210703		390.03	0.436227	0.00654742	0.0640053
NCU00771	0	539.663	-0.25716	0.182479	0.272298		539.663	-0.253721	0.187668	0.296372		539.663	-0.454867	0.0192436	0.0507137		539.663	-0.356888	0.0651396	0.177915		539.663	-0.222765	0.238684	0.401241		539.663	-0.361169	0.0600131	0.252697
NCU00772	0	245.6	-0.50386	0.0201255	0.0420089		245.6	-0.403192	0.0608744	0.123694		245.6	-0.295893	0.169818	0.275619		245.6	-0.249008	0.245832	0.444985		245.6	-0.286588	0.166241	0.309967		245.6	-0.204601	0.333359	0.638788
NCU00773	0	87.3499	-0.0395546	0.952448	0.973372		87.3499	-2.13036	0.00196224	0.00753444	down	87.3499	-1.85347	0.00684998	0.0220171		87.3499	-0.518016	0.437211	0.634243		87.3499	-0.722842	0.274042	0.442098		87.3499	-0.470796	0.478353	0.750217
NCU00774	0	1146.55	-0.530865	0.16267	0.247007		1146.55	-0.380022	0.317203	0.439543		1146.55	-0.493903	0.194047	0.305355		1146.55	-0.0870154	0.818739	0.905276		1146.55	0.375812	0.320893	0.490977		1146.55	0.209425	0.580696	0.813332
NCU00775	0	3365.55	0.717847	0.0368888	0.0707576		3365.55	0.597624	0.0823189	0.157629		3365.55	0.459997	0.181255	0.289504		3365.55	0.11961	0.728212	0.853476		3365.55	0.344041	0.316939	0.487554		3365.55	-0.39892	0.246587	0.544593
NCU00776	0	2.0884	0.975239	0.697284	0.787702		2.0884	-1.12321	0.674011	0.764282		2.0884	-0.922389	0.729094	0.809707		2.0884	-3.36593	0.236749	1		2.0884	-0.94674	0.709671	0.823632		2.0884	0.302008	0.904723	1
NCU00777	0	103.844	1.72841	9.48839e-05	0.000401002		103.844	0.771016	0.0853747	0.16246		103.844	1.0679	0.0169098	0.0457361		103.844	-0.578024	0.216541	0.410186		103.844	-0.0792149	0.859084	0.918414		103.844	-0.639	0.167131	0.446004
NCU00778	0	209.363	0.151752	0.574885	0.684618		209.363	-0.0508448	0.8515	0.900589		209.363	-0.16452	0.548111	0.660498		209.363	-0.128163	0.638827	0.792739		209.363	-0.110526	0.677192	0.799266		209.363	0.0936487	0.727651	0.888438
NCU00780	0	43.5911	-2.22358	0.00541967	0.0135181	down	43.5911	-1.43531	0.0646607	0.130042		43.5911	-2.04889	0.0101028	0.0301648	down	43.5911	-1.09612	0.155875	0.328043		43.5911	-1.54706	0.0424328	0.11414		43.5911	-0.342628	0.651915	0.852567
NCU00781	0	1.1954	-0.0719729	0.972725	0.987878		1.1954	-3.58649	0.142886	1		1.1954	-3.43145	0.160977	1		1.1954	-2.03388	0.405022	1		1.1954	-1.71437	0.425208	1		1.1954	-3.8194	0.118694	1
NCU00782	0	38.632	-0.7117	0.421457	0.537865		38.632	-0.974899	0.272607	0.392695		38.632	-1.25985	0.160541	0.26371		38.632	-1.47252	0.1025	0.245347		38.632	-1.0353	0.236693	0.398881		38.632	0.343951	0.693007	0.872485
NCU00783	0	1.82045	-1.23358	0.579119	0.688719		1.82045	-3.80191	0.121416	0.212683		1.82045	-2.21903	0.364443	0.492358		1.82045	-3.70196	0.131519	1		1.82045	-1.59434	0.452698	0.61696		1.82045	0.714726	0.725853	1
NCU00784	0	315.011	-0.619151	0.00602227	0.0148097		315.011	0.022581	0.917718	0.944463		315.011	0.418996	0.0533518	0.112253		315.011	0.556349	0.00989789	0.0438762		315.011	0.682946	0.00118747	0.00637672		315.011	0.497575	0.0202285	0.132059
NCU00786	0	12.2868	0.585318	0.362505	0.476528		12.2868	-0.563915	0.419313	0.544431		12.2868	-1.72393	0.0389859	0.0880645		12.2868	0.505792	0.434229	0.631567		12.2868	-0.183701	0.770406	0.861868		12.2868	-0.775339	0.265776	0.566721
NCU00787	0	27.4678	-0.143039	0.826168	0.888073		27.4678	-0.64928	0.326809	0.450931		27.4678	-2.31356	0.00229273	0.00914306	down	27.4678	-0.427438	0.516409	0.70282		27.4678	-0.862625	0.17951	0.32706		27.4678	-0.159437	0.804979	0.925277
NCU00788	0	104.71	-2.93094	1.17235e-10	1.74174e-09	down	104.71	-2.06827	9.9107e-07	1.13468e-05	down	104.71	-1.91651	5.78746e-06	5.48289e-05		104.71	-0.488825	0.219653	0.413966		104.71	-1.02249	0.00925824	0.0340548		104.71	-0.000832172	0.998307	1
NCU00789	0	1280.84	-0.30659	0.0106346	0.0241897		1280.84	0.0339312	0.775082	0.842779		1280.84	0.113028	0.342013	0.47022		1280.84	-0.33929	0.00477611	0.0249944		1280.84	-0.277798	0.0176391	0.0564584		1280.84	-0.0124767	0.915986	0.969544
NCU00790	0	2175.46	-6.20416	6.10476e-34	1.21879e-31	down	2175.46	-4.11549	8.77895e-17	6.25784e-15	down	2175.46	-2.86108	6.0913e-09	1.22366e-07	down	2175.46	-1.97109	5.96004e-05	0.000727394		2175.46	-2.5037	3.33125e-07	5.9726e-06	down	2175.46	0.0276014	0.955086	0.984016
NCU00792	0	1756.56	0.885728	0.000132534	0.000532721		1756.56	0.538248	0.0203532	0.0518003		1756.56	0.853475	0.000232412	0.0013305		1756.56	0.361253	0.119974	0.273554		1756.56	0.61657	0.00765261	0.0295636		1756.56	-0.0330086	0.887062	0.957205
NCU00793	0	1975.04	-1.68748	0.000126055	0.000510345		1975.04	-1.53782	0.000473249	0.00234761		1975.04	-1.37319	0.00180032	0.00741177		1975.04	-1.23725	0.00490463	0.0255047		1975.04	-1.4283	0.00114875	0.00619133		1975.04	-1.62046	0.000229388	0.00668327
NCU00794	0	150.629	1.20375	0.00398307	0.0103155		150.629	0.283371	0.501949	0.619481		150.629	0.343757	0.415996	0.540972		150.629	-0.995319	0.0224429	0.0817335		150.629	-0.657124	0.118541	0.243564		150.629	-0.753624	0.078704	0.297521
NCU00795	0	20.5262	-2.41282	0.0004166	0.00145597	down	20.5262	-1.48999	0.0156958	0.0421945		20.5262	-1.9048	0.00339825	0.0124581		20.5262	-1.20218	0.0479662	0.142238		20.5262	-1.92862	0.00106296	0.00580329		20.5262	-0.998865	0.0893053	0.318912
NCU00796	0	433.625	-1.67288	0.00628142	0.0153676		433.625	-0.38249	0.529439	0.6445		433.625	-1.31423	0.0314941	0.0747319		433.625	-0.0316203	0.95851	0.982031		433.625	-0.578198	0.340838	0.510664		433.625	0.266274	0.660933	0.855989
NCU00797	0	5.95476	-1.45587	0.234401	0.334764		5.95476	-5.78532	0.00141231	0.00576599	down	5.95476	-2.63919	0.0564985	0.117753		5.95476	-0.35218	0.761267	0.872251		5.95476	-2.16194	0.0691085	0.164207		5.95476	-1.77668	0.147243	0.41984
NCU00798	0	278.674	1.25753	0.493216	0.608378		278.674	0.775559	0.672652	0.763102		278.674	0.855081	0.641346	0.74006		278.674	0.712544	0.697904	0.836085		278.674	1.88288	0.304749	0.474824		278.674	-5.23279	0.0058911	0.0596207
NCU00799	0	194.722	0.855724	0.000116107	0.000476513		194.722	0.923494	2.91392e-05	0.000214993		194.722	0.601576	0.00756129	0.0239292		194.722	0.471016	0.0371684	0.118199		194.722	0.676489	0.0017196	0.00871971		194.722	0.0891061	0.694142	0.873526
NCU00800	0	6.12356	0.60175	0.496802	0.611542		6.12356	0.541112	0.540706	0.654429		6.12356	0.722522	0.412608	0.538338		6.12356	1.96299	0.0131227	0.0543046		6.12356	1.29194	0.0935121	0.2051		6.12356	0.619614	0.468916	0.74447
NCU00801	0	888.216	-5.13372	3.14697e-10	4.32675e-09	down	888.216	-3.16205	8.384e-05	0.000535449	down	888.216	-4.44258	4.23082e-08	7.15127e-07	down	888.216	-3.06044	0.000140751	0.00143962	down	888.216	-3.59971	7.26484e-06	8.61931e-05	down	888.216	0.549034	0.492685	0.760055
NCU00802	0	90.6838	0.0346327	0.912462	0.945925		90.6838	0.384575	0.212456	0.325628		90.6838	0.446427	0.149478	0.24962		90.6838	0.0434289	0.890478	0.946714		90.6838	0.637224	0.03134	0.0901811		90.6838	-0.567142	0.0772117	0.294564
NCU00803	0	64.1507	0.462861	0.202364	0.296885		64.1507	-0.671134	0.082609	0.158116		64.1507	0.580716	0.109218	0.196464		64.1507	0.42816	0.239576	0.439168		64.1507	-0.296818	0.406081	0.574756		64.1507	-0.309336	0.405094	0.697287
NCU00804	0	0.0705971	-0.556772	0.916183	0.948251		0.0705971	-0.627327	0.905617	1		0.0705971	-0.472288	0.928871	1		0.0705971	-0.527377	0.9206	1		0.0705971	-1.75066	0.74073	1		0.0705971	-0.860234	0.870841	1
NCU00805	0	1102.92	0.272072	0.170269	0.256717		1102.92	-0.812968	5.03845e-05	0.000346845		1102.92	-0.331232	0.0971515	0.179349		1102.92	-0.743793	0.000209333	0.00197963		1102.92	-0.556964	0.00489439	0.0204934		1102.92	-0.493923	0.0131529	0.0991394
NCU00806	0	12.7419	9.43253	1.32271e-12	2.81053e-11	up	12.7419	3.71424	0.0178132	0.0464299	up	12.7419	3.91565	0.0121025	0.0347996	up	12.7419	0	1	1		12.7419	2.58967	0.0985567	0.212267		12.7419	1.90581	0.326597	0.63279
NCU00808	0	43.1269	-0.310336	0.627118	0.731303		43.1269	-0.336516	0.597935	0.702065		43.1269	-1.10459	0.0942684	0.175419		43.1269	-0.426031	0.506637	0.695531		43.1269	-0.47816	0.444663	0.609698		43.1269	0.352237	0.57372	0.809537
NCU00809	0	121.437	-0.478397	0.392603	0.509247		121.437	-0.151041	0.785994	0.851606		121.437	-0.244533	0.66135	0.756385		121.437	-0.121926	0.826662	0.910064		121.437	0.143823	0.793582	0.877425		121.437	0.541562	0.325903	0.63187
NCU00810	0	628.816	-1.87352	0.000604856	0.00199667		628.816	-1.11169	0.0409683	0.0902813		628.816	-1.15514	0.0338375	0.0791871		628.816	-0.826835	0.128208	0.286005		628.816	-0.631504	0.243831	0.406646		628.816	0.714336	0.187166	0.474745
NCU00811	0	10002.4	0.160623	0.683835	0.777181		10002.4	-0.203259	0.606349	0.708649		10002.4	-0.118316	0.764221	0.837648		10002.4	-0.419346	0.287782	0.49213		10002.4	-0.4143	0.293483	0.463314		10002.4	-1.26902	0.00129928	0.0224853
NCU00812	0	484.524	-0.800253	0.0496901	0.0911874		484.524	-0.991019	0.0151614	0.0409636		484.524	-0.583922	0.151798	0.252682		484.524	-1.33053	0.00115726	0.00792655		484.524	-1.03727	0.0106143	0.0379069		484.524	-1.6129	8.13179e-05	0.00314127
NCU00813	0	812.375	-3.10855	2.29838e-11	3.83051e-10	down	812.375	-1.54305	0.000765426	0.00347632		812.375	-1.23708	0.00694227	0.0222571		812.375	-0.592652	0.194867	0.382789		812.375	-1.14594	0.0120741	0.0420171		812.375	-0.231611	0.611928	0.829875
NCU00814	0	547.901	-0.359976	0.034622	0.0670403		547.901	-0.181045	0.283827	0.404115		547.901	-0.0468267	0.781744	0.850313		547.901	0.297123	0.0753563	0.197533		547.901	0.0839376	0.608773	0.746006		547.901	0.0386268	0.816853	0.928686
NCU00817	0	0.315687	-1.46623	0.780505	0.853334		0.315687	-1.53685	0.770242	1		0.315687	0.0399866	0.993933	1		0.315687	-1.4369	0.784804	1		0.315687	-2.66018	0.613185	1		0.315687	-0.249855	0.962048	1
NCU00818	0	23.9186	3.23445	1.01957e-14	3.13159e-13	up	23.9186	0.333777	0.523203	0.638226		23.9186	1.69538	0.000204008	0.00119975		23.9186	0.77979	0.118079	0.270813		23.9186	1.20535	0.00537267	0.0221085		23.9186	0.617524	0.206408	0.495987
NCU00819	0	3.06339	2.56804	0.0105327	0.0239864	up	3.06339	-1.53032	0.366964	0.492274		3.06339	-1.36938	0.422539	0.546586		3.06339	0.895331	0.431926	0.629308		3.06339	0.811558	0.432624	0.59843		3.06339	0.834008	0.45134	0.734707
NCU00821	0	443	2.65953	1.64237e-10	2.38829e-09	up	443	1.91178	4.59032e-06	4.29353e-05		443	2.57571	6.13887e-10	1.51858e-08	up	443	1.25832	0.00267849	0.0157666		443	1.45116	0.000487886	0.00302626		443	0.378282	0.369249	0.671807
NCU00822	0	11.7028	8.339	2.49586e-11	4.12377e-10	up	11.7028	2.3924	0.138381	0.235719		11.7028	6.1536	1.44467e-06	1.62254e-05	up	11.7028	0.0836678	0.964947	0.985562		11.7028	0.310777	0.868464	0.924341		11.7028	1.19941	0.524497	0.782492
NCU00823	0	982.081	0.911479	0.00476862	0.0120957		982.081	0.680854	0.0351307	0.0798869		982.081	0.794721	0.0139392	0.0391018		982.081	0.719252	0.026071	0.0905268		982.081	0.969329	0.00260841	0.0122831		982.081	0.0171574	0.957743	0.985065
NCU00824	0	105.205	1.95145	9.17102e-09	9.38951e-08		105.205	0.916563	0.00849808	0.0255666		105.205	1.10856	0.00143651	0.00618474		105.205	0.515853	0.146645	0.314478		105.205	0.873214	0.00999281	0.0361845		105.205	0.810257	0.0194715	0.129208
NCU00825	0	38.8481	-0.864137	0.174618	0.262324		38.8481	-0.942967	0.138748	0.236162		38.8481	1.46694	0.0133614	0.0377683		38.8481	-0.183138	0.766544	0.875097		38.8481	0.12803	0.829206	0.901741		38.8481	-0.451735	0.462885	0.740332
NCU00826	0	24.4015	-1.04766	0.0897879	0.15061		24.4015	-2.53703	0.000593058	0.00282133	down	24.4015	-1.04549	0.0928868	0.173615		24.4015	0.198452	0.72789	0.853331		24.4015	0.220551	0.687655	0.80666		24.4015	0.5298	0.341143	0.645873
NCU00827	0	356.057	2.64718	2.85204e-48	1.60771e-45	up	356.057	1.54638	7.47105e-17	5.41284e-15		356.057	1.19954	2.05209e-10	5.49338e-09		356.057	0.556135	0.00417663	0.0224951		356.057	0.871782	1.97446e-06	2.76581e-05		356.057	1.11207	2.53063e-09	4.37825e-07
NCU00828	0	199.428	-0.751162	0.0137149	0.0300763		199.428	-1.06446	0.000548364	0.00264863		199.428	0.291853	0.324345	0.451092		199.428	-0.223113	0.456434	0.650877		199.428	-0.134928	0.643984	0.773762		199.428	0.520135	0.0757456	0.290707
NCU00829	0	308.578	1.3782	0.01795	0.0381152		308.578	1.08576	0.0625355	0.126633		308.578	1.32046	0.0234505	0.0593074		308.578	2.19615	0.000156012	0.0015734	up	308.578	2.32033	6.22785e-05	0.000539158	up	308.578	0.522299	0.371182	0.673175
NCU00830	0	215.171	1.13302	0.0180883	0.0383327		215.171	0.766083	0.111194	0.199198		215.171	0.582517	0.22801	0.345751		215.171	2.16384	5.41148e-06	9.63489e-05	up	215.171	2.15827	5.21701e-06	6.45843e-05	up	215.171	1.36146	0.00432547	0.0482946
NCU00831	0	1118.27	1.1363	1.40789e-07	1.15512e-06		1118.27	0.542468	0.0123105	0.0344098		1118.27	0.638613	0.00322676	0.0119837		1118.27	0.881772	4.56121e-05	0.000586451		1118.27	0.781606	0.000277365	0.00190196		1118.27	0.607771	0.00493369	0.0530985
NCU00832	0	253.97	-1.63978	0.00391722	0.0101676		253.97	-1.1111	0.0495937	0.105299		253.97	-2.16792	0.000152121	0.000934394	down	253.97	-1.3334	0.0187132	0.0711904		253.97	-1.71606	0.00236136	0.0112978		253.97	-1.38065	0.0147174	0.107378
NCU00833	0	458.487	-0.672583	1.37788e-07	1.13438e-06		458.487	-0.251442	0.0411653	0.0906086		458.487	-0.460717	0.000266192	0.00149294		458.487	-0.260135	0.0359335	0.115288		458.487	-0.424296	0.000305677	0.00207199		458.487	-0.110217	0.360388	0.662883
NCU00834	0	31.5734	0.525466	0.141876	0.220285		31.5734	-1.00951	0.0157594	0.0423267		31.5734	-0.634255	0.117794	0.208029		31.5734	-0.181613	0.63424	0.789914		31.5734	0.0207781	0.951744	0.972491		31.5734	-0.640169	0.0980867	0.335075
NCU00835	0	149.846	-1.80465	0.00364183	0.00956416		149.846	-2.68762	1.92246e-05	0.000148667	down	149.846	-2.52745	5.82662e-05	0.000407448	down	149.846	-2.27748	0.00026943	0.00242852	down	149.846	-2.10674	0.000621562	0.00372474	down	149.846	-1.46748	0.0173422	0.120726
NCU00836	0	13.531	4.70781	3.31617e-07	2.50227e-06	up	13.531	4.18846	6.41008e-06	5.77561e-05	up	13.531	1.99893	0.0486179	0.104406		13.531	2.79829	0.00380668	0.0207422	up	13.531	2.21538	0.0191492	0.0604069		13.531	-0.748201	0.585336	0.816
NCU00837	0	66.7262	-0.123165	0.78495	0.85635		66.7262	-0.15404	0.732567	0.810936		66.7262	-0.690835	0.136681	0.232823		66.7262	-0.0337063	0.940347	0.972839		66.7262	0.18888	0.665137	0.789639		66.7262	-0.142591	0.749886	0.896114
NCU00838	0	473.906	-0.452896	0.284693	0.39317		473.906	-0.461363	0.275551	0.395389		473.906	-0.826919	0.0518309	0.109654		473.906	0.890813	0.0340244	0.11064		473.906	0.628252	0.133979	0.265228		473.906	0.577085	0.169656	0.449489
NCU00839	0	47.0605	5.32937	2.49977e-15	8.26044e-14	up	47.0605	-0.918771	0.287118	0.407469		47.0605	-2.58043	0.0345246	0.0803271		47.0605	-0.0655956	0.933864	0.969635		47.0605	-0.248262	0.734269	0.838527		47.0605	0.0417098	0.956278	0.984494
NCU00840	0	3.59191	0.756449	0.463038	0.579281		3.59191	-1.55736	0.220666	0.334845		3.59191	-1.39308	0.272637	0.397204		3.59191	-1.03637	0.387647	0.592021		3.59191	-2.31642	0.0552502	0.139292		3.59191	-1.75668	0.165012	0.442625
NCU00841	0	1.60941	4.88094	0.291395	0.400579		1.60941	-0.85321	0.859918	1		1.60941	-0.69817	0.885177	1		1.60941	-0.75326	0.876187	1		1.60941	-1.97654	0.682666	1		1.60941	-1.08612	0.822249	1
NCU00842	0	2.727	6.4748	0.0278563	0.0555446		2.727	-0.0162704	0.996028	0.998477		2.727	1.61974	0.618959	0.720244		2.727	0.0836804	0.979574	1		2.727	0.268397	0.934334	0.962314		2.727	-0.249181	0.93923	1
NCU00843	0	486.04	0.444688	0.0746051	0.128517		486.04	0.226238	0.365368	0.490654		486.04	0.519572	0.0372638	0.0851934		486.04	-0.0506639	0.840321	0.917861		486.04	0.0256979	0.917298	0.951945		486.04	0.194038	0.436293	0.722811
NCU00844	0	19.3568	3.10138	2.28815e-08	2.16888e-07	up	19.3568	4.14752	1.43017e-14	7.52458e-13	up	19.3568	-2.8299	0.0625644	0.127686		19.3568	-0.292642	0.71047	0.844116		19.3568	-0.229766	0.722128	0.830997		19.3568	0.784819	0.217941	0.51129
NCU00845	0	52.3312	4.12807	1.18356e-07	9.8985e-07	up	52.3312	4.33052	2.67136e-08	4.40985e-07	up	52.3312	-1.54392	0.125274	0.217672		52.3312	-0.236838	0.786027	0.886088		52.3312	-1.26079	0.142905	0.277856		52.3312	-1.72474	0.0781855	0.2967
NCU00846	0	57.2821	0.928578	0.0751665	0.129321		57.2821	1.65902	0.00102731	0.00441654		57.2821	1.69914	0.000807476	0.00380064		57.2821	2.85992	6.61762e-09	2.99802e-07	up	57.2821	2.80632	8.31135e-09	2.25757e-07	up	57.2821	0.188527	0.724633	0.887731
NCU00847	0	569.178	0.974859	0.0173659	0.0370557		569.178	0.346664	0.398566	0.523387		569.178	0.72283	0.078095	0.151944		569.178	-0.189688	0.645296	0.796995		569.178	0.0917438	0.822709	0.897547		569.178	-0.252329	0.539652	0.792201
NCU00848	0	1238.39	0.137187	0.893927	0.93531		1238.39	0.0982573	0.923917	0.94849		1238.39	2.15024	0.036498	0.0838809		1238.39	2.16905	0.0348879	0.112824		1238.39	1.40394	0.17207	0.316925		1238.39	-2.47234	0.0166608	0.116923
NCU00849	0	80.8822	-0.480424	0.100479	0.165815		80.8822	-1.42605	6.85867e-06	6.11743e-05		80.8822	-1.1606	0.000210658	0.00122759		80.8822	0.450208	0.105183	0.249492		80.8822	-0.516968	0.0602023	0.148556		80.8822	-0.866131	0.0032494	0.0405145
NCU00850	0	52.9414	2.51237	5.45763e-07	3.95019e-06	up	52.9414	-2.37019	0.000560109	0.00269358	down	52.9414	1.88733	0.000195258	0.00116065		52.9414	-0.300995	0.583756	0.756503		52.9414	0.259321	0.611328	0.748477		52.9414	-0.098306	0.853576	0.941696
NCU00851	0	0.22121	0.0543333	0.991821	0.997555		0.22121	1.38833	0.79316	1		0.22121	0.138746	0.979118	1		0.22121	1.51825	0.774503	1		0.22121	0.413632	0.937618	1		0.22121	-0.2492	0.962503	1
NCU00852	0	4.33878	-1.46388	0.457018	0.573263		4.33878	-1.48456	0.448585	0.572173		4.33878	-0.384218	0.833426	0.88937		4.33878	2.34531	0.166662	0.343026		4.33878	0.092235	0.957231	0.974429		4.33878	-1.71814	0.380484	0.680937
NCU00853	0	78.8965	-1.12822	0.0018636	0.00530253		78.8965	-2.22887	1.09911e-08	1.95868e-07	down	78.8965	-1.85725	1.21662e-06	1.39658e-05		78.8965	-1.00523	0.00534739	0.0273955		78.8965	-1.25635	0.00030776	0.00208133		78.8965	-1.46356	5.60204e-05	0.0023305
NCU00854	0	31.4192	-1.10186	0.00379181	0.00988761		31.4192	-1.83249	1.29456e-05	0.000106344		31.4192	-1.50747	0.000225348	0.00129762		31.4192	-0.646421	0.0739461	0.194663		31.4192	-1.32001	0.000121544	0.000942393		31.4192	-0.676115	0.0540234	0.237288
NCU00855	0	242.143	-2.28518	0.00201465	0.00569007	down	242.143	-5.51439	1.94797e-12	7.20422e-11	down	242.143	-3.68286	9.09901e-07	1.0695e-05	down	242.143	-6.05464	7.4494e-14	9.62084e-12	down	242.143	-5.23619	3.63926e-12	1.98564e-10	down	242.143	-3.31317	8.38553e-06	0.000500414	down
NCU00856	0	145.983	-0.952666	0.047336	0.0874703		145.983	-0.630296	0.186269	0.294954		145.983	-0.767699	0.109267	0.196503		145.983	-0.724603	0.129909	0.288676		145.983	-0.62594	0.183644	0.332617		145.983	0.315667	0.502341	0.766641
NCU00857	0	139.158	0.0429523	0.910805	0.944513		139.158	0.448874	0.236804	0.354122		139.158	0.233217	0.541959	0.655497		139.158	0.396593	0.297331	0.503582		139.158	0.317741	0.395895	0.565317		139.158	0.129149	0.733995	0.89028
NCU00859	0	203.215	1.44553	0.0367418	0.0705039		203.215	0.921249	0.18471	0.293431		203.215	3.97878	6.86867e-09	1.36008e-07	up	203.215	2.16914	0.00165731	0.0106385	up	203.215	1.32064	0.0551475	0.13914		203.215	-1.30575	0.070091	0.278337
NCU00860	0	211.696	-1.11194	9.44359e-05	0.000399373		211.696	-1.11737	8.4228e-05	0.000536764		211.696	-1.38199	1.70799e-06	1.88948e-05		211.696	-1.07542	0.000158515	0.00158754		211.696	-1.24828	6.6694e-06	8.03144e-05		211.696	-0.799005	0.00428053	0.0479998
NCU00861	0	3.9786	-1.5963	0.11154	0.180861		3.9786	-2.08246	0.055313	0.114417		3.9786	-0.933571	0.306348	0.432678		3.9786	-2.55277	0.0385063	0.121427		3.9786	-1.12097	0.163251	0.305715		3.9786	-1.55637	0.0999501	0.337871
NCU00862	0	173.372	0.39369	0.324581	0.436311		173.372	0.810628	0.0406777	0.0898652		173.372	0.50053	0.210192	0.324509		173.372	1.52168	0.000107446	0.00116947		173.372	1.43935	0.000220499	0.0015743		173.372	0.555533	0.160841	0.43766
NCU00863	0	199.298	0.660774	0.0390892	0.0742796		199.298	0.197528	0.54078	0.654429		199.298	0.374716	0.245646	0.366396		199.298	0.376832	0.242353	0.441494		199.298	0.552775	0.0799607	0.183007		199.298	0.51199	0.108931	0.355692
NCU00864	0	617.071	-1.03446	0.00662549	0.0160844		617.071	-0.291209	0.441889	0.565847		617.071	-0.185279	0.624738	0.725441		617.071	-0.00448873	0.990533	0.994872		617.071	-0.00484203	0.989746	0.994924		617.071	0.154932	0.681516	0.86534
NCU00865	0	2522.24	-3.88657	9.04995e-11	1.37007e-09	down	2522.24	-2.8006	2.81035e-06	2.78796e-05	down	2522.24	-1.64782	0.00579195	0.0193481		2522.24	-2.40972	5.52596e-05	0.000685045	down	2522.24	-2.75541	3.93809e-06	5.07416e-05	down	2522.24	-0.184418	0.757263	0.899545
NCU00866	0	21.3729	2.9305	0.0468705	0.0867606		21.3729	-3.00348	0.0735277	0.144297		21.3729	-2.57109	0.117784	0.208029		21.3729	-6.01855	0.00348461	0.0193781	down	21.3729	-2.52056	0.102156	0.218033		21.3729	-0.492552	0.743215	0.893987
NCU00867	0	5237.8	-1.198	1.7172e-09	2.0316e-08		5237.8	-0.749917	0.000158758	0.00090775		5237.8	-0.475836	0.016512	0.0449491		5237.8	-0.0619005	0.754874	0.868262		5237.8	-0.302625	0.126371	0.254788		5237.8	0.0872437	0.659644	0.855628
NCU00868	0	820.869	-0.618344	0.144761	0.224002		820.869	0.109796	0.795036	0.857797		820.869	0.424541	0.31493	0.441292		820.869	0.537326	0.20321	0.394306		820.869	0.322461	0.444289	0.609604		820.869	-0.276824	0.512697	0.773965
NCU00869	0	260.868	-1.4421	3.25587e-05	0.000155849		260.868	-1.52506	1.12339e-05	9.46581e-05		260.868	-1.1051	0.00135357	0.00588499		260.868	-0.163242	0.63015	0.787847		260.868	-0.838184	0.0129173	0.0443401		260.868	-0.345771	0.306943	0.611413
NCU00870	0	204.465	-0.482154	0.0831218	0.141158		204.465	-0.283639	0.303536	0.424921		204.465	-0.272163	0.325792	0.452521		204.465	0.385832	0.155246	0.327566		204.465	0.035573	0.894217	0.939235		204.465	-0.756255	0.00651094	0.0637321
NCU00871	0	12.8699	3.44863	1.03388e-06	6.95278e-06	up	12.8699	2.17221	0.00284739	0.0103445	up	12.8699	0.825885	0.298781	0.425476		12.8699	-4.39588	0.00596321	0.0297748	down	12.8699	-2.63179	0.0156731	0.0515766		12.8699	-0.485321	0.58092	0.813514
NCU00872	0	28.4709	0.598955	0.0603914	0.107791		28.4709	0.0888657	0.791018	0.854848		28.4709	-0.785827	0.0459732	0.10019		28.4709	0.0112483	0.973859	0.989872		28.4709	-0.345644	0.266979	0.433792		28.4709	-0.48914	0.163976	0.441608
NCU00873	0	75.7177	1.52484	4.19888e-06	2.50235e-05		75.7177	1.04919	0.00177612	0.00694957		75.7177	0.156659	0.657843	0.753332		75.7177	0.0455532	0.897911	0.950761		75.7177	0.344484	0.298437	0.468412		75.7177	0.00790987	0.981892	0.994418
NCU00874	0	153.616	-0.318788	0.518219	0.632462		153.616	0.43544	0.372898	0.498646		153.616	-0.816236	0.101733	0.185882		153.616	0.452044	0.355288	0.561312		153.616	-0.308964	0.526013	0.678353		153.616	-0.15636	0.749853	0.896114
NCU00875	0	31.8326	-1.44229	0.0516102	0.0942162		31.8326	-1.03478	0.153861	0.255457		31.8326	-1.26632	0.0860442	0.163653		31.8326	-0.284632	0.688911	0.829185		31.8326	-0.871421	0.214335	0.373009		31.8326	-0.0867483	0.901796	0.963601
NCU00876	0	396.136	-2.48829	0.0101506	0.0232322	down	396.136	-0.800678	0.406119	0.531116		396.136	-3.74347	0.000127166	0.000806325	down	396.136	-1.03223	0.284395	0.487591		396.136	-1.63948	0.0888313	0.198028		396.136	0.152893	0.873829	0.95098
NCU00877	0	93.6977	-1.42261	0.000622443	0.00204416		93.6977	-0.670173	0.0960483	0.178019		93.6977	-0.535709	0.183621	0.292279		93.6977	-0.922757	0.0235114	0.0843466		93.6977	-1.04932	0.00799137	0.030565		93.6977	-1.27481	0.00176787	0.0275133
NCU00878	0	7327.35	-2.93641	1.81128e-06	1.15409e-05	down	7327.35	-1.78233	0.0037366	0.0128613		7327.35	-1.33751	0.029543	0.0710674		7327.35	0.131338	0.830737	0.913272		7327.35	-0.223935	0.715493	0.826947		7327.35	0.0459089	0.940437	0.978545
NCU00879	0	1233.15	-0.645699	0.0205739	0.042805		1233.15	-0.617877	0.0266085	0.0640027		1233.15	-0.529281	0.05762	0.119695		1233.15	-0.308884	0.267123	0.469705		1233.15	-0.391128	0.158292	0.299193		1233.15	0.00367727	0.989431	0.997164
NCU00880	0	869.073	-0.275826	0.141333	0.219655		869.073	0.365811	0.0483783	0.103164		869.073	0.18824	0.312063	0.438247		869.073	0.404844	0.0290339	0.0982137		869.073	0.467478	0.0107575	0.0382791		869.073	0.0929052	0.616305	0.832094
NCU00881	0	1379.68	0.247469	0.256378	0.360338		1379.68	-0.154944	0.478173	0.599089		1379.68	-0.527915	0.0161025	0.043956		1379.68	-0.967601	1.11774e-05	0.000175213		1379.68	-0.883021	5.09748e-05	0.000456039		1379.68	0.0754003	0.729313	0.888962
NCU00882	0	34.0345	0.879894	0.0224712	0.0462448		34.0345	1.15509	0.00215446	0.00818361		34.0345	0.624028	0.115587	0.205074		34.0345	0.97774	0.0107985	0.046743		34.0345	0.344248	0.351934	0.522375		34.0345	0.266206	0.500902	0.76605
NCU00883	0	19.7651	1.41643	0.00300527	0.00807387		19.7651	1.42665	0.00265892	0.00976006		19.7651	0.788791	0.119591	0.210109		19.7651	0.578577	0.261265	0.463047		19.7651	0.752095	0.103982	0.22099		19.7651	0.897383	0.0642598	0.264306
NCU00884	0	2733.05	-1.21762	0.000701178	0.0022693		2733.05	0.13606	0.703969	0.789353		2733.05	0.902871	0.0116308	0.0337066		2733.05	0.558024	0.118997	0.271849		2733.05	0.743881	0.0374985	0.10374		2733.05	-0.116667	0.744574	0.894584
NCU00885	0	2.04748	1.34969	0.237341	0.338257		2.04748	-1.52323	0.378333	0.503856		2.04748	0.601889	0.627148	0.72738		2.04748	0.152901	0.906666	1		2.04748	-0.0728553	0.950106	0.971966		2.04748	-0.769736	0.590796	1
NCU00886	0	52.5926	1.25804	8.79987e-06	4.83538e-05		52.5926	1.35816	1.22699e-06	1.36764e-05		52.5926	0.0889507	0.780417	0.849713		52.5926	0.662408	0.0260602	0.0905268		52.5926	0.524498	0.0568475	0.142022		52.5926	-0.715576	0.034302	0.183106
NCU00887	0	4.37289	0.369761	0.768653	0.844241		4.37289	0.176599	0.889232	0.92437		4.37289	-0.0186281	0.988597	0.993462		4.37289	1.2196	0.310756	0.518106		4.37289	-0.376352	0.758558	0.854697		4.37289	0.710036	0.558184	0.799559
NCU00889	0	397.444	-1.54758	1.03187e-15	3.56981e-14		397.444	-1.38235	3.72933e-13	1.56969e-11		397.444	-0.835634	7.57574e-06	6.91042e-05		397.444	-0.51715	0.00493978	0.0256412		397.444	-0.798766	8.66561e-06	0.000100519		397.444	-0.267025	0.139997	0.409531
NCU00890	0	87.3052	-1.34987	0.110811	0.179904		87.3052	0.177438	0.825335	0.879878		87.3052	-0.261318	0.74845	0.826015		87.3052	3.51114	7.60996e-06	0.000128111	up	87.3052	2.19512	0.00514735	0.02134	up	87.3052	-0.151103	0.851193	0.94066
NCU00891	0	663.808	0.140871	0.675429	0.771103		663.808	0.495936	0.139183	0.236629		663.808	0.432227	0.198132	0.310292		663.808	0.920897	0.00593376	0.0296791		663.808	0.875185	0.00863932	0.0323161		663.808	1.50848	6.09007e-06	0.000390351
NCU00892	0	300.302	1.2985	7.35991e-07	5.15194e-06		300.302	0.783746	0.00299983	0.0107655		300.302	1.00453	0.000139831	0.000873477		300.302	0.276953	0.300774	0.506934		300.302	0.194458	0.457863	0.620962		300.302	0.17548	0.509638	0.772041
NCU00893	0	38.3628	-2.12328	0.00365362	0.00958989	down	38.3628	-0.539472	0.419286	0.544431		38.3628	0.576798	0.37697	0.504244		38.3628	-0.649192	0.334457	0.541856		38.3628	-1.09825	0.095091	0.207478		38.3628	0.202722	0.75612	0.899465
NCU00894	0	1970.81	0.924914	0.0194781	0.04088		1970.81	0.857434	0.0303263	0.0709137		1970.81	0.898754	0.0232143	0.0588166		1970.81	0.315492	0.425912	0.624646		1970.81	0.561133	0.156089	0.295875		1970.81	-0.656245	0.0981485	0.335153
NCU00895	0	1694.77	-1.15566	4.0256e-14	1.11174e-12		1694.77	-0.947243	4.79669e-10	1.12929e-08		1694.77	-1.10838	4.29735e-13	1.76671e-11		1694.77	-0.656842	1.49675e-05	0.000226423		1694.77	-0.731232	1.1064e-06	1.69489e-05		1694.77	-0.128605	0.392481	0.68899
NCU00896	0	801.683	-0.779516	0.0422342	0.0794679		801.683	-0.767002	0.0455739	0.0984428		801.683	-0.631105	0.099976	0.183347		801.683	-0.810698	0.0346983	0.112325		801.683	-0.799067	0.0366187	0.101816		801.683	-0.975748	0.010967	0.0888556
NCU00897	0	286.264	-1.4163	4.72552e-12	8.94953e-11		286.264	-0.822844	2.86652e-05	0.000212026		286.264	-0.933522	2.88748e-06	2.96428e-05		286.264	-0.519046	0.00769249	0.0363534		286.264	-0.79818	2.32304e-05	0.000234936		286.264	-0.114361	0.546523	0.796005
NCU00898	0	349.679	-0.927104	9.33362e-06	5.09653e-05		349.679	-0.391081	0.0548564	0.113714		349.679	-0.558211	0.00681996	0.0219336		349.679	-0.00357174	0.985873	0.992988		349.679	-0.0746941	0.7043	0.82009		349.679	0.371907	0.0606857	0.254292
NCU00899	0	1102.67	-2.53327	1.09139e-07	9.24739e-07	down	1102.67	-2.15309	6.13698e-06	5.56928e-05	down	1102.67	-2.26554	2.00215e-06	2.16875e-05	down	1102.67	-2.18274	4.60763e-06	8.48294e-05	down	1102.67	-2.64105	2.76321e-08	6.5833e-07	down	1102.67	-1.5859	0.000845978	0.0168282
NCU00900	0	476.209	-1.62257	0.010824	0.0245505		476.209	-1.56014	0.0142291	0.0388422		476.209	-1.43615	0.0240467	0.0605578		476.209	-1.59538	0.0122237	0.0512967		476.209	-1.43715	0.0235286	0.0712712		476.209	-1.66728	0.00876996	0.0769935
NCU00901	0	216.231	-0.857752	4.53793e-07	3.31962e-06		216.231	-0.563581	0.000571267	0.00273682		216.231	-0.654665	9.5404e-05	0.000626971		216.231	-0.247786	0.122336	0.277476		216.231	-0.198352	0.180698	0.328234		216.231	0.273904	0.0699789	0.278022
NCU00902	0	571.294	-0.311577	0.104758	0.171812		571.294	0.0131764	0.944735	0.964151		571.294	0.106083	0.57731	0.685037		571.294	0.285303	0.131856	0.291994		571.294	0.341343	0.0664458	0.159596		571.294	0.384955	0.0404567	0.201941
NCU00903	0	2647.01	0.0883094	0.502546	0.61679		2647.01	0.69774	9.68507e-08	1.42203e-06		2647.01	0.459919	0.000460058	0.00238641		2647.01	0.481922	0.000239368	0.00220112		2647.01	0.617164	2.09757e-06	2.91058e-05		2647.01	0.0880746	0.50227	0.766641
NCU00904	0	683.87	-0.954349	0.000106696	0.000443588		683.87	-0.291939	0.230068	0.346022		683.87	0.395688	0.101742	0.185882		683.87	-0.260698	0.28425	0.487591		683.87	0.0582312	0.808484	0.887438		683.87	0.389764	0.105881	0.349958
NCU00905	0	471.721	0.88895	0.0165669	0.0355647		471.721	0.24865	0.503979	0.621206		471.721	-0.0227025	0.951498	0.969263		471.721	-0.238739	0.522996	0.70766		471.721	-0.074149	0.841443	0.908272		471.721	-0.194554	0.601581	0.824305
NCU00906	0	60.2658	1.53558	4.95389e-06	2.89991e-05		60.2658	0.18952	0.59972	0.7036		60.2658	1.18401	0.00054809	0.00278104		60.2658	-0.0930937	0.803052	0.895718		60.2658	1.03374	0.00169396	0.00862495		60.2658	0.385231	0.271651	0.573316
NCU00907	0	0.216498	-1.12083	0.831648	0.891563		0.216498	-1.19145	0.82123	1		0.216498	-1.03641	0.844173	1		0.216498	-1.0915	0.836004	1		0.216498	-0.91243	0.862451	1		0.216498	-0.0103116	0.998438	1
NCU00911	0	4506.85	-0.1327	0.716373	0.803018		4506.85	0.302321	0.407599	0.532403		4506.85	0.717414	0.0493491	0.105668		4506.85	1.21191	0.000895484	0.00645181		4506.85	0.962177	0.00834166	0.0315498		4506.85	0.248404	0.496166	0.762174
NCU00912	0	72.3116	0.380108	0.177042	0.265508		72.3116	0.0047173	0.986911	0.992752		72.3116	-0.0655306	0.822841	0.881801		72.3116	-0.394887	0.18809	0.373633		72.3116	0.0234621	0.930788	0.959847		72.3116	-0.0912577	0.748577	0.895516
NCU00913	0	505.794	0.214437	0.185589	0.276122		505.794	-0.131932	0.419718	0.544692		505.794	0.0613085	0.707272	0.792543		505.794	-0.0102624	0.949907	0.977656		505.794	-0.0532629	0.736984	0.840542		505.794	-0.129394	0.425016	0.712726
NCU00914	0	870.566	-1.27103	1.77208e-12	3.6837e-11		870.566	-1.08157	1.55973e-09	3.34622e-08		870.566	-0.981715	4.39755e-08	7.39516e-07		870.566	-0.763059	1.87063e-05	0.000275751		870.566	-0.986343	2.01195e-08	5.03784e-07		870.566	-0.324544	0.0655163	0.267034
NCU00915	0	7345.47	-1.3817	1.76609e-09	2.08173e-08		7345.47	-1.12844	8.73825e-07	1.01896e-05		7345.47	-1.13769	7.16309e-07	8.67323e-06		7345.47	-0.698463	0.00232073	0.0140527		7345.47	-0.717181	0.00174161	0.00881174		7345.47	0.27731	0.225984	0.51974
NCU00916	0	1134.53	-1.19905	0.0359848	0.069265		1134.53	-1.43167	0.0123044	0.0344098		1134.53	-1.76288	0.00207347	0.00837252		1134.53	-1.59903	0.00519648	0.026765		1134.53	-1.65264	0.00381736	0.0167869		1134.53	-1.70866	0.00281355	0.0371123
NCU00917	0	190.961	-0.772474	0.00185144	0.0052789		190.961	-0.193133	0.421264	0.546215		190.961	-0.374819	0.12428	0.216413		190.961	-0.0865865	0.718317	0.847561		190.961	-0.132961	0.566539	0.712223		190.961	0.0785964	0.73896	0.891977
NCU00918	0	871.978	-1.56139	4.07526e-36	1.00136e-33		871.978	-0.614313	1.38825e-07	1.97915e-06		871.978	-0.594407	4.12153e-07	5.29509e-06		871.978	-0.1945	0.0909023	0.225251		871.978	-0.298306	0.00749082	0.0290765		871.978	0.203158	0.0708938	0.280066
NCU00919	0	173.796	1.43155	0.0247865	0.0504202		173.796	0.238773	0.709302	0.793509		173.796	0.315445	0.622511	0.723419		173.796	-1.77142	0.00701551	0.0337814		173.796	-1.13533	0.0767426	0.17748		173.796	-1.48867	0.0219293	0.139014
NCU00920	0	352.134	0.724873	0.0116979	0.0263086		352.134	0.960354	0.000801953	0.00361472		352.134	0.479604	0.0969006	0.178998		352.134	0.322272	0.265453	0.467909		352.134	0.534782	0.0604129	0.148827		352.134	0.00949717	0.973813	0.992019
NCU00921	0	171.982	-1.06179	0.00081527	0.00259215		171.982	-0.475799	0.123739	0.215598		171.982	-1.15642	0.000302491	0.00165863		171.982	-0.0270644	0.929521	0.968237		171.982	-0.453154	0.132438	0.262943		171.982	0.488556	0.104502	0.347458
NCU00922	0	0.292264	-1.88851	0.71888	0.805169		0.292264	-1.95912	0.708865	1		0.292264	-1.80408	0.730972	1		0.292264	-1.85917	0.72309	1		0.292264	-3.08245	0.556886	1		0.292264	-0.672119	0.897854	1
NCU00923	0	420.492	0.0827295	0.704613	0.793642		420.492	0.217939	0.315652	0.437655		420.492	0.0286558	0.895902	0.93229		420.492	0.196947	0.365793	0.571494		420.492	0.147617	0.489542	0.646313		420.492	0.601119	0.00513243	0.0544919
NCU00924	0	240.484	-0.297817	0.146558	0.226271		240.484	-0.17442	0.390554	0.515162		240.484	-0.272207	0.185939	0.295065		240.484	-0.128944	0.526627	0.710573		240.484	-0.0374123	0.847664	0.912051		240.484	0.213536	0.28116	0.584552
NCU00925	0	418.882	1.57007	0.0151286	0.0328004		418.882	0.624286	0.33475	0.459022		418.882	0.806209	0.212852	0.327653		418.882	-0.652825	0.315436	0.523087		418.882	-0.447388	0.489355	0.646313		418.882	-1.08401	0.0957152	0.331548
NCU00926	0	69.047	-0.150439	0.586956	0.69588		69.047	0.287138	0.27487	0.394595		69.047	0.513456	0.0494126	0.105753		69.047	0.343819	0.192745	0.379918		69.047	0.36343	0.134785	0.266405		69.047	0.308223	0.231143	0.524819
NCU00927	0	242.547	0.248829	0.194834	0.287246		242.547	0.448589	0.0179762	0.0467327		242.547	0.421644	0.0273687	0.0668265		242.547	-0.322048	0.10542	0.249918		242.547	0.207775	0.259377	0.42494		242.547	0.225392	0.234277	0.529019
NCU00928	0	148.453	-0.316408	0.398221	0.514862		148.453	-0.405362	0.279378	0.399776		148.453	-0.476832	0.206021	0.320069		148.453	-0.233299	0.532784	0.716089		148.453	-0.135722	0.71077	0.823979		148.453	0.267593	0.467334	0.743626
NCU00929	0	220.295	-1.57051	0.00259355	0.00709302		220.295	-1.7413	0.000850723	0.00379583		220.295	-1.62498	0.00186092	0.0076328		220.295	-1.88353	0.000321951	0.00281683		220.295	-1.86673	0.000308984	0.00208801		220.295	-1.41721	0.00632811	0.0625796
NCU00930	0	422.001	0.291367	0.0977746	0.16219		422.001	0.0012556	0.994346	0.997559		422.001	0.0789561	0.65673	0.752507		422.001	-0.25443	0.156483	0.328591		422.001	-0.13705	0.428003	0.59483		422.001	-0.136668	0.439114	0.724987
NCU00931	0	138.974	2.20764	0.000450719	0.00155986	up	138.974	1.06963	0.0907231	0.170291		138.974	1.16521	0.0654646	0.132353		138.974	-0.339296	0.597731	0.765906		138.974	0.0835647	0.894773	0.939428		138.974	-0.824109	0.201261	0.490628
NCU00932	0	32.8457	4.80814	1.02018e-12	2.19693e-11	up	32.8457	2.20604	0.00264897	0.00973565	up	32.8457	5.69048	1.80862e-17	1.44022e-15	up	32.8457	1.10898	0.17516	0.355037		32.8457	2.5654	0.000193776	0.00141436	up	32.8457	-0.393857	0.687375	0.868681
NCU00934	0	0.83479	-0.131593	0.965485	0.982713		0.83479	-0.158525	0.958365	1		0.83479	-2.55458	0.426805	1		0.83479	-2.60967	0.416902	1		0.83479	-1.38596	0.649368	1		0.83479	-1.52463	0.634478	1
NCU00935	0	3226.9	0.751731	8.51938e-05	0.000364633		3226.9	0.135701	0.478997	0.599611		3226.9	0.653069	0.000645749	0.00318159		3226.9	0.43989	0.0216351	0.079494		3226.9	0.412973	0.030563	0.0885434		3226.9	-0.0795242	0.678221	0.863837
NCU00936	0	572.061	0.360826	0.181869	0.27174		572.061	0.893604	0.000868963	0.00386335		572.061	1.18502	9.80565e-06	8.60441e-05		572.061	0.895052	0.000861817	0.00625088		572.061	1.33093	5.56975e-07	9.39523e-06		572.061	0.430298	0.109682	0.356835
NCU00937	0	85.8257	0.20089	0.785761	0.856941		85.8257	-2.23714	0.00336296	0.0118004	down	85.8257	-1.78727	0.0182943	0.048662		85.8257	-2.17641	0.00436953	0.023254	down	85.8257	-1.823	0.0142212	0.047661		85.8257	-0.233497	0.75223	0.896828
NCU00938	0	1217.7	-1.80535	1.23462e-19	7.33377e-18		1217.7	-1.94363	1.88947e-22	2.84105e-20		1217.7	-2.47801	2.28971e-34	1.19051e-31	down	1217.7	-1.44915	2.54677e-13	3.01879e-11		1217.7	-1.52627	6.37957e-15	5.03474e-13		1217.7	-0.257853	0.186795	0.47426
NCU00939	0	1440.38	-2.27297	5.04752e-10	6.65342e-09	down	1440.38	-2.13197	5.26878e-09	1.00152e-07	down	1440.38	-1.99524	4.66517e-08	7.75102e-07		1440.38	-1.21459	0.000847874	0.00619127		1440.38	-1.6892	3.34846e-06	4.42407e-05		1440.38	-1.04631	0.00400397	0.0463807
NCU00940	0	0.479636	-0.561114	0.888643	0.931788		0.479636	-0.631741	0.874742	1		0.479636	1.01321	0.799906	1		0.479636	1.93457	0.617458	1		0.479636	1.7562	0.644394	1		0.479636	-0.86465	0.829178	1
NCU00941	0	119.402	-2.03656	1.16368e-20	7.74414e-19	down	119.402	-1.97428	2.86993e-20	3.09357e-18		119.402	-1.41009	3.07793e-12	1.07582e-10		119.402	-2.0844	4.50487e-21	1.54615e-18	down	119.402	-2.08421	2.86303e-28	1.40591e-25	down	119.402	-1.22379	1.07609e-10	2.68585e-08
NCU00943	0	18.0118	0.930565	0.160301	0.243952		18.0118	0.373458	0.579662	0.687091		18.0118	-0.571569	0.426003	0.550657		18.0118	-1.23322	0.103953	0.247452		18.0118	-1.21529	0.0778369	0.179354		18.0118	-0.0256895	0.969821	0.991243
NCU00944	0	366.951	-1.20453	9.33915e-08	7.99081e-07		366.951	0.11562	0.587795	0.693939		366.951	-0.304883	0.16019	0.263182		366.951	-0.164096	0.446637	0.642519		366.951	-0.246414	0.240808	0.403585		366.951	1.1005	1.35877e-07	1.52694e-05
NCU00945	0	224.342	0.530871	0.114223	0.184399		224.342	1.06356	0.00139177	0.0057012		224.342	1.08739	0.00110615	0.00495805		224.342	0.715335	0.0327811	0.107527		224.342	0.962858	0.00346624	0.0154582		224.342	0.467432	0.162415	0.439493
NCU00946	0	1.20018	5.7923	0.119059	0.190601		1.20018	0	1	1		1.20018	2.28333	0.564201	1		1.20018	0	1	1		1.20018	3.09286	0.410677	1		1.20018	0	1	1
NCU00947	0	32.5073	4.33528	7.58266e-08	6.59988e-07	up	32.5073	2.23207	0.00675082	0.0211597	up	32.5073	1.83704	0.0277224	0.0674991		32.5073	0.36955	0.677365	0.82063		32.5073	1.88663	0.0205087	0.0637848		32.5073	-0.991735	0.307123	0.611486
NCU00948	0	0.872275	-0.17114	0.946019	0.968764		0.872275	-0.221904	0.929778	1		0.872275	-1.55882	0.539815	1		0.872275	-0.161123	0.949369	1		0.872275	2.01187	0.347189	1		0.872275	-0.467461	0.853079	1
NCU00949	0	67.4635	0.554249	0.182005	0.271844		67.4635	0.628151	0.128258	0.221723		67.4635	1.0083	0.0138533	0.03891		67.4635	0.81338	0.0481621	0.142673		67.4635	0.199552	0.621653	0.756025		67.4635	1.01353	0.0123508	0.0951787
NCU00950	0	118.272	1.20637	0.000264585	0.000974823		118.272	0.412522	0.220067	0.334336		118.272	0.398826	0.238163	0.35765		118.272	-0.488442	0.163134	0.337784		118.272	-0.158295	0.633345	0.765086		118.272	-0.495657	0.150476	0.423802
NCU00951	0	9130.81	1.21606	8.02408e-06	4.46803e-05		9130.81	1.47072	6.64715e-08	1.013e-06		9130.81	1.80376	3.4981e-11	1.04458e-09		9130.81	1.24772	4.63274e-06	8.49303e-05		9130.81	1.51355	2.6985e-08	6.47375e-07		9130.81	0.0583819	0.830406	0.934079
NCU00952	0	311.701	1.44981	0.000455113	0.00157223		311.701	1.31955	0.00142386	0.00580245		311.701	1.23151	0.00295342	0.0111944		311.701	0.311855	0.455149	0.649949		311.701	0.642294	0.119704	0.245036		311.701	0.147799	0.722867	0.886766
NCU00953	0	124.633	0.62929	0.0116029	0.0261195		124.633	0.295427	0.242056	0.359963		124.633	0.154856	0.546455	0.65887		124.633	-0.149855	0.565932	0.742759		124.633	0.253436	0.295624	0.465531		124.633	0.128129	0.61067	0.829216
NCU00954	0	225.14	-0.139825	0.484169	0.60031		225.14	-0.10836	0.58565	0.692177		225.14	-0.212582	0.29195	0.417903		225.14	0.0290807	0.883436	0.94247		225.14	-0.0110536	0.953579	0.972727		225.14	0.155728	0.422783	0.71091
NCU00955	0	525.234	-0.922758	0.00385271	0.0100355		525.234	-1.02378	0.00135027	0.00554604		525.234	-0.302311	0.341198	0.469539		525.234	-0.820789	0.0100881	0.0444389		525.234	-0.917427	0.00372005	0.0164161		525.234	-0.524374	0.0983216	0.335348
NCU00956	0	204.812	0.485296	0.10206	0.168048		204.812	0.302366	0.309556	0.431164		204.812	0.161888	0.589071	0.695445		204.812	-0.0889595	0.767846	0.875793		204.812	-0.131908	0.653589	0.780331		204.812	0.31498	0.287361	0.592174
NCU00957	0	3889.01	-0.816198	1.92751e-05	9.73711e-05		3889.01	-1.09215	1.11039e-08	1.97479e-07		3889.01	-1.25945	4.77528e-11	1.41166e-09		3889.01	-1.01541	1.08959e-07	3.54443e-06		3889.01	-1.15194	1.48719e-09	4.71157e-08		3889.01	-0.255512	0.179909	0.464948
NCU00958	0	602.748	0.21141	0.434272	0.550479		602.748	-0.184399	0.49677	0.614792		602.748	0.44444	0.099758	0.183128		602.748	-0.0343959	0.899064	0.951167		602.748	0.104599	0.696724	0.814381		602.748	-0.0599509	0.824473	0.931776
NCU00959	0	1707.36	0.890023	0.268075	0.374593		1707.36	0.136068	0.86558	0.910451		1707.36	1.06963	0.183177	0.29173		1707.36	-0.122495	0.878901	0.939949		1707.36	0.317525	0.692718	0.810985		1707.36	-0.8875	0.269779	0.571794
NCU00960	0	4.35582	-0.365052	0.717013	0.803548		4.35582	-0.434908	0.665881	0.757493		4.35582	-0.142298	0.886155	0.925526		4.35582	-1.6014	0.179366	0.361064		4.35582	-0.117922	0.897077	0.940872		4.35582	-2.51024	0.0587846	0.249223
NCU00961	0	1.42629	-3.90034	0.0539738	0.0979976		1.42629	-2.54918	0.203604	1		1.42629	-3.81588	0.0593915	1		1.42629	-0.826172	0.615176	1		1.42629	-1.6489	0.300443	1		1.42629	-2.73927	0.171512	1
NCU00962	0	409.893	-0.634528	0.0149282	0.0324172		409.893	-0.370035	0.152587	0.253661		409.893	0.620792	0.0150096	0.0415241		409.893	0.234726	0.359888	0.56551		409.893	-0.0709713	0.779743	0.869014		409.893	-0.347334	0.177234	0.461096
NCU00963	0	1165.77	3.20471	6.65598e-08	5.86069e-07	up	1165.77	2.11429	0.000369969	0.00189026	up	1165.77	2.50895	2.3784e-05	0.000188375	up	1165.77	0.886698	0.136055	0.298651		1165.77	1.11772	0.0597655	0.147602		1165.77	-0.730743	0.221212	0.514555
NCU00964	0	412.789	-0.115909	0.569962	0.680277		412.789	0.430868	0.0319199	0.0739411		412.789	0.27388	0.175737	0.282785		412.789	-0.0609489	0.764957	0.874165		412.789	-0.00222748	0.991047	0.996005		412.789	-0.0832247	0.68052	0.865029
NCU00965	0	375.267	-1.14726	2.3921e-05	0.000118041		375.267	-0.430326	0.106515	0.192593		375.267	-0.5785	0.0310096	0.0737605		375.267	-0.141455	0.594517	0.763831		375.267	-0.342592	0.192123	0.342857		375.267	-0.340782	0.198818	0.4871
NCU00966	0	561.351	-0.989666	4.77357e-05	0.000218794		561.351	-0.333852	0.164119	0.268688		561.351	-0.53066	0.0279251	0.0678555		561.351	-0.163308	0.495643	0.68653		561.351	-0.376094	0.112745	0.234539		561.351	0.443487	0.0615941	0.256258
NCU00967	0	530.965	0.442239	0.0378845	0.0723346		530.965	-0.134793	0.530924	0.645952		530.965	0.00156541	0.994196	0.996677		530.965	0.702237	0.00093889	0.0066811		530.965	-0.125799	0.551523	0.699715		530.965	0.318293	0.134047	0.399006
NCU00968	0	244.56	-1.28003	1.98429e-11	3.34779e-10		244.56	-0.888531	1.3933e-06	1.52229e-05		244.56	-0.875326	2.5144e-06	2.62394e-05		244.56	-0.809712	1.12219e-05	0.000175593		244.56	-0.848995	1.02593e-06	1.59091e-05		244.56	-0.209273	0.232705	0.527534
NCU00969	0	1499.07	-0.554097	1.32584e-06	8.70836e-06		1499.07	0.192459	0.0854002	0.162474		1499.07	0.21893	0.051047	0.108489		1499.07	0.289355	0.00970096	0.0432922		1499.07	0.291497	0.00793897	0.0304069		1499.07	0.143233	0.198717	0.4871
NCU00970	0	4.99182	-2.44311	0.0439795	0.0822512		4.99182	-0.910478	0.300429	0.42144		4.99182	-0.357395	0.667155	0.760161		4.99182	-1.41681	0.146549	0.314429		4.99182	-1.63589	0.0490123	0.127305		4.99182	0.591373	0.418172	0.707718
NCU00971	0	13799.8	0.700065	0.00130964	0.00389517		13799.8	0.314925	0.148318	0.248622		13799.8	0.530081	0.0149679	0.0414348		13799.8	-0.148454	0.495804	0.68654		13799.8	0.0253449	0.907352	0.946603		13799.8	-0.0494973	0.82029	0.929906
NCU00972	0	58.1859	0.747334	0.00907687	0.0211331		58.1859	-0.20287	0.524918	0.639875		58.1859	0.902806	0.00150397	0.00642348		58.1859	0.654896	0.0239425	0.0855385		58.1859	0.604051	0.0222932	0.0682776		58.1859	2.01782	4.82231e-15	2.04363e-12	up
NCU00973	0	6.9899	0.453312	0.501076	0.61548		6.9899	-0.752277	0.330744	0.455011		6.9899	-1.98037	0.0504089	0.107417		6.9899	-0.455846	0.544086	0.725322		6.9899	-0.341996	0.599828	0.73935		6.9899	0.141097	0.834262	0.935328
NCU00974	0	219.927	-0.654394	0.0981876	0.162678		219.927	-1.16389	0.00357503	0.012392		219.927	-0.777165	0.0504779	0.107538		219.927	0.41016	0.293242	0.499481		219.927	-0.172679	0.656593	0.782582		219.927	0.0556348	0.88666	0.957205
NCU00975	0	1573.56	-0.203574	0.827838	0.889515		1573.56	0.296075	0.750817	0.824611		1573.56	2.04937	0.0270683	0.0662761		1573.56	6.75288	2.80267e-13	3.19099e-11	up	1573.56	5.8241	2.99266e-10	1.12562e-08	up	1573.56	-0.104852	0.910548	0.966809
NCU00976	0	3.99776	-2.07857	0.0997767	0.164912		3.99776	-3.75936	0.0274376	0.0654578		3.99776	-5.03312	0.00359426	0.0130578	down	3.99776	-2.07254	0.101975	0.244497		3.99776	-0.823555	0.417772	0.585491		3.99776	-0.403986	0.697672	0.875174
NCU00977	0	298.602	1.46421	0.000299716	0.00108836		298.602	1.39765	0.000558135	0.0026886		298.602	1.11627	0.00598534	0.0198069		298.602	0.123754	0.762862	0.87331		298.602	0.374826	0.354418	0.524797		298.602	0.0275999	0.946185	0.981107
NCU00978	0	201.465	-0.0596612	0.757545	0.835969		201.465	-0.0964815	0.616922	0.717308		201.465	-0.287101	0.145888	0.244827		201.465	-0.22767	0.244909	0.443588		201.465	-0.0918663	0.616381	0.751785		201.465	0.272494	0.144943	0.416674
NCU00979	0	14638.8	1.36101	1.69437e-05	8.67369e-05		14638.8	0.631708	0.0458935	0.0989156		14638.8	0.712795	0.0242853	0.0610865		14638.8	-0.0896032	0.777109	0.880839		14638.8	0.264858	0.402506	0.571068		14638.8	-0.281785	0.373297	0.674772
NCU00980	0	280.491	0.106328	0.781928	0.854025		280.491	-0.537764	0.163859	0.268412		280.491	-0.650771	0.0931316	0.173927		280.491	-1.39579	0.000373652	0.00319803		280.491	-0.955971	0.0127343	0.0438994		280.491	-0.546741	0.155925	0.430241
NCU00981	0	406.034	0.263173	0.412047	0.528388		406.034	-0.218867	0.496814	0.614792		406.034	-0.0952178	0.767589	0.840005		406.034	-0.768211	0.0180692	0.0694286		406.034	-0.438927	0.169813	0.314209		406.034	-0.484594	0.132581	0.39655
NCU00983	0	1548.47	-0.274078	0.629042	0.732812		1548.47	-0.288567	0.611009	0.7124		1548.47	-0.607785	0.284253	0.40967		1548.47	-0.424701	0.454197	0.648971		1548.47	-0.645051	0.255318	0.420566		1548.47	-2.42199	2.08529e-05	0.00104301	down
NCU00984	0	615.822	-0.575102	0.474495	0.590301		615.822	-1.62475	0.0435978	0.0950101		615.822	-1.56348	0.0521947	0.110239		615.822	-1.58162	0.0495076	0.145471		615.822	-1.54003	0.0554277	0.139461		615.822	-3.4865	1.65292e-05	0.000888369	down
NCU00985	0	285.148	-4.17767	7.67588e-05	0.000332691	down	285.148	-3.05301	0.00349661	0.0121823	down	285.148	-1.46072	0.160137	0.263144		285.148	-1.51921	0.144059	0.310937		285.148	-1.71955	0.0977072	0.211157		285.148	-0.613172	0.554745	0.799457
NCU00986	0	4.78479	-2.01012	0.101899	0.167928		4.78479	-0.492386	0.587383	0.693638		4.78479	-1.36257	0.209302	0.323856		4.78479	0.99794	0.201953	0.392962		4.78479	0.0267995	0.972188	0.983538		4.78479	-0.152409	0.856596	0.942713
NCU00987	0	126.413	-0.74996	0.189047	0.28057		126.413	-0.688991	0.226687	0.341868		126.413	0.105138	0.852552	0.90232		126.413	-0.921605	0.107691	0.253759		126.413	-1.11194	0.0492167	0.127611		126.413	0.286539	0.610915	0.829216
NCU00988	0	83.7713	-1.8648	0.097856	0.162251		83.7713	-2.69475	0.0177464	0.0462988	down	83.7713	-1.73301	0.123807	0.215836		83.7713	-2.93791	0.0101626	0.0446501	down	83.7713	-4.11068	0.00031914	0.00213865	down	83.7713	0.609757	0.584157	0.815144
NCU00990	0	25.3236	-1.56704	0.0182055	0.0385469		25.3236	-3.0347	7.49961e-05	0.000490619	down	25.3236	-2.55115	0.000511623	0.0026125	down	25.3236	-1.4794	0.0251868	0.0885941		25.3236	-2.49665	0.000129301	0.00098866	down	25.3236	0.489227	0.419907	0.708739
NCU00992	0	891.961	0.361603	0.70442	0.793642		891.961	0.344024	0.718152	0.800775		891.961	0.968618	0.309396	0.435817		891.961	1.5025	0.114766	0.265313		891.961	1.44011	0.130528	0.260672		891.961	-2.74906	0.00414369	0.0472294	down
NCU00993	0	15.2472	1.59274	0.00224376	0.00625602		15.2472	0.251982	0.673916	0.764273		15.2472	2.2787	5.32038e-06	5.08399e-05	up	15.2472	1.34747	0.0115379	0.0491082		15.2472	1.04002	0.0373595	0.103485		15.2472	0.00829129	0.988971	0.997164
NCU00994	0	56.7383	1.5813	1.24906e-05	6.62779e-05		56.7383	-0.506911	0.236527	0.35387		56.7383	2.36147	2.1631e-11	6.64579e-10	up	56.7383	0.696083	0.0686907	0.184705		56.7383	1.585	5.35455e-06	6.61018e-05		56.7383	0.816931	0.0275805	0.161246
NCU00995	0	1504.35	-2.76645	7.21721e-10	9.27112e-09	down	1504.35	-2.39699	8.39952e-08	1.24989e-06	down	1504.35	1.0494	0.0178624	0.0476997		1504.35	-0.2206	0.619071	0.7815		1504.35	-0.236045	0.594212	0.734374		1504.35	0.440633	0.320069	0.626236
NCU00998	0	409.645	-0.993173	0.00645791	0.0157351		409.645	-1.22958	0.000764326	0.00347346		409.645	-0.831897	0.0224214	0.0572974		409.645	-0.82899	0.0228149	0.0825839		409.645	-1.07358	0.00298924	0.0136901		409.645	-1.09433	0.00263796	0.0354446
NCU00999	0	2324.21	-3.14184	0.00111983	0.0034057	down	2324.21	-3.91386	4.9819e-05	0.000343891	down	2324.21	-1.56948	0.103331	0.188202		2324.21	-1.31838	0.171186	0.349687		2324.21	-2.79352	0.0037395	0.0164855	down	2324.21	-3.98364	3.63414e-05	0.0016464	down
NCU01000	0	187.155	2.22433	4.75124e-12	8.98049e-11	up	187.155	0.861292	0.00850859	0.025583		187.155	0.665874	0.0435258	0.0958457		187.155	0.0474092	0.887601	0.9447		187.155	0.127281	0.695447	0.813111		187.155	-0.708867	0.0377656	0.193708
NCU01001	0	141.109	1.51615	2.2449e-05	0.000111697		141.109	0.859488	0.0172121	0.0454408		141.109	0.49976	0.17064	0.276496		141.109	-0.103182	0.780781	0.883612		141.109	-0.0166301	0.963087	0.978474		141.109	-0.675545	0.0710117	0.280066
NCU01002	0	897.337	-0.119215	0.511295	0.625263		897.337	0.0902264	0.617451	0.717639		897.337	0.0732013	0.686142	0.775253		897.337	0.345477	0.055239	0.157854		897.337	0.427923	0.0162392	0.0530051		897.337	0.0198415	0.912327	0.967209
NCU01004	0	1137.88	-1.23807	6.13699e-05	0.000273793		1137.88	-0.706998	0.0216554	0.0543629		1137.88	-0.907772	0.00325028	0.0120546		1137.88	-0.543642	0.0773415	0.201274		1137.88	-0.687706	0.0249644	0.0749271		1137.88	-0.705917	0.0217228	0.13811
NCU01005	0	80.073	0.889449	0.000642369	0.0020977		80.073	0.767116	0.00335329	0.0117916		80.073	0.413231	0.128572	0.222005		80.073	0.618192	0.0202012	0.0756059		80.073	0.657764	0.00812331	0.0309425		80.073	0.153543	0.568106	0.805344
NCU01006	0	523.576	0.523696	0.0692788	0.120468		523.576	0.917628	0.00139257	0.0057012		523.576	0.583857	0.0428905	0.0946825		523.576	0.54751	0.0575483	0.162734		523.576	0.768042	0.00715215	0.0280744		523.576	0.086909	0.763391	0.903365
NCU01007	0	485.243	0.480625	0.121989	0.194319		485.243	0.791254	0.0106551	0.0306676		485.243	0.69195	0.0258171	0.0638315		485.243	0.0987016	0.751845	0.866763		485.243	0.483338	0.11712	0.241592		485.243	0.0765648	0.80559	0.925405
NCU01008	0	187.807	0.333041	0.2269	0.326112		187.807	-0.0168613	0.951588	0.968703		187.807	0.0436978	0.875318	0.918612		187.807	-0.713472	0.0126892	0.0528901		187.807	-0.346808	0.203408	0.357795		187.807	-0.199563	0.471733	0.745281
NCU01009	0	32.5875	-2.93635	3.13304e-05	0.000150647	down	32.5875	-2.30023	0.000485606	0.00239394	down	32.5875	-2.34492	0.000468802	0.00242341	down	32.5875	-2.5884	0.000147777	0.00150261	down	32.5875	-3.09508	1.53193e-06	2.20892e-05	down	32.5875	0.349171	0.554397	0.799457
NCU01010	0	69.8562	-3.05249	1.48029e-06	9.58889e-06	down	69.8562	-2.29984	0.00014156	0.000828973	down	69.8562	-3.91044	1.67638e-08	3.07418e-07	down	69.8562	-2.34861	0.000113715	0.00121478	down	69.8562	-1.77417	0.00209268	0.0102534		69.8562	0.439069	0.439983	0.725641
NCU01011	0	4.05723	4.17822	0.00481138	0.0121816	up	4.05723	3.07696	0.0415524	0.0912727		4.05723	-0.433099	0.831403	0.887788		4.05723	1.50646	0.353266	0.560061		4.05723	0.658091	0.678235	0.799856		4.05723	-0.850201	0.676062	0.862903
NCU01012	0	5.36627	-0.653671	0.413946	0.530186		5.36627	-2.15231	0.0382422	0.0854888		5.36627	-2.57007	0.0310664	0.0738756		5.36627	-0.0465008	0.950201	0.977656		5.36627	-0.611701	0.382517	0.552913		5.36627	-0.664448	0.388003	0.685905
NCU01013	0	307.374	0.158457	0.820983	0.883589		307.374	-0.600309	0.392267	0.51696		307.374	0.256819	0.713801	0.797836		307.374	-0.789532	0.261066	0.462911		307.374	-0.609601	0.383614	0.553817		307.374	-1.41929	0.0436646	0.21049
NCU01014	0	7.3668	2.49256	0.00574686	0.0142085	up	7.3668	3.1939	0.000310066	0.00162458	up	7.3668	-0.657125	0.582752	0.689789		7.3668	-1.30546	0.328075	0.536033		7.3668	-3.54099	0.0322228	0.092144		7.3668	-2.63073	0.112557	0.363011
NCU01015	0	199.427	1.33836	4.24321e-06	2.52523e-05		199.427	0.781814	0.00776489	0.0237981		199.427	1.0029	0.00062624	0.0031045		199.427	0.0568671	0.85	0.922912		199.427	0.44172	0.127421	0.256088		199.427	-0.19728	0.510608	0.772352
NCU01016	0	152.77	-0.032482	0.871038	0.919536		152.77	0.0680484	0.730551	0.809799		152.77	0.0270876	0.892518	0.930413		152.77	-0.0128481	0.948837	0.97695		152.77	0.041249	0.825019	0.898625		152.77	-0.263898	0.184798	0.4713
NCU01017	0	70.2159	1.95136	9.34132e-13	2.02334e-11		70.2159	1.02488	0.000370855	0.0018937		70.2159	1.02907	0.00041195	0.00217462		70.2159	0.949103	0.00114931	0.00789913		70.2159	1.40394	1.39042e-07	2.79317e-06		70.2159	0.733175	0.0112344	0.0899188
NCU01019	0	628.908	0.651443	2.50967e-07	1.95201e-06		628.908	0.362409	0.00443096	0.0147983		628.908	0.374778	0.00343351	0.0125616		628.908	0.0119475	0.926745	0.966784		628.908	0.0813461	0.512222	0.666794		628.908	-0.0282244	0.825712	0.932132
NCU01021	0	1589.4	0.849638	0.000303333	0.00109966		1589.4	0.6859	0.00355543	0.0123386		1589.4	0.855065	0.000278669	0.0015511		1589.4	0.069762	0.767716	0.875793		1589.4	0.429309	0.067314	0.16128		1589.4	-0.129336	0.583652	0.814735
NCU01022	0	79.6415	1.53457	0.000214884	0.000816507		79.6415	1.19497	0.0041374	0.0140084		79.6415	0.798901	0.0584984	0.120951		79.6415	-0.694055	0.123816	0.279515		79.6415	-0.134894	0.747257	0.848255		79.6415	-0.237685	0.582223	0.814592
NCU01023	0	442.478	0.403915	0.198077	0.291645		442.478	0.743574	0.0173978	0.0456181		442.478	0.716905	0.0220532	0.0564847		442.478	0.347763	0.26824	0.470999		442.478	0.481385	0.121712	0.247769		442.478	-0.0530825	0.86591	0.94716
NCU01024	0	616.594	-0.715001	1.62314e-05	8.35367e-05		616.594	-0.425051	0.00948848	0.0279069		616.594	-0.535261	0.00120066	0.0053196		616.594	-0.389795	0.0175786	0.0678748		616.594	-0.335595	0.0357068	0.0998772		616.594	-0.00829252	0.958991	0.985528
NCU01025	0	13.1512	0.182955	0.863055	0.914057		13.1512	1.81372	0.0678482	0.135131		13.1512	1.63344	0.102813	0.187491		13.1512	1.47663	0.141389	0.306702		13.1512	1.20486	0.220743	0.380787		13.1512	1.39863	0.160828	0.43766
NCU01026	0	131.945	-0.200345	0.471974	0.587927		131.945	0.960953	0.000233038	0.00126892		131.945	0.775801	0.00337052	0.0123824		131.945	0.609443	0.0219282	0.0801624		131.945	0.498172	0.051793	0.132771		131.945	0.72987	0.00518073	0.0546694
NCU01027	0	2.24122	-0.0761058	0.954747	0.975097		2.24122	-1.14792	0.450966	0.574364		2.24122	-2.00041	0.271984	0.396578		2.24122	-0.448304	0.749146	1		2.24122	-0.318322	0.798061	0.879888		2.24122	0.567839	0.648149	1
NCU01032	0	105.403	0.000636923	0.998844	1		105.403	-0.201272	0.647954	0.743029		105.403	-0.0521621	0.905808	0.939722		105.403	-0.501177	0.260355	0.462247		105.403	-0.130822	0.762397	0.856713		105.403	-0.612303	0.166579	0.445291
NCU01033	0	8.70057	1.90518	0.00410589	0.0105913		8.70057	-1.82878	0.0777698	0.151012		8.70057	1.87205	0.00502673	0.0172415		8.70057	-3.3198	0.0338381	0.110158		8.70057	-1.09107	0.150632	0.288941		8.70057	-3.65938	0.0182371	0.124306
NCU01034	0	3.57291	-2.20156	0.0828286	0.140759		3.57291	-5.26485	0.00229651	0.00859234	down	3.57291	-2.09271	0.0979573	0.180535		3.57291	-2.12534	0.0917371	0.226606		3.57291	-1.76212	0.0973804	0.21076		3.57291	-1.74371	0.129073	0.39202
NCU01036	0	1499.25	-1.32861	2.64511e-11	4.34788e-10		1499.25	-1.71356	1.08837e-17	8.99078e-16		1499.25	-1.71894	1.01205e-17	8.41275e-16		1499.25	-1.28206	1.25251e-10	8.53381e-09		1499.25	-1.59799	6.76879e-16	6.23222e-14		1499.25	-0.965854	1.10046e-06	9.33554e-05
NCU01038	0	121.748	0.490832	0.48138	0.597315		121.748	-3.14724	3.33763e-05	0.000243009	down	121.748	1.03702	0.135951	0.231983		121.748	-1.80929	0.0120285	0.0506484		121.748	-0.936803	0.179667	0.327102		121.748	0.952558	0.170314	0.45082
NCU01039	0	285.782	-0.891807	0.00276706	0.00751609		285.782	1.58919	4.43391e-09	8.55705e-08		285.782	0.660307	0.017273	0.0464909		285.782	2.13765	2.04418e-15	3.21605e-13	up	285.782	2.18309	2.73677e-16	2.65828e-14	up	285.782	-0.197921	0.482767	0.751789
NCU01041	0	295.669	0.0746411	0.786449	0.857577		295.669	-0.068051	0.805193	0.865511		295.669	-0.139	0.61617	0.718513		295.669	-0.144408	0.602081	0.769429		295.669	-0.150472	0.57967	0.72338		295.669	0.243434	0.37312	0.674734
NCU01042	0	5.55606	7.25433	5.21275e-06	3.0275e-05	up	5.55606	1.44953	0.492998	0.611722		5.55606	5.03672	0.00212018	0.00852995	up	5.55606	0.0836688	0.968807	0.987625		5.55606	1.36871	0.463836	0.625359		5.55606	-0.249194	0.907284	0.965649
NCU01043	0	0.904366	5.62986	0.271458	0.378603		0.904366	0	1	1		0.904366	0	1	1		0.904366	0	1	1		0.904366	1.13509	0.829945	1		0.904366	0	1	1
NCU01044	0	305.534	-0.149483	0.574587	0.684434		305.534	0.0623528	0.813725	0.872137		305.534	-0.251361	0.347606	0.475839		305.534	0.319328	0.226074	0.421418		305.534	0.308784	0.234513	0.396644		305.534	-0.0160316	0.951544	0.982193
NCU01045	0	236.339	1.56177	1.34094e-05	7.04122e-05		236.339	1.02771	0.00433586	0.0145445		236.339	1.10202	0.00224041	0.00896061		236.339	-0.12185	0.740325	0.85987		236.339	-0.441599	0.22218	0.382443		236.339	-0.127265	0.727404	0.888438
NCU01047	0	468.73	-0.817914	0.12275	0.195369		468.73	-1.0474	0.0482652	0.102973		468.73	-0.999082	0.0596967	0.122969		468.73	-1.03939	0.0500962	0.146806		468.73	-1.03896	0.0493141	0.127826		468.73	-1.11374	0.0355893	0.186979
NCU01048	0	5.05041	-0.275173	0.748062	0.82827		5.05041	-3.16448	0.013099	0.0362157	down	5.05041	-4.01204	0.0132156	0.037404	down	5.05041	-5.50448	0.000750884	0.00562059	down	5.05041	-2.74667	0.00470747	0.0198751	down	5.05041	-0.98608	0.264883	0.565971
NCU01049	0	2.85878	2.50834	0.0531392	0.0965921		2.85878	1.99996	0.131507	0.226233		2.85878	1.63741	0.232744	0.351183		2.85878	0.26206	0.868408	1		2.85878	1.97696	0.118556	0.243564		2.85878	-1.06814	0.566504	1
NCU01050	0	3.41737	5.33915	0.00114192	0.00346298	up	3.41737	2.96058	0.0885493	0.167134		3.41737	2.37196	0.191503	0.302159		3.41737	1.73105	0.364346	0.570415		3.41737	2.94713	0.0782816	0.180097		3.41737	-1.0585	0.625089	0.838069
NCU01051	0	10.2557	-0.822054	0.293394	0.402327		10.2557	-0.85891	0.270432	0.390183		10.2557	-0.0674964	0.926495	0.95245		10.2557	0.331217	0.639538	0.793234		10.2557	-0.0485767	0.942794	0.967083		10.2557	-0.217285	0.762177	0.902636
NCU01052	0	13.716	0.145573	0.809307	0.875151		13.716	-0.621376	0.336233	0.460586		13.716	0.0961372	0.874803	0.918406		13.716	-0.0264003	0.965695	0.985861		13.716	-0.262402	0.646664	0.775947		13.716	0.262259	0.653865	0.853561
NCU01053	0	170	0.455127	0.0859372	0.145219		170	0.277482	0.297322	0.418144		170	0.541268	0.041112	0.0917186		170	0.89675	0.000595494	0.0046674		170	0.852156	0.000814422	0.00466236		170	0.646135	0.0131351	0.0990976
NCU01054	0	3.78241	4.23038	0.000116484	0.000477505	up	3.78241	2.47233	0.0358062	0.0810683		3.78241	1.63003	0.204382	0.31822		3.78241	1.16562	0.387861	0.59223		3.78241	0.704386	0.569734	0.715338		3.78241	0.257104	0.861256	0.944901
NCU01055	0	23.8753	1.88254	9.05639e-05	0.000384866		23.8753	1.95913	4.04396e-05	0.000286874		23.8753	1.89155	8.97336e-05	0.000592792		23.8753	1.16559	0.0212285	0.0784768		23.8753	1.37425	0.00321316	0.0145224		23.8753	-0.471389	0.422756	0.71091
NCU01056	0	50.585	1.17698	0.204834	0.299638		50.585	-0.475867	0.612581	0.713293		50.585	-2.67656	0.00787343	0.0247487	down	50.585	-0.918881	0.33209	0.539741		50.585	-0.483553	0.603296	0.74135		50.585	-0.311504	0.739172	0.892058
NCU01057	0	58.4763	1.38915	0.0089427	0.0208866		58.4763	-0.351972	0.523922	0.638928		58.4763	0.586993	0.27665	0.401522		58.4763	-1.84979	0.00241034	0.0144737		58.4763	-2.59446	9.60463e-06	0.000109518	down	58.4763	0.998685	0.0604823	0.253686
NCU01058	0	21.0809	0.782435	0.0883306	0.148608		21.0809	0.16727	0.730223	0.809639		21.0809	-0.0307555	0.951616	0.969271		21.0809	1.25111	0.00479071	0.0250326		21.0809	0.565589	0.187931	0.337244		21.0809	0.824335	0.0648885	0.265978
NCU01059	0	95.211	0.162418	0.63248	0.735208		95.211	0.188858	0.576701	0.6849		95.211	-0.187114	0.589362	0.695656		95.211	0.464209	0.16722	0.343858		95.211	0.213098	0.515509	0.669594		95.211	-0.026104	0.938453	0.977594
NCU01060	0	600.189	-1.51375	2.29376e-08	2.17204e-07		600.189	-1.39211	2.50686e-07	3.37898e-06		600.189	-1.13931	2.35938e-05	0.000187205		600.189	-0.0264723	0.920709	0.964282		600.189	-0.649768	0.0142017	0.047621		600.189	-1.47972	3.90393e-08	4.98155e-06
NCU01061	0	41.0355	-1.05071	0.0276039	0.0551905		41.0355	-2.58606	1.60529e-06	1.72617e-05	down	41.0355	-0.981416	0.0397914	0.0894496		41.0355	-2.97142	2.31129e-07	6.66654e-06	down	41.0355	-2.24912	2.43342e-06	3.31929e-05	down	41.0355	-0.525751	0.25336	0.551153
NCU01063	0	1267.25	-5.14387	2.41049e-18	1.19688e-16	down	1267.25	-5.10207	4.11908e-18	3.6048e-16	down	1267.25	-4.72556	8.09343e-16	4.9679e-14	down	1267.25	-3.15038	6.08819e-08	2.15906e-06	down	1267.25	-4.66891	1.06627e-15	9.33144e-14	down	1267.25	-2.95912	3.50676e-07	3.48782e-05	down
NCU01064	0	79.5852	3.63756	1.37376e-06	8.99231e-06	up	79.5852	4.09433	4.92827e-08	7.72358e-07	up	79.5852	4.58936	9.15166e-10	2.18626e-08	up	79.5852	2.96579	9.24498e-05	0.00103489	up	79.5852	3.45861	3.88361e-06	5.02594e-05	up	79.5852	-1.44424	0.129056	0.39202
NCU01065	0	388.733	1.28699	0.0117282	0.0263519		388.733	0.779772	0.127208	0.220252		388.733	-0.340573	0.507933	0.625208		388.733	0.0815316	0.873698	0.936581		388.733	-0.0657928	0.897526	0.941066		388.733	-1.04051	0.0436328	0.210454
NCU01066	0	3936.43	6.53338	1.26877e-20	8.38528e-19	up	3936.43	7.5182	8.60199e-27	2.00087e-24	up	3936.43	5.71777	3.7374e-16	2.48382e-14	up	3936.43	5.70762	4.20788e-16	7.13937e-14	up	3936.43	6.90754	7.16501e-23	1.91914e-20	up	3936.43	-1.27923	0.0802422	0.301252
NCU01067	0	245.207	0.17619	0.575008	0.68468		245.207	-0.0231431	0.94142	0.962101		245.207	-0.136402	0.666525	0.759987		245.207	-0.33869	0.286165	0.489972		245.207	-0.284563	0.360704	0.53067		245.207	-0.236658	0.45221	0.734707
NCU01068	0	715.747	-3.49355	2.75582e-26	3.18181e-24	down	715.747	-3.14866	4.88487e-22	6.85355e-20	down	715.747	-2.91467	3.62853e-19	3.56362e-17	down	715.747	-2.12761	3.79686e-11	2.88195e-09	down	715.747	-2.4864	7.17881e-15	5.56609e-13	down	715.747	-1.66373	1.94374e-07	2.00229e-05
NCU01069	0	659.584	-0.376937	0.295903	0.405034		659.584	-0.625006	0.0833786	0.159417		659.584	-0.735099	0.0420585	0.0932885		659.584	-0.575199	0.11116	0.258844		659.584	-0.637054	0.0762359	0.176771		659.584	-0.826038	0.0220923	0.13967
NCU01070	0	121.576	-1.91849	3.20266e-06	1.95484e-05		121.576	-1.57869	9.93263e-05	0.000616968		121.576	-1.09195	0.00653972	0.0212595		121.576	-1.55101	0.000136133	0.00140568		121.576	-1.31494	0.000829225	0.00472263		121.576	-2.5757	7.85724e-10	1.51086e-07	down
NCU01071	0	2.1514	2.20471	0.439986	0.556325		2.1514	-3.43774	0.27971	0.400058		2.1514	-3.2827	0.301969	0.428772		2.1514	-1.90206	0.549505	1		2.1514	-3.04089	0.335462	0.505653		2.1514	-3.67065	0.248415	1
NCU01072	0	134.937	-2.83617	3.45042e-07	2.59133e-06	down	134.937	-2.083	0.000112789	0.000683305	down	134.937	-0.970594	0.0662315	0.133719		134.937	-0.431279	0.410826	0.611797		134.937	-0.98848	0.0580265	0.144453		134.937	-0.600254	0.25159	0.550259
NCU01073	0	42.7475	0.00055738	0.998815	1		42.7475	0.3662	0.313434	0.435206		42.7475	-0.139323	0.715796	0.799258		42.7475	0.635921	0.0768164	0.200269		42.7475	-0.0101283	0.976855	0.986679		42.7475	-0.41774	0.270234	0.57228
NCU01074	0	28.825	-1.49002	0.0948826	0.158132		28.825	-1.79536	0.0461302	0.0992805		28.825	-1.78548	0.0487148	0.104563		28.825	-0.619271	0.477387	0.670154		28.825	-0.935165	0.276479	0.444378		28.825	-0.196107	0.819799	0.929507
NCU01075	0	0.557805	0.720586	0.850927	0.90625		0.557805	-1.79413	0.651142	1		0.557805	-1.63909	0.679532	1		0.557805	0.72486	0.850147	1		0.557805	-1.38061	0.72657	1		0.557805	-2.02704	0.609437	1
NCU01076	0	3.27564	4.99175	0.000566194	0.00189119	up	3.27564	3.94094	0.00756599	0.023245	up	3.27564	-1.02594	0.612194	0.715049		3.27564	0.366161	0.856034	0.926371		3.27564	-0.88018	0.660341	0.785909		3.27564	-1.41389	0.484776	0.753404
NCU01077	0	55.8501	1.38058	0.00203962	0.00575531		55.8501	-0.0253988	0.957206	0.97274		55.8501	0.771346	0.0922766	0.172914		55.8501	1.41314	0.00159105	0.0103126		55.8501	1.45391	0.000886472	0.00497219		55.8501	-0.64647	0.183363	0.469384
NCU01078	0	103.339	-0.369146	0.405259	0.522129		103.339	-0.283325	0.520691	0.636017		103.339	-0.144683	0.743036	0.821578		103.339	1.6476	0.000107063	0.00116677		103.339	0.7749	0.0675847	0.161804		103.339	-0.55123	0.211963	0.503463
NCU01079	0	1.43251	3.1024	0.104908	0.171998		1.43251	-0.591956	0.800672	1		1.43251	-1.85419	0.432073	1		1.43251	-1.90928	0.41852	1		1.43251	0.367528	0.854018	1		1.43251	-2.24215	0.342097	1
NCU01080	0	1262.01	-2.45783	0.0021266	0.00596931	down	1262.01	-2.40489	0.00264518	0.00972983	down	1262.01	-2.12304	0.00794803	0.02493	down	1262.01	-2.34339	0.00339802	0.0190267	down	1262.01	-2.30586	0.00391225	0.017136	down	1262.01	-3.09177	0.000112233	0.00390021	down
NCU01081	0	91.1885	-0.0646925	0.828519	0.889801		91.1885	-0.543961	0.0753792	0.147052		91.1885	-0.955986	0.00276844	0.0106116		91.1885	-0.0816086	0.785167	0.88568		91.1885	-0.121421	0.671471	0.794742		91.1885	-0.289633	0.330272	0.636633
NCU01082	0	62.8369	1.64216	2.16208e-05	0.000107913		62.8369	0.739445	0.0620076	0.12565		62.8369	0.742437	0.0624965	0.127577		62.8369	-0.732707	0.0933141	0.229584		62.8369	0.262614	0.498899	0.654851		62.8369	-0.276112	0.502151	0.766641
NCU01083	0	401.808	2.18482	2.4551e-07	1.92028e-06	up	401.808	1.64547	0.000104343	0.000638701		401.808	1.84234	1.3905e-05	0.000117952		401.808	0.498602	0.243637	0.442974		401.808	0.938076	0.0267208	0.0793635		401.808	-0.415494	0.334704	0.639761
NCU01084	0	120.778	1.01772	0.000105656	0.000439835		120.778	0.809827	0.00215659	0.00818468		120.778	0.357401	0.189248	0.299296		120.778	0.492565	0.0673704	0.182117		120.778	0.537142	0.0363991	0.101417		120.778	0.273596	0.306769	0.611206
NCU01085	0	265.809	-0.143998	0.689921	0.781595		265.809	-0.216977	0.547766	0.659543		265.809	-0.0911243	0.800763	0.86464		265.809	-0.13611	0.706172	0.841667		265.809	-0.0285025	0.936303	0.963556		265.809	-0.464299	0.198417	0.487066
NCU01086	0	35.7381	0.798764	0.130621	0.205879		35.7381	-0.33499	0.543922	0.656555		35.7381	0.00331292	0.995164	0.997308		35.7381	0.31442	0.55874	0.737683		35.7381	0.0369099	0.943705	0.967906		35.7381	-0.473997	0.388053	0.685905
NCU01087	0	1.91452	3.48731	0.0504542	0.0923067		1.91452	-1.92018	0.396081	0.520666		1.91452	-1.76514	0.435321	0.559149		1.91452	1.94026	0.296609	1		1.91452	-1.62615	0.468896	0.629779		1.91452	-0.682671	0.760887	1
NCU01088	0	203.269	-0.988912	0.0497259	0.0912264		203.269	-0.510466	0.308283	0.429797		203.269	-1.17015	0.0207016	0.0537548		203.269	-0.514134	0.305254	0.511694		203.269	-0.10068	0.839416	0.907205		203.269	-1.49167	0.00315829	0.0398959
NCU01089	0	341.809	-2.88787	1.04504e-14	3.18937e-13	down	341.809	-2.32404	2.15539e-10	5.47458e-09	down	341.809	-1.54923	1.79222e-05	0.000147557		341.809	-0.416132	0.242578	0.441714		341.809	-1.08878	0.00215264	0.0105007		341.809	-1.64398	4.81913e-06	0.000323256
NCU01090	0	2.56049	5.39808	0.0303453	0.0598107		2.56049	0.493622	0.862733	0.908687		2.56049	0.662417	0.816873	0.877		2.56049	-0.818955	0.775158	1		2.56049	-0.631557	0.824885	0.898625		2.56049	-1.15182	0.687882	1
NCU01091	0	9.69722	7.5812	5.52466e-10	7.2031e-09	up	9.69722	2.29591	0.119593	0.210281		9.69722	2.45918	0.0952198	0.176743		9.69722	0.830081	0.658868	0.807419		9.69722	1.1714	0.427164	0.593764		9.69722	-0.947655	0.615286	0.831497
NCU01092	0	194.057	-1.39962	0.0578311	0.103801		194.057	-2.54079	0.000647976	0.00304005	down	194.057	-1.90625	0.010105	0.0301648		194.057	-1.63086	0.0273432	0.093666		194.057	-2.87853	9.86718e-05	0.000793594	down	194.057	-0.183705	0.802261	0.923662
NCU01093	0	1.67005	0.571563	0.848884	0.904476		1.67005	-3.94337	0.230591	1		1.67005	-2.36395	0.471598	1		1.67005	-3.84342	0.242624	1		1.67005	-5.06671	0.123475	1		1.67005	-2.67736	0.413388	1
NCU01094	0	21.3073	-0.21829	0.820683	0.883465		21.3073	-1.21671	0.219582	0.333948		21.3073	-1.2588	0.207857	0.322381		21.3073	-0.132977	0.890038	0.946363		21.3073	-0.159668	0.86578	0.922893		21.3073	0.0922425	0.922819	0.971995
NCU01095	0	29.0903	3.75193	7.71452e-13	1.71527e-11	up	29.0903	0.873275	0.156527	0.2588		29.0903	3.84842	1.94622e-13	8.55855e-12	up	29.0903	1.86197	0.00105461	0.00737715		29.0903	1.71879	0.00136342	0.00718623		29.0903	1.02911	0.0822785	0.305396
NCU01096	0	0.605972	1.8687	0.45548	0.571841		0.605972	2.351	0.334722	1		0.605972	-0.490404	0.856072	1		0.605972	0.908026	0.736531	1		0.605972	-1.76879	0.512989	1		0.605972	0.543047	0.840248	1
NCU01097	0	780.569	0.401999	0.290284	0.399339		780.569	-0.401577	0.292443	0.413056		780.569	0.237805	0.531994	0.646274		780.569	-0.261825	0.492346	0.683979		780.569	-0.277467	0.464762	0.626129		780.569	1.10964	0.00342663	0.0417302
NCU01098	0	95.5634	1.49434	7.73732e-07	5.40035e-06		95.5634	1.30896	1.60431e-05	0.000128447		95.5634	0.169559	0.59875	0.702958		95.5634	0.40265	0.203425	0.394495		95.5634	0.465192	0.122313	0.248877		95.5634	-0.26924	0.405043	0.697287
NCU01099	0	0.388453	-2.12313	0.685334	0.778423		0.388453	-2.19376	0.675481	1		0.388453	-2.03872	0.697238	1		0.388453	-2.09381	0.689477	1		0.388453	-3.31709	0.526731	1		0.388453	-0.0736477	0.988583	1
NCU01100	0	736.845	0.25066	0.107124	0.175094		736.845	0.387534	0.0122936	0.034398		736.845	0.340988	0.0283625	0.0686462		736.845	0.147122	0.34603	0.55315		736.845	0.480949	0.00153848	0.00793387		736.845	0.248658	0.10743	0.352919
NCU01101	0	306.205	0.265099	0.251251	0.354691		306.205	-0.324517	0.166766	0.271621		306.205	0.0377241	0.871426	0.916531		306.205	0.0956793	0.68042	0.823336		306.205	0.221402	0.328092	0.498026		306.205	0.267271	0.244085	0.541
NCU01102	0	719.203	1.61944	3.57911e-05	0.000169292		719.203	1.18198	0.00258221	0.00953789		719.203	1.14116	0.00364201	0.0131879		719.203	0.677498	0.0848255	0.214966		719.203	0.902167	0.0211819	0.0653495		719.203	-0.107527	0.784983	0.915885
NCU01103	0	10.6099	1.91653	0.0056347	0.0139672		10.6099	1.52129	0.033154	0.0761361		10.6099	3.71422	3.37391e-09	7.30931e-08	up	10.6099	1.30485	0.0777972	0.202217		10.6099	1.70623	0.00840659	0.0317004		10.6099	0.310476	0.701836	0.877775
NCU01104	0	191.043	0.0804681	0.902848	0.939557		191.043	-0.467888	0.478836	0.599566		191.043	-0.288575	0.662227	0.757137		191.043	-1.07428	0.105647	0.25025		191.043	-1.0066	0.126629	0.254902		191.043	-1.96179	0.00330934	0.0409092
NCU01105	0	21.1336	-0.570838	0.309473	0.419712		21.1336	-0.256094	0.639897	0.737232		21.1336	-1.84646	0.00446402	0.0155835		21.1336	-0.19595	0.72097	0.849529		21.1336	-0.9084	0.0889291	0.198196		21.1336	-0.970512	0.0863107	0.313107
NCU01106	0	84.7977	-3.04459	8.17583e-05	0.000351498	down	84.7977	-3.89098	1.00131e-06	1.14201e-05	down	84.7977	-3.46149	1.06569e-05	9.27132e-05	down	84.7977	-1.67655	0.0260311	0.0905268		84.7977	-2.6036	0.000525517	0.00323471	down	84.7977	-2.0368	0.00687128	0.0656986
NCU01107	0	1907.89	-2.64504	6.85087e-06	3.87785e-05	down	1907.89	-0.950597	0.104888	0.190372		1907.89	-1.54454	0.00847565	0.0262864		1907.89	-0.271983	0.642526	0.795013		1907.89	-0.604562	0.301997	0.47195		1907.89	-0.13712	0.814933	0.928089
NCU01108	0	85.7956	-1.2842	0.0634084	0.111946		85.7956	0.007089	0.99165	0.995706		85.7956	-0.252647	0.710423	0.79532		85.7956	0.488432	0.469448	0.662177		85.7956	-0.359225	0.593827	0.734007		85.7956	-1.7611	0.0112541	0.0899188
NCU01109	0	8.83761	0.671006	0.480504	0.596614		8.83761	-4.26943	0.011178	0.0319025	down	8.83761	0.0253023	0.979311	0.987877		8.83761	-2.16284	0.0632086	0.174027		8.83761	-2.07437	0.0423075	0.113855		8.83761	-0.193609	0.841627	0.937723
NCU01111	0	18.496	-1.39339	0.135519	0.212133		18.496	-0.595005	0.501727	0.619294		18.496	-1.58926	0.0961911	0.178097		18.496	1.44679	0.0851665	0.215355		18.496	0.0862472	0.918427	0.952341		18.496	-0.190635	0.8254	0.932132
NCU01112	0	103.63	-2.36065	0.0260386	0.0526431		103.63	-0.31811	0.756308	0.828214		103.63	-1.53545	0.140679	0.238074		103.63	2.55739	0.0118057	0.0499047	up	103.63	0.347082	0.732961	0.837481		103.63	0.0297451	0.976768	0.993065
NCU01113	0	5.63006	1.78283	0.0494657	0.0908102		5.63006	0.359874	0.716466	0.799681		5.63006	0.292516	0.772636	0.843336		5.63006	0.777029	0.420471	0.61936		5.63006	0.0973621	0.916632	0.951611		5.63006	0.0970254	0.922208	0.971614
NCU01114	0	87.8127	1.74851	2.01781e-12	4.14061e-11		87.8127	1.22101	1.64798e-06	1.76564e-05		87.8127	1.09245	2.56812e-05	0.000201059		87.8127	0.718595	0.00692095	0.0334337		87.8127	0.814407	0.00092489	0.00514481		87.8127	0.260749	0.332432	0.637672
NCU01115	0	190.83	2.27736	0.000121172	0.000493496	up	190.83	0.815677	0.170829	0.276347		190.83	0.796802	0.181401	0.289684		190.83	-0.55317	0.359971	0.56551		190.83	-0.353746	0.552655	0.700662		190.83	-0.993111	0.100888	0.340213
NCU01116	0	221.238	-0.163567	0.600508	0.708354		221.238	-0.107107	0.730997	0.809888		221.238	-0.0648447	0.835487	0.89041		221.238	-0.228277	0.4658	0.658208		221.238	-0.247346	0.420508	0.587926		221.238	-0.62398	0.046535	0.218011
NCU01118	0	379.658	0.649845	0.14113	0.219411		379.658	0.699039	0.113147	0.201756		379.658	0.259164	0.558789	0.669623		379.658	1.55135	0.000417252	0.00352242		379.658	1.61345	0.000231439	0.00164181		379.658	0.199972	0.651008	0.85222
NCU01119	0	447.673	-0.417893	0.12813	0.202668		447.673	-0.108939	0.689633	0.777112		447.673	0.12172	0.655053	0.751417		447.673	0.63145	0.019582	0.073767		447.673	0.456872	0.0887403	0.197875		447.673	0.168814	0.533184	0.787434
NCU01120	0	3.81067	1.43504	0.150432	0.231173		3.81067	1.31028	0.190818	0.300109		3.81067	-1.96139	0.244856	0.365402		3.81067	-1.00268	0.460232	0.653601		3.81067	-0.436792	0.678216	0.799856		3.81067	1.55065	0.111388	0.360179
NCU01121	0	146.666	1.85881	3.43068e-06	2.08209e-05		146.666	1.13815	0.00480428	0.0158689		146.666	1.46096	0.000284818	0.0015764		146.666	0.5127	0.210451	0.403334		146.666	0.869678	0.0295201	0.0861719		146.666	-0.677628	0.10759	0.352951
NCU01122	0	300.917	-0.333687	0.260166	0.365246		300.917	-0.217034	0.462093	0.584409		300.917	0.350584	0.231256	0.349593		300.917	0.292315	0.318216	0.525582		300.917	0.0897454	0.756474	0.85352		300.917	0.400462	0.168873	0.448282
NCU01123	0	14.4618	-1.648	0.286507	0.394936		14.4618	-6.81544	0.00102298	0.00440191	down	14.4618	-1.14016	0.456906	0.577849		14.4618	-1.16087	0.44848	0.644206		14.4618	0.130293	0.930728	0.959847		14.4618	-2.35256	0.132368	0.396521
NCU01124	0	339.47	-3.92529	4.34742e-09	4.6916e-08	down	339.47	-2.83317	1.67864e-05	0.000133191	down	339.47	-2.61973	6.8406e-05	0.000467988	down	339.47	-1.21269	0.0631897	0.174027		339.47	-1.79835	0.00578827	0.0235663		339.47	-2.35157	0.000330193	0.00868439	down
NCU01127	0	140.537	-3.8707	7.79901e-15	2.4187e-13	down	140.537	-2.33164	3.17409e-07	4.14414e-06	down	140.537	-2.30584	4.78989e-07	6.03964e-06	down	140.537	-1.88174	3.05521e-05	0.000418303		140.537	-1.83712	3.14062e-05	0.00030372		140.537	-1.44816	0.00111576	0.0203257
NCU01132	0	16.8595	0.422659	0.653838	0.754084		16.8595	-1.33174	0.184085	0.292701		16.8595	-2.00818	0.0596484	0.122898		16.8595	-0.469049	0.627688	0.786532		16.8595	-0.927637	0.326689	0.497051		16.8595	0.871951	0.349022	0.65271
NCU01134	0	1.03425	3.39179	0.504658	0.618828		1.03425	-0.0401891	0.993903	1		1.03425	-1.28974	0.806488	1		1.03425	-1.34483	0.798397	1		1.03425	-2.56811	0.625722	1		1.03425	-1.67769	0.749999	1
NCU01135	0	74.1383	-1.14247	0.00414733	0.0106838		74.1383	-0.874531	0.024731	0.0605364		74.1383	-0.969381	0.0143542	0.0401129		74.1383	0.601488	0.1015	0.243561		74.1383	-0.102997	0.776608	0.866613		74.1383	-0.171701	0.64473	0.848609
NCU01136	0	233.648	0.159063	0.689192	0.780953		233.648	-1.03873	0.0100333	0.0291532		233.648	-1.45599	0.000364615	0.00195323		233.648	-1.02097	0.0115028	0.0490673		233.648	-1.05892	0.00776965	0.0299111		233.648	0.0177954	0.964264	0.988365
NCU01138	0	42.65	-1.57579	0.0329923	0.0642221		42.65	-1.19915	0.0981798	0.18102		42.65	-1.41595	0.0545029	0.114322		42.65	-1.2476	0.0871023	0.218843		42.65	-1.764	0.013295	0.0453658		42.65	1.41258	0.0408477	0.202785
NCU01140	0	838.435	-2.88434	4.95676e-06	2.89991e-05	down	838.435	-1.02501	0.102013	0.186467		838.435	-1.502	0.0167319	0.045366		838.435	-1.30849	0.037007	0.117772		838.435	-1.6396	0.00885201	0.0329167		838.435	0.803893	0.198761	0.4871
NCU01141	0	162.69	1.49868	1.20458e-06	8.01076e-06		162.69	1.06819	0.00059398	0.0028242		162.69	1.24811	5.93362e-05	0.000413296		162.69	0.956132	0.00222679	0.0135693		162.69	0.768981	0.0120959	0.0420763		162.69	-0.390856	0.228687	0.522078
NCU01142	0	1311.71	-0.693423	1.98717e-07	1.58296e-06		1311.71	0.143224	0.271523	0.391516		1311.71	0.143953	0.270536	0.394859		1311.71	0.29379	0.0239565	0.0855532		1311.71	0.286598	0.0253209	0.0758682		1311.71	0.109021	0.400916	0.694596
NCU01143	0	387.896	0.601886	0.000321007	0.00115473		387.896	0.323037	0.0552745	0.114393		387.896	0.372067	0.0278893	0.0678167		387.896	0.0470748	0.783332	0.884994		387.896	0.10963	0.504429	0.659563		387.896	0.030324	0.857524	0.942713
NCU01144	0	92.5827	-0.762382	0.0679322	0.1186		92.5827	-0.48321	0.239795	0.357255		92.5827	-0.324927	0.429156	0.55352		92.5827	0.505721	0.205757	0.39777		92.5827	0.0993526	0.800832	0.882173		92.5827	0.704084	0.0750509	0.288883
NCU01145	0	678.344	0.581075	0.0293933	0.0582096		678.344	0.419992	0.115665	0.205088		678.344	0.151021	0.573051	0.681814		678.344	0.114187	0.669965	0.814443		678.344	0.206739	0.436263	0.602238		678.344	-0.312732	0.243587	0.540313
NCU01146	0	1877.11	-0.165681	0.251352	0.354691		1877.11	0.0586579	0.683548	0.772718		1877.11	0.120246	0.403875	0.530596		1877.11	0.354014	0.013684	0.0561438		1877.11	0.296374	0.0374451	0.103635		1877.11	-0.270587	0.0603465	0.253451
NCU01147	0	213.701	1.66238	0.00148803	0.0043528		213.701	1.38223	0.00833773	0.0252301		213.701	1.82192	0.000495119	0.00253702		213.701	1.56851	0.002741	0.0160799		213.701	1.60326	0.00208323	0.0102128		213.701	0.0677715	0.898172	0.962224
NCU01148	0	35.454	0.407492	0.275432	0.382697		35.454	0.641363	0.0781751	0.151733		35.454	0.761415	0.0370229	0.0848666		35.454	0.325866	0.388081	0.592356		35.454	0.306142	0.376803	0.548042		35.454	0.31374	0.392467	0.68899
NCU01149	0	71.3059	-0.601915	0.0427134	0.0801964		71.3059	-0.239226	0.403122	0.528037		71.3059	-0.235891	0.41534	0.540478		71.3059	-0.301858	0.297686	0.504086		71.3059	-0.448043	0.098036	0.211558		71.3059	-0.105864	0.704259	0.878626
NCU01150	0	417.318	-0.0448598	0.763776	0.841295		417.318	-0.198715	0.185149	0.293865		417.318	0.327398	0.0261218	0.0644586		417.318	0.130861	0.377091	0.582673		417.318	0.122163	0.39002	0.55964		417.318	-0.189891	0.199721	0.488327
NCU01151	0	5.76023	1.90106	0.00702451	0.016922		5.76023	0.224568	0.784665	0.850792		5.76023	0.723848	0.35764	0.48529		5.76023	0.159519	0.849609	0.922765		5.76023	-0.283958	0.710095	0.823908		5.76023	-0.382882	0.659275	0.855371
NCU01153	0	0.615	0.366597	0.928131	0.956889		0.615	0.332367	0.934717	1		0.615	-1.04519	0.797614	1		0.615	1.34259	0.733681	1		0.615	1.24862	0.747225	1		0.615	-1.43314	0.725123	1
NCU01154	0	844.255	-1.23356	0.0280072	0.055799		844.255	-1.56903	0.00522799	0.0170454		844.255	-0.910007	0.104851	0.1905		844.255	-0.493538	0.378687	0.5842		844.255	-1.12665	0.0443175	0.11831		844.255	-1.39572	0.0128883	0.0979125
NCU01156	0	77.5331	0.213388	0.572869	0.683044		77.5331	0.433121	0.24671	0.364381		77.5331	-0.109863	0.776245	0.846334		77.5331	0.869099	0.018674	0.0711904		77.5331	0.37181	0.305609	0.475436		77.5331	0.625073	0.0898787	0.319419
NCU01157	0	440.139	0.811078	0.187829	0.279022		440.139	0.193524	0.753593	0.826417		440.139	0.305314	0.620466	0.721619		440.139	-0.347937	0.573218	0.748349		440.139	-0.552043	0.370178	0.541274		440.139	-1.3655	0.0275425	0.161246
NCU01158	0	168.297	0.0420392	0.937434	0.962589		168.297	-0.38765	0.470358	0.591393		168.297	-1.23675	0.022838	0.0580741		168.297	-1.40702	0.00975056	0.0434657		168.297	-1.24758	0.0199165	0.0623598		168.297	-1.16138	0.0314614	0.174287
NCU01159	0	1.63136	0.537274	0.691449	0.782955		1.63136	0.0733862	0.958569	1		1.63136	-1.38681	0.448626	1		1.63136	-0.422794	0.782479	1		1.63136	0.434772	0.727507	1		1.63136	-1.77809	0.330114	1
NCU01160	0	1375.31	0.290407	0.166128	0.251541		1375.31	0.416208	0.0469073	0.100659		1375.31	0.147869	0.481509	0.601095		1375.31	0.155072	0.460187	0.653601		1375.31	0.212695	0.307841	0.477926		1375.31	-0.157472	0.453212	0.734707
NCU01161	0	433.329	-0.428328	0.0018465	0.00527116		433.329	-0.376383	0.00582099	0.018669		433.329	-0.497182	0.000348963	0.00187964		433.329	-0.221909	0.102758	0.24583		433.329	-0.195759	0.128998	0.258317		433.329	0.0014687	0.991133	0.997806
NCU01162	0	199.181	-2.62274	0.000117454	0.000480803	down	199.181	-2.20648	0.00110693	0.00470627	down	199.181	-2.52569	0.000207563	0.00121543	down	199.181	-0.956705	0.153392	0.32484		199.181	-1.41145	0.0346032	0.0974068		199.181	-0.543082	0.416243	0.706029
NCU01163	0	184.148	1.49176	0.000442026	0.00153476		184.148	1.65142	9.75547e-05	0.000608529		184.148	0.845337	0.0482334	0.103815		184.148	0.271858	0.528771	0.712244		184.148	0.619998	0.143236	0.278241		184.148	-0.180689	0.676225	0.862907
NCU01164	0	870.976	-0.166664	0.129054	0.203811		870.976	0.180188	0.0947498	0.176314		870.976	0.0785313	0.47115	0.591356		870.976	-0.274004	0.0132061	0.0545194		870.976	-0.184828	0.0794639	0.182295		870.976	0.0529023	0.622362	0.836357
NCU01165	0	1238.39	-1.43674	4.69335e-13	1.08902e-11		1238.39	-1.42914	5.87216e-13	2.38092e-11		1238.39	-1.34381	1.31575e-11	4.15355e-10		1238.39	-1.24955	2.87371e-10	1.78893e-08		1238.39	-1.38347	1.75299e-12	9.6842e-11		1238.39	-0.764449	0.000100326	0.00361718
NCU01166	0	1050.77	-0.621799	2.65032e-08	2.48513e-07		1050.77	-0.153124	0.16133	0.265055		1050.77	-0.128323	0.242663	0.362804		1050.77	-0.278518	0.0115169	0.0490673		1050.77	-0.280271	0.00853122	0.032061		1050.77	-0.132287	0.222463	0.516217
NCU01167	0	76.0423	-0.670428	0.151243	0.232232		76.0423	0.496625	0.26868	0.388303		76.0423	0.186902	0.680654	0.771024		76.0423	0.279992	0.535873	0.718678		76.0423	0.112495	0.799748	0.881088		76.0423	-0.559549	0.223188	0.517344
NCU01169	0	1491.64	-0.021722	0.954655	0.975097		1491.64	-0.0236704	0.950586	0.967999		1491.64	0.449395	0.239061	0.358754		1491.64	0.304205	0.42555	0.624327		1491.64	0.349761	0.358794	0.528831		1491.64	-0.145511	0.703161	0.878494
NCU01170	0	1494.36	0.174754	0.417787	0.53439		1494.36	0.000109882	0.999594	1		1494.36	0.208775	0.333196	0.461256		1494.36	0.133872	0.534971	0.717913		1494.36	0.101776	0.635327	0.766538		1494.36	0.0256394	0.905284	0.964745
NCU01171	0	120.955	1.36955	1.25446e-11	2.17781e-10		120.955	0.913057	1.01603e-05	8.70254e-05		120.955	0.873598	3.08963e-05	0.000236368		120.955	0.0800697	0.720726	0.84942		120.955	0.365603	0.067962	0.1624		120.955	-0.269901	0.229063	0.522078
NCU01172	0	392.451	0.0446781	0.769361	0.844632		392.451	0.133663	0.376704	0.502356		392.451	-0.0182715	0.905301	0.939314		392.451	-0.0269668	0.860262	0.929087		392.451	-0.00437925	0.976083	0.986123		392.451	0.181802	0.223582	0.517981
NCU01173	0	2.5502	1.47884	0.227123	0.326266		2.5502	0.900241	0.479946	0.600544		2.5502	0.365857	0.789676	0.85612		2.5502	1.48714	0.225177	1		2.5502	-0.00311827	0.998011	0.999364		2.5502	-0.677301	0.653082	1
NCU01174	0	218.543	-0.247868	0.32552	0.437267		218.543	0.00577213	0.981513	0.989461		218.543	-0.353187	0.164715	0.269016		218.543	-0.00497589	0.984122	0.991725		218.543	0.249173	0.302293	0.472219		218.543	0.49857	0.0412234	0.203832
NCU01175	0	2472.52	0.304379	0.102494	0.168647		2472.52	0.690226	0.000206165	0.00114251		2472.52	0.395683	0.0337719	0.0790791		2472.52	0.795741	1.87826e-05	0.000276405		2472.52	0.705248	0.000141737	0.00107078		2472.52	0.191229	0.304444	0.608743
NCU01176	0	301.947	-0.83603	0.00905512	0.0210978		301.947	-0.514036	0.106344	0.192381		301.947	-0.63871	0.0457235	0.0997409		301.947	-0.808164	0.0116368	0.0493639		301.947	-0.942427	0.00284547	0.0132096		301.947	-1.30092	5.15278e-05	0.00218564
NCU01177	0	289.372	1.22507	8.46132e-06	4.67887e-05		289.372	1.28966	2.63426e-06	2.64593e-05		289.372	0.95883	0.00053324	0.00271817		289.372	0.856273	0.00200093	0.0124831		289.372	1.16316	1.85157e-05	0.00019391		289.372	0.212452	0.446547	0.730153
NCU01178	0	635.44	-0.76904	0.0317224	0.0621159		635.44	-1.1216	0.00177163	0.00693972		635.44	-0.913553	0.0108546	0.0319353		635.44	-0.953958	0.00780625	0.0368106		635.44	-0.824287	0.0206553	0.0641053		635.44	-0.483505	0.175503	0.458657
NCU01179	0	1234.69	1.24265	0.00588079	0.0145022		1234.69	0.99659	0.027211	0.0651104		1234.69	0.867138	0.0547514	0.114728		1234.69	0.232333	0.607194	0.773337		1234.69	0.645191	0.152469	0.291543		1234.69	-0.810901	0.0733822	0.284487
NCU01180	0	400.504	-2.42536	2.663e-22	2.05802e-20	down	400.504	-1.78171	1.99982e-13	8.75069e-12		400.504	-1.8095	1.20168e-13	5.47509e-12		400.504	-1.69175	3.0291e-12	2.82216e-10		400.504	-1.71899	3.15672e-13	1.97888e-11		400.504	-0.578425	0.013856	0.10265
NCU01181	0	1276.86	-2.97052	3.26106e-09	3.61165e-08	down	1276.86	-1.91948	0.000121279	0.000726297		1276.86	-2.12182	2.20021e-05	0.000176797	down	1276.86	-1.37843	0.00572101	0.028899		1276.86	-1.51577	0.0023357	0.0112167		1276.86	0.25987	0.601518	0.824305
NCU01182	0	45.4512	0.540992	0.145115	0.224477		45.4512	0.400865	0.282222	0.402738		45.4512	-0.687738	0.0952631	0.176786		45.4512	-0.140517	0.718191	0.847561		45.4512	0.228549	0.522958	0.675299		45.4512	0.00513055	0.989124	0.997164
NCU01183	0	450.639	0.713763	0.00499557	0.0125551		450.639	0.848	0.000823576	0.00369335		450.639	0.83743	0.00098196	0.00449717		450.639	0.713713	0.00501706	0.0259645		450.639	0.898078	0.00034333	0.00227147		450.639	0.577108	0.0228943	0.14294
NCU01184	0	169.121	0.280101	0.1466	0.2263		169.121	0.24034	0.211991	0.325198		169.121	0.572283	0.00263947	0.0102057		169.121	0.143159	0.463565	0.656145		169.121	0.198605	0.275723	0.443756		169.121	-0.0597759	0.757331	0.899545
NCU01185	0	21.8735	-1.34647	0.0734339	0.126705		21.8735	0.59214	0.240355	0.357901		21.8735	3.58514	1.31682e-18	1.23823e-16	up	21.8735	1.30962	0.00508902	0.0262741		21.8735	0.740169	0.0929706	0.20442		21.8735	-0.069044	0.897972	0.962129
NCU01186	0	226.134	0.0561497	0.802426	0.870362		226.134	0.0327606	0.883726	0.921009		226.134	0.0141305	0.95006	0.968691		226.134	0.0348686	0.876774	0.938487		226.134	0.0422884	0.845442	0.910436		226.134	0.145505	0.510765	0.772396
NCU01187	0	919.68	0.61103	0.0225193	0.0463195		919.68	0.884483	0.000933491	0.00409079		919.68	0.655352	0.0144346	0.0402738		919.68	1.0978	3.94257e-05	0.000516895		919.68	1.01722	0.000130694	0.000998158		919.68	0.464696	0.0823918	0.305433
NCU01188	0	398.071	0.073366	0.726722	0.811109		398.071	-0.422717	0.0465062	0.0998951		398.071	-0.323704	0.128018	0.221179		398.071	0.0736345	0.725933	0.852091		398.071	-0.207647	0.314891	0.485407		398.071	-0.368707	0.0800409	0.301128
NCU01189	0	386.67	-0.199937	0.531627	0.645047		386.67	0.337042	0.287753	0.407931		386.67	0.154727	0.62694	0.727234		386.67	0.350286	0.269668	0.472643		386.67	0.595535	0.0578468	0.14418		386.67	0.613201	0.0519866	0.232837
NCU01190	0	415.495	0.764175	3.63087e-05	0.000171402		415.495	0.590184	0.00147236	0.00598077		415.495	0.579732	0.00188107	0.00770115		415.495	0.515811	0.00569279	0.0287811		415.495	0.673064	0.000203041	0.00146864		415.495	0.458295	0.0132669	0.0997379
NCU01191	0	63.0935	-0.474469	0.114477	0.184748		63.0935	0.310442	0.25268	0.370511		63.0935	0.484247	0.0738331	0.145542		63.0935	0.712324	0.00698926	0.0336815		63.0935	0.424932	0.0872836	0.195456		63.0935	0.757803	0.00315344	0.0398928
NCU01192	0	194.839	0.0459145	0.791413	0.861048		194.839	0.319186	0.0592095	0.120811		194.839	0.271512	0.113736	0.202399		194.839	-0.0278324	0.873723	0.936581		194.839	0.11779	0.464661	0.626088		194.839	-0.0251144	0.882901	0.955446
NCU01193	0	1450.54	-3.27201	8.15096e-23	6.79223e-21	down	1450.54	-2.4351	1.68596e-13	7.48853e-12	down	1450.54	-2.34112	1.39386e-12	5.19846e-11	down	1450.54	-2.5915	4.78575e-15	7.2651e-13	down	1450.54	-2.87301	2.65408e-18	3.39991e-16	down	1450.54	-1.79721	4.71607e-08	5.91422e-06
NCU01195	0	10556	2.2741	7.4269e-06	4.18167e-05	up	10556	1.9814	9.45331e-05	0.000593336		10556	2.16388	2.00981e-05	0.000162829	up	10556	0.528328	0.297998	0.504285		10556	1.21611	0.0165599	0.0538665		10556	-0.395408	0.43614	0.722811
NCU01196	0	90.7906	2.95196	3.93974e-13	9.25356e-12	up	90.7906	2.15302	1.66628e-07	2.33412e-06	up	90.7906	1.69747	4.78611e-05	0.000344218		90.7906	1.77157	2.05524e-05	0.000297391		90.7906	1.27904	0.00179054	0.00901029		90.7906	-0.420713	0.356618	0.659503
NCU01197	0	4113.32	-0.306651	0.0681677	0.118968		4113.32	-0.0111891	0.94686	0.965428		4113.32	-0.0656082	0.69617	0.782881		4113.32	0.0334711	0.841995	0.918798		4113.32	0.0509282	0.760924	0.856193		4113.32	-0.544326	0.00120159	0.0214821
NCU01198	0	81.6706	0.356709	0.194886	0.287278		81.6706	0.136922	0.622082	0.721504		81.6706	0.187116	0.50352	0.621507		81.6706	-0.437707	0.135024	0.29684		81.6706	-0.329295	0.219324	0.378959		81.6706	0.00225048	0.993495	0.998457
NCU01199	0	176.45	-0.521649	0.0388727	0.0739416		176.45	-0.658764	0.00932866	0.0274945		176.45	-0.720818	0.00491438	0.0169086		176.45	-0.411096	0.102258	0.244972		176.45	-0.396719	0.101095	0.216216		176.45	-0.172699	0.48297	0.751914
NCU01200	0	3493.52	-0.715271	0.00176859	0.00506982		3493.52	-0.217309	0.341285	0.465958		3493.52	-0.365515	0.109767	0.197242		3493.52	0.140845	0.537119	0.719568		3493.52	0.166881	0.463793	0.625359		3493.52	-0.109477	0.631366	0.84127
NCU01201	0	294.514	0.687154	0.00563148	0.0139629		294.514	0.143065	0.567888	0.677312		294.514	-0.0339371	0.893096	0.930576		294.514	-0.66145	0.0101653	0.0446501		294.514	-0.368892	0.136394	0.268146		294.514	0.0175663	0.943958	0.979838
NCU01202	0	671.713	-0.603048	0.00047024	0.00161748		671.713	-0.166548	0.327248	0.451455		671.713	-0.246613	0.149308	0.249537		671.713	0.000106945	0.999497	1		671.713	-0.171524	0.303834	0.474129		671.713	0.14224	0.397607	0.692114
NCU01203	0	51.8196	1.36717	0.000399734	0.00140523		51.8196	1.1592	0.00281564	0.0102498		51.8196	1.02511	0.00900572	0.0275682		51.8196	-0.230197	0.58631	0.758756		51.8196	-0.253379	0.51861	0.672632		51.8196	-0.530178	0.208844	0.499759
NCU01204	0	4205.69	0.322367	0.0956888	0.159287		4205.69	0.430457	0.0260242	0.0629179		4205.69	0.250261	0.196072	0.30761		4205.69	0.547578	0.00463103	0.0243749		4205.69	0.577254	0.00277624	0.0129222		4205.69	0.0987054	0.609867	0.829066
NCU01205	0	95.4593	0.371989	0.114996	0.185398		95.4593	0.629035	0.00628416	0.0199755		95.4593	-0.269287	0.288855	0.414614		95.4593	0.0294294	0.904081	0.954841		95.4593	0.228635	0.300588	0.470552		95.4593	0.949681	1.99863e-05	0.0010173
NCU01206	0	357.737	0.332597	0.0912078	0.152725		357.737	-0.053228	0.788805	0.853501		357.737	-0.0307355	0.877599	0.91996		357.737	-0.328793	0.102497	0.245347		357.737	-0.221493	0.254252	0.419514		357.737	-0.286159	0.149828	0.422884
NCU01207	0	3279.09	-0.876341	9.77463e-07	6.61513e-06		3279.09	0.0469334	0.791981	0.855471		3279.09	-0.295071	0.0980945	0.180704		3279.09	0.183034	0.30361	0.510111		3279.09	0.174018	0.326471	0.496845		3279.09	0.229622	0.196265	0.484137
NCU01208	0	557.181	-0.542251	0.000406269	0.00142559		557.181	-0.966409	5.34587e-10	1.24348e-08		557.181	-0.850369	4.93249e-08	8.11885e-07		557.181	-0.818576	1.35503e-07	4.26365e-06		557.181	-0.770087	2.47674e-07	4.63812e-06		557.181	-0.238386	0.113149	0.363685
NCU01209	0	15.3889	-0.44986	0.665175	0.762656		15.3889	-0.454519	0.661371	0.754012		15.3889	-0.694314	0.508539	0.625518		15.3889	-0.0932591	0.927914	0.967145		15.3889	-0.999169	0.329288	0.499156		15.3889	-1.51267	0.156806	0.4313
NCU01210	0	26.3153	-3.25903	3.63501e-05	0.000171513	down	26.3153	-3.17776	4.06307e-05	0.000287768	down	26.3153	-2.09014	0.00310379	0.0116297	down	26.3153	-1.27459	0.0573213	0.162251		26.3153	-1.7277	0.00803227	0.0306816		26.3153	-0.644125	0.320464	0.626236
NCU01211	0	344.591	-1.75469	0.00827049	0.0195116		344.591	-1.69545	0.0106716	0.0306874		344.591	-1.4811	0.0256718	0.0636263		344.591	-1.26495	0.0564294	0.160409		344.591	-1.31214	0.0471512	0.123748		344.591	-2.13626	0.00131032	0.0225412	down
NCU01212	0	601.997	3.01175	0.0118952	0.0266897	up	601.997	2.68717	0.0259515	0.0628454		601.997	5.34251	4.04018e-06	4.0035e-05	up	601.997	11.0961	4.50872e-22	2.05337e-19	up	601.997	10.0143	2.84907e-18	3.59386e-16	up	601.997	-2.92042	0.113271	0.363685
NCU01213	0	3215.18	-2.07193	0.0047709	0.0120983	down	3215.18	-1.65304	0.0242228	0.0595068		3215.18	-0.465691	0.525035	0.640281		3215.18	2.83144	0.000109571	0.00118515	up	3215.18	1.94864	0.00776032	0.0298882		3215.18	0.0220583	0.97597	0.99272
NCU01214	0	66.2603	-1.45641	0.0798401	0.136359		66.2603	-2.00897	0.0172959	0.0454859	down	66.2603	-2.15951	0.0114565	0.0333105	down	66.2603	1.59339	0.0473029	0.140948		66.2603	0.08877	0.912103	0.948815		66.2603	-0.786045	0.335301	0.640392
NCU01215	0	165.624	0.824786	0.00182073	0.00520681		165.624	0.876182	0.000885748	0.00392045		165.624	0.567138	0.0341731	0.0797612		165.624	0.0360436	0.895216	0.949679		165.624	0.607263	0.0187983	0.0594483		165.624	0.632586	0.0164129	0.115652
NCU01216	0	808.947	-1.16159	0.000264048	0.000973559		808.947	-1.44619	5.7728e-06	5.27076e-05		808.947	-1.36545	1.87855e-05	0.000153955		808.947	-1.40068	1.13331e-05	0.000177012		808.947	-1.55087	9.97396e-07	1.55211e-05		808.947	-1.01652	0.00136796	0.0233011
NCU01218	0	634.506	0.306488	0.107695	0.17583		634.506	0.151777	0.42646	0.550991		634.506	0.203446	0.287428	0.413169		634.506	0.329388	0.0838683	0.213369		634.506	0.377925	0.0437958	0.117129		634.506	0.200854	0.290096	0.595541
NCU01219	0	1737.31	0.252546	0.535784	0.648613		1737.31	0.166854	0.682477	0.771922		1737.31	0.46675	0.252379	0.374668		1737.31	-0.240365	0.555984	0.73589		1737.31	-0.0228458	0.955288	0.973685		1737.31	-0.542103	0.184161	0.470627
NCU01220	0	421.729	-0.512847	0.0161646	0.0348259		421.729	-0.628758	0.00322816	0.0114135		421.729	-0.967242	8.07934e-06	7.31693e-05		421.729	-0.958999	9.20802e-06	0.000148651		421.729	-0.975673	3.4272e-06	4.48785e-05		421.729	-0.13988	0.505947	0.769048
NCU01221	0	13318.7	0.918815	0.000243141	0.000906975		13318.7	0.596218	0.0172751	0.0454859		13318.7	0.754425	0.00259058	0.0100538		13318.7	0.0729094	0.771023	0.877664		13318.7	0.298558	0.233052	0.395079		13318.7	-0.106417	0.670958	0.860118
NCU01223	0	7.18246	-2.72957	0.00745531	0.0177855	down	7.18246	-2.19391	0.0181392	0.0470459	down	7.18246	-4.64959	0.0036309	0.0131585	down	7.18246	-2.37075	0.0141901	0.0576195		7.18246	-2.5996	0.00231957	0.0111488	down	7.18246	-0.7567	0.339579	0.644523
NCU01224	0	1490.87	-0.0294297	0.869719	0.918755		1490.87	0.216231	0.226749	0.341903		1490.87	0.0536453	0.764964	0.837999		1490.87	0.284101	0.112331	0.26094		1490.87	0.421921	0.0174631	0.0560888		1490.87	-0.0870402	0.626772	0.838896
NCU01225	0	460.838	0.194177	0.342381	0.455574		460.838	0.271978	0.181964	0.290112		460.838	0.233155	0.254831	0.377358		460.838	0.554997	0.0062359	0.0308906		460.838	0.529759	0.0078932	0.030255		460.838	0.463745	0.0216698	0.137953
NCU01227	0	3867.85	1.47429	0.000799658	0.00254674		3867.85	1.0899	0.013199	0.0364694		3867.85	1.49195	0.00069136	0.0033595		3867.85	0.815261	0.063817	0.175249		3867.85	1.0055	0.0221797	0.0680007		3867.85	-0.614965	0.162531	0.439493
NCU01229	0	195.434	0.677858	0.00548047	0.0136378		195.434	0.404714	0.0995231	0.182941		195.434	0.532672	0.0303022	0.0724677		195.434	-0.0887333	0.72458	0.851227		195.434	0.275393	0.250205	0.414178		195.434	0.199976	0.415225	0.705217
NCU01230	0	104.894	0.138874	0.777443	0.85204		104.894	0.0802028	0.870308	0.912797		104.894	0.916594	0.0592573	0.122206		104.894	0.559382	0.251644	0.451758		104.894	0.0435643	0.928249	0.958585		104.894	-0.180289	0.71375	0.882501
NCU01231	0	42.5465	-0.0838854	0.922455	0.952809		42.5465	-3.42856	0.000319364	0.0016654	down	42.5465	-1.33343	0.128992	0.222557		42.5465	-3.03325	0.00117035	0.00799291	down	42.5465	-3.64276	5.85217e-05	0.000511645	down	42.5465	-0.202431	0.814005	0.927589
NCU01233	0	756.234	-2.67107	3.68896e-09	4.05039e-08	down	756.234	-2.12119	2.50221e-06	2.53345e-05	down	756.234	-1.16742	0.00926834	0.0282129		756.234	-1.30779	0.00356979	0.0197756		756.234	-1.52651	0.000646122	0.00383551		756.234	-0.509437	0.254789	0.551889
NCU01234	0	557.513	-0.199113	0.0866221	0.146247		557.513	-0.446042	0.000147892	0.000858317		557.513	-0.257825	0.0279108	0.0678503		557.513	-0.261111	0.0254672	0.0892178		557.513	-0.321873	0.00363774	0.0161334		557.513	-0.351621	0.00226712	0.032209
NCU01235	0	326.703	-0.226233	0.272443	0.37959		326.703	-0.22806	0.267472	0.38719		326.703	-0.2745	0.185178	0.294333		326.703	-0.147426	0.473714	0.666511		326.703	-0.234314	0.241494	0.404123		326.703	0.024089	0.905401	0.964745
NCU01236	0	60.3608	1.92	1.96428e-07	1.56603e-06		60.3608	0.606818	0.117327	0.207244		60.3608	0.240778	0.547933	0.660374		60.3608	1.48251	7.45824e-05	0.000872111		60.3608	0.686204	0.0632659	0.153924		60.3608	-0.211546	0.599362	0.823349
NCU01238	0	1145.77	-0.865489	0.00109654	0.00334123		1145.77	-0.815273	0.00208418	0.00795081		1145.77	-0.579827	0.0284925	0.068942		1145.77	-0.385901	0.144219	0.311028		1145.77	-0.616425	0.019141	0.0604025		1145.77	0.0295666	0.910602	0.966809
NCU01240	0	1554.43	0.722715	0.00591588	0.01457		1554.43	0.740578	0.00478216	0.0158135		1554.43	1.10979	2.32551e-05	0.000184849		1554.43	0.458448	0.0812042	0.208814		1554.43	0.805768	0.00207706	0.0101882		1554.43	0.340891	0.194342	0.482813
NCU01241	0	932.717	1.09854	0.0075261	0.0179276		932.717	0.664399	0.106269	0.192284		932.717	0.770307	0.0611427	0.125495		932.717	0.0838544	0.838784	0.916645		932.717	0.18038	0.660633	0.785913		932.717	-0.483501	0.24121	0.537382
NCU01242	0	229.372	-0.590709	0.0235296	0.0481289		229.372	-0.773456	0.00314725	0.0112217		229.372	-0.551159	0.0348818	0.0810089		229.372	-0.473278	0.06875	0.184805		229.372	-0.490534	0.0524051	0.133891		229.372	-0.221017	0.387667	0.685905
NCU01243	0	1050.75	-1.50319	2.88516e-16	1.08426e-14		1050.75	-0.989076	5.03984e-08	7.87052e-07		1050.75	-0.913907	4.94039e-07	6.19405e-06		1050.75	-0.334168	0.063332	0.174249		1050.75	-0.547494	0.00214115	0.0104561		1050.75	-0.449514	0.0122797	0.0950375
NCU01245	0	105.087	1.60501	2.21596e-07	1.74491e-06		105.087	0.788502	0.0128009	0.0355473		105.087	1.10835	0.000432073	0.00226383		105.087	-0.170004	0.611296	0.77696		105.087	0.304189	0.327483	0.497615		105.087	-0.0334598	0.918038	0.970616
NCU01246	0	56.059	2.31192	6.7123e-12	1.23226e-10	up	56.059	0.433106	0.240562	0.358088		56.059	1.11895	0.00164673	0.00690815		56.059	0.571542	0.120257	0.274038		56.059	0.961224	0.00450576	0.0191473		56.059	-0.0433918	0.908333	0.966265
NCU01247	0	471.438	0.0197482	0.871294	0.919661		471.438	0.271302	0.0229915	0.0570208		471.438	0.246135	0.0414113	0.0921797		471.438	0.262426	0.0289134	0.0979207		471.438	0.195751	0.085482	0.19265		471.438	0.0133199	0.91125	0.966897
NCU01248	0	66.5524	0.00500558	0.984847	0.996791		66.5524	0.634746	0.00929762	0.0274213		66.5524	0.770513	0.00162255	0.00682671		66.5524	0.316146	0.214573	0.407915		66.5524	0.471298	0.0384789	0.105691		66.5524	0.371143	0.129389	0.392429
NCU01249	0	2034.76	0.798391	3.08958e-09	3.45075e-08		2034.76	0.449546	0.00087665	0.00388796		2034.76	0.592356	1.16528e-05	0.000100585		2034.76	0.404435	0.00280382	0.0163818		2034.76	0.402038	0.00268339	0.0125561		2034.76	0.115057	0.394984	0.689674
NCU01250	0	224.134	-1.47487	1.07519e-05	5.78528e-05		224.134	-0.72587	0.0257227	0.0624108		224.134	-0.0323525	0.91982	0.948629		224.134	-0.246068	0.445364	0.64141		224.134	-0.369841	0.243489	0.406335		224.134	0.545207	0.0854652	0.31125
NCU01252	0	341.693	-0.452893	0.0262864	0.0530545		341.693	-0.734155	0.000352511	0.00181617		341.693	-0.689728	0.000831264	0.00388965		341.693	-0.556629	0.00657156	0.0321264		341.693	-0.782982	8.44318e-05	0.000694872		341.693	-0.049531	0.80422	0.925073
NCU01253	0	199.581	-1.05542	9.42155e-07	6.43861e-06		199.581	-0.537203	0.00889917	0.026467		199.581	-0.151142	0.455067	0.576183		199.581	0.041115	0.836771	0.915834		199.581	-0.0713928	0.709197	0.823298		199.581	0.0284697	0.884858	0.956607
NCU01254	0	353.276	0.0299458	0.917289	0.948937		353.276	-0.086096	0.765454	0.834568		353.276	0.288585	0.3156	0.442089		353.276	0.400037	0.163197	0.337833		353.276	0.380234	0.180262	0.327826		353.276	-0.49068	0.0900776	0.319836
NCU01255	0	1044.72	-0.507874	0.000921623	0.00287684		1044.72	-0.579455	0.000156772	0.000898059		1044.72	-0.123712	0.416789	0.541845		1044.72	-0.644542	2.80341e-05	0.000388127		1044.72	-0.574663	0.000135717	0.0010297		1044.72	-0.116306	0.442341	0.726296
NCU01256	0	434.484	-0.20282	0.33929	0.452447		434.484	-0.429876	0.0437133	0.0951915		434.484	-0.00435473	0.983586	0.990308		434.484	0.0660674	0.754269	0.868257		434.484	-0.429528	0.0393709	0.107374		434.484	-0.221101	0.294409	0.598993
NCU01257	0	286.641	1.76765	0.00591822	0.014572		286.641	0.93053	0.148086	0.248374		286.641	1.1773	0.0671935	0.135167		286.641	-0.307011	0.635386	0.790056		286.641	-0.0312742	0.961213	0.977244		286.641	-1.20086	0.0649768	0.266088
NCU01258	0	960.542	0.475587	0.319259	0.430559		960.542	-0.0475443	0.920748	0.945896		960.542	-0.535031	0.26363	0.387596		960.542	-0.579985	0.225582	0.420681		960.542	-0.498195	0.296658	0.466549		960.542	-0.00513337	0.991425	0.997806
NCU01259	0	102.634	1.29843	0.0499303	0.0915054		102.634	0.165098	0.804412	0.865019		102.634	0.353581	0.595745	0.700704		102.634	-1.61969	0.0187077	0.0711904		102.634	-1.08777	0.103171	0.219847		102.634	-1.70012	0.0129433	0.0982031
NCU01260	0	106.334	-0.133944	0.575185	0.684806		106.334	-0.211652	0.376154	0.501709		106.334	-0.136307	0.570996	0.680193		106.334	-0.155672	0.516414	0.70282		106.334	-0.487329	0.0321687	0.0920192		106.334	-0.494042	0.0395649	0.199059
NCU01261	0	0.979857	3.41061	0.191836	0.283786		0.979857	-0.641581	0.826342	1		0.979857	2.98745	0.25815	1		0.979857	0.913556	0.754349	1		0.979857	-1.76493	0.546154	1		0.979857	-0.874492	0.764909	1
NCU01262	0	0.0688861	0.0542801	0.991829	0.997555		0.0688861	-0.0162927	0.997548	1		0.0688861	0.138746	0.979118	1		0.0688861	0.0836569	0.987408	1		0.0688861	0.413632	0.937618	1		0.0688861	-0.2492	0.962503	1
NCU01266	0	114.094	1.61521	4.20925e-05	0.000195907		114.094	1.26539	0.00140213	0.00572972		114.094	1.47333	0.000197099	0.00116767		114.094	0.119805	0.76989	0.877022		114.094	0.337925	0.392131	0.561716		114.094	-0.289882	0.480451	0.750792
NCU01267	0	321.443	0.825947	0.000741893	0.00238176		321.443	0.391886	0.111744	0.199847		321.443	0.230246	0.353398	0.481084		321.443	-0.0555487	0.823882	0.90816		321.443	0.0938949	0.699589	0.81665		321.443	-0.451068	0.0712562	0.280634
NCU01268	0	129.891	-1.40737	2.37813e-09	2.72277e-08		129.891	-0.744073	0.000631083	0.0029766		129.891	-0.773118	0.000482595	0.00248437		129.891	-0.523474	0.0150788	0.0606304		129.891	-0.383643	0.0534077	0.135809		129.891	-0.106219	0.603315	0.825373
NCU01269	0	215.874	-0.737583	0.138282	0.215578		215.874	-0.921494	0.0643504	0.129625		215.874	-0.908399	0.0686298	0.137275		215.874	-1.21804	0.0149245	0.0601497		215.874	-1.20192	0.0151821	0.0503167		215.874	-1.12818	0.0234961	0.145199
NCU01270	0	36.4001	-0.871883	0.0604817	0.107896		36.4001	-0.876755	0.057808	0.118471		36.4001	-0.776536	0.0942464	0.175415		36.4001	-0.475413	0.29335	0.499481		36.4001	-0.34275	0.421248	0.588682		36.4001	-0.894669	0.0492883	0.225243
NCU01271	0	2010.67	0.089334	0.895062	0.936395		2010.67	-0.594047	0.380551	0.505724		2010.67	-0.19816	0.769873	0.841493		2010.67	-1.80817	0.00767234	0.0362979		2010.67	-1.34576	0.0469404	0.123301		2010.67	-1.73967	0.0102794	0.0851892
NCU01272	0	1536.37	0.00483349	0.987154	0.997555		1536.37	0.175701	0.558044	0.668068		1536.37	-0.0917583	0.760028	0.834624		1536.37	0.101799	0.734468	0.856913		1536.37	0.299409	0.316946	0.487554		1536.37	0.313742	0.295093	0.599302
NCU01273	0	343.969	-0.256559	0.290888	0.400054		343.969	-0.563085	0.0211779	0.0534277		343.969	-0.372232	0.127228	0.220201		343.969	-0.691933	0.00488486	0.0254324		343.969	-0.57554	0.0161947	0.0528794		343.969	-0.250727	0.298995	0.602656
NCU01274	0	180.009	-0.571011	0.00975845	0.0224796		180.009	-0.774547	0.000513388	0.00251158		180.009	-0.448408	0.0419099	0.093064		180.009	-0.318386	0.144059	0.310937		180.009	-0.378925	0.0681691	0.162631		180.009	0.0224126	0.915458	0.969223
NCU01275	0	102.101	-1.29263	0.00590705	0.014552		102.101	-0.566281	0.21614	0.32999		102.101	-0.635608	0.167516	0.272785		102.101	-0.798503	0.0838878	0.213369		102.101	-0.35465	0.428551	0.595311		102.101	0.312281	0.486795	0.755559
NCU01276	0	194.607	0.779789	1.67474e-06	1.07424e-05		194.607	0.793593	9.39226e-07	1.08097e-05		194.607	0.609109	0.000247948	0.00140559		194.607	0.494787	0.00306405	0.0175514		194.607	0.721756	2.33423e-06	3.1988e-05		194.607	0.48266	0.00302049	0.0388933
NCU01277	0	291.437	0.399033	0.105874	0.173345		291.437	0.489429	0.0464879	0.09988		291.437	0.679385	0.00567393	0.0190547		291.437	0.521131	0.0342835	0.111357		291.437	0.680526	0.00472987	0.0199462		291.437	-0.369095	0.140155	0.409716
NCU01278	0	310.28	-0.221894	0.179659	0.268847		310.28	0.300327	0.0595976	0.121463		310.28	0.205939	0.202668	0.315976		310.28	0.482248	0.00238226	0.0143549		310.28	0.435007	0.00429039	0.018436		310.28	0.0490778	0.758416	0.900092
NCU01279	0	390.284	0.911571	0.00271973	0.00741483		390.284	0.368641	0.22754	0.343036		390.284	0.589902	0.0532981	0.112167		390.284	-0.213636	0.488577	0.680563		390.284	0.100146	0.741219	0.843522		390.284	-0.173863	0.570759	0.806786
NCU01281	0	16.1168	-1.09236	0.17943	0.268668		16.1168	-0.463199	0.546537	0.658781		16.1168	-0.0155383	0.983563	0.990308		16.1168	0.550639	0.451893	0.646983		16.1168	0.455782	0.520305	0.673335		16.1168	0.501177	0.489105	0.757513
NCU01282	0	732.961	-1.03006	1.99335e-13	4.92327e-12		732.961	-0.592564	1.48035e-05	0.000120044		732.961	-0.542768	7.80259e-05	0.000526466		732.961	-0.347017	0.0107243	0.0465152		732.961	-0.340371	0.00976984	0.0355812		732.961	0.32786	0.0131796	0.0992539
NCU01283	0	1987.17	0.381376	0.0485504	0.0893354		1987.17	0.693248	0.000326838	0.00169737		1987.17	0.647158	0.000805936	0.00379727		1987.17	0.448829	0.0202348	0.0756332		1987.17	0.472476	0.0140196	0.0471176		1987.17	0.0710591	0.713241	0.882501
NCU01284	0	78.6321	-0.103468	0.632045	0.73506		78.6321	-0.395908	0.0754956	0.147178		78.6321	0.109447	0.606647	0.710031		78.6321	-0.328554	0.142111	0.307806		78.6321	-0.0281261	0.88277	0.932391		78.6321	0.115881	0.568682	0.80557
NCU01285	0	543.034	-2.72389	3.6401e-10	4.92699e-09	down	543.034	-1.89048	1.04009e-05	8.88243e-05		543.034	-1.82149	2.19641e-05	0.000176652		543.034	-0.815763	0.0552301	0.157854		543.034	-1.06228	0.0122047	0.0423547		543.034	0.48836	0.248539	0.54564
NCU01288	0	340.094	-0.0791518	0.56619	0.676475		340.094	0.104046	0.44191	0.565847		340.094	0.341207	0.0111901	0.0326955		340.094	0.311741	0.0202434	0.0756332		340.094	0.239273	0.0592313	0.146816		340.094	-0.0959427	0.477205	0.749547
NCU01289	0	608.636	-0.594534	0.00330469	0.00878226		608.636	-0.235825	0.239291	0.356798		608.636	-0.976842	1.94686e-06	2.11145e-05		608.636	0.237368	0.233118	0.430744		608.636	-0.0765256	0.697663	0.815046		608.636	0.288182	0.145615	0.417983
NCU01290	0	974.182	1.68188	0.00558218	0.0138514		974.182	0.958229	0.114527	0.203488		974.182	1.14289	0.0597884	0.1231		974.182	-0.386622	0.525241	0.709477		974.182	-0.0671436	0.911939	0.948756		974.182	-0.881769	0.147543	0.42038
NCU01291	0	1024.37	-1.4107	1.91714e-08	1.85388e-07		1024.37	-0.571407	0.0213346	0.0536971		1024.37	-0.692035	0.00542844	0.018398		1024.37	0.156612	0.526153	0.710266		1024.37	-0.019384	0.937189	0.963907		1024.37	0.136467	0.580084	0.812869
NCU01292	0	26.4704	-0.0544687	0.93068	0.958322		26.4704	-1.82101	0.00992797	0.0289329		26.4704	-1.64136	0.0197933	0.0519302		26.4704	0.506183	0.409935	0.61158		26.4704	0.67894	0.255804	0.420836		26.4704	-0.786163	0.21872	0.512201
NCU01294	0	590.759	-1.47367	5.61726e-12	1.04322e-10		590.759	-1.39256	6.29393e-11	1.7661e-09		590.759	-0.974364	4.16283e-06	4.09747e-05		590.759	-0.897344	2.12621e-05	0.000305109		590.759	-1.06171	3.2578e-07	5.89551e-06		590.759	-0.945762	6.66751e-06	0.000421124
NCU01296	0	1890.37	-0.726884	0.00165878	0.00479666		1890.37	-0.630023	0.00634301	0.0201239		1890.37	-0.774302	0.00081695	0.00384097		1890.37	0.413518	0.0718282	0.19042		1890.37	0.193879	0.397418	0.566943		1890.37	0.787429	0.00059272	0.0128864
NCU01297	0	56.2147	-2.31864	0.0635179	0.112119		56.2147	-0.627784	0.487938	0.60762		56.2147	-4.65864	0.0037932	0.0136593	down	56.2147	-4.71373	0.00339946	0.0190267	down	56.2147	-2.44634	0.0149819	0.0497837	down	56.2147	6.06899	2.06259e-17	1.27483e-14	up
NCU01298	0	1021.87	7.45901	3.2468e-09	3.60534e-08	up	1021.87	1.22371	0.333417	0.457763		1021.87	-1.02969	0.423348	0.547472		1021.87	-0.215534	0.865702	0.93217		1021.87	0.115488	0.927264	0.958244		1021.87	0.132897	0.916601	0.969839
NCU01299	0	128.828	0.199472	0.501436	0.615822		128.828	0.557849	0.0562358	0.115921		128.828	-0.316816	0.300016	0.426821		128.828	0.202994	0.494352	0.685961		128.828	0.0344497	0.904664	0.944971		128.828	0.641037	0.0268318	0.158482
NCU01300	0	391.926	0.807679	0.00390845	0.0101531		391.926	0.951069	0.000658978	0.0030786		391.926	1.15779	3.34104e-05	0.00025219		391.926	0.323426	0.251531	0.451721		391.926	0.69923	0.0116622	0.0408407		391.926	-0.551869	0.0530985	0.235142
NCU01301	0	88.8596	1.8631	0.00470224	0.0119432		88.8596	0.766859	0.248032	0.36581		88.8596	0.979654	0.139797	0.236854		88.8596	-0.538949	0.427333	0.62583		88.8596	-0.0506492	0.939022	0.964781		88.8596	-0.788385	0.244673	0.542026
NCU01302	0	229.337	-0.593217	0.0652739	0.114543		229.337	-0.117478	0.711674	0.795358		229.337	-0.206382	0.51821	0.634062		229.337	0.0659266	0.83542	0.915281		229.337	-0.369197	0.239477	0.402193		229.337	-0.0318985	0.91962	0.970897
NCU01303	0	225.938	0.334972	0.240351	0.341784		225.938	0.345439	0.225168	0.339982		225.938	0.282524	0.323615	0.450462		225.938	0.264473	0.35504	0.561123		225.938	0.317357	0.257084	0.422216		225.938	-0.3098	0.281729	0.585446
NCU01304	0	172.32	0.975573	0.00185467	0.00528484		172.32	0.676284	0.0316821	0.0735201		172.32	0.631747	0.0456622	0.0997055		172.32	-0.494274	0.131047	0.290755		172.32	-0.126721	0.685553	0.80538		172.32	0.0298704	0.925111	0.972425
NCU01305	0	596.781	-1.41364	1.28819e-08	1.28725e-07		596.781	-0.632947	0.00971233	0.028398		596.781	-0.620205	0.0114425	0.0332807		596.781	-0.659988	0.00710762	0.0340544		596.781	-0.888126	0.000251478	0.00175301		596.781	-0.519306	0.0331269	0.179603
NCU01306	0	112.235	-0.00290752	0.989947	0.997555		112.235	0.344781	0.123799	0.215661		112.235	-0.454295	0.0608603	0.125044		112.235	0.0569629	0.804553	0.896561		112.235	-0.118018	0.585512	0.727385		112.235	0.139292	0.533364	0.787442
NCU01307	0	207.624	0.0562741	0.811756	0.877146		207.624	0.88737	0.000100066	0.000620256		207.624	0.681566	0.00314526	0.0117403		207.624	0.48217	0.0377335	0.1196		207.624	0.554544	0.0132935	0.0453658		207.624	0.133802	0.564501	0.803236
NCU01309	0	229.212	-0.352794	0.122723	0.195358		229.212	0.51943	0.0175499	0.0458519		229.212	0.329073	0.137607	0.234176		229.212	0.606965	0.00553071	0.0281513		229.212	0.619961	0.00350381	0.0155912		229.212	0.328361	0.132682	0.396715
NCU01310	0	372.136	0.115743	0.339887	0.452822		372.136	0.0655569	0.588226	0.694169		372.136	0.0841674	0.491922	0.610345		372.136	-0.0389545	0.751869	0.866763		372.136	-0.0336337	0.767298	0.859805		372.136	0.19788	0.0931866	0.326038
NCU01311	0	28.2976	2.79289	3.88766e-09	4.23357e-08	up	28.2976	1.46439	0.00610697	0.0194896		28.2976	4.36068	8.90557e-23	1.31194e-20	up	28.2976	2.40726	8.64975e-07	2.10242e-05	up	28.2976	3.32787	4.58928e-14	3.19407e-12	up	28.2976	1.36131	0.00960873	0.081275
NCU01312	0	372.922	-1.66002	0.0137627	0.0301735		372.922	-2.06955	0.00216779	0.00821306	down	372.922	-1.35973	0.0434392	0.0957027		372.922	-1.39377	0.0384356	0.121248		372.922	-1.65211	0.0138955	0.0468608		372.922	-2.95649	1.29131e-05	0.000716588	down
NCU01313	0	0.32297	-2.09607	0.689173	0.780953		0.32297	-2.16669	0.679302	1		0.32297	-2.01165	0.701102	1		0.32297	-2.06674	0.693327	1		0.32297	-3.29002	0.530166	1		0.32297	-0.879689	0.866417	1
NCU01314	0	1.02783	-1.74549	0.391615	0.508172		1.02783	-1.80428	0.373336	1		1.02783	-3.12177	0.128563	1		1.02783	-1.73847	0.396463	1		1.02783	-2.92581	0.148514	1		1.02783	-0.460361	0.784042	1
NCU01315	0	895.122	-1.50426	2.2707e-06	1.4213e-05		895.122	-1.15292	0.000277804	0.00147655		895.122	-1.27491	6.02652e-05	0.000418777		895.122	-0.699014	0.0271978	0.0932419		895.122	-0.971303	0.00206891	0.0101652		895.122	-1.11699	0.000419239	0.0102672
NCU01317	0	14671.3	0.76016	0.00549736	0.0136657		14671.3	0.329065	0.229479	0.345371		14671.3	0.503547	0.0659292	0.133169		14671.3	-0.179543	0.512158	0.699188		14671.3	0.0688005	0.801573	0.882769		14671.3	-0.000778735	0.997731	1
NCU01318	0	1892.44	-0.039242	0.883085	0.927816		1892.44	0.421923	0.113183	0.20178		1892.44	0.331536	0.213586	0.328214		1892.44	0.592583	0.0260653	0.0905268		1892.44	0.444723	0.0942398	0.206069		1892.44	-0.39029	0.143656	0.414766
NCU01319	0	491.536	-0.471744	0.137787	0.215016		491.536	-0.640387	0.0441589	0.0959491		491.536	-0.606962	0.0567664	0.1182		491.536	-0.561603	0.0776174	0.201871		491.536	-0.966344	0.00223986	0.0108377		491.536	-0.52925	0.0951897	0.330263
NCU01320	0	312.159	0.40611	0.17403	0.261605		312.159	0.718058	0.0157642	0.0423267		312.159	0.155155	0.605331	0.708866		312.159	-0.603852	0.047543	0.141419		312.159	-0.377355	0.204392	0.358954		312.159	-0.173854	0.562202	0.801747
NCU01321	0	56.1032	0.417466	0.201567	0.295988		56.1032	-0.344695	0.315945	0.437992		56.1032	-0.386406	0.269477	0.393704		56.1032	0.15774	0.635748	0.790392		56.1032	-0.118331	0.708487	0.82269		56.1032	0.278332	0.390116	0.687565
NCU01322	0	187.572	1.10581	7.65097e-08	6.65329e-07		187.572	0.647028	0.00195479	0.00751236		187.572	0.269108	0.21022	0.324509		187.572	0.0533241	0.805862	0.897673		187.572	0.051394	0.801845	0.882782		187.572	0.240437	0.253602	0.551153
NCU01323	0	409.497	-0.209904	0.358732	0.472988		409.497	-0.0328085	0.885323	0.921824		409.497	-0.157554	0.491226	0.609653		409.497	0.0108223	0.962096	0.983579		409.497	-0.134573	0.548134	0.696414		409.497	-0.260217	0.252589	0.550819
NCU01324	0	256.863	-0.550143	0.0082472	0.0194662		256.863	-0.236073	0.248067	0.36581		256.863	0.300383	0.135746	0.231893		256.863	-0.578866	0.0055906	0.028406		256.863	-0.497871	0.0121443	0.042228		256.863	-0.0604416	0.763838	0.903365
NCU01325	0	3.57133	5.27978	0.000153415	0.000604107	up	3.57133	2.42441	0.149875	0.250726		3.57133	5.65349	4.45792e-05	0.000324309	up	3.57133	1.52913	0.436049	0.633183		3.57133	4.32032	0.00183575	0.00918809	up	3.57133	2.22363	0.18486	0.4713
NCU01326	0	1.65024	4.35365	0.0426015	0.0800019		1.65024	1.47076	0.557384	1		1.65024	3.63767	0.0976655	1		1.65024	2.54434	0.271358	1		1.65024	3.27745	0.126015	1		1.65024	2.1293	0.360028	1
NCU01327	0	359.115	-0.22516	0.154987	0.236806		359.115	0.434755	0.00419205	0.0141642		359.115	0.211127	0.172648	0.27897		359.115	0.270083	0.0791322	0.204886		359.115	0.498036	0.000650469	0.00385872		359.115	0.303982	0.0442885	0.212389
NCU01328	0	10848.8	0.873362	0.000344244	0.00122955		10848.8	1.4516	2.6481e-09	5.40567e-08		10848.8	1.73595	1.09134e-12	4.14006e-11		10848.8	1.57709	1.00157e-10	7.04603e-09		10848.8	1.68672	4.53592e-12	2.4447e-10		10848.8	-0.311237	0.202552	0.492047
NCU01329	0	31.0828	2.58209	4.00195e-12	7.7633e-11	up	31.0828	1.25282	0.00171056	0.0067438		31.0828	1.42292	0.000361498	0.00193889		31.0828	0.364435	0.409206	0.610652		31.0828	0.725451	0.0587886	0.146004		31.0828	-0.935537	0.068217	0.273641
NCU01330	0	422.19	-1.18127	0.000551041	0.00185155		422.19	-0.675736	0.0463658	0.0997147		422.19	-0.41636	0.219117	0.334966		422.19	0.0273824	0.935295	0.97028		422.19	-0.343642	0.305908	0.475707		422.19	-0.768755	0.0232207	0.144101
NCU01331	0	627.159	1.66376	0.000805046	0.00256304		627.159	0.521455	0.29461	0.415188		627.159	0.966108	0.0519919	0.109889		627.159	-0.175794	0.72462	0.851227		627.159	0.0555761	0.91093	0.948152		627.159	-0.737065	0.140133	0.409716
NCU01332	0	2942.69	-0.407266	0.027391	0.0548564		2942.69	-0.0238174	0.897108	0.930207		2942.69	0.104253	0.571409	0.680318		2942.69	0.0900704	0.624788	0.784869		2942.69	0.132799	0.469163	0.629946		2942.69	0.0626306	0.73348	0.89028
NCU01333	0	902.335	-0.779515	4.25983e-05	0.000197493		902.335	-0.613067	0.00122266	0.00510489		902.335	-0.418793	0.0270683	0.0662761		902.335	0.0636598	0.734854	0.856913		902.335	-0.122421	0.511051	0.665858		902.335	-0.288658	0.124718	0.38337
NCU01334	0	6.30583	0.174688	0.85834	0.910905		6.30583	0.825719	0.374724	0.500254		6.30583	-0.311065	0.763852	0.837367		6.30583	0.882933	0.343657	0.550985		6.30583	0.576032	0.519651	0.672954		6.30583	0.0257973	0.978704	0.993637
NCU01335	0	439.159	-1.18345	1.34257e-06	8.80015e-06		439.159	-0.0271354	0.908828	0.938094		439.159	-0.151526	0.524724	0.640078		439.159	0.11337	0.632065	0.789101		439.159	-0.0325677	0.889164	0.936525		439.159	0.290086	0.217117	0.510104
NCU01336	0	181.199	0.409063	0.0422177	0.0794524		181.199	0.204581	0.313443	0.435206		181.199	0.355124	0.0802002	0.15522		181.199	0.357751	0.0769691	0.200546		181.199	0.324964	0.0915062	0.202105		181.199	-0.151581	0.458538	0.738229
NCU01337	0	96.1696	-0.062384	0.800197	0.868239		96.1696	-0.396148	0.11693	0.206708		96.1696	-0.267178	0.29157	0.417511		96.1696	0.21922	0.363844	0.57		96.1696	-0.0826847	0.717414	0.828053		96.1696	0.802517	0.000444504	0.010634
NCU01338	0	106.139	0.664412	0.00797821	0.0188965		106.139	-0.581108	0.034871	0.0794803		106.139	1.17543	1.61159e-06	1.7918e-05		106.139	0.462851	0.068439	0.184315		106.139	0.389555	0.105192	0.222758		106.139	0.256621	0.308528	0.612597
NCU01339	0	115.387	1.10128	0.000132503	0.000532721		115.387	2.45054	3.74559e-19	3.61909e-17	up	115.387	1.10261	0.000139471	0.00087184		115.387	1.39404	9.53118e-07	2.25954e-05		115.387	1.53679	1.76749e-08	4.51528e-07		115.387	0.465198	0.113393	0.363807
NCU01340	0	109.44	1.19533	0.0174177	0.0371331		109.44	0.736387	0.144731	0.243951		109.44	0.638175	0.207845	0.322381		109.44	0.18056	0.723417	0.850622		109.44	0.33616	0.502447	0.658042		109.44	-0.58119	0.259303	0.55773
NCU01341	0	256.599	0.906562	0.00308402	0.00825778		256.599	0.769398	0.0121113	0.0339847		256.599	0.82815	0.00700679	0.0224247		256.599	0.571476	0.0636951	0.175025		256.599	0.556022	0.066941	0.160528		256.599	-0.183943	0.55421	0.799457
NCU01342	0	795.425	-0.312342	0.0139248	0.0304938		795.425	-0.155742	0.216116	0.32999		795.425	-0.204092	0.107729	0.194608		795.425	-0.233491	0.0654501	0.178375		795.425	-0.218322	0.0746022	0.174124		795.425	0.0207741	0.867242	0.947928
NCU01343	0	268.499	0.702342	0.0676664	0.118265		268.499	0.914628	0.0170421	0.0450947		268.499	0.94378	0.0139266	0.0390908		268.499	0.570395	0.138512	0.302551		268.499	0.639146	0.0936495	0.205249		268.499	-0.151155	0.696137	0.874137
NCU01344	0	232.088	1.1151	2.86835e-06	1.76768e-05		232.088	0.980413	4.00154e-05	0.000285183		232.088	1.11816	2.83187e-06	2.91057e-05		232.088	0.545382	0.0247227	0.0875667		232.088	0.800621	0.000627085	0.00374767		232.088	0.309103	0.201509	0.490756
NCU01345	0	1033.98	-1.22982	1.20208e-06	7.99968e-06		1033.98	-1.18659	2.73448e-06	2.73417e-05		1033.98	-1.01279	6.23502e-05	0.000430345		1033.98	-0.993193	8.5291e-05	0.000970007		1033.98	-1.04535	3.10813e-05	0.000301567		1033.98	-0.658276	0.00887915	0.0772174
NCU01346	0	0.609473	-1.44532	0.555389	0.666287		0.609473	-0.0286225	0.990587	1		0.609473	-1.36086	0.578736	1		0.609473	1.04477	0.638777	1		0.609473	-0.194255	0.930541	1		0.609473	0.695007	0.755148	1
NCU01347	0	186.26	-1.39243	1.21447e-05	6.46212e-05		186.26	-0.886104	0.00424692	0.0143239		186.26	-0.89593	0.00408032	0.0144727		186.26	-0.33276	0.275532	0.478943		186.26	-0.466072	0.118207	0.24321		186.26	0.779681	0.00864957	0.0764502
NCU01348	0	1301.59	-4.3833	1.8319e-10	2.63194e-09	down	1301.59	-1.58939	0.0197023	0.0503758		1301.59	-3.58158	1.69849e-07	2.42536e-06	down	1301.59	-1.15098	0.0911736	0.225665		1301.59	-1.67478	0.0139305	0.0469307		1301.59	-1.74624	0.0103981	0.0856906
NCU01349	0	237.805	-2.6857	1.88322e-06	1.19754e-05	down	237.805	-1.95053	0.000470421	0.00233599		237.805	-2.0768	0.000205315	0.00120503	down	237.805	-2.20211	8.38454e-05	0.000958407	down	237.805	-2.17248	8.83062e-05	0.000720744	down	237.805	-2.10198	0.000162218	0.00510425	down
NCU01351	0	7.99646	2.30449	0.00317086	0.00846888	up	7.99646	0.696839	0.424313	0.549202		7.99646	2.08852	0.00841786	0.0261715	up	7.99646	1.20359	0.151474	0.321804		7.99646	1.11547	0.153174	0.29242		7.99646	0.0731781	0.936061	0.976696
NCU01353	0	4068	0.620183	0.0979794	0.162418		4068	0.352751	0.346668	0.471633		4068	-0.307636	0.412137	0.538091		4068	-0.241229	0.520103	0.7054		4068	0.0075126	0.984004	0.99118		4068	-0.13845	0.711911	0.881966
NCU01355	0	48.7113	-1.06529	0.058728	0.105136		48.7113	-1.97326	0.000737299	0.00337058		48.7113	-2.21921	0.000213259	0.0012385	down	48.7113	-2.2643	0.000156326	0.00157473	down	48.7113	-1.64617	0.00297157	0.0136304		48.7113	-0.474912	0.388654	0.685911
NCU01356	0	103.742	1.42582	9.65199e-12	1.71924e-10		103.742	1.14596	6.77665e-08	1.02734e-06		103.742	0.587617	0.00930157	0.0282823		103.742	0.761228	0.000569282	0.00451099		103.742	0.979622	1.14818e-06	1.73483e-05		103.742	0.31258	0.161718	0.438727
NCU01357	0	39.6535	2.0381	0.000360722	0.00128124	up	39.6535	-0.624775	0.313377	0.435206		39.6535	-0.123304	0.839197	0.892411		39.6535	-0.313169	0.608837	0.774859		39.6535	-0.717803	0.22424	0.384716		39.6535	0.96862	0.0939549	0.327555
NCU01358	0	26.0713	-1.19903	0.0599904	0.107155		26.0713	-0.342082	0.566667	0.676221		26.0713	-0.467016	0.441539	0.564717		26.0713	0.134307	0.818771	0.905276		26.0713	-0.12842	0.821206	0.89646		26.0713	0.22088	0.701836	0.877775
NCU01360	0	1030.89	-0.539682	0.000144312	0.000574312		1030.89	0.175306	0.207479	0.320109		1030.89	0.171744	0.2184	0.334333		1030.89	0.191226	0.169843	0.347777		1030.89	0.253503	0.0637447	0.154579		1030.89	-0.0946051	0.496655	0.762542
NCU01361	0	284.085	-0.597634	0.00187158	0.00532363		284.085	-0.118818	0.524773	0.639875		284.085	-0.435	0.0229613	0.0583469		284.085	-0.274984	0.145815	0.313242		284.085	-0.266302	0.141082	0.275343		284.085	0.192125	0.293974	0.598954
NCU01362	0	423.91	-0.731125	1.15564e-05	6.16964e-05		423.91	-0.471988	0.00405082	0.0137765		423.91	-0.444455	0.00710308	0.0226985		423.91	-0.748264	7.52919e-06	0.000127246		423.91	-0.733594	4.37826e-06	5.56826e-05		423.91	-0.230024	0.154172	0.428104
NCU01364	0	133.948	-0.704479	0.000907021	0.00283588		133.948	0.619746	0.000677417	0.00313985		133.948	0.478616	0.0104107	0.0308307		133.948	0.232723	0.221026	0.415497		133.948	0.404104	0.0193581	0.060892		133.948	0.307505	0.0937216	0.327137
NCU01365	0	124.042	-1.03118	1.50286e-05	7.8017e-05		124.042	0.00261596	0.990296	0.994911		124.042	-0.675581	0.00345961	0.0126414		124.042	-0.252654	0.252754	0.453186		124.042	-0.224653	0.273207	0.441073		124.042	0.324595	0.118957	0.372166
NCU01366	0	367.94	-0.288595	0.144606	0.223871		367.94	0.0151811	0.9381	0.959818		367.94	0.0180385	0.926804	0.95245		367.94	-0.494886	0.0131705	0.0543984		367.94	-0.377945	0.0493489	0.127879		367.94	-0.198527	0.309553	0.613927
NCU01367	0	293.527	1.11913	0.0693976	0.120609		293.527	0.552012	0.371034	0.496529		293.527	0.517787	0.401702	0.528471		293.527	-0.780746	0.209048	0.401887		293.527	-0.608631	0.324046	0.494432		293.527	-1.63756	0.00874801	0.0769935
NCU01368	0	1214.03	0.193605	0.429931	0.546278		1214.03	0.244711	0.318069	0.440384		1214.03	0.288039	0.24024	0.36001		1214.03	0.484342	0.0479451	0.142224		1214.03	0.652707	0.0073841	0.0287408		1214.03	0.215904	0.377794	0.679072
NCU01369	0	4521.83	0.15016	0.676893	0.77204		4521.83	0.0318506	0.929571	0.952856		4521.83	0.173194	0.630795	0.730269		4521.83	-0.205936	0.567783	0.743651		4521.83	-0.180704	0.615885	0.751596		4521.83	-0.952211	0.00827707	0.0743038
NCU01370	0	46.4888	0.946025	0.00544661	0.0135781		46.4888	0.512163	0.14177	0.239829		46.4888	0.703615	0.0429771	0.0948501		46.4888	0.0111613	0.975727	0.990029		46.4888	0.371591	0.260385	0.425975		46.4888	0.133455	0.704916	0.879163
NCU01371	0	43.8639	0.101684	0.855189	0.909272		43.8639	0.749957	0.168185	0.273169		43.8639	-0.0232462	0.967021	0.980218		43.8639	0.77926	0.152894	0.324264		43.8639	0.548062	0.305187	0.475254		43.8639	0.233538	0.670323	0.859686
NCU01373	0	11.1199	2.30952	5.63929e-05	0.000253612	up	11.1199	0.0234596	0.972896	0.983353		11.1199	0.417463	0.53283	0.646935		11.1199	-0.755756	0.342959	0.550273		11.1199	0.676458	0.248338	0.412063		11.1199	0.869128	0.157227	0.432313
NCU01374	0	45.7385	-0.620078	0.181024	0.270633		45.7385	0.650415	0.128873	0.222483		45.7385	-0.306	0.501474	0.619648		45.7385	0.259096	0.554036	0.734611		45.7385	-0.0887875	0.833617	0.904011		45.7385	1.01987	0.0151746	0.109633
NCU01375	0	1.50943	-1.10019	0.563859	0.674506		1.50943	-0.160954	0.921112	1		1.50943	0.995004	0.494484	1		1.50943	0.539239	0.72144	1		1.50943	-1.28437	0.429377	1		1.50943	0.577375	0.692532	1
NCU01376	0	88.4548	-0.664152	0.0727165	0.125648		88.4548	1.30334	6.23904e-05	0.000418096		88.4548	1.77479	3.72154e-08	6.39975e-07		88.4548	0.710242	0.0339006	0.110279		88.4548	1.08381	0.000662127	0.00391474		88.4548	0.360439	0.282149	0.586038
NCU01377	0	61.5889	0.245304	0.400984	0.517805		61.5889	0.550328	0.0523212	0.109836		61.5889	0.397438	0.171119	0.27707		61.5889	0.0958631	0.746743	0.86414		61.5889	0.327211	0.225204	0.385772		61.5889	-0.155134	0.598491	0.823153
NCU01378	0	426.805	-1.25779	8.05317e-07	5.59228e-06		426.805	0.0373881	0.878572	0.917173		426.805	0.605687	0.0127023	0.0362412		426.805	0.42364	0.0819027	0.209965		426.805	0.284325	0.237357	0.399696		426.805	0.341272	0.159585	0.436163
NCU01379	0	1143.11	-0.344209	0.140338	0.21825		1143.11	-0.294004	0.207454	0.320109		1143.11	-0.290679	0.213164	0.327701		1143.11	-0.548029	0.01913	0.0723796		1143.11	-0.39523	0.0884162	0.197252		1143.11	-0.344385	0.139274	0.40783
NCU01380	0	673.722	1.28377	0.00289044	0.00781136		673.722	1.96906	4.62313e-06	4.31965e-05		673.722	2.41351	1.91894e-08	3.48285e-07	up	673.722	1.35688	0.00163587	0.0105399		673.722	2.03249	2.14993e-06	2.9739e-05	up	673.722	1.22337	0.00448661	0.0495819
NCU01381	0	828.757	0.784156	0.0392025	0.0744547		828.757	0.741094	0.0512934	0.108098		828.757	1.42489	0.000173655	0.00105061		828.757	1.14564	0.00255651	0.0152457		828.757	1.76437	3.12274e-06	4.15066e-05		828.757	0.735566	0.0528375	0.234824
NCU01382	0	168.927	1.4688	4.46758e-10	5.94923e-09		168.927	1.16963	7.94672e-07	9.40309e-06		168.927	0.140789	0.571373	0.680318		168.927	-0.247408	0.330063	0.537759		168.927	-0.0205655	0.930962	0.959847		168.927	-0.573905	0.0238135	0.146863
NCU01383	0	1.36775	1.63577	0.369765	0.484617		1.36775	2.55103	0.139961	1		1.36775	-1.32495	0.542037	1		1.36775	1.07761	0.573796	1		1.36775	-0.0831614	0.965172	1		1.36775	1.73119	0.330187	1
NCU01385	0	2.57929	-0.568706	0.6225	0.727845		2.57929	-4.37778	0.0113755	0.0323411	down	2.57929	-1.20547	0.341972	0.47022		2.57929	-1.83521	0.188905	1		2.57929	-1.26183	0.251423	0.415719		2.57929	-0.621528	0.580824	1
NCU01386	0	571.946	-1.63733	5.58308e-09	5.93814e-08		571.946	-1.80316	1.47997e-10	3.90491e-09		571.946	-2.25053	3.1255e-15	1.79392e-13	down	571.946	-1.34519	1.51154e-06	3.37969e-05		571.946	-1.41795	2.87663e-07	5.27042e-06		571.946	-0.237838	0.388523	0.685905
NCU01387	0	92.0276	-0.189	0.421997	0.538409		92.0276	-0.27096	0.250252	0.367928		92.0276	-0.254439	0.287404	0.413169		92.0276	0.0924304	0.687398	0.828189		92.0276	-0.0521218	0.806976	0.886189		92.0276	0.368927	0.0922481	0.323986
NCU01388	0	758.053	-0.0317771	0.804568	0.871995		758.053	0.153139	0.228662	0.344377		758.053	0.195727	0.125385	0.217822		758.053	0.037838	0.767901	0.875793		758.053	0.206017	0.095599	0.20823		758.053	0.0380872	0.763721	0.903365
NCU01389	0	132.291	0.0385461	0.869706	0.918755		132.291	-0.116849	0.62075	0.720621		132.291	-0.502263	0.0403814	0.0904768		132.291	-0.614975	0.0124778	0.0521345		132.291	-0.294956	0.192569	0.34332		132.291	0.0199862	0.931227	0.974708
NCU01390	0	234.161	-0.826097	4.18086e-06	2.49317e-05		234.161	-0.61955	0.000418884	0.0021073		234.161	-0.613252	0.000554706	0.00280655		234.161	-0.602392	0.000651028	0.00500451		234.161	-0.819623	8.62134e-07	1.38051e-05		234.161	0.132082	0.426551	0.713696
NCU01391	0	2720.8	-1.02926	0.00254294	0.00697452		2720.8	0.159803	0.638572	0.735994		2720.8	0.00451173	0.989424	0.993809		2720.8	-0.000571586	0.99866	1		2720.8	0.129073	0.704159	0.820034		2720.8	-0.716036	0.0354999	0.186736
NCU01392	0	0.209886	-0.910409	0.863094	0.914057		0.209886	-0.981029	0.852605	1		0.209886	-0.82599	0.875692	1		0.209886	-0.881079	0.867475	1		0.209886	-0.551104	0.916627	1		0.209886	0.30597	0.953692	1
NCU01393	0	190.768	0.445088	0.0106877	0.0242874		190.768	0.298241	0.0889051	0.167662		190.768	0.0617907	0.732615	0.812903		190.768	0.258047	0.145158	0.312147		190.768	0.411027	0.0124853	0.0431904		190.768	0.159378	0.360101	0.662828
NCU01394	0	24.622	-0.233303	0.678616	0.772991		24.622	-0.619611	0.28204	0.402678		24.622	-1.28193	0.0397114	0.0893152		24.622	0.126474	0.818786	0.905276		24.622	-0.112373	0.832191	0.903209		24.622	0.616527	0.247372	0.544919
NCU01395	0	936.433	2.27351	2.4265e-06	1.51388e-05	up	936.433	1.40492	0.00360878	0.012487		936.433	1.31948	0.0062865	0.0206183		936.433	0.358059	0.459387	0.653318		936.433	0.724146	0.133351	0.26422		936.433	-1.27174	0.00905719	0.0781374
NCU01396	0	0.773139	-2.05793	0.4302	0.546475		0.773139	-2.12852	0.414565	1		0.773139	0.469986	0.844817	1		0.773139	-0.591816	0.820349	1		0.773139	-3.25186	0.212589	1		0.773139	1.08345	0.636157	1
NCU01397	0	123.495	1.18218	3.17183e-05	0.000152207		123.495	0.823521	0.00414658	0.0140213		123.495	0.836375	0.00380272	0.0136787		123.495	0.546413	0.061552	0.170872		123.495	1.02247	0.000220966	0.00157637		123.495	0.999877	0.000410507	0.0101489
NCU01398	0	36.091	1.33831	0.1115	0.180827		36.091	-0.519027	0.550536	0.661796		36.091	0.888791	0.29356	0.419596		36.091	0.236253	0.782264	0.884417		36.091	-0.14761	0.861099	0.919789		36.091	0.649282	0.442013	0.72622
NCU01399	0	541.921	0.647496	0.00241485	0.00667095		541.921	-0.11836	0.583566	0.690791		541.921	0.028113	0.896415	0.932715		541.921	-0.350657	0.106996	0.252477		541.921	0.144075	0.496554	0.652549		541.921	0.261395	0.221187	0.514555
NCU01400	0	168.11	-1.0326	0.117131	0.18808		168.11	-1.8656	0.00497137	0.0163475		168.11	-0.714929	0.277165	0.401965		168.11	-0.749885	0.254284	0.455081		168.11	-1.56518	0.0170813	0.0551429		168.11	-1.16609	0.0764444	0.292239
NCU01401	0	152.718	-0.062562	0.799668	0.867906		152.718	0.10112	0.677968	0.76808		152.718	0.428664	0.0759445	0.148775		152.718	0.31844	0.188458	0.374108		152.718	0.170571	0.465263	0.626517		152.718	-0.350965	0.154211	0.428104
NCU01402	0	5.33298	0.182076	0.873308	0.921179		5.33298	-0.624939	0.610692	0.712125		5.33298	1.67291	0.112948	0.201362		5.33298	0.750598	0.494765	0.686303		5.33298	0.9224	0.374509	0.545712		5.33298	-1.85841	0.190421	0.478465
NCU01403	0	112.576	0.184217	0.443481	0.559724		112.576	0.973015	1.65455e-05	0.00013161		112.576	0.360884	0.130148	0.224201		112.576	0.896867	8.51982e-05	0.000970007		112.576	0.923211	1.9261e-05	0.000200528		112.576	0.309234	0.182953	0.469203
NCU01404	0	90.7339	1.56667	0.000192701	0.000741927		90.7339	1.22581	0.00369268	0.0127449		90.7339	0.45182	0.296243	0.422541		90.7339	0.732185	0.087168	0.218926		90.7339	0.697294	0.0954922	0.208113		90.7339	-0.104982	0.8094	0.927033
NCU01407	0	26.715	2.78687	2.01306e-05	0.000101213	up	26.715	-0.254651	0.732944	0.81113		26.715	3.20673	8.28586e-07	9.8307e-06	up	26.715	-0.788979	0.323588	0.53121		26.715	-1.17364	0.109381	0.229261		26.715	-0.513789	0.49221	0.760055
NCU01408	0	343.215	-0.0529924	0.819387	0.882367		343.215	0.437291	0.0556923	0.115069		343.215	0.366615	0.110624	0.198378		343.215	0.463259	0.0429962	0.131561		343.215	0.44969	0.0450512	0.11969		343.215	0.681333	0.00261616	0.0353713
NCU01409	0	653.271	-1.22212	3.98594e-05	0.000186508		653.271	-0.515247	0.0804294	0.155019		653.271	-0.586448	0.0470977	0.102008		653.271	-0.205203	0.48548	0.677606		653.271	-0.354391	0.225558	0.385901		653.271	0.0487105	0.867994	0.948138
NCU01410	0	246.326	-0.467084	0.0850792	0.144074		246.326	-0.877732	0.00134524	0.00553052		246.326	-1.06354	0.000122365	0.0007798		246.326	-1.42786	3.52629e-07	9.62556e-06		246.326	-1.17933	1.12894e-05	0.000125666		246.326	-0.319986	0.233745	0.528825
NCU01411	0	47.2474	-0.0108947	0.986274	0.99711		47.2474	-0.341106	0.593918	0.698555		47.2474	1.54047	0.0118182	0.0341264		47.2474	0.460954	0.460434	0.653675		47.2474	0.706014	0.246066	0.409226		47.2474	0.888788	0.147995	0.420836
NCU01412	0	1738.9	1.4178	0.000105344	0.000438918		1738.9	1.22232	0.000829838	0.00371766		1738.9	1.32882	0.000279426	0.00155434		1738.9	0.638723	0.0810715	0.208597		1738.9	1.00057	0.00616402	0.0248218		1738.9	0.0617713	0.866106	0.94716
NCU01413	0	15.8222	-0.850808	0.153536	0.235076		15.8222	-0.38387	0.495598	0.613958		15.8222	-0.403037	0.481678	0.601095		15.8222	-0.383658	0.499839	0.68959		15.8222	-0.768297	0.149031	0.286615		15.8222	0.00626218	0.990685	0.997718
NCU01414	0	1949.61	-0.0104471	0.956038	0.975792		1949.61	0.20174	0.28619	0.406628		1949.61	0.508819	0.00709484	0.0226804		1949.61	0.104438	0.581338	0.754352		1949.61	0.210353	0.263811	0.430165		1949.61	-0.0583446	0.75778	0.899777
NCU01416	0	7.36496	-2.60267	0.0635431	0.112143		7.36496	-1.86387	0.149619	0.250471		7.36496	-1.78564	0.170125	0.275914		7.36496	0.013124	0.991135	0.995045		7.36496	-1.20069	0.309308	0.479812		7.36496	-0.391128	0.741073	0.893286
NCU01417	0	277.078	-1.08532	0.0859225	0.145219		277.078	0.303199	0.628454	0.726892		277.078	-0.281642	0.654142	0.750904		277.078	0.163218	0.794659	0.891159		277.078	0.279866	0.654256	0.780592		277.078	0.505596	0.419099	0.708432
NCU01418	0	19653.3	-0.80153	0.00132268	0.00392908		19653.3	-0.688159	0.00583229	0.0186985		19653.3	-0.736332	0.00317985	0.0118444		19653.3	-0.721287	0.00385707	0.0209643		19653.3	-0.595462	0.0170085	0.0549635		19653.3	-0.373746	0.134215	0.399275
NCU01419	0	229.368	-0.307191	0.274104	0.38135		229.368	0.169273	0.540419	0.654172		229.368	0.0298381	0.914726	0.945381		229.368	0.35049	0.204048	0.395246		229.368	0.28177	0.298312	0.468344		229.368	0.057734	0.834141	0.935328
NCU01420	0	620.355	-1.64836	1.53934e-11	2.6295e-10		620.355	-0.599373	0.0121249	0.0340121		620.355	-1.07062	9.27148e-06	8.18688e-05		620.355	-0.555851	0.0200901	0.0754184		620.355	-0.544511	0.0211922	0.0653585		620.355	-0.123566	0.602236	0.824809
NCU01421	0	74.2762	0.920658	0.014608	0.0318227		74.2762	0.44169	0.247391	0.36499		74.2762	0.473486	0.217003	0.332597		74.2762	-0.345788	0.384816	0.589765		74.2762	-0.062478	0.867691	0.924039		74.2762	-0.292792	0.452556	0.734707
NCU01422	0	4279.04	-1.22998	0.00849595	0.0199796		4279.04	-1.0489	0.0247926	0.0606369		4279.04	-1.08834	0.0198738	0.0520795		4279.04	-0.795825	0.0885307	0.22103		4279.04	-0.885636	0.0579311	0.144309		4279.04	-1.32506	0.00457512	0.050367
NCU01423	0	233.311	-2.74713	0.00028747	0.00104961	down	233.311	-0.39489	0.572907	0.681368		233.311	-0.506592	0.471254	0.591356		233.311	3.52135	3.03782e-07	8.50525e-06	up	233.311	2.24226	0.00111132	0.00603375	up	233.311	0.23984	0.729733	0.889224
NCU01424	0	4876.07	-2.51283	0.000886113	0.00278231	down	4876.07	-2.64623	0.000463896	0.00231137	down	4876.07	-2.75264	0.000271387	0.00151822	down	4876.07	-3.75808	6.75414e-07	1.69402e-05	down	4876.07	-3.30969	1.19158e-05	0.000131327	down	4876.07	-2.22231	0.00327651	0.0407351	down
NCU01425	0	1488.87	-2.21564	9.762e-07	6.61125e-06	down	1488.87	-1.94963	1.60807e-05	0.000128514		1488.87	-2.56717	1.4927e-08	2.77097e-07	down	1488.87	-2.32096	2.95282e-07	8.29571e-06	down	1488.87	-2.54522	1.71559e-08	4.3954e-07	down	1488.87	0.255672	0.570271	0.806432
NCU01426	0	596.281	-3.51992	9.35067e-13	2.02334e-11	down	596.281	-2.54702	1.61823e-07	2.27401e-06	down	596.281	-3.43801	3.09576e-12	1.0773e-10	down	596.281	-2.1246	1.17782e-05	0.00018232	down	596.281	-2.6174	5.93039e-08	1.30916e-06	down	596.281	0.305174	0.525308	0.782892
NCU01427	0	1519.39	-1.59625	0.00883854	0.0206685		1519.39	-1.26511	0.0378687	0.0847611		1519.39	-1.07475	0.0777417	0.151498		1519.39	0.00170672	0.997763	0.999264		1519.39	-0.828139	0.173598	0.31881		1519.39	-1.29496	0.0335235	0.181008
NCU01428	0	1483.98	-0.226159	0.683382	0.776851		1483.98	-0.34683	0.531685	0.646344		1483.98	-0.390478	0.48143	0.601095		1483.98	-0.458575	0.408368	0.609768		1483.98	-0.634551	0.25222	0.416813		1483.98	-1.57226	0.00463442	0.0507426
NCU01429	0	4202.3	1.39561	0.000631771	0.00206983		4202.3	0.833749	0.0412292	0.0907206		4202.3	1.14433	0.00508118	0.017381		4202.3	0.457557	0.262772	0.464792		4202.3	0.641798	0.11598	0.239744		4202.3	-0.290803	0.476792	0.749035
NCU01430	0	264.981	-5.77192	1.15429e-07	9.69465e-07	down	264.981	-4.04346	0.000129128	0.000765499	down	264.981	-5.11353	1.92365e-06	2.09141e-05	down	264.981	-4.62444	1.39102e-05	0.00021191	down	264.981	-5.01548	1.99075e-06	2.77982e-05	down	264.981	-0.644741	0.536796	0.790083
NCU01431	0	1196.81	-0.818912	0.0002846	0.00104057		1196.81	-0.651762	0.00379293	0.0130298		1196.81	-0.510793	0.0232963	0.0589341		1196.81	-0.29068	0.195681	0.383777		1196.81	-0.34844	0.118631	0.243573		1196.81	-0.414302	0.0647531	0.265675
NCU01432	0	176.92	-2.46929	3.86228e-13	9.09392e-12	down	176.92	-2.39894	1.15916e-12	4.45471e-11	down	176.92	-2.22264	4.21998e-11	1.25169e-09	down	176.92	-1.71408	1.7712e-07	5.3588e-06		176.92	-1.69108	9.96828e-08	2.10285e-06		176.92	-0.806257	0.0110923	0.0896186
NCU01433	0	317.387	0.135729	0.540828	0.653481		317.387	-0.0856052	0.700983	0.786892		317.387	0.443657	0.0443661	0.0973628		317.387	-0.326878	0.147198	0.315429		317.387	-0.228043	0.29559	0.465531		317.387	0.100227	0.649335	0.85106
NCU01434	0	58.5716	0.0285289	0.922916	0.95305		58.5716	0.086464	0.766193	0.835169		58.5716	0.927997	0.000692489	0.00336314		58.5716	0.520623	0.0643706	0.176377		58.5716	0.787147	0.00220799	0.0107057		58.5716	-0.440472	0.142793	0.413748
NCU01435	0	273.565	-0.0234644	0.917349	0.948937		273.565	-0.21696	0.33926	0.463695		273.565	-0.127921	0.573966	0.682294		273.565	-0.419971	0.0673385	0.182087		273.565	-0.22079	0.317753	0.4882		273.565	-0.101809	0.650399	0.85168
NCU01436	0	1337.28	-0.623552	1.1458e-07	9.64023e-07		1337.28	-0.18126	0.11763	0.207651		1337.28	-0.24012	0.0392867	0.0886081		1337.28	-0.186048	0.109171	0.255865		1337.28	-0.219557	0.0532474	0.135596		1337.28	0.00599389	0.958347	0.985334
NCU01438	0	8544.47	0.595064	0.0582426	0.104456		8544.47	0.696225	0.0266925	0.0641476		8544.47	0.364721	0.245812	0.366582		8544.47	0.413711	0.18799	0.373519		8544.47	0.683341	0.02958	0.086318		8544.47	-0.586486	0.0621083	0.25788
NCU01439	0	6674.69	2.26772	0.000104582	0.000436312	up	6674.69	1.81011	0.00195723	0.00751846		6674.69	2.49313	1.99534e-05	0.000161954	up	6674.69	1.16615	0.0460757	0.13848		6674.69	1.38632	0.0176991	0.0566206		6674.69	-0.215928	0.711979	0.881966
NCU01440	0	2040.85	0.16914	0.205611	0.300544		2040.85	0.456081	0.000608895	0.0028889		2040.85	0.336457	0.0117165	0.0338771		2040.85	0.467766	0.000444384	0.00370142		2040.85	0.455542	0.000555393	0.00338327		2040.85	-0.0703098	0.598479	0.823153
NCU01441	0	561.092	1.07267	0.00642618	0.0156735		561.092	1.30009	0.000943321	0.00412569		561.092	0.98196	0.0126779	0.036195		561.092	0.863409	0.0284478	0.0967605		561.092	1.1004	0.00501704	0.0209215		561.092	0.41442	0.293265	0.598638
NCU01442	0	108.721	-0.909854	0.0135167	0.0297429		108.721	-0.393962	0.271654	0.391577		108.721	-0.762217	0.0378691	0.0863137		108.721	0.50654	0.147358	0.315694		108.721	0.181459	0.597899	0.737384		108.721	0.0548148	0.875775	0.952046
NCU01443	0	2075.86	1.37531	1.34354e-11	2.31985e-10		2075.86	1.04287	3.00142e-07	3.94199e-06		2075.86	1.10154	6.32769e-08	1.00414e-06		2075.86	1.02264	5.13307e-07	1.32587e-05		2075.86	1.12717	2.73264e-08	6.52805e-07		2075.86	0.0713101	0.727209	0.888438
NCU01444	0	957.467	-2.08605	0.000216657	0.000822265	down	957.467	-2.01648	0.000347888	0.00179823	down	957.467	-2.2615	6.16121e-05	0.000426126	down	957.467	-1.89034	0.000798574	0.00590642		957.467	-2.13261	0.000150653	0.00113137	down	957.467	-1.52477	0.00675571	0.0652424
NCU01445	0	218.203	0.0949329	0.565511	0.675975		218.203	-0.142671	0.393343	0.517915		218.203	-0.243513	0.153242	0.254558		218.203	-0.355896	0.0377808	0.119679		218.203	-0.378652	0.0171452	0.0552888		218.203	-0.24665	0.13643	0.403047
NCU01446	0	763.522	0.000151399	0.999355	1		763.522	0.578512	0.00177	0.00693791		763.522	0.657661	0.000384898	0.00204676		763.522	0.520352	0.00502498	0.0259899		763.522	0.691857	0.000153744	0.00115262		763.522	0.0417918	0.822173	0.931025
NCU01447	0	579.95	0.422044	0.0015411	0.00449355		579.95	-0.0848371	0.531526	0.646267		579.95	0.0987547	0.465802	0.586833		579.95	-0.305384	0.0266106	0.0920677		579.95	-0.0387566	0.766698	0.85946		579.95	-0.104179	0.438156	0.724122
NCU01448	0	0.0688861	0.0542801	0.991829	0.997555		0.0688861	-0.0162927	0.997548	1		0.0688861	0.138746	0.979118	1		0.0688861	0.0836569	0.987408	1		0.0688861	0.413632	0.937618	1		0.0688861	-0.2492	0.962503	1
NCU01449	0	1069.58	-0.435456	0.267116	0.373417		1069.58	0.0724519	0.853242	0.901807		1069.58	-0.106132	0.786616	0.853842		1069.58	-0.0750844	0.848079	0.922145		1069.58	-0.160387	0.681646	0.802914		1069.58	0.651644	0.095612	0.33133
NCU01450	0	0.0705971	-0.556772	0.916183	0.948251		0.0705971	-0.627327	0.905617	1		0.0705971	-0.472288	0.928871	1		0.0705971	-0.527377	0.9206	1		0.0705971	-1.75066	0.74073	1		0.0705971	-0.860234	0.870841	1
NCU01451	0	1860.58	-2.17134	4.63096e-08	4.17483e-07	down	1860.58	-1.85998	2.7743e-06	2.76772e-05		1860.58	-1.55984	8.42136e-05	0.000562208		1860.58	-2.0962	1.3154e-07	4.20005e-06	down	1860.58	-2.12275	8.38908e-08	1.78677e-06	down	1860.58	-0.596183	0.132027	0.396127
NCU01452	0	18956.1	0.835624	0.000734544	0.00236292		18956.1	0.431553	0.0812433	0.155993		18956.1	0.602985	0.0148451	0.0411722		18956.1	-0.0894	0.718033	0.847561		18956.1	0.136317	0.581734	0.725035		18956.1	-0.107903	0.662919	0.856666
NCU01453	0	331.228	-0.80925	0.000184583	0.000712674		331.228	-0.201476	0.338773	0.463249		331.228	-0.0432844	0.837141	0.890968		331.228	-0.155271	0.461726	0.655014		331.228	-0.0425217	0.835472	0.905103		331.228	0.173546	0.402255	0.695169
NCU01454	0	943.882	0.907632	0.00860237	0.0201803		943.882	0.640675	0.0638278	0.128686		943.882	1.11663	0.00122185	0.00541009		943.882	0.783389	0.0234129	0.0841684		943.882	0.622271	0.0710283	0.167687		943.882	-0.465935	0.179608	0.464895
NCU01455	0	542.118	0.771403	0.0019767	0.00559443		542.118	1.01009	4.7971e-05	0.0003323		542.118	0.996055	6.29372e-05	0.000433257		542.118	0.813841	0.00109652	0.00759663		542.118	0.95923	9.97069e-05	0.000799011		542.118	0.098438	0.694559	0.873526
NCU01456	0	491.73	-0.699017	0.025046	0.0508723		491.73	-1.72805	4.42572e-08	6.97308e-07		491.73	-1.49641	2.079e-06	2.22743e-05		491.73	-1.48069	2.58842e-06	5.20875e-05		491.73	-1.73799	2.42968e-08	5.88553e-07		491.73	-0.883109	0.0046017	0.0505311
NCU01457	0	122.49	1.41224	0.00508087	0.0127361		122.49	-0.0935277	0.854892	0.902897		122.49	0.305387	0.548981	0.661096		122.49	-0.941093	0.0714176	0.189563		122.49	-0.673341	0.184809	0.333857		122.49	-1.21324	0.0199104	0.130816
NCU01458	0	63.2777	1.74034	0.00949919	0.0219563		63.2777	0.569072	0.401831	0.526666		63.2777	1.22425	0.0695264	0.138629		63.2777	-0.410014	0.554986	0.735082		63.2777	-0.221709	0.742867	0.844528		63.2777	-0.797198	0.251883	0.550259
NCU01459	0	1158.43	-2.03911	8.74269e-06	4.80672e-05	down	1158.43	-1.79789	8.66555e-05	0.000549855		1158.43	-1.04261	0.0225796	0.0575659		1158.43	-0.637227	0.162971	0.337528		1158.43	-1.39209	0.00228835	0.0110227		1158.43	-0.689233	0.131121	0.395053
NCU01460	0	468.82	0.176969	0.533654	0.646688		468.82	0.00601716	0.983138	0.990534		468.82	0.888909	0.00165026	0.00691965		468.82	0.444435	0.116981	0.268855		468.82	0.292467	0.298309	0.468344		468.82	-0.539782	0.0591513	0.250147
NCU01461	0	424.529	0.506388	0.0128661	0.0284944		424.529	0.496361	0.0146197	0.0397488		424.529	1.07538	9.40375e-08	1.40643e-06		424.529	0.280783	0.170766	0.349076		424.529	0.28733	0.150679	0.288967		424.529	0.398625	0.0491686	0.225109
NCU01462	0	3.69405	3.67123	0.00322998	0.00861237	up	3.69405	0.529912	0.710513	0.794362		3.69405	0.742066	0.601291	0.705069		3.69405	-2.73481	0.14778	0.316441		3.69405	-1.51616	0.340421	0.510516		3.69405	-3.06767	0.104463	0.347458
NCU01463	0	21.5556	0.172843	0.702535	0.792207		21.5556	1.24256	0.00204778	0.00782886		21.5556	0.604278	0.163676	0.267684		21.5556	0.745318	0.0793444	0.205228		21.5556	0.721331	0.0628765	0.153484		21.5556	-0.248667	0.588666	0.817715
NCU01464	0	267.389	-0.831594	1.65111e-05	8.48398e-05		267.389	-0.644671	0.000689669	0.00318495		267.389	-0.576901	0.00251634	0.0098199		267.389	-0.299031	0.110558	0.257789		267.389	-0.476902	0.00813281	0.0309586		267.389	0.11956	0.510646	0.772352
NCU01465	0	675.049	-1.10624	2.45196e-05	0.000120679		675.049	-0.954405	0.000261466	0.00140402		675.049	-0.974393	0.000200157	0.00118182		675.049	-1.10825	2.38943e-05	0.000336739		675.049	-0.907872	0.000451767	0.00283405		675.049	-0.336654	0.194225	0.482801
NCU01466	0	143.226	0.447319	0.053648	0.0974614		143.226	0.535035	0.0200288	0.0511217		143.226	0.58658	0.0111659	0.0326422		143.226	-0.310872	0.20256	0.393701		143.226	0.0926136	0.679443	0.800882		143.226	-0.0268805	0.908533	0.966265
NCU01467	0	1130.78	-0.310142	0.00198641	0.00561692		1130.78	0.138728	0.156589	0.258853		1130.78	0.0934414	0.343982	0.472204		1130.78	-0.00296499	0.976088	0.990099		1130.78	0.171339	0.0707429	0.167192		1130.78	0.372347	0.000111741	0.00390021
NCU01468	0	974.609	0.877439	0.00608592	0.0149312		974.609	0.49815	0.119847	0.21056		974.609	0.676312	0.0346903	0.0806879		974.609	0.635237	0.0472759	0.140948		974.609	0.673641	0.0347392	0.0977274		974.609	0.21108	0.509948	0.772225
NCU01469	0	133.686	1.55982	2.98279e-09	3.35494e-08		133.686	0.846247	0.00164528	0.00652428		133.686	0.835342	0.00203578	0.00823913		133.686	0.622375	0.022545	0.0819672		133.686	0.705389	0.00681808	0.0269281		133.686	0.32319	0.235454	0.530707
NCU01470	0	1326.9	-1.11359	0.000557809	0.00187222		1326.9	-0.13124	0.682696	0.772051		1326.9	-0.523312	0.103837	0.189046		1326.9	0.0318513	0.920954	0.964367		1326.9	0.0437707	0.891254	0.937908		1326.9	0.156981	0.624372	0.837289
NCU01471	0	587.999	-0.358172	0.0817042	0.139071		587.999	-0.0389105	0.848835	0.898438		587.999	-0.0107905	0.957941	0.974113		587.999	-0.0727441	0.722223	0.849921		587.999	-0.129741	0.519566	0.672954		587.999	-0.0841538	0.679213	0.86428
NCU01472	0	35.0563	-1.21779	0.0329802	0.0642221		35.0563	-1.58611	0.00644055	0.0203587		35.0563	-0.323013	0.556924	0.668203		35.0563	-0.994023	0.0784893	0.203588		35.0563	-0.977245	0.0702166	0.166081		35.0563	-1.40175	0.0134707	0.100677
NCU01473	0	560.395	1.18455	0.00367649	0.00962618		560.395	0.984059	0.0158702	0.0425339		560.395	1.17571	0.00395097	0.0141268		560.395	0.373283	0.36187	0.567772		560.395	0.715586	0.0787291	0.180938		560.395	-0.259044	0.527729	0.784164
NCU01474	0	652.014	1.10701	0.00731203	0.0174956		652.014	1.11925	0.00667673	0.0209796		652.014	0.806528	0.0509672	0.108345		652.014	0.385863	0.35117	0.558079		652.014	0.571895	0.165195	0.30831		652.014	-0.254577	0.539157	0.791941
NCU01475	0	208.523	-1.67849	0.000228634	0.000862257		208.523	-1.77016	0.000102486	0.000630829		208.523	-1.67138	0.000248073	0.00140559		208.523	-1.64127	0.000313406	0.0027588		208.523	-1.762	8.73137e-05	0.000714598		208.523	-0.726217	0.105446	0.349188
NCU01476	0	325.629	-2.20387	1.44217e-16	5.65054e-15	down	325.629	-2.11787	1.3124e-15	8.0558e-14	down	325.629	-1.79342	9.36764e-12	3.03299e-10		325.629	-1.47724	1.30104e-08	5.51859e-07		325.629	-1.57171	5.72953e-10	2.01766e-08		325.629	-0.846528	0.000869169	0.0171319
NCU01477	0	1841.47	-2.07794	7.29187e-16	2.55029e-14	down	1841.47	-2.39632	1.65979e-20	1.9053e-18	down	1841.47	-2.25861	2.17702e-18	1.96354e-16	down	1841.47	-1.88101	2.67245e-13	3.12296e-11		1841.47	-2.06662	6.95996e-16	6.27746e-14	down	1841.47	-0.836905	0.00106848	0.0200031
NCU01478	0	1058.62	-1.51602	3.85994e-08	3.52956e-07		1058.62	-1.38211	5.13207e-07	6.42526e-06		1058.62	-1.58679	9.24282e-09	1.77218e-07		1058.62	-0.723663	0.00828412	0.0385183		1058.62	-0.966293	0.000398648	0.00256639		1058.62	-0.376938	0.167634	0.446595
NCU01479	0	1829.49	-0.2788	0.473277	0.589168		1829.49	0.00118589	0.997565	0.999034		1829.49	-0.484811	0.212664	0.327501		1829.49	0.029285	0.939922	0.972751		1829.49	0.218221	0.573809	0.71897		1829.49	0.0752592	0.846337	0.939374
NCU01480	0	86.2009	-0.734216	0.00119718	0.00360433		86.2009	-0.695524	0.00182274	0.00709121		86.2009	-0.441231	0.0449593	0.098414		86.2009	-0.0586954	0.77833	0.881543		86.2009	-0.206656	0.27707	0.444872		86.2009	-0.176256	0.38718	0.685905
NCU01481	0	193.523	0.370232	0.173014	0.260283		193.523	-0.147773	0.591454	0.696862		193.523	-0.138087	0.61775	0.71965		193.523	-0.00399568	0.988402	0.993426		193.523	0.00953559	0.971547	0.983227		193.523	-0.256469	0.349616	0.653397
NCU01483	0	496.794	-0.774531	0.00366996	0.00962002		496.794	-1.26708	2.40834e-06	2.45245e-05		496.794	-1.78268	7.06889e-11	2.02863e-09		496.794	-1.00633	0.000171503	0.00169796		496.794	-1.13375	1.73828e-05	0.000184229		496.794	0.443204	0.0914293	0.32265
NCU01484	0	6135.13	-0.372091	0.00716729	0.0172054		6135.13	-0.633627	4.77076e-06	4.4434e-05		6135.13	-0.190208	0.169081	0.274663		6135.13	-0.0240457	0.861866	0.930122		6135.13	-0.118712	0.388961	0.558812		6135.13	-0.160805	0.244264	0.54126
NCU01485	0	497.573	1.34885	0.00418268	0.0107662		497.573	1.51324	0.0013039	0.00538561		497.573	1.32998	0.00475656	0.0164103		497.573	0.612856	0.194481	0.382291		497.573	0.925679	0.0489561	0.127197		497.573	-0.341763	0.471081	0.745206
NCU01486	0	316.99	0.990831	0.00424026	0.010891		316.99	0.0909996	0.794542	0.8574		316.99	0.614948	0.077133	0.150636		316.99	0.0731635	0.834411	0.915281		316.99	0.367339	0.287327	0.456071		316.99	-0.192942	0.581097	0.813613
NCU01487	0	7574.32	-1.46469	3.14172e-05	0.000150989		7574.32	-0.781473	0.0262279	0.0633238		7574.32	-0.0147583	0.966503	0.979917		7574.32	0.552361	0.115912	0.266964		7574.32	0.299195	0.394331	0.563904		7574.32	0.0543332	0.877107	0.952511
NCU01488	0	31.6488	-1.68249	0.000179287	0.00069531		31.6488	-0.106274	0.757197	0.828838		31.6488	-0.55604	0.135247	0.231227		31.6488	0.241149	0.471115	0.663906		31.6488	0.139154	0.65018	0.778169		31.6488	0.00586837	0.985872	0.995768
NCU01489	0	1127.12	0.139555	0.408062	0.524753		1127.12	0.241999	0.150477	0.251297		1127.12	0.172444	0.307006	0.433209		1127.12	0.040006	0.812874	0.901653		1127.12	0.158723	0.341124	0.510703		1127.12	-0.157897	0.349219	0.652937
NCU01490	0	62.0893	0.598979	0.0951255	0.158482		62.0893	0.758547	0.0321378	0.0742858		62.0893	1.00032	0.00451984	0.01574		62.0893	1.27173	0.000244973	0.00224313		62.0893	1.27886	0.000128514	0.000984895		62.0893	0.181477	0.615775	0.831638
NCU01491	0	121.049	-0.539415	0.0543084	0.0984559		121.049	-0.272909	0.320292	0.443115		121.049	-0.0298331	0.913062	0.944551		121.049	0.2171	0.420109	0.61936		121.049	-0.269188	0.304883	0.474865		121.049	0.0613175	0.818568	0.928927
NCU01493	0	73.6409	-0.569993	0.252057	0.355477		73.6409	0.170755	0.722204	0.803671		73.6409	1.79561	0.00011277	0.000728103		73.6409	0.115448	0.811049	0.900553		73.6409	0.0560929	0.904666	0.944971		73.6409	1.15218	0.0135629	0.10116
NCU01494	0	31.3549	0.657056	0.26664	0.372806		31.3549	-0.865587	0.16573	0.270325		31.3549	-0.426552	0.488178	0.60749		31.3549	-1.28404	0.0468008	0.139837		31.3549	-0.205119	0.726994	0.833342		31.3549	-0.702112	0.251429	0.550092
NCU01495	0	2.97398	2.48675	0.0266326	0.0535526		2.97398	1.99796	0.0809759	0.155698		2.97398	0.846514	0.505551	0.623144		2.97398	-1.22355	0.491453	0.683249		2.97398	-0.111349	0.927906	0.958585		2.97398	-1.56953	0.374445	0.67572
NCU01496	0	27.6034	2.02262	7.92623e-06	4.42546e-05	up	27.6034	1.69497	0.000225663	0.00123202		27.6034	2.82997	1.13138e-10	3.14473e-09	up	27.6034	0.587958	0.249125	0.448699		27.6034	1.18077	0.00800216	0.030593		27.6034	-0.543958	0.339525	0.644523
NCU01498	0	2388.07	-1.07965	0.000869139	0.00273979		2388.07	-1.0242	0.00157881	0.00630853		2388.07	-0.9616	0.00301724	0.011368		2388.07	-0.212844	0.510802	0.698366		2388.07	-0.611038	0.0588048	0.146004		2388.07	-0.820951	0.0112395	0.0899188
NCU01499	0	396.931	-1.67226	6.60819e-06	3.75316e-05		396.931	-1.29034	0.000466486	0.00231905		396.931	-1.49014	5.78244e-05	0.000405		396.931	-0.916646	0.0126433	0.0527496		396.931	-1.19047	0.00110737	0.006016		396.931	-0.334264	0.359835	0.662479
NCU01500	0	195.605	0.73884	0.00242257	0.00668456		195.605	0.578081	0.0179671	0.046723		195.605	0.0402924	0.872432	0.917154		195.605	0.108603	0.663369	0.810982		195.605	0.2257	0.346434	0.516085		195.605	0.333903	0.171818	0.452585
NCU01501	0	320.682	0.654578	0.118476	0.189764		320.682	-0.105894	0.801441	0.862528		320.682	-0.0353933	0.933057	0.95689		320.682	-0.85057	0.0452458	0.136892		320.682	-0.589903	0.159556	0.300323		320.682	-0.728965	0.0844849	0.309242
NCU01502	0	109.295	0.959091	0.22575	0.324781		109.295	0.314784	0.691643	0.778781		109.295	0.220155	0.781766	0.850313		109.295	-1.04915	0.191777	0.378696		109.295	-0.81065	0.307063	0.477001		109.295	-1.61625	0.0450784	0.214556
NCU01503	0	346.452	1.07079	0.0245512	0.0500157		346.452	0.238816	0.617069	0.717385		346.452	0.243733	0.610106	0.71323		346.452	-1.15254	0.017163	0.0668972		346.452	-0.742502	0.119806	0.245132		346.452	-0.855861	0.0747842	0.288372
NCU01504	0	1960.64	-2.19268	0.0258625	0.0523311		1960.64	-2.56222	0.00922887	0.0272549	down	1960.64	-2.89001	0.00332759	0.0122706	down	1960.64	-4.03471	4.23734e-05	0.000551364	down	1960.64	-3.64873	0.0002093	0.00150529	down	1960.64	-4.05515	3.84678e-05	0.00172468	down
NCU01505	0	7.96552	0.507071	0.491568	0.606658		7.96552	-0.785575	0.34731	0.472216		7.96552	-0.260418	0.744254	0.822548		7.96552	-2.04463	0.0537968	0.155116		7.96552	0.863872	0.206095	0.361014		7.96552	-0.164337	0.828773	0.933894
NCU01506	0	54.7081	0.583649	0.213234	0.310314		54.7081	-0.456301	0.343862	0.468609		54.7081	-0.285122	0.553926	0.665238		54.7081	-1.45385	0.00445728	0.0235895		54.7081	-1.75199	0.000307095	0.00207932		54.7081	-0.834413	0.0852379	0.310736
NCU01509	0	1237.58	-2.50506	1.90865e-07	1.52422e-06	down	1237.58	-2.33039	1.23976e-06	1.37321e-05	down	1237.58	-2.59038	7.38577e-08	1.13932e-06	down	1237.58	-1.90256	7.40387e-05	0.000868099		1237.58	-2.4356	3.7608e-07	6.68847e-06	down	1237.58	-1.19509	0.0126209	0.0965581
NCU01510	0	1004.59	-2.97204	4.02606e-09	4.36445e-08	down	1004.59	-1.73321	0.000558624	0.00268937		1004.59	-1.99977	6.99743e-05	0.00047724		1004.59	-1.09527	0.0289993	0.0981349		1004.59	-1.83447	0.000252241	0.00175694		1004.59	-1.59574	0.00147211	0.0244804
NCU01511	0	690.835	1.68062	7.28741e-11	1.11916e-09		690.835	1.1992	3.56193e-06	3.44463e-05		690.835	1.27972	7.65715e-07	9.18339e-06		690.835	0.865496	0.000860368	0.00625085		690.835	0.950933	0.000220168	0.00157321		690.835	0.0762548	0.770298	0.906486
NCU01512	0	281.452	0.0996682	0.744481	0.825449		281.452	0.182593	0.549381	0.661037		281.452	0.107982	0.724388	0.806101		281.452	0.189697	0.534579	0.717792		281.452	0.43848	0.144383	0.279931		281.452	0.179524	0.554682	0.799457
NCU01514	0	98.5586	1.00811	0.0136802	0.0300386		98.5586	0.210303	0.612093	0.712912		98.5586	0.644772	0.117692	0.207931		98.5586	-0.813379	0.0594436	0.166515		98.5586	-0.643508	0.118517	0.243564		98.5586	-0.764864	0.0715155	0.281029
NCU01515	0	475.285	0.748353	0.000437985	0.00152283		475.285	0.635431	0.00285181	0.0103562		475.285	0.606841	0.00451209	0.0157265		475.285	0.162409	0.450993	0.646528		475.285	0.35771	0.0895706	0.199274		475.285	-0.259145	0.230142	0.523094
NCU01516	0	378.086	1.80465	0.0010297	0.00316677		378.086	1.19993	0.0292983	0.0689844		378.086	1.26857	0.0212487	0.054944		378.086	0.200225	0.71744	0.84751		378.086	0.718132	0.191417	0.342012		378.086	0.273838	0.619861	0.834192
NCU01517	0	1714.65	-1.94553	9.9931e-11	1.501e-09		1714.65	-2.11351	2.3042e-12	8.41606e-11	down	1714.65	-0.490869	0.098269	0.180921		1714.65	-1.21298	4.79374e-05	0.000610003		1714.65	-1.58646	8.86299e-08	1.88317e-06		1714.65	2.61134	7.75351e-19	7.45457e-16	up
NCU01519	0	0.261897	1.55886	0.768289	0.844051		0.261897	1.53043	0.772178	1		0.261897	0.13876	0.979116	1		0.261897	0.083671	0.987406	1		0.261897	-1.13961	0.829774	1		0.261897	1.16485	0.825919	1
NCU01520	0	27.7386	-1.62807	0.0196171	0.0411088		27.7386	-1.82442	0.00954929	0.0280233		27.7386	-3.00227	0.000203366	0.00119678	down	27.7386	-0.924882	0.168522	0.345899		27.7386	-1.12586	0.0826922	0.1878		27.7386	0.447713	0.484311	0.753054
NCU01521	0	35.3455	0.426378	0.229615	0.329106		35.3455	1.29178	0.000101444	0.000627015		35.3455	-0.790773	0.0577545	0.119835		35.3455	-0.151346	0.688991	0.829185		35.3455	-0.845152	0.0180678	0.0574879		35.3455	0.465078	0.17777	0.461935
NCU01522	0	140.731	0.950172	7.29156e-05	0.000318557		140.731	-0.120254	0.63108	0.72907		140.731	-0.107262	0.671078	0.763601		140.731	-0.208643	0.410153	0.611706		140.731	-0.0661025	0.78146	0.869662		140.731	-0.126096	0.610117	0.829066
NCU01523	0	1668.88	0.081245	0.709927	0.797472		1668.88	-0.0419128	0.847881	0.897535		1668.88	-0.0524189	0.810586	0.872123		1668.88	0.156874	0.47252	0.665373		1668.88	0.0985876	0.65025	0.778169		1668.88	-0.352144	0.107191	0.352453
NCU01524	0	226.439	1.73602	0.0026312	0.00719189		226.439	0.786759	0.174237	0.280485		226.439	1.14792	0.0472191	0.102196		226.439	-0.482049	0.410302	0.611706		226.439	-0.137874	0.811632	0.889304		226.439	-0.83254	0.155124	0.428847
NCU01525	0	355.11	-0.478903	0.00398394	0.0103155		355.11	-0.0845602	0.601483	0.705201		355.11	-0.640522	0.000153894	0.000944632		355.11	0.491781	0.00192137	0.0120651		355.11	0.153261	0.321287	0.491473		355.11	0.176177	0.266157	0.567395
NCU01526	0	18.5694	-0.564873	0.49747	0.612049		18.5694	-0.899816	0.286025	0.406525		18.5694	-1.8921	0.0391929	0.088419		18.5694	-0.430807	0.603183	0.770496		18.5694	-0.735905	0.360527	0.530498		18.5694	0.88723	0.263686	0.56491
NCU01527	0	227.815	0.593395	0.0351225	0.0678723		227.815	0.667649	0.0174256	0.045664		227.815	0.847696	0.00252387	0.00984105		227.815	0.294104	0.300204	0.506297		227.815	0.37195	0.179769	0.32722		227.815	-0.523434	0.0694119	0.277167
NCU01528	0	127625	-1.11785	0.000324893	0.0011674		127625	-0.457081	0.141597	0.23963		127625	-0.821769	0.00822839	0.0256999		127625	0.166035	0.593381	0.763158		127625	0.00867267	0.977749	0.987123		127625	0.417075	0.179833	0.464948
NCU01529	0	38.932	-3.03352	3.14406e-05	0.000151025	down	38.932	-1.89451	0.00353375	0.0122778		38.932	-1.46673	0.0215559	0.0555164		38.932	-0.0318889	0.957783	0.981838		38.932	-0.774739	0.194127	0.345364		38.932	0.161867	0.785995	0.916185
NCU01530	0	12.4512	-1.26442	0.170605	0.257182		12.4512	-2.7909	0.0102557	0.029702	down	12.4512	-0.961262	0.289848	0.415701		12.4512	0.69081	0.412826	0.613567		12.4512	-0.838425	0.324305	0.494667		12.4512	-0.714792	0.414346	0.704588
NCU01531	0	1.61574	2.3692	0.0864017	0.145901		1.61574	1.06106	0.485555	1		1.61574	1.98484	0.162953	1		1.61574	0.598299	0.713264	1		1.61574	-3.06765	0.110348	1		1.61574	-2.17721	0.257138	1
NCU01532	0	1.88805	3.27316	0.174185	0.261796		1.88805	5.70676	0.0105255	0.030364	up	1.88805	4.90914	0.0303907	0.0726291		1.88805	2.25766	0.388522	1		1.88805	3.41976	0.133572	0.26454		1.88805	0	1	1
NCU01534	0	375.243	-0.38519	0.032797	0.0639589		375.243	-0.129373	0.467503	0.588809		375.243	-0.238042	0.185894	0.295048		375.243	-0.114003	0.523305	0.707857		375.243	-0.179387	0.299718	0.469635		375.243	-0.173489	0.326676	0.632802
NCU01535	0	664.419	-0.787745	1.33783e-05	7.03916e-05		664.419	-0.848429	2.73025e-06	2.73304e-05		664.419	-0.811287	7.81669e-06	7.11552e-05		664.419	-0.346841	0.0528329	0.152846		664.419	-0.587909	0.000860535	0.0048483		664.419	-0.374551	0.0354499	0.186646
NCU01539	0	544.591	-0.155028	0.472578	0.58845		544.591	-0.050275	0.815169	0.873155		544.591	0.252511	0.239045	0.358754		544.591	0.236066	0.270697	0.473966		544.591	0.292151	0.166575	0.310362		544.591	-0.0712607	0.739417	0.89223
NCU01540	0	1001.42	-1.11059	8.89577e-14	2.31025e-12		1001.42	-0.942129	1.87505e-10	4.83246e-09		1001.42	-0.825668	2.43342e-08	4.30896e-07		1001.42	-0.517369	0.000418134	0.00352643		1001.42	-0.649727	6.45637e-06	7.80683e-05		1001.42	-0.159054	0.271923	0.573487
NCU01541	0	103.691	1.18185	0.00121826	0.00366319		103.691	0.221149	0.554783	0.665453		103.691	0.66563	0.0726876	0.143765		103.691	0.750909	0.0420589	0.129745		103.691	0.598632	0.0979007	0.211337		103.691	-0.668445	0.0828612	0.305756
NCU01542	0	446.643	-1.05174	0.00715119	0.0171754		446.643	-0.734854	0.0593637	0.121042		446.643	-0.736351	0.0591524	0.122072		446.643	-0.654939	0.0929079	0.228975		446.643	-0.734396	0.0580389	0.144453		446.643	-0.961832	0.0135862	0.10116
NCU01543	0	1680.08	-1.44	1.85999e-10	2.66831e-09		1680.08	-1.25398	2.66994e-08	4.40985e-07		1680.08	-0.99349	1.03259e-05	9.01884e-05		1680.08	-0.756809	0.000761697	0.00568803		1680.08	-0.897399	6.05506e-05	0.00052626		1680.08	-0.3344	0.135467	0.401436
NCU01545	0	3378.63	-0.253757	0.251321	0.354691		3378.63	-0.319517	0.148618	0.249078		3378.63	-0.196306	0.374887	0.502446		3378.63	-0.145223	0.5114	0.698413		3378.63	-0.284468	0.197356	0.350146		3378.63	-0.0288469	0.896105	0.961081
NCU01546	0	13190.6	-1.88409	3.07827e-07	2.34305e-06		13190.6	-1.2104	0.00100309	0.00432293		13190.6	-0.897094	0.0147565	0.0409913		13190.6	-0.419884	0.25369	0.454394		13190.6	-0.595603	0.105357	0.222947		13190.6	0.00231732	0.994973	0.999014
NCU01547	0	1240.37	0.246323	0.189853	0.281635		1240.37	0.291204	0.120748	0.21177		1240.37	0.258172	0.169749	0.275558		1240.37	0.352263	0.0606059	0.168951		1240.37	0.490528	0.00838932	0.0316626		1240.37	-0.0290581	0.877057	0.952511
NCU01548	0	1473.67	-0.34262	0.0758245	0.130274		1473.67	-0.0898426	0.640479	0.737331		1473.67	-0.185951	0.334875	0.463073		1473.67	0.249857	0.193116	0.380212		1473.67	0.0718805	0.706553	0.821416		1473.67	0.276899	0.148263	0.420902
NCU01549	0	614.475	-1.19011	4.73757e-16	1.73283e-14		614.475	-0.376245	0.00714451	0.0221658		614.475	-0.34389	0.0144324	0.0402738		614.475	-0.196643	0.15837	0.331249		614.475	-0.254942	0.0590697	0.146497		614.475	0.0125626	0.92692	0.973024
NCU01550	0	1728.68	1.26001	0.000154504	0.000607306		1728.68	0.823414	0.0134686	0.0371216		1728.68	0.946266	0.00451604	0.0157341		1728.68	0.160365	0.630968	0.788528		1728.68	0.565639	0.089203	0.198706		1728.68	-0.419727	0.209051	0.500115
NCU01551	0	249.192	-0.691899	0.00221967	0.00619788		249.192	-1.37242	4.06778e-09	7.96102e-08		249.192	-1.73346	7.78399e-13	3.0579e-11		249.192	-0.499579	0.0261845	0.090848		249.192	-0.912339	3.18285e-05	0.000306796		249.192	0.203681	0.350688	0.653425
NCU01552	0	9924	0.792787	0.000705128	0.00228054		9924	0.271448	0.246236	0.363899		9924	0.518583	0.0267339	0.0656573		9924	-0.161558	0.490335	0.682242		9924	0.0848168	0.716973	0.827867		9924	-0.0780574	0.738829	0.891977
NCU01553	0	59.067	0.748735	0.0150664	0.0326803		59.067	0.957556	0.00152589	0.00614458		59.067	0.892318	0.00361795	0.0131223		59.067	0.81168	0.00824503	0.0384119		59.067	0.528093	0.0697005	0.165347		59.067	0.463085	0.132227	0.396314
NCU01554	0	295.883	0.352188	0.0886325	0.14909		295.883	0.368172	0.0743034	0.145431		295.883	0.52859	0.0103758	0.0307448		295.883	0.0176121	0.93305	0.969399		295.883	0.203611	0.312775	0.48316		295.883	-0.126462	0.543429	0.794172
NCU01555	0	1299.01	-1.86535	1.15186e-15	3.97061e-14		1299.01	-0.768235	0.000808839	0.0036439		1299.01	-0.263561	0.249171	0.370966		1299.01	-0.175018	0.443705	0.639906		1299.01	-0.333011	0.143127	0.278152		1299.01	-0.210651	0.355783	0.658382
NCU01559	0	585.745	-1.18158	5.31933e-07	3.85883e-06		585.745	-1.80261	4.25577e-14	2.08982e-12		585.745	-1.19615	4.05527e-07	5.22076e-06		585.745	-1.4014	3.28426e-09	1.6147e-07		585.745	-1.5921	8.14104e-12	4.13556e-10		585.745	-0.309637	0.181948	0.467874
NCU01560	0	830.817	-0.763144	4.1893e-07	3.09053e-06		830.817	-1.8448	4.22163e-32	1.69613e-29		830.817	-1.33635	4.08329e-18	3.57348e-16		830.817	-1.51611	1.19103e-22	6.06233e-20		830.817	-1.39158	9.63962e-21	1.9815e-18		830.817	-0.155262	0.294683	0.59911
NCU01561	0	4.57742	4.85901	0.00156341	0.00454927	up	4.57742	1.17017	0.496617	0.614792		4.57742	2.22496	0.172366	0.278781		4.57742	0.587697	0.748436	0.864879		4.57742	0.475939	0.775866	0.866332		4.57742	-0.709394	0.732434	0.890009
NCU01562	0	3.93417	4.16099	0.000722988	0.00233122	up	3.93417	-0.36666	0.842816	0.893752		3.93417	4.13779	0.000797479	0.00376947	up	3.93417	-0.248844	0.893865	0.9488		3.93417	0.13052	0.928279	0.958585		3.93417	-2.02775	0.278448	0.581703
NCU01563	0	114.854	-0.60347	0.0127272	0.0282368		114.854	-0.844765	0.000592202	0.00281878		114.854	-0.50015	0.0386353	0.0873842		114.854	-0.380454	0.110664	0.257968		114.854	-0.689867	0.00226446	0.0109375		114.854	0.0721152	0.75103	0.896684
NCU01564	0	354.474	-0.140676	0.635107	0.737725		354.474	-0.0270709	0.927044	0.951037		354.474	0.145518	0.622475	0.723419		354.474	-0.275563	0.353893	0.560377		354.474	-0.16874	0.564277	0.710086		354.474	-0.232961	0.430527	0.716965
NCU01565	0	1003.28	-0.245051	0.493589	0.60876		1003.28	-0.183851	0.607345	0.709389		1003.28	-0.944903	0.00854447	0.0264349		1003.28	-0.568204	0.112942	0.262078		1003.28	-0.480427	0.178413	0.325758		1003.28	0.222806	0.532735	0.787434
NCU01566	0	0.976273	3.10558	0.215813	0.313402		0.976273	0.755755	0.787171	1		0.976273	0.883946	0.753055	1		0.976273	0.791689	0.778878	1		0.976273	1.69357	0.502012	1		0.976273	0.507946	0.856297	1
NCU01567	0	6.82949	0.181303	0.74949	0.829372		6.82949	-1.13729	0.0981492	0.181002		6.82949	-1.98748	0.0204632	0.0532765		6.82949	-1.03527	0.132188	0.292313		6.82949	-1.82423	0.00415134	0.0179168		6.82949	-1.19558	0.0725698	0.282594
NCU01568	0	102.322	0.872148	0.152451	0.233601		102.322	0.369426	0.54599	0.65839		102.322	0.810132	0.184303	0.2931		102.322	-0.22849	0.711317	0.844545		102.322	-0.13883	0.819592	0.89514		102.322	-1.44642	0.0215886	0.137953
NCU01569	0	378.648	-1.04818	5.64975e-07	4.0521e-06		378.648	-1.05292	4.69839e-07	5.9114e-06		378.648	-0.958425	4.75143e-06	4.59999e-05		378.648	-0.771006	0.000203324	0.00194191		378.648	-0.732459	0.000274899	0.00188798		378.648	-0.0879082	0.663695	0.857285
NCU01570	0	217.941	0.696001	0.00508695	0.012748		217.941	0.295548	0.238502	0.356107		217.941	0.406787	0.105159	0.190862		217.941	0.118654	0.639115	0.792982		217.941	0.0815476	0.739764	0.842516		217.941	-0.20917	0.408375	0.699459
NCU01571	0	364.63	-1.03542	0.000299346	0.00108743		364.63	-0.567913	0.0448512	0.0971338		364.63	-0.346663	0.220195	0.336091		364.63	-0.415428	0.141862	0.307425		364.63	-0.460626	0.0986051	0.212268		364.63	-0.234056	0.404403	0.697287
NCU01572	0	38.0508	-2.41159	0.000230982	0.000869745	down	38.0508	-0.737513	0.213066	0.326417		38.0508	-2.05059	0.00135237	0.00588266	down	38.0508	-1.02257	0.0887177	0.221359		38.0508	-0.969725	0.0940833	0.206031		38.0508	-0.530777	0.364108	0.666161
NCU01573	0	10.4978	-0.538797	0.365873	0.480427		10.4978	-0.32761	0.569701	0.678467		10.4978	-1.45971	0.0361907	0.0833667		10.4978	-1.05784	0.100575	0.242012		10.4978	-0.461902	0.38206	0.55265		10.4978	-0.949648	0.116012	0.367843
NCU01575	0	780.531	-0.471753	0.0230772	0.0473248		780.531	-0.645781	0.00190628	0.00734827		780.531	-0.932956	8.85986e-06	7.89438e-05		780.531	-0.139932	0.498304	0.68835		780.531	-0.386696	0.0587414	0.146004		780.531	0.617421	0.00252478	0.0344646
NCU01577	0	140.041	-0.0386796	0.851035	0.906264		140.041	-0.336568	0.109705	0.19705		140.041	-0.17632	0.401779	0.528471		140.041	0.383925	0.0544007	0.156297		140.041	0.132907	0.482412	0.640727		140.041	0.748026	9.39236e-05	0.00347317
NCU01579	0	116.237	0.0621615	0.860392	0.912679		116.237	-1.08692	0.00286027	0.0103827		116.237	-1.53792	4.10589e-05	0.000300928		116.237	-1.4916	6.33099e-05	0.000762762		116.237	-1.34352	0.000154313	0.00115587		116.237	-1.13912	0.00165098	0.0264066
NCU01580	0	110.349	0.67653	0.0710721	0.123206		110.349	0.391023	0.299283	0.420099		110.349	0.406287	0.282535	0.407727		110.349	0.0586495	0.877785	0.93922		110.349	0.199953	0.589102	0.73068		110.349	-0.458469	0.232355	0.527135
NCU01581	0	133.388	-2.235	0.00248055	0.0068249	down	133.388	-2.0026	0.00650583	0.0205155	down	133.388	-2.46757	0.000885644	0.00411794	down	133.388	-1.33154	0.0689181	0.185		133.388	-1.85137	0.0110942	0.0392246		133.388	-1.90722	0.00931962	0.0796864
NCU01584	0	473.222	-1.08324	0.0693885	0.120609		473.222	-1.78445	0.00284196	0.010329		473.222	-1.57709	0.00833476	0.0259588		473.222	-1.7377	0.00366669	0.0201831		473.222	-1.78526	0.00273233	0.0127514		473.222	-1.71193	0.00414819	0.0472294
NCU01585	0	396.456	0.222148	0.0833919	0.141592		396.456	0.370802	0.00334828	0.0117816		396.456	0.146645	0.258924	0.382011		396.456	0.491664	9.78046e-05	0.00108225		396.456	0.355888	0.00298249	0.0136704		396.456	0.381204	0.00220351	0.0315042
NCU01587	0	3832.26	0.407573	9.27106e-05	0.000392944		3832.26	0.359984	0.000553999	0.00267226		3832.26	0.340992	0.00109453	0.00492342		3832.26	0.410427	8.3104e-05	0.000952449		3832.26	0.49478	1.69192e-06	2.42381e-05		3832.26	0.0690619	0.507904	0.770629
NCU01589	0	1799.87	2.60196	1.08256e-07	9.18067e-07	up	1799.87	2.22468	5.5935e-06	5.12873e-05	up	1799.87	1.88599	0.000118873	0.000763048		1799.87	0.947354	0.0534783	0.154404		1799.87	1.68618	0.000575274	0.00348039		1799.87	0.0949471	0.846694	0.939649
NCU01591	0	4.75559	-4.70919	0.00572024	0.01415	down	4.75559	-4.77979	0.00503494	0.0165196	down	4.75559	-1.16504	0.313663	0.439999		4.75559	0.662954	0.499136	0.688949		4.75559	-0.202495	0.83385	0.904011		4.75559	0.26009	0.791644	0.918859
NCU01592	0	2.50358	1.22023	0.486636	0.602588		2.50358	1.2268	0.482368	0.602466		2.50358	3.0956	0.0595462	0.122716		2.50358	-2.1655	0.314087	1		2.50358	0.483118	0.777885	0.867271		2.50358	0.874634	0.61894	1
NCU01593	0	4.40176	1.84636	0.127267	0.201487		4.40176	2.01087	0.0908263	0.170449		4.40176	4.35926	6.14792e-05	0.00042554	up	4.40176	-2.15225	0.228948	0.424853		4.40176	1.09166	0.3519	0.522375		4.40176	-2.48511	0.164791	0.44245
NCU01595	0	90.0007	2.27399	2.50272e-05	0.000122692	up	90.0007	1.12887	0.0385135	0.0859866		90.0007	1.64235	0.00249038	0.00974435		90.0007	-0.0781871	0.889314	0.946238		90.0007	0.2998	0.581175	0.724619		90.0007	-0.716793	0.20711	0.496832
NCU01596	0	857.352	0.472602	0.00481813	0.0121955		857.352	0.441358	0.00843214	0.0254288		857.352	0.508327	0.00245052	0.00964769		857.352	0.442086	0.0084351	0.0390684		857.352	0.681973	3.56226e-05	0.000336039		857.352	-0.0131732	0.937587	0.977227
NCU01597	0	335.738	0.363328	0.0803759	0.137151		335.738	0.770162	0.00016928	0.00095976		335.738	0.95582	2.9876e-06	3.05995e-05		335.738	0.683691	0.000894753	0.00645181		335.738	0.716716	0.0003545	0.00232795		335.738	0.171545	0.407267	0.698807
NCU01598	0	26.2341	-1.45734	0.00494047	0.0124427		26.2341	-1.08238	0.0284524	0.0673695		26.2341	-0.340374	0.469135	0.589353		26.2341	-0.955806	0.0523793	0.152126		26.2341	-1.29892	0.00479362	0.0201287		26.2341	-0.480178	0.299155	0.602839
NCU01599	0	440.262	-0.662055	0.002236	0.0062362		440.262	-1.0698	9.94935e-07	1.13621e-05		440.262	-1.08483	8.05142e-07	9.6171e-06		440.262	-1.21958	3.1754e-08	1.23769e-06		440.262	-1.10957	1.99376e-07	3.84779e-06		440.262	0.168606	0.426969	0.713856
NCU01601	0	388.673	0.57211	0.056683	0.102027		388.673	0.752692	0.0119297	0.0336031		388.673	0.702942	0.0191365	0.0504617		388.673	0.357598	0.235069	0.433382		388.673	0.789847	0.00781063	0.0300166		388.673	-0.126204	0.675876	0.862903
NCU01605	0	162.791	-0.367403	0.396106	0.51275		162.791	-0.973321	0.0259649	0.0628606		162.791	-0.3434	0.428107	0.55246		162.791	-0.426093	0.325678	0.533393		162.791	-0.718311	0.0939539	0.205814		162.791	-0.956678	0.0278516	0.161745
NCU01606	0	4208.66	0.557672	0.0548966	0.0993343		4208.66	0.473914	0.102818	0.1875		4208.66	0.780329	0.00721918	0.0230113		4208.66	0.303299	0.296631	0.503087		4208.66	0.464123	0.109804	0.229936		4208.66	-0.0223817	0.938609	0.977594
NCU01607	0	153.959	-0.46115	0.0894947	0.150224		153.959	-0.23806	0.373674	0.499532		153.959	0.426029	0.104208	0.189564		153.959	-0.160811	0.548242	0.729499		153.959	-0.354568	0.170119	0.314512		153.959	0.192168	0.461416	0.740224
NCU01608	0	19.0623	-2.32668	0.0175144	0.0373063	down	19.0623	-1.93625	0.0397938	0.0882211		19.0623	-1.9242	0.0433157	0.0954782		19.0623	-0.198039	0.819858	0.90557		19.0623	-0.680541	0.426241	0.592995		19.0623	0.81449	0.33673	0.641726
NCU01610	0	7.29048	-0.133828	0.868901	0.91827		7.29048	0.113154	0.883777	0.921009		7.29048	0.2903	0.706811	0.792227		7.29048	1.53213	0.0235076	0.0843466		7.29048	0.95837	0.140742	0.27486		7.29048	0.668718	0.34416	0.648237
NCU01611	0	395.003	-0.963595	0.0618976	0.109828		395.003	-1.25428	0.0152351	0.041131		395.003	-0.743971	0.149131	0.249464		395.003	-0.925086	0.0730484	0.192827		395.003	-0.9353	0.068578	0.163342		395.003	-0.118513	0.817531	0.928723
NCU01612	0	304.854	1.75758	0.00150029	0.00438465		304.854	1.34395	0.0152971	0.0412605		304.854	1.16116	0.0363431	0.0836337		304.854	-0.0643435	0.908281	0.957174		304.854	0.0733173	0.89479	0.939428		304.854	-1.05188	0.0614215	0.256257
NCU01613	0	217.83	2.17443	5.07628e-12	9.51977e-11	up	217.83	2.03446	1.08928e-10	2.94438e-09	up	217.83	1.25875	8.24682e-05	0.000553483		217.83	0.468287	0.150738	0.320634		217.83	0.93878	0.00289179	0.0133685		217.83	0.175484	0.589799	0.818233
NCU01614	0	483.767	0.142829	0.201407	0.295798		483.767	0.00900452	0.936119	0.958235		483.767	0.110233	0.328491	0.455813		483.767	0.0513331	0.649165	0.800007		483.767	0.130079	0.214836	0.373373		483.767	0.227305	0.0369136	0.191265
NCU01615	0	127.223	-0.923891	0.000182012	0.000703884		127.223	-0.0816205	0.72099	0.802927		127.223	-0.842263	0.000647104	0.00318472		127.223	0.0974505	0.668186	0.813355		127.223	0.0242264	0.91061	0.948006		127.223	0.342216	0.120628	0.37561
NCU01620	0	53.7542	-3.63054	2.1885e-06	1.37343e-05	down	53.7542	-3.56273	2.59049e-06	2.6079e-05	down	53.7542	-3.92098	8.12214e-07	9.68848e-06	down	53.7542	-3.01765	3.9099e-05	0.00051339	down	53.7542	-2.74313	6.8174e-05	0.000582213	down	53.7542	0.399063	0.550396	0.798517
NCU01623	0	73.5103	-1.71302	4.74022e-06	2.78855e-05		73.5103	-0.757825	0.0257325	0.0624176		73.5103	-0.490487	0.145685	0.244672		73.5103	-0.710103	0.0373237	0.118562		73.5103	-0.300177	0.341459	0.51084		73.5103	0.512667	0.104972	0.348285
NCU01625	0	193.034	0.222486	0.143427	0.222369		193.034	-0.0623528	0.688756	0.776275		193.034	0.131052	0.397794	0.524383		193.034	0.451484	0.00245819	0.0147304		193.034	0.459787	0.000789371	0.00454544		193.034	0.332574	0.0229872	0.143306
NCU01629	0	80.2426	-1.67368	0.00324277	0.00864167		80.2426	-2.55769	1.1952e-05	9.93826e-05	down	80.2426	-2.44259	2.98285e-05	0.000229065	down	80.2426	-2.29939	7.43182e-05	0.000870197	down	80.2426	-2.33648	3.23447e-05	0.000311017	down	80.2426	-1.20205	0.0317873	0.175642
NCU01631	0	1.88972	-2.04323	0.302833	0.412574		1.88972	-1.13013	0.511159	0.627749		1.88972	-0.0230874	0.988246	0.993303		1.88972	-2.02473	0.309911	1		1.88972	-0.521587	0.726992	0.833342		1.88972	-0.0258599	0.986484	1
NCU01632	0	2096.1	2.60134	1.84916e-08	1.79904e-07	up	2096.1	1.76144	0.000140328	0.000824157		2096.1	1.70696	0.000224935	0.00129762		2096.1	0.910992	0.049143	0.144638		2096.1	1.05058	0.0231144	0.0702813		2096.1	-0.444818	0.337737	0.642859
NCU01633	0	36384.8	-2.98787	1.49275e-13	3.76448e-12	down	36384.8	-2.40915	2.5492e-09	5.22792e-08	down	36384.8	-2.14844	1.07449e-07	1.57764e-06	down	36384.8	-1.71262	2.27278e-05	0.0003224		36384.8	-1.96712	1.13631e-06	1.72806e-05		36384.8	1.45957	0.000304761	0.00813919
NCU01634	0	8212.21	0.477024	0.165114	0.250243		8212.21	-0.0348854	0.919159	0.944694		8212.21	0.0507575	0.882606	0.92287		8212.21	0.0128873	0.970092	0.988019		8212.21	-0.141782	0.679874	0.801254		8212.21	-0.42975	0.211231	0.502691
NCU01635	0	20244.5	0.706894	0.0127516	0.0282801		20244.5	-0.00485714	0.986348	0.992481		20244.5	0.0606616	0.830787	0.887449		20244.5	0.194157	0.493977	0.685657		20244.5	0.0341822	0.90413	0.944695		20244.5	-0.285168	0.315101	0.620581
NCU01636	0	262.11	0.0832985	0.715769	0.802469		262.11	-0.732834	0.00188947	0.00730577		262.11	-0.313107	0.178867	0.28657		262.11	-0.0862656	0.707998	0.842575		262.11	-0.413751	0.0655509	0.157919		262.11	0.856374	0.000123975	0.00419047
NCU01637	0	202.112	0.480009	0.0295227	0.0583694		202.112	0.0360369	0.872029	0.913471		202.112	-0.0162778	0.942531	0.963571		202.112	-0.526983	0.0228454	0.0826427		202.112	-0.350034	0.108611	0.228141		202.112	-0.0342068	0.877672	0.952781
NCU01638	0	674.763	1.40423	0.0233784	0.0478502		674.763	0.795362	0.199351	0.31056		674.763	0.88537	0.153141	0.254467		674.763	-0.286333	0.644835	0.796963		674.763	-0.346725	0.575845	0.720438		674.763	-0.979642	0.115215	0.366663
NCU01640	0	2656.14	-3.59383	5.45776e-11	8.56002e-10	down	2656.14	-1.67819	0.0021219	0.00808427		2656.14	-2.13625	9.27032e-05	0.000610584	down	2656.14	-1.89785	0.000513086	0.00416485		2656.14	-2.25769	3.54772e-05	0.000335185	down	2656.14	-1.31803	0.0157731	0.112677
NCU01642	0	1434.14	-1.14992	1.40271e-07	1.15285e-06		1434.14	-0.242737	0.262094	0.380675		1434.14	-0.430717	0.0471485	0.10208		1434.14	-0.11519	0.594522	0.763831		1434.14	-0.409063	0.0576161	0.14378		1434.14	-0.112305	0.603095	0.825373
NCU01643	0	430.907	0.0501082	0.751618	0.831151		430.907	-0.246913	0.121878	0.213281		430.907	-0.539183	0.000923968	0.00426919		430.907	-1.15677	6.21218e-12	5.4851e-10		430.907	-0.973466	6.3573e-10	2.22103e-08		430.907	-0.34256	0.0309954	0.172923
NCU01644	0	543.219	-0.503141	0.0336855	0.0654253		543.219	-0.103514	0.6596	0.752965		543.219	-0.0709284	0.763215	0.836876		543.219	-0.0373427	0.873803	0.936581		543.219	0.00841825	0.971071	0.98307		543.219	-0.443755	0.0594005	0.25085
NCU01645	0	2006.69	-2.71208	7.65323e-06	4.28894e-05	down	2006.69	-1.96036	0.00120388	0.00503954		2006.69	-2.4637	4.78338e-05	0.000344218	down	2006.69	-2.18017	0.000318525	0.0027925	down	2006.69	-2.30922	0.000135386	0.00102916	down	2006.69	-1.49246	0.0136447	0.101433
NCU01646	0	427.114	-1.05205	9.74239e-06	5.30462e-05		427.114	-0.729855	0.00193825	0.00745852		427.114	-0.892781	0.000169016	0.00102676		427.114	-0.505947	0.0311847	0.103877		427.114	-0.719109	0.00186942	0.00931357		427.114	-0.163715	0.480658	0.750792
NCU01647	0	7.73158	-0.351977	0.720447	0.806264		7.73158	1.20109	0.169925	0.275085		7.73158	-0.483736	0.63123	0.73058		7.73158	0.950545	0.285569	0.489215		7.73158	0.585083	0.495576	0.65165		7.73158	0.69008	0.436461	0.72295
NCU01648	0	3511.29	-1.13786	1.62818e-12	3.42168e-11		3511.29	-0.775184	1.39087e-06	1.52153e-05		3511.29	-0.866108	7.2897e-08	1.13042e-06		3511.29	-0.528319	0.000994153	0.00701664		3511.29	-0.697078	1.29218e-05	0.000141357		3511.29	-0.367826	0.0216041	0.137953
NCU01649	0	92.7383	1.87719	6.11796e-06	3.5002e-05		92.7383	0.89578	0.0351722	0.0799034		92.7383	2.63378	1.43245e-10	3.91996e-09	up	92.7383	0.852557	0.0460906	0.13848		92.7383	1.5438	0.00016536	0.00122516		92.7383	-0.0403799	0.926625	0.973024
NCU01650	0	281.088	0.840201	0.0571168	0.102692		281.088	0.77582	0.0789737	0.152913		281.088	0.735428	0.0963266	0.178273		281.088	0.473875	0.284749	0.4881		281.088	0.663037	0.131384	0.261762		281.088	0.114357	0.796345	0.92079
NCU01651	0	47.5988	2.21516	3.01027e-05	0.000145327	up	47.5988	0.922957	0.0894945	0.168378		47.5988	1.24416	0.0214889	0.0553924		47.5988	-0.663765	0.260496	0.462247		47.5988	0.0412459	0.939134	0.964784		47.5988	-0.564479	0.324525	0.630469
NCU01652	0	1408.46	-1.25675	0.0197609	0.0413378		1408.46	-0.27919	0.603746	0.706729		1408.46	-0.921078	0.087351	0.165582		1408.46	1.03325	0.0544469	0.156365		1408.46	0.894817	0.0956279	0.208242		1408.46	0.594472	0.26853	0.570173
NCU01653	0	32.4567	2.80493	9.19116e-05	0.000390075	up	32.4567	2.38089	0.00099561	0.00429278	up	32.4567	0.624028	0.433088	0.557377		32.4567	2.93612	4.08598e-05	0.000533273	up	32.4567	4.03034	8.20365e-09	2.23803e-07	up	32.4567	1.22968	0.0999527	0.337871
NCU01654	0	1091.84	0.123037	0.445165	0.561614		1091.84	0.0809211	0.615415	0.715932		1091.84	0.249183	0.12178	0.213066		1091.84	0.145025	0.368196	0.573744		1091.84	-0.0243677	0.87833	0.930213		1091.84	0.250985	0.117099	0.369128
NCU01655	0	265.588	0.150203	0.472415	0.588325		265.588	0.103883	0.618911	0.719147		265.588	0.101404	0.629491	0.729045		265.588	0.261781	0.208978	0.401887		265.588	0.227397	0.260075	0.425625		265.588	0.121276	0.557876	0.799559
NCU01656	0	115.13	-0.665899	0.0039713	0.0102958		115.13	0.0420613	0.844944	0.89507		115.13	0.0413226	0.849451	0.900108		115.13	-0.184459	0.403697	0.605966		115.13	-0.211105	0.301198	0.471119		115.13	-0.014611	0.945142	0.98026
NCU01657	0	298.395	0.720119	0.00384617	0.0100212		298.395	0.6023	0.0157323	0.0422669		298.395	0.599495	0.0165945	0.0450626		298.395	0.499222	0.0462834	0.138748		298.395	0.537343	0.0285546	0.0838798		298.395	0.111589	0.656451	0.854715
NCU01658	0	725.341	-0.862864	0.000211481	0.000804216		725.341	-0.0763751	0.739729	0.816644		725.341	-0.208099	0.367056	0.494678		725.341	-0.0833957	0.717114	0.847259		725.341	-0.0967409	0.671197	0.794619		725.341	0.1098	0.631525	0.841352
NCU01659	0	627.852	-0.762267	0.0143488	0.0313365		627.852	-0.781077	0.012076	0.0338963		627.852	-0.82954	0.0077995	0.0245512		627.852	-0.630023	0.0428159	0.131238		627.852	-0.78837	0.0107451	0.0382504		627.852	-0.730298	0.0186663	0.125824
NCU01660	0	76.0245	-2.90395	3.63501e-07	2.71507e-06	down	76.0245	-1.84758	0.000541038	0.0026204		76.0245	-2.59924	3.66509e-06	3.6564e-05	down	76.0245	-0.519218	0.313535	0.521074		76.0245	-1.27706	0.0124979	0.0432026		76.0245	-0.267453	0.600298	0.823745
NCU01664	0	159.555	-0.290756	0.178278	0.267193		159.555	-0.322846	0.134037	0.229825		159.555	-0.390813	0.0741915	0.145988		159.555	-0.186713	0.384966	0.58989		159.555	-0.298287	0.143136	0.278152		159.555	0.052999	0.799025	0.922477
NCU01665	0	500.685	-0.0490571	0.889221	0.932116		500.685	0.0554476	0.874746	0.915124		500.685	0.061253	0.861902	0.909763		500.685	0.293771	0.403181	0.605577		500.685	-0.259428	0.45888	0.62152		500.685	-0.325879	0.354724	0.657405
NCU01666	0	3301.13	1.45497	0.00156377	0.00454927		3301.13	1.32248	0.00404661	0.0137675		3301.13	1.68783	0.00024353	0.00138696		3301.13	0.787581	0.0870418	0.218818		3301.13	1.07008	0.0199849	0.0624856		3301.13	-0.34568	0.45297	0.734707
NCU01667	0	1912.74	3.14855	1.27576e-06	8.42567e-06	up	1912.74	2.25873	0.000513454	0.00251158	up	1912.74	3.02467	3.27693e-06	3.31026e-05	up	1912.74	1.79692	0.00573491	0.0289522		1912.74	1.90997	0.00330214	0.0148311		1912.74	0.19042	0.770028	0.906486
NCU01668	0	554.256	-1.21435	0.000610838	0.00201485		554.256	-0.812483	0.021186	0.0534277		554.256	-0.415173	0.237932	0.357484		554.256	-0.399538	0.255804	0.456763		554.256	-0.466241	0.182162	0.330419		554.256	0.432731	0.215609	0.509303
NCU01669	0	206.625	1.50028	1.08401e-05	5.82947e-05		206.625	0.703582	0.0409037	0.090184		206.625	0.699057	0.0427577	0.0944366		206.625	0.0550492	0.874809	0.937425		206.625	0.461923	0.174931	0.320392		206.625	-0.390235	0.265516	0.566307
NCU01670	0	329.469	-0.0264964	0.910231	0.944049		329.469	-0.940997	9.00976e-05	0.000569244		329.469	-0.893511	0.000211768	0.00123146		329.469	-1.15162	2.16393e-06	4.52283e-05		329.469	-1.04235	8.5913e-06	9.98533e-05		329.469	0.0735925	0.752496	0.897003
NCU01672	0	9.31677	0.273322	0.706506	0.794712		9.31677	-1.38815	0.102855	0.187529		9.31677	-2.03765	0.0360565	0.0831473		9.31677	-0.787736	0.323896	0.531413		9.31677	-0.936585	0.197462	0.350264		9.31677	0.675448	0.33405	0.639221
NCU01673	0	135.03	0.225394	0.5958	0.70384		135.03	-0.341861	0.424945	0.549457		135.03	-0.542144	0.209274	0.323856		135.03	-0.605961	0.160588	0.333928		135.03	-0.637581	0.131883	0.262371		135.03	-0.202284	0.634653	0.842495
NCU01674	0	1228.29	-0.141473	0.404497	0.521287		1228.29	0.371424	0.027393	0.0653689		1228.29	0.298061	0.0774951	0.151143		1228.29	0.209274	0.215345	0.408905		1228.29	0.332644	0.0463167	0.122171		1228.29	0.111415	0.508291	0.77108
NCU01675	0	406.983	1.5448	0.00570896	0.0141294		406.983	0.739033	0.186741	0.295302		406.983	0.833977	0.136311	0.232462		406.983	-0.660867	0.241008	0.440337		406.983	-0.516436	0.356388	0.526687		406.983	-1.28952	0.0224776	0.141248
NCU01678	0	239.116	-3.91243	4.88674e-11	7.75325e-10	down	239.116	-3.89937	4.5609e-11	1.31744e-09	down	239.116	-0.08925	0.8697	0.91537		239.116	0.174726	0.747715	0.864676		239.116	-0.645796	0.233781	0.395881		239.116	0.077499	0.886445	0.957205
NCU01679	0	139.071	1.14257	1.76505e-07	1.419e-06		139.071	-0.515587	0.0314645	0.0730726		139.071	0.0713136	0.758333	0.833383		139.071	-0.399868	0.0947519	0.231934		139.071	-0.163828	0.455822	0.619562		139.071	0.0596696	0.792181	0.919235
NCU01680	0	25963.8	0.289692	0.341838	0.454977		25963.8	0.0461591	0.879619	0.918156		25963.8	0.352016	0.248077	0.369523		25963.8	0.166952	0.583835	0.756503		25963.8	0.0999922	0.74281	0.844528		25963.8	-0.659539	0.0304806	0.1716
NCU01684	0	1.26102	-2.92004	0.19996	0.293853		1.26102	-2.99064	0.189309	1		1.26102	0.141585	0.942315	1		1.26102	0.156469	0.935976	1		1.26102	-0.367733	0.844878	1		1.26102	-0.718292	0.723005	1
NCU01686	0	0.156621	2.28012	0.666521	0.763206		0.156621	2.10968	0.690301	1		0.156621	0	1	1		0.156621	0	1	1		0.156621	0	1	1		0.156621	0	1	1
NCU01689	0	3324.2	2.1348	1.07087e-06	7.18635e-06	up	3324.2	2.73884	3.83914e-10	9.29703e-09	up	3324.2	1.68472	0.000118985	0.000763213		3324.2	2.21523	4.14679e-07	1.11782e-05	up	3324.2	2.74153	3.64768e-10	1.33784e-08	up	3324.2	-0.462352	0.292353	0.598179
NCU01692	0	8284.39	1.28993	0.000736999	0.00236764		8284.39	1.45675	0.000137738	0.000811647		8284.39	1.10159	0.00394714	0.0141255		8284.39	0.720777	0.0593333	0.166422		8284.39	1.09355	0.00420823	0.0181446		8284.39	-0.332239	0.384917	0.684904
NCU01695	0	316.844	0.304167	0.0460155	0.085409		316.844	-0.152224	0.328722	0.452723		316.844	-0.198127	0.209743	0.324155		316.844	-0.203482	0.196103	0.384329		316.844	-0.0716457	0.627237	0.759992		316.844	0.0853566	0.573942	0.809537
NCU01696	0	272.655	-0.250236	0.0760153	0.130548		272.655	-0.503119	0.000449559	0.00225009		272.655	-0.277422	0.0514384	0.109111		272.655	-0.396846	0.00560744	0.028453		272.655	-0.43011	0.00111659	0.00605491		272.655	-0.334278	0.0158423	0.112919
NCU01697	0	358.031	1.48717	5.91366e-17	2.4427e-15		358.031	0.792243	1.16246e-05	9.73008e-05		358.031	0.452686	0.0138986	0.0390248		358.031	0.322344	0.0808349	0.20836		358.031	0.563488	0.0014386	0.00749684		358.031	-0.217551	0.2434	0.540174
NCU01698	0	1176.79	-0.392366	0.396243	0.512857		1176.79	-1.03563	0.0253131	0.0615523		1176.79	-0.816325	0.0778567	0.151581		1176.79	-1.09354	0.0182387	0.0698523		1176.79	-1.04645	0.0235604	0.071343		1176.79	-0.865012	0.0615222	0.256258
NCU01699	0	56.3837	-1.0396	0.00398498	0.0103155		56.3837	-0.791664	0.024625	0.0603271		56.3837	-0.929022	0.00991632	0.0296818		56.3837	-0.911943	0.0108845	0.0469979		56.3837	-1.15018	0.000644842	0.00383362		56.3837	-0.864141	0.0131359	0.0990976
NCU01700	0	77.7519	0.0781752	0.722946	0.808023		77.7519	-0.13978	0.5332	0.647602		77.7519	-0.225362	0.329822	0.457086		77.7519	-0.196748	0.389716	0.594118		77.7519	-0.0262584	0.895909	0.940254		77.7519	-0.0672018	0.756553	0.899533
NCU01701	0	449.027	-0.325236	0.383268	0.498955		449.027	-0.0274801	0.94112	0.961905		449.027	-0.528871	0.157323	0.259775		449.027	-0.260518	0.4848	0.677273		449.027	-0.306001	0.408892	0.577624		449.027	-0.339877	0.361199	0.663493
NCU01702	0	869.677	0.196427	0.322523	0.434031		869.677	0.335171	0.0905924	0.170118		869.677	0.204694	0.303066	0.429846		869.677	0.137973	0.487626	0.679895		869.677	0.0648855	0.741385	0.843602		869.677	-0.0303249	0.878497	0.953212
NCU01703	0	513.514	-0.887714	0.00109584	0.00334056		513.514	-1.13953	2.94606e-05	0.000216821		513.514	-1.28039	3.06175e-06	3.12143e-05		513.514	-1.11506	4.45501e-05	0.000575361		513.514	-1.05841	8.18373e-05	0.000679211		513.514	0.344968	0.197615	0.485784
NCU01704	0	687.171	-0.00609579	0.984933	0.996791		687.171	-0.303279	0.348357	0.473082		687.171	-0.18392	0.569665	0.679065		687.171	-0.0506138	0.875473	0.937742		687.171	0.392051	0.221172	0.381444		687.171	1.10807	0.000547821	0.0121546
NCU01705	0	193.262	1.28506	0.000956882	0.00297073		193.262	0.745908	0.0565553	0.116308		193.262	0.793875	0.0427218	0.0943809		193.262	0.576671	0.141999	0.307641		193.262	0.705108	0.0685742	0.163342		193.262	-0.0841005	0.83142	0.934079
NCU01706	0	22.6247	-0.770582	0.39713	0.513798		22.6247	-0.318189	0.723642	0.804663		22.6247	-0.961738	0.2943	0.420335		22.6247	-1.44686	0.120103	0.273776		22.6247	-2.00513	0.027748	0.081864		22.6247	-2.11364	0.0252632	0.152336
NCU01713	0	281.932	0.218058	0.269669	0.376327		281.932	0.634776	0.00105475	0.00451912		281.932	0.57401	0.00329132	0.0121693		281.932	0.365266	0.0630665	0.174001		281.932	0.483119	0.0106196	0.0379105		281.932	0.0934078	0.633719	0.842431
NCU01715	0	53.9151	-0.487728	0.187695	0.278865		53.9151	-1.0357	0.00716134	0.0222102		53.9151	-0.75309	0.0478979	0.103291		53.9151	0.234865	0.508373	0.696784		53.9151	-0.556936	0.110186	0.230682		53.9151	-0.252388	0.48076	0.750792
NCU01717	0	1.40483	-2.92842	0.202125	0.29658		1.40483	-1.58148	0.487901	1		1.40483	-2.84398	0.215451	1		1.40483	0.522711	0.78632	1		1.40483	-0.422095	0.824583	1		1.40483	0.824855	0.660658	1
NCU01720	0	2034.13	-0.213406	0.421932	0.538399		2034.13	-0.350502	0.187262	0.295943		2034.13	-0.617156	0.020411	0.0531878		2034.13	-0.921641	0.000542076	0.00433912		2034.13	-1.10729	3.04631e-05	0.000295894		2034.13	-0.83783	0.00163434	0.0262862
NCU01722	0	1147.21	0.855773	0.0121999	0.0272865		1147.21	1.027	0.00261588	0.00963004		1147.21	0.430866	0.207758	0.32234		1147.21	0.63995	0.061089	0.169751		1147.21	0.941536	0.00571038	0.0233136		1147.21	-0.459664	0.179991	0.464948
NCU01724	0	600.846	0.576657	0.0010663	0.00326779		600.846	0.366526	0.0381182	0.0852547		600.846	0.279493	0.11595	0.205502		600.846	0.391238	0.0271218	0.0931279		600.846	0.552944	0.00141842	0.00741858		600.846	-0.0178128	0.920013	0.971005
NCU01725	0	153.937	0.911705	0.0294497	0.058273		153.937	0.414732	0.324445	0.447948		153.937	0.579369	0.168581	0.274068		153.937	-0.355881	0.405456	0.607412		153.937	-0.170024	0.684369	0.804835		153.937	-0.663245	0.120831	0.376055
NCU01728	0	1146.71	0.621298	0.205155	0.300059		1146.71	-0.21404	0.66281	0.754777		1146.71	0.268534	0.584151	0.690929		1146.71	-0.695264	0.157174	0.329742		1146.71	-0.427961	0.382745	0.553062		1146.71	-1.34667	0.00619059	0.0616423
NCU01729	0	563.82	-0.992823	0.000581453	0.00193382		563.82	-0.726679	0.0114148	0.0324423		563.82	-0.684444	0.0173442	0.0466115		563.82	-0.315323	0.270619	0.473926		563.82	-0.559242	0.0490699	0.127417		563.82	0.105713	0.710235	0.88173
NCU01731	0	1153.68	-1.10158	3.66693e-10	4.9563e-09		1153.68	-0.990658	1.57038e-08	2.70577e-07		1153.68	-1.14822	7.18247e-11	2.04884e-09		1153.68	-0.802073	4.55901e-06	8.42929e-05		1153.68	-1.13128	6.50353e-11	2.87424e-09		1153.68	-0.560173	0.00126081	0.0219956
NCU01734	0	9.72916	-4.09706	0.000815171	0.00259215	down	9.72916	-3.56208	0.000871761	0.00387211	down	9.72916	-2.46534	0.00653572	0.0212543	down	9.72916	-1.50444	0.0607923	0.169307		9.72916	-1.35968	0.0636079	0.154501		9.72916	-1.47825	0.057476	0.245335
NCU01735	0	1360.86	-3.91117	9.61381e-07	6.52935e-06	down	1360.86	-4.45309	2.57391e-08	4.26843e-07	down	1360.86	-4.12216	2.49246e-07	3.36863e-06	down	1360.86	-1.67594	0.0351145	0.113333		1360.86	-2.54272	0.00138647	0.00726867	down	1360.86	-1.02949	0.195342	0.483632
NCU01737	0	546.506	0.174383	0.203583	0.298216		546.506	0.349478	0.00999084	0.0290777		546.506	0.565241	2.94744e-05	0.00022674		546.506	0.302563	0.0266671	0.0921705		546.506	0.382989	0.00347516	0.0154823		546.506	0.229649	0.0889962	0.318348
NCU01738	0	499.1	0.272645	0.0186246	0.0393473		499.1	0.0640806	0.583775	0.690947		499.1	0.125172	0.287704	0.413432		499.1	0.220152	0.0587828	0.165414		499.1	0.160029	0.14594	0.282144		499.1	0.338757	0.00281913	0.0371292
NCU01739	0	673.066	-0.214537	0.145142	0.224483		673.066	-0.16036	0.274124	0.394045		673.066	-0.115895	0.431024	0.555206		673.066	0.0653832	0.65433	0.80399		673.066	-0.172324	0.227501	0.387976		673.066	0.147604	0.3067	0.611206
NCU01740	0	1543.03	0.136051	0.465831	0.581788		1543.03	-0.864037	4.37518e-06	4.12284e-05		1543.03	-0.61994	0.000970873	0.00445101		1543.03	-0.498311	0.00789075	0.0370878		1543.03	-0.413705	0.0260774	0.0776611		1543.03	-0.424122	0.0232504	0.144116
NCU01741	0	237.973	-1.03068	5.76286e-07	4.12438e-06		237.973	-1.14982	2.71121e-08	4.46264e-07		237.973	-0.87793	1.9032e-05	0.000155619		237.973	-0.727197	0.000339218	0.00294704		237.973	-0.778625	6.04429e-05	0.000526176		237.973	-0.789273	8.1159e-05	0.00314127
NCU01742	0	100.74	0.822966	0.0384931	0.0733213		100.74	0.066933	0.868225	0.911972		100.74	0.102721	0.799628	0.863836		100.74	-0.643943	0.120363	0.274078		100.74	-0.358959	0.366622	0.536916		100.74	-0.658295	0.107919	0.353452
NCU01744	0	2060.61	1.10475	0.0997042	0.164821		2060.61	0.803222	0.231365	0.347737		2060.61	1.31289	0.0504028	0.107417		2060.61	0.239495	0.721284	0.849529		2060.61	0.570612	0.395063	0.564551		2060.61	-1.11415	0.0973095	0.33387
NCU01745	0	1040.58	-1.03191	1.98693e-05	0.000100057		1040.58	-0.569903	0.0178176	0.0464299		1040.58	-0.452834	0.0598227	0.123142		1040.58	-0.510813	0.0337501	0.109973		1040.58	-0.487774	0.0410915	0.111243		1040.58	0.0498079	0.835027	0.935569
NCU01746	0	83.5256	-1.22012	0.00167849	0.00484778		83.5256	-1.04355	0.00629219	0.0199877		83.5256	-0.0762122	0.835343	0.89041		83.5256	-0.196042	0.593816	0.763315		83.5256	-0.468692	0.189379	0.339057		83.5256	0.292727	0.413766	0.704232
NCU01747	0	873.781	-1.01618	9.02071e-08	7.75525e-07		873.781	-0.448274	0.0167414	0.0444269		873.781	-0.230776	0.217555	0.333185		873.781	0.297543	0.108846	0.255449		873.781	0.0153644	0.933467	0.961533		873.781	0.0621513	0.737407	0.891977
NCU01748	0	4315.14	-2.14	0.00747522	0.0178285	down	4315.14	-2.16943	0.00669355	0.0210032	down	4315.14	-1.6365	0.0407776	0.0912259		4315.14	-1.74367	0.0292771	0.0988817		4315.14	-1.91811	0.0164733	0.0536902		4315.14	-2.48704	0.00187953	0.0287801	down
NCU01750	0	90.567	-1.47759	0.00179187	0.00513348		90.567	-1.02448	0.0272402	0.0651274		90.567	-0.816843	0.0777971	0.151498		90.567	-1.1211	0.0163694	0.0647371		90.567	-1.16385	0.0102416	0.0368758		90.567	0.199548	0.657568	0.855064
NCU01751	0	285.742	-1.70025	2.62193e-06	1.62352e-05		285.742	-0.689893	0.0501188	0.106261		285.742	0.158609	0.649272	0.746803		285.742	-0.362579	0.301412	0.507614		285.742	-0.561606	0.105565	0.223334		285.742	0.419204	0.226701	0.51983
NCU01752	0	8112.16	0.726587	0.0717506	0.12418		8112.16	0.578636	0.151573	0.252464		8112.16	0.422053	0.29563	0.421872		8112.16	0.316921	0.432267	0.629698		8112.16	0.373472	0.354589	0.524905		8112.16	-0.581274	0.149861	0.422884
NCU01753	0	516.43	0.309923	0.207334	0.30274		516.43	0.680094	0.00528256	0.0171794		516.43	1.53667	2.03367e-10	5.46371e-09		516.43	1.37146	1.4381e-08	6.01153e-07		516.43	1.26584	1.32106e-07	2.67204e-06		516.43	0.216248	0.376998	0.678645
NCU01754	0	48046.7	-2.40757	3.68986e-09	4.05039e-08	down	48046.7	-1.68306	3.73455e-05	0.000268809		48046.7	-1.85264	5.66407e-06	5.37752e-05		48046.7	-0.770846	0.0589421	0.1657		48046.7	-0.977296	0.0166403	0.0540352		48046.7	0.51662	0.205571	0.495631
NCU01756	0	2020.29	0.0904156	0.541807	0.654025		2020.29	-0.0413166	0.780566	0.847491		2020.29	0.0732137	0.621703	0.722762		2020.29	0.591844	6.03257e-05	0.000734174		2020.29	0.408876	0.00530274	0.0218614		2020.29	0.0236009	0.873169	0.95074
NCU01757	0	80.1526	-0.636143	0.0639621	0.112727		80.1526	0.756269	0.0160857	0.042974		80.1526	-0.178801	0.59159	0.697302		80.1526	0.707202	0.0252433	0.0886217		80.1526	0.476189	0.120131	0.245512		80.1526	-0.0486351	0.880146	0.954135
NCU01758	0	181.925	0.105875	0.591467	0.700102		181.925	0.581822	0.0022544	0.00847583		181.925	0.548235	0.00440971	0.0154366		181.925	0.274894	0.159244	0.332288		181.925	0.389811	0.0333365	0.0946855		181.925	0.161284	0.402231	0.695169
NCU01759	0	559.655	-0.195824	0.46356	0.579783		559.655	0.0336907	0.899183	0.93121		559.655	0.641938	0.0152048	0.0419854		559.655	0.609502	0.0211453	0.0783264		559.655	0.868646	0.000909611	0.00508221		559.655	0.475247	0.0717107	0.281029
NCU01760	0	41.0357	-0.075746	0.907452	0.943183		41.0357	-1.1546	0.0952239	0.176824		41.0357	2.6706	1.45085e-05	0.000122601	up	41.0357	0.156745	0.808315	0.898786		41.0357	-0.256418	0.684234	0.804835		41.0357	-0.595398	0.365689	0.667581
NCU01761	0	356.694	-0.140303	0.515411	0.629516		356.694	0.355767	0.0938635	0.175109		356.694	0.130444	0.543016	0.656148		356.694	0.235622	0.269738	0.47267		356.694	0.215565	0.301957	0.47195		356.694	-0.234609	0.273659	0.575868
NCU01762	0	71.2415	0.00611209	0.981544	0.994583		71.2415	0.00795136	0.97584	0.985351		71.2415	-0.23361	0.391568	0.51859		71.2415	0.0190049	0.942739	0.974032		71.2415	-0.127762	0.603287	0.74135		71.2415	-0.285424	0.279509	0.582653
NCU01763	0	165.049	-1.88327	7.9422e-06	4.42758e-05		165.049	-1.17767	0.00403735	0.0137466		165.049	-0.712524	0.0794225	0.15412		165.049	-0.261584	0.515292	0.702055		165.049	-0.476535	0.230062	0.391202		165.049	0.584371	0.140506	0.410328
NCU01764	0	65.8577	0.876961	0.106153	0.173684		65.8577	-0.0322992	0.953611	0.970408		65.8577	1.60453	0.00280882	0.0107245		65.8577	0.845542	0.119727	0.273133		65.8577	0.794992	0.136671	0.268631		65.8577	-0.101859	0.853654	0.941696
NCU01765	0	3631.66	-0.197095	0.605622	0.712889		3631.66	0.149637	0.694933	0.78176		3631.66	0.450037	0.238157	0.35765		3631.66	0.444179	0.244303	0.443217		3631.66	0.511886	0.179387	0.326976		3631.66	0.0203701	0.95742	0.984967
NCU01766	0	622.433	-0.0582069	0.833941	0.893573		622.433	0.166271	0.547974	0.659703		622.433	0.147219	0.595418	0.700597		622.433	0.722772	0.00874243	0.0400467		622.433	0.505434	0.0652926	0.15764		622.433	0.310729	0.259944	0.558692
NCU01767	0	778.671	0.356023	0.0714213	0.123744		778.671	0.382648	0.0523593	0.10985		778.671	0.236788	0.231995	0.350351		778.671	0.476148	0.01577	0.0627971		778.671	0.546568	0.00504664	0.0209916		778.671	-0.0175843	0.929124	0.973802
NCU01768	0	4750.31	-0.530967	0.022386	0.0460947		4750.31	0.871062	0.000171011	0.000967713		4750.31	0.651382	0.00496869	0.0170822		4750.31	0.63775	0.00595129	0.0297324		4750.31	0.77166	0.000860615	0.0048483		4750.31	-0.0381795	0.869292	0.948976
NCU01769	0	234.532	-0.0885008	0.811793	0.877146		234.532	-0.154715	0.67721	0.767418		234.532	-0.481294	0.198934	0.311327		234.532	-0.219567	0.555634	0.735682		234.532	-0.468051	0.203866	0.358204		234.532	0.36188	0.326141	0.632048
NCU01771	0	98.1632	0.395333	0.275135	0.382451		98.1632	0.533097	0.138678	0.236134		98.1632	0.423012	0.24379	0.364181		98.1632	-0.186389	0.61536	0.779338		98.1632	0.560351	0.111299	0.232166		98.1632	-0.363724	0.323541	0.629943
NCU01772	0	198.632	1.07418	1.86393e-05	9.44082e-05		198.632	0.542809	0.0324638	0.0749386		198.632	0.555796	0.0291965	0.0703564		198.632	-0.303092	0.249485	0.448907		198.632	-0.331568	0.188545	0.337906		198.632	-0.335826	0.195753	0.483829
NCU01776	0	17502	0.885484	0.000564547	0.00188767		17502	0.380112	0.138882	0.236346		17502	0.638578	0.0129045	0.036759		17502	-0.197021	0.443162	0.639539		17502	0.0873832	0.733628	0.837977		17502	-0.054416	0.832222	0.934374
NCU01777	0	1001.35	-0.710225	0.000113117	0.00046664		1001.35	-0.940184	3.49231e-07	4.51294e-06		1001.35	-0.507084	0.00574343	0.0192369		1001.35	-0.593702	0.00122828	0.00831634		1001.35	-0.579345	0.00137576	0.00723689		1001.35	0.292161	0.106659	0.351857
NCU01779	0	466.537	1.51683	1.35949e-05	7.12304e-05		466.537	0.505461	0.149526	0.250409		466.537	1.06177	0.00239416	0.00946844		466.537	0.525128	0.134571	0.296071		466.537	0.643399	0.0646611	0.156457		466.537	-0.272634	0.43947	0.725207
NCU01780	0	45.371	0.787709	0.214171	0.311348		45.371	-0.386128	0.55152	0.662545		45.371	0.669132	0.292776	0.418542		45.371	-1.40167	0.0388062	0.122017		45.371	-0.746553	0.241578	0.404123		45.371	-1.92405	0.00503827	0.0537561
NCU01781	0	579.917	-1.69684	0.00184661	0.00527116		579.917	-1.51299	0.00543015	0.0176265		579.917	-1.94621	0.00036612	0.00195892		579.917	-0.962418	0.076373	0.199293		579.917	-1.01943	0.0597381	0.147575		579.917	0.637763	0.238386	0.534467
NCU01782	0	1051.27	-0.521258	3.34601e-05	0.000159526		1051.27	-0.255814	0.0394844	0.0877331		1051.27	0.0709932	0.565743	0.676031		1051.27	-0.0685834	0.579893	0.753539		1051.27	-0.0770065	0.524306	0.676744		1051.27	-0.12791	0.298433	0.602399
NCU01783	0	151.846	0.508313	0.0399084	0.0756413		151.846	0.218341	0.381864	0.506648		151.846	0.311997	0.212677	0.327501		151.846	-0.0285349	0.910537	0.958384		151.846	0.00796484	0.973751	0.984663		151.846	-0.105963	0.672552	0.860631
NCU01784	0	86.2591	2.51812	3.15229e-07	2.39369e-06	up	86.2591	2.43995	7.24352e-07	8.66379e-06	up	86.2591	2.15477	1.36382e-05	0.000116359	up	86.2591	0.938555	0.065237	0.178018		86.2591	1.63514	0.000863431	0.00486106		86.2591	0.186873	0.717909	0.884298
NCU01785	0	116.633	2.58576	5.49646e-18	2.62053e-16	up	116.633	0.865742	0.00551551	0.0178708		116.633	0.86731	0.00573665	0.0192215		116.633	0.103529	0.751192	0.866559		116.633	0.335913	0.27186	0.439702		116.633	0.0434441	0.892353	0.959315
NCU01786	0	429.127	1.86838	0.00960722	0.0221899		429.127	0.766524	0.288658	0.409083		429.127	1.31812	0.0678901	0.136134		429.127	-0.570301	0.431807	0.629239		429.127	-0.466058	0.518916	0.672733		429.127	-0.797896	0.27119	0.572939
NCU01788	0	139.136	-0.849421	0.000153203	0.000603927		139.136	-0.541568	0.0125112	0.0348085		139.136	-0.624855	0.00476357	0.0164281		139.136	-0.120086	0.570456	0.746167		139.136	-0.348783	0.0826455	0.187742		139.136	-0.0244585	0.905584	0.964745
NCU01789	0	558.912	0.0618132	0.864871	0.915301		558.912	-0.0608689	0.866953	0.911177		558.912	-0.45387	0.213159	0.327701		558.912	-0.757473	0.0381274	0.120583		558.912	-0.721957	0.0464657	0.122308		558.912	-0.689803	0.0582106	0.247619
NCU01790	0	18.7679	0.969435	0.0633292	0.111827		18.7679	0.18989	0.732273	0.810936		18.7679	1.33254	0.00933106	0.0283427		18.7679	0.789139	0.136778	0.299858		18.7679	0.786628	0.11159	0.232684		18.7679	-0.00581056	0.991616	0.997806
NCU01791	0	406.129	-1.27806	5.6162e-09	5.96674e-08		406.129	-1.10598	3.62977e-07	4.68373e-06		406.129	-1.02292	2.67733e-06	2.76782e-05		406.129	-0.831201	0.000120391	0.00127216		406.129	-0.852709	5.22491e-05	0.000466494		406.129	-0.179746	0.395318	0.689785
NCU01792	0	1982.09	0.458505	0.00750463	0.0178824		1982.09	0.227211	0.185728	0.294413		1982.09	0.275485	0.108894	0.195991		1982.09	0.221969	0.196435	0.384646		1982.09	0.354188	0.0378875	0.104554		1982.09	0.0749243	0.662371	0.85629
NCU01793	0	1416.37	0.56596	0.0319458	0.062464		1416.37	0.549467	0.0372543	0.0837038		1416.37	0.410882	0.119757	0.21036		1416.37	0.0651523	0.805412	0.897288		1416.37	0.348869	0.184905	0.333857		1416.37	-0.432182	0.102559	0.343921
NCU01794	0	398.787	0.20812	0.336577	0.449688		398.787	0.406892	0.0587776	0.120179		398.787	-0.0870919	0.690641	0.778446		398.787	0.371761	0.0850846	0.215211		398.787	0.359583	0.0898067	0.199699		398.787	-0.201364	0.353782	0.656081
NCU01795	0	464.332	0.829802	5.09908e-05	0.000231695		464.332	0.565769	0.00591715	0.018943		464.332	0.526441	0.0107388	0.0316295		464.332	-0.0782173	0.708644	0.842809		464.332	0.347601	0.0866894	0.194727		464.332	-0.0404141	0.845365	0.938776
NCU01796	0	184.341	2.44812	1.12961e-34	2.51745e-32	up	184.341	0.624036	0.00360686	0.012487		184.341	1.48871	5.20578e-13	2.09213e-11		184.341	-0.0964831	0.674365	0.818068		184.341	0.374683	0.0673291	0.16128		184.341	0.631103	0.00280592	0.0370752
NCU01797	0	1219.4	-0.5648	0.0205978	0.0428454		1219.4	-0.830514	0.00067525	0.00313284		1219.4	-0.617286	0.011475	0.0333534		1219.4	-0.786143	0.00129769	0.00871808		1219.4	-0.738393	0.00234628	0.0112505		1219.4	-0.339974	0.162116	0.439196
NCU01798	0	23.8888	-1.40463	0.00159367	0.00462932		23.8888	-1.41468	0.00131231	0.00541382		23.8888	-1.19832	0.00596787	0.0197862		23.8888	-0.729763	0.0700359	0.187254		23.8888	-0.652815	0.0644958	0.1561		23.8888	-0.246572	0.502038	0.766641
NCU01799	0	33.6603	1.01002	0.00449397	0.0114842		33.6603	0.609638	0.0951317	0.176695		33.6603	0.614346	0.0971973	0.179396		33.6603	0.0428574	0.912938	0.959399		33.6603	0.669154	0.0476454	0.124782		33.6603	0.38537	0.291037	0.596482
NCU01800	0	671.482	1.7764	3.86968e-05	0.000181424		671.482	1.2907	0.00281671	0.0102498		671.482	1.27065	0.00329027	0.0121693		671.482	0.634351	0.143136	0.309329		671.482	0.961997	0.0257479	0.076965		671.482	-0.20883	0.630733	0.841074
NCU01801	0	51.3582	-1.50523	0.000578682	0.00192686		51.3582	-1.96078	1.48623e-05	0.00012041		51.3582	-1.5508	0.000452753	0.0023596		51.3582	-1.31615	0.00231319	0.0140168		51.3582	-1.58099	0.000110789	0.000870454		51.3582	0.147329	0.711049	0.881966
NCU01802	0	8.21549	-0.980376	0.284407	0.392945		8.21549	-1.75514	0.0748285	0.1462		8.21549	-0.160714	0.853269	0.902806		8.21549	-1.08411	0.2421	0.441401		8.21549	-1.26673	0.141175	0.275401		8.21549	-0.757774	0.389301	0.686634
NCU01803	0	290.053	1.25788	0.000237162	0.000889172		290.053	0.707558	0.0396031	0.0878864		290.053	0.574957	0.0956666	0.177348		290.053	0.511616	0.1382	0.302057		290.053	0.532748	0.11831	0.243365		290.053	0.0484222	0.888625	0.957807
NCU01804	0	376.147	0.556474	0.0887024	0.149155		376.147	-0.0733777	0.823359	0.878309		376.147	0.149434	0.649125	0.746803		376.147	-0.517937	0.117912	0.270635		376.147	-0.201341	0.536718	0.686449		376.147	0.061863	0.850149	0.940468
NCU01805	0	119.351	0.995911	0.000914842	0.00285801		119.351	0.562112	0.0644891	0.129786		119.351	0.345823	0.262666	0.386564		119.351	0.381769	0.214354	0.407915		119.351	0.477576	0.106163	0.224194		119.351	0.416633	0.16922	0.448609
NCU01806	0	196.432	1.72596	2.9778e-07	2.27562e-06		196.432	1.16171	0.000612846	0.00290142		196.432	1.35852	6.09382e-05	0.000422457		196.432	0.71727	0.0363356	0.116319		196.432	0.954095	0.004441	0.0189816		196.432	-0.165129	0.635081	0.842495
NCU01807	0	266.485	1.25301	0.0127291	0.0282368		266.485	0.474692	0.347151	0.472071		266.485	1.11572	0.0266881	0.0655813		266.485	0.3767	0.456272	0.650778		266.485	0.63919	0.20287	0.357265		266.485	-0.310017	0.54108	0.792882
NCU01808	0	3070.27	1.97871	0.0614063	0.109216		3070.27	0.677903	0.521665	0.636878		3070.27	1.28609	0.22409	0.340859		3070.27	-0.0220749	0.983355	0.991725		3070.27	0.182845	0.862774	0.920244		3070.27	-1.90228	0.0723712	0.282339
NCU01809	0	127.374	1.17813	0.000631723	0.00206983		127.374	0.449914	0.198365	0.309233		127.374	1.04836	0.00245495	0.00965606		127.374	-0.353028	0.328721	0.536621		127.374	0.03528	0.918417	0.952341		127.374	-0.332304	0.350677	0.653425
NCU01810	0	1237.58	-1.7728	2.33211e-07	1.82736e-06		1237.58	-1.12349	0.000990305	0.00427221		1237.58	-0.512906	0.131893	0.226766		1237.58	0.479862	0.157427	0.329914		1237.58	-0.125473	0.711363	0.824097		1237.58	-0.717426	0.0349545	0.185218
NCU01811	0	82.5631	0.808858	0.00124174	0.00372677		82.5631	0.943233	0.00012703	0.000755089		82.5631	1.48088	6.06323e-10	1.50966e-08		82.5631	1.42036	2.95731e-09	1.47067e-07		82.5631	0.718279	0.00199284	0.00984061		82.5631	0.284255	0.266574	0.567865
NCU01812	0	55.9986	-0.244595	0.649608	0.750657		55.9986	-0.864472	0.116665	0.206406		55.9986	-1.30752	0.0219565	0.0562568		55.9986	1.47967	0.00436582	0.023254		55.9986	0.380216	0.4633	0.625052		55.9986	-1.56118	0.00577686	0.0590168
NCU01813	0	608.799	-0.162628	0.302788	0.412572		608.799	-0.178964	0.256009	0.374147		608.799	-0.0758507	0.630759	0.730269		608.799	-0.0106284	0.946096	0.975355		608.799	-0.109185	0.476726	0.635467		608.799	-0.0986434	0.527523	0.784164
NCU01814	0	410.253	-1.49909	3.20018e-09	3.56597e-08		410.253	-1.73668	9.06397e-12	2.94546e-10		410.253	-1.14434	5.22513e-06	5.00378e-05		410.253	-1.00218	6.08516e-05	0.000738498		410.253	-1.14746	2.94657e-06	3.93425e-05		410.253	-0.0630347	0.796918	0.921027
NCU01815	0	395.201	-0.644634	0.0702569	0.121947		395.201	-0.12757	0.718559	0.800966		395.201	-0.651758	0.0675308	0.135568		395.201	-0.488058	0.169861	0.347777		395.201	-0.616837	0.0801047	0.183242		395.201	0.26122	0.458638	0.738229
NCU01816	0	1233.15	0.640832	0.00357619	0.00940984		1233.15	0.616448	0.00505915	0.0165633		1233.15	0.699766	0.00146922	0.00630129		1233.15	0.29904	0.1752	0.355037		1233.15	0.471305	0.0313092	0.0901732		1233.15	0.271118	0.217959	0.51129
NCU01817	0	576.802	0.099197	0.435372	0.551489		576.802	-0.095343	0.456316	0.579342		576.802	0.161053	0.20586	0.319901		576.802	0.180486	0.154772	0.326964		576.802	0.193854	0.111316	0.232166		576.802	-0.0573877	0.649558	0.851094
NCU01818	0	188.523	0.271054	0.430603	0.546841		188.523	-0.594159	0.0887064	0.167359		188.523	-0.690534	0.0493296	0.105652		188.523	-0.919399	0.00921632	0.0416225		188.523	-0.505795	0.139341	0.272844		188.523	-0.436768	0.207054	0.496832
NCU01819	0	128.218	-1.09144	0.00736984	0.0176165		128.218	-0.688503	0.085958	0.163324		128.218	-0.785222	0.0519819	0.109889		128.218	-0.151463	0.702514	0.839148		128.218	-0.272193	0.485161	0.643372		128.218	0.213495	0.585842	0.816442
NCU01820	0	1437.93	0.206457	0.117618	0.188641		1437.93	0.333114	0.0113038	0.0321992		1437.93	0.184441	0.16295	0.266823		1437.93	0.166633	0.207155	0.399667		1437.93	0.150894	0.245944	0.409193		1437.93	0.114162	0.385194	0.685057
NCU01821	0	1694.25	0.707438	0.00620799	0.0151996		1694.25	1.0424	5.40008e-05	0.000369883		1694.25	0.997401	0.000112918	0.000728528		1694.25	0.443749	0.086437	0.217614		1694.25	0.776199	0.00259532	0.0122412		1694.25	-0.07416	0.774672	0.909777
NCU01822	0	471.137	0.304719	0.167662	0.253424		471.137	0.182448	0.409219	0.534045		471.137	0.114071	0.607495	0.710741		471.137	0.394908	0.073432	0.193604		471.137	0.309781	0.154399	0.293807		471.137	-0.151634	0.493631	0.760267
NCU01823	0	661.644	0.121536	0.307781	0.417924		661.644	0.145771	0.219293	0.33369		661.644	0.210762	0.0768854	0.150247		661.644	-0.10215	0.397346	0.600985		661.644	-0.0834422	0.468552	0.629604		661.644	-0.124438	0.295114	0.599302
NCU01824	0	3251.98	0.499159	0.0414783	0.0782608		3251.98	0.870094	0.000374745	0.00191245		3251.98	0.903714	0.000220903	0.00127702		3251.98	1.14043	3.1016e-06	6.03597e-05		3251.98	1.04024	2.04477e-05	0.000210649		3251.98	-0.0688415	0.778746	0.912085
NCU01826	0	787.76	0.357528	0.0190295	0.0400791		787.76	-0.0800881	0.602416	0.705921		787.76	0.0492162	0.749014	0.826533		787.76	-0.219476	0.156063	0.328168		787.76	-0.145864	0.333411	0.503434		787.76	-0.107891	0.480674	0.750792
NCU01827	0	12540.7	0.963949	0.000151552	0.000598649		12540.7	0.478815	0.0599047	0.121944		12540.7	0.74001	0.00363736	0.0131765		12540.7	0.023458	0.926582	0.966784		12540.7	0.21068	0.407596	0.576175		12540.7	-0.0404297	0.873793	0.95098
NCU01828	0	134.248	1.29706	1.97559e-14	5.75444e-13		134.248	0.244139	0.186961	0.29552		134.248	0.12901	0.499601	0.617878		134.248	0.439765	0.0162917	0.0645337		134.248	0.58082	0.000423445	0.00269462		134.248	0.491745	0.00527858	0.0551637
NCU01829	0	17.7731	0.187409	0.950392	0.971996		17.7731	-5.19903	0.117204	0.20707		17.7731	3.5442	0.236053	0.355084		17.7731	-0.681771	0.822126	0.906917		17.7731	0.647804	0.828827	0.90144		17.7731	-5.43194	0.101673	0.342058
NCU01830	0	43.8465	2.01379	0.00023268	0.00087545	up	43.8465	1.46757	0.0081652	0.0248015		43.8465	3.22561	1.81123e-09	4.07365e-08	up	43.8465	0.942876	0.0975995	0.237027		43.8465	0.898287	0.100012	0.214272		43.8465	-1.09307	0.0947569	0.329554
NCU01831	0	173.348	-0.0871868	0.620342	0.726377		173.348	0.257814	0.12973	0.223613		173.348	-0.110211	0.535298	0.649307		173.348	-0.0944962	0.592571	0.762456		173.348	-0.0149379	0.92653	0.957847		173.348	-0.224473	0.195696	0.483829
NCU01833	0	1164.58	-2.08084	3.84236e-17	1.60792e-15	down	1164.58	-1.42144	6.376e-09	1.19401e-07		1164.58	-1.11516	5.05669e-06	4.85299e-05		1164.58	-0.638211	0.00873865	0.0400467		1164.58	-1.12748	3.32312e-06	4.39716e-05		1164.58	-0.551335	0.0231726	0.14406
NCU01834	0	2.03382	-2.04038	0.243697	0.345926		2.03382	-0.555216	0.674437	0.76457		2.03382	-0.0017857	0.998866	1		2.03382	-0.0129399	0.991738	1		2.03382	-0.2408	0.832976	0.903728		2.03382	-1.38845	0.339107	1
NCU01835	0	7590.51	-0.423007	0.0547034	0.0990408		7590.51	-0.51777	0.0186972	0.0482242		7590.51	0.235523	0.284378	0.409784		7590.51	-0.109864	0.617643	0.780556		7590.51	-0.163098	0.458164	0.620962		7590.51	0.271988	0.216169	0.509673
NCU01837	0	5.67011	-4.73766	0.0158049	0.0341045	down	5.67011	-2.51975	0.0938157	0.175109		5.67011	-6.11295	0.00202083	0.00818612	down	5.67011	-3.14593	0.0482138	0.142713		5.67011	-2.9727	0.0404625	0.109889		5.67011	-2.72054	0.0698325	0.277821
NCU01838	0	862.802	-0.670491	0.00965176	0.022266		862.802	0.1817	0.47939	0.599946		862.802	0.1354	0.598664	0.702958		862.802	0.0163218	0.949436	0.977334		862.802	0.0691758	0.786718	0.873154		862.802	-0.53104	0.0394521	0.198999
NCU01839	0	371.565	-1.1316	9.25741e-05	0.000392539		371.565	-0.234943	0.40603	0.531116		371.565	-0.442215	0.120447	0.211362		371.565	0.229926	0.41345	0.613978		371.565	0.133915	0.630157	0.7623		371.565	0.661779	0.0176318	0.12193
NCU01840	0	132.606	-0.259924	0.460742	0.577086		132.606	-0.576214	0.104635	0.190029		132.606	-0.87723	0.0151805	0.0419314		132.606	-0.812944	0.0237231	0.0848949		132.606	-0.565771	0.101727	0.217242		132.606	0.445678	0.196494	0.484538
NCU01841	0	20.5237	-0.647428	0.13654	0.213383		20.5237	-0.213786	0.596948	0.701378		20.5237	-1.05938	0.0254724	0.0632802		20.5237	-0.441348	0.297003	0.503379		20.5237	-0.687071	0.0675053	0.161658		20.5237	0.452614	0.218011	0.51129
NCU01842	0	180.358	1.10743	5.36347e-07	3.88791e-06		180.358	1.40005	1.32977e-10	3.51911e-09		180.358	0.963169	1.59371e-05	0.000133145		180.358	0.529792	0.0200228	0.0753293		180.358	0.857438	6.37257e-05	0.000548997		180.358	0.612575	0.00597219	0.0600899
NCU01843	0	1816.32	0.708527	0.000617911	0.00203346		1816.32	0.699428	0.000723142	0.00332044		1816.32	0.653511	0.0016027	0.00676193		1816.32	0.713577	0.000565536	0.00448541		1816.32	0.849726	3.71644e-05	0.000347615		1816.32	-0.17672	0.394895	0.689674
NCU01844	0	41.3438	-0.80938	0.303642	0.413441		41.3438	-1.52287	0.05654	0.116304		41.3438	-1.07482	0.175069	0.28207		41.3438	-1.19551	0.132054	0.292194		41.3438	-1.24122	0.110707	0.231443		41.3438	-1.52574	0.0545964	0.238236
NCU01845	0	1369.01	-1.01391	0.0238435	0.0487086		1369.01	-0.861554	0.054713	0.11347		1369.01	-0.39339	0.380062	0.507232		1369.01	-0.316107	0.480496	0.673099		1369.01	-0.310979	0.487038	0.644667		1369.01	-0.319685	0.475325	0.747805
NCU01846	0	819.855	-1.64812	7.19636e-29	9.44695e-27		819.855	-1.91396	1.06061e-37	8.52252e-35		819.855	-1.54001	1.83491e-25	3.52582e-23		819.855	-1.60547	1.64391e-27	1.01605e-24		819.855	-1.77592	2.16934e-35	2.73926e-32		819.855	-0.83502	5.09796e-09	8.26132e-07
NCU01849	0	429.186	6.12533	5.49161e-13	1.253e-11	up	429.186	3.84973	5.99568e-06	5.46349e-05	up	429.186	3.18743	0.000182088	0.00109265	up	429.186	1.0368	0.22825	0.423921		429.186	1.57802	0.0641204	0.155404		429.186	-1.29851	0.146571	0.419246
NCU01850	0	308.604	-0.971843	0.00013358	0.000536053		308.604	-0.9601	0.000153821	0.000883445		308.604	-0.474499	0.058616	0.12111		308.604	-0.0323445	0.896143	0.950118		308.604	-0.242236	0.320647	0.490685		308.604	0.0802347	0.74406	0.894253
NCU01851	0	8.30971	-2.29125	0.0217034	0.0448918	down	8.30971	0.30269	0.638137	0.735684		8.30971	-0.809901	0.282408	0.40761		8.30971	0.317443	0.624574	0.784869		8.30971	0.133174	0.824698	0.898625		8.30971	-0.870708	0.224742	0.518553
NCU01852	0	19.6468	1.78628	0.000277172	0.00101573		19.6468	1.08146	0.0332542	0.0763267		19.6468	-0.781924	0.216455	0.331873		19.6468	0.21916	0.690127	0.83032		19.6468	0.47262	0.338716	0.508779		19.6468	0.514457	0.32227	0.628629
NCU01853	0	5.11313	-0.892645	0.339777	0.4528		5.11313	-1.182	0.218448	0.332868		5.11313	-1.31823	0.187177	0.296639		5.11313	-2.10087	0.0626103	0.172978		5.11313	-2.15725	0.0221557	0.0679507		5.11313	-0.0114012	0.989205	0.997164
NCU01854	0	922.097	-1.22208	4.10412e-08	3.72441e-07		922.097	-0.763753	0.000549829	0.00265426		922.097	-0.45997	0.0371057	0.0849446		922.097	-0.482173	0.0288125	0.0976556		922.097	-0.558297	0.01068	0.0380481		922.097	-0.622903	0.00466201	0.0507426
NCU01855	0	425.861	1.27409	0.00173595	0.0049897		425.861	-0.540839	0.18762	0.29635		425.861	-0.0830957	0.839183	0.892411		425.861	-0.299906	0.464439	0.656909		425.861	-1.03936	0.0109739	0.0388928		425.861	-1.45473	0.000435569	0.0104986
NCU01856	0	7439.05	-2.01005	1.71538e-15	5.76789e-14	down	7439.05	-0.863001	0.000612478	0.00290123		7439.05	-0.59747	0.0176811	0.0473555		7439.05	0.0582694	0.816919	0.904213		7439.05	-0.301916	0.230101	0.391202		7439.05	-0.737722	0.00339096	0.0416789
NCU01857	0	608.278	-0.71793	2.0545e-06	1.29528e-05		608.278	-0.693066	4.18909e-06	3.96863e-05		608.278	-0.757069	6.39913e-07	7.80164e-06		608.278	-0.404056	0.00686923	0.0333181		608.278	-0.501699	0.00054609	0.0033371		608.278	0.0556227	0.70339	0.878613
NCU01858	0	58.7933	0.493721	0.0503871	0.0922191		58.7933	0.390552	0.123004	0.214615		58.7933	0.491629	0.0536112	0.112772		58.7933	0.159602	0.5444	0.725603		58.7933	0.115484	0.622923	0.757066		58.7933	0.419446	0.0888593	0.318253
NCU01859	0	2218.05	-0.515897	9.55611e-06	5.20615e-05		2218.05	0.0794838	0.489977	0.608787		2218.05	0.0316646	0.783955	0.85138		2218.05	0.0307988	0.789537	0.887559		2218.05	0.122794	0.280534	0.449128		2218.05	0.222823	0.0518087	0.23228
NCU01860	0	26.0101	0.309517	0.561263	0.671987		26.0101	-0.590933	0.294193	0.414798		26.0101	0.744104	0.155579	0.257569		26.0101	-0.0796502	0.88405	0.942892		26.0101	-0.104999	0.838655	0.906995		26.0101	-0.373446	0.493044	0.760055
NCU01861	0	526.671	-2.77641	0.00455107	0.0116084	down	526.671	-1.1037	0.257128	0.374979		526.671	-2.00229	0.0402312	0.090209		526.671	0.02733	0.977591	0.990317		526.671	-0.404212	0.677687	0.799743		526.671	0.255868	0.792501	0.91936
NCU01862	0	345.845	-0.586419	0.179662	0.268847		345.845	-1.13822	0.00953266	0.0279838		345.845	-0.867686	0.0478469	0.103252		345.845	-0.0835099	0.84797	0.922145		345.845	-0.463023	0.286009	0.45501		345.845	-0.480919	0.269778	0.571794
NCU01863	0	0.384984	-1.88788	0.718971	0.805177		0.384984	-1.9585	0.708953	1		0.384984	-1.80346	0.731061	1		0.384984	0.559203	0.91351	1		0.384984	-3.08183	0.556967	1		0.384984	-2.19141	0.676202	1
NCU01865	0	80.8123	-1.54629	2.66654e-07	2.05744e-06		80.8123	-1.17559	3.80268e-05	0.000272823		80.8123	-1.12758	9.3948e-05	0.000617862		80.8123	-0.673267	0.0142116	0.0576795		80.8123	-0.919759	0.000350521	0.00230868		80.8123	0.169449	0.50615	0.769105
NCU01866	0	6.35787	1.85869	0.0463143	0.0858473		6.35787	-0.508253	0.642471	0.738658		6.35787	-0.116967	0.912623	0.944355		6.35787	0.423981	0.67429	0.818068		6.35787	0.231766	0.806975	0.886189		6.35787	0.836571	0.384258	0.684435
NCU01867	0	14.0902	-1.22576	0.120692	0.192668		14.0902	-0.161473	0.816311	0.87385		14.0902	-1.58329	0.0614222	0.125878		14.0902	1.34548	0.0355508	0.114349		14.0902	0.173564	0.785905	0.873075		14.0902	0.959977	0.134488	0.399767
NCU01868	0	108.188	-1.9682	0.000772782	0.00246935		108.188	-1.64791	0.00438267	0.0146736		108.188	-1.5844	0.00628337	0.0206157		108.188	-0.326489	0.563479	0.741001		108.188	-0.801092	0.153403	0.292701		108.188	0.445747	0.425892	0.713362
NCU01869	0	40.7168	0.959446	0.00228935	0.00636094		40.7168	1.14242	0.000221064	0.00121215		40.7168	0.331046	0.322845	0.449602		40.7168	-0.314751	0.381232	0.586734		40.7168	-0.511255	0.111752	0.23291		40.7168	-0.448871	0.199973	0.488391
NCU01870	0	69.2002	-0.830984	0.139235	0.216816		69.2002	-0.15378	0.780855	0.8477		69.2002	-0.242391	0.662442	0.757171		69.2002	-0.685226	0.221268	0.415592		69.2002	-1.42712	0.0100311	0.0363083		69.2002	-0.792	0.15519	0.428881
NCU01871	0	16730.6	-1.13846	8.78159e-07	6.04989e-06		16730.6	-0.234708	0.31032	0.431888		16730.6	0.150799	0.514449	0.630857		16730.6	0.377258	0.102859	0.245862		16730.6	0.246984	0.285423	0.454621		16730.6	0.0198035	0.931766	0.975154
NCU01873	0	1289.4	-3.01906	1.32437e-09	1.5904e-08	down	1289.4	-1.17882	0.0163452	0.0435542		1289.4	-0.751585	0.125458	0.217907		1289.4	1.56958	0.00132302	0.00886075		1289.4	0.698018	0.153232	0.292467		1289.4	-0.0506865	0.917512	0.970211
NCU01874	0	46.2834	0.0527155	0.924965	0.954651		46.2834	-0.361747	0.522191	0.637168		46.2834	-1.13088	0.0543821	0.114122		46.2834	-1.7201	0.00470041	0.024704		46.2834	-1.22821	0.0285857	0.0839431		46.2834	0.599584	0.276109	0.578693
NCU01875	0	0.159266	2.19494	0.67858	0.772991		0.159266	0	1	1		0.159266	2.28189	0.666649	1		0.159266	0	1	1		0.159266	0	1	1		0.159266	0	1	1
NCU01876	0	1.05981	2.42438	0.641469	0.743237		1.05981	4.92545	0.335927	1		1.05981	0.138768	0.979114	1		1.05981	0.0836791	0.987405	1		1.05981	-1.1396	0.829775	1		1.05981	-0.249178	0.962507	1
NCU01877	0	2.64022	1.22705	0.319262	0.430559		2.64022	2.32007	0.0367184	0.082731		2.64022	-0.699892	0.687686	0.776303		2.64022	2.39936	0.030958	1		2.64022	0.835894	0.463272	0.625052		2.64022	0.502745	0.699102	1
NCU01878	0	730.798	-0.695372	0.0167551	0.0359204		730.798	-0.519623	0.0732318	0.143908		730.798	-0.425696	0.142413	0.240503		730.798	-0.320807	0.268341	0.471081		730.798	-0.421434	0.143495	0.278637		730.798	-0.455227	0.115739	0.367385
NCU01879	0	1149.83	-0.592719	0.00281247	0.00762431		1149.83	-0.414997	0.0359142	0.0812713		1149.83	-0.465279	0.0189517	0.050109		1149.83	-0.4055	0.0405699	0.126164		1149.83	-0.494493	0.0117179	0.0410034		1149.83	0.0664081	0.735498	0.890605
NCU01880	0	10.5416	-1.21473	0.141226	0.219525		10.5416	-2.26683	0.0159969	0.0428013	down	10.5416	-1.63116	0.0628011	0.12805		10.5416	0.0916767	0.902381	0.953576		10.5416	-0.0325723	0.963718	0.978665		10.5416	-0.855171	0.271418	0.572964
NCU01881	0	822.26	-0.231665	0.232738	0.332885		822.26	0.281329	0.143509	0.242263		822.26	-0.0951941	0.623534	0.724149		822.26	0.180636	0.348934	0.555943		822.26	0.105339	0.580357	0.723931		822.26	0.63545	0.000882127	0.0172693
NCU01882	0	720.551	-0.114855	0.786623	0.857577		720.551	-0.142486	0.736978	0.814065		720.551	-0.34228	0.42031	0.544898		720.551	-1.31777	0.00201366	0.0125534		720.551	-1.12828	0.00780263	0.0300059		720.551	-0.943035	0.0265226	0.157082
NCU01883	0	716.364	-2.40945	1.41811e-08	1.40826e-07	down	716.364	-2.20651	1.94315e-07	2.67115e-06	down	716.364	-1.90452	6.89119e-06	6.37814e-05		716.364	-1.64161	0.000102957	0.00112628		716.364	-1.98344	2.49579e-06	3.38868e-05		716.364	-1.47054	0.000489217	0.0112851
NCU01884	0	54.0999	-0.602362	0.099001	0.163828		54.0999	-0.387971	0.277842	0.39808		54.0999	-0.80005	0.0324877	0.0766164		54.0999	-0.189733	0.593149	0.763043		54.0999	-0.470757	0.164711	0.307536		54.0999	-0.179228	0.606561	0.827572
NCU01886	0	4639.68	-1.74698	0.000261034	0.000964707		4639.68	-1.07059	0.0251828	0.0613028		4639.68	-0.974472	0.0415943	0.0924541		4639.68	-1.35996	0.00446846	0.0236054		4639.68	-1.09272	0.0222701	0.0682543		4639.68	-1.82067	0.00014132	0.00454587
NCU01888	0	133.017	1.24313	0.000892301	0.00279808		133.017	0.392127	0.300501	0.421474		133.017	0.265485	0.485964	0.605332		133.017	-0.696461	0.0758419	0.198266		133.017	-0.382148	0.309978	0.480363		133.017	-0.756724	0.0512611	0.230499
NCU01889	0	204.841	-0.148037	0.628687	0.732487		204.841	0.453014	0.132463	0.22748		204.841	0.125104	0.681162	0.771488		204.841	0.359694	0.23412	0.432041		204.841	0.359671	0.22543	0.385901		204.841	0.027774	0.926802	0.973024
NCU01891	0	142.779	-2.04772	9.18356e-08	7.87879e-07	down	142.779	-0.727375	0.0393542	0.087532		142.779	0.314046	0.361153	0.489081		142.779	0.39937	0.244139	0.443217		142.779	0.407822	0.226505	0.386716		142.779	-0.657211	0.0598844	0.252278
NCU01893	0	327.861	-0.64234	0.0282355	0.0561954		327.861	0.196417	0.493053	0.611722		327.861	0.891561	0.00171133	0.00713174		327.861	0.759098	0.00763632	0.036167		327.861	0.805383	0.00421845	0.0181636		327.861	-0.973149	0.00089706	0.0174826
NCU01894	0	558.03	2.02557	0.000579185	0.00192787	up	558.03	1.28501	0.0291744	0.0687293		558.03	1.2467	0.0343968	0.0801639		558.03	-0.112908	0.848665	0.922318		558.03	0.441598	0.453336	0.617322		558.03	-0.457481	0.439449	0.725207
NCU01895	0	761.901	-0.813913	0.0294576	0.0582767		761.901	-0.88233	0.0182596	0.0472748		761.901	-0.633465	0.0899934	0.169461		761.901	-0.692847	0.063691	0.175025		761.901	-0.710031	0.0563744	0.14112		761.901	-0.954809	0.0105791	0.0866041
NCU01896	0	92.8446	-1.38513	4.88678e-08	4.38483e-07		92.8446	-1.24013	5.37423e-07	6.67174e-06		92.8446	-1.31743	2.24642e-07	3.07847e-06		92.8446	-1.22555	9.35777e-07	2.22453e-05		92.8446	-1.02117	3.92939e-06	5.07045e-05		92.8446	-0.289678	0.194619	0.483032
NCU01897	0	436.115	-1.07836	3.59294e-06	2.17368e-05		436.115	-1.48339	2.88427e-10	7.12125e-09		436.115	-0.410062	0.0739147	0.145671		436.115	-0.640792	0.00539521	0.0275589		436.115	-0.651147	0.0039699	0.0173148		436.115	-0.577267	0.0115325	0.0912954
NCU01898	0	1096.68	-3.71594	1.94185e-30	2.95376e-28	down	1096.68	-3.53128	6.83033e-28	1.82949e-25	down	1096.68	-2.87626	2.66439e-19	2.6762e-17	down	1096.68	-2.61336	2.6272e-16	4.54663e-14	down	1096.68	-3.12082	8.06397e-23	2.0964e-20	down	1096.68	-1.29671	4.07726e-05	0.00180926
NCU01899	0	96.5696	-2.46059	1.78869e-05	9.0934e-05	down	96.5696	-3.90194	4.80384e-10	1.12929e-08	down	96.5696	-1.97206	0.000481952	0.0024825		96.5696	-1.01584	0.0653504	0.178159		96.5696	-1.57328	0.00397072	0.0173148		96.5696	-0.250427	0.645214	0.848609
NCU01900	0	39.3751	-0.805383	0.0553501	0.100023		39.3751	0.282892	0.452883	0.575911		39.3751	0.178819	0.641543	0.74019		39.3751	-0.126034	0.747998	0.864676		39.3751	0.394346	0.266312	0.432867		39.3751	0.310669	0.401908	0.695125
NCU01901	0	670.753	-2.7869	9.92869e-08	8.46501e-07	down	670.753	-1.6362	0.00160022	0.00637708		670.753	-2.03829	8.88786e-05	0.000588463	down	670.753	-0.639689	0.21583	0.409287		670.753	-0.727625	0.15836	0.299193		670.753	-0.205491	0.690495	0.870531
NCU01902	0	845.465	0.17501	0.322499	0.434031		845.465	0.617598	0.000425215	0.00213634		845.465	0.567874	0.00123999	0.0054692		845.465	0.925265	1.18695e-07	3.8181e-06		845.465	1.00848	5.25711e-09	1.49895e-07		845.465	-0.231352	0.191949	0.480755
NCU01903	0	197.812	-2.87076	1.61578e-09	1.91781e-08	down	197.812	-2.66576	1.51143e-08	2.62983e-07	down	197.812	-1.46503	0.00139685	0.00603165		197.812	-0.878101	0.0532115	0.153736		197.812	-1.43772	0.00144785	0.00752356		197.812	-0.394997	0.381036	0.681334
NCU01904	0	831.688	-2.4451	6.22327e-05	0.000277255	down	831.688	0.124818	0.83535	0.888384		831.688	0.370286	0.537419	0.651254		831.688	1.7327	0.00383571	0.0208745		831.688	1.73366	0.00379316	0.0167054		831.688	0.946929	0.114226	0.365173
NCU01905	0	458.387	-4.79394	2.1052e-09	2.43649e-08	down	458.387	-1.97433	0.0106936	0.0307385		458.387	-1.84741	0.0169296	0.0457477		458.387	-1.46752	0.057442	0.162486		458.387	-1.05192	0.172023	0.316925		458.387	0.451904	0.557206	0.799559
NCU01906	0	324.634	-2.86126	2.60546e-05	0.000127323	down	324.634	-2.12154	0.00167588	0.00663076	down	324.634	-2.49747	0.000231065	0.0013245	down	324.634	-2.0772	0.00210104	0.0129397	down	324.634	-1.87587	0.00516869	0.02139		324.634	0.389756	0.560255	0.800906
NCU01907	0	567.04	-1.81486	1.6202e-14	4.82184e-13		567.04	-1.77506	5.0376e-14	2.39394e-12		567.04	-1.63966	3.56388e-12	1.23051e-10		567.04	-1.23958	1.08755e-07	3.54443e-06		567.04	-1.43285	4.6897e-10	1.67823e-08		567.04	-0.842049	0.000263362	0.0073512
NCU01908	0	702.762	-1.46361	5.15283e-07	3.74372e-06		702.762	-1.49138	3.07925e-07	4.03221e-06		702.762	-1.31222	6.62881e-06	6.1611e-05		702.762	-0.971991	0.000801283	0.00591596		702.762	-1.23086	1.9094e-05	0.000199023		702.762	-0.0346661	0.904021	0.96397
NCU01910	0	485.962	-1.18144	3.49697e-10	4.76015e-09		485.962	-1.08263	7.03423e-09	1.30621e-07		485.962	-1.00139	9.27969e-08	1.39022e-06		485.962	-0.59837	0.00117871	0.00802675		485.962	-0.639054	0.000379146	0.00246236		485.962	-0.101742	0.573673	0.809537
NCU01911	0	2019.14	-3.29955	2.38846e-58	2.54318e-55	down	2019.14	-2.29704	2.79481e-30	9.14939e-28	down	2019.14	-2.06626	7.32705e-25	1.19933e-22	down	2019.14	-1.27889	1.34107e-10	8.92636e-09		2019.14	-1.81872	4.84901e-20	9.11924e-18		2019.14	-0.933896	2.51031e-06	0.000185656
NCU01912	0	2933.31	-1.13249	9.01507e-14	2.3349e-12		2933.31	-0.803476	1.10683e-07	1.60645e-06		2933.31	-0.731086	1.38714e-06	1.5711e-05		2933.31	-0.605152	6.30154e-05	0.000760491		2933.31	-0.706807	2.59028e-06	3.48485e-05		2933.31	-0.652247	1.55349e-05	0.0008562
NCU01913	0	393.416	-0.0709382	0.615742	0.722323		393.416	-0.0372643	0.790875	0.854798		393.416	-0.257918	0.0728285	0.144011		393.416	-0.324602	0.024069	0.0858841		393.416	-0.133857	0.320532	0.49068		393.416	-0.0810952	0.560023	0.800853
NCU01914	0	994.034	0.0673093	0.658721	0.758018		994.034	-0.293892	0.0551978	0.114307		994.034	-0.318029	0.0387919	0.0876935		994.034	-0.176456	0.249434	0.448907		994.034	-0.0308429	0.83739	0.906289		994.034	-0.19015	0.211756	0.503366
NCU01916	0	180.326	1.11545	0.00222878	0.00621969		180.326	-0.278551	0.45306	0.576013		180.326	-0.0767526	0.83605	0.890607		180.326	-1.42001	0.000229453	0.00212348		180.326	-1.52985	3.95762e-05	0.000365531		180.326	-0.718571	0.0539594	0.237251
NCU01917	0	17.3561	-0.0270707	0.951455	0.972772		17.3561	-2.74381	4.15806e-05	0.000293555	down	17.3561	-1.48773	0.00567078	0.0190513		17.3561	-1.0558	0.0344902	0.111861		17.3561	-1.42664	0.00163082	0.00834673		17.3561	-1.03119	0.0306443	0.172297
NCU01918	0	947.169	-0.426927	0.00332285	0.00882319		947.169	-0.306219	0.0342458	0.0783382		947.169	-0.103081	0.475449	0.595339		947.169	0.0704787	0.62371	0.784215		947.169	-0.00466657	0.973624	0.984653		947.169	0.0258768	0.856239	0.942713
NCU01919	0	906.139	0.321664	0.0906138	0.151836		906.139	0.494071	0.00913448	0.0270213		906.139	0.124562	0.514059	0.630466		906.139	0.32295	0.0894482	0.222861		906.139	0.532596	0.00455993	0.019331		906.139	0.0314745	0.868468	0.948366
NCU01920	0	105.4	-0.696377	0.00240209	0.00664145		105.4	-0.156647	0.464833	0.586781		105.4	-0.424563	0.0582655	0.120611		105.4	-0.0667911	0.755514	0.868766		105.4	-0.0672858	0.732288	0.837023		105.4	0.388286	0.0540251	0.237288
NCU01922	0	190.118	0.578449	0.122921	0.195575		190.118	0.671907	0.0725936	0.142844		190.118	-0.051881	0.891233	0.929497		190.118	0.100279	0.790726	0.88836		190.118	-0.0706782	0.849631	0.913345		190.118	-0.58836	0.122167	0.378371
NCU01923	0	0.559508	1.55236	0.692364	0.783529		0.559508	1.59617	0.683404	1		0.559508	-0.807332	0.842157	1		0.559508	0.59845	0.882536	1		0.559508	-0.54798	0.89197	1		0.559508	-1.19528	0.768127	1
NCU01924	0	1768.83	-1.28892	4.6409e-07	3.39235e-06		1768.83	-1.25828	8.45972e-07	9.93034e-06		1768.83	-0.391526	0.123866	0.215862		1768.83	0.253511	0.317862	0.525409		1768.83	-0.0942134	0.70997	0.823871		1768.83	-0.574332	0.0238739	0.147033
NCU01926	0	114.872	-2.17971	0.00378507	0.00987507	down	114.872	-1.14707	0.120752	0.21177		114.872	-0.618964	0.400689	0.52743		114.872	-0.646661	0.379828	0.585565		114.872	-0.369351	0.613117	0.749667		114.872	-0.10626	0.884617	0.956465
NCU01927	0	688.437	-0.238229	0.042517	0.0798659		688.437	-0.0355419	0.75894	0.830026		688.437	-0.292704	0.0134247	0.0379352		688.437	0.140092	0.224744	0.419843		688.437	-0.0290149	0.794577	0.877688		688.437	-0.130358	0.257343	0.555667
NCU01928	0	390.237	-0.631887	0.025617	0.0519001		390.237	-0.618225	0.0287369	0.067946		390.237	-0.511165	0.0707898	0.140704		390.237	0.0151071	0.95702	0.981584		390.237	-0.209482	0.450638	0.615069		390.237	-0.285504	0.308251	0.612445
NCU01929	0	785.546	-1.15756	1.71578e-07	1.3817e-06		785.546	-0.838106	0.000139555	0.000820712		785.546	-0.91905	3.15676e-05	0.00024054		785.546	-0.752572	0.000626778	0.0048621		785.546	-0.816212	0.000175389	0.00129405		785.546	-0.466967	0.0325649	0.177894
NCU01930	0	475.972	-0.250918	0.10233	0.168435		475.972	0.461874	0.00180825	0.00704103		475.972	0.392375	0.00860392	0.0265631		475.972	0.271422	0.0699248	0.187093		475.972	0.495479	0.000560819	0.00341397		475.972	0.39705	0.00697266	0.0663294
NCU01931	0	50.1009	0.230325	0.612781	0.719465		50.1009	0.313748	0.488035	0.607655		50.1009	-0.314931	0.502183	0.62029		50.1009	0.293449	0.518467	0.704497		50.1009	-0.202168	0.648998	0.777361		50.1009	0.0793924	0.860708	0.944541
NCU01932	0	573.585	-0.0141351	0.908088	0.943226		573.585	-0.43326	0.000536306	0.00260319		573.585	0.247407	0.041341	0.09209		573.585	0.126938	0.296853	0.503365		573.585	0.331107	0.0042121	0.0181525		573.585	-0.0762757	0.528066	0.784164
NCU01935	0	135.555	-1.47369	1.4923e-06	9.65615e-06		135.555	-1.208	5.51041e-05	0.000376578		135.555	-0.425193	0.142883	0.241129		135.555	-0.518746	0.0743099	0.195382		135.555	-0.704112	0.0123543	0.0428233		135.555	-0.288874	0.310586	0.615411
NCU01936	0	238.556	-0.00775179	0.974301	0.98885		238.556	-0.0896538	0.709593	0.793734		238.556	-0.214533	0.37785	0.504962		238.556	-0.1641	0.498145	0.68824		238.556	-0.181558	0.43886	0.604595		238.556	0.551743	0.0189915	0.127095
NCU01938	0	740.61	-0.637111	0.00453743	0.011586		740.61	-0.619967	0.00568624	0.0183233		740.61	-0.353351	0.114405	0.203466		740.61	-0.764094	0.000685889	0.00522908		740.61	-0.684766	0.00200921	0.00989931		740.61	0.158168	0.475701	0.747999
NCU01939	0	1818.68	0.539166	0.0116599	0.0262292		1818.68	0.467133	0.0288711	0.0681784		1818.68	0.641751	0.00267823	0.010315		1818.68	0.40569	0.0579186	0.163407		1818.68	0.319379	0.133831	0.264994		1818.68	-0.20268	0.344233	0.648237
NCU01940	0	2003.52	-1.92074	6.36714e-15	2.01374e-13		2003.52	-1.39897	1.18781e-08	2.08728e-07		2003.52	-1.43723	4.89108e-09	1.00775e-07		2003.52	-1.38172	1.81581e-08	7.4114e-07		2003.52	-1.39476	1.13484e-08	3.01226e-07		2003.52	-0.382589	0.117219	0.369237
NCU01942	0	4.61878	0.805071	0.276978	0.3844		4.61878	-1.18485	0.220708	0.33485		4.61878	-0.196882	0.814635	0.875448		4.61878	-0.0602999	0.941202	0.973142		4.61878	-1.48857	0.0768343	0.177599		4.61878	-1.83613	0.0818922	0.304649
NCU01943	0	0.119732	0.0542801	0.991829	0.997555		0.119732	-0.0162927	0.997548	1		0.119732	0.138746	0.979118	1		0.119732	0.0836569	0.987408	1		0.119732	0.413632	0.937618	1		0.119732	-0.2492	0.962503	1
NCU01944	0	194.153	0.158901	0.678929	0.773164		194.153	-0.0915418	0.812028	0.870857		194.153	0.22538	0.557236	0.668487		194.153	-0.660224	0.0905043	0.224681		194.153	-0.512841	0.178907	0.326457		194.153	0.0711597	0.852534	0.941022
NCU01945	0	800.115	1.6567	1.64122e-08	1.61311e-07		800.115	1.94753	2.96017e-11	8.80976e-10		800.115	1.51914	2.33248e-07	3.1767e-06		800.115	1.74347	2.78752e-09	1.4258e-07		800.115	1.70771	5.03535e-09	1.44037e-07		800.115	0.347145	0.240404	0.536137
NCU01946	0	5.42281	-0.860856	0.317544	0.428837		5.42281	-0.914732	0.286515	0.406931		5.42281	-1.11141	0.228091	0.345758		5.42281	0.748888	0.272456	0.475987		5.42281	0.14912	0.817391	0.893731		5.42281	-0.0264683	0.970593	0.991563
NCU01947	0	400.429	-0.506262	0.0132339	0.0291944		400.429	-0.598036	0.0034527	0.0120483		400.429	-0.262986	0.195956	0.307593		400.429	-0.628948	0.00219648	0.0134224		400.429	-0.755185	0.000156952	0.00116973		400.429	-0.055155	0.783238	0.915488
NCU01948	0	12064.4	1.24114	1.54913e-05	8.02883e-05		12064.4	0.682802	0.0174499	0.0456872		12064.4	0.903082	0.00166629	0.00697364		12064.4	0.110749	0.699919	0.83756		12064.4	0.433436	0.131212	0.261566		12064.4	-0.0900362	0.754	0.897865
[truncated: 7,904 more rows]
