# Supplementary material for: The ACF chromatin-remodeling complex is essential for Polycomb repression
Source: eLife. 2022 Mar 8;11:e77595. doi: 10.7554/eLife.77595 (PMC9038196; doi:10.7554/eLife.77595)
Supplement: Figure 3—figure supplement 1—source data 1. [file elife-77595-fig3-figsupp1-data1.xlsx]

## Sheet: acf1
genes	logFC	FDR	Pvalue	acf1	wt	category
NCU06901	1.06428	1	0.00518711	37.2371	17.4109	Up
NCU00164	-1.89028	0.437981	0.000180054	6.19017	22.9098	Down
NCU01946	-1.58873	0.858482	0.000441152	9.26764	26.9418	Down
NCU01958	-5.5764	9.38731e-05	9.6478e-09	0.288116	17.82	Down
NCU01959	-6.87407	0.00197515	6.08987e-07	0	14.3784	Down
NCU01960	-6.83817	0.00197515	6.08987e-07	0	14.022	Down
NCU09968	-1.3608	1	0.0327495	5.39269	13.78	Down
NCU09969	-1.11198	1	0.0218484	9.22761	19.6041	Down
NCU00003	-0.044188	1	0.962945	34.3426	34.7827	Other
NCU00004	-0.0718995	1	0.959912	28.9999	30.0334	Other
NCU00005	0.0790563	1	0.924537	33.8246	31.446	Other
NCU00006	0.0379919	1	1	28.7035	27.5019	Other
NCU00007	-0.0536998	1	0.956865	24.9779	25.5213	Other
NCU00008	0.0665459	1	0.980145	30.4456	28.5466	Other
NCU00009	0.021201	1	0.983024	41.3493	39.9065	Other
NCU00010	-0.0292392	1	0.957691	26.288	26.3932	Other
NCU00011	0.00255596	1	1	13.4596	13.1472	Other
NCU00013	0.247676	1	0.458922	35.279	29.0088	Other
NCU00014	0.0250419	1	1	27.8874	26.9311	Other
NCU00015	-0.0745454	1	0.884921	21.9004	22.6439	Other
NCU00017	0.222749	1	0.594508	33.7057	28.3382	Other
NCU00018	-0.139087	1	0.823547	23.2161	25.1952	Other
NCU00019	-0.00502347	1	1	27.817	27.4456	Other
NCU00021	-0.114469	1	0.827079	24.2234	25.8223	Other
NCU00022	0.206753	1	0.600217	34.7672	29.6063	Other
NCU00023	-0.0389685	1	0.958472	27.0071	27.2805	Other
NCU00024	0.04201	1	1	26.6924	25.4916	Other
NCU00025	-0.106602	1	0.779412	27.7481	29.3191	Other
NCU00026	-0.128688	1	0.830407	24.9342	26.8087	Other
NCU00027	-0.177876	1	0.605243	26.3631	29.3815	Other
NCU00028	-0.235294	1	0.504951	26.0651	30.2281	Other
NCU00029	-0.102897	1	0.847004	31.0659	32.7886	Other
NCU00030	-0.0581066	1	0.897868	27.9331	28.4922	Other
NCU00031	-0.0620588	1	0.912226	37.7899	38.8145	Other
NCU00032	0.016821	1	1	33.2476	32.3332	Other
NCU00033	-0.269761	1	0.446523	24.7165	29.2731	Other
NCU00034	0.0272642	1	1	37.5056	36.1755	Other
NCU00035	-0.124851	1	0.71532	26.3687	28.2737	Other
NCU00037	0.000515532	1	1	27.3401	26.8541	Other
NCU00038	0.0760866	1	0.92215	31.9028	29.7437	Other
NCU00039	0.0761014	1	0.868846	34.2132	31.7985	Other
NCU00040	0.0452401	1	0.9768	22.0994	21.1062	Other
NCU00041	-0.0700337	1	0.956865	25.2282	26.1064	Other
NCU00042	-0.191861	1	0.617656	28.1828	31.6927	Other
NCU00043	0.0377267	1	0.979445	27.9863	26.8209	Other
NCU00045	-0.0712565	1	0.836524	27.356	28.2796	Other
NCU00046	-0.0602236	1	0.896011	26.6237	27.3073	Other
NCU00047	-0.278623	1	0.625992	14.1489	17.0162	Other
NCU00048	-0.213588	1	0.784409	14.9589	17.0758	Other
NCU00050	0.100172	1	0.811467	33.7888	30.951	Other
NCU00051	-0.258128	1	0.497205	24.9346	29.3667	Other
NCU00052	0.260026	1	0.501739	34.6146	28.4499	Other
NCU00054	0.108409	1	0.860259	30.1086	27.3829	Other
NCU00055	0.153845	1	0.691408	31.5155	27.8213	Other
NCU00056	0.00118476	1	1	32.2065	31.6168	Other
NCU00057	0.146184	1	0.681189	29.5058	26.1895	Other
NCU00059	-0.031659	1	1	28.8508	29.018	Other
NCU00060	-0.00124236	1	1	28.8583	28.4152	Other
NCU00061	-0.00432886	1	1	34.9358	34.3699	Other
NCU00064	-0.0962218	1	0.891972	24.5718	25.8534	Other
NCU00065	0.170229	1	0.732629	28.0782	24.6223	Other
NCU00066	-0.0667507	1	0.894049	25.5363	26.2928	Other
NCU00067	-0.117898	1	0.83355	26.1267	27.9463	Other
NCU00068	0.0092298	1	1	25.4498	24.8451	Other
NCU00069	-0.443808	1	0.409899	12.6573	17.0278	Other
NCU00070	-0.0439996	1	1	28.5265	28.9171	Other
NCU00071	0.252317	1	0.484705	39.1326	32.304	Other
NCU00072	0.0137625	1	1	33.0563	32.1566	Other
NCU00073	-0.0107851	1	1	21.2024	21.0227	Other
NCU00074	-0.051468	1	0.961212	31.3634	32.0132	Other
NCU00075	-0.148859	1	0.687201	31.8118	34.5576	Other
NCU00076	0.124858	1	0.764322	36.214	32.6552	Other
NCU00077	-0.0871911	1	0.839345	28.328	29.5633	Other
NCU00078	-0.0764614	1	0.909838	35.7324	36.9757	Other
NCU00079	0.00375586	1	1	37.5944	36.7992	Other
NCU00080	-0.122774	1	0.695811	33.7345	36.1359	Other
NCU00081	0.0432366	1	1	29.6396	28.3137	Other
NCU00082	-0.186292	1	0.712992	15.5014	17.3527	Other
NCU00083	-0.230115	1	0.605243	26.111	30.1592	Other
NCU00084	-0.109198	1	0.796114	32.6513	34.5299	Other
NCU00085	-0.0801673	1	0.801808	34.9173	36.2816	Other
NCU00086	0.242701	1	0.447805	47.5204	39.4298	Other
NCU00087	0.0471047	1	0.91952	29.5654	28.1642	Other
NCU00088	0.0401377	1	1	28.6451	27.3789	Other
NCU00089	-0.128764	1	0.779412	27.5206	29.6076	Other
NCU00090	-0.0999297	1	0.842024	29.134	30.7271	Other
NCU00091	0.084555	1	0.918102	28.7914	26.7126	Other
NCU00092	-0.168309	1	0.677817	29.529	32.6889	Other
NCU00093	-0.249903	1	0.470325	27.6775	32.3128	Other
NCU00095	-0.00775396	1	1	26.7783	26.4875	Other
NCU00096	0.240583	1	0.546958	34.3307	28.5611	Other
NCU00097	0.11646	1	0.814247	34.9704	31.6509	Other
NCU00099	-0.115829	1	0.767178	24.6215	26.2799	Other
NCU00100	-0.0031258	1	1	28.9462	28.4998	Other
NCU00101	-0.307048	1	0.398408	24.144	29.4414	Other
NCU00102	-0.160099	1	0.667536	27.6972	30.4616	Other
NCU00103	0.026063	1	0.978666	25.8544	25.0339	Other
NCU00104	0.00497714	1	1	26.3486	25.8413	Other
NCU00105	-0.168777	1	0.639336	31.9805	35.4984	Other
NCU00106	-0.0347799	1	1	26.4541	26.6485	Other
NCU00107	-0.00829505	1	1	31.5847	31.2509	Other
NCU00108	0.107247	1	0.805511	31.9577	29.1136	Other
NCU00109	0.0203421	1	1	29.0961	28.2122	Other
NCU00110	-0.00265809	1	1	28.7661	28.3665	Other
NCU00111	-0.269979	1	0.477609	28.8596	34.1203	Other
NCU00112	0.00662034	1	1	29.6125	28.9478	Other
NCU00114	-0.0718576	1	0.959211	28.0763	29.1214	Other
NCU00115	-0.0508345	1	0.962945	34.4352	34.9607	Other
NCU00116	-0.14062	1	0.771479	25.6988	27.9143	Other
NCU00117	0.0647819	1	0.91952	29.3606	27.6484	Other
NCU00118	0.137768	1	0.705048	34.71	30.9585	Other
NCU00119	0.129008	1	0.805511	31.9786	28.6962	Other
NCU00120	-0.00655352	1	1	29.1438	28.7878	Other
NCU00121	0.107571	1	0.85528	28.0561	25.6039	Other
NCU00122	-0.0729833	1	0.842024	29.1808	30.2122	Other
NCU00123	-0.422921	1	0.392937	11.6065	15.4051	Other
NCU00124	-0.0148589	1	1	25.6644	25.5002	Other
NCU00125	0.0102337	1	1	33.6096	32.7915	Other
NCU00126	-0.0203577	1	1	27.6347	27.5894	Other
NCU00127	-0.12132	1	0.836524	26.9907	28.8943	Other
NCU00128	0.266122	1	0.444512	33.0392	27.0309	Other
NCU00129	-0.0199275	1	1	34.1358	34.0016	Other
NCU00130	0.00542135	1	1	35.0947	34.3954	Other
NCU00132	-0.152205	1	0.682613	30.7927	33.6575	Other
NCU00133	-0.0602075	1	0.959912	28.9953	29.6784	Other
NCU00134	0.0118992	1	1	28.6098	27.9215	Other
NCU00135	-0.065205	1	0.959211	28.2752	29.1032	Other
NCU00136	0.00720763	1	1	32.1472	31.4186	Other
NCU00137	-0.0416281	1	1	33.5458	33.9675	Other
NCU00138	0.0294041	1	1	31.3458	30.1851	Other
NCU00142	0.134553	1	0.802314	30.6936	27.4686	Other
NCU00143	-0.0933448	1	0.897868	27.6158	28.8705	Other
NCU00144	0.0128916	1	1	30.1298	29.3796	Other
NCU00145	0.0297097	1	1	30.3437	29.2698	Other
NCU00146	-0.123764	1	0.842024	28.9974	31.1171	Other
NCU00147	-0.0552882	1	0.905858	32.6941	33.4279	Other
NCU00148	0.0361036	1	1	30.9482	29.6654	Other
NCU00149	-0.0351034	1	0.965811	40.1128	40.4202	Other
NCU00150	-0.122221	1	0.7899	30.7426	32.9116	Other
NCU00151	-0.0701397	1	0.849324	32.1831	33.2039	Other
NCU00152	-0.0670968	1	1	22.3899	23.1229	Other
NCU00153	-0.0233414	1	1	25.9988	26.0056	Other
NCU00154	-0.186139	1	0.656205	25.4704	28.5023	Other
NCU00155	0.0368808	1	1	26.7271	25.6255	Other
NCU00157	-0.0649278	1	0.957691	26.2653	27.1039	Other
NCU00158	0.0457473	1	0.979445	28.0216	26.6162	Other
NCU00159	-0.0985172	1	0.81979	22.0312	23.2805	Other
NCU00160	-0.210962	1	0.570556	28.7188	32.641	Other
NCU00161	-0.063531	1	0.901301	29.9039	30.7444	Other
NCU00162	-0.059232	1	0.899629	28.7714	29.5447	Other
NCU00163	-0.21878	1	0.4978	31.8139	36.44	Other
NCU00166	-0.123009	1	0.733403	30.1448	32.3128	Other
NCU00167	0.0123461	1	1	29.1453	28.4046	Other
NCU00168	-0.0347881	1	0.961816	32.0401	32.2499	Other
NCU00169	-0.0937716	1	0.83355	26.0235	27.3331	Other
NCU00170	0.00819744	1	1	24.3131	23.8663	Other
NCU00171	-0.191681	1	0.704781	23.9672	26.9977	Other
NCU00172	0.0758528	1	0.860259	30.0438	28.0614	Other
NCU00173	-0.112579	1	0.77555	26.7592	28.4618	Other
NCU00175	-0.156349	1	0.634263	31.1772	34.1575	Other
NCU00176	-0.242817	1	0.519435	28.1815	32.892	Other
NCU00177	0.117909	1	0.916606	27.9115	25.2515	Other
NCU00178	-0.128222	1	0.779412	27.5409	29.6912	Other
NCU00179	-0.684321	1	0.0380496	23.5475	37.3246	Other
NCU00180	-0.104057	1	0.839345	28.2719	29.8433	Other
NCU00181	0.130763	1	0.757463	34.1184	30.6108	Other
NCU00182	-0.0333243	1	1	27.6505	27.7944	Other
NCU00183	-0.179335	1	0.611598	27.1031	30.2456	Other
NCU00184	0.026902	1	1	27.3634	26.4287	Other
NCU00185	0.0506886	1	0.981622	35.2109	33.3077	Other
NCU00186	-0.444076	1	0.261837	21.7614	29.0854	Other
NCU00187	0.135907	1	0.749969	32.235	28.8557	Other
NCU00188	0.00599289	1	1	27.4249	26.8656	Other
NCU00189	0.287686	1	0.64572	15.9725	12.9678	Other
NCU00192	0.475141	1	0.215961	33.1472	23.6275	Other
NCU00193	-0.146085	1	0.73741	31.3204	34.0746	Other
NCU00194	0.0132858	1	1	28.2323	27.495	Other
NCU00195	-0.179957	1	0.672798	28.6292	31.9448	Other
NCU00196	0.0445882	1	0.979445	28.131	26.8447	Other
NCU00197	-0.245178	1	0.70433	14.4347	16.9079	Other
NCU00198	-0.270779	1	0.489087	24.1706	28.8389	Other
NCU00199	0.0302975	1	1	29.6437	28.5592	Other
NCU00200	0.0802599	1	0.920868	30.5956	28.4433	Other
NCU00201	-0.0377501	1	0.959912	29.2604	29.5044	Other
NCU00202	0.0596206	1	1	27.7963	26.2182	Other
NCU00203	0.0156852	1	1	35.4506	34.4462	Other
NCU00204	-0.0153758	1	1	33.9193	33.7236	Other
NCU00205	-0.035604	1	0.957691	26.2699	26.4928	Other
NCU00206	0.145325	1	0.753802	33.3983	29.673	Other
NCU00207	0.112772	1	0.814247	34.6643	31.5719	Other
NCU00208	0.0290709	1	1	32.3443	31.1814	Other
NCU00209	-0.0275434	1	1	29.9041	29.9337	Other
NCU00210	-0.281514	1	0.407105	25.3784	30.3616	Other
NCU00211	-0.384099	1	0.228179	28.3874	36.4275	Other
NCU00212	-0.0370933	1	0.955988	24.3846	24.6081	Other
NCU00213	-0.110758	1	0.836524	27.1112	28.7906	Other
NCU00214	-0.0556419	1	0.901301	29.5571	30.2047	Other
NCU00215	-0.0710734	1	0.891972	24.6479	25.4679	Other
NCU00216	-0.0548643	1	0.958472	27.1517	27.7757	Other
NCU00218	-0.12704	1	0.83355	26.0542	28.0031	Other
NCU00219	-0.0558976	1	0.955055	22.9125	23.436	Other
NCU00220	-0.123887	1	0.779412	27.71	29.8092	Other
NCU00221	-0.0493596	1	0.962945	34.1485	34.7088	Other
NCU00222	-0.0262993	1	1	26.4643	26.5552	Other
NCU00223	-0.00692034	1	1	26.9804	26.6491	Other
NCU00224	0.302222	1	0.456338	28.5844	22.8319	Other
NCU00225	0.0558104	1	0.979067	27.4132	25.9098	Other
NCU00226	0.0457372	1	0.980469	31.4207	29.9321	Other
NCU00227	0.0010414	1	1	29.5725	29.0713	Other
NCU00229	-0.209005	1	0.790757	15.9452	18.098	Other
NCU00230	-0.0917751	1	0.897868	27.762	29.1132	Other
NCU00231	-0.141426	1	0.695811	33.5994	36.3993	Other
NCU00232	0.167268	1	0.741734	30.4254	26.6084	Other
NCU00233	-0.148136	1	0.720183	27.3763	29.7541	Other
NCU00234	-0.0552199	1	0.889768	23.8138	24.3969	Other
NCU00236	-0.288003	1	0.423446	26.985	32.4593	Other
NCU00237	0.0853665	1	0.916606	27.6713	25.6407	Other
NCU00238	0.00643523	1	1	37.9794	37.17	Other
NCU00239	-0.0621316	1	0.957691	26.3578	27.0825	Other
NCU00240	-0.0539729	1	0.902893	30.583	31.2537	Other
NCU00241	-0.0823642	1	0.955988	24.2319	25.2226	Other
NCU00242	-0.0778377	1	0.955055	23.2324	24.1497	Other
NCU00243	-0.154797	1	0.747174	20.4713	22.4777	Other
NCU00244	-0.211767	1	0.591542	24.0665	27.3809	Other
NCU00245	-0.508613	1	0.161762	22.8704	31.9848	Other
NCU00246	-0.0485747	1	0.905858	32.6256	33.1737	Other
NCU00247	-0.363764	1	0.409254	20.4743	25.9846	Other
NCU00248	-0.116636	1	0.879373	19.3523	20.708	Other
NCU00249	-0.0555033	1	0.901301	29.8566	30.4988	Other
NCU00250	-0.240583	1	0.470325	27.9768	32.4704	Other
NCU00251	-0.0276538	1	1	27.4068	27.4868	Other
NCU00252	0.0424062	1	0.926717	35.4925	33.9099	Other
NCU00253	-0.0542356	1	1	30.4101	31.0865	Other
NCU00254	0.360874	1	0.393394	27.4835	20.9501	Other
NCU00257	-0.171397	1	0.71532	26.2222	29.0853	Other
NCU00258	-0.0750518	1	0.957691	26.2474	27.1457	Other
NCU00259	-0.412442	1	0.193258	30.3255	39.7513	Other
NCU00260	-0.267339	1	0.497205	25.3633	30.0363	Other
NCU00261	0.0027077	1	1	26.4089	25.9592	Other
NCU00262	-0.22161	1	0.49133	30.8212	35.3831	Other
NCU00263	0.031564	1	1	33.5077	32.2708	Other
NCU00264	-0.156319	1	0.695811	33.6808	36.8987	Other
NCU00265	0.124939	1	0.814247	34.7327	31.3344	Other
NCU00267	0.180097	1	0.557421	44.571	38.7291	Other
NCU00268	0.209907	1	0.520585	37.7477	32.047	Other
NCU00269	0.0185545	1	1	27.3022	26.5014	Other
NCU00270	-0.19812	1	0.591542	24.2661	27.4126	Other
NCU00271	-0.261604	1	0.574742	15.3797	18.3525	Other
NCU00272	0.132302	1	0.791683	27.5238	24.6876	Other
NCU00273	-0.039958	1	1	26.6536	26.9764	Other
NCU00274	0.0980821	1	0.862562	31.1478	28.6029	Other
NCU00275	-0.0438675	1	0.958472	27.3333	27.7193	Other
NCU00276	-0.105044	1	0.786572	29.6304	31.3448	Other
NCU00277	0.0322862	1	1	23.6082	22.6944	Other
NCU00278	-0.125005	1	0.806891	19.0196	20.4632	Other
NCU00279	-0.0671404	1	0.849324	32.3256	33.3006	Other
NCU00280	0.0751325	1	0.978242	25.0344	23.355	Other
NCU00281	0.0024887	1	1	29.2452	28.7004	Other
NCU00282	-0.0113879	1	1	33.1986	32.9417	Other
NCU00283	0.0521504	1	0.913349	25.5037	24.1986	Other
NCU00284	-0.0921875	1	0.793077	31.854	33.2587	Other
NCU00285	-0.270901	1	0.452508	31.0731	36.945	Other
NCU00287	0.0786511	1	0.925651	34.5892	32.2238	Other
NCU00288	-0.362393	1	0.406224	16.1573	20.4952	Other
NCU00289	0.173921	1	0.745952	31.1772	27.196	Other
NCU00290	0.0509025	1	0.92966	38.993	36.9965	Other
NCU00291	-0.295216	1	0.46218	21.1609	25.5337	Other
NCU00292	-0.0609525	1	0.902893	30.5417	31.2794	Other
NCU00293	-0.0275163	1	0.963473	35.3008	35.4209	Other
NCU00294	0.0521078	1	0.980469	30.9743	29.3362	Other
NCU00295	-0.0480293	1	0.901301	29.7081	30.2674	Other
NCU00296	-0.262745	1	0.489087	24.3023	28.7336	Other
NCU00297	0.0663322	1	0.883529	42.8896	40.445	Other
NCU00298	-0.0190991	1	1	37.814	37.6777	Other
NCU00299	-0.214369	1	0.576753	29.4871	33.6036	Other
NCU00300	0.124097	1	0.798953	29.8377	26.8487	Other
NCU00301	-0.0443339	1	1	27.7733	28.152	Other
NCU00302	0.0253546	1	1	27.6408	26.6418	Other
NCU00303	-0.119296	1	0.733403	30.0989	32.2235	Other
NCU00304	-0.0818386	1	0.859522	37.419	38.9609	Other
NCU00305	0.080721	1	0.862562	31.0104	28.9291	Other
NCU00306	0.121208	1	0.764322	36.272	32.6934	Other
NCU00307	-0.427301	1	0.37852	14.1383	18.8621	Other
NCU00308	-0.0276861	1	1	27.6924	27.8114	Other
NCU00309	0.0708283	1	0.92215	31.5203	29.4817	Other
NCU00310	0.0961947	1	0.862562	31.1833	28.655	Other
NCU00311	-0.00141077	1	1	25.3297	24.9523	Other
NCU00312	0.150828	1	0.676352	39.8969	35.4628	Other
NCU00313	0.108585	1	0.781861	42.1479	38.4338	Other
NCU00314	0.137858	1	0.730941	41.7297	37.2159	Other
NCU00315	-0.0705147	1	0.958472	27.1761	28.0471	Other
NCU00316	-0.135862	1	0.78308	28.3469	30.7161	Other
NCU00317	-0.0300907	1	1	30.9479	31.0791	Other
NCU00318	0.251231	1	0.501739	34.8694	28.7364	Other
NCU00319	0.100049	1	0.868846	34.1387	31.4308	Other
NCU00320	0.0550456	1	0.916606	27.6509	26.1864	Other
NCU00321	-0.143468	1	0.762624	23.7247	25.7813	Other
NCU00322	0.156614	1	0.630053	40.5693	35.7775	Other
NCU00324	0.15606	1	0.791683	27.7895	24.4546	Other
NCU00325	-0.0319879	1	1	35.8155	35.9814	Other
NCU00326	-0.0876138	1	0.955055	23.0094	24.077	Other
NCU00327	-0.264766	1	0.574742	15.6487	18.5706	Other
NCU00329	-0.154667	1	0.733403	29.9807	32.8781	Other
NCU00330	-0.075432	1	0.889768	23.7253	24.5567	Other
NCU00331	-0.0363519	1	0.959912	29.1424	29.3492	Other
NCU00332	-0.0282235	1	0.961212	31.4642	31.5271	Other
NCU00333	-0.00776931	1	1	27.9124	27.6212	Other
NCU00334	0.213342	1	0.681189	29.8451	25.2843	Other
NCU00335	0.0893677	1	0.916606	27.7426	25.614	Other
NCU00336	0.0963374	1	0.918102	28.6705	26.3817	Other
NCU00337	-0.101293	1	0.896011	26.6016	28.0611	Other
NCU00338	0.27322	1	0.432303	37.982	30.8722	Other
NCU00339	0.258939	1	0.533836	32.2694	26.4898	Other
NCU00340	0.0813738	1	0.857835	28.9923	26.9225	Other
NCU00343	-0.10933	1	0.946288	15.8021	16.8861	Other
NCU00344	0.045505	1	0.916606	27.4835	26.1498	Other
NCU00345	0.0763943	1	0.870756	35.1224	32.7382	Other
NCU00346	-0.129627	1	0.724806	28.2326	30.3944	Other
NCU00347	-0.0808185	1	0.896011	26.5218	27.6193	Other
NCU00348	-0.200403	1	0.582689	30.8082	34.9418	Other
NCU00349	-0.208213	1	0.576753	29.5539	33.5609	Other
NCU00350	-0.080304	1	0.957691	26.132	27.1825	Other
NCU00351	-0.0585077	1	0.909838	35.5661	36.4064	Other
NCU00352	0.0893964	1	0.916606	27.4997	25.4148	Other
NCU00353	-0.029475	1	1	19.7621	19.849	Other
NCU00354	-0.0537252	1	0.950627	19.121	19.5038	Other
NCU00355	0.246528	1	0.58232	31.7296	26.2945	Other
NCU00356	-0.0225375	1	1	32.8407	32.821	Other
NCU00357	0.00874494	1	1	28.2746	27.6794	Other
NCU00358	-0.191625	1	0.699053	22.9081	25.769	Other
NCU00359	-0.126423	1	0.771479	25.6368	27.5053	Other
NCU00360	0.0150599	1	1	32.3024	31.412	Other
NCU00361	0.0714916	1	0.979445	28.2252	26.2864	Other
NCU00362	0.062042	1	0.92215	31.7083	29.8462	Other
NCU00363	0.112044	1	0.760966	35.1652	31.9739	Other
NCU00364	0.140138	1	0.709208	35.6814	31.8572	Other
NCU00365	-0.706352	1	0.12195	13.3416	21.6843	Other
NCU00366	-0.0783924	1	0.960578	29.9559	31.1321	Other
NCU00367	0.174237	1	0.659151	36.2254	31.5306	Other
NCU00368	0.159321	1	0.78774	26.5856	23.4184	Other
NCU00369	-0.0891585	1	0.957691	25.9465	27.1294	Other
NCU00370	0.126926	1	0.741734	30.1278	27.1135	Other
NCU00371	0.0110186	1	1	28.4834	27.8248	Other
NCU00372	0.127709	1	0.805511	31.4711	28.3125	Other
NCU00373	-0.0107573	1	1	26.5998	26.389	Other
NCU00375	-0.177058	1	0.672798	28.6731	31.9887	Other
NCU00376	0.108213	1	0.760966	35.2084	32.1154	Other
NCU00377	0.0963149	1	0.808558	32.4899	29.8797	Other
NCU00378	0.00364053	1	1	29.1926	28.6198	Other
NCU00379	0.0287888	1	1	30.662	29.5519	Other
NCU00380	0.175137	1	0.668085	38.1016	33.1388	Other
NCU00382	-0.103788	1	0.894049	25.4757	26.8898	Other
NCU00384	-0.292831	1	0.517896	16.1043	19.5959	Other
NCU00385	0.140803	1	0.749969	32.3741	28.8772	Other
NCU00386	-0.0146451	1	1	37.0063	36.7451	Other
NCU00387	-0.141643	1	0.741242	32.1601	34.8565	Other
NCU00388	-0.0870969	1	0.889768	23.6009	24.6753	Other
NCU00389	0.0480577	1	0.980469	30.9949	29.4811	Other
NCU00391	-0.140947	1	0.869308	16.378	17.8637	Other
NCU00392	0.00573043	1	1	32.0747	31.4322	Other
NCU00395	0.0168837	1	1	33.6197	32.6621	Other
NCU00396	-0.0534909	1	0.957691	26.2863	26.8273	Other
NCU00397	-0.187466	1	0.62344	29.1084	32.6481	Other
NCU00398	-0.113968	1	0.844574	29.9112	31.8782	Other
NCU00399	-0.0970546	1	0.844574	30.1732	31.7855	Other
NCU00400	0.111179	1	0.781861	42.2329	38.4506	Other
NCU00401	-0.0130635	1	1	31.2327	30.9414	Other
NCU00403	0.191675	1	0.644288	33.2836	28.6867	Other
NCU00404	-0.136662	1	0.691596	32.9382	35.5882	Other
NCU00405	-0.010516	1	1	29.7323	29.4872	Other
NCU00406	-0.212146	1	0.650087	24.6849	28.1505	Other
NCU00407	-0.228391	1	0.550205	25.4795	29.4947	Other
NCU00408	0.0279744	1	1	35.468	34.203	Other
NCU00409	-0.192627	1	0.667536	27.6553	31.0791	Other
NCU00410	-0.181316	1	0.650087	24.5683	27.4459	Other
NCU00411	-0.0251537	1	1	29.5704	29.6201	Other
NCU00412	-0.0164089	1	1	35.8634	35.6554	Other
NCU00413	-0.146774	1	0.71532	26.1944	28.5223	Other
NCU00414	0.0462871	1	0.981622	35.2107	33.5556	Other
NCU00415	0.000809407	1	1	28.2683	27.7979	Other
NCU00416	-0.156871	1	0.710194	25.2928	27.7037	Other
NCU00417	-0.0956019	1	0.796114	32.4518	34.2251	Other
NCU00418	-0.247212	1	0.477609	28.6179	33.4364	Other
NCU00419	-0.308578	1	0.368247	30.2611	36.8869	Other
NCU00420	-0.0990419	1	0.823547	23.3348	24.6272	Other
NCU00421	0.117538	1	0.862562	31.3848	28.4421	Other
NCU00422	-0.336317	1	0.362054	24.7535	30.7477	Other
NCU00423	0.0631411	1	0.916606	27.8218	26.187	Other
NCU00424	-0.0219631	1	1	25.9082	25.8194	Other
NCU00425	0.253101	1	0.65042	24.8034	20.4541	Other
NCU00426	-0.0238555	1	1	28.163	28.0978	Other
NCU00427	-0.0360012	1	0.958472	27.2031	27.3846	Other
NCU00428	-0.100102	1	0.842024	29.0505	30.5731	Other
NCU00430	-0.0021709	1	1	31.4957	31.0251	Other
NCU00431	-0.0299227	1	0.960578	30.3338	30.5322	Other
NCU00432	0.0495324	1	0.920868	30.6364	29.1017	Other
NCU00434	-0.0622666	1	0.958472	27.2675	27.9889	Other
NCU00435	-0.321531	1	0.353224	28.1221	34.6826	Other
NCU00436	-0.00232873	1	1	26.2865	25.911	Other
NCU00437	0.0151394	1	0.982593	39.0271	37.9546	Other
NCU00438	-0.199721	1	0.582689	30.8039	34.7608	Other
NCU00439	-0.318065	1	0.563015	14.4144	17.718	Other
NCU00440	-0.142577	1	0.710194	25.3077	27.4564	Other
NCU00441	0.0739159	1	0.918102	28.9312	27.0038	Other
NCU00442	-0.119756	1	0.827079	23.9425	25.5911	Other
NCU00443	-0.151385	1	0.699053	23.3609	25.5313	Other
NCU00444	-0.219336	1	0.52622	29.3523	33.6192	Other
NCU00445	0.0359504	1	1	27.8083	26.6327	Other
NCU00446	-0.0272885	1	1	29.507	29.5642	Other
NCU00447	-0.0601037	1	0.957691	26.2744	26.9725	Other
NCU00448	-0.151715	1	0.662013	26.8927	29.3885	Other
NCU00449	-0.000285358	1	1	40.922	40.1927	Other
NCU00450	-0.0289981	1	0.961816	32.196	32.3587	Other
NCU00451	-0.0448181	1	0.964464	37.2191	37.8309	Other
NCU00453	-0.136908	1	0.779412	27.8115	30.0655	Other
NCU00454	-0.12241	1	0.839345	27.8641	29.9274	Other
NCU00455	-0.113183	1	0.830407	25.2675	26.8626	Other
NCU00456	-0.288668	1	0.47161	21.9006	26.4392	Other
NCU00457	-0.198766	1	0.692978	22.267	25.1509	Other
NCU00458	-0.362211	1	0.269878	26.2769	33.3165	Other
NCU00459	0.0128253	1	1	27.0874	26.3968	Other
NCU00461	0.0131555	1	1	31.3826	30.5974	Other
NCU00462	-0.224083	1	0.70433	14.5755	16.7796	Other
NCU00463	-0.0239387	1	1	34.8311	34.7906	Other
NCU00464	-0.038886	1	0.955988	24.1671	24.4997	Other
NCU00465	-0.08437	1	0.899629	28.4927	29.764	Other
NCU00466	-0.163133	1	0.672798	28.633	31.5952	Other
NCU00467	-0.00538416	1	1	29.7032	29.3476	Other
NCU00468	0.00303413	1	1	40.1228	39.3743	Other
NCU00469	-0.00798642	1	1	34.2722	33.8809	Other
NCU00470	-0.0171976	1	1	33.2546	33.0247	Other
NCU00471	0.11921	1	0.784421	43.22	39.0767	Other
NCU00472	-0.117006	1	0.83355	25.9642	27.686	Other
NCU00473	-0.0345266	1	0.960578	30.2708	30.4843	Other
NCU00474	-0.0199245	1	1	38.0673	37.9936	Other
NCU00475	-0.067309	1	0.959211	28.1315	29.0297	Other
NCU00476	-0.0993498	1	0.849324	32.1166	33.9001	Other
NCU00477	-0.0045827	1	1	31.9544	31.5044	Other
NCU00478	-0.0633885	1	0.894049	25.6617	26.3657	Other
NCU00480	-0.0303017	1	0.958472	27.1526	27.3	Other
NCU00481	-0.0673671	1	0.897868	27.7365	28.5884	Other
NCU00483	0.0104914	1	1	34.6341	33.7853	Other
NCU00484	-0.045588	1	1	35.4015	36.0357	Other
NCU00485	-0.179551	1	0.720934	16.8699	18.6744	Other
NCU00486	0.0275745	1	0.979445	28.0884	27.0837	Other
NCU00487	-0.342577	1	0.2857	28.2142	35.1927	Other
NCU00488	-0.0961971	1	0.896011	26.7125	28.1349	Other
NCU00489	-0.0588231	1	0.901301	29.5778	30.3425	Other
NCU00490	-0.187647	1	0.656205	25.6793	28.7665	Other
NCU00491	-0.281914	1	0.636813	14.8721	17.9117	Other
NCU00492	-0.0649433	1	0.958472	27.0895	27.8827	Other
NCU00493	0.0040008	1	1	27.4422	26.9283	Other
NCU00494	-0.0718959	1	0.902893	30.8923	31.9662	Other
NCU00495	0.0928041	1	0.860259	30.109	27.7645	Other
NCU00496	-0.298719	1	0.363848	34.7822	42.0537	Other
NCU00497	-0.0233568	1	1	35.7558	35.7411	Other
NCU00498	-0.0572741	1	0.961212	31.3487	32.0994	Other
NCU00499	-0.079873	1	0.889768	23.4443	24.3827	Other
NCU00500	-0.438529	1	0.312278	15.9373	21.395	Other
NCU00501	0.0206954	1	1	28.7498	27.8877	Other
NCU00502	-0.181468	1	0.636805	22.6907	25.3609	Other
NCU00503	-0.0393527	1	0.960578	30.3043	30.6183	Other
NCU00504	0.0823832	1	0.924537	33.8491	31.4713	Other
NCU00505	0.0167606	1	1	28.0961	27.3657	Other
NCU00506	-0.0145198	1	1	28.4023	28.2919	Other
NCU00509	-0.143013	1	0.691596	32.7119	35.5616	Other
NCU00510	-0.45401	1	0.37852	14.2366	19.1695	Other
NCU00512	0.18822	1	0.600217	34.7437	29.9802	Other
NCU00513	0.013991	1	1	30.136	29.3468	Other
NCU00515	0.0197972	1	1	28.0883	27.2231	Other
NCU00516	-0.175742	1	0.861005	14.4042	16.0246	Other
NCU00517	0.0742407	1	0.920868	30.4608	28.4836	Other
NCU00518	-0.0590486	1	0.899629	28.8583	29.5749	Other
NCU00519	-0.584166	1	0.12881	18.588	27.4572	Other
NCU00520	-0.128097	1	0.823547	23.0636	24.8329	Other
NCU00521	-0.0375659	1	0.959211	27.9716	28.2858	Other
NCU00522	0.124094	1	0.846703	25.1371	22.6463	Other
NCU00523	0.10134	1	0.852583	27.1306	24.8797	Other
NCU00524	0.147592	1	0.764322	36.3453	32.2204	Other
NCU00525	0.247658	1	0.588549	32.9352	27.2141	Other
NCU00526	0.25968	1	0.480504	31.5733	25.8867	Other
NCU00527	0.0155413	1	1	28.7408	27.959	Other
NCU00528	0.0238393	1	0.978242	25.0393	24.2128	Other
NCU00529	0.331013	1	0.467144	24.148	18.9301	Other
NCU00530	0.309636	1	0.456338	28.4963	22.7736	Other
NCU00531	-0.0221323	1	1	22.1942	22.0086	Other
NCU00532	0.463654	1	0.207924	32.1098	22.8582	Other
NCU00533	0.158958	1	0.741734	30.1105	26.463	Other
NCU00534	-0.147283	1	0.724806	28.074	30.6853	Other
NCU00535	-0.0759525	1	0.958472	26.8758	27.9091	Other
NCU00536	0.0312378	1	0.979067	27.206	26.1604	Other
NCU00537	0.0647137	1	0.979445	28.1007	26.4293	Other
NCU00538	0.0829552	1	0.918102	28.4764	26.4529	Other
NCU00541	-0.0242107	1	1	23.0672	23.1318	Other
NCU00542	-0.368541	1	0.389327	22.9708	29.1709	Other
NCU00545	0.00757541	1	1	24.6691	24.1428	Other
NCU00547	-0.0701577	1	0.909838	35.8041	36.8107	Other
NCU00548	-0.0382649	1	0.962945	34.3133	34.666	Other
NCU00549	-0.423812	1	0.280525	23.5479	31.1176	Other
NCU00550	0.0349959	1	0.980777	32.3046	30.9989	Other
NCU00551	-0.0508164	1	0.955988	23.9554	24.4314	Other
NCU00552	0.164375	1	0.62086	38.5374	33.8072	Other
NCU00553	0.0800981	1	0.91952	29.9018	27.8283	Other
NCU00554	0.083793	1	0.860259	30.1103	27.9526	Other
NCU00556	0.115028	1	0.805511	31.6322	28.7378	Other
NCU00557	-0.218223	1	0.856213	13.3239	15.2941	Other
NCU00558	0.0456793	1	0.980777	32.3214	30.8055	Other
NCU00559	0.111317	1	0.811467	33.4946	30.4803	Other
NCU00560	0.0935996	1	0.913349	25.6183	23.5942	Other
NCU00561	-0.536457	1	0.208801	16.5493	23.7487	Other
NCU00562	-0.0617746	1	0.959211	28.3607	29.1285	Other
NCU00563	0.0973213	1	0.868846	34.3057	31.5524	Other
NCU00564	-0.115389	1	0.78308	28.8726	30.7984	Other
NCU00565	0.0772001	1	0.977792	24.066	22.4416	Other
NCU00566	-0.064879	1	0.959211	28.1846	28.9811	Other
NCU00567	0.0436932	1	0.978666	25.9616	24.7803	Other
NCU00568	0.00241575	1	1	30.7125	30.1741	Other
NCU00569	0.0770398	1	0.862562	30.9563	28.9643	Other
NCU00570	-0.0511602	1	0.90441	31.7883	32.3921	Other
NCU00571	-0.0880839	1	0.891972	24.5572	25.6538	Other
NCU00572	0.136797	1	0.676352	40.2521	35.9847	Other
NCU00573	-0.0570653	1	0.955988	23.9264	24.4881	Other
NCU00574	0.0896331	1	0.970881	14.2608	13.1141	Other
NCU00575	-0.0394029	1	0.955055	23.2005	23.5	Other
NCU00576	-0.104556	1	0.891972	24.4065	25.8312	Other
NCU00577	-0.0290404	1	1	29.4182	29.539	Other
NCU00578	-0.16194	1	0.767178	24.4372	26.8737	Other
NCU00579	-0.0310052	1	1	25.7571	25.9011	Other
NCU00580	0.10132	1	0.85528	28.4462	26.0144	Other
NCU00581	0.0142946	1	1	29.5652	28.9028	Other
NCU00582	-0.0149577	1	1	31.4295	31.2619	Other
NCU00583	-0.126807	1	0.796576	16.9137	18.3901	Other
NCU00584	0.0183157	1	1	26.7882	25.957	Other
NCU00585	-0.0803251	1	0.889768	23.6631	24.651	Other
NCU00586	0.0480998	1	0.91952	29.4591	28.0937	Other
NCU00587	0.0536267	1	0.916606	27.4635	26.0642	Other
NCU00589	0.106478	1	0.913349	25.7829	23.571	Other
NCU00590	-0.0930178	1	0.891972	24.578	25.8305	Other
NCU00591	0.0853764	1	0.860259	30.1589	27.946	Other
NCU00592	0.180582	1	0.691408	31.5131	27.3078	Other
NCU00593	0.0794608	1	0.91952	29.8808	27.8137	Other
NCU00594	-0.0939768	1	1	15.4937	16.3053	Other
NCU00595	-0.00959861	1	1	24.8258	24.6156	Other
NCU00596	-0.0919729	1	0.889768	23.5843	24.784	Other
NCU00597	-0.0866058	1	0.842024	29.2431	30.5094	Other
NCU00598	0.385074	1	0.274297	36.8739	27.7905	Other
NCU00599	0.241018	1	0.533836	32.2001	26.826	Other
NCU00600	0.0466871	1	0.916606	27.4193	26.1569	Other
NCU00602	0.167428	1	0.675684	28.3833	24.8725	Other
NCU00603	0.24055	1	0.58232	31.798	26.44	Other
NCU00604	0.22036	1	0.496301	41.4962	35.0129	Other
NCU00605	0.141429	1	0.764322	36.4732	32.47	Other
NCU00606	0.329698	1	0.292171	44.1494	34.4709	Other
NCU00607	0.466203	1	0.143187	40.7209	29.1066	Other
NCU00608	0.0495946	1	0.980469	31.1273	29.569	Other
NCU00609	0.0645444	1	0.980777	32.2206	30.2412	Other
NCU00611	0.246983	1	0.487878	32.5502	26.9192	Other
NCU00614	0.114538	1	0.757463	34.2851	31.1039	Other
NCU00616	-0.114285	1	0.796114	32.699	34.8656	Other
NCU00617	-0.160243	1	0.617656	28.3455	31.1891	Other
NCU00618	-0.0873373	1	0.899629	28.4577	29.7853	Other
NCU00619	0.0525249	1	0.981353	34.2543	32.5944	Other
NCU00620	-0.185579	1	0.710194	25.0714	28.1279	Other
NCU00621	0.00818649	1	1	29.542	28.8608	Other
NCU00622	0.00517007	1	1	24.7776	24.2915	Other
NCU00623	-0.0459983	1	0.959211	27.9139	28.4892	Other
NCU00624	0.0383782	1	1	29.4862	28.2625	Other
NCU00627	-0.0225232	1	1	25.6966	25.6824	Other
NCU00628	0.090094	1	0.819456	36.5027	33.7322	Other
NCU00629	0.0214872	1	1	24.8157	24.0802	Other
NCU00630	-0.184148	1	0.570556	28.8119	32.243	Other
NCU00631	0.0696654	1	0.870756	35.1832	32.973	Other
NCU00632	0.0138624	1	1	29.2704	28.5329	Other
NCU00633	0.094488	1	0.924537	33.8579	31.1987	Other
NCU00634	-0.141478	1	0.827079	24.1098	26.195	Other
NCU00635	0.0299191	1	1	29.4232	28.3524	Other
NCU00636	0.0354666	1	0.979445	27.9328	26.8153	Other
NCU00638	-0.140446	1	0.744911	32.9846	35.7453	Other
NCU00640	0.227899	1	0.568966	29.6973	24.8441	Other
NCU00641	-0.250484	1	0.484605	29.7875	34.8216	Other
NCU00642	0.179594	1	0.691408	31.8505	27.6075	Other
NCU00643	-0.169919	1	0.62344	29.2726	32.5165	Other
NCU00644	-0.137252	1	0.77555	26.7342	28.889	Other
NCU00645	-0.678661	1	0.0620454	21.5133	34.0359	Other
NCU00646	-0.155766	1	0.724806	28.1456	30.8756	Other
NCU00648	0.106668	1	0.757463	34.0935	31.0957	Other
NCU00649	-0.0732631	1	0.901301	30.0115	30.9672	Other
NCU00650	0.0792473	1	0.852583	27.0019	25.1484	Other
NCU00651	-0.050487	1	0.957691	26.1731	26.7008	Other
NCU00652	0.348277	1	0.322298	33.8211	26.1093	Other
NCU00653	0.02759	1	1	33.879	32.6818	Other
NCU00654	-0.127693	1	0.779412	27.9822	30.0032	Other
NCU00655	-0.0426279	1	1	21.3842	21.7044	Other
NCU00656	-0.0114039	1	1	28.7997	28.5497	Other
NCU00657	0.143289	1	0.659151	36.0651	32.0317	Other
NCU00658	0.0949045	1	0.805511	31.6483	29.1333	Other
NCU00659	-0.0685089	1	0.958472	27.1272	27.9994	Other
NCU00660	0.124244	1	0.857835	28.9876	26.2167	Other
NCU00662	0.143297	1	0.663707	37.0154	32.9644	Other
NCU00663	0.17837	1	0.594508	33.5654	29.1141	Other
NCU00664	0.0168624	1	1	33.381	32.4257	Other
NCU00665	0.0068528	1	1	34.8827	34.1638	Other
NCU00666	0.129343	1	0.808558	32.6086	29.337	Other
NCU00667	0.0666751	1	0.918102	28.8658	27.0366	Other
NCU00668	0.00744552	1	1	25.3449	24.8097	Other
NCU00669	0.161357	1	0.798953	29.9864	26.2795	Other
NCU00670	-0.0418738	1	0.959912	29.1706	29.5124	Other
NCU00671	0.0906387	1	0.85528	28.2362	26.0892	Other
NCU00673	-0.0947723	1	0.830407	24.9257	26.2528	Other
NCU00674	0.0893427	1	0.824251	38.6741	35.7183	Other
NCU00675	0.148871	1	0.795415	28.9192	25.6287	Other
NCU00676	0.0341393	1	0.979804	28.9722	27.8241	Other
NCU00677	0.145006	1	0.672296	39.489	34.9955	Other
NCU00678	0.124216	1	0.77063	38.3093	34.518	Other
NCU00679	0.0319543	1	1	32.8523	31.5988	Other
NCU00680	0.00298074	1	1	26.3556	25.8695	Other
NCU00681	0.0750419	1	0.913349	25.7289	24.0241	Other
NCU00682	0.0461887	1	1	23.685	22.5565	Other
NCU00684	0.171362	1	0.681189	29.672	25.9588	Other
NCU00685	0.0264875	1	1	26.7344	25.8221	Other
NCU00687	-0.125658	1	0.767178	24.4617	26.2954	Other
NCU00688	-0.152869	1	0.622643	38.8719	42.4823	Other
NCU00689	-0.0526595	1	0.894049	25.7641	26.2811	Other
NCU00690	-0.0211159	1	0.959211	28.3641	28.3217	Other
NCU00691	-0.10139	1	0.839345	27.9162	29.4634	Other
NCU00692	-0.224083	1	0.542754	24.6968	28.4901	Other
NCU00693	-0.156745	1	0.757793	22.6807	24.9511	Other
NCU00694	-0.0851256	1	0.896011	26.382	27.5942	Other
NCU00695	-0.102787	1	0.896011	26.5423	28.0397	Other
NCU00696	-0.0904388	1	0.894049	25.4318	26.6444	Other
NCU00697	0.196949	1	0.59021	42.4882	36.4396	Other
NCU00698	0.227831	1	0.540537	33.217	27.8369	Other
NCU00699	0.232611	1	0.533836	31.9887	26.7235	Other
NCU00700	0.162075	1	0.749969	32.445	28.4722	Other
NCU00701	-0.000117404	1	1	30.8804	30.3541	Other
NCU00704	0.451909	1	0.152829	46.6329	33.4157	Other
NCU00705	0.527461	1	0.0776352	46.3976	31.7681	Other
NCU00706	-0.0676936	1	0.959912	28.8696	29.8619	Other
NCU00707	0.107396	1	0.811467	33.6344	30.7113	Other
NCU00708	0.239155	1	0.526411	38.8639	32.2263	Other
NCU00709	0.188905	1	0.580561	40.2909	34.7123	Other
NCU00710	0.0860551	1	0.868846	34.2557	31.8163	Other
NCU00711	-0.112907	1	0.786572	29.5687	31.4479	Other
NCU00712	-0.130971	1	0.882245	20.6027	22.2002	Other
NCU00713	-0.14963	1	0.735023	18.7765	20.4549	Other
NCU00714	0.0691909	1	0.977792	24.3171	22.8207	Other
NCU00715	0.0943574	1	0.91952	29.6105	27.3042	Other
NCU00716	0.306113	1	0.373288	35.0614	27.8287	Other
NCU00717	0.106087	1	0.852583	27.303	24.9686	Other
NCU00718	-0.645937	1	0.0526434	23.8076	36.6932	Other
NCU00719	0.202676	1	0.559036	36.1218	30.8328	Other
NCU00720	0.0734234	1	0.913349	25.519	23.8834	Other
NCU00721	-0.149092	1	0.724806	27.8163	30.4594	Other
NCU00722	-0.0618579	1	0.894049	25.6172	26.2988	Other
NCU00723	0.128142	1	0.805511	31.9197	28.699	Other
NCU00724	0.208029	1	0.542698	41.5279	35.3285	Other
NCU00725	-0.0836315	1	0.956865	25.0189	26.0315	Other
NCU00726	-0.0536346	1	0.956865	25.3505	25.8914	Other
NCU00727	-0.0623726	1	0.899629	28.6619	29.4955	Other
NCU00728	0.105163	1	0.870756	35.3046	32.2658	Other
NCU00729	-0.239405	1	0.636805	22.2661	26.0208	Other
NCU00730	0.0108905	1	1	32.1572	31.393	Other
NCU00732	0.254987	1	0.47228	37.4101	30.7793	Other
NCU00733	0.17105	1	0.63861	42.9506	37.4743	Other
NCU00734	0.167509	1	0.700704	33.5729	29.3868	Other
NCU00735	-0.292747	1	0.454805	25.486	30.6437	Other
NCU00736	-0.0319401	1	1	23.9533	24.0568	Other
NCU00737	0.00827457	1	1	29.2982	28.66	Other
NCU00738	0.0502144	1	0.980145	30.2964	28.7218	Other
NCU00739	0.619011	1	0.0600388	39.4063	25.0603	Other
NCU00740	0.00059086	1	1	31.2584	30.744	Other
NCU00741	-0.129822	1	0.699857	34.6701	37.3413	Other
NCU00742	-0.0491982	1	0.911056	36.9857	37.6	Other
NCU00743	0.0296512	1	1	23.4079	22.5615	Other
NCU00744	0.0786586	1	0.920868	30.4622	28.3646	Other
NCU00745	0.0670807	1	0.930565	39.5453	37.1521	Other
NCU00746	0.205893	1	0.600217	34.9505	29.7778	Other
NCU00747	0.306652	1	0.314924	42.7098	33.9525	Other
NCU00748	0.206024	1	0.633228	31.0448	26.4807	Other
NCU00749	0.421831	1	0.243234	32.7134	24.0148	Other
NCU00751	-0.253568	1	0.512353	27.0425	31.798	Other
NCU00752	0.288542	1	0.30965	47.0761	37.8695	Other
NCU00753	-0.036802	1	1	29.5169	29.8032	Other
NCU00754	0.370769	1	0.319302	38.4695	29.1793	Other
NCU00755	0.110063	1	0.811467	33.67	30.6455	Other
NCU00756	-0.106586	1	0.882245	20.3997	21.6631	Other
NCU00757	0.582287	1	0.093884	34.9691	22.9539	Other
NCU00758	0.186522	1	0.654405	35.1141	30.3324	Other
NCU00759	0.0809012	1	0.90766	22.6708	21.0891	Other
NCU00760	-0.163998	1	0.869308	16.342	18.2122	Other
NCU00761	0.138802	1	0.7373	29	25.8829	Other
NCU00762	0.0316343	1	0.980145	30.0684	28.9142	Other
NCU00763	0.350408	1	0.297266	35.1733	27.0719	Other
NCU00764	0.0689333	1	0.979445	27.7349	26.2425	Other
NCU00765	0.252761	1	0.501739	34.7078	28.6318	Other
NCU00766	-0.0460786	1	0.959912	29.1139	29.6411	Other
NCU00768	0.137244	1	0.811467	33.7795	30.1604	Other
NCU00770	0.159633	1	0.795415	28.827	25.3441	Other
NCU00771	-0.0728426	1	0.894049	25.5016	26.3543	Other
NCU00772	-0.0358868	1	0.957691	26.2103	26.4302	Other
NCU00773	-0.109407	1	0.748428	34.0761	36.1307	Other
NCU00774	-0.090905	1	0.793077	31.8145	33.2865	Other
NCU00775	0.0790646	1	0.85528	27.9348	26.0491	Other
NCU00776	0.0488605	1	1	28.9302	27.473	Other
NCU00777	-0.00792694	1	1	27.8423	27.5319	Other
NCU00778	-0.0419101	1	1	27.6802	28.0735	Other
NCU00779	0.117063	1	0.852583	27.1839	24.646	Other
NCU00780	0.0629997	1	0.980145	30.3182	28.5681	Other
NCU00781	0.418197	1	0.173112	41.8583	31.093	Other
NCU00782	0.350644	1	0.297266	35.2796	27.1233	Other
NCU00783	0.372774	1	0.438249	26.7414	20.3172	Other
NCU00784	0.149294	1	0.798953	29.8936	26.4513	Other
NCU00786	0.00834217	1	1	36.1985	35.3448	Other
NCU00787	-0.44677	1	0.205401	25.0326	33.6916	Other
NCU00788	0.170441	1	0.616	37.5107	32.7708	Other
NCU00789	0.0130739	1	1	27.1433	26.4843	Other
NCU00790	0.157657	1	0.691408	31.9413	28.1354	Other
NCU00792	-0.0149368	1	1	26.2636	26.1021	Other
NCU00793	0.0319689	1	0.979804	29.1527	28.0446	Other
NCU00794	0.02849	1	1	30.9144	29.8074	Other
NCU00795	0.199489	1	0.610948	36.5565	31.2741	Other
NCU00796	-0.00678624	1	1	24.9773	24.6747	Other
NCU00797	0.107903	1	0.757463	34.1164	31.1202	Other
NCU00798	0.249916	1	0.451857	33.9523	28.0818	Other
NCU00799	0.156203	1	0.753802	33.3962	29.4513	Other
NCU00800	0.0533783	1	0.924537	33.6766	31.8304	Other
NCU00801	0.0530743	1	0.979067	27.2431	25.8508	Other
NCU00802	0.23418	1	0.501739	34.525	28.8911	Other
NCU00803	0.142882	1	0.745952	31.0125	27.6251	Other
NCU00804	-0.492907	1	0.235413	16.0611	22.4177	Other
NCU00805	-0.0490442	1	0.954061	22.2809	22.6683	Other
NCU00806	0.137376	1	0.805511	31.9299	28.5067	Other
NCU00807	0.598717	1	0.0424269	50.1262	32.4858	Other
NCU00808	0.0117383	1	1	30.4207	29.6377	Other
NCU00809	0.0490295	1	0.980469	31.1736	29.6064	Other
NCU00810	0.123207	1	0.857835	29.0812	26.2612	Other
NCU00811	0.100414	1	0.866848	33.3195	30.6082	Other
NCU00812	-0.0880568	1	0.894049	25.8375	27.049	Other
NCU00813	-0.124368	1	0.771479	25.6892	27.6311	Other
NCU00814	0.022732	1	1	27.5288	26.6646	Other
NCU00817	0.300592	1	0.447512	27.5641	21.9588	Other
NCU00818	0.0750153	1	0.828682	40.4448	37.8148	Other
NCU00819	-0.178195	1	0.752654	21.3713	23.8653	Other
NCU00821	0.146524	1	0.805511	31.8725	28.2902	Other
NCU00822	0.245912	1	0.508263	35.6793	29.6339	Other
NCU00823	-0.0142904	1	1	26.5586	26.3944	Other
NCU00824	0.18208	1	0.675684	28.634	24.7957	Other
NCU00825	0.00351728	1	1	36.983	36.2556	Other
NCU00826	0.118786	1	0.811467	33.8904	30.6822	Other
NCU00827	0.0956045	1	0.85528	28.0006	25.745	Other
NCU00828	0.0866235	1	0.920868	30.5413	28.2864	Other
NCU00829	0.373261	1	0.341107	31.0438	23.5448	Other
NCU00830	0.026121	1	0.979804	29.2267	28.1877	Other
NCU00831	0.0254102	1	1	27.22	26.3255	Other
NCU00832	-0.11209	1	0.844574	30.25	32.1471	Other
NCU00833	0.0787578	1	0.857835	29.1038	27.114	Other
NCU00834	-0.112453	1	0.729207	29.4195	31.2005	Other
NCU00835	0.0147059	1	1	27.7751	27.0747	Other
NCU00836	-0.0762659	1	0.842024	29.1608	30.2015	Other
NCU00837	0.0183661	1	1	34.5252	33.5812	Other
NCU00838	0.166758	1	0.741734	30.2578	26.5214	Other
NCU00839	0.367108	1	0.281533	38.051	28.9038	Other
NCU00840	0.209493	1	0.649456	34.3822	29.1731	Other
NCU00841	0.304037	1	0.380646	36.1682	28.7292	Other
NCU00842	0.281067	1	0.420051	42.4174	34.34	Other
NCU00843	0.0613832	1	0.981072	33.2901	31.3977	Other
NCU00844	0.154556	1	0.753802	33.2289	29.309	Other
NCU00845	0.0939467	1	0.872585	36.51	33.5967	Other
NCU00846	-0.0436557	1	0.901301	29.8208	30.2334	Other
NCU00847	0.0115414	1	1	29.4296	28.6613	Other
NCU00848	-0.0940653	1	0.751804	35.4035	37.1796	Other
NCU00849	-0.152009	1	0.710194	25.0233	27.3835	Other
NCU00850	0.0859996	1	0.872585	36.5419	33.7793	Other
NCU00851	-0.232616	1	0.61371	19.7169	22.6367	Other
NCU00852	0.25637	1	0.432303	37.6294	31.0236	Other
NCU00853	0.110295	1	0.85528	28.0113	25.5012	Other
NCU00854	0.0505338	1	1	25.7586	24.4628	Other
NCU00855	-0.0780402	1	0.908568	34.4427	35.824	Other
NCU00856	0.134475	1	0.811467	33.7917	30.3041	Other
NCU00857	0.0055602	1	1	31.7269	31.0547	Other
NCU00859	0.0323219	1	1	38.8496	37.2925	Other
NCU00860	-0.0562743	1	0.905858	32.9276	33.6735	Other
NCU00861	0.204522	1	0.542698	41.5996	35.4883	Other
NCU00862	-0.0365133	1	0.959912	29.2622	29.5117	Other
NCU00863	0.0653952	1	0.979445	28.065	26.3706	Other
NCU00864	0.0433256	1	0.979067	27.2458	25.9662	Other
NCU00865	0.0830957	1	0.91952	29.7677	27.5964	Other
NCU00866	0.255217	1	0.568966	29.6739	24.4248	Other
NCU00867	0.132227	1	0.795415	28.7725	25.7928	Other
NCU00868	0.150212	1	0.753802	33.2427	29.3947	Other
NCU00869	0.19411	1	0.605691	35.7068	30.6742	Other
NCU00870	0.104969	1	0.864756	32.3335	29.5846	Other
NCU00871	0.281335	1	0.372528	40.636	32.8026	Other
NCU00872	0.374603	1	0.246809	41.7031	31.6058	Other
NCU00873	0.0957663	1	0.868846	34.4294	31.5913	Other
NCU00874	0.17393	1	0.644288	33.2814	28.993	Other
NCU00875	0.177911	1	0.580561	40.1628	34.9439	Other
NCU00876	-0.0918557	1	0.853663	34.0033	35.669	Other
NCU00877	-0.225599	1	0.570556	28.5074	32.7634	Other
NCU00878	-0.0785077	1	0.816396	40.7314	42.3361	Other
NCU00879	0.0889705	1	0.852583	26.8508	24.8796	Other
NCU00880	0.000700236	1	1	25.6003	25.1779	Other
NCU00881	-0.128582	1	0.762624	23.5072	25.3394	Other
NCU00882	-0.271871	1	0.497205	25.2749	30.1131	Other
NCU00883	-0.146733	1	0.639336	32.5512	35.2831	Other
NCU00884	-0.0395695	1	0.956865	25.3616	25.6476	Other
NCU00885	0.295255	1	0.411299	34.6403	27.7191	Other
NCU00886	-0.0654826	1	0.905858	32.5322	33.4529	Other
NCU00887	-0.0113255	1	1	35.8926	35.5527	Other
NCU00889	-0.00505192	1	1	28.7679	28.4262	Other
NCU00890	0.0857219	1	0.925651	34.8519	32.221	Other
NCU00891	0.148009	1	0.757463	34.0058	30.1928	Other
NCU00892	-0.0342267	1	1	29.5113	29.7255	Other
NCU00893	-0.0313752	1	1	30.6825	30.8421	Other
NCU00894	-0.10642	1	0.81979	22.229	23.5526	Other
NCU00895	-0.0234228	1	0.956865	25.2074	25.2601	Other
NCU00896	-0.0113306	1	1	25.5655	25.3696	Other
NCU00897	-0.0626618	1	0.896011	26.7492	27.4928	Other
NCU00898	-0.0816553	1	0.899629	28.663	29.8676	Other
NCU00899	-0.0564131	1	0.896011	26.746	27.4117	Other
NCU00900	-0.0615612	1	0.956865	25.283	26.0259	Other
NCU00901	0.199495	1	0.638884	32.1129	27.4744	Other
NCU00902	-0.120944	1	0.779412	27.6044	29.5449	Other
NCU00903	-0.198358	1	0.611598	27.114	30.619	Other
NCU00904	0.147334	1	0.686423	30.4873	27.0965	Other
NCU00905	-0.136456	1	0.762624	23.6628	25.6019	Other
NCU00906	-0.277717	1	0.386985	27.8576	33.2654	Other
NCU00907	-0.442267	1	0.462324	12.144	16.0419	Other
NCU00911	-0.14492	1	0.767178	24.562	26.7127	Other
NCU00912	-0.227625	1	0.564081	27.8119	32.1007	Other
NCU00913	-0.00208978	1	1	28.6208	28.1722	Other
NCU00914	-0.0697025	1	0.955988	24.316	25.1232	Other
NCU00915	0.323189	1	0.38784	31.5502	24.784	Other
NCU00916	-0.0288769	1	0.961816	31.9923	32.1662	Other
NCU00917	0.070611	1	0.924537	33.5258	31.4153	Other
NCU00918	-0.0722172	1	0.957691	25.9833	26.9082	Other
NCU00919	-0.0253726	1	1	26.3821	26.433	Other
NCU00920	-0.16071	1	0.720183	26.9145	29.6088	Other
NCU00921	-0.184117	1	0.617656	28.3076	31.7032	Other
NCU00922	-0.00685892	1	1	16.2445	16.1267	Other
NCU00923	-0.193607	1	0.636805	22.779	25.6312	Other
NCU00924	-0.0866559	1	0.90441	31.6319	33.0899	Other
NCU00925	-0.123831	1	0.793077	31.7519	33.926	Other
NCU00926	0.0836681	1	0.92215	31.7478	29.4346	Other
NCU00927	-0.0374383	1	0.959211	28.0516	28.3431	Other
NCU00928	-0.0283236	1	0.962393	33.2105	33.3039	Other
NCU00929	-0.0721201	1	0.902893	30.9337	31.9761	Other
NCU00930	-0.297841	1	0.462731	26.4035	32.1034	Other
NCU00931	0.0601674	1	0.926717	35.7898	33.6943	Other
NCU00932	0.0855715	1	0.926717	35.8928	33.1671	Other
NCU00934	-0.237161	1	0.646747	16.1715	18.8392	Other
NCU00935	-0.000879796	1	1	22.7892	22.4674	Other
NCU00936	0.0632202	1	0.91952	29.7511	28.0096	Other
NCU00937	-0.121442	1	0.799022	33.6611	36.0174	Other
NCU00938	0.022899	1	0.980469	30.9242	29.9531	Other
NCU00939	-0.027671	1	1	26.7629	26.8479	Other
NCU00940	-0.173192	1	0.790757	16.2251	18.1036	Other
NCU00941	0.0282355	1	1	26.6616	25.7439	Other
NCU00943	0.00960274	1	1	37.6498	36.7809	Other
NCU00944	-0.0415085	1	1	27.6207	27.9389	Other
NCU00945	-0.142572	1	0.682613	30.6252	33.2221	Other
NCU00946	-0.0115838	1	1	32.6032	32.4083	Other
NCU00947	-0.0438589	1	0.917455	42.9628	43.5942	Other
NCU00948	-0.188247	1	0.735023	18.4864	20.8441	Other
NCU00949	-0.0336556	1	1	26.4358	26.6213	Other
NCU00950	0.0811338	1	0.913349	25.4582	23.6439	Other
NCU00951	0.0160812	1	1	25.4407	24.7591	Other
NCU00952	-0.205409	1	0.52622	29.2822	33.2968	Other
NCU00953	-0.0413981	1	1	25.6285	25.9572	Other
NCU00954	0.0971287	1	0.866848	32.9978	30.287	Other
NCU00955	-0.0999926	1	0.836524	27.2588	28.7681	Other
NCU00956	-0.0552358	1	0.90441	31.8616	32.5704	Other
NCU00957	-0.0467353	1	0.961212	31.2103	31.756	Other
NCU00958	0.0318061	1	0.979445	27.9465	26.8592	Other
NCU00959	-0.00756336	1	1	29.4704	29.1485	Other
NCU00960	0.0517965	1	0.980145	30.3868	28.6062	Other
NCU00961	-0.00203207	1	1	18.7126	18.545	Other
NCU00962	0.0123794	1	1	26.9715	26.2985	Other
NCU00963	-0.103657	1	0.786572	29.6677	31.2987	Other
NCU00964	-0.0348874	1	0.959912	29.2023	29.4433	Other
NCU00965	-0.151565	1	0.724806	27.8425	30.5516	Other
NCU00966	-0.0470067	1	0.960578	29.9641	30.4422	Other
NCU00967	0.0329425	1	0.980145	30.0811	28.8961	Other
NCU00968	-0.128344	1	0.779412	27.7279	29.8192	Other
NCU00969	0.0671608	1	0.925651	34.6745	32.5756	Other
NCU00970	0.191116	1	0.625541	39.9687	34.3603	Other
NCU00971	0.07598	1	0.91952	29.5431	27.5974	Other
NCU00972	0.0267183	1	1	44.8979	43.3514	Other
NCU00973	-0.0191457	1	0.967751	45.2868	45.0192	Other
NCU00974	-0.237819	1	0.484605	29.8335	34.6114	Other
NCU00975	0.06427	1	0.876022	38.2355	35.977	Other
NCU00976	0.123679	1	0.795415	28.5923	25.78	Other
NCU00977	-0.0367797	1	1	25.6785	25.9414	Other
NCU00978	-0.149299	1	0.767178	24.8893	27.1407	Other
NCU00979	-0.0409564	1	1	29.4941	29.8599	Other
NCU00980	0.111281	1	0.795415	28.4515	25.9122	Other
NCU00981	-0.164055	1	0.62344	29.3538	32.3744	Other
NCU00983	0.014864	1	1	28.2254	27.5571	Other
NCU00984	0.0643226	1	0.864756	31.908	30.0397	Other
NCU00985	0.174886	1	0.681189	29.7433	25.9515	Other
NCU00986	0.128603	1	0.798953	29.7677	26.6569	Other
NCU00987	0.147363	1	0.753802	33.0888	29.3403	Other
NCU00988	0.298092	1	0.380646	35.9874	28.7431	Other
NCU00989	-0.116494	1	0.796576	17.2354	18.3527	Other
NCU00990	0.0158049	1	1	34.3726	33.4411	Other
NCU00992	0.0156842	1	1	26.6017	25.9474	Other
NCU00993	-0.0385507	1	0.959211	28.1042	28.3592	Other
NCU00994	0.121241	1	0.709208	35.4723	32.0576	Other
NCU00995	-0.535718	1	0.3216	13.326	19.0643	Other
NCU00998	0.03084	1	0.979445	27.9043	26.8896	Other
NCU00999	0.0206847	1	1	30.6667	29.6828	Other
NCU01000	0.0729726	1	0.92215	31.7702	29.6833	Other
NCU01001	0.0597441	1	0.925651	34.6126	32.7523	Other
NCU01002	0.112399	1	0.811467	33.7499	30.7308	Other
NCU01003	0.184522	1	0.888314	15.2962	13.3869	Other
NCU01004	0.0109106	1	1	23.9096	23.3803	Other
NCU01005	-0.432904	1	0.270309	19.3524	25.6396	Other
NCU01006	-0.00244794	1	1	27.0972	26.7532	Other
NCU01007	0.103109	1	0.85528	28.3844	25.9212	Other
NCU01008	0.0553592	1	0.980469	31.0584	29.3343	Other
NCU01009	0.19826	1	0.580561	40.524	34.6848	Other
NCU01010	-0.54295	1	0.122235	22.8877	32.8291	Other
NCU01011	0.234634	1	0.457154	42.0347	35.0828	Other
NCU01012	0.11805	1	0.811467	33.6209	30.394	Other
NCU01013	0.232067	1	0.58232	31.7752	26.6258	Other
NCU01014	0.114903	1	0.760966	35.3373	32.0461	Other
NCU01015	-0.00851792	1	1	30.0711	29.7397	Other
NCU01016	0.0146831	1	1	27.395	26.6912	Other
NCU01017	0.0541704	1	0.915024	26.5224	25.1793	Other
NCU01019	-0.028439	1	1	24.8829	24.9433	Other
NCU01021	0.0912475	1	0.909679	23.5153	21.7156	Other
NCU01022	-0.0841532	1	0.83355	26.205	27.3274	Other
NCU01023	-0.0613567	1	0.955988	24.3456	24.967	Other
NCU01024	0.141942	1	0.7373	29.3932	26.181	Other
NCU01025	0.0360063	1	1	24.3637	23.2784	Other
NCU01026	-0.0722987	1	0.899629	28.5849	29.5507	Other
NCU01027	0.344039	1	0.25922	43.7279	33.8822	Other
NCU01032	-0.0741499	1	0.956865	25.1896	26.1495	Other
NCU01033	0.179126	1	0.605691	35.7985	31.0344	Other
NCU01034	-0.239264	1	0.61371	19.4	22.6775	Other
NCU01036	0.117288	1	0.85528	27.9817	25.3879	Other
NCU01038	-0.0535866	1	0.955055	23.1075	23.604	Other
NCU01039	0.139162	1	0.795415	28.6867	25.588	Other
NCU01041	0.22361	1	0.546958	34.1157	28.7686	Other
NCU01042	0.0772537	1	0.923371	32.6143	30.3158	Other
NCU01043	0.151342	1	0.7373	29.139	25.8309	Other
NCU01044	0.00680526	1	1	27.5139	26.9044	Other
NCU01045	-0.0898633	1	0.891972	24.8756	26.0359	Other
NCU01047	0.084173	1	0.978666	26.1495	24.2431	Other
NCU01048	0.249875	1	0.533836	32.1623	26.5483	Other
NCU01049	0.124512	1	0.802314	30.5121	27.5208	Other
NCU01050	0.297655	1	0.394637	38.138	30.436	Other
NCU01051	0.0149557	1	1	35.4517	34.4078	Other
NCU01052	0.179914	1	0.691408	31.4851	27.2802	Other
NCU01053	0.0409731	1	0.918102	28.4265	27.1806	Other
NCU01054	-0.0850214	1	0.849324	32.4421	33.714	Other
NCU01055	0.0699046	1	0.91952	29.6197	27.7089	Other
NCU01056	0.00135056	1	1	32.8077	32.2056	Other
NCU01057	0.193102	1	0.62086	38.6755	33.3343	Other
NCU01058	0.328412	1	0.288574	38.4924	30.1243	Other
NCU01059	0.176163	1	0.691408	31.7757	27.5891	Other
NCU01060	-0.0793838	1	0.853663	33.7979	35.305	Other
NCU01061	0.425979	1	0.178875	43.1454	31.5342	Other
NCU01063	-0.178312	1	0.667536	27.6151	30.6768	Other
NCU01064	0.121993	1	0.764322	36.4415	32.8449	Other
NCU01065	-0.0201657	1	1	31.99	31.878	Other
NCU01066	0.0154575	1	1	32.9479	32.0115	Other
NCU01067	-0.0312168	1	1	30.5753	30.7996	Other
NCU01068	0.0601056	1	0.980145	30.3855	28.6786	Other
NCU01069	-0.107701	1	0.786572	29.6524	31.4321	Other
NCU01070	0.011676	1	1	30.8837	30.1512	Other
NCU01071	0.197225	1	0.570201	38.275	32.7895	Other
NCU01072	-0.462942	1	0.251985	20.6384	28.0417	Other
NCU01073	-0.447025	1	0.313115	19.4115	26.1675	Other
NCU01074	-0.14139	1	0.73741	31.1907	33.9236	Other
NCU01075	0.179549	1	0.696163	32.9257	28.5471	Other
NCU01076	-0.0125769	1	1	32.6872	32.4629	Other
NCU01077	0.125989	1	0.811467	33.7089	30.2633	Other
NCU01078	0.0221805	1	1	30.2719	29.3232	Other
NCU01079	-0.044458	1	0.965379	39.2406	39.6415	Other
NCU01080	0.045789	1	0.978666	25.8735	24.7087	Other
NCU01081	0.0962967	1	0.87764	39.4845	36.3048	Other
NCU01082	0.118039	1	0.808558	32.6876	29.5228	Other
NCU01083	-0.0237706	1	1	29.8624	29.863	Other
NCU01084	0.0677298	1	0.92215	31.5025	29.579	Other
NCU01085	-0.12795	1	0.77555	26.4566	28.4673	Other
NCU01086	-0.138754	1	0.78308	28.6372	31.0674	Other
NCU01087	0.378756	1	0.313603	28.0418	21.1481	Other
NCU01088	0.240863	1	0.501739	34.5209	28.7414	Other
NCU01089	0.00750105	1	1	25.6803	25.1347	Other
NCU01090	0.343119	1	0.373288	35.1126	27.1791	Other
NCU01091	0.339786	1	0.373288	35.356	27.4722	Other
NCU01092	0.125088	1	0.798953	29.5915	26.6492	Other
NCU01093	0.0367979	1	1	32.9236	31.5304	Other
NCU01094	0.239696	1	0.438829	38.5969	32.0685	Other
NCU01095	0.0426511	1	0.98188	36.3522	34.6794	Other
NCU01096	0.0669097	1	0.972773	15.5972	14.9292	Other
NCU01097	0.0483714	1	0.916606	27.522	26.1679	Other
NCU01098	0.215184	1	0.633228	31.2161	26.4603	Other
NCU01099	0.162654	1	0.78774	26.8404	23.5524	Other
NCU01100	0.140901	1	0.791683	27.7972	24.7677	Other
NCU01101	-0.0186296	1	1	36.771	36.6837	Other
NCU01102	0.173139	1	0.700704	33.6218	29.2703	Other
NCU01103	0.344753	1	0.302097	40.7934	31.6318	Other
NCU01104	-0.00747909	1	1	28.316	27.9388	Other
NCU01105	0.13273	1	0.814247	34.9835	31.3331	Other
NCU01106	0.0155687	1	1	33.6058	32.6738	Other
NCU01107	0.0693208	1	0.923371	32.784	30.6568	Other
NCU01108	0.0448849	1	1	33.8337	32.2617	Other
NCU01109	0.1235	1	0.811467	33.6069	30.4589	Other
NCU01111	0.598742	1	0.058012	44.0856	28.6475	Other
NCU01112	0.146237	1	0.757463	34.179	30.2637	Other
NCU01113	0.231012	1	0.520585	37.7686	31.6838	Other
NCU01114	-0.00625719	1	1	29.4451	29.0285	Other
NCU01115	0.0150552	1	0.982365	38.0184	36.9841	Other
NCU01116	0.0431248	1	0.979067	27.3875	26.1349	Other
NCU01118	0.0104211	1	1	33.9952	33.2199	Other
NCU01119	-0.0957914	1	0.894049	25.694	27.0417	Other
NCU01120	0.259925	1	0.49495	33.5473	27.4927	Other
NCU01121	0.0260037	1	1	33.6071	32.4712	Other
NCU01122	0.107066	1	0.802314	30.5655	27.8643	Other
NCU01123	0.10168	1	0.852583	27.1807	24.8502	Other
NCU01124	0.0629314	1	0.980145	29.9023	28.2184	Other
NCU01127	-0.148953	1	0.77555	26.5064	29.0451	Other
NCU01132	0.325531	1	0.373288	35.2699	27.6618	Other
NCU01134	0.157241	1	0.749969	32.1306	28.3048	Other
NCU01135	-0.00803108	1	1	26.4414	26.1105	Other
NCU01136	-0.037732	1	1	29.7656	29.9162	Other
NCU01138	0.182636	1	0.732629	28.2699	24.4897	Other
NCU01140	0.07477	1	0.920868	30.8485	28.7929	Other
NCU01141	-0.166938	1	0.667536	27.7709	30.7134	Other
NCU01142	-0.0885233	1	0.896011	26.5945	27.8884	Other
NCU01143	0.0795477	1	0.915024	26.8725	25.0076	Other
NCU01144	-0.0117028	1	1	27.3147	27.095	Other
NCU01145	0.0102862	1	1	29.1226	28.4354	Other
NCU01146	-0.159857	1	0.724806	28.1734	30.9949	Other
NCU01147	0.0096854	1	1	33.8887	33.0624	Other
NCU01148	-0.26875	1	0.454805	25.6866	30.511	Other
NCU01149	-0.406257	1	0.323759	20.7129	27.0522	Other
NCU01150	-0.0252929	1	1	25.8209	25.8351	Other
NCU01151	0.195291	1	0.600217	34.9257	29.973	Other
NCU01153	-0.615856	1	0.1814	12.0632	18.4598	Other
NCU01154	-0.0637054	1	0.957691	26.1134	26.8213	Other
NCU01156	0.115926	1	0.745952	31.052	28.1454	Other
NCU01157	0.0458802	1	0.979804	29.1671	27.7822	Other
NCU01158	0.0814615	1	0.860259	30.1365	28.0325	Other
NCU01159	-0.564006	1	0.18472	14.5366	21.3247	Other
NCU01160	-0.140311	1	0.704781	24.1682	26.2405	Other
NCU01161	0.0137019	1	1	28.8248	28.0852	Other
NCU01162	0.0930655	1	0.862562	31.4049	28.9509	Other
NCU01163	0.0536853	1	0.91952	29.6046	28.0602	Other
NCU01164	-0.057689	1	0.955988	24.0898	24.6389	Other
NCU01165	0.0799325	1	0.849729	25.9366	24.1528	Other
NCU01166	-0.188556	1	0.605243	26.2127	29.4059	Other
NCU01167	-0.444702	1	0.235163	22.3051	29.861	Other
NCU01169	0.0653724	1	0.866848	32.9194	30.9672	Other
NCU01170	0.0100902	1	1	31.52	30.793	Other
NCU01171	0.0803986	1	0.923371	32.4947	30.1937	Other
NCU01172	0.127797	1	0.795415	28.6306	25.7434	Other
NCU01173	0.0736739	1	0.927739	36.8602	34.3971	Other
NCU01174	0.0311992	1	1	29.929	28.7712	Other
NCU01175	-0.14311	1	0.771479	25.7842	28.07	Other
NCU01176	-0.0241526	1	1	28.6312	28.6177	Other
NCU01177	-0.108907	1	0.741242	32.1769	34.1388	Other
NCU01178	0.13395	1	0.753802	32.9829	29.5724	Other
NCU01179	-0.0765571	1	0.902893	30.74	31.9407	Other
NCU01180	-0.0358337	1	0.961816	32.3439	32.6128	Other
NCU01181	0.0672049	1	0.925651	34.7461	32.5692	Other
NCU01182	0.00174384	1	1	31.1632	30.5337	Other
NCU01183	-0.0401835	1	0.958472	27.3747	27.6402	Other
NCU01184	0.00179727	1	1	33.5321	32.8832	Other
NCU01185	-0.0806528	1	0.804482	35.9038	37.296	Other
NCU01186	-0.0283985	1	1	25.9479	26.0187	Other
NCU01187	-0.00278953	1	1	25.4199	25.0463	Other
NCU01188	-0.0906734	1	0.889768	23.7258	24.7721	Other
NCU01189	0.00489557	1	1	30.3858	29.759	Other
NCU01190	0.103789	1	0.91952	29.8845	27.3206	Other
NCU01191	-0.276128	1	0.508786	20.6244	24.6159	Other
NCU01192	-0.00150888	1	1	30.1902	29.7666	Other
NCU01193	-0.106768	1	0.77555	26.8752	28.465	Other
NCU01195	-0.084959	1	0.836524	27.2265	28.4482	Other
NCU01196	-0.0268423	1	0.958472	27.2469	27.2957	Other
NCU01197	-0.0794536	1	0.954061	22.1205	23.0162	Other
NCU01198	-0.0276751	1	1	33.9077	34.0718	Other
NCU01199	-0.111023	1	0.7899	30.7826	32.6879	Other
NCU01200	-0.222557	1	0.582689	30.3528	34.9553	Other
NCU01201	0.0220711	1	1	30.1132	29.2304	Other
NCU01202	-0.0887876	1	0.842024	29.3718	30.7291	Other
NCU01203	0.00105739	1	1	38.1279	37.432	Other
NCU01204	0.0236765	1	1	28.6749	27.7754	Other
NCU01205	-0.15053	1	0.639336	32.3699	35.3943	Other
NCU01206	-0.116355	1	0.894049	25.5139	27.2084	Other
NCU01207	-0.093829	1	0.83355	26.3968	27.7046	Other
NCU01208	-0.0758983	1	0.844574	30.2798	31.3567	Other
NCU01209	0.296777	1	0.352028	43.2209	34.6026	Other
NCU01210	0.184924	1	0.580561	40.1048	34.5894	Other
NCU01211	-0.0469157	1	0.90441	31.617	32.1597	Other
NCU01212	-0.1341	1	0.661879	37.2952	40.3778	Other
NCU01213	-0.035866	1	1	36.5453	36.8641	Other
NCU01214	0.110616	1	0.834743	44.0437	40.0591	Other
NCU01215	-0.0692722	1	0.902893	30.8209	31.7632	Other
NCU01216	-0.0443708	1	0.959912	29.0115	29.4306	Other
NCU01218	-0.166803	1	0.650087	24.6556	27.3368	Other
NCU01219	-0.281607	1	0.423446	27.0519	32.4167	Other
NCU01220	-0.117813	1	0.827079	24.1767	25.808	Other
NCU01221	0.0158714	1	1	31.5401	30.5906	Other
NCU01223	-0.0497565	1	0.870849	44.461	45.2977	Other
NCU01224	-0.0311437	1	1	29.5336	29.6557	Other
NCU01225	-0.291223	1	0.415443	26.1525	31.4937	Other
NCU01227	-0.157357	1	0.729207	29.0847	31.9528	Other
NCU01229	-0.00867628	1	1	32.7996	32.4618	Other
NCU01230	0.127232	1	0.76754	37.4476	33.6874	Other
NCU01231	-0.0591553	1	0.902893	30.9319	31.6549	Other
NCU01233	0.188956	1	0.542698	41.9215	36.0393	Other
NCU01234	0.0410796	1	0.981353	34.024	32.4687	Other
NCU01235	0.0897277	1	0.920868	30.7093	28.4048	Other
NCU01236	-0.0576534	1	0.963473	35.0491	35.9035	Other
NCU01238	-0.0218032	1	1	24.9345	24.9143	Other
NCU01240	-0.0581265	1	1	25.4378	26.084	Other
NCU01241	-0.133126	1	0.77555	26.7158	28.8987	Other
NCU01242	-0.0698404	1	0.902893	30.6601	31.6323	Other
NCU01243	-0.0626804	1	0.894049	25.8089	26.5649	Other
NCU01245	-0.059824	1	0.897868	27.5661	28.2494	Other
NCU01246	-0.125952	1	0.779412	27.8684	29.8913	Other
NCU01247	-0.082733	1	0.827079	24.3199	25.3519	Other
NCU01248	0.187269	1	0.649456	34.2546	29.5772	Other
NCU01249	-0.232735	1	0.504951	26.1263	30.2083	Other
NCU01250	-0.0106234	1	1	32.6129	32.3811	Other
NCU01252	-0.0750269	1	0.958472	27.1726	28.187	Other
NCU01253	-0.103708	1	0.78308	28.7512	30.3499	Other
NCU01254	0.043681	1	1	28.5832	27.2443	Other
NCU01255	0.0113275	1	1	23.8106	23.2561	Other
NCU01256	-0.22071	1	0.598567	25.0176	28.6664	Other
NCU01257	-0.172802	1	0.729207	29.0239	32.1061	Other
NCU01258	0.0731979	1	0.872585	35.984	33.6395	Other
NCU01259	-0.17009	1	0.62897	30.0695	33.164	Other
NCU01260	0.0949272	1	0.808558	32.4752	29.8721	Other
NCU01261	0.234034	1	0.508263	35.8319	29.846	Other
NCU01262	0.34406	1	0.312175	37.0975	28.7673	Other
NCU01266	-0.115891	1	0.724806	28.3517	30.2561	Other
NCU01267	-0.0169037	1	1	29.8784	29.7543	Other
NCU01268	-0.189792	1	0.656205	25.6792	28.851	Other
NCU01269	-0.1528	1	0.771479	25.6648	28.0942	Other
NCU01270	0.0619734	1	0.932275	41.8836	39.4678	Other
NCU01271	-0.0449426	1	1	25.5638	25.966	Other
NCU01272	-0.0487307	1	1	23.628	24.0738	Other
NCU01273	-0.158916	1	0.672798	28.5735	31.4191	Other
NCU01274	0.0214494	1	1	28.8149	27.9693	Other
NCU01275	-0.104256	1	0.78308	28.5877	30.196	Other
NCU01276	0.146374	1	0.760966	35.2219	31.3412	Other
NCU01277	-0.0669568	1	0.956865	25.229	25.9703	Other
NCU01278	-0.0740428	1	0.958472	27.1847	28.1387	Other
NCU01279	-0.0852113	1	0.7899	30.8784	32.2231	Other
NCU01281	0.0822027	1	0.876022	38.3031	35.5461	Other
NCU01282	-0.16686	1	0.611598	27.2989	30.1872	Other
NCU01283	-0.215463	1	0.629572	21.4615	24.5629	Other
NCU01284	0.200293	1	0.627297	30.3555	25.8946	Other
NCU01285	0.0489211	1	0.924537	33.5446	31.8746	Other
NCU01288	-0.0422936	1	0.957691	26.0766	26.4243	Other
NCU01289	-0.0707977	1	0.959912	28.9331	29.8958	Other
NCU01290	-0.203709	1	0.598567	25.3506	28.7455	Other
NCU01291	0.048283	1	1	27.612	26.2371	Other
NCU01292	0.0230539	1	0.982365	38.3929	37.0362	Other
NCU01294	0.111334	1	0.808558	32.5097	29.5477	Other
NCU01296	-0.106005	1	0.748428	34.1524	36.1559	Other
NCU01297	-0.202532	1	0.576753	29.5622	33.4584	Other
NCU01298	0.0108823	1	1	36.736	35.6899	Other
NCU01299	-0.299778	1	0.423446	27.1406	32.9771	Other
NCU01300	0.141909	1	0.659151	36.0772	32.1145	Other
NCU01301	-0.167519	1	0.687201	31.8548	35.1204	Other
NCU01302	-0.186359	1	0.588383	31.6932	35.5404	Other
NCU01303	0.0891271	1	0.872585	35.9755	33.264	Other
NCU01304	0.118363	1	0.795415	28.7071	26.0271	Other
NCU01305	0.0275406	1	1	31.4982	30.3576	Other
NCU01306	-0.131986	1	0.729207	29.1158	31.4068	Other
NCU01307	-0.207249	1	0.667536	27.3996	31.1657	Other
NCU01308	-0.114357	1	0.856213	13.7666	14.7197	Other
NCU01309	-0.108371	1	0.77555	26.7114	28.3444	Other
NCU01310	-0.0828011	1	0.842024	29.2637	30.4494	Other
NCU01311	0.155758	1	0.676352	40.0844	35.3712	Other
NCU01312	0.010551	1	1	34.9615	34.1371	Other
NCU01313	-0.246671	1	0.636813	15.1687	17.8703	Other
NCU01314	0.0690422	1	0.918102	28.8215	26.9917	Other
NCU01315	0.0726854	1	0.920868	30.611	28.61	Other
NCU01317	-0.00818409	1	1	27.2491	27.0377	Other
NCU01318	-0.0729163	1	0.889768	23.7997	24.6823	Other
NCU01319	-0.0402115	1	1	24.6087	24.8766	Other
NCU01320	0.00368031	1	1	33.9972	33.4234	Other
NCU01321	0.00952631	1	1	38.103	37.1772	Other
NCU01322	0.00841196	1	1	26.4279	25.8951	Other
NCU01323	-0.033897	1	0.955988	24.1117	24.2653	Other
NCU01324	0.0639304	1	0.926717	35.6958	33.5329	Other
NCU01325	0.126026	1	0.760966	35.3404	31.7732	Other
NCU01326	0.0713337	1	0.874339	37.11	34.726	Other
NCU01327	0.117275	1	0.78774	26.5673	24.032	Other
NCU01328	-0.17804	1	0.650087	24.8126	27.6148	Other
NCU01329	-0.157335	1	0.687201	31.8327	34.9869	Other
NCU01330	-0.00147406	1	1	29.1005	28.6372	Other
NCU01331	0.246333	1	0.42593	43.2608	36.0111	Other
NCU01332	-0.08599	1	0.897868	27.6976	28.911	Other
NCU01333	-0.00338388	1	1	25.5147	25.1672	Other
NCU01334	-0.39524	1	0.359488	20.057	26.0591	Other
NCU01335	0.0264401	1	1	27.1632	26.2339	Other
NCU01336	-0.0128228	1	1	31.3382	31.0631	Other
NCU01337	-0.0770076	1	0.908568	34.7566	35.9921	Other
NCU01338	0.046409	1	0.925651	34.6847	33.0924	Other
NCU01339	-0.206932	1	0.605243	26.3113	29.8743	Other
NCU01340	-0.148871	1	0.77555	26.4938	28.8672	Other
NCU01341	0.0275548	1	0.979445	28.1568	27.1882	Other
NCU01342	-0.00352537	1	1	34.4104	33.9718	Other
NCU01343	0.115478	1	0.753802	33.1704	30.1105	Other
NCU01344	-0.0497627	1	0.958472	27.0814	27.5727	Other
NCU01345	-0.049326	1	1	26.5352	27.0252	Other
NCU01346	-0.0933276	1	0.944566	14.8343	15.6392	Other
NCU01347	-0.0315404	1	0.963473	35.0567	35.2628	Other
NCU01348	0.0323012	1	0.981353	34.1068	32.7476	Other
NCU01349	0.138456	1	0.852583	27.3919	24.4538	Other
NCU01350	0.206017	1	0.616	37.7477	32.1695	Other
NCU01351	0.174019	1	0.649456	34.3099	29.9342	Other
NCU01353	0.0270455	1	1	27.2531	26.3426	Other
NCU01355	-0.179367	1	0.672798	28.6105	31.8467	Other
NCU01356	-0.316042	1	0.389327	23.2047	28.4717	Other
NCU01357	0.0138785	1	1	39.246	38.2412	Other
NCU01358	-0.00319889	1	1	27.0655	26.6099	Other
NCU01360	-0.324006	1	0.322029	28.849	35.5939	Other
NCU01361	-0.0402792	1	1	26.7135	27.0367	Other
NCU01362	-0.105067	1	0.897868	27.4954	29.0698	Other
NCU01364	-0.231641	1	0.550205	25.7666	29.8075	Other
NCU01365	0.00288165	1	1	31.4851	30.8815	Other
NCU01366	-0.00180431	1	1	26.7221	26.3736	Other
NCU01367	0.0845134	1	0.918102	28.8411	26.7355	Other
NCU01368	-0.033964	1	0.960578	30.3971	30.6261	Other
NCU01369	0.0169219	1	1	26.6905	25.9668	Other
NCU01370	-0.242911	1	0.52622	29.2724	34.1433	Other
NCU01371	-0.104613	1	0.801808	34.5063	36.5004	Other
NCU01373	0.15576	1	0.713197	36.9475	32.6034	Other
NCU01374	-0.0434633	1	0.963473	35.2961	35.8583	Other
NCU01375	-0.21187	1	0.643631	23.4061	26.8894	Other
NCU01376	0.160912	1	0.700704	33.7062	29.6586	Other
NCU01377	-0.0447996	1	0.959912	29.3527	29.7824	Other
NCU01378	-0.0856152	1	0.839345	28.1308	29.3691	Other
NCU01379	0.0135979	1	1	26.1633	25.4983	Other
NCU01380	0.0305363	1	0.982593	39.0442	37.5863	Other
NCU01381	0.00481653	1	1	38.5967	37.6925	Other
NCU01382	0.0134645	1	1	32.2995	31.4849	Other
NCU01383	-0.125386	1	0.830407	25.3783	27.1856	Other
NCU01385	-0.181043	1	0.70433	14.7601	16.4317	Other
NCU01386	0.135585	1	0.753802	33.2034	29.7217	Other
NCU01387	0.075477	1	0.92215	31.8412	29.6534	Other
NCU01388	0.106382	1	0.862562	31.266	28.5711	Other
NCU01389	-0.447083	1	0.235163	22.2958	29.9295	Other
NCU01390	-0.0788519	1	0.849324	31.9575	33.2064	Other
NCU01391	-0.0316866	1	0.965379	39.4409	39.6769	Other
NCU01392	-0.292903	1	0.585575	16.5486	19.9836	Other
NCU01393	-0.151543	1	0.687201	31.7678	34.6918	Other
NCU01394	0.0935752	1	0.864756	32.0578	29.5724	Other
NCU01395	-0.0983892	1	0.901301	29.6328	31.1539	Other
NCU01396	-0.0746699	1	1	16.4861	17.0818	Other
NCU01397	-0.0101479	1	1	35.7037	35.3224	Other
NCU01398	-0.0354344	1	1	32.5188	32.7662	Other
NCU01399	-0.0237112	1	0.962393	33.2188	33.2237	Other
NCU01400	-0.0975421	1	0.902893	30.4951	32.0955	Other
NCU01401	-0.0298199	1	1	29.955	30.1079	Other
NCU01402	-0.0889723	1	0.90441	31.6221	33.0817	Other
NCU01403	0.0242257	1	1	29.705	28.7355	Other
NCU01404	0.0514113	1	0.981072	33.2177	31.4804	Other
NCU01407	0.124334	1	0.76754	37.071	33.4191	Other
NCU01408	-0.073948	1	0.836524	27.3127	28.2584	Other
NCU01409	0.00701508	1	1	27.1072	26.5095	Other
NCU01410	0.0928277	1	0.91952	29.5192	27.2507	Other
NCU01411	-0.0485106	1	0.964464	37.1759	37.8127	Other
NCU01412	0.106986	1	0.852583	27.1586	24.7903	Other
NCU01413	0.0356717	1	0.978666	26.1102	25.0405	Other
NCU01414	-0.050289	1	1	27.4175	27.942	Other
NCU01415	-0.971474	1	0.0567008	9.2608	18.0338	Other
NCU01416	-0.832771	1	0.116765	9.56077	16.9779	Other
NCU01417	-0.0550444	1	0.963979	36.149	36.9476	Other
NCU01418	0.049316	1	1	26.9337	25.5731	Other
NCU01419	-0.102024	1	0.77555	26.8744	28.3664	Other
NCU01420	-0.0179161	1	1	30.1516	30.0275	Other
NCU01421	0.000375587	1	1	35.2796	34.649	Other
NCU01422	0.0147962	1	1	28.4217	27.6138	Other
NCU01423	-0.143316	1	0.691596	32.775	35.5203	Other
NCU01424	-0.123025	1	0.767178	24.5901	26.2718	Other
NCU01425	-0.0378032	1	1	31.4673	31.8089	Other
NCU01426	0.0179131	1	1	27.6698	26.8541	Other
NCU01427	-0.1356	1	0.767178	24.7648	26.8082	Other
NCU01428	-0.413611	1	0.359488	19.8052	26.0682	Other
NCU01429	-0.0641161	1	0.899629	28.5025	29.3114	Other
NCU01430	-0.159653	1	0.720183	27.2773	29.9972	Other
NCU01431	-0.0744809	1	0.891972	24.859	25.7697	Other
NCU01432	-0.247025	1	0.477609	28.6245	33.4101	Other
NCU01433	-0.158755	1	0.672798	28.8741	31.7269	Other
NCU01434	-0.456934	1	0.211042	22.8386	30.8876	Other
NCU01435	-0.0954818	1	0.7899	30.658	32.2594	Other
NCU01436	-0.122303	1	0.796114	32.5306	34.9479	Other
NCU01438	-0.201851	1	0.636805	22.5214	25.5438	Other
NCU01439	0.0873046	1	0.913349	25.4793	23.6444	Other
NCU01440	-0.134556	1	0.767178	24.8496	26.8505	Other
NCU01441	-0.0375608	1	1	33.9003	34.1109	Other
NCU01442	-0.00298367	1	1	33.6649	33.1523	Other
NCU01443	-0.030121	1	0.961816	32.1697	32.3289	Other
NCU01444	-0.230441	1	0.504951	26.3484	30.4396	Other
NCU01445	0.12632	1	0.717027	37.8025	34.049	Other
NCU01446	-0.111785	1	0.836524	27.1905	28.8847	Other
NCU01447	-0.138889	1	0.733403	30.2767	32.8009	Other
NCU01448	0.0278572	1	1	17.8228	17.3279	Other
NCU01449	-0.126405	1	0.7899	30.5368	32.8729	Other
NCU01450	-0.521601	1	0.305773	12.2867	17.5347	Other
NCU01451	-0.16152	1	0.667536	27.6242	30.4737	Other
NCU01452	-0.0594396	1	0.959211	27.9628	28.6802	Other
NCU01453	-0.286188	1	0.526675	22.52	26.985	Other
NCU01454	-0.0242376	1	0.961212	31.2215	31.214	Other
NCU01455	0.123913	1	0.862562	31.4322	28.3212	Other
NCU01456	-0.0738688	1	0.839345	28.1485	29.1901	Other
NCU01457	-0.140945	1	0.682613	30.7243	33.3438	Other
NCU01458	-0.25955	1	0.512353	27.2404	32.0511	Other
NCU01459	-0.131716	1	0.710194	25.3614	27.3399	Other
NCU01460	-0.165855	1	0.672798	28.5129	31.4557	Other
NCU01461	-0.0246697	1	1	26.779	26.7934	Other
NCU01462	0.309549	1	0.326224	39.1965	31.0277	Other
NCU01463	0.0859466	1	0.857835	28.9723	26.8516	Other
NCU01464	0.0818973	1	0.868846	34.3316	31.9339	Other
NCU01465	-0.0169453	1	0.958472	27.3612	27.2656	Other
NCU01466	-0.113787	1	0.889768	23.4716	25.02	Other
NCU01467	-0.0236639	1	0.960578	30.3249	30.3537	Other
NCU01468	0.130877	1	0.7373	29.0897	26.123	Other
NCU01469	-0.0311757	1	0.959912	29.2377	29.3615	Other
NCU01470	-0.146339	1	0.767178	24.4545	26.6114	Other
NCU01471	-0.0547188	1	0.961816	32.3509	33.0139	Other
NCU01472	0.2273	1	0.51454	36.8503	30.9259	Other
NCU01473	0.216141	1	0.546958	34.0153	28.7666	Other
NCU01474	-0.144548	1	0.71532	26.2065	28.4752	Other
NCU01475	0.0107519	1	1	26.6655	26.0712	Other
NCU01476	-0.0887093	1	0.842024	28.9762	30.2952	Other
NCU01477	0.0350674	1	1	25.7379	24.7241	Other
NCU01478	-0.0113988	1	1	26.0824	25.871	Other
NCU01479	0.0849652	1	0.913349	25.7033	23.8212	Other
NCU01480	-0.222191	1	0.598567	25.3169	29.0212	Other
NCU01481	-0.131314	1	0.830407	25.1143	27.1047	Other
NCU01483	-0.177993	1	0.62897	30.0107	33.5313	Other
NCU01484	-0.152526	1	0.704781	24.1803	26.4152	Other
NCU01485	-0.00217478	1	1	29.3103	28.772	Other
NCU01486	0.118296	1	0.78774	26.5236	24.0217	Other
NCU01487	-0.105205	1	0.842024	28.9632	30.6176	Other
NCU01488	-0.229226	1	0.70433	14.3231	16.6877	Other
NCU01489	-0.0635188	1	0.956865	24.9262	25.6528	Other
NCU01490	-0.117087	1	0.741242	32.0478	34.1681	Other
NCU01491	0.0441418	1	1	29.8306	28.4829	Other
NCU01493	0.112964	1	0.816907	35.9565	32.675	Other
NCU01494	0.131983	1	0.760966	35.1741	31.5055	Other
NCU01495	0.0566101	1	0.981072	33.5091	31.6236	Other
NCU01496	0.109495	1	0.819456	36.7634	33.4303	Other
NCU01498	0.00509976	1	1	24.7452	24.317	Other
NCU01499	0.0070284	1	1	26.019	25.4594	Other
NCU01500	-0.295099	1	0.446523	24.3146	29.4994	Other
NCU01501	0.100289	1	0.798953	29.4596	27.0503	Other
NCU01502	-0.0890614	1	0.842024	28.9754	30.3439	Other
NCU01503	-0.20365	1	0.650087	24.7095	28.0183	Other
NCU01504	-0.0139421	1	1	32.7952	32.67	Other
NCU01505	-0.217466	1	0.561684	34.9875	40.0176	Other
NCU01506	0.0294944	1	1	35.5701	34.2919	Other
NCU01509	-0.0709157	1	1	23.443	24.232	Other
NCU01510	0.0345356	1	0.980145	29.9809	28.7822	Other
NCU01511	0.107186	1	0.916606	27.6839	25.2499	Other
NCU01512	-0.0911185	1	0.839345	28.4087	29.7675	Other
NCU01514	-0.0289391	1	1	27.7606	27.8852	Other
NCU01515	-0.036093	1	1	30.7715	31.0462	Other
NCU01516	-0.153599	1	0.729207	29.0625	31.8217	Other
NCU01517	0.0757072	1	0.92215	31.7282	29.5709	Other
NCU01519	0.0111869	1	1	16.3197	16.1184	Other
NCU01520	-0.227534	1	0.512353	27.348	31.4406	Other
NCU01521	-0.262783	1	0.470325	27.8204	32.8596	Other
NCU01522	0.0732737	1	0.926717	35.9659	33.5835	Other
NCU01523	-0.0439303	1	0.958472	27.1529	27.5684	Other
NCU01524	-0.183534	1	0.62344	29.4126	32.8619	Other
NCU01525	-0.0273516	1	0.959912	29.2322	29.3042	Other
NCU01526	-0.100998	1	0.894049	25.431	26.8146	Other
NCU01527	0.0587762	1	0.916606	27.4948	25.9665	Other
NCU01528	0.0351221	1	0.979445	27.9547	26.8862	Other
NCU01529	0.0410599	1	1	24.3301	23.3058	Other
NCU01530	0.244733	1	0.484705	39.5012	32.7505	Other
NCU01531	0.279961	1	0.480504	31.718	25.6733	Other
NCU01532	0.299641	1	0.39596	32.5041	25.969	Other
NCU01534	0.0718818	1	0.91952	29.7874	27.8288	Other
NCU01535	0.00914671	1	1	26.9985	26.4389	Other
NCU01536	-0.424577	1	0.312278	16.2361	21.4169	Other
NCU01539	-0.00319348	1	1	26.5236	26.1746	Other
NCU01540	-0.0971943	1	0.894049	25.5047	26.864	Other
NCU01541	-0.356365	1	0.32863	25.1077	31.7222	Other
NCU01542	-0.00807753	1	1	30.1248	29.7887	Other
NCU01543	-0.0664626	1	0.896011	26.5501	27.3821	Other
NCU01545	-0.00583914	1	1	30.2025	29.7725	Other
NCU01546	0.333619	1	0.436869	32.4044	25.2706	Other
NCU01547	-0.0819516	1	0.836524	27.3661	28.4393	Other
NCU01548	-0.0269991	1	0.964931	37.9675	38.2361	Other
NCU01549	0.0583566	1	0.980469	31.2155	29.4765	Other
NCU01550	-0.14296	1	0.767178	24.7672	26.8658	Other
NCU01551	-0.153814	1	0.73741	30.9919	33.8917	Other
NCU01552	0.00143308	1	1	33.6301	33.0269	Other
NCU01553	-0.104573	1	0.851541	33.2831	35.111	Other
NCU01554	-0.0711	1	0.955988	24.2378	25.0433	Other
NCU01555	0.0125426	1	1	34.358	33.5105	Other
NCU01559	0.170903	1	0.686423	30.5812	26.7982	Other
NCU01560	0.118046	1	0.846703	24.9544	22.6224	Other
NCU01561	0.235542	1	0.47228	37.1477	31.0241	Other
NCU01562	-0.0575209	1	0.914435	39.6819	40.6176	Other
NCU01563	0.0431091	1	0.980777	32.3785	30.8796	Other
NCU01564	-0.0609419	1	0.960578	30.2523	31.0446	Other
NCU01565	-0.0305752	1	1	30.6705	30.7755	Other
NCU01566	0.133678	1	0.713197	36.5537	32.7538	Other
NCU01567	-0.0319665	1	0.958472	27.2979	27.4088	Other
NCU01568	-0.0344043	1	1	27.6713	27.9027	Other
NCU01569	0.0327802	1	1	29.734	28.5645	Other
NCU01570	0.0813514	1	0.866848	33.0935	30.7616	Other
NCU01571	-0.0584469	1	0.90441	31.5405	32.3022	Other
NCU01572	0.123882	1	0.798953	29.6126	26.7235	Other
NCU01573	0.141139	1	0.795415	28.5983	25.5146	Other
NCU01575	-0.112585	1	0.847004	30.935	32.9441	Other
NCU01577	0.145354	1	0.659151	36.1086	32.1133	Other
NCU01579	-0.26319	1	0.422879	32.8944	38.6334	Other
NCU01580	-0.121821	1	0.78308	28.6964	30.6722	Other
NCU01581	-0.0585349	1	0.891972	24.7379	25.4082	Other
NCU01584	0.0573299	1	0.979067	27.2032	25.7232	Other
NCU01585	-0.286488	1	0.526675	22.5173	27.152	Other
NCU01587	-0.307914	1	0.428782	22.426	27.3227	Other
NCU01589	-0.0412618	1	0.957691	26.1558	26.4908	Other
NCU01591	0.0690113	1	0.913349	25.5801	23.989	Other
NCU01592	0.0355658	1	0.979804	29.0825	27.877	Other
NCU01593	0.339513	1	0.428907	31.4627	24.3344	Other
NCU01595	0.0633779	1	0.920868	30.887	29.1007	Other
NCU01596	0.10986	1	0.860259	30.1885	27.5154	Other
NCU01597	-0.0870686	1	0.830407	25.3845	26.5216	Other
NCU01598	0.00617934	1	1	33.4192	32.6876	Other
NCU01599	-0.0617509	1	0.896011	26.6948	27.4323	Other
NCU01601	-0.100735	1	0.839345	28.0656	29.5699	Other
NCU01605	-0.0770595	1	0.847004	31.4268	32.6049	Other
NCU01606	-0.107266	1	0.771479	25.946	27.4423	Other
NCU01607	0.0339672	1	1	28.8643	27.7058	Other
NCU01608	0.199894	1	0.570201	38.4969	32.8233	Other
NCU01610	-0.0433578	1	0.952997	20.9941	21.4118	Other
NCU01611	0.0847349	1	0.923371	32.7968	30.3999	Other
NCU01612	-0.301584	1	0.446523	24.9107	30.1695	Other
NCU01613	-0.0293928	1	1	32.528	32.6402	Other
NCU01614	-0.172563	1	0.62897	30.3124	33.6031	Other
NCU01615	0.027308	1	0.979445	28.0147	27.0478	Other
NCU01620	0.0765527	1	0.874339	37.0086	34.5232	Other
NCU01623	0.0275474	1	1	34.7479	33.5326	Other
NCU01625	0.116722	1	0.795415	28.7224	26.0385	Other
NCU01629	-0.0689737	1	0.908568	34.8476	35.9247	Other
NCU01631	-0.0623917	1	1	15.5048	15.9541	Other
NCU01632	-0.0112234	1	1	26.111	25.884	Other
NCU01633	0.103284	1	0.920868	30.7958	28.2314	Other
NCU01634	0.00985207	1	1	35.929	35.0786	Other
NCU01635	0.131502	1	0.805511	31.6047	28.4006	Other
NCU01636	-0.285215	1	0.37012	35.5568	42.6544	Other
NCU01637	-0.01828	1	1	29.2894	29.1431	Other
NCU01638	-0.0297567	1	1	25.9981	26.1103	Other
NCU01640	0.312563	1	0.30965	47.3034	37.4302	Other
NCU01642	-0.0285572	1	1	25.1036	25.1853	Other
NCU01643	-0.0764711	1	0.959211	28.0487	29.1044	Other
NCU01644	-0.0413175	1	0.958472	26.9349	27.2831	Other
NCU01645	-0.227287	1	0.576311	22.3305	25.721	Other
NCU01646	-0.0686646	1	0.957691	26.2019	27.068	Other
NCU01647	-0.111497	1	0.767178	24.7711	26.3273	Other
NCU01648	-0.200584	1	0.598567	25.2005	28.5033	Other
NCU01649	-0.125214	1	0.793077	31.6647	33.9358	Other
NCU01650	-0.220603	1	0.4978	31.6005	36.2751	Other
NCU01651	-0.136348	1	0.7899	30.6043	33.0999	Other
NCU01652	0.0534087	1	0.980777	31.9995	30.3306	Other
NCU01653	-0.171996	1	0.571854	37.2803	41.1961	Other
NCU01654	0.0135279	1	1	31.4836	30.6743	Other
NCU01655	-0.0998999	1	0.796114	32.8421	34.6372	Other
NCU01656	-0.0252009	1	1	31.9445	32.0041	Other
NCU01657	0.064591	1	0.872585	36.261	34.0763	Other
NCU01658	-0.0136915	1	1	28.656	28.4669	Other
NCU01659	0.00340698	1	1	27.5107	26.9913	Other
NCU01660	0.027969	1	1	33.4603	32.2385	Other
NCU01664	-0.201889	1	0.634263	30.9095	35.0457	Other
NCU01665	-0.0457648	1	0.961212	31.0066	31.4763	Other
NCU01666	-0.0225188	1	1	27.6077	27.6222	Other
NCU01667	-0.0819786	1	0.891972	24.5922	25.6273	Other
NCU01668	-0.0578864	1	0.849324	32.4934	33.2092	Other
NCU01669	0.0793252	1	0.860259	30.1618	28.0023	Other
NCU01670	-0.153147	1	0.71532	26.2196	28.7533	Other
NCU01672	0.12603	1	0.749969	32.0004	28.8119	Other
NCU01673	-0.249292	1	0.497205	25.0347	29.3143	Other
NCU01674	-0.147488	1	0.771479	25.8403	28.1408	Other
NCU01675	-0.0301051	1	0.959211	28.2311	28.376	Other
NCU01678	0.204615	1	0.559036	36.1912	30.8295	Other
NCU01679	0.246629	1	0.559036	36.4341	30.1861	Other
NCU01680	-0.0338828	1	1	23.84	24.0275	Other
NCU01681	0.12931	1	0.972773	16.2815	14.493	Other
NCU01684	-0.295778	1	0.563015	14.4081	17.4978	Other
NCU01686	-0.397871	1	0.462324	12.2182	15.6881	Other
NCU01688	0.0175194	1	0.983024	41.1071	39.8842	Other
NCU01689	-0.219233	1	0.564081	27.8372	31.8929	Other
NCU01692	-0.0774518	1	0.897868	27.5157	28.5515	Other
NCU01695	-0.0066037	1	1	35.4115	34.9495	Other
NCU01696	-0.0122352	1	1	35.3427	35.0335	Other
NCU01697	-0.051699	1	0.962393	33.4444	34.0442	Other
NCU01698	-0.168694	1	0.729207	28.956	31.9892	Other
NCU01699	-0.00699755	1	1	30.0197	29.6865	Other
NCU01700	0.122815	1	0.795415	28.7517	25.957	Other
NCU01701	-0.00834979	1	1	32.161	31.8099	Other
NCU01702	0.0748188	1	0.979445	28.1683	26.3106	Other
NCU01703	0.0300901	1	1	27.3995	26.4	Other
NCU01704	0.0634129	1	0.91952	29.8585	28.1109	Other
NCU01705	-0.018163	1	1	30.7262	30.6265	Other
NCU01706	-0.204693	1	0.588383	31.7273	35.8028	Other
NCU01713	0.133754	1	0.709208	35.9334	32.1321	Other
NCU01715	0.0708803	1	0.920868	30.8709	28.9192	Other
NCU01717	0.195266	1	0.575476	39.153	33.6016	Other
NCU01720	-0.022994	1	0.962945	34.2222	34.1901	Other
NCU01722	-0.0612333	1	0.958472	27.3513	28.0712	Other
NCU01724	-0.14166	1	0.710194	25.097	27.2635	Other
NCU01725	-0.197496	1	0.605243	26.0707	29.4303	Other
NCU01728	0.0859246	1	0.85528	28.0109	25.966	Other
NCU01729	-0.0443021	1	0.959211	28.2008	28.6375	Other
NCU01731	-0.0549774	1	0.894049	25.6692	26.2415	Other
NCU01734	0.117663	1	0.78774	26.4525	24.1717	Other
NCU01735	0.0753943	1	0.870756	35.1938	32.8388	Other
NCU01737	-0.04603	1	0.960578	30.3646	30.8057	Other
NCU01738	-0.17328	1	0.611598	27.4342	30.4222	Other
NCU01739	0.0904995	1	0.814247	34.7532	32.0627	Other
NCU01740	0.0380292	1	0.982812	40.3028	38.5805	Other
NCU01741	-0.0541543	1	0.897868	27.6697	28.2406	Other
NCU01742	-0.0308765	1	0.958472	27.4031	27.5292	Other
NCU01744	0.0530637	1	1	26.8664	25.4129	Other
NCU01745	0.0701822	1	0.92215	31.9459	29.8838	Other
NCU01746	-0.585274	1	0.129551	20.8734	30.9425	Other
NCU01747	0.103187	1	0.791683	27.5214	25.1641	Other
NCU01748	0.00286421	1	1	29.394	28.9103	Other
NCU01750	-0.608027	1	0.0910926	22.7686	34.0686	Other
NCU01751	0.0653275	1	0.982127	37.4512	35.1734	Other
NCU01752	-0.190696	1	0.62344	29.3848	32.9888	Other
NCU01753	0.071922	1	0.915024	26.8226	25.067	Other
NCU01754	0.0369173	1	0.977792	24.2608	23.2294	Other
NCU01756	-0.116099	1	0.733403	30.2786	32.3165	Other
NCU01757	-0.0969463	1	0.839345	28.4178	29.8786	Other
NCU01758	0.0843941	1	0.816907	35.7251	33.09	Other
NCU01759	0.0567206	1	0.982593	39.3991	37.187	Other
NCU01760	0.181192	1	0.610948	36.7092	31.7655	Other
NCU01761	-0.0108796	1	1	33.4924	33.1978	Other
NCU01762	-0.190547	1	0.634263	31.0387	34.7689	Other
NCU01763	-0.0865897	1	0.907243	33.5949	35.1129	Other
NCU01764	-0.0231449	1	0.965811	40.4761	40.3696	Other
NCU01765	0.0903785	1	0.918102	28.7309	26.5309	Other
NCU01766	-0.0835556	1	0.847004	31.3291	32.6294	Other
NCU01767	-0.0145604	1	1	30.3143	30.1447	Other
NCU01768	-0.220214	1	0.591542	23.9357	27.4614	Other
NCU01769	-0.302725	1	0.386985	27.449	33.3185	Other
NCU01771	-0.29746	1	0.454805	25.6424	31.099	Other
NCU01772	0.0582723	1	0.924537	33.851	31.9681	Other
NCU01776	0.00835924	1	1	30.6477	29.9802	Other
NCU01777	9.23386e-05	1	1	30.8261	30.3089	Other
NCU01779	-0.0763241	1	0.911056	36.7234	38.0197	Other
NCU01780	-0.170913	1	0.62344	29.2333	32.3688	Other
NCU01781	-0.029272	1	1	31.875	31.9408	Other
NCU01782	-0.137974	1	0.757793	22.7346	24.6313	Other
NCU01783	-0.296923	1	0.394686	28.905	34.8983	Other
NCU01784	-0.198577	1	0.570556	28.8925	32.5834	Other
NCU01785	-0.0279538	1	1	32.7604	32.8192	Other
NCU01786	-0.138789	1	0.7899	30.5507	33.1082	Other
NCU01788	-0.0841579	1	0.901301	29.6743	30.929	Other
NCU01789	-0.119357	1	0.823547	23.0436	24.6103	Other
NCU01790	-0.137622	1	0.741312	19.7918	21.4357	Other
NCU01791	0.0604649	1	0.980777	32.032	30.2055	Other
NCU01792	-0.127555	1	0.77555	26.3858	28.4866	Other
NCU01793	0.00738348	1	1	29.597	28.9405	Other
NCU01794	-0.217698	1	0.477629	35.1996	40.4049	Other
NCU01795	0.0470484	1	0.979804	29.1403	27.735	Other
NCU01796	-0.0225204	1	1	30.1753	30.1559	Other
NCU01797	0.00789532	1	1	26.1263	25.5785	Other
NCU01798	0.106558	1	0.773599	38.951	35.5983	Other
NCU01799	-0.256501	1	0.512353	27.0169	31.7988	Other
NCU01800	0.00600858	1	1	30.6601	30.0408	Other
NCU01801	-0.407289	1	0.220772	27.4701	35.7722	Other
NCU01802	0.105747	1	0.76754	37.2573	33.994	Other
NCU01803	-0.0812905	1	0.896011	26.5998	27.7057	Other
NCU01804	-0.0756014	1	0.902893	30.7898	31.9502	Other
NCU01805	-0.107733	1	0.741242	32.311	34.2754	Other
NCU01806	-0.307986	1	0.353224	28.309	34.5439	Other
NCU01807	-0.0675745	1	0.889768	23.7673	24.5147	Other
NCU01808	-0.230683	1	0.504951	26.1531	30.2196	Other
NCU01809	0.0128888	1	1	33.074	32.223	Other
NCU01810	0.120641	1	0.808558	32.8385	29.6297	Other
NCU01811	-0.175607	1	0.662013	26.5355	29.5109	Other
NCU01812	-0.104781	1	0.755047	36.2958	38.3896	Other
NCU01813	-0.0864227	1	0.842024	29.1962	30.4864	Other
NCU01814	-0.0688016	1	0.902893	30.5695	31.5917	Other
NCU01815	-0.273239	1	0.504951	26.0197	30.9902	Other
NCU01816	0.135662	1	0.745952	31.1262	27.8329	Other
NCU01817	-0.0117812	1	1	26.6332	26.3924	Other
NCU01818	0.0383454	1	1	36.9813	35.3807	Other
NCU01819	0.022531	1	0.98188	36.1954	34.9894	Other
NCU01820	-0.159987	1	0.767178	24.6179	27.0379	Other
NCU01821	-0.245072	1	0.557305	26.5862	31.0543	Other
NCU01822	-0.179198	1	0.71532	25.9842	28.9332	Other
NCU01823	-0.106821	1	0.830407	24.9108	26.3963	Other
NCU01824	-0.320216	1	0.389327	22.9483	28.2657	Other
NCU01826	-0.188779	1	0.672798	28.628	32.13	Other
NCU01827	0.011095	1	1	26.959	26.2682	Other
NCU01828	-0.0818143	1	0.909838	35.5427	37.0297	Other
NCU01829	-0.041733	1	0.917455	42.7868	43.4147	Other
NCU01830	0.329842	1	0.321092	43.8766	34.1726	Other
NCU01831	-0.0459999	1	0.907243	33.667	34.2075	Other
NCU01833	0.0624096	1	0.979067	26.9481	25.3952	Other
NCU01834	-0.31344	1	0.477731	17.6419	21.6056	Other
NCU01835	0.0989204	1	0.870756	35.0889	32.154	Other
NCU01837	0.376506	1	0.240392	40.6724	30.8863	Other
NCU01838	0.022365	1	1	32.3417	31.2996	Other
NCU01839	-0.125422	1	0.786572	29.5385	31.6617	Other
NCU01840	0.104991	1	0.916606	27.842	25.494	Other
NCU01841	-0.573469	1	0.0818855	25.9219	37.7118	Other
NCU01842	-0.165628	1	0.71532	26.0035	28.7421	Other
NCU01843	-0.0492677	1	1	25.5033	25.9484	Other
NCU01844	-0.122316	1	0.827079	24.3391	26.0787	Other
NCU01845	0.164552	1	0.791683	27.8293	24.4449	Other
NCU01846	-0.100504	1	0.884921	21.4191	22.6621	Other
NCU01848	0.314124	1	0.379392	30.5276	24.1579	Other
NCU01849	0.480083	1	0.149159	38.3052	26.9178	Other
NCU01850	0.0636423	1	0.91952	29.4424	27.7103	Other
NCU01851	0.089734	1	0.808558	32.6244	30.1369	Other
NCU01852	0.501957	1	0.115976	39.0562	27.1159	Other
NCU01853	0.169667	1	0.709208	36.0002	31.3764	Other
NCU01854	-0.124493	1	0.77555	26.5694	28.5023	Other
NCU01855	-0.105679	1	0.799022	33.6102	35.6859	Other
NCU01856	0.0547681	1	0.978666	25.9925	24.6123	Other
NCU01857	0.107113	1	0.802314	30.6333	27.9654	Other
NCU01858	-0.0255337	1	1	30.6243	30.6181	Other
NCU01859	0.170739	1	0.644288	32.9293	28.7659	Other
NCU01860	0.134028	1	0.720707	38.728	34.595	Other
NCU01861	-0.0148368	1	1	28.1128	27.9911	Other
NCU01862	-0.0200819	1	0.959912	29.3256	29.2095	Other
NCU01863	-0.428859	1	0.3216	13.7564	18.3262	Other
NCU01865	0.151442	1	0.7373	29.0909	25.7791	Other
NCU01866	0.0923039	1	0.808558	32.6537	30.0752	Other
NCU01867	0.446977	1	0.174935	38.9831	28.0706	Other
NCU01868	0.0278691	1	1	29.6477	28.5504	Other
NCU01869	0.0618955	1	0.981353	34.5418	32.4157	Other
NCU01870	-0.093178	1	0.849324	32.1047	33.6855	Other
NCU01871	-0.0320995	1	0.955988	24.3224	24.4808	Other
NCU01872	-0.181167	1	0.664394	18.2989	20.4255	Other
NCU01873	0.00456646	1	1	28.6914	28.1328	Other
NCU01874	0.046874	1	0.920868	30.5486	29.1477	Other
NCU01875	0.434042	1	0.198687	34.7409	25.1488	Other
NCU01876	-0.313768	1	0.343892	31.8819	38.9034	Other
NCU01877	0.320732	1	0.366005	39.8295	31.3093	Other
NCU01878	-0.0831684	1	0.957691	25.9408	27.0244	Other
NCU01879	-0.124528	1	0.83355	25.8974	27.8086	Other
NCU01880	0.00163348	1	1	45.8798	45.0897	Other
NCU01881	-0.100424	1	0.889768	23.7782	25.0697	Other
NCU01882	0.0081437	1	1	27.1641	26.5814	Other
NCU01883	0.0467505	1	1	26.9172	25.6136	Other
NCU01884	0.170214	1	0.654405	34.963	30.5599	Other
NCU01886	0.0178374	1	1	31.1172	30.2813	Other
NCU01888	0.0169187	1	1	32.7065	31.7611	Other
NCU01889	-0.268552	1	0.489087	24.0517	28.5326	Other
NCU01891	-0.323596	1	0.441723	19.2947	23.7156	Other
NCU01893	-0.191729	1	0.636805	22.8595	25.7006	Other
NCU01894	0.00188756	1	1	29.5239	29.0644	Other
NCU01895	0.0765203	1	0.918102	28.4411	26.5683	Other
NCU01896	0.153762	1	0.745952	31.0057	27.4351	Other
NCU01897	-0.0148704	1	1	26.232	26.0592	Other
NCU01898	-0.0183178	1	1	30.3926	30.3527	Other
NCU01899	0.0645333	1	0.982127	37.4185	35.1776	Other
NCU01900	-0.193297	1	0.672798	28.46	32.0218	Other
NCU01901	0.102797	1	0.860259	30.0764	27.5284	Other
NCU01902	-0.0563272	1	0.907243	33.6337	34.4592	Other
NCU01903	0.0185077	1	1	31.5685	30.6414	Other
NCU01904	-0.0560339	1	0.961816	32.0608	32.7697	Other
NCU01905	-0.0942742	1	0.844574	30.2478	31.7511	Other
NCU01906	-0.0686368	1	0.905858	32.5552	33.5382	Other
NCU01907	0.0446862	1	1	30.8563	29.4262	Other
NCU01908	-0.0312656	1	0.957691	26.3408	26.4843	Other
NCU01910	-0.00223117	1	1	29.9137	29.4535	Other
NCU01911	0.0392028	1	1	25.8144	24.7444	Other
NCU01912	-0.154842	1	0.767178	24.443	26.7758	Other
NCU01913	0.0340373	1	1	34.6083	33.1843	Other
NCU01914	0.0778051	1	0.91952	29.8933	27.7941	Other
NCU01916	0.0728137	1	0.862562	31.1014	29.1281	Other
NCU01917	0.125362	1	0.691189	44.3826	39.9033	Other
NCU01918	-0.0599955	1	0.960578	30.2276	30.931	Other
NCU01919	0.0254877	1	1	26.6798	25.7936	Other
NCU01920	-0.12224	1	0.78308	28.624	30.6388	Other
NCU01922	0.141292	1	0.727656	40.7118	36.3122	Other
NCU01923	-0.271019	1	0.563015	14.4964	17.3988	Other
NCU01924	0.00918961	1	1	28.5007	27.8691	Other
NCU01926	0.0403228	1	1	37.867	36.1185	Other
NCU01927	0.0797059	1	0.979445	28.1568	26.2334	Other
NCU01928	-0.0135445	1	1	27.0542	26.8862	Other
NCU01929	-0.0208174	1	1	27.9896	27.9563	Other
NCU01930	-0.115915	1	0.741242	32.4264	34.5402	Other
NCU01931	-0.0194518	1	1	27.6698	27.6067	Other
NCU01932	0.0751731	1	0.870756	35.0941	32.7157	Other
NCU01935	-0.135157	1	0.78308	28.9042	31.1468	Other
NCU01936	-0.0757612	1	0.836524	27.3796	28.3889	Other
NCU01938	-0.113379	1	0.724806	28.3494	30.1852	Other
NCU01939	-0.0188098	1	1	24.6604	24.6018	Other
NCU01940	0.0580503	1	0.915024	26.4876	25.0641	Other
NCU01942	-0.110796	1	0.946288	16.1789	17.2716	Other
NCU01943	0.155949	1	0.720707	38.7953	34.2623	Other
NCU01944	-0.0910355	1	0.897868	27.6992	29.0057	Other
NCU01945	-0.130227	1	0.7899	30.4373	32.806	Other
NCU01947	-0.110863	1	0.839345	28.0163	29.7391	Other
NCU01948	-0.1191	1	0.767178	24.666	26.4082	Other
NCU01949	-0.0711215	1	0.957691	26.2094	27.0634	Other
NCU01950	0.2219	1	0.600217	34.7457	29.3119	Other
NCU01951	0.277299	1	0.418552	35.6946	28.8997	Other
NCU01953	-0.0237609	1	1	25.9487	25.9613	Other
NCU01954	-0.1495	1	0.687201	31.5564	34.4529	Other
NCU01955	-0.0674681	1	0.958472	27.0334	27.9332	Other
NCU01956	0.0612039	1	0.915024	26.466	24.9646	Other
NCU01957	-0.276494	1	0.437859	23.917	28.4924	Other
NCU01961	0.20349	1	0.675684	28.5003	24.3415	Other
NCU01962	0.132777	1	0.7373	29.0065	26.1186	Other
NCU01963	0.140136	1	0.749969	32.307	28.7582	Other
NCU01964	-0.070813	1	0.894049	25.5191	26.3786	Other
NCU01965	-0.0220522	1	1	24.7474	24.7266	Other
NCU01966	-0.0737118	1	0.955055	23.0087	23.884	Other
NCU01967	-0.292235	1	0.480566	22.9693	27.7051	Other
NCU01968	-0.176954	1	0.611598	27.3254	30.3994	Other
NCU01969	-0.162988	1	0.729207	28.9932	31.9587	Other
NCU01970	-0.196854	1	0.576753	29.5725	33.3039	Other
NCU01971	-0.222139	1	0.550205	25.4806	29.1972	Other
NCU01972	-0.213271	1	0.4978	31.892	36.3104	Other
NCU01973	0.154203	1	0.659151	36.3143	32.0469	Other
NCU01974	-0.0215877	1	1	33.5681	33.5064	Other
NCU01975	-0.0662243	1	0.956865	25.3188	25.9983	Other
NCU01976	0.134728	1	0.749969	32.1372	28.7794	Other
NCU01977	-0.0405175	1	1	27.5386	27.8607	Other
NCU01978	0.0294611	1	1	36.6383	35.3304	Other
NCU01979	-0.0825932	1	0.849324	32.3958	33.7535	Other
NCU01980	-0.153473	1	0.733403	29.9328	32.7659	Other
NCU01981	-0.0345733	1	1	27.0026	27.1646	Other
NCU01982	-0.110841	1	0.73741	31.1947	33.1762	Other
NCU01983	-0.170463	1	0.662013	26.8683	29.7237	Other
NCU01984	0.0580308	1	0.979067	27.1648	25.6814	Other
NCU01985	-0.090739	1	0.83355	26.0251	27.2293	Other
NCU01987	0.00997037	1	1	32.8785	32.0644	Other
NCU01988	0.0931348	1	0.860259	30.271	27.8044	Other
NCU01989	0.0158437	1	1	31.8756	30.9897	Other
NCU01990	0.0426738	1	0.920868	30.5556	29.1586	Other
NCU01991	0.017801	1	1	30.175	29.2972	Other
NCU01992	-0.0555026	1	0.889768	23.7452	24.3187	Other
NCU01993	-0.111023	1	0.842024	28.9673	30.7866	Other
NCU01994	-0.146381	1	0.823547	23.1841	25.209	Other
NCU01995	0.0485607	1	0.927739	36.7567	34.8937	Other
NCU01996	0.127693	1	0.852583	27.3671	24.6428	Other
NCU01997	0.0644043	1	0.979445	28.0109	26.3738	Other
NCU01998	-0.133853	1	0.733403	30.3524	32.7854	Other
NCU01999	-0.11691	1	0.889768	23.4845	25.0475	Other
NCU02000	-0.021802	1	1	36.3295	36.4181	Other
NCU02001	-0.148559	1	0.699857	34.8236	37.9069	Other
NCU02002	-0.0807023	1	0.902893	30.9501	32.1516	Other
NCU02003	0.0566921	1	0.980777	32.1767	30.3916	Other
NCU02004	0.0665267	1	0.925651	34.6751	32.5385	Other
NCU02005	-0.19421	1	0.582689	30.6239	34.4471	Other
NCU02006	-0.0420449	1	1	28.83	29.1733	Other
NCU02007	-0.198033	1	0.546786	40.5288	45.863	Other
NCU02008	-0.229666	1	0.404314	42.0918	48.3138	Other
NCU02009	-0.095062	1	0.823547	23.2689	24.4778	Other
NCU02010	0.0776381	1	0.85528	28.0333	26.125	Other
NCU02011	-0.00215031	1	1	23.3582	23.0375	Other
NCU02012	-0.136196	1	0.77555	26.4831	28.6208	Other
NCU02013	0.0900365	1	0.979067	27.3071	25.2563	Other
NCU02014	-0.85493	1	0.0135373	19.2613	34.3631	Other
NCU02015	0.0119484	1	1	28.285	27.5631	Other
NCU02016	0.00274253	1	1	33.1601	32.5857	Other
NCU02017	-0.204267	1	0.650087	24.4648	27.7379	Other
NCU02018	0.0618621	1	0.920868	30.4943	28.7172	Other
NCU02019	0.0667895	1	0.979804	29.2141	27.4883	Other
NCU02020	0.155084	1	0.802314	30.846	27.239	Other
NCU02021	0.131065	1	0.814247	34.9464	31.2669	Other
NCU02022	0.171633	1	0.62086	38.9564	34.0191	Other
NCU02023	0.148238	1	0.757463	34.2333	30.2871	Other
NCU02024	-0.0165053	1	1	29.4342	29.29	Other
NCU02025	-0.041262	1	0.957691	25.9674	26.3328	Other
NCU02026	0.00626927	1	1	25.7787	25.2311	Other
NCU02027	-0.0710582	1	0.958472	26.8716	27.8138	Other
NCU02028	-0.02647	1	1	20.6451	20.6916	Other
NCU02029	0.217182	1	0.570201	38.3939	32.4852	Other
NCU02030	0.0756305	1	0.981072	33.5425	31.2224	Other
NCU02031	0.0633441	1	0.91952	29.7848	28.0013	Other
NCU02032	0.219929	1	0.546958	34.2589	28.8767	Other
NCU02033	-0.0114699	1	1	26.4422	26.215	Other
NCU02034	0.0874113	1	0.920868	30.6865	28.3257	Other
NCU02035	-0.0402781	1	1	39.5912	39.952	Other
NCU02036	0.153789	1	0.798953	29.8863	26.3746	Other
NCU02037	0.69414	1	0.0660527	32.5862	19.791	Other
NCU02038	0.188865	1	0.716964	24.8543	21.5246	Other
NCU02039	-0.00556725	1	1	27.0754	26.8015	Other
NCU02040	-0.152014	1	0.691596	32.6968	35.7128	Other
NCU02041	0.038121	1	1	30.7498	29.4418	Other
NCU02042	0.015681	1	1	29.6781	28.8738	Other
NCU02043	-0.052861	1	0.896011	26.7599	27.3696	Other
NCU02044	-0.142867	1	0.767178	24.662	26.7896	Other
NCU02046	-0.00474649	1	1	28.838	28.4396	Other
NCU02048	-0.0862002	1	0.955988	24.1073	25.1984	Other
NCU02049	-0.01944	1	1	25.2069	25.1134	Other
NCU02051	0.12521	1	0.795415	28.9254	26.0529	Other
NCU02052	0.0287721	1	1	27.4528	26.4537	Other
NCU02053	0.130559	1	0.749969	32.1126	28.8235	Other
NCU02054	-0.00324283	1	1	24.6054	24.28	Other
NCU02055	-0.200814	1	0.692978	22.2288	25.1119	Other
NCU02056	-0.11741	1	0.771479	25.619	27.3597	Other
NCU02057	0.00306911	1	1	26.0343	25.586	Other
NCU02058	-0.202722	1	0.636805	22.4827	25.4667	Other
NCU02059	-0.200486	1	0.643631	23.4704	26.5467	Other
NCU02060	-0.169315	1	0.650087	24.829	27.4652	Other
NCU02061	-0.217813	1	0.68652	21.0155	24.0757	Other
NCU02062	0.167679	1	0.62086	38.8191	33.874	Other
NCU02063	0.0595865	1	0.920868	30.7885	29.0036	Other
NCU02064	0.12978	1	0.846703	24.9673	22.4261	Other
NCU02065	0.0105604	1	1	23.7164	23.2056	Other
NCU02066	-0.0889378	1	0.90441	31.5531	32.9778	Other
NCU02067	-0.151731	1	0.757793	22.5162	24.629	Other
NCU02068	-0.0565926	1	0.954061	22.023	22.5495	Other
NCU02070	-0.0160754	1	1	24.4602	24.3456	Other
NCU02071	-0.411955	1	0.228179	28.0088	36.6609	Other
NCU02073	-0.407625	1	0.310672	23.0218	30.1538	Other
NCU02074	0.069185	1	0.979067	27.1164	25.4595	Other
NCU02075	-0.137504	1	0.823547	23.1162	25.0225	Other
NCU02076	-0.0264809	1	1	22.7224	22.7587	Other
NCU02077	-0.101692	1	0.755047	36.4618	38.4542	Other
NCU02078	-0.049007	1	0.956865	24.9068	25.3822	Other
NCU02079	0.254577	1	0.487878	32.725	26.967	Other
NCU02080	0.0769826	1	0.911571	24.6393	23.0209	Other
NCU02081	0.00566201	1	1	20.1769	19.5936	Other
NCU02082	0.0528924	1	0.918102	28.5631	27.064	Other
NCU02083	0.0809689	1	0.979445	28.3541	26.3456	Other
NCU02084	0.0774591	1	0.868846	34.0381	31.7179	Other
NCU02085	0.00742991	1	1	32.9594	32.1911	Other
NCU02086	-0.194299	1	0.656205	25.4732	28.6766	Other
NCU02087	0.316895	1	0.456338	28.8106	22.7223	Other
NCU02088	0.0638262	1	0.923371	32.8439	30.8166	Other
NCU02089	-0.0386547	1	1	23.456	23.702	Other
NCU02090	-0.0138078	1	1	24.9557	24.7868	Other
NCU02091	0.0298137	1	1	27.7009	26.6742	Other
NCU02092	-0.0839344	1	0.839345	28.018	29.2207	Other
NCU02094	0.014298	1	1	29.0112	28.2511	Other
NCU02095	-0.00810331	1	1	25.6187	25.4122	Other
NCU02096	-0.0544889	1	0.960578	30.2444	30.8486	Other
NCU02097	0.0231142	1	1	30.801	29.7749	Other
NCU02098	-0.121304	1	0.823547	23.4257	25.0076	Other
NCU02099	0.0199609	1	1	31.8618	30.9363	Other
NCU02100	-0.0783961	1	0.847004	31.0152	32.1539	Other
NCU02101	0.153045	1	0.760966	35.3402	31.2305	Other
NCU02103	0.0676602	1	0.977312	23.1735	21.7637	Other
NCU02104	0.158229	1	0.705048	34.7017	30.6013	Other
NCU02105	-0.177183	1	0.617656	28.4419	31.5745	Other
NCU02106	-0.337976	1	0.353068	23.7207	29.4482	Other
NCU02107	-0.155192	1	0.677817	29.8104	32.6334	Other
NCU02108	-0.379326	1	0.319819	24.0622	30.7895	Other
NCU02109	-0.0131516	1	1	30.4613	30.2857	Other
NCU02110	0.0238732	1	0.980145	29.9955	29.0241	Other
NCU02111	0.0456623	1	1	25.673	24.4559	Other
NCU02112	0.0680355	1	0.920868	30.8331	28.916	Other
NCU02113	-0.042907	1	1	23.7926	24.1266	Other
NCU02114	-0.086722	1	0.83355	26.0412	27.2189	Other
NCU02115	0.0868432	1	0.916606	27.5631	25.5176	Other
NCU02116	-0.23243	1	0.538974	31.1505	35.9282	Other
NCU02117	-0.0811806	1	0.887422	22.8815	23.7816	Other
NCU02118	0.0190504	1	1	25.6166	24.9185	Other
NCU02119	-0.0596737	1	0.899629	28.7396	29.4588	Other
NCU02120	0.0572201	1	0.978242	25.3232	23.9441	Other
NCU02121	0.0658078	1	0.916606	27.4763	25.8404	Other
NCU02122	-0.16662	1	0.62344	29.3048	32.4208	Other
NCU02123	0.149138	1	0.691408	31.3383	27.8488	Other
NCU02124	-0.199003	1	0.656205	25.5392	28.8305	Other
NCU02125	-0.077077	1	0.90441	31.9252	33.1015	Other
NCU02126	-0.0898767	1	0.901301	29.453	30.8439	Other
NCU02127	0.125826	1	0.745952	31.0439	27.928	Other
NCU02128	-0.0155834	1	1	30.0529	29.8798	Other
NCU02129	-0.425376	1	0.440018	14.4854	19.3023	Other
NCU02130	0.0583116	1	0.925651	34.7739	32.8201	Other
NCU02131	0.0777437	1	0.852583	26.9104	25.0781	Other
NCU02132	-0.434849	1	0.312278	16.1454	21.5641	Other
NCU02133	-0.240499	1	0.550205	25.6072	29.7833	Other
NCU02134	-0.19437	1	0.68652	20.8835	23.5323	Other
NCU02136	-0.0580595	1	0.894049	25.7195	26.4049	Other
NCU02137	0.0689694	1	0.979804	29.2548	27.4701	Other
NCU02138	-0.202273	1	0.605243	26.2002	29.6854	Other
NCU02139	0.0246642	1	1	27.1823	26.2932	Other
NCU02142	-0.136357	1	0.779412	27.5227	29.7022	Other
NCU02143	-0.377481	1	0.45347	15.388	19.8029	Other
NCU02144	-0.555375	1	0.220197	17.453	25.2456	Other
NCU02145	-0.24869	1	0.664394	17.7782	20.9129	Other
NCU02146	0.106712	1	0.870756	35.5803	32.392	Other
NCU02147	0.0122818	1	1	29.3294	28.5292	Other
NCU02148	-0.105491	1	0.896011	26.5276	28.1354	Other
NCU02149	-0.160603	1	0.733403	30.1426	33.0715	Other
NCU02150	-0.0201883	1	0.961212	31.3155	31.2334	Other
NCU02151	-0.0504622	1	0.961212	31.3344	31.9198	Other
NCU02152	0.0758331	1	0.92215	31.9252	29.7678	Other
NCU02153	-0.0821222	1	0.891972	24.7672	25.8124	Other
NCU02155	0.0524664	1	0.979804	28.9713	27.4587	Other
NCU02156	-0.0263452	1	1	26.6981	26.808	Other
NCU02157	0.0401857	1	1	27.8802	26.6065	Other
NCU02158	-0.051137	1	0.961212	31.2769	31.8528	Other
NCU02159	-0.15282	1	0.71532	26.2855	28.7373	Other
NCU02160	-0.262677	1	0.526675	22.7764	26.9403	Other
NCU02161	-0.0668527	1	1	24.4098	25.1998	Other
NCU02162	-0.113638	1	0.771479	25.7553	27.4257	Other
NCU02163	-0.449688	1	0.225781	20.9399	28.244	Other
NCU02164	-0.193618	1	0.650087	24.8771	27.976	Other
NCU02165	0.297582	1	0.456338	28.6623	22.8628	Other
NCU02167	-0.0963241	1	0.884921	21.5111	22.6232	Other
NCU02168	0.07279	1	0.920868	30.8801	28.8704	Other
NCU02169	-0.0992275	1	0.849324	31.9293	33.7095	Other
NCU02170	0.236396	1	0.533836	32.0545	26.734	Other
NCU02171	-0.155216	1	0.790757	15.9979	17.5593	Other
NCU02172	-0.101784	1	0.779412	27.8378	29.3624	Other
NCU02173	0.00716474	1	1	25.5026	24.9439	Other
NCU02174	-0.319435	1	0.428782	22.828	28.054	Other
NCU02175	0.0483856	1	0.979804	29.2891	27.827	Other
NCU02176	-0.0681072	1	0.894049	25.7755	26.6117	Other
NCU02177	0.0497379	1	0.979804	29.1446	27.6547	Other
NCU02178	0.133302	1	0.808558	32.6229	29.2317	Other
NCU02179	0.163628	1	0.691408	31.758	27.838	Other
NCU02181	-0.0623518	1	0.902893	30.8409	31.6671	Other
NCU02182	-0.0616054	1	0.956865	25.0044	25.6655	Other
NCU02183	-0.2776	1	0.614145	13.191	15.7204	Other
NCU02184	0.108122	1	0.802314	30.6737	27.9564	Other
NCU02187	-0.0357472	1	0.956865	25.0602	25.2575	Other
NCU02188	0.0825554	1	0.923371	32.6689	30.2518	Other
NCU02189	0.336196	1	0.428907	31.241	24.3773	Other
NCU02190	0.0562723	1	0.980777	31.9996	30.3423	Other
NCU02191	0.0736477	1	0.92215	31.6543	29.5771	Other
NCU02192	-0.150769	1	0.682613	30.7887	33.6513	Other
NCU02193	-0.0269714	1	0.958472	27.0672	27.2506	Other
NCU02194	0.0735257	1	0.980469	31.2996	29.2343	Other
NCU02195	0.131895	1	0.798953	29.7715	26.6994	Other
NCU02196	0.199058	1	0.559036	36.3267	31.117	Other
NCU02197	-0.0152289	1	1	28.7714	28.427	Other
NCU02198	0.160436	1	0.745952	31.1045	27.2448	Other
NCU02199	0.218491	1	0.559036	36.5683	30.7455	Other
NCU02200	-0.0521648	1	0.961816	32.1608	32.7456	Other
NCU02201	0.0942359	1	0.862562	31.135	28.6941	Other
NCU02202	0.0108605	1	1	25.4818	24.8578	Other
NCU02203	0.101605	1	0.916606	27.7992	25.4359	Other
NCU02204	-0.0507268	1	0.959211	27.9616	28.4787	Other
NCU02205	-0.00609373	1	1	41.1289	40.5699	Other
NCU02206	-0.00228253	1	1	37.459	36.9418	Other
NCU02207	-0.179291	1	0.710194	25.2878	28.15	Other
NCU02208	0.0457661	1	1	24.6808	23.5545	Other
NCU02209	-0.000414367	1	1	28.296	27.8641	Other
NCU02211	-0.131291	1	0.710194	25.2222	27.2542	Other
NCU02212	0.0275814	1	1	29.4899	28.5015	Other
NCU02213	0.12436	1	0.819456	36.9012	33.2547	Other
NCU02214	0.185455	1	0.741734	30.3857	26.2268	Other
NCU02215	0.108533	1	0.816907	35.6651	32.5291	Other
NCU02216	-0.0359949	1	0.959211	28.3588	28.5475	Other
NCU02217	-0.0990818	1	0.80952	37.8371	39.6915	Other
NCU02218	0.0869588	1	0.979445	28.3614	26.2658	Other
NCU02219	-0.00967598	1	1	27.0769	26.8213	Other
NCU02220	-0.149844	1	0.692978	22.402	24.3954	Other
NCU02221	-0.0253521	1	1	25.7281	25.7766	Other
NCU02222	-0.0983967	1	0.786572	29.8305	31.4176	Other
NCU02223	0.119349	1	0.795415	28.8902	26.1174	Other
NCU02224	0.0458272	1	1	26.5069	25.2775	Other
NCU02225	0.0201211	1	1	29.3211	28.3943	Other
NCU02226	0.0114198	1	1	34.217	33.2951	Other
NCU02227	-0.0929938	1	0.83355	26.0848	27.4506	Other
NCU02228	-0.121973	1	0.83355	26.1892	28.0164	Other
NCU02229	-0.117653	1	0.779412	27.7732	29.6271	Other
NCU02230	0.116278	1	0.808558	32.4912	29.4541	Other
NCU02231	-0.0232899	1	1	27.1257	27.1303	Other
NCU02232	-0.1216	1	0.779412	27.6893	29.653	Other
NCU02233	-0.0444839	1	0.958472	27.0579	27.4474	Other
NCU02234	-0.0318397	1	0.954061	22.2543	22.4044	Other
NCU02235	-0.0995605	1	0.896011	26.6387	28.1177	Other
NCU02236	-0.11647	1	0.779412	27.6115	29.4315	Other
NCU02237	0.178346	1	0.633228	31.0791	26.9955	Other
NCU02238	0.354251	1	0.420604	30.3132	23.2823	Other
NCU02239	0.030548	1	1	34.7925	33.492	Other
NCU02240	0.198572	1	0.564725	37.2327	31.8806	Other
NCU02241	-0.0764295	1	0.849324	32.0129	33.1984	Other
NCU02242	-0.0421634	1	0.908568	34.8487	35.3254	Other
NCU02243	0.143503	1	0.724247	39.6586	35.2832	Other
NCU02244	0.0867384	1	0.872585	36.0764	33.4208	Other
NCU02245	-0.0462731	1	0.956865	25.3336	25.7174	Other
NCU02246	-0.125286	1	0.77555	26.7607	28.7294	Other
NCU02247	-0.0582174	1	0.959912	29.0676	29.7699	Other
NCU02248	-0.0192022	1	1	27.7375	27.6976	Other
NCU02249	-0.0912478	1	0.827079	24.2416	25.4053	Other
NCU02250	-0.156726	1	0.771479	25.4255	27.9421	Other
NCU02251	0.131089	1	0.832465	20.7832	18.7016	Other
NCU02252	-0.047097	1	1	26.6963	27.0902	Other
NCU02253	-0.270371	1	0.508786	20.5464	24.3931	Other
NCU02254	0.0403738	1	1	32.6447	31.1933	Other
NCU02255	0.0477528	1	0.979445	28.1797	26.8261	Other
NCU02256	-0.113695	1	0.896011	26.4325	28.1186	Other
NCU02257	0.0437885	1	1	25.5192	24.301	Other
NCU02258	-0.105533	1	0.882245	20.5579	21.7715	Other
NCU02259	0.270439	1	0.42593	43.1364	35.1331	Other
NCU02260	-0.143546	1	0.667536	27.8729	30.2516	Other
NCU02261	-0.215203	1	0.605243	25.9791	29.6857	Other
[truncated: 7,731 more rows]

## Sheet: iswi
genes	logFC	FDR	Pvalue	iswi	wt	category
NCU02037	1.07105	1	0.00206987	44.006	19.791	Up
NCU05472	1.14794	1	0.000965479	43.1057	18.421	Up
NCU05504	1.16092	1	0.00061832	45.9063	19.3975	Up
NCU05678	1.21028	0.777987	0.00031983	48.6491	19.8148	Up
NCU07105	1.09366	1	0.00206987	44.4451	19.6963	Up
NCU07106	1.18502	0.640681	0.000131692	53.7556	22.3081	Up
NCU08246	1.12762	1	0.00142978	44.034	18.9716	Up
NCU09455	1.17782	1	0.00124105	39.3612	16.4552	Up
NCU09950	1.1384	1	0.000965479	43.7933	18.5384	Up
NCU00645	-1.40998	0.641041	0.000197649	13.387	34.0359	Down
NCU02143	-1.09741	1	0.0309942	9.91841	19.8029	Down
NCU03467	-1.18677	1	0.00361767	13.9603	30.5308	Down
NCU03875	-2.36087	0.0186636	1.91815e-06	5.25333	26.1453	Down
NCU04283	-1.15521	1	0.00280071	15.2616	32.5403	Down
NCU04284	-1.23217	1	0.0078327	11.023	24.7898	Down
NCU04875	-1.08272	1	0.00711291	14.9054	30.6048	Down
NCU04879	-1.16521	1	0.00411274	13.9309	29.499	Down
NCU05163	-1.06668	1	0.020605	11.0555	22.1731	Down
NCU05171	-1.20022	1	0.00467645	13.0463	28.625	Down
NCU05911	-1.27032	1	0.000902569	14.1136	32.3197	Down
NCU05947	-1.33554	1	0.000596012	13.3052	32.145	Down
NCU06096	-1.11271	1	0.00531847	13.1551	26.8118	Down
NCU06849	-1.03449	1	0.00480646	16.9574	33.3136	Down
NCU07140	-1.05634	1	0.00623959	15.9485	31.5424	Down
NCU07744	-1.23404	1	0.00471245	11.3116	25.4623	Down
NCU07750	-1.00928	1	0.0189281	13.1167	25.1318	Down
NCU08015	-1.00668	1	0.0428837	10.0263	19.7079	Down
NCU08043	-1.06464	1	0.0081115	14.6851	29.3984	Down
NCU08105	-1.16667	1	0.00361767	14.1118	30.1048	Down
NCU09145	-1.11692	1	0.035567	8.88064	18.4711	Down
NCU09289	-1.05858	1	0.0408504	8.78443	17.3934	Down
NCU12045	-1.03322	1	0.0180073	11.6568	23.1074	Down
NCU16616	-1.03293	1	0.0081115	14.6822	29.0862	Down
NCU16738	-1.3987	1	0.00104985	10.8494	27.3361	Down
NCU00003	0.0967129	1	0.824251	39.2681	34.7827	Other
NCU00004	-0.167932	1	0.667536	28.1966	30.0334	Other
NCU00005	0.0684588	1	0.981353	34.7769	31.446	Other
NCU00006	-0.0802287	1	0.958472	27.4068	27.5019	Other
NCU00007	0.030654	1	0.979067	27.5463	25.5213	Other
NCU00008	-0.0369166	1	0.959912	29.3326	28.5466	Other
NCU00009	-0.253419	1	0.435602	34.8879	39.9065	Other
NCU00010	0.00925221	1	1	28.0343	26.3932	Other
NCU00011	0.00753417	1	1	13.7549	13.1472	Other
NCU00013	0.0773109	1	0.92215	32.5172	29.0088	Other
NCU00014	0.137806	1	0.802314	31.2359	26.9311	Other
NCU00015	-0.077829	1	0.954061	22.6101	22.6439	Other
NCU00017	0.196342	1	0.594508	34.3642	28.3382	Other
NCU00018	-0.0628566	1	0.956865	25.3923	25.1952	Other
NCU00019	-0.0537325	1	1	27.8268	27.4456	Other
NCU00021	-0.150543	1	0.704781	24.5321	25.8223	Other
NCU00022	0.278495	1	0.47228	37.9547	29.6063	Other
NCU00023	-0.0832551	1	0.896011	27.1992	27.2805	Other
NCU00024	-0.143452	1	0.827079	24.2882	25.4916	Other
NCU00025	-0.0137489	1	1	30.6317	29.3191	Other
NCU00026	-0.22292	1	0.591542	24.1984	26.8087	Other
NCU00027	0.036683	1	0.980469	31.7693	29.3815	Other
NCU00028	-0.0798014	1	0.901301	30.1618	30.2281	Other
NCU00029	-0.139977	1	0.73741	31.3519	32.7886	Other
NCU00030	0.111893	1	0.864756	32.3865	28.4922	Other
NCU00031	-0.370836	1	0.249343	31.7012	38.8145	Other
NCU00032	0.0692384	1	0.981622	35.8167	32.3332	Other
NCU00033	-0.705531	1	0.0673203	18.9367	29.2731	Other
NCU00034	-0.221336	1	0.544979	32.6715	36.1755	Other
NCU00035	0.065878	1	0.920868	31.1798	28.2737	Other
NCU00037	0.144113	1	0.802314	31.3708	26.8541	Other
NCU00038	0.212325	1	0.559036	36.4247	29.7437	Other
NCU00039	0.213459	1	0.570201	38.9859	31.7985	Other
NCU00040	-0.00528782	1	1	22.1793	21.1062	Other
NCU00041	-0.174804	1	0.704781	24.3296	26.1064	Other
NCU00042	-0.323567	1	0.337123	26.6657	31.6927	Other
NCU00043	-0.0130505	1	1	28.0376	26.8209	Other
NCU00045	0.0590104	1	0.920868	31.0883	28.2796	Other
NCU00046	-0.127061	1	0.83355	26.3619	27.3073	Other
NCU00047	-0.213402	1	0.636813	15.5392	17.0162	Other
NCU00048	-0.486686	1	0.305773	12.8866	17.0758	Other
NCU00050	0.0126933	1	1	32.9075	30.951	Other
NCU00051	-0.00270446	1	1	30.8896	29.3667	Other
NCU00052	0.459032	1	0.187502	41.375	28.4499	Other
NCU00054	0.479935	1	0.181274	40.4113	27.3829	Other
NCU00055	0.280887	1	0.458922	35.7494	27.8213	Other
NCU00056	0.125711	1	0.816907	36.4677	31.6168	Other
NCU00057	0.327803	1	0.365671	34.8906	26.1895	Other
NCU00059	0.12978	1	0.753802	33.5081	29.018	Other
NCU00060	0.0680817	1	0.862562	31.3877	28.4152	Other
NCU00061	0.0718256	1	0.928719	38.2029	34.3699	Other
NCU00064	-0.0315005	1	0.957691	26.6571	25.8534	Other
NCU00065	0.213635	1	0.681189	30.1591	24.6223	Other
NCU00066	0.0279855	1	0.979445	28.2575	26.2928	Other
NCU00067	-0.173858	1	0.656205	26.1145	27.9463	Other
NCU00068	-0.0257904	1	1	25.7524	24.8451	Other
NCU00069	-0.510452	1	0.305773	12.6495	17.0278	Other
NCU00070	0.0776953	1	0.92215	32.1964	28.9171	Other
NCU00071	-0.0520008	1	1	33.0826	32.304	Other
NCU00072	-0.0870568	1	0.90441	32.0116	32.1566	Other
NCU00073	0.0517109	1	1	22.9431	21.0227	Other
NCU00074	-0.197458	1	0.62344	29.4883	32.0132	Other
NCU00075	-0.151048	1	0.639336	32.8878	34.5576	Other
NCU00076	0.12041	1	0.76754	37.4108	32.6552	Other
NCU00077	0.0672159	1	0.980777	32.7366	29.5633	Other
NCU00078	-0.172506	1	0.648882	34.6767	36.9757	Other
NCU00079	-0.18706	1	0.599108	34.1193	36.7992	Other
NCU00080	-0.113224	1	0.801808	35.1963	36.1359	Other
NCU00081	0.150873	1	0.696163	33.1808	28.3137	Other
NCU00082	-0.295976	1	0.563015	14.7575	17.3527	Other
NCU00083	-0.239087	1	0.557305	26.9805	30.1592	Other
NCU00084	-0.2899	1	0.360863	29.8582	34.5299	Other
NCU00085	-0.195118	1	0.550757	33.4691	36.2816	Other
NCU00086	-0.359759	1	0.226757	32.3198	39.4298	Other
NCU00087	0.020751	1	1	30.2269	28.1642	Other
NCU00088	-0.148823	1	0.771479	26.0666	27.3789	Other
NCU00089	-0.197051	1	0.557305	27.2368	29.6076	Other
NCU00090	-0.0239249	1	1	31.9128	30.7271	Other
NCU00091	0.273862	1	0.49495	34.1086	26.7126	Other
NCU00092	0.0276777	1	1	35.0578	32.6889	Other
NCU00093	0.247325	1	0.53203	40.7483	32.3128	Other
NCU00095	0.0274232	1	0.979445	28.445	26.4875	Other
NCU00096	0.421123	1	0.233829	40.4234	28.5611	Other
NCU00097	0.153616	1	0.713197	37.1618	31.6509	Other
NCU00099	-0.605577	1	0.145401	18.3022	26.2799	Other
NCU00100	0.10812	1	0.864756	32.4019	28.4998	Other
NCU00101	-0.279804	1	0.497205	25.6354	29.4414	Other
NCU00102	-0.140836	1	0.672798	29.1595	30.4616	Other
NCU00103	0.169554	1	0.7373	29.6261	25.0339	Other
NCU00104	-0.114726	1	0.767178	25.1352	25.8413	Other
NCU00105	-0.00799258	1	1	37.2857	35.4984	Other
NCU00106	0.0689614	1	0.979804	29.4705	26.6485	Other
NCU00107	0.103084	1	0.814247	35.5728	31.2509	Other
NCU00108	0.0185874	1	1	31.0888	29.1136	Other
NCU00109	0.231211	1	0.501739	34.9539	28.2122	Other
NCU00110	0.24208	1	0.458922	35.4442	28.3665	Other
NCU00111	-0.191701	1	0.634263	31.4838	34.1203	Other
NCU00112	0.0879895	1	0.864756	32.5055	28.9478	Other
NCU00114	-0.00547097	1	1	30.5708	29.1214	Other
NCU00115	-0.0694141	1	0.908568	35.2101	34.9607	Other
NCU00116	-0.164893	1	0.71532	26.2149	27.9143	Other
NCU00117	0.145976	1	0.749969	32.2544	27.6484	Other
NCU00118	0.259343	1	0.438829	39.1301	30.9585	Other
NCU00119	0.156934	1	0.753802	33.7621	28.6962	Other
NCU00120	0.193215	1	0.649456	34.7419	28.7878	Other
NCU00121	0.143893	1	0.798953	29.8374	25.6039	Other
NCU00122	-0.0844422	1	0.901301	30.0801	30.2122	Other
NCU00123	-0.663178	1	0.218873	10.2135	15.4051	Other
NCU00124	-0.0468049	1	1	26.0151	25.5002	Other
NCU00125	0.0215322	1	1	35.1766	32.7915	Other
NCU00126	-0.0556903	1	0.897868	28.0079	27.5894	Other
NCU00127	-0.00509722	1	1	30.4404	28.8943	Other
NCU00128	0.495624	1	0.137477	40.3347	27.0309	Other
NCU00129	0.0831372	1	0.821902	38.0337	34.0016	Other
NCU00130	-0.136362	1	0.691596	33.0333	34.3954	Other
NCU00132	-0.229391	1	0.484605	30.2833	33.6575	Other
NCU00133	-0.0642829	1	0.901301	29.9915	29.6784	Other
NCU00134	0.0667549	1	0.920868	30.8649	27.9215	Other
NCU00135	-0.120089	1	0.779412	28.2107	29.1032	Other
NCU00136	0.0849191	1	0.925651	35.1053	31.4186	Other
NCU00137	-0.023732	1	1	35.3491	33.9675	Other
NCU00138	0.0211186	1	1	32.4388	30.1851	Other
NCU00142	0.0743018	1	0.860259	30.5322	27.4686	Other
NCU00143	-0.480932	1	0.202159	21.9699	28.8705	Other
NCU00144	-0.34842	1	0.398408	24.3059	29.3796	Other
NCU00145	-0.201722	1	0.662013	26.847	29.2698	Other
NCU00146	-0.195399	1	0.617656	28.7062	31.1171	Other
NCU00147	-0.333108	1	0.314267	27.8636	33.4279	Other
NCU00148	0.141509	1	0.757463	34.5216	29.6654	Other
NCU00149	0.050426	1	0.933864	44.2298	40.4202	Other
NCU00150	-0.136461	1	0.73741	31.612	32.9116	Other
NCU00151	-0.0279608	1	1	34.3525	33.2039	Other
NCU00152	-0.0358757	1	1	23.7681	23.1229	Other
NCU00153	-0.177937	1	0.704781	24.2107	26.0056	Other
NCU00154	-0.0415469	1	0.899629	29.2286	28.5023	Other
NCU00155	0.014385	1	1	27.33	25.6255	Other
NCU00157	-0.0538804	1	0.958472	27.4934	27.1039	Other
NCU00158	0.211639	1	0.638884	32.6525	26.6162	Other
NCU00159	0.053221	1	0.978242	25.5229	23.2805	Other
NCU00160	-0.177164	1	0.62897	30.4425	32.641	Other
NCU00161	-0.0277415	1	0.961212	31.8189	30.7444	Other
NCU00162	-0.168164	1	0.611598	27.7412	29.5447	Other
NCU00163	-0.204249	1	0.504032	33.3466	36.44	Other
NCU00164	-0.175166	1	0.68652	21.3718	22.9098	Other
NCU00166	-0.290302	1	0.470325	27.8126	32.3128	Other
NCU00167	-0.0363164	1	1	29.2356	28.4046	Other
NCU00168	-0.203006	1	0.62344	29.5857	32.2499	Other
NCU00169	0.0971299	1	0.802314	30.817	27.3331	Other
NCU00170	0.0303423	1	1	25.6475	23.8663	Other
NCU00171	-0.368528	1	0.333947	22.0138	26.9977	Other
NCU00172	0.0252604	1	1	30.0836	28.0614	Other
NCU00173	-0.0561359	1	1	28.836	28.4618	Other
NCU00175	-0.260975	1	0.484605	30.0822	34.1575	Other
NCU00176	-0.599631	1	0.0910926	22.7904	32.892	Other
NCU00177	0.0724837	1	0.916606	27.9988	25.2515	Other
NCU00178	-0.139753	1	0.724806	28.4006	29.6912	Other
NCU00179	-0.955191	1	0.00698141	20.4789	37.3246	Other
NCU00180	-0.259784	1	0.504951	26.2573	29.8433	Other
NCU00181	0.138523	1	0.760966	35.5323	30.6108	Other
NCU00182	-0.133273	1	0.71532	26.7182	27.7944	Other
NCU00183	-0.195512	1	0.667536	27.8287	30.2456	Other
NCU00184	0.161408	1	0.686423	31.1946	26.4287	Other
NCU00185	0.128414	1	0.821902	38.5831	33.3077	Other
NCU00186	-0.296922	1	0.446523	24.9598	29.0854	Other
NCU00187	-0.0189844	1	1	30.074	28.8557	Other
NCU00188	-0.00878277	1	1	28.1282	26.8656	Other
NCU00189	-0.251554	1	0.844926	11.3995	12.9678	Other
NCU00192	0.448289	1	0.251334	34.1364	23.6275	Other
NCU00193	-0.0187775	1	1	35.5513	34.0746	Other
NCU00194	-0.140439	1	0.83355	26.3407	27.495	Other
NCU00195	-0.306326	1	0.378992	27.2898	31.9448	Other
NCU00196	-0.0363706	1	0.958472	27.6102	26.8447	Other
NCU00197	-0.39844	1	0.550266	13.5373	16.9079	Other
NCU00198	-0.423483	1	0.235163	22.8902	28.8389	Other
NCU00199	0.0510784	1	1	31.1957	28.5592	Other
NCU00200	0.105712	1	0.749969	32.2816	28.4433	Other
NCU00201	0.184406	1	0.705048	35.3956	29.5044	Other
NCU00202	0.142966	1	0.741734	30.5746	26.2182	Other
NCU00203	0.141785	1	0.724247	39.9596	34.4462	Other
NCU00204	0.089547	1	0.874339	37.8128	33.7236	Other
NCU00205	0.0967513	1	0.798953	29.8692	26.4928	Other
NCU00206	0.423928	1	0.193619	42.0453	29.673	Other
NCU00207	0.090782	1	0.870756	35.4505	31.5719	Other
NCU00208	0.38386	1	0.222244	43.0635	31.1814	Other
NCU00209	-0.0322842	1	1	30.8487	29.9337	Other
NCU00210	-0.192728	1	0.667536	27.8757	30.3616	Other
NCU00211	-0.254045	1	0.416193	32.2766	36.4275	Other
NCU00212	-0.152328	1	0.823547	23.2911	24.6081	Other
NCU00213	-0.0510688	1	0.959912	29.2899	28.7906	Other
NCU00214	-0.148963	1	0.724806	28.7529	30.2047	Other
NCU00215	-0.0420462	1	1	26.0422	25.4679	Other
NCU00216	-0.0299225	1	0.959211	28.6853	27.7757	Other
NCU00218	-0.510739	1	0.193027	20.7532	28.0031	Other
NCU00219	-0.00511583	1	1	24.6354	23.436	Other
NCU00220	-0.15134	1	0.724806	28.3149	29.8092	Other
NCU00221	0.0499299	1	0.982127	37.9351	34.7088	Other
NCU00222	0.0551309	1	1	29.0242	26.5552	Other
NCU00223	-0.0856284	1	0.83355	26.4382	26.6491	Other
NCU00224	0.676347	1	0.056108	38.3195	22.8319	Other
NCU00225	-0.030068	1	1	26.7297	25.9098	Other
NCU00226	0.151275	1	0.705048	35.1235	29.9321	Other
NCU00227	0.0106006	1	1	30.9296	29.0713	Other
NCU00229	-0.453399	1	0.3216	13.8333	18.098	Other
NCU00230	-0.159859	1	0.720183	27.4585	29.1132	Other
NCU00231	-0.0855179	1	0.804482	36.224	36.3993	Other
NCU00232	0.32528	1	0.411299	35.1626	26.6084	Other
NCU00233	-0.022151	1	1	30.8894	29.7541	Other
NCU00234	-0.00735781	1	1	25.6044	24.3969	Other
NCU00236	-0.216299	1	0.52622	29.3963	32.4593	Other
NCU00237	0.0831778	1	0.979445	28.6882	25.6407	Other
NCU00238	-0.0497794	1	0.964464	37.8659	37.17	Other
NCU00239	-0.0318636	1	1	27.9733	27.0825	Other
NCU00240	-0.152831	1	0.729207	29.6178	31.2537	Other
NCU00241	-0.0562722	1	0.956865	25.6267	25.2226	Other
NCU00242	-0.150233	1	0.757793	22.97	24.1497	Other
NCU00243	-0.155141	1	0.815781	21.2691	22.4777	Other
NCU00244	-0.600156	1	0.12881	19.0944	27.3809	Other
NCU00245	-0.379279	1	0.297962	25.9948	31.9848	Other
NCU00246	-0.236572	1	0.52622	29.7567	33.1737	Other
NCU00247	-0.500321	1	0.2061	19.2819	25.9846	Other
NCU00248	-0.287281	1	0.595623	17.8955	20.708	Other
NCU00249	-0.113928	1	0.729207	29.8032	30.4988	Other
NCU00250	-0.310614	1	0.345315	27.6455	32.4704	Other
NCU00251	0.0669019	1	0.860259	30.3856	27.4868	Other
NCU00252	0.109012	1	0.77063	38.6181	33.9099	Other
NCU00253	-0.00598096	1	1	32.6399	31.0865	Other
NCU00254	0.383614	1	0.361428	28.8849	20.9501	Other
NCU00257	0.0860315	1	0.864756	32.5106	29.0853	Other
NCU00258	0.118802	1	0.802314	31.0931	27.1457	Other
NCU00259	-0.621415	1	0.0481567	27.4628	39.7513	Other
NCU00260	-0.248757	1	0.504951	26.7076	30.0363	Other
NCU00261	-0.0161057	1	1	27.1452	25.9592	Other
NCU00262	-0.553728	1	0.0918197	25.4665	35.3831	Other
NCU00263	0.0556689	1	0.925651	35.4463	32.2708	Other
NCU00264	-0.271297	1	0.416193	32.3647	36.8987	Other
NCU00265	0.0884055	1	0.814247	35.1685	31.3344	Other
NCU00267	0.161605	1	0.603514	45.9104	38.7291	Other
NCU00268	0.0734829	1	0.870756	35.593	32.047	Other
NCU00269	-0.0463618	1	1	27.0572	26.5014	Other
NCU00270	-0.0847679	1	0.958472	27.2464	27.4126	Other
NCU00271	-0.583645	1	0.222858	12.8388	18.3525	Other
NCU00272	0.222773	1	0.627297	30.4019	24.6876	Other
NCU00273	0.0653881	1	0.91952	29.7596	26.9764	Other
NCU00274	0.255635	1	0.508263	36.0786	28.6029	Other
NCU00275	-0.0709141	1	0.897868	27.7956	27.7193	Other
NCU00276	0.0672162	1	0.868846	34.6417	31.3448	Other
NCU00277	0.11763	1	0.913349	25.9564	22.6944	Other
NCU00278	-0.137011	1	0.879373	19.5615	20.4632	Other
NCU00279	0.0318886	1	1	35.9261	33.3006	Other
NCU00280	0.148242	1	0.7277	27.3002	23.355	Other
NCU00281	-0.0283389	1	0.959912	29.6791	28.7004	Other
NCU00282	0.0614588	1	0.926717	36.273	32.9417	Other
NCU00283	-0.0690561	1	0.955988	24.3394	24.1986	Other
NCU00284	-0.290558	1	0.431136	28.7246	33.2587	Other
NCU00285	-0.32158	1	0.33683	31.1699	36.945	Other
NCU00287	-0.0078427	1	1	33.905	32.2238	Other
NCU00288	-0.65929	1	0.172012	13.5516	20.4952	Other
NCU00289	0.146022	1	0.745952	31.8113	27.196	Other
NCU00290	-0.191838	1	0.599108	34.2364	36.9965	Other
NCU00291	-0.440995	1	0.313115	19.8448	25.5337	Other
NCU00292	0.0873619	1	0.814247	35.1099	31.2794	Other
NCU00293	-0.082397	1	0.801808	35.3805	35.4209	Other
NCU00294	-0.171045	1	0.720183	27.4417	29.3362	Other
NCU00295	0.000296622	1	1	31.9766	30.2674	Other
NCU00296	-0.21421	1	0.550205	26.0322	28.7336	Other
NCU00297	0.0712148	1	0.884873	44.6767	40.445	Other
NCU00298	-0.123676	1	0.755047	36.4367	37.6777	Other
NCU00299	-0.0977294	1	0.796114	33.0946	33.6036	Other
NCU00300	-0.0115908	1	1	28.0802	26.8487	Other
NCU00301	-0.0739706	1	0.897868	28.2295	28.152	Other
NCU00302	0.139165	1	0.802314	31.0022	26.6418	Other
NCU00303	-0.215983	1	0.570556	29.3339	32.2235	Other
NCU00304	-0.151872	1	0.707489	36.9679	38.9609	Other
NCU00305	0.0499326	1	0.980469	31.7383	28.9291	Other
NCU00306	0.100156	1	0.819456	36.9977	32.6934	Other
NCU00307	-0.328142	1	0.574742	15.6845	18.8621	Other
NCU00308	0.00888173	1	1	29.5215	27.8114	Other
NCU00309	0.0593906	1	0.980777	32.3768	29.4817	Other
NCU00310	0.213838	1	0.600217	35.0805	28.655	Other
NCU00311	-0.0341905	1	1	25.6865	24.9523	Other
NCU00312	-0.0934101	1	0.801808	35.0238	35.4628	Other
NCU00313	0.0726058	1	0.882137	42.6967	38.4338	Other
NCU00314	0.0890837	1	0.880693	41.7199	37.2159	Other
NCU00315	-0.139835	1	0.77555	26.8498	28.0471	Other
NCU00316	-0.254032	1	0.462731	27.1979	30.7161	Other
NCU00317	0.182531	1	0.610948	37.2272	31.0791	Other
NCU00318	0.492089	1	0.132098	42.6669	28.7364	Other
NCU00319	-0.107664	1	0.733403	30.8153	31.4308	Other
NCU00320	0.015219	1	1	27.9138	26.1864	Other
NCU00321	-0.0496988	1	0.957691	26.2506	25.7813	Other
NCU00322	0.0776048	1	0.87764	39.8047	35.7775	Other
NCU00324	0.0674854	1	0.915024	27.0345	24.4546	Other
NCU00325	-0.0662597	1	0.909838	36.2607	35.9814	Other
NCU00326	-0.275656	1	0.508786	20.9416	24.077	Other
NCU00327	-0.395583	1	0.440018	14.7996	18.5706	Other
NCU00329	-0.171762	1	0.62897	30.7935	32.8781	Other
NCU00330	-0.115282	1	0.889768	23.8646	24.5567	Other
NCU00331	-0.0553255	1	1	29.7623	29.3492	Other
NCU00332	-0.0581088	1	0.90441	31.917	31.5271	Other
NCU00333	0.0527101	1	1	30.2076	27.6212	Other
NCU00334	0.179106	1	0.681189	30.2847	25.2843	Other
NCU00335	0.00996375	1	1	27.1129	25.614	Other
NCU00336	0.107824	1	0.798953	30.0515	26.3817	Other
NCU00337	0.00814261	1	1	29.7066	28.0611	Other
NCU00338	0.317965	1	0.33295	40.5139	30.8722	Other
NCU00339	0.658043	1	0.0474282	44.3039	26.4898	Other
NCU00340	-0.125103	1	0.771479	26.0587	26.9225	Other
NCU00343	-0.116108	1	0.946288	16.5229	16.8861	Other
NCU00344	0.121283	1	0.798953	30.0287	26.1498	Other
NCU00345	0.0231642	1	1	35.1029	32.7382	Other
NCU00346	-0.0566465	1	0.960578	30.8865	30.3944	Other
NCU00347	-0.229286	1	0.542754	24.7957	27.6193	Other
NCU00348	0.0919753	1	0.824251	39.3828	34.9418	Other
NCU00349	0.0436778	1	0.98188	36.5105	33.5609	Other
NCU00350	0.193877	1	0.588549	32.7935	27.1825	Other
NCU00351	-0.260547	1	0.416193	32.0397	36.4064	Other
NCU00352	0.0449812	1	0.979067	27.6471	25.4148	Other
NCU00353	-0.312081	1	0.466008	16.7264	19.849	Other
NCU00354	-0.292039	1	0.585575	17.1435	19.5038	Other
NCU00355	0.190414	1	0.633228	31.6849	26.2945	Other
NCU00356	-0.000819074	1	1	34.5699	32.821	Other
NCU00357	-0.147894	1	0.71532	26.32	27.6794	Other
NCU00358	-0.0793205	1	0.894049	25.7353	25.769	Other
NCU00359	-0.0326861	1	1	28.3837	27.5053	Other
NCU00360	0.0358803	1	1	33.9075	31.412	Other
NCU00361	0.200034	1	0.58232	31.7684	26.2864	Other
NCU00362	0.19921	1	0.605691	36.2083	29.8462	Other
NCU00363	0.440801	1	0.147734	45.7827	31.9739	Other
NCU00364	-0.0220578	1	1	33.2167	31.8572	Other
NCU00365	-0.824465	1	0.0757974	12.75	21.6843	Other
NCU00366	-0.0945388	1	0.844574	30.7027	31.1321	Other
NCU00367	0.418442	1	0.205529	44.5356	31.5306	Other
NCU00368	0.566838	1	0.0994555	36.6431	23.4184	Other
NCU00369	0.227427	1	0.540537	33.6193	27.1294	Other
NCU00370	0.475089	1	0.155282	39.8709	27.1135	Other
NCU00371	0.0205557	1	1	29.7495	27.8248	Other
NCU00372	0.313737	1	0.345196	37.1491	28.3125	Other
NCU00373	0.00551852	1	1	27.9483	26.389	Other
NCU00375	-0.399639	1	0.261599	25.6065	31.9887	Other
NCU00376	0.135862	1	0.713197	37.2864	32.1154	Other
NCU00377	0.147376	1	0.705048	34.9789	29.8797	Other
NCU00378	0.0630273	1	0.980469	31.5785	28.6198	Other
NCU00379	0.138129	1	0.811467	34.332	29.5519	Other
NCU00380	0.192729	1	0.575476	40.0577	33.1388	Other
NCU00382	-0.0368011	1	0.958472	27.6214	26.8898	Other
NCU00384	-0.661262	1	0.195779	12.7474	19.5959	Other
NCU00385	0.0710461	1	0.92215	32.0884	28.8772	Other
NCU00386	-0.0375258	1	0.964464	37.7812	36.7451	Other
NCU00387	-0.186726	1	0.588383	32.3722	34.8565	Other
NCU00388	-0.157307	1	0.699053	23.3093	24.6753	Other
NCU00389	0.0123462	1	1	31.5273	29.4811	Other
NCU00391	-0.269902	1	0.712992	15.3991	17.8637	Other
NCU00392	-0.0132573	1	1	32.8943	31.4322	Other
NCU00395	-0.130316	1	0.73741	31.5104	32.6621	Other
NCU00396	-0.0437755	1	0.958472	27.4818	26.8273	Other
NCU00397	-0.541288	1	0.108921	23.5874	32.6481	Other
NCU00398	-0.191006	1	0.62344	29.4639	31.8782	Other
NCU00399	-0.00378685	1	1	33.4965	31.7855	Other
NCU00400	-0.110607	1	0.758166	37.6254	38.4506	Other
NCU00401	-0.109467	1	0.786572	30.2175	30.9414	Other
NCU00403	0.130768	1	0.808558	33.2628	28.6867	Other
NCU00404	0.00435772	1	1	37.584	35.5882	Other
NCU00405	-0.0484965	1	0.901301	30.0698	29.4872	Other
NCU00406	-0.282476	1	0.489087	24.3639	28.1505	Other
NCU00407	-0.0658153	1	0.842024	29.7473	29.4947	Other
NCU00408	0.0470897	1	0.927739	37.462	34.203	Other
NCU00409	0.0139129	1	1	33.057	31.0791	Other
NCU00410	-0.0649847	1	0.958472	27.6763	27.4459	Other
NCU00411	0.00311192	1	1	31.3598	29.6201	Other
NCU00412	-0.284082	1	0.409275	30.8748	35.6554	Other
NCU00413	-0.155219	1	0.662013	26.9631	28.5223	Other
NCU00414	-0.0347102	1	0.962945	34.5287	33.5556	Other
NCU00415	0.0632943	1	0.980145	30.6389	27.7979	Other
NCU00416	-0.075495	1	0.836524	27.7756	27.7037	Other
NCU00417	-0.0903887	1	0.907243	33.9941	34.2251	Other
NCU00418	-0.0782865	1	0.851541	33.3558	33.4364	Other
NCU00419	-0.255132	1	0.459122	32.495	36.8869	Other
NCU00420	-0.107793	1	0.889768	24.0802	24.6272	Other
NCU00421	0.0598664	1	0.920868	31.4522	28.4421	Other
NCU00422	-0.335918	1	0.32863	25.7263	30.7477	Other
NCU00423	0.170067	1	0.686423	31.0674	26.187	Other
NCU00424	0.120793	1	0.857835	29.6098	25.8194	Other
NCU00425	0.887548	1	0.00953094	40.0639	20.4541	Other
NCU00426	-0.0324383	1	1	28.8744	28.0978	Other
NCU00427	-0.0495765	1	1	27.9252	27.3846	Other
NCU00428	-0.0578398	1	0.902893	30.9954	30.5731	Other
NCU00430	-0.135345	1	0.729207	29.7965	31.0251	Other
NCU00431	0.0284658	1	1	32.7881	30.5322	Other
NCU00432	0.00247284	1	1	30.7571	29.1017	Other
NCU00434	-0.011751	1	1	29.3261	27.9889	Other
NCU00435	-0.31083	1	0.360863	29.4439	34.6826	Other
NCU00436	0.16367	1	0.741734	30.6554	25.911	Other
NCU00437	-0.0574448	1	0.964931	38.4757	37.9546	Other
NCU00438	-0.132524	1	0.744911	33.4124	34.7608	Other
NCU00439	-0.535512	1	0.305773	12.7721	17.718	Other
NCU00440	-0.176616	1	0.710194	25.5666	27.4564	Other
NCU00441	-0.018086	1	1	28.1115	27.0038	Other
NCU00442	-0.122774	1	0.891972	24.7582	25.5911	Other
NCU00443	-0.0512125	1	1	25.9125	25.5313	Other
NCU00444	-0.256445	1	0.438531	29.6556	33.6192	Other
NCU00445	0.087278	1	0.91952	29.8529	26.6327	Other
NCU00446	-0.0630882	1	0.901301	29.8755	29.5642	Other
NCU00447	-0.0693573	1	0.896011	27.1422	26.9725	Other
NCU00448	0.0751977	1	0.864756	32.6411	29.3885	Other
NCU00449	-0.312897	1	0.294213	34.4053	40.1927	Other
NCU00450	-0.173668	1	0.677817	30.2156	32.3587	Other
NCU00451	-0.321962	1	0.343892	31.8804	37.8309	Other
NCU00453	-0.0809971	1	0.901301	29.9948	30.0655	Other
NCU00454	0.0143925	1	1	31.955	29.9274	Other
NCU00455	-0.00641623	1	1	28.2169	26.8626	Other
NCU00456	-0.322158	1	0.47161	22.1959	26.4392	Other
NCU00457	-0.127507	1	0.827079	24.2534	25.1509	Other
NCU00458	-0.804338	1	0.0256142	20.1359	33.3165	Other
NCU00459	0.0712537	1	0.857835	29.2412	26.3968	Other
NCU00461	0.0187618	1	1	32.7024	30.5974	Other
NCU00462	-0.377007	1	0.550266	13.4929	16.7796	Other
NCU00463	-0.158759	1	0.691596	32.8268	34.7906	Other
NCU00464	-0.0127945	1	1	25.6674	24.4997	Other
NCU00465	-0.015235	1	1	31.0341	29.764	Other
NCU00466	-0.00958756	1	1	33.1194	31.5952	Other
NCU00467	-0.0261241	1	1	30.4186	29.3476	Other
NCU00468	-0.160085	1	0.613735	37.1913	39.3743	Other
NCU00469	0.257431	1	0.420051	42.7137	33.8809	Other
NCU00470	0.150602	1	0.668085	38.7112	33.0247	Other
NCU00471	-0.12762	1	0.758166	37.7529	39.0767	Other
NCU00472	-0.144636	1	0.71532	26.3719	27.686	Other
NCU00473	-0.0949093	1	0.786572	30.0283	30.4843	Other
NCU00474	-0.550142	1	0.102621	27.4521	37.9936	Other
NCU00475	-0.194124	1	0.662013	26.7678	29.0297	Other
NCU00476	-0.265871	1	0.438531	29.7837	33.9001	Other
NCU00477	-0.112021	1	0.733403	30.7238	31.5044	Other
NCU00478	-0.267623	1	0.526675	23.0584	26.3657	Other
NCU00480	-0.0174298	1	1	28.469	27.3	Other
NCU00481	-0.018474	1	0.959912	29.7686	28.5884	Other
NCU00483	-0.0540001	1	0.907243	34.3026	33.7853	Other
NCU00484	-0.262396	1	0.452508	31.8489	36.0357	Other
NCU00485	-0.0260915	1	1	19.1812	18.6744	Other
NCU00486	-0.185268	1	0.650087	25.1444	27.0837	Other
NCU00487	-0.214797	1	0.588383	32.068	35.1927	Other
NCU00488	-0.159802	1	0.71532	26.5182	28.1349	Other
NCU00489	-0.0972219	1	0.901301	29.9424	30.3425	Other
NCU00490	-0.21317	1	0.550205	26.1548	28.7665	Other
NCU00491	-0.757628	1	0.166408	11.0334	17.9117	Other
NCU00492	0.00164967	1	1	29.39	27.8827	Other
NCU00493	0.0247268	1	1	28.9038	26.9283	Other
NCU00494	0.100174	1	0.816907	36.1081	31.9662	Other
NCU00495	0.126581	1	0.805511	31.9793	27.7645	Other
NCU00496	-0.799654	1	0.0131722	25.5101	42.0537	Other
NCU00497	-0.252797	1	0.452508	31.6434	35.7411	Other
NCU00498	0.100573	1	0.816907	36.3487	32.0994	Other
NCU00499	-0.146748	1	0.823547	23.2518	24.3827	Other
NCU00500	-0.737752	1	0.12195	13.4243	21.395	Other
NCU00501	0.0240921	1	1	29.9422	27.8877	Other
NCU00502	0.00587662	1	1	26.8309	25.3609	Other
NCU00503	-0.112974	1	0.786572	29.8095	30.6183	Other
NCU00504	-0.0999066	1	0.7899	31.0229	31.4713	Other
NCU00505	-0.112343	1	0.83355	26.8146	27.3657	Other
NCU00506	-0.00826228	1	1	29.8279	28.2919	Other
NCU00509	-0.535748	1	0.108784	25.7731	35.5616	Other
NCU00510	-0.86227	1	0.076739	11.043	19.1695	Other
NCU00512	0.196483	1	0.605691	36.2881	29.9802	Other
NCU00513	-0.0488613	1	1	29.9902	29.3468	Other
NCU00515	0.147952	1	0.691408	31.8454	27.2231	Other
NCU00516	-0.401967	1	0.409899	12.7223	16.0246	Other
NCU00517	0.0958497	1	0.92215	32.1322	28.4836	Other
NCU00518	-0.231906	1	0.504951	26.567	29.5749	Other
NCU00519	-0.357839	1	0.379835	22.6516	27.4572	Other
NCU00520	-0.287085	1	0.46218	21.4319	24.8329	Other
NCU00521	0.0345064	1	0.980145	30.5621	28.2858	Other
NCU00522	0.381386	1	0.379392	31.1911	22.6463	Other
NCU00523	0.136197	1	0.795415	28.8495	24.8797	Other
NCU00524	0.210615	1	0.526411	39.335	32.2204	Other
NCU00525	0.504586	1	0.121399	40.7358	27.2141	Other
NCU00526	0.331696	1	0.365671	34.3996	25.8867	Other
NCU00527	0.162326	1	0.696163	33.0421	27.959	Other
NCU00528	-0.046781	1	1	24.7529	24.2128	Other
NCU00529	0.842226	1	0.024657	35.8843	18.9301	Other
NCU00530	0.88889	1	0.00795797	44.6235	22.7736	Other
NCU00531	0.83102	1	0.0169451	41.2833	22.0086	Other
NCU00532	0.711122	1	0.0414916	39.6375	22.8582	Other
NCU00533	0.36396	1	0.337811	36.0454	26.463	Other
NCU00534	-0.206476	1	0.564081	28.0546	30.6853	Other
NCU00535	-0.404664	1	0.30117	22.2228	27.9091	Other
NCU00536	0.0230899	1	1	27.9627	26.1604	Other
NCU00537	-0.0483875	1	1	26.9802	26.4293	Other
NCU00538	0.108849	1	0.798953	30.1208	26.4529	Other
NCU00541	-0.0561123	1	0.955055	23.4716	23.1318	Other
NCU00542	-0.219935	1	0.605243	26.3757	29.1709	Other
NCU00545	0.102789	1	0.852583	27.3638	24.1428	Other
NCU00547	-0.382095	1	0.235406	29.8773	36.8107	Other
NCU00548	-0.180341	1	0.588383	32.3038	34.666	Other
NCU00549	-0.371949	1	0.32863	25.2939	31.1176	Other
NCU00550	0.0587483	1	0.924537	34.0346	30.9989	Other
NCU00551	-0.0253334	1	1	25.3135	24.4314	Other
NCU00552	0.147243	1	0.672296	39.5945	33.8072	Other
NCU00553	0.0721746	1	0.920868	30.8632	27.8283	Other
NCU00554	0.0120346	1	1	29.7217	27.9526	Other
NCU00556	0.0619934	1	0.980469	31.6941	28.7378	Other
NCU00557	-0.503367	1	0.328887	11.3664	15.2941	Other
NCU00558	0.0826986	1	0.868846	34.4352	30.8055	Other
NCU00559	0.0085919	1	1	32.3766	30.4803	Other
NCU00560	0.0648056	1	0.913349	25.943	23.5942	Other
NCU00561	-0.711353	1	0.116772	15.2674	23.7487	Other
NCU00562	0.0976335	1	0.808558	32.9006	29.1285	Other
NCU00563	0.000630527	1	1	33.3913	31.5524	Other
NCU00564	0.166528	1	0.659151	36.4182	30.7984	Other
NCU00565	0.110178	1	0.846703	25.5909	22.4416	Other
NCU00566	-0.0329518	1	1	29.8597	28.9811	Other
NCU00567	-0.0101385	1	1	25.9288	24.7803	Other
NCU00568	-0.00128028	1	1	31.8623	30.1741	Other
NCU00569	-0.30011	1	0.446523	24.906	28.9643	Other
NCU00570	-0.189399	1	0.576753	29.7575	32.3921	Other
NCU00571	-0.278698	1	0.47161	22.2525	25.6538	Other
NCU00572	-0.5103	1	0.127924	26.6244	35.9847	Other
NCU00573	-0.1081	1	0.889768	23.9602	24.4881	Other
NCU00574	-0.279342	1	0.586634	11.416	13.1141	Other
NCU00575	-0.153703	1	0.81979	22.242	23.5	Other
NCU00576	-0.103214	1	0.830407	25.4136	25.8312	Other
NCU00577	-0.114177	1	0.78308	28.776	29.539	Other
NCU00578	-0.498035	1	0.18364	20.0625	26.8737	Other
NCU00579	-0.0496929	1	0.957691	26.4053	25.9011	Other
NCU00580	0.168853	1	0.686423	30.9431	26.0144	Other
NCU00581	-0.122821	1	0.779412	27.9598	28.9028	Other
NCU00582	-0.0275921	1	1	32.396	31.2619	Other
NCU00583	-0.686311	1	0.1814	12.0519	18.3901	Other
NCU00584	0.0357526	1	1	28.0633	25.957	Other
NCU00585	-0.0931362	1	0.827079	24.3283	24.651	Other
NCU00586	-0.345014	1	0.389327	23.3911	28.0937	Other
NCU00587	-0.0403392	1	1	26.7666	26.0642	Other
NCU00589	0.0413943	1	0.978242	25.6218	23.571	Other
NCU00590	0.0214064	1	1	27.5886	25.8305	Other
NCU00591	0.0837979	1	0.920868	31.2833	27.946	Other
NCU00592	0.141769	1	0.745952	31.8828	27.3078	Other
NCU00593	-0.0384235	1	0.959211	28.5586	27.8137	Other
NCU00594	-0.309412	1	0.550266	13.804	16.3053	Other
NCU00595	-0.143029	1	0.823547	23.476	24.6156	Other
NCU00596	-0.112525	1	0.762624	24.1849	24.784	Other
NCU00597	-0.138236	1	0.672798	29.2613	30.5094	Other
NCU00598	0.059625	1	0.980145	30.478	27.7905	Other
NCU00599	0.163675	1	0.745952	31.7782	26.826	Other
NCU00600	-0.0593137	1	0.957691	26.5202	26.1569	Other
NCU00602	0.291477	1	0.480504	32.1121	24.8725	Other
NCU00603	0.0983903	1	0.798953	29.7568	26.44	Other
NCU00604	0.0926602	1	0.824251	39.4134	35.0129	Other
NCU00605	0.383213	1	0.234329	44.7145	32.47	Other
NCU00606	0.255748	1	0.46288	43.5024	34.4709	Other
NCU00607	0.633021	1	0.0352114	48.0908	29.1066	Other
NCU00608	0.138299	1	0.811467	34.3589	29.569	Other
NCU00609	-0.0703265	1	0.960578	30.421	30.2412	Other
NCU00611	0.00823314	1	1	28.5465	26.9192	Other
NCU00614	0.0793222	1	0.868846	34.6931	31.1039	Other
NCU00616	-0.310371	1	0.360863	29.5941	34.8656	Other
NCU00617	-0.194648	1	0.617656	28.6976	31.1891	Other
NCU00618	-0.212527	1	0.557305	27.0662	29.7853	Other
NCU00619	-0.00549095	1	1	34.2413	32.5944	Other
NCU00620	-0.182707	1	0.656205	26.1774	28.1279	Other
NCU00621	-0.0438765	1	0.959912	29.4988	28.8608	Other
NCU00622	0.0556985	1	0.978666	26.6287	24.2915	Other
NCU00623	-0.14324	1	0.77555	27.3042	28.4892	Other
NCU00624	-0.0227462	1	1	29.4715	28.2625	Other
NCU00627	-0.225484	1	0.526675	23.1628	25.6824	Other
NCU00628	-0.00622516	1	1	35.436	33.7322	Other
NCU00629	-0.0815055	1	0.889768	23.9524	24.0802	Other
NCU00630	-0.11177	1	0.847004	31.5241	32.243	Other
NCU00631	0.0545072	1	0.926717	36.133	32.973	Other
NCU00632	-0.0423262	1	0.899629	29.2148	28.5329	Other
NCU00633	0.174042	1	0.610948	37.3204	31.1987	Other
NCU00634	-0.151769	1	0.767178	24.8469	26.195	Other
NCU00635	-0.0736762	1	0.959211	28.3894	28.3524	Other
NCU00636	0.0155943	1	1	28.6189	26.8153	Other
NCU00638	-0.0516447	1	0.909838	36.5127	35.7453	Other
NCU00640	0.200192	1	0.681189	30.3009	24.8441	Other
NCU00641	0.154858	1	0.676352	41.4644	34.8216	Other
NCU00642	0.337958	1	0.380646	36.8847	27.6075	Other
NCU00643	-0.0973475	1	0.793077	32.1462	32.5165	Other
NCU00644	-0.232536	1	0.550205	25.8485	28.889	Other
NCU00646	-0.491674	1	0.161762	23.0944	30.8756	Other
NCU00648	0.302981	1	0.366005	40.5631	31.0957	Other
NCU00649	-0.00571694	1	1	32.5297	30.9672	Other
NCU00650	0.0888213	1	0.916606	28.2183	25.1484	Other
NCU00651	-0.208282	1	0.591542	24.3851	26.7008	Other
NCU00652	0.483333	1	0.149159	38.5505	26.1093	Other
NCU00653	0.0933317	1	0.872585	36.7684	32.6818	Other
NCU00654	-0.203343	1	0.611598	27.5353	30.0032	Other
NCU00655	0.170928	1	0.783563	25.8057	21.7044	Other
NCU00656	0.119359	1	0.864756	32.7046	28.5497	Other
NCU00657	0.21683	1	0.526411	39.2834	32.0317	Other
NCU00658	0.322584	1	0.319302	38.4909	29.1333	Other
NCU00659	-0.0872646	1	0.897868	27.7959	27.9994	Other
NCU00660	0.1986	1	0.633228	31.846	26.2167	Other
NCU00662	0.195961	1	0.575476	39.902	32.9644	Other
NCU00663	0.0984597	1	0.808558	32.8943	29.1141	Other
NCU00664	0.10212	1	0.872585	36.724	32.4257	Other
NCU00665	0.0387594	1	0.927739	37.0213	34.1638	Other
NCU00666	0.120119	1	0.753802	33.5924	29.337	Other
NCU00667	-0.0184923	1	1	28.0701	27.0366	Other
NCU00668	0.0168934	1	1	26.4574	24.8097	Other
NCU00669	0.134529	1	0.741734	30.4128	26.2795	Other
NCU00670	-0.0109197	1	1	31.0457	29.5124	Other
NCU00671	0.235315	1	0.533836	32.3973	26.0892	Other
NCU00673	-0.0915205	1	0.894049	25.984	26.2528	Other
NCU00674	0.116895	1	0.776457	40.9442	35.7183	Other
NCU00675	0.149794	1	0.798953	30.0084	25.6287	Other
NCU00676	0.232632	1	0.546958	34.4777	27.8241	Other
NCU00677	0.0249662	1	0.982127	37.5826	34.9955	Other
NCU00678	0.00506266	1	1	36.5529	34.518	Other
NCU00679	0.0790669	1	0.925651	35.3031	31.5988	Other
NCU00680	0.0656899	1	0.979445	28.5202	25.8695	Other
NCU00681	0.148113	1	0.791683	28.0716	24.0241	Other
NCU00682	-0.211027	1	0.679638	20.537	22.5565	Other
NCU00684	0.0942583	1	0.918102	29.2146	25.9588	Other
NCU00685	-0.178605	1	0.643631	24.0729	25.8221	Other
NCU00687	-0.162671	1	0.767178	24.7472	26.2954	Other
NCU00688	-0.337216	1	0.275285	35.4465	42.4823	Other
NCU00689	0.135393	1	0.741734	30.4211	26.2811	Other
NCU00690	0.167496	1	0.644288	33.5407	28.3217	Other
NCU00691	-0.0270946	1	0.960578	30.4786	29.4634	Other
NCU00692	-0.0792243	1	0.839345	28.4516	28.4901	Other
NCU00693	-0.182222	1	0.699053	23.1045	24.9511	Other
NCU00694	-0.0842278	1	0.836524	27.434	27.5942	Other
NCU00695	0.048528	1	0.980145	30.5846	28.0397	Other
NCU00696	-0.0428242	1	0.958472	27.2655	26.6444	Other
NCU00697	0.0686697	1	0.930565	40.36	36.4396	Other
NCU00698	0.480313	1	0.143187	41.0981	27.8369	Other
NCU00699	0.208753	1	0.638884	32.7527	26.7235	Other
NCU00700	0.386475	1	0.288574	39.3733	28.4722	Other
NCU00701	0.110497	1	0.757463	34.7075	30.3541	Other
NCU00704	-0.195144	1	0.532727	30.9426	33.4157	Other
NCU00705	0.363908	1	0.253084	43.2033	31.7681	Other
NCU00706	-0.191123	1	0.611598	27.5678	29.8619	Other
NCU00707	0.139431	1	0.760966	35.6496	30.7113	Other
NCU00708	0.330194	1	0.279811	42.9056	32.2263	Other
NCU00709	0.165218	1	0.630053	41.1726	34.7123	Other
NCU00710	0.142545	1	0.713197	37.1367	31.8163	Other
NCU00711	-0.140425	1	0.677817	30.1222	31.4479	Other
NCU00712	-0.0625217	1	0.954061	22.3969	22.2002	Other
NCU00713	-0.00564752	1	1	21.4864	20.4549	Other
NCU00714	0.0744551	1	0.978242	25.3505	22.8207	Other
NCU00715	0.136559	1	0.745952	31.6596	27.3042	Other
NCU00716	0.25329	1	0.501739	35.0716	27.8287	Other
NCU00717	-0.12624	1	0.762624	24.1276	24.9686	Other
NCU00718	-0.425985	1	0.179985	28.9051	36.6932	Other
NCU00719	0.0561599	1	0.981072	33.9306	30.8328	Other
NCU00720	0.140067	1	0.791683	27.7845	23.8834	Other
NCU00721	-0.0812985	1	0.844574	30.3668	30.4594	Other
NCU00722	-0.0356246	1	1	27.076	26.2988	Other
NCU00723	0.315236	1	0.387758	37.7521	28.699	Other
NCU00724	0.20745	1	0.59021	43.0516	35.3285	Other
NCU00725	0.0416633	1	0.979445	28.2464	26.0315	Other
NCU00726	-0.235231	1	0.584135	23.171	25.8914	Other
NCU00727	-0.0891343	1	0.78308	29.3117	29.4955	Other
NCU00728	0.108742	1	0.764322	36.7477	32.2658	Other
NCU00729	-0.32336	1	0.419259	21.9455	26.0208	Other
NCU00730	-0.138439	1	0.786572	30.1249	31.393	Other
NCU00732	0.241963	1	0.520585	38.4662	30.7793	Other
NCU00733	-0.223538	1	0.465505	33.8921	37.4743	Other
NCU00734	0.0416208	1	0.92215	31.9658	29.3868	Other
NCU00735	-0.319943	1	0.370689	25.767	30.6437	Other
NCU00736	0.288701	1	0.472806	31.1234	24.0568	Other
NCU00737	0.31948	1	0.387758	37.8524	28.66	Other
NCU00738	0.10434	1	0.864756	32.6246	28.7218	Other
NCU00739	0.746219	1	0.0223959	44.0617	25.0603	Other
NCU00740	0.148141	1	0.709208	35.9441	30.744	Other
NCU00741	-0.152001	1	0.653379	35.4945	37.3413	Other
NCU00742	-0.106862	1	0.755047	36.8785	37.6	Other
NCU00743	0.0815157	1	0.846703	25.1235	22.5615	Other
NCU00744	0.0166464	1	1	30.32	28.3646	Other
NCU00745	-0.0450249	1	0.964464	38.142	37.1521	Other
NCU00746	-0.160239	1	0.667536	28.126	29.7778	Other
NCU00747	0.343967	1	0.265222	45.7053	33.9525	Other
NCU00748	0.0500271	1	0.918102	28.9086	26.4807	Other
NCU00749	0.207518	1	0.62107	29.2491	24.0148	Other
NCU00751	-0.697002	1	0.0461444	20.6558	31.798	Other
NCU00752	0.280787	1	0.344273	48.6473	37.8695	Other
NCU00753	-0.0700078	1	0.901301	29.9844	29.8032	Other
NCU00754	0.3348	1	0.319302	38.8676	29.1793	Other
NCU00755	0.0333717	1	1	33.1048	30.6455	Other
NCU00756	-0.385276	1	0.418784	17.4874	21.6631	Other
NCU00757	0.678902	1	0.056108	38.8801	22.9539	Other
NCU00758	0.373491	1	0.302097	41.552	30.3324	Other
NCU00759	-0.0428229	1	0.952997	21.5629	21.0891	Other
NCU00760	-0.25653	1	0.646747	16.0385	18.2122	Other
NCU00761	-0.00771919	1	1	27.1941	25.8829	Other
NCU00762	0.120858	1	0.808558	33.1997	28.9142	Other
NCU00763	0.51698	1	0.121399	40.9217	27.0719	Other
NCU00764	0.513022	1	0.115976	39.7734	26.2425	Other
NCU00765	0.481138	1	0.148827	42.4011	28.6318	Other
NCU00766	-0.0556134	1	0.901301	30.1441	29.6411	Other
NCU00768	0.0174483	1	1	32.213	30.1604	Other
NCU00770	0.27716	1	0.436869	32.441	25.3441	Other
NCU00771	-0.0474206	1	1	26.8631	26.3543	Other
NCU00772	0.0108927	1	1	28.0193	26.4302	Other
NCU00773	-0.265025	1	0.452508	31.7948	36.1307	Other
NCU00774	-0.286719	1	0.431136	28.8001	33.2865	Other
NCU00775	-0.0689857	1	0.894049	26.184	26.0491	Other
NCU00776	0.0369137	1	0.979804	29.7583	27.473	Other
NCU00777	-0.0162005	1	0.959211	28.722	27.5319	Other
NCU00778	-0.0106127	1	1	29.3415	28.0735	Other
NCU00779	0.205986	1	0.681189	29.8154	24.646	Other
NCU00780	-0.103537	1	0.779412	27.9968	28.5681	Other
NCU00781	0.705083	1	0.0144794	53.7475	31.093	Other
NCU00782	0.463999	1	0.155282	39.4746	27.1233	Other
NCU00783	-0.113418	1	0.879373	20.0864	20.3172	Other
NCU00784	0.219482	1	0.533836	32.4359	26.4513	Other
NCU00786	-0.10811	1	0.748428	34.6853	35.3448	Other
NCU00787	-0.790463	1	0.0225279	20.4622	33.6916	Other
NCU00788	0.0203094	1	1	35.1172	32.7708	Other
NCU00789	0.157445	1	0.686423	31.2064	26.4843	Other
NCU00790	0.275759	1	0.418552	35.9478	28.1354	Other
NCU00792	0.120153	1	0.798953	29.9354	26.1021	Other
NCU00793	-0.125086	1	0.77555	27.1085	28.0446	Other
NCU00794	0.0261379	1	1	32.0578	29.8074	Other
NCU00795	0.240944	1	0.438829	38.9297	31.2741	Other
NCU00796	0.0865123	1	0.979067	27.5951	24.6747	Other
NCU00797	0.0872989	1	0.814247	34.8711	31.1202	Other
NCU00798	0.246014	1	0.501739	35.1504	28.0818	Other
NCU00799	0.182461	1	0.705048	35.2869	29.4513	Other
NCU00800	0.0581392	1	0.925651	35.0402	31.8304	Other
NCU00801	0.203862	1	0.633228	31.4213	25.8508	Other
NCU00802	0.463769	1	0.148827	42.1529	28.8911	Other
NCU00803	0.355048	1	0.345196	37.3748	27.6251	Other
NCU00804	-0.676234	1	0.132844	14.8138	22.4177	Other
NCU00805	-0.204217	1	0.747174	20.7443	22.6683	Other
NCU00806	0.0308655	1	1	30.7625	28.5067	Other
NCU00807	0.409056	1	0.211323	45.8339	32.4858	Other
NCU00808	0.132683	1	0.811467	34.308	29.6377	Other
NCU00809	0.163751	1	0.705048	35.0735	29.6064	Other
NCU00810	0.30186	1	0.403774	34.1379	26.2612	Other
NCU00811	-0.0937296	1	0.786572	30.2852	30.6082	Other
NCU00812	-0.100789	1	0.83355	26.6213	27.049	Other
NCU00813	-0.0860246	1	0.836524	27.4778	27.6311	Other
NCU00814	0.208692	1	0.638884	32.4579	26.6646	Other
NCU00817	0.816238	1	0.0200454	40.8602	21.9588	Other
NCU00818	-0.131354	1	0.703747	36.4492	37.8148	Other
NCU00819	-0.432506	1	0.259159	18.6571	23.8653	Other
NCU00821	0.24804	1	0.458922	35.4488	28.2902	Other
NCU00822	0.361521	1	0.295426	40.3504	29.6339	Other
NCU00823	0.0946247	1	0.857835	29.8157	26.3944	Other
NCU00824	0.217206	1	0.627297	30.404	24.7957	Other
NCU00825	0.103713	1	0.828682	41.1786	36.2556	Other
NCU00826	0.257751	1	0.478602	38.7745	30.6822	Other
NCU00827	0.176972	1	0.741734	30.5966	25.745	Other
NCU00828	-0.084749	1	0.897868	28.0504	28.2864	Other
NCU00829	0.311032	1	0.379392	30.8595	23.5448	Other
NCU00830	0.0920346	1	0.862562	31.7992	28.1877	Other
NCU00831	0.0264671	1	0.979445	28.2186	26.3255	Other
NCU00832	-0.3883	1	0.297962	25.8615	32.1471	Other
NCU00833	0.148136	1	0.745952	31.7032	27.114	Other
NCU00834	-0.216722	1	0.617656	28.2094	31.2005	Other
NCU00835	-0.141705	1	0.771479	25.9098	27.0747	Other
NCU00836	-0.122805	1	0.78308	29.2095	30.2015	Other
NCU00837	-0.0021473	1	1	35.4382	33.5812	Other
NCU00838	0.262172	1	0.540537	33.6429	26.5214	Other
NCU00839	0.0595291	1	0.980469	31.6095	28.9038	Other
NCU00840	-0.0234399	1	1	30.3989	29.1731	Other
NCU00841	0.186337	1	0.649456	34.5681	28.7292	Other
NCU00842	0.47125	1	0.116774	49.5612	34.34	Other
NCU00843	0.104551	1	0.870756	35.7826	31.3977	Other
NCU00844	0.445075	1	0.148827	42.1603	29.309	Other
NCU00845	0.14874	1	0.720707	39.356	33.5967	Other
NCU00846	-0.121094	1	0.842024	29.3225	30.2334	Other
NCU00847	-0.133495	1	0.720183	27.5541	28.6613	Other
NCU00848	-0.201164	1	0.599108	34.1157	37.1796	Other
NCU00849	-0.604418	1	0.12881	19.0063	27.3835	Other
NCU00850	-0.0927686	1	0.851541	33.6011	33.7793	Other
NCU00851	-0.929204	1	0.0383561	12.5413	22.6367	Other
NCU00852	-0.4105	1	0.253061	24.6736	31.0236	Other
NCU00853	0.0766368	1	0.85528	28.2897	25.5012	Other
NCU00854	-0.0964509	1	0.889768	24.1469	24.4628	Other
NCU00855	0.0204791	1	1	38.6288	35.824	Other
NCU00856	0.140562	1	0.705048	35.2643	30.3041	Other
NCU00857	0.0250855	1	1	33.388	31.0547	Other
NCU00859	0.0206723	1	1	39.9627	37.2925	Other
NCU00860	0.029018	1	1	36.168	33.6735	Other
NCU00861	-0.0944682	1	0.801808	35.1229	35.4883	Other
NCU00862	-0.0324497	1	0.960578	30.4348	29.5117	Other
NCU00863	0.109369	1	0.798953	30.0344	26.3706	Other
NCU00864	-0.0963447	1	0.830407	25.6007	25.9662	Other
NCU00865	0.00277513	1	1	29.1688	27.5964	Other
NCU00866	0.0722572	1	0.915024	27.0307	24.4248	Other
NCU00867	-0.0694849	1	0.894049	25.8842	25.7928	Other
NCU00868	0.0624437	1	0.864756	32.3769	29.3947	Other
NCU00869	0.159176	1	0.709208	36.1717	30.6742	Other
NCU00870	0.214155	1	0.605691	36.2309	29.5846	Other
NCU00871	0.0306711	1	1	35.3913	32.8026	Other
NCU00872	0.220074	1	0.570201	38.7934	31.6058	Other
NCU00873	0.0665441	1	0.925651	34.9284	31.5913	Other
NCU00874	0.280434	1	0.425549	37.2186	28.993	Other
NCU00875	0.340332	1	0.245936	46.7395	34.9439	Other
NCU00876	0.0195139	1	1	38.1987	35.669	Other
NCU00877	-0.156231	1	0.682613	31.1398	32.7634	Other
NCU00878	-0.189411	1	0.537133	39.2871	42.3361	Other
NCU00879	0.0322696	1	1	26.8237	24.8796	Other
NCU00880	0.0968487	1	0.85528	28.3741	25.1779	Other
NCU00881	-0.0959389	1	0.891972	25.0168	25.3394	Other
NCU00882	-0.247971	1	0.504951	26.6941	30.1131	Other
NCU00883	0.102224	1	0.87764	40.0005	35.2831	Other
NCU00884	0.0734952	1	0.979445	28.4448	25.6476	Other
NCU00885	0.556492	1	0.0866886	43.088	27.7191	Other
NCU00886	-0.284764	1	0.394686	28.9689	33.4529	Other
NCU00887	-0.0554557	1	0.909838	36.054	35.5527	Other
NCU00889	0.0239742	1	0.980145	30.4772	28.4262	Other
NCU00890	0.0227584	1	0.981353	34.4967	32.221	Other
NCU00891	0.0910753	1	0.811467	33.9509	30.1928	Other
NCU00892	0.115157	1	0.811467	33.9979	29.7255	Other
NCU00893	0.227207	1	0.520585	38.1164	30.8421	Other
NCU00894	0.0521593	1	0.913349	25.7796	23.5526	Other
NCU00895	-0.0499596	1	1	25.678	25.2601	Other
NCU00896	-0.0127058	1	1	26.5223	25.3696	Other
NCU00897	0.0469772	1	0.91952	29.9119	27.4928	Other
NCU00898	-0.0609099	1	0.901301	30.2503	29.8676	Other
NCU00899	-0.187625	1	0.710194	25.3689	27.4117	Other
NCU00900	-0.0838728	1	0.894049	25.8883	26.0259	Other
NCU00901	0.32362	1	0.418552	36.3545	27.4744	Other
NCU00902	-0.2327	1	0.504951	26.5277	29.5449	Other
NCU00903	-0.198338	1	0.564081	28.069	30.619	Other
NCU00904	0.00249347	1	1	28.5931	27.0965	Other
NCU00905	-0.099773	1	0.830407	25.1837	25.6019	Other
NCU00906	-0.340624	1	0.345315	27.6699	33.2654	Other
NCU00907	-0.0399945	1	0.946288	16.6969	16.0419	Other
NCU00911	-0.110674	1	0.771479	26.0725	26.7127	Other
NCU00912	-0.0549251	1	0.961816	32.6046	32.1007	Other
NCU00913	-0.0994499	1	0.836524	27.7282	28.1722	Other
NCU00914	-0.0394232	1	1	25.7578	25.1232	Other
NCU00915	0.276984	1	0.526836	31.7017	24.784	Other
NCU00916	-0.215044	1	0.570556	29.2654	32.1662	Other
NCU00917	0.0963835	1	0.870756	35.5121	31.4153	Other
NCU00918	-0.106359	1	0.83355	26.4128	26.9082	Other
NCU00919	0.0891746	1	0.857835	29.6006	26.433	Other
NCU00920	-0.0233363	1	0.960578	30.7068	29.6088	Other
NCU00921	-0.219079	1	0.519435	28.7068	31.7032	Other
NCU00922	-0.539312	1	0.288857	11.5972	16.1267	Other
NCU00923	-0.157708	1	0.704781	24.2029	25.6312	Other
NCU00924	-0.150783	1	0.73741	31.3733	33.0899	Other
NCU00925	-0.175122	1	0.634263	31.692	33.926	Other
NCU00926	0.284791	1	0.47228	37.8484	29.4346	Other
NCU00927	-0.0702684	1	0.959211	28.4807	28.3431	Other
NCU00928	-0.0468877	1	1	33.9911	33.3039	Other
NCU00929	-0.181112	1	0.62344	29.7517	31.9761	Other
NCU00930	-0.321401	1	0.378992	27.03	32.1034	Other
NCU00931	-0.03496	1	0.962945	34.7138	33.6943	Other
NCU00932	0.293922	1	0.345844	42.9643	33.1671	Other
NCU00934	-0.499489	1	0.37852	13.8611	18.8392	Other
NCU00935	-0.0301873	1	1	23.2096	22.4674	Other
NCU00936	0.0837542	1	0.920868	31.3957	28.0096	Other
NCU00937	-0.50313	1	0.127924	26.7718	36.0174	Other
NCU00938	-0.0914982	1	0.842024	29.5815	29.9531	Other
NCU00939	-0.00955311	1	1	28.111	26.8479	Other
NCU00940	-0.358603	1	0.440018	14.7944	18.1036	Other
NCU00941	0.147565	1	0.798953	30.0793	25.7439	Other
NCU00943	0.093446	1	0.828682	41.4781	36.7809	Other
NCU00944	-0.0530185	1	0.959211	28.4206	27.9389	Other
NCU00945	-0.152271	1	0.73741	31.5692	33.2221	Other
NCU00946	-0.34244	1	0.378992	27.0766	32.4083	Other
NCU00947	-0.586681	1	0.052422	30.6812	43.5942	Other
NCU00948	-0.318411	1	0.477731	17.6927	20.8441	Other
NCU00949	-0.0730769	1	0.83355	26.6925	26.6213	Other
NCU00950	0.112416	1	0.915024	26.9449	23.6439	Other
NCU00951	-0.125189	1	0.762624	23.9188	24.7591	Other
NCU00952	0.113727	1	0.821902	38.0516	33.2968	Other
NCU00953	-0.00078669	1	1	27.4056	25.9572	Other
NCU00954	0.162252	1	0.654405	35.8052	30.287	Other
NCU00955	-0.0248054	1	1	29.8416	28.7681	Other
NCU00956	0.00676047	1	1	34.575	32.5704	Other
NCU00957	-0.386178	1	0.261599	25.5624	31.756	Other
NCU00958	0.028735	1	1	28.9966	26.8592	Other
NCU00959	-0.070101	1	0.959912	29.3402	29.1485	Other
NCU00960	-0.128101	1	0.720183	27.5361	28.6062	Other
NCU00961	-0.440053	1	0.37852	14.3206	18.545	Other
NCU00962	0.142341	1	0.741734	30.6138	26.2985	Other
NCU00963	-0.100726	1	0.844574	30.8622	31.2987	Other
NCU00964	0.12135	1	0.866848	33.8081	29.4433	Other
NCU00965	-0.0790584	1	0.844574	30.4184	30.5516	Other
NCU00966	-0.00985378	1	1	31.7837	30.4422	Other
NCU00967	0.149591	1	0.753802	33.825	28.8961	Other
NCU00968	0.0342495	1	1	32.2101	29.8192	Other
NCU00969	0.128362	1	0.76754	37.6777	32.5756	Other
NCU00970	0.137973	1	0.773599	39.9209	34.3603	Other
NCU00971	0.096414	1	0.920868	31.1553	27.5974	Other
NCU00972	-0.176974	1	0.542035	40.511	43.3514	Other
NCU00973	-0.0542889	1	0.872253	45.7843	45.0192	Other
NCU00974	-0.366548	1	0.251937	28.3643	34.6114	Other
NCU00975	0.0858029	1	0.826509	40.2599	35.977	Other
NCU00976	0.199605	1	0.686423	31.1952	25.78	Other
NCU00977	-0.0516835	1	0.957691	26.4987	25.9414	Other
NCU00978	-0.170452	1	0.710194	25.4092	27.1407	Other
NCU00979	-0.265354	1	0.454805	26.3146	29.8599	Other
NCU00980	0.0382001	1	1	28.0798	25.9122	Other
NCU00981	-0.121685	1	0.73741	31.4199	32.3744	Other
NCU00983	-0.212119	1	0.542754	25.0517	27.5571	Other
NCU00984	-0.00622684	1	1	31.5408	30.0397	Other
NCU00985	0.613612	1	0.0679858	42.016	25.9515	Other
NCU00986	0.436743	1	0.220249	38.2698	26.6569	Other
NCU00987	0.135405	1	0.700704	34.0568	29.3403	Other
NCU00988	0.385286	1	0.260107	39.6918	28.7431	Other
NCU00989	-0.404857	1	0.440018	14.6113	18.3527	Other
NCU00990	-0.0770842	1	0.851541	33.5052	33.4411	Other
NCU00992	-0.157951	1	0.704781	24.4944	25.9474	Other
NCU00993	-0.0323552	1	1	29.2923	28.3592	Other
NCU00994	-0.197224	1	0.62344	29.416	32.0576	Other
NCU00995	-0.95224	1	0.0428837	10.2998	19.0643	Other
NCU00998	0.133038	1	0.802314	31.1839	26.8896	Other
NCU00999	-0.159581	1	0.667536	27.9283	29.6828	Other
NCU01000	0.160554	1	0.705048	34.9375	29.6833	Other
NCU01001	0.0761173	1	0.872585	36.5487	32.7523	Other
NCU01002	0.103442	1	0.868846	34.9205	30.7308	Other
NCU01003	-0.338091	1	0.586634	11.1576	13.3869	Other
NCU01004	0.00520486	1	1	24.7455	23.3803	Other
NCU01005	-0.309656	1	0.419259	21.7859	25.6396	Other
NCU01006	0.0340018	1	1	28.8611	26.7532	Other
NCU01007	0.298525	1	0.444512	33.7377	25.9212	Other
NCU01008	0.0370731	1	0.980469	31.8749	29.3343	Other
NCU01009	0.207442	1	0.542698	42.2987	34.6848	Other
NCU01010	-0.663246	1	0.0620454	21.9352	32.8291	Other
NCU01011	0.440096	1	0.116774	50.5316	35.0828	Other
NCU01012	0.384067	1	0.273403	41.8516	30.394	Other
NCU01013	0.140426	1	0.802314	30.9431	26.6258	Other
NCU01014	0.171895	1	0.616	38.0596	32.0461	Other
NCU01015	0.0729379	1	0.923371	33.0371	29.7397	Other
NCU01016	0.229241	1	0.588549	33.0472	26.6912	Other
NCU01017	0.181789	1	0.681189	30.1392	25.1793	Other
NCU01019	0.0628542	1	0.979067	27.4682	24.9433	Other
NCU01021	-0.0280549	1	1	22.4891	21.7156	Other
NCU01022	0.232961	1	0.49495	33.9119	27.3274	Other
NCU01023	0.14735	1	0.795415	29.2367	24.967	Other
NCU01024	0.0413515	1	0.979445	28.2813	26.181	Other
NCU01025	0.380765	1	0.305705	32.0277	23.2784	Other
NCU01026	0.0240102	1	1	31.6498	29.5507	Other
NCU01027	0.350081	1	0.265222	45.8634	33.8822	Other
NCU01032	-0.0370662	1	1	26.8599	26.1495	Other
NCU01033	0.102008	1	0.814247	35.2144	31.0344	Other
NCU01034	-0.478359	1	0.325006	16.9861	22.6775	Other
NCU01036	0.109778	1	0.795415	28.8525	25.3879	Other
NCU01038	0.444698	1	0.251334	33.9941	23.604	Other
NCU01039	0.428512	1	0.238875	36.3986	25.588	Other
NCU01041	0.273371	1	0.465725	36.7672	28.7686	Other
NCU01042	0.295925	1	0.359283	39.3585	30.3158	Other
NCU01043	0.538441	1	0.115976	39.6407	25.8309	Other
NCU01044	-0.0178865	1	1	28.0401	26.9044	Other
NCU01045	-0.20239	1	0.643631	23.9046	26.0359	Other
NCU01047	0.162853	1	0.732629	28.6439	24.2431	Other
NCU01048	0.487985	1	0.174935	39.3307	26.5483	Other
NCU01049	0.40429	1	0.281533	38.5474	27.5208	Other
NCU01050	0.050947	1	1	33.3123	30.436	Other
NCU01051	0.156599	1	0.724247	40.5254	34.4078	Other
NCU01052	0.29452	1	0.411299	35.3708	27.2802	Other
NCU01053	0.165493	1	0.691408	32.1917	27.1806	Other
NCU01054	-0.374948	1	0.277908	27.2029	33.714	Other
NCU01055	-0.192397	1	0.598567	25.6099	27.7089	Other
NCU01056	-0.587935	1	0.102472	22.5533	32.2056	Other
NCU01057	0.0648664	1	0.98188	36.9243	33.3343	Other
NCU01058	0.555733	1	0.0648408	46.7314	30.1243	Other
NCU01059	0.380044	1	0.312175	37.9298	27.5891	Other
NCU01060	-0.322434	1	0.360863	29.8367	35.305	Other
NCU01061	0.414608	1	0.205529	44.3114	31.5342	Other
NCU01063	-0.144476	1	0.672798	29.4192	30.6768	Other
NCU01064	-0.0302143	1	1	33.8299	32.8449	Other
NCU01065	-0.198241	1	0.62344	29.3053	31.878	Other
NCU01066	-0.0537461	1	0.961816	32.5007	32.0115	Other
NCU01067	-0.0504292	1	0.961212	31.4013	30.7996	Other
NCU01068	0.0361783	1	1	31.0103	28.6786	Other
NCU01069	-0.221491	1	0.519435	28.4002	31.4321	Other
NCU01070	-0.275567	1	0.504951	26.2059	30.1512	Other
NCU01071	-0.194339	1	0.576753	30.2776	32.7895	Other
NCU01072	-0.765229	1	0.0488402	17.3779	28.0417	Other
NCU01073	-0.550524	1	0.173995	18.828	26.1675	Other
NCU01074	-0.99365	1	0.0057607	17.8875	33.9236	Other
NCU01075	-0.438983	1	0.30117	22.2379	28.5471	Other
NCU01076	-0.746181	1	0.0461444	20.7449	32.4629	Other
NCU01077	-0.268443	1	0.504951	26.5818	30.2633	Other
NCU01078	-0.553934	1	0.145589	21.0389	29.3232	Other
NCU01079	-0.360929	1	0.256063	32.5076	39.6415	Other
NCU01080	0.0750966	1	0.979067	27.4286	24.7087	Other
NCU01081	-0.0250486	1	0.964464	37.6222	36.3048	Other
NCU01082	0.0776919	1	0.923371	33.0166	29.5228	Other
NCU01083	0.0172604	1	1	31.8666	29.863	Other
NCU01084	-0.0440449	1	0.960578	30.2739	29.579	Other
NCU01085	-0.0486956	1	1	29.0179	28.4673	Other
NCU01086	0.00348911	1	1	32.8479	31.0674	Other
NCU01087	0.915702	1	0.0074948	42.484	21.1481	Other
NCU01088	-0.0612877	1	0.899629	29.1427	28.7414	Other
NCU01089	0.33353	1	0.357779	33.4953	25.1347	Other
NCU01090	-0.00753801	1	1	28.5147	27.1791	Other
NCU01091	0.391201	1	0.281533	38.17	27.4722	Other
NCU01092	-0.0434778	1	0.958472	27.2693	26.6492	Other
NCU01093	-0.287254	1	0.378992	27.2007	31.5304	Other
NCU01094	0.159939	1	0.663707	37.9121	32.0685	Other
NCU01095	-0.143957	1	0.691596	33.1653	34.6794	Other
NCU01096	-0.257081	1	0.76976	12.9872	14.9292	Other
NCU01097	-0.0909441	1	0.894049	25.8982	26.1679	Other
NCU01098	0.159459	1	0.686423	31.1898	26.4603	Other
NCU01099	0.289488	1	0.420604	30.3594	23.5524	Other
NCU01100	0.154476	1	0.795415	29.0916	24.7677	Other
NCU01101	-0.0968881	1	0.804482	36.1573	36.6837	Other
NCU01102	0.101427	1	0.808558	33.2011	29.2703	Other
NCU01103	0.0785706	1	0.925651	35.1709	31.6318	Other
NCU01104	-0.0243383	1	1	28.9822	27.9388	Other
NCU01105	0.115751	1	0.760966	35.8453	31.3331	Other
NCU01106	0.00416435	1	1	34.633	32.6738	Other
NCU01107	0.133186	1	0.760966	35.5693	30.6568	Other
NCU01108	-0.0513446	1	0.961816	32.8855	32.2617	Other
NCU01109	-0.0450512	1	0.902893	31.0878	30.4589	Other
NCU01111	0.451347	1	0.187502	41.3814	28.6475	Other
NCU01112	0.0684695	1	0.866848	33.635	30.2637	Other
NCU01113	0.157384	1	0.713197	37.1725	31.6838	Other
NCU01114	0.0867515	1	0.864756	32.7165	29.0285	Other
NCU01115	-0.151628	1	0.699857	35.1541	36.9841	Other
NCU01116	-0.0866849	1	0.894049	25.9829	26.1349	Other
NCU01118	-0.131681	1	0.793077	32.0446	33.2199	Other
NCU01119	0.00537623	1	1	28.6024	27.0417	Other
NCU01120	0.413439	1	0.253207	38.7361	27.4927	Other
NCU01121	-0.0931844	1	0.793077	32.1231	32.4712	Other
NCU01122	0.13405	1	0.805511	32.3064	27.8643	Other
NCU01123	0.312812	1	0.436869	32.6141	24.8502	Other
NCU01124	-0.0124994	1	1	29.5632	28.2184	Other
NCU01127	-0.413061	1	0.271345	22.9693	29.0451	Other
NCU01132	0.354943	1	0.345196	37.4715	27.6618	Other
NCU01134	0.418424	1	0.203172	40.0329	28.3048	Other
NCU01135	0.158972	1	0.741734	30.7234	26.1105	Other
NCU01136	-0.0430526	1	0.960578	30.5754	29.9162	Other
NCU01138	0.400357	1	0.251334	34.3382	24.4897	Other
NCU01140	0.152411	1	0.753802	33.8112	28.7929	Other
NCU01141	-0.0577605	1	0.902893	31.1479	30.7134	Other
NCU01142	-0.0155689	1	1	29.2123	27.8884	Other
NCU01143	0.179551	1	0.681189	29.8759	25.0076	Other
NCU01144	0.0652126	1	0.91952	29.9088	27.095	Other
NCU01145	0.0329286	1	0.980145	30.6192	28.4354	Other
NCU01146	-0.113687	1	0.786572	30.2202	30.9949	Other
NCU01147	-0.111634	1	0.793077	32.2892	33.0624	Other
NCU01148	-0.281795	1	0.415443	26.5011	30.511	Other
NCU01149	-0.335374	1	0.379835	22.6472	27.0522	Other
NCU01150	-0.0210856	1	1	26.838	25.8351	Other
NCU01151	0.227909	1	0.51454	37.0967	29.973	Other
NCU01153	-0.437653	1	0.37852	14.227	18.4598	Other
NCU01154	-0.125475	1	0.771479	25.9112	26.8213	Other
NCU01156	0.219841	1	0.546958	34.6896	28.1454	Other
NCU01157	0.0280447	1	1	29.916	27.7822	Other
NCU01158	0.0758989	1	0.920868	31.2208	28.0325	Other
NCU01159	-0.544211	1	0.222763	15.4386	21.3247	Other
NCU01160	-0.102905	1	0.894049	25.7485	26.2405	Other
NCU01161	-0.163735	1	0.71532	26.4196	28.0852	Other
NCU01162	0.32166	1	0.35235	38.2154	28.9509	Other
NCU01163	0.153394	1	0.696163	33.0268	28.0602	Other
NCU01164	0.0208701	1	1	26.4114	24.6389	Other
NCU01165	0.0149899	1	1	25.7113	24.1528	Other
NCU01166	-0.12497	1	0.839345	28.4462	29.4059	Other
NCU01167	-0.336485	1	0.362054	24.9533	29.861	Other
NCU01169	0.123129	1	0.760966	35.5325	30.9672	Other
NCU01170	-0.0101131	1	1	32.3574	30.793	Other
NCU01171	0.106725	1	0.811467	34.2536	30.1937	Other
NCU01172	0.116481	1	0.857835	29.4545	25.7434	Other
NCU01173	0.0992005	1	0.876022	38.9933	34.3971	Other
NCU01174	-0.013846	1	1	30.0492	28.7712	Other
NCU01175	-0.147323	1	0.77555	26.6683	28.07	Other
NCU01176	-0.0423023	1	0.959912	29.2865	28.6177	Other
NCU01177	-0.320664	1	0.394686	28.8379	34.1388	Other
NCU01178	0.0136046	1	1	31.5135	29.5724	Other
NCU01179	-0.119928	1	0.7899	31.0104	31.9407	Other
NCU01180	-0.11817	1	0.73741	31.639	32.6128	Other
NCU01181	-0.0464592	1	0.905858	33.3278	32.5692	Other
NCU01182	-0.000440276	1	1	32.2758	30.5337	Other
NCU01183	0.118843	1	0.862562	31.7381	27.6402	Other
NCU01184	0.0760618	1	0.872585	36.6486	32.8832	Other
NCU01185	-0.0702479	1	0.80705	37.5843	37.296	Other
NCU01186	0.0592983	1	0.979445	28.6595	26.0187	Other
NCU01187	0.152395	1	0.7373	29.3308	25.0463	Other
NCU01188	-0.136561	1	0.762624	23.7056	24.7721	Other
NCU01189	-0.00299086	1	1	31.3464	29.759	Other
NCU01190	0.0185958	1	1	29.1664	27.3206	Other
NCU01191	-0.336185	1	0.452234	20.5422	24.6159	Other
NCU01192	0.00899425	1	1	31.5567	29.7666	Other
NCU01193	0.0108867	1	1	30.277	28.465	Other
NCU01195	-0.313576	1	0.437859	24.0813	28.4482	Other
NCU01196	-0.1553	1	0.771479	25.8301	27.2957	Other
NCU01197	-0.0313868	1	1	23.7482	23.0162	Other
NCU01198	-0.0487987	1	0.962945	34.7489	34.0718	Other
NCU01199	-0.0337952	1	0.962393	33.7852	32.6879	Other
NCU01200	-0.261844	1	0.445649	30.7534	34.9553	Other
NCU01201	-0.108599	1	0.839345	28.5317	29.2304	Other
NCU01202	-0.159741	1	0.672798	29.0581	30.7291	Other
NCU01203	-0.0591136	1	0.859522	38.0515	37.432	Other
NCU01204	-0.145842	1	0.71532	26.3838	27.7754	Other
NCU01205	-0.177308	1	0.593851	33.1163	35.3943	Other
NCU01206	-0.0848018	1	0.896011	27.0436	27.2084	Other
NCU01207	-0.184451	1	0.598567	25.7059	27.7046	Other
NCU01208	-0.0837901	1	0.902893	31.1755	31.3567	Other
NCU01209	0.242096	1	0.46288	43.2201	34.6026	Other
NCU01210	0.302777	1	0.358047	45.115	34.5894	Other
NCU01211	-0.0928551	1	0.847004	31.823	32.1597	Other
NCU01212	-0.291749	1	0.32797	34.5908	40.3778	Other
NCU01213	-0.0616161	1	0.911056	37.2449	36.8641	Other
NCU01214	0.0599041	1	0.983424	44.1646	40.0591	Other
NCU01215	-0.144091	1	0.733403	30.2712	31.7632	Other
NCU01216	-0.248664	1	0.550205	26.1187	29.4306	Other
NCU01218	-0.109388	1	0.83355	26.7465	27.3368	Other
NCU01219	-0.229228	1	0.477609	29.1712	32.4167	Other
NCU01220	-0.22211	1	0.584135	23.2525	25.808	Other
NCU01221	-0.105106	1	0.786572	29.9087	30.5906	Other
NCU01223	-0.300973	1	0.293205	39.09	45.2977	Other
NCU01224	-0.145498	1	0.724806	28.1882	29.6557	Other
NCU01225	-0.218284	1	0.519435	28.5804	31.4937	Other
NCU01227	-0.129445	1	0.7899	30.8086	31.9528	Other
NCU01229	-0.0575276	1	0.905858	32.98	32.4618	Other
NCU01230	0.201613	1	0.580561	40.975	33.6874	Other
NCU01231	0.156867	1	0.713197	37.2511	31.6549	Other
NCU01233	0.160751	1	0.634407	42.5282	36.0393	Other
NCU01234	-0.138265	1	0.682613	31.1078	32.4687	Other
NCU01235	-0.0454045	1	1	29.0312	28.4048	Other
NCU01236	-0.127953	1	0.748428	34.7313	35.9035	Other
NCU01238	-0.0329577	1	0.956865	25.6563	24.9143	Other
NCU01240	-0.201213	1	0.643631	23.9549	26.084	Other
NCU01241	-0.16494	1	0.662013	27.1708	28.8987	Other
NCU01242	-0.0722944	1	0.847004	31.7217	31.6323	Other
NCU01243	-0.0452464	1	0.896011	27.1336	26.5649	Other
NCU01245	-0.111538	1	0.836524	27.4881	28.2494	Other
NCU01246	-0.217139	1	0.557305	27.0688	29.8913	Other
NCU01247	-0.0356864	1	1	26.0945	25.3519	Other
NCU01248	0.201239	1	0.605691	35.9259	29.5772	Other
NCU01249	-0.23807	1	0.557305	27.0033	30.2083	Other
NCU01250	0.0990256	1	0.872585	36.494	32.3811	Other
NCU01252	-0.286717	1	0.489087	24.3696	28.187	Other
NCU01253	-0.108221	1	0.842024	29.6696	30.3499	Other
NCU01254	0.104809	1	0.802314	30.9094	27.2443	Other
NCU01255	0.0813006	1	0.913349	25.9791	23.2561	Other
NCU01256	-0.157533	1	0.662013	27.0664	28.6664	Other
NCU01257	-0.212044	1	0.570556	29.3604	32.1061	Other
NCU01258	-0.178186	1	0.634263	31.3064	33.6395	Other
NCU01259	-0.138478	1	0.73741	31.7575	33.164	Other
NCU01260	0.251509	1	0.47228	37.5423	29.8721	Other
NCU01261	0.239359	1	0.51454	37.2318	29.846	Other
NCU01262	0.254094	1	0.508263	36.4632	28.7673	Other
NCU01266	-0.101508	1	0.842024	29.7512	30.2561	Other
NCU01267	-0.149206	1	0.724806	28.2885	29.7543	Other
NCU01268	-0.244288	1	0.497205	25.7021	28.851	Other
NCU01269	-0.119513	1	0.836524	27.307	28.0942	Other
NCU01270	-0.143635	1	0.661879	37.68	39.4678	Other
NCU01271	-0.124171	1	0.767178	25.1341	25.966	Other
NCU01272	-0.0265076	1	1	24.9324	24.0738	Other
NCU01273	-0.0615834	1	0.847004	31.7691	31.4191	Other
NCU01274	-0.0842295	1	0.897868	27.8041	27.9693	Other
NCU01275	-0.000751136	1	1	31.9145	30.196	Other
NCU01276	-0.0203992	1	1	32.7008	31.3412	Other
NCU01277	0.0702315	1	0.918102	28.7875	25.9703	Other
NCU01278	0.0541675	1	0.920868	30.8286	28.1387	Other
NCU01279	-0.0804733	1	0.90441	32.1968	32.2231	Other
NCU01281	0.101229	1	0.826509	40.2682	35.5461	Other
NCU01282	-0.0292318	1	1	31.2114	30.1872	Other
NCU01283	-0.206148	1	0.692978	22.4495	24.5629	Other
NCU01284	0.164265	1	0.741734	30.5693	25.8946	Other
NCU01285	0.0645816	1	0.925651	35.1863	31.8746	Other
NCU01288	0.0346013	1	0.979445	28.5302	26.4243	Other
NCU01289	-0.147025	1	0.724806	28.4987	29.8958	Other
NCU01290	-0.259833	1	0.497205	25.2459	28.7455	Other
NCU01291	0.000570911	1	1	27.6878	26.2371	Other
NCU01292	-0.238116	1	0.504032	33.2415	37.0362	Other
NCU01294	0.13778	1	0.811467	34.3465	29.5477	Other
NCU01296	-0.240771	1	0.4978	32.2226	36.1559	Other
NCU01297	-0.311267	1	0.353224	28.4002	33.4584	Other
NCU01298	-0.0676583	1	0.909838	36.0131	35.6899	Other
NCU01299	-0.429699	1	0.236255	25.5234	32.9771	Other
NCU01300	-0.150922	1	0.733403	30.5535	32.1145	Other
NCU01301	-0.0641076	1	0.963473	35.593	35.1204	Other
NCU01302	-0.249311	1	0.452508	31.5557	35.5404	Other
NCU01303	0.00185987	1	1	35.1761	33.264	Other
NCU01304	0.0911873	1	0.857835	29.203	26.0271	Other
NCU01305	-0.145331	1	0.78308	29.0144	30.3576	Other
NCU01306	-0.0783394	1	0.847004	31.3974	31.4068	Other
NCU01307	0.0189012	1	1	33.3637	31.1657	Other
NCU01308	-0.12711	1	0.942666	14.1442	14.7197	Other
NCU01309	0.0259874	1	0.980145	30.4568	28.3444	Other
NCU01310	-0.0872644	1	0.786572	30.2112	30.4494	Other
NCU01311	0.111408	1	0.826509	40.4123	35.3712	Other
NCU01312	-0.0784738	1	0.907243	34.1683	34.1371	Other
NCU01313	-0.743581	1	0.166408	11.2053	17.8703	Other
NCU01314	-0.664889	1	0.0866253	17.7748	26.9917	Other
NCU01315	0.0698034	1	0.980469	31.6863	28.61	Other
NCU01317	0.0334724	1	1	29.0916	27.0377	Other
NCU01318	0.0186266	1	1	26.3635	24.6823	Other
NCU01319	-0.00329883	1	1	26.1235	24.8766	Other
NCU01320	-0.151864	1	0.634263	31.7906	33.4234	Other
NCU01321	-0.0317001	1	0.912226	38.4297	37.1772	Other
NCU01322	-0.110819	1	0.830407	25.3736	25.8951	Other
NCU01323	-0.0394256	1	1	24.8684	24.2653	Other
NCU01324	-0.0739323	1	0.851541	33.5901	33.5329	Other
NCU01325	0.342809	1	0.279811	42.5175	31.7732	Other
NCU01326	0.169757	1	0.630053	40.7643	34.726	Other
NCU01327	0.246613	1	0.568966	30.1263	24.032	Other
NCU01328	-0.0962383	1	0.836524	27.2009	27.6148	Other
NCU01329	-0.0794182	1	0.908568	34.8807	34.9869	Other
NCU01330	0.142172	1	0.753802	33.3602	28.6372	Other
NCU01331	-0.164872	1	0.644205	34.0021	36.0111	Other
NCU01332	-0.0202605	1	1	30.1023	28.911	Other
NCU01333	0.0775901	1	0.916606	27.9952	25.1672	Other
NCU01334	-0.404954	1	0.323759	20.6555	26.0591	Other
NCU01335	0.192093	1	0.633228	31.6117	26.2339	Other
NCU01336	-0.0811811	1	0.902893	30.9685	31.0631	Other
NCU01337	0.102275	1	0.776457	40.7941	35.9921	Other
NCU01338	-0.0111288	1	1	34.6581	33.0924	Other
NCU01339	0.134866	1	0.757463	34.6998	29.8743	Other
NCU01340	-0.00814802	1	1	30.1385	28.8672	Other
NCU01341	0.048554	1	0.979804	29.7319	27.1882	Other
NCU01342	-0.0608925	1	0.907243	34.3617	33.9718	Other
NCU01343	0.206327	1	0.559036	36.704	30.1105	Other
NCU01344	-0.0746061	1	0.836524	27.6825	27.5727	Other
NCU01345	-0.146212	1	0.771479	25.8154	27.0252	Other
NCU01346	-0.865322	1	0.134593	8.85498	15.6392	Other
NCU01347	-0.148708	1	0.744911	33.6593	35.2628	Other
NCU01348	-0.021734	1	1	34.0416	32.7476	Other
NCU01349	0.225339	1	0.568966	30.2151	24.4538	Other
NCU01350	-0.272411	1	0.470325	28.083	32.1695	Other
NCU01351	-0.0579366	1	0.960578	30.2004	29.9342	Other
NCU01353	0.020239	1	1	28.2041	26.3426	Other
NCU01355	0.118324	1	0.764322	36.5438	31.8467	Other
NCU01356	-0.198347	1	0.656205	26.1544	28.4717	Other
NCU01357	0.0390382	1	1	41.4353	38.2412	Other
NCU01358	0.310373	1	0.451857	34.873	26.6099	Other
NCU01360	-0.0764535	1	0.855696	35.5603	35.5939	Other
NCU01361	0.0387736	1	0.979804	29.3075	27.0367	Other
NCU01362	-0.12477	1	0.779412	28.1427	29.0698	Other
NCU01364	-0.0511102	1	0.960578	30.2985	29.8075	Other
NCU01365	0.161686	1	0.659151	36.4491	30.8815	Other
NCU01366	-0.0627484	1	0.957691	26.6551	26.3736	Other
NCU01367	0.128457	1	0.802314	30.7876	26.7355	Other
NCU01368	-0.177106	1	0.617656	28.6707	30.6261	Other
NCU01369	-0.0823249	1	0.894049	25.8565	25.9668	Other
NCU01370	-0.274966	1	0.438531	29.813	34.1433	Other
NCU01371	0.0564962	1	0.930565	40.2048	36.5004	Other
NCU01373	0.367799	1	0.25922	44.3236	32.6034	Other
NCU01374	-0.00808816	1	1	37.7361	35.8583	Other
NCU01375	-0.29912	1	0.428782	23.3819	26.8894	Other
NCU01376	0.402207	1	0.240392	41.4669	29.6586	Other
NCU01377	-0.023661	1	1	30.8299	29.7824	Other
NCU01378	0.0915194	1	0.808558	33.0342	29.3691	Other
NCU01379	0.00990499	1	1	27.0689	25.4983	Other
NCU01380	-0.373441	1	0.24246	30.6629	37.5863	Other
NCU01381	-0.0498625	1	0.912226	38.5453	37.6925	Other
NCU01382	-0.0724931	1	0.847004	31.6076	31.4849	Other
NCU01383	-0.539148	1	0.18364	19.4739	27.1856	Other
NCU01385	-0.39003	1	0.477981	12.8739	16.4317	Other
NCU01386	0.145873	1	0.757463	34.6659	29.7217	Other
NCU01387	0.106642	1	0.866848	33.7183	29.6534	Other
NCU01388	0.114932	1	0.864756	32.7031	28.5711	Other
NCU01389	-0.299154	1	0.407105	25.6348	29.9295	Other
NCU01390	-0.082693	1	0.905858	33.2082	33.2064	Other
NCU01391	-0.147869	1	0.661879	37.812	39.6769	Other
NCU01392	-0.861788	1	0.0668439	11.4604	19.9836	Other
NCU01393	-0.297741	1	0.360863	29.6748	34.6918	Other
NCU01394	0.239033	1	0.559036	36.9077	29.5724	Other
NCU01395	-0.172759	1	0.672798	29.1776	31.1539	Other
NCU01396	-0.219668	1	0.636813	15.383	17.0818	Other
NCU01397	-0.0782423	1	0.801808	35.4081	35.3224	Other
NCU01398	-0.144371	1	0.682613	31.2936	32.7662	Other
NCU01399	-0.219952	1	0.576753	30.0952	33.2237	Other
NCU01400	-0.284603	1	0.470325	27.8383	32.0955	Other
NCU01401	-0.115335	1	0.842024	29.2478	30.1079	Other
NCU01402	0.108139	1	0.76754	37.7193	33.0817	Other
NCU01403	-0.00600746	1	1	30.2127	28.7355	Other
NCU01404	0.148967	1	0.764322	36.8412	31.4804	Other
NCU01407	0.281893	1	0.420051	42.9209	33.4191	Other
NCU01408	0.0493136	1	0.920868	30.841	28.2584	Other
NCU01409	0.000881181	1	1	27.9614	26.5095	Other
NCU01410	0.058473	1	0.91952	29.9731	27.2507	Other
NCU01411	-0.0118318	1	1	39.5877	37.8127	Other
NCU01412	0.143942	1	0.795415	28.9246	24.7903	Other
NCU01413	0.0590921	1	0.979067	27.5117	25.0405	Other
NCU01414	-0.180426	1	0.656205	26.0441	27.942	Other
NCU01415	-0.975307	1	0.0492856	9.59119	18.0338	Other
NCU01416	-0.750981	1	0.131204	10.5945	16.9779	Other
NCU01417	-0.150261	1	0.699857	35.1555	36.9476	Other
NCU01418	-0.0099204	1	1	26.8131	25.5731	Other
NCU01419	0.188418	1	0.594508	34.1239	28.3664	Other
NCU01420	0.00964196	1	1	31.7821	30.0275	Other
NCU01421	-0.0697072	1	0.853663	34.8112	34.649	Other
NCU01422	-0.191747	1	0.598567	25.466	27.6138	Other
NCU01423	-0.386256	1	0.228179	28.7291	35.5203	Other
NCU01424	-0.254367	1	0.584135	23.2064	26.2718	Other
NCU01425	-0.112294	1	0.7899	31.0739	31.8089	Other
NCU01426	0.22542	1	0.588549	33.1438	26.8541	Other
NCU01427	-0.213108	1	0.591542	24.379	26.8082	Other
NCU01428	-0.627757	1	0.120212	17.7889	26.0682	Other
NCU01429	0.0054255	1	1	31.0489	29.3114	Other
NCU01430	0.0551405	1	0.923371	33.0093	29.9972	Other
NCU01431	-0.0653267	1	0.894049	25.9981	25.7697	Other
NCU01432	-0.215833	1	0.484605	30.3553	33.4101	Other
NCU01433	-0.164532	1	0.677817	29.843	31.7269	Other
NCU01434	-0.475648	1	0.189259	23.472	30.8876	Other
NCU01435	-0.110281	1	0.847004	31.5166	32.2594	Other
NCU01436	-0.117513	1	0.799022	34.0618	34.9479	Other
NCU01438	-0.238987	1	0.636805	22.741	25.5438	Other
NCU01439	-0.0298758	1	1	24.4834	23.6444	Other
NCU01440	-0.0733506	1	0.896011	26.9	26.8505	Other
NCU01441	-0.040911	1	1	35.1316	34.1109	Other
NCU01442	-0.127425	1	0.793077	32.0241	33.1523	Other
NCU01443	-0.0859966	1	0.90441	32.1292	32.3289	Other
NCU01444	-0.226439	1	0.611598	27.4418	30.4396	Other
NCU01445	0.0560916	1	0.927739	37.3998	34.049	Other
NCU01446	-0.207622	1	0.605243	26.2956	28.8847	Other
NCU01447	-0.152024	1	0.682613	31.117	32.8009	Other
NCU01448	-0.546685	1	0.305773	12.3183	17.3279	Other
NCU01449	-0.217935	1	0.576753	29.8149	32.8729	Other
NCU01450	-0.347547	1	0.563015	14.3615	17.5347	Other
NCU01451	-0.317573	1	0.454805	25.8481	30.4737	Other
NCU01452	-0.193948	1	0.605243	26.4702	28.6802	Other
NCU01453	-0.491521	1	0.216097	20.2512	26.985	Other
NCU01454	-0.0281808	1	1	32.2048	31.214	Other
NCU01455	0.255939	1	0.458922	35.6587	28.3212	Other
NCU01456	-0.237681	1	0.550205	26.0718	29.1901	Other
NCU01457	-0.246682	1	0.52622	29.6478	33.3438	Other
NCU01458	-0.0628799	1	0.961816	32.4503	32.0511	Other
NCU01459	-0.191411	1	0.710194	25.2784	27.3399	Other
NCU01460	-0.110707	1	0.733403	30.8529	31.4557	Other
NCU01461	0.0324864	1	1	28.881	26.7934	Other
NCU01462	0.146295	1	0.709208	36.3481	31.0277	Other
NCU01463	0.115932	1	0.860259	30.7972	26.8516	Other
NCU01464	0.0181231	1	1	34.1318	31.9339	Other
NCU01465	-0.0112634	1	1	28.5134	27.2656	Other
NCU01466	-0.0155355	1	1	26.1042	25.02	Other
NCU01467	-0.0106078	1	1	31.7908	30.3537	Other
NCU01468	0.237641	1	0.533836	32.4747	26.123	Other
NCU01469	0.116927	1	0.753802	33.6779	29.3615	Other
NCU01470	-0.0710854	1	0.83355	26.7661	26.6114	Other
NCU01471	-0.0384325	1	1	33.9062	33.0139	Other
NCU01472	0.257314	1	0.438829	39.0763	30.9259	Other
NCU01473	0.174767	1	0.700704	34.2563	28.7666	Other
NCU01474	-0.140326	1	0.836524	27.2423	28.4752	Other
NCU01475	0.141058	1	0.741734	30.3364	26.0712	Other
NCU01476	-0.214234	1	0.611598	27.5589	30.2952	Other
NCU01477	-0.00984101	1	1	25.909	24.7241	Other
NCU01478	-0.0745633	1	0.894049	25.925	25.871	Other
NCU01479	0.082941	1	0.978666	26.6121	23.8212	Other
NCU01480	0.00399041	1	1	30.7435	29.0212	Other
NCU01481	-0.124231	1	0.83355	26.1948	27.1047	Other
NCU01483	-0.715779	1	0.0358869	21.5047	33.5313	Other
NCU01484	-0.137773	1	0.830407	25.3259	26.4152	Other
NCU01485	0.0927117	1	0.864756	32.4517	28.772	Other
NCU01486	0.102606	1	0.915024	27.1768	24.0217	Other
NCU01487	0.0268427	1	1	33.0118	30.6176	Other
NCU01488	-0.348688	1	0.550266	13.8455	16.6877	Other
NCU01489	-0.305295	1	0.419259	21.9099	25.6528	Other
NCU01490	-0.132921	1	0.741242	32.9712	34.1681	Other
NCU01491	0.203467	1	0.649456	34.6017	28.4829	Other
NCU01493	0.0607002	1	0.926717	35.9686	32.675	Other
NCU01494	0.0933801	1	0.870756	35.5094	31.5055	Other
NCU01495	0.134656	1	0.764322	36.6764	31.6236	Other
NCU01496	0.253135	1	0.457154	42.0497	33.4303	Other
NCU01498	0.00965099	1	1	25.8074	24.317	Other
NCU01499	0.149291	1	0.681189	29.781	25.4594	Other
NCU01500	-0.142804	1	0.667536	28.1951	29.4994	Other
NCU01501	0.230999	1	0.540537	33.5058	27.0503	Other
NCU01502	-0.0262515	1	1	31.4563	30.3439	Other
NCU01503	-0.191915	1	0.656205	25.8851	28.0183	Other
NCU01504	-0.241567	1	0.477609	29.1046	32.67	Other
NCU01505	-0.372614	1	0.256063	32.5933	40.0176	Other
NCU01506	0.0721917	1	0.928719	38.0603	34.2919	Other
NCU01509	0.00222126	1	1	25.6148	24.232	Other
NCU01510	0.00265713	1	1	30.4203	28.7822	Other
NCU01511	-0.0152856	1	1	26.3514	25.2499	Other
NCU01512	-0.00075946	1	1	31.4779	29.7675	Other
NCU01514	-0.0768076	1	0.897868	27.9077	27.8852	Other
NCU01515	-0.0271216	1	1	32.1189	31.0462	Other
NCU01516	-0.0440087	1	0.961816	32.606	31.8217	Other
NCU01517	0.120229	1	0.811467	33.9791	29.5709	Other
NCU01519	-0.237961	1	0.625992	14.3435	16.1184	Other
NCU01520	-0.460385	1	0.219681	23.9277	31.4406	Other
NCU01521	-0.00032337	1	1	34.8667	32.8596	Other
NCU01522	0.120795	1	0.77063	38.5494	33.5835	Other
NCU01523	-0.087301	1	0.836524	27.3941	27.5684	Other
NCU01524	-0.135017	1	0.73741	31.5035	32.8619	Other
NCU01525	0.0333117	1	0.980469	31.6707	29.3042	Other
NCU01526	-0.177656	1	0.650087	24.7968	26.8146	Other
NCU01527	0.243877	1	0.533836	32.4732	25.9665	Other
NCU01528	-0.527988	1	0.18364	19.6531	26.8862	Other
NCU01529	-0.0894994	1	0.887422	22.9678	23.3058	Other
NCU01530	0.357276	1	0.25922	44.3541	32.7505	Other
NCU01531	0.609125	1	0.0779897	41.4315	25.6733	Other
NCU01532	0.594111	1	0.0779897	41.3736	25.969	Other
NCU01534	0.1837	1	0.644288	33.3566	27.8288	Other
NCU01535	0.00528568	1	1	27.9889	26.4389	Other
NCU01536	-0.670129	1	0.151153	14.4218	21.4169	Other
NCU01539	0.0528118	1	0.979445	28.6563	26.1746	Other
NCU01540	0.0558465	1	0.979804	29.4968	26.864	Other
NCU01541	-0.299907	1	0.378992	27.0588	31.7222	Other
NCU01542	0.105834	1	0.866848	33.7961	29.7887	Other
NCU01543	-0.0885706	1	0.896011	27.1274	27.3821	Other
NCU01545	-0.210829	1	0.557305	27.0618	29.7725	Other
NCU01546	0.168513	1	0.681189	29.9669	25.2706	Other
NCU01547	-0.0312326	1	1	29.3061	28.4393	Other
NCU01548	-0.220718	1	0.47167	34.5335	38.2361	Other
NCU01549	0.179887	1	0.705048	35.2576	29.4765	Other
NCU01550	-0.123239	1	0.771479	25.9797	26.8658	Other
NCU01551	-0.0519419	1	0.962945	34.4703	33.8917	Other
NCU01552	-0.124031	1	0.793077	32.0211	33.0269	Other
NCU01553	-0.1872	1	0.639336	32.5039	35.111	Other
NCU01554	0.0732426	1	0.916606	27.7683	25.0433	Other
NCU01555	-0.0277581	1	0.962945	34.6256	33.5105	Other
NCU01559	-0.0111789	1	1	27.9997	26.7982	Other
NCU01560	-0.0651913	1	1	22.6504	22.6224	Other
NCU01561	0.422548	1	0.178875	43.9332	31.0241	Other
NCU01562	-0.106877	1	0.764064	40.0141	40.6176	Other
NCU01563	0.0334248	1	1	33.2982	30.8796	Other
NCU01564	-0.039185	1	1	31.8884	31.0446	Other
NCU01565	0.0999555	1	0.868846	34.8257	30.7755	Other
NCU01566	0.216862	1	0.53203	40.2488	32.7538	Other
NCU01567	0.224381	1	0.540537	33.7355	27.4088	Other
NCU01568	0.177963	1	0.644288	33.3127	27.9027	Other
NCU01569	0.0706991	1	0.980469	31.6711	28.5645	Other
NCU01570	0.266237	1	0.438829	39.016	30.7616	Other
NCU01571	0.0544804	1	0.870756	35.4245	32.3022	Other
NCU01572	0.500175	1	0.137477	39.9156	26.7235	Other
NCU01573	0.669952	1	0.0512876	42.8833	25.5146	Other
NCU01575	-0.079537	1	0.905858	32.8797	32.9441	Other
NCU01577	0.0885196	1	0.816907	36.1098	32.1133	Other
NCU01579	-0.567271	1	0.07758	27.5195	38.6334	Other
NCU01580	0.0152991	1	1	32.7145	30.6722	Other
NCU01581	0.159551	1	0.681189	29.9609	25.4082	Other
NCU01584	0.113589	1	0.857835	29.3205	25.7232	Other
NCU01585	-0.378955	1	0.333947	21.982	27.152	Other
NCU01587	-0.245764	1	0.591542	24.2866	27.3227	Other
NCU01589	0.0690224	1	0.857835	29.406	26.4908	Other
NCU01591	0.466642	1	0.198687	35.0727	23.989	Other
NCU01592	0.54333	1	0.0986385	43.1049	27.877	Other
NCU01593	0.589755	1	0.0798129	38.6909	24.3344	Other
NCU01595	0.185536	1	0.600217	34.977	29.1007	Other
NCU01596	0.187641	1	0.696163	33.0491	27.5154	Other
NCU01597	0.0635246	1	0.918102	29.2451	26.5216	Other
NCU01598	-0.0193684	1	1	34.0723	32.6876	Other
NCU01599	-0.0761468	1	0.958472	27.4576	27.4323	Other
NCU01601	-0.192375	1	0.611598	27.3411	29.5699	Other
NCU01605	0.0223348	1	1	34.9089	32.6049	Other
NCU01606	-0.110213	1	0.896011	26.7712	27.4423	Other
NCU01607	-0.0130469	1	1	28.9054	27.7058	Other
NCU01608	0.410031	1	0.170658	45.9937	32.8233	Other
NCU01610	-0.114583	1	0.882245	20.8773	21.4118	Other
NCU01611	0.206788	1	0.610948	37.024	30.3999	Other
NCU01612	-0.113013	1	0.842024	29.3862	30.1695	Other
NCU01613	0.018434	1	1	34.8277	32.6402	Other
NCU01614	-0.0985978	1	0.796114	33.1573	33.6031	Other
NCU01615	0.317531	1	0.373288	35.6758	27.0478	Other
NCU01620	-0.540565	1	0.102921	24.9237	34.5232	Other
NCU01623	0.0743084	1	0.927739	37.2875	33.5326	Other
NCU01625	0.298781	1	0.444512	33.8152	26.0385	Other
NCU01629	-0.0545237	1	0.963979	36.5558	35.9247	Other
NCU01631	-0.453537	1	0.462324	12.1962	15.9541	Other
NCU01632	-0.00119859	1	1	27.2583	25.884	Other
NCU01633	-0.0860768	1	0.897868	27.9907	28.2314	Other
NCU01634	-0.222265	1	0.538974	31.735	35.0786	Other
NCU01635	-0.0884554	1	0.897868	28.141	28.4006	Other
NCU01636	-0.670347	1	0.0277466	28.1037	42.6544	Other
NCU01637	0.0571769	1	0.92215	32.0393	29.1431	Other
NCU01638	-0.0624232	1	0.957691	26.3673	26.1103	Other
NCU01640	0.0109311	1	1	39.8913	37.4302	Other
NCU01642	-0.0365818	1	1	25.8781	25.1853	Other
NCU01643	-0.00744218	1	1	30.5416	29.1044	Other
NCU01644	0.114946	1	0.802314	31.1948	27.2831	Other
NCU01645	-0.0560203	1	0.894049	26.1009	25.721	Other
NCU01646	0.0447981	1	0.979804	29.4037	27.068	Other
NCU01647	-0.199109	1	0.704781	24.1774	26.3273	Other
NCU01648	-0.212971	1	0.656205	25.8989	28.5033	Other
NCU01649	-0.199215	1	0.582689	31.3075	33.9358	Other
NCU01650	-0.452971	1	0.199418	27.9554	36.2751	Other
NCU01651	-0.196003	1	0.62897	30.4557	33.0999	Other
NCU01652	0.119862	1	0.757463	34.8285	30.3306	Other
NCU01653	-0.456479	1	0.123828	31.6761	41.1961	Other
NCU01654	-0.0268256	1	0.961212	31.785	30.6743	Other
NCU01655	0.0327054	1	1	37.4309	34.6372	Other
NCU01656	-0.147874	1	0.733403	30.4828	32.0041	Other
NCU01657	-0.0570753	1	0.962945	34.578	34.0763	Other
NCU01658	0.181832	1	0.700704	34.0698	28.4669	Other
NCU01659	0.00906362	1	1	28.6159	26.9913	Other
NCU01660	-0.210237	1	0.62344	29.381	32.2385	Other
NCU01664	-0.269856	1	0.445649	30.6957	35.0457	Other
NCU01665	-0.091923	1	0.7899	31.1784	31.4763	Other
NCU01666	0.127868	1	0.805511	31.9291	27.6222	Other
NCU01667	0.00671439	1	1	27.1537	25.6273	Other
NCU01668	-0.0540035	1	0.962393	33.7753	33.2092	Other
NCU01669	0.0703945	1	0.920868	31.0728	28.0023	Other
NCU01670	-0.159105	1	0.662013	27.0921	28.7533	Other
NCU01672	0.279792	1	0.425549	36.9262	28.8119	Other
NCU01673	-0.145518	1	0.779412	27.9891	29.3143	Other
NCU01674	-0.0203798	1	1	29.2444	28.1408	Other
NCU01675	0.0363913	1	0.980145	30.6851	28.376	Other
NCU01678	0.203617	1	0.564725	37.467	30.8295	Other
NCU01679	0.232713	1	0.47228	37.4673	30.1861	Other
NCU01680	-0.167815	1	0.692978	22.5254	24.0275	Other
NCU01681	-0.178181	1	0.856213	13.5601	14.493	Other
NCU01684	-0.346353	1	0.563015	14.321	17.4978	Other
NCU01686	-0.354185	1	0.536337	12.7972	15.6881	Other
NCU01688	-0.0805935	1	0.863058	40.0806	39.8842	Other
NCU01689	-0.257155	1	0.470325	28.1173	31.8929	Other
NCU01692	-0.00728274	1	1	29.9188	28.5515	Other
NCU01695	-0.0320224	1	1	36.0932	34.9495	Other
NCU01696	0.00779567	1	1	37.1872	35.0335	Other
NCU01697	-0.168094	1	0.687201	31.9721	34.0442	Other
NCU01698	-0.0752049	1	0.90441	32.0417	31.9892	Other
NCU01699	0.141981	1	0.757463	34.6397	29.6865	Other
NCU01700	-0.0677312	1	0.894049	26.2086	25.957	Other
NCU01701	-0.0461687	1	0.961816	32.4981	31.8099	Other
NCU01702	0.15468	1	0.686423	30.922	26.3106	Other
NCU01703	0.0994243	1	0.798953	29.7488	26.4	Other
NCU01704	-0.132437	1	0.77555	27.0547	28.1109	Other
NCU01705	0.0987639	1	0.868846	34.6019	30.6265	Other
NCU01706	-0.0224488	1	1	37.2063	35.8028	Other
NCU01713	0.119654	1	0.764322	36.8594	32.1321	Other
NCU01715	0.0837124	1	0.864756	32.4479	28.9192	Other
NCU01717	0.111749	1	0.821902	38.3921	33.6016	Other
NCU01720	-0.0478501	1	1	34.8927	34.1901	Other
NCU01722	-0.0325852	1	1	28.9181	28.0712	Other
NCU01724	-0.0461932	1	1	27.8596	27.2635	Other
NCU01725	-0.277862	1	0.497205	25.5518	29.4303	Other
NCU01728	-0.16716	1	0.704781	24.3659	25.966	Other
NCU01729	-0.0305931	1	0.959912	29.5522	28.6375	Other
NCU01731	-0.16896	1	0.704781	24.6095	26.2415	Other
NCU01734	-0.384917	1	0.348564	19.2644	24.1717	Other
NCU01735	-0.376283	1	0.269878	26.6809	32.8388	Other
NCU01737	-0.00874893	1	1	32.2907	30.8057	Other
NCU01738	-0.241306	1	0.557305	27.0948	30.4222	Other
NCU01739	-0.0387774	1	1	32.9319	32.0627	Other
NCU01740	-0.023471	1	1	40.2307	38.5805	Other
NCU01741	-0.0059674	1	1	29.6731	28.2406	Other
NCU01742	-0.16243	1	0.771479	25.8846	27.5292	Other
NCU01744	0.0473062	1	0.979067	27.6913	25.4129	Other
NCU01745	0.0285325	1	1	32.1687	29.8838	Other
NCU01746	-0.915591	1	0.015274	17.221	30.9425	Other
NCU01747	0.117519	1	0.795415	28.781	25.1641	Other
NCU01748	-0.207387	1	0.605243	26.3058	28.9103	Other
NCU01750	-0.518173	1	0.135979	25.2168	34.0686	Other
NCU01751	0.115424	1	0.724247	40.2691	35.1734	Other
NCU01752	-0.150615	1	0.73741	31.3099	32.9888	Other
NCU01753	0.121863	1	0.795415	28.7218	25.067	Other
NCU01754	-0.295692	1	0.499052	19.9234	23.2294	Other
NCU01756	-0.109544	1	0.847004	31.6336	32.3165	Other
NCU01757	0.120821	1	0.811467	34.3108	29.8786	Other
NCU01758	0.151896	1	0.668085	38.8523	33.09	Other
NCU01759	0.0528437	1	0.982812	40.6873	37.187	Other
NCU01760	0.397425	1	0.205529	44.2774	31.7655	Other
NCU01761	0.132579	1	0.717027	38.4321	33.1978	Other
NCU01762	-0.188765	1	0.588383	32.3011	34.7689	Other
NCU01763	0.155228	1	0.630053	41.3012	35.1129	Other
NCU01764	-0.130446	1	0.665901	39.1224	40.3696	Other
NCU01765	0.134994	1	0.860259	30.7132	26.5309	Other
NCU01766	-0.22059	1	0.52622	29.5978	32.6294	Other
NCU01767	0.0313958	1	0.980777	32.4584	30.1447	Other
NCU01768	-0.189333	1	0.710194	25.3611	27.4614	Other
NCU01769	-0.440286	1	0.236255	25.8212	33.3185	Other
NCU01771	-0.197159	1	0.617656	28.5984	31.099	Other
NCU01772	0.0221295	1	1	34.2312	31.9681	Other
NCU01776	-0.100649	1	0.842024	29.5524	29.9802	Other
NCU01777	-0.0385497	1	1	31.152	30.3089	Other
NCU01779	-0.0598401	1	0.964931	38.4752	38.0197	Other
NCU01780	-0.259899	1	0.519435	28.4991	32.3688	Other
NCU01781	0.0113092	1	1	33.9663	31.9408	Other
NCU01782	-0.0986529	1	0.827079	24.2633	24.6313	Other
NCU01783	-0.245705	1	0.49133	31.0215	34.8983	Other
NCU01784	0.0600835	1	0.981622	35.8371	32.5834	Other
NCU01785	-0.24975	1	0.477609	29.1774	32.8192	Other
NCU01786	-0.238549	1	0.52622	29.5624	33.1082	Other
NCU01788	-0.0170032	1	1	32.2089	30.929	Other
NCU01789	0.0119528	1	1	26.1384	24.6103	Other
NCU01790	-0.107288	1	0.882245	21.168	21.4357	Other
NCU01791	-0.0594404	1	0.960578	30.6064	30.2055	Other
NCU01792	-0.210416	1	0.656205	25.9425	28.4866	Other
NCU01793	-0.142357	1	0.720183	27.6659	28.9405	Other
NCU01794	-0.525358	1	0.0867513	29.7224	40.4049	Other
NCU01795	-0.154084	1	0.71532	26.3029	27.735	Other
NCU01796	0.131247	1	0.757463	34.8991	30.1559	Other
NCU01797	-0.022766	1	1	26.5273	25.5785	Other
NCU01798	0.258262	1	0.431637	45.1043	35.5983	Other
NCU01799	-0.359419	1	0.297962	26.1198	31.7988	Other
NCU01800	0.0962782	1	0.811467	33.9057	30.0408	Other
NCU01801	-0.0364696	1	0.963979	36.3531	35.7722	Other
NCU01802	0.307516	1	0.321092	44.4462	33.994	Other
NCU01803	-0.11617	1	0.77555	26.9517	27.7057	Other
NCU01804	-0.10114	1	0.847004	31.4489	31.9502	Other
NCU01805	-0.123333	1	0.796114	33.173	34.2754	Other
NCU01806	-0.225583	1	0.49133	31.1251	34.5439	Other
NCU01807	0.160121	1	0.675684	29.0013	24.5147	Other
NCU01808	-0.141675	1	0.78308	28.9063	30.2196	Other
NCU01809	0.244081	1	0.445139	40.3243	32.223	Other
NCU01810	0.113974	1	0.866848	33.869	29.6297	Other
NCU01811	-0.461498	1	0.235163	22.5358	29.5109	Other
NCU01812	-0.642496	1	0.0447309	25.9087	38.3896	Other
NCU01813	-0.120693	1	0.729207	29.5518	30.4864	Other
NCU01814	-0.0535543	1	0.90441	32.0601	31.5917	Other
NCU01815	-0.351907	1	0.32863	25.6097	30.9902	Other
NCU01816	0.0177016	1	1	29.6576	27.8329	Other
NCU01817	0.0070286	1	1	27.9227	26.3924	Other
NCU01818	-0.012409	1	1	37.082	35.3807	Other
NCU01819	0.0159388	1	1	37.3389	34.9894	Other
NCU01820	-0.186242	1	0.650087	25.0196	27.0379	Other
NCU01821	-0.201777	1	0.617656	28.4979	31.0543	Other
NCU01822	-0.147537	1	0.720183	27.5245	28.9332	Other
NCU01823	-0.050108	1	1	26.8741	26.3963	Other
NCU01824	-0.191157	1	0.656205	26.0954	28.2657	Other
NCU01826	-0.19966	1	0.62344	29.4822	32.13	Other
NCU01827	-0.146599	1	0.767178	24.9686	26.2682	Other
NCU01828	-0.196303	1	0.599108	34.1167	37.0297	Other
NCU01829	-0.205576	1	0.499616	39.9792	43.4147	Other
NCU01830	0.247845	1	0.420051	42.9802	34.1726	Other
NCU01831	0.0228769	1	0.98188	36.6805	34.2075	Other
NCU01833	0.0838398	1	0.85528	28.3869	25.3952	Other
NCU01834	-0.374529	1	0.477731	17.4592	21.6056	Other
NCU01835	-0.372903	1	0.297962	26.2573	32.154	Other
NCU01837	0.185515	1	0.610948	37.1748	30.8863	Other
NCU01838	0.112884	1	0.760966	35.764	31.2996	Other
NCU01839	-0.0572771	1	0.90441	32.0664	31.6617	Other
NCU01840	0.247595	1	0.480504	32.0911	25.494	Other
NCU01841	-0.343859	1	0.273917	31.5501	37.7118	Other
NCU01842	-0.042543	1	0.959912	29.429	28.7421	Other
NCU01843	0.0263821	1	1	27.8577	25.9484	Other
NCU01844	-0.0634663	1	0.957691	26.3323	26.0787	Other
NCU01845	-0.0405213	1	1	25.0366	24.4449	Other
NCU01846	-0.100958	1	0.954061	22.2505	22.6621	Other
NCU01848	0.137072	1	0.791683	28.1271	24.1579	Other
NCU01849	0.649749	1	0.041078	44.6464	26.9178	Other
NCU01850	0.0190223	1	1	29.6107	27.7103	Other
NCU01851	0.204356	1	0.559036	36.6897	30.1369	Other
NCU01852	0.397565	1	0.246131	37.6447	27.1159	Other
NCU01853	0.416514	1	0.205529	44.1717	31.3764	Other
NCU01854	-0.416298	1	0.30117	22.4219	28.5023	Other
NCU01855	-0.361089	1	0.259462	29.3382	35.6859	Other
NCU01856	-0.163884	1	0.757793	23.1533	24.6123	Other
NCU01857	0.0767051	1	0.920868	31.0929	27.9654	Other
NCU01858	-0.124851	1	0.729207	29.608	30.6181	Other
NCU01859	0.13397	1	0.808558	33.4147	28.7659	Other
NCU01860	-0.0477638	1	0.908568	35.3828	34.595	Other
NCU01861	-0.44474	1	0.261837	21.5774	27.9911	Other
NCU01862	-0.121624	1	0.839345	28.35	29.2095	Other
NCU01863	-0.89014	1	0.0666623	10.272	18.3262	Other
NCU01865	0.321607	1	0.403774	33.9885	25.7791	Other
NCU01866	-0.0552507	1	0.960578	30.6251	30.0752	Other
NCU01867	0.235708	1	0.546958	35.0242	28.0706	Other
NCU01868	0.102238	1	0.92215	32.4196	28.5504	Other
NCU01869	0.0354652	1	1	35.0134	32.4157	Other
NCU01870	-0.28877	1	0.394686	29.214	33.6855	Other
NCU01871	-0.205153	1	0.692978	22.3739	24.4808	Other
NCU01872	-0.579251	1	0.20956	14.2745	20.4255	Other
NCU01873	0.269521	1	0.458922	35.8214	28.1328	Other
NCU01874	0.230112	1	0.508263	36.1693	29.1477	Other
NCU01875	0.555115	1	0.0967757	39.0181	25.1488	Other
NCU01876	-0.12423	1	0.758166	37.5782	38.9034	Other
NCU01877	0.362755	1	0.279811	42.5985	31.3093	Other
NCU01878	0.0153093	1	1	28.7953	27.0244	Other
NCU01879	-0.134848	1	0.71532	26.6694	27.8086	Other
NCU01880	-0.240936	1	0.393525	40.285	45.0897	Other
NCU01881	-0.213524	1	0.636805	22.8283	25.0697	Other
NCU01882	-0.0522647	1	0.896011	27.0551	26.5814	Other
NCU01883	0.0501519	1	1	28.0093	25.6136	Other
NCU01884	0.17959	1	0.659151	36.595	30.5599	Other
NCU01886	-0.202516	1	0.667536	27.7038	30.2813	Other
NCU01888	0.0420819	1	0.981353	34.5148	31.7611	Other
NCU01889	-0.399195	1	0.343707	22.7664	28.5326	Other
NCU01891	-0.510797	1	0.247536	17.5422	23.7156	Other
NCU01893	-0.467624	1	0.2061	19.6143	25.7006	Other
NCU01894	-0.0432938	1	0.959912	29.7308	29.0644	Other
NCU01895	-0.0482677	1	0.896011	27.1095	26.5683	Other
NCU01896	0.11771	1	0.745952	31.4093	27.4351	Other
NCU01897	-0.456857	1	0.241772	20.1587	26.0592	Other
NCU01898	-0.425361	1	0.280525	23.8441	30.3527	Other
NCU01899	-0.349537	1	0.322029	29.1394	35.1776	Other
NCU01900	-0.654168	1	0.0701002	21.3996	32.0218	Other
NCU01901	0.122951	1	0.862562	31.6557	27.5284	Other
NCU01902	-0.459296	1	0.166203	26.3885	34.4592	Other
NCU01903	0.120703	1	0.814247	35.158	30.6414	Other
NCU01904	-0.14665	1	0.682613	31.1835	32.7697	Other
NCU01905	-0.0456629	1	0.961816	32.426	31.7511	Other
NCU01906	-0.384743	1	0.244204	27.2125	33.5382	Other
NCU01907	-0.0111206	1	1	30.7871	29.4262	Other
NCU01908	0.0861745	1	0.857835	29.6324	26.4843	Other
NCU01910	-0.0139114	1	0.960578	30.7856	29.4535	Other
NCU01911	-0.0618544	1	0.891972	24.9542	24.7444	Other
NCU01912	-0.188936	1	0.650087	24.7605	26.7758	Other
NCU01913	0.00737893	1	1	35.199	33.1843	Other
NCU01914	0.166217	1	0.696163	32.9512	27.7941	Other
NCU01916	0.0676114	1	0.92215	32.1987	29.1281	Other
NCU01917	0.121874	1	0.69459	45.8436	39.9033	Other
NCU01918	-0.0125393	1	1	32.3204	30.931	Other
NCU01919	-0.0618461	1	0.894049	25.9869	25.7936	Other
NCU01920	-0.0378227	1	0.961212	31.6462	30.6388	Other
NCU01922	-0.129034	1	0.699857	35.1211	36.3122	Other
NCU01923	-0.563115	1	0.25371	12.404	17.3988	Other
NCU01924	0.00351816	1	1	29.5408	27.8691	Other
NCU01926	-0.0823536	1	0.909838	36.049	36.1185	Other
NCU01927	0.0801072	1	0.857835	29.2168	26.2334	Other
NCU01928	0.0808436	1	0.91952	30.0024	26.8862	Other
NCU01929	0.0617793	1	0.920868	30.7172	27.9563	Other
NCU01930	-0.0687322	1	0.853663	34.8135	34.5402	Other
NCU01931	-0.292574	1	0.437859	23.7822	27.6067	Other
NCU01932	-0.22729	1	0.52622	29.4856	32.7157	Other
NCU01935	-0.260283	1	0.512353	27.4463	31.1468	Other
NCU01936	-0.0642602	1	0.959211	28.6275	28.3889	Other
NCU01938	-0.145771	1	0.78308	28.7945	30.1852	Other
NCU01939	-0.0243214	1	1	25.549	24.6018	Other
NCU01940	-0.188942	1	0.699053	23.1673	25.0641	Other
NCU01942	-0.41856	1	0.425539	13.5838	17.2716	Other
NCU01943	-0.294269	1	0.438531	29.3879	34.2623	Other
NCU01944	-0.180827	1	0.662013	27.0255	29.0057	Other
NCU01945	-0.150858	1	0.682613	31.1641	32.806	Other
NCU01946	-0.772173	1	0.0556117	16.1468	26.9418	Other
NCU01947	-0.0719652	1	0.901301	29.8137	29.7391	Other
NCU01948	-0.222208	1	0.643631	23.8555	26.4082	Other
NCU01949	0.121395	1	0.802314	31.0064	27.0634	Other
NCU01950	0.124387	1	0.753802	33.709	29.3119	Other
NCU01951	0.451947	1	0.167259	41.749	28.8997	Other
NCU01953	-0.0557165	1	0.957691	26.3338	25.9613	Other
NCU01954	-0.122114	1	0.691596	33.3787	34.4529	Other
NCU01955	-0.147356	1	0.71532	26.5904	27.9332	Other
NCU01956	0.071012	1	0.979067	27.679	24.9646	Other
NCU01957	-0.742796	1	0.0614354	17.8522	28.4924	Other
NCU01958	-0.349051	1	0.579623	14.4614	17.82	Other
NCU01959	0.201143	1	0.753046	17.1937	14.3784	Other
NCU01960	0.434071	1	0.448335	19.7143	14.022	Other
NCU01961	0.596638	1	0.0798129	38.8009	24.3415	Other
NCU01962	0.245263	1	0.533836	32.7558	26.1186	Other
NCU01963	0.269401	1	0.465725	36.5707	28.7582	Other
NCU01964	0.000881909	1	1	27.8087	26.3786	Other
NCU01965	0.143055	1	0.795415	28.8281	24.7266	Other
NCU01966	-0.0590557	1	0.955988	24.0387	23.884	Other
NCU01967	-0.125015	1	0.77555	26.6664	27.7051	Other
NCU01968	-0.0144003	1	1	31.705	30.3994	Other
NCU01969	-0.448267	1	0.197428	24.7837	31.9587	Other
NCU01970	-0.431778	1	0.236255	25.9794	33.3039	Other
NCU01971	0.0825161	1	0.864756	32.6408	29.1972	Other
NCU01972	-0.316031	1	0.300607	30.7932	36.3104	Other
NCU01973	0.256751	1	0.445139	40.478	32.0469	Other
NCU01974	-0.0817854	1	0.851541	33.3501	33.5064	Other
NCU01975	-0.0713999	1	0.894049	26.1037	25.9983	Other
NCU01976	0.0665781	1	0.980469	31.8121	28.7794	Other
NCU01977	-0.154729	1	0.71532	26.4104	27.8607	Other
NCU01978	0.0771566	1	0.92966	39.3276	35.3304	Other
NCU01979	0.167796	1	0.625541	39.92	33.7535	Other
NCU01980	0.0578981	1	0.926717	35.9827	32.7659	Other
NCU01981	-0.0532942	1	0.958472	27.6269	27.1646	Other
NCU01982	-0.0363248	1	1	34.1181	33.1762	Other
NCU01983	0.00331466	1	1	31.3507	29.7237	Other
NCU01984	-0.00770738	1	1	26.9765	25.6814	Other
NCU01985	-0.000238494	1	1	28.6904	27.2293	Other
NCU01987	0.0573681	1	0.925651	35.2618	32.0644	Other
NCU01988	0.686008	1	0.0283787	47.5679	27.8044	Other
NCU01989	0.323455	1	0.33295	40.9748	30.9897	Other
NCU01990	0.190375	1	0.600217	35.1303	29.1586	Other
NCU01991	0.153232	1	0.649456	34.4059	29.2972	Other
NCU01992	0.00802649	1	1	25.7743	24.3187	Other
NCU01993	-0.0601959	1	0.902893	31.1167	30.7866	Other
NCU01994	-0.0737568	1	0.956865	25.2283	25.209	Other
NCU01995	0.198581	1	0.542698	42.2416	34.8937	Other
NCU01996	0.222929	1	0.627297	30.303	24.6428	Other
NCU01997	0.000874954	1	1	27.8177	26.3738	Other
NCU01998	0.0224854	1	1	35.101	32.7854	Other
NCU01999	0.010895	1	1	26.6717	25.0475	Other
NCU02000	0.0875157	1	0.879196	41.0029	36.4181	Other
NCU02001	-0.0290183	1	1	39.1305	37.9069	Other
NCU02002	-0.00541378	1	1	33.7867	32.1516	Other
NCU02003	-0.129118	1	0.842024	29.312	30.3916	Other
NCU02004	0.158293	1	0.717027	38.3974	32.5385	Other
NCU02005	-0.326018	1	0.322029	28.9517	34.4471	Other
NCU02006	-0.0257028	1	1	30.2252	29.1733	Other
NCU02007	-0.365183	1	0.235859	37.6223	45.863	Other
NCU02008	-0.438116	1	0.12287	38.1334	48.3138	Other
NCU02009	-0.0930664	1	0.955988	24.1736	24.4778	Other
NCU02010	-0.0939921	1	0.894049	25.7963	26.125	Other
NCU02011	-0.037898	1	1	23.6637	23.0375	Other
NCU02012	0.00594585	1	1	30.2809	28.6208	Other
NCU02013	0.0661105	1	0.916606	27.8657	25.2563	Other
NCU02014	-0.57749	1	0.115318	24.1389	34.3631	Other
NCU02015	-0.0278985	1	0.959211	28.5101	27.5631	Other
NCU02016	0.0664479	1	0.926717	36.0944	32.5857	Other
NCU02017	-0.0254508	1	0.959211	28.8927	27.7379	Other
NCU02018	-0.108886	1	0.779412	28.2697	28.7172	Other
NCU02019	-0.292267	1	0.480566	23.6917	27.4883	Other
NCU02020	0.196328	1	0.588549	32.8989	27.239	Other
NCU02021	-0.143049	1	0.786572	29.9618	31.2669	Other
NCU02022	0.126752	1	0.720707	39.2465	34.0191	Other
NCU02023	0.340427	1	0.266837	40.468	30.2871	Other
NCU02024	0.0625741	1	0.92215	32.2474	29.29	Other
NCU02025	-0.0393835	1	1	27.1002	26.3328	Other
NCU02026	0.00491869	1	1	26.6641	25.2311	Other
NCU02027	-0.274767	1	0.489087	24.2623	27.8138	Other
NCU02028	-0.0563685	1	1	20.9926	20.6916	Other
NCU02029	0.152932	1	0.717027	38.1944	32.4852	Other
NCU02030	0.127977	1	0.709208	36.068	31.2224	Other
NCU02031	0.202007	1	0.594508	34.0713	28.0013	Other
NCU02032	-0.213443	1	0.550205	26.3141	28.8767	Other
NCU02033	-0.0628201	1	0.957691	26.5184	26.215	Other
NCU02034	0.394826	1	0.227116	39.3086	28.3257	Other
NCU02035	-0.0513281	1	0.965811	40.612	39.952	Other
NCU02036	0.268767	1	0.444512	33.5517	26.3746	Other
NCU02038	0.323516	1	0.402876	28.5458	21.5246	Other
NCU02039	0.134971	1	0.802314	31.0543	26.8015	Other
NCU02040	-0.150014	1	0.695811	34.1164	35.7128	Other
NCU02041	-0.160176	1	0.779412	27.7624	29.4418	Other
NCU02042	0.000555497	1	1	30.5468	28.8738	Other
NCU02043	-0.0702251	1	0.958472	27.486	27.3696	Other
NCU02044	-0.250626	1	0.534922	23.781	26.7896	Other
NCU02046	0.0419047	1	0.920868	30.8567	28.4396	Other
NCU02048	0.00514825	1	1	26.6646	25.1984	Other
NCU02049	0.0187601	1	1	26.8376	25.1134	Other
NCU02051	0.409868	1	0.238875	36.5571	26.0529	Other
NCU02052	0.0500836	1	0.918102	28.8726	26.4537	Other
NCU02053	0.325235	1	0.35235	38.1539	28.8235	Other
NCU02054	0.0158009	1	1	25.8629	24.28	Other
NCU02055	-0.0663727	1	0.956865	25.3029	25.1119	Other
NCU02056	-0.170526	1	0.710194	25.6739	27.3597	Other
NCU02057	-0.0558693	1	1	25.9692	25.586	Other
NCU02058	0.0938524	1	0.85528	28.6145	25.4667	Other
NCU02059	-0.107431	1	0.894049	25.9922	26.5467	Other
NCU02060	0.0155896	1	0.979804	29.2508	27.4652	Other
NCU02061	-0.122241	1	0.823547	23.2542	24.0757	Other
NCU02062	0.297128	1	0.352028	44.3853	33.874	Other
NCU02063	0.0493859	1	0.980469	31.6047	29.0036	Other
NCU02064	-0.0100631	1	1	23.5568	22.4261	Other
NCU02065	0.209573	1	0.61452	28.3069	23.2056	Other
NCU02066	-0.10144	1	0.849324	32.4138	32.9778	Other
NCU02067	-0.0889422	1	0.827079	24.4487	24.629	Other
NCU02068	0.0541233	1	0.911571	24.7052	22.5495	Other
NCU02070	0.0222906	1	1	26.0659	24.3456	Other
NCU02071	-0.277977	1	0.416193	31.9126	36.6609	Other
NCU02073	-0.361422	1	0.362054	24.6515	30.1538	Other
NCU02074	0.044572	1	0.979067	27.6852	25.4595	Other
NCU02075	-0.15502	1	0.762624	23.6773	25.0225	Other
NCU02076	-0.0913296	1	0.81979	22.5683	22.7587	Other
NCU02077	-0.0778957	1	0.80952	38.427	38.4542	Other
NCU02078	-0.00910024	1	1	26.6211	25.3822	Other
NCU02079	0.157534	1	0.745952	31.7587	26.967	Other
NCU02080	-0.446605	1	0.290329	17.7254	23.0209	Other
NCU02081	-0.351218	1	0.517896	16.1547	19.5936	Other
NCU02082	0.185612	1	0.638884	32.4906	27.064	Other
NCU02083	0.116138	1	0.798953	30.1256	26.3456	Other
NCU02084	-0.164931	1	0.677817	29.9773	31.7179	Other
NCU02085	-0.0628482	1	0.961816	32.5255	32.1911	Other
NCU02086	-0.241657	1	0.497205	25.5721	28.6766	Other
NCU02087	0.541556	1	0.148469	34.9425	22.7223	Other
NCU02088	0.289539	1	0.401295	39.6859	30.8166	Other
NCU02089	0.175408	1	0.732629	28.2385	23.702	Other
NCU02090	-0.00248127	1	1	26.1055	24.7868	Other
NCU02091	0.099111	1	0.91952	30.1272	26.6742	Other
NCU02092	-0.173613	1	0.720183	27.3066	29.2207	Other
NCU02094	-0.154656	1	0.77555	26.7919	28.2511	Other
NCU02095	-0.198749	1	0.699053	23.3754	25.4122	Other
NCU02096	-0.0861052	1	0.844574	30.6654	30.8486	Other
NCU02097	-0.199726	1	0.611598	27.391	29.7749	Other
NCU02098	-0.291181	1	0.46218	21.4317	25.0076	Other
NCU02099	-0.0466967	1	0.961212	31.7056	30.9363	Other
NCU02100	-0.0163043	1	1	33.5304	32.1539	Other
NCU02101	0.0113677	1	1	33.3043	31.2305	Other
NCU02103	0.0380729	1	1	23.599	21.7637	Other
NCU02104	0.0404412	1	1	33.2768	30.6013	Other
NCU02105	-0.161318	1	0.62344	29.7799	31.5745	Other
NCU02106	-0.185108	1	0.720183	27.2613	29.4482	Other
NCU02107	-0.148161	1	0.682613	31.081	32.6334	Other
NCU02108	-0.400934	1	0.253061	24.454	30.7895	Other
NCU02109	0.0147405	1	1	32.3027	30.2857	Other
NCU02110	-0.0642579	1	0.899629	29.2881	29.0241	Other
NCU02111	0.0435957	1	0.978666	26.5837	24.4559	Other
NCU02112	0.160055	1	0.700704	34.106	28.916	Other
NCU02113	-0.0385845	1	1	24.7694	24.1266	Other
NCU02114	-0.10568	1	0.83355	26.6656	27.2189	Other
NCU02115	0.140278	1	0.7373	29.6881	25.5176	Other
NCU02116	-0.236453	1	0.4978	32.2102	35.9282	Other
NCU02117	0.0635297	1	1	26.1844	23.7816	Other
NCU02118	-0.0660847	1	0.891972	25.0079	24.9185	Other
NCU02119	0.165249	1	0.757463	34.8931	29.4588	Other
NCU02120	0.0338128	1	1	25.8505	23.9441	Other
NCU02121	-0.0153853	1	1	26.9813	25.8404	Other
NCU02122	-0.229213	1	0.477609	29.1079	32.4208	Other
NCU02123	-0.0275121	1	1	28.8458	27.8488	Other
NCU02124	-0.255562	1	0.497205	25.4217	28.8305	Other
NCU02125	-0.0664863	1	0.905858	33.2863	33.1015	Other
NCU02126	-0.0778014	1	0.844574	30.9763	30.8439	Other
NCU02127	-0.132378	1	0.77555	26.8898	27.928	Other
NCU02128	-0.354535	1	0.319819	24.6521	29.8798	Other
NCU02129	-0.581488	1	0.23772	13.5762	19.3023	Other
NCU02130	-0.0757062	1	0.849324	32.8758	32.8201	Other
NCU02131	0.0732105	1	0.916606	27.8387	25.0781	Other
NCU02132	-0.363227	1	0.477731	17.7911	21.5641	Other
NCU02133	-0.176133	1	0.667536	27.7814	29.7833	Other
NCU02134	-0.132027	1	0.887422	22.6005	23.5323	Other
NCU02136	-0.0514892	1	1	26.8843	26.4049	Other
NCU02137	0.0991059	1	0.802314	31.0889	27.4701	Other
NCU02138	-0.237665	1	0.504951	26.5621	29.6854	Other
NCU02139	-0.0481504	1	1	26.8066	26.2932	Other
NCU02142	-0.247632	1	0.504951	26.3758	29.7022	Other
NCU02144	-0.858391	1	0.0442488	14.6866	25.2456	Other
NCU02145	-0.430112	1	0.312278	16.1872	20.9129	Other
NCU02146	-0.00837215	1	1	34.0317	32.392	Other
NCU02147	-0.0057361	1	1	30.0493	28.5292	Other
NCU02148	-0.118945	1	0.836524	27.3289	28.1354	Other
NCU02149	-0.307541	1	0.386985	28.1917	33.0715	Other
NCU02150	-0.257611	1	0.512353	27.5539	31.2334	Other
NCU02151	0.0345912	1	0.981353	34.4558	31.9198	Other
NCU02152	0.0194305	1	1	31.7456	29.7678	Other
NCU02153	0.0593815	1	0.979445	28.4114	25.8124	Other
NCU02155	0.185005	1	0.588549	32.9688	27.4587	Other
NCU02156	-0.0834775	1	0.83355	26.72	26.808	Other
NCU02157	0.156612	1	0.745952	31.2523	26.6065	Other
NCU02158	-0.18998	1	0.62344	29.452	31.8528	Other
NCU02159	-0.088362	1	0.839345	28.5548	28.7373	Other
NCU02160	-0.195812	1	0.650087	24.7543	26.9403	Other
NCU02161	-0.044201	1	1	25.7779	25.1998	Other
NCU02162	-0.0853804	1	0.958472	27.2751	27.4257	Other
NCU02163	-0.60592	1	0.114088	19.5786	28.244	Other
NCU02164	-0.202465	1	0.598567	25.6146	27.976	Other
NCU02165	0.304453	1	0.464759	29.7673	22.8628	Other
NCU02167	-0.40474	1	0.375915	17.9755	22.6232	Other
NCU02168	-0.0246625	1	1	29.9188	28.8704	Other
NCU02169	0.0692515	1	0.927739	37.3406	33.7095	Other
NCU02170	0.344957	1	0.337811	35.7828	26.734	Other
NCU02171	-0.510014	1	0.363176	12.9274	17.5593	Other
NCU02172	-0.0811014	1	0.959912	29.2748	29.3624	Other
NCU02173	0.0281331	1	1	26.8423	24.9439	Other
NCU02174	-0.594441	1	0.114088	19.5917	28.054	Other
NCU02175	-0.0200762	1	1	28.9537	27.827	Other
NCU02176	-0.115534	1	0.771479	25.8895	26.6117	Other
NCU02177	0.0737926	1	0.980145	30.7623	27.6547	Other
NCU02178	0.275864	1	0.425549	37.3661	29.2317	Other
NCU02179	0.233658	1	0.546958	34.5873	27.838	Other
NCU02181	-0.140312	1	0.677817	30.3361	31.6671	Other
NCU02182	0.054738	1	1	28.079	25.6655	Other
NCU02183	-0.629452	1	0.270737	10.5865	15.7204	Other
NCU02184	0.191993	1	0.644288	33.7095	27.9564	Other
NCU02187	-0.113819	1	0.827079	24.5942	25.2575	Other
NCU02188	0.181915	1	0.605691	36.2669	30.2518	Other
NCU02189	-0.0558949	1	0.955988	24.9641	24.3773	Other
NCU02190	0.00816515	1	1	32.2259	30.3423	Other
NCU02191	-0.112206	1	0.78308	28.8692	29.5771	Other
NCU02192	-0.315801	1	0.353224	28.4669	33.6513	Other
NCU02193	-0.462941	1	0.251985	20.8335	27.2506	Other
NCU02194	0.0542749	1	0.92215	32.0204	29.2343	Other
NCU02195	0.403194	1	0.274297	37.2211	26.6994	Other
NCU02196	0.23747	1	0.478602	38.6952	31.117	Other
NCU02197	-0.192059	1	0.71532	26.2157	28.427	Other
NCU02198	0.543453	1	0.0939485	41.8916	27.2448	Other
NCU02199	0.474208	1	0.126842	45.3763	30.7455	Other
NCU02200	-0.142184	1	0.682613	31.2208	32.7456	Other
NCU02201	0.0550461	1	0.980469	31.4274	28.6941	Other
NCU02202	-0.040878	1	0.956865	25.4663	24.8578	Other
NCU02203	0.124125	1	0.7373	29.2149	25.4359	Other
NCU02204	-0.074459	1	0.959211	28.5985	28.4787	Other
NCU02205	-0.474888	1	0.118587	30.3643	40.5699	Other
NCU02206	-0.086541	1	0.857648	36.7062	36.9418	Other
NCU02207	-0.21242	1	0.598567	25.6078	28.15	Other
NCU02208	0.0216156	1	0.978242	25.2135	23.5545	Other
NCU02209	-0.102582	1	0.836524	27.2838	27.8641	Other
NCU02211	-0.0611716	1	0.958472	27.5384	27.2542	Other
NCU02212	0.0502021	1	1	31.1941	28.5015	Other
NCU02213	0.311782	1	0.352028	43.5586	33.2547	Other
NCU02214	0.490193	1	0.149159	38.9289	26.2268	Other
NCU02215	-0.0548259	1	0.905858	33.1185	32.5291	Other
NCU02216	-0.0100497	1	1	29.8778	28.5475	Other
NCU02217	-0.205357	1	0.521433	36.3804	39.6915	Other
NCU02218	0.144536	1	0.741734	30.6602	26.2658	Other
NCU02219	-0.24748	1	0.534922	23.8124	26.8213	Other
NCU02220	-0.0211034	1	1	25.3928	24.3954	Other
NCU02221	0.162921	1	0.741734	30.5005	25.7766	Other
NCU02222	-0.142901	1	0.677817	29.9808	31.4176	Other
NCU02223	0.218297	1	0.58232	32.0757	26.1174	Other
NCU02224	0.0437706	1	0.979067	27.5085	25.2775	Other
NCU02225	0.104951	1	0.805511	32.1922	28.3943	Other
NCU02226	0.00516085	1	1	35.3638	33.2951	Other
NCU02227	0.0836891	1	0.860259	30.5947	27.4506	Other
NCU02228	-0.0879713	1	0.897868	27.8661	28.0164	Other
NCU02229	-0.0508995	1	0.901301	30.1044	29.6271	Other
NCU02230	0.161246	1	0.757463	34.7472	29.4541	Other
NCU02231	0.0544022	1	0.979804	29.8023	27.1303	Other
NCU02232	-0.0323573	1	0.960578	30.5806	29.653	Other
NCU02233	0.0192353	1	0.979804	29.3285	27.4474	Other
[truncated: 7,731 more rows]
