# Supplementary material for: The ACF chromatin-remodeling complex is essential for Polycomb repression
Source: eLife. 2022 Mar 8;11:e77595. doi: 10.7554/eLife.77595 (PMC9038196; doi:10.7554/eLife.77595)
Supplement: Figure 3—figure supplement 2—source data 1. [file elife-77595-fig3-figsupp2-data1.xlsx]

## Sheet: ISWI
chr	start	end	summit	M_value	A_value	P_value	Peak_Group	normalized_read_density_in_WT_merged	normalized_read_density_in_iswi_merged		chrom	start	end	gene		log2(WT)	log2(crf4-1)	log2(FC)	k27_col
Supercontig_12.1	1996875	1999171	1148.5	-2.80262	9.38196	7.12458e-218	peaks1_common	252.589	1762.33		Supercontig_12.1	1996874	1999171	NCU01926		7.98065	10.7833	2.80262	green
Supercontig_12.1	102314	105940	1813.5	-2.32582	9.06963	5.9416e-155	peaks1_common	239.972	1203.1		Supercontig_12.1	102313	105940	NCU08051		7.90672	10.2325	2.32582	green
Supercontig_12.6	4134789	4138121	1666.5	-2.11864	9.50996	7.50606e-174	peaks1_common	349.861	1519.39		Supercontig_12.6	4134788	4138121	NCU05000		8.45064	10.5693	2.11864	green
Supercontig_12.1	9664598	9666695	1049	-2.1053	9.96632	7.12458e-218	peaks1_common	482.261	2075.11		Supercontig_12.1	9664597	9666695	NCU08634		8.91367	11.019	2.1053	green
Supercontig_12.3	57807	60112	1153	-2.09469	9.11952	1.68299e-130	peaks1_common	269.133	1149.56		Supercontig_12.3	57806	60112	NCU09511		8.07218	10.1669	2.09469	green
Supercontig_12.1	102849	103781	466.5	-2.09193	9.19714	3.37294e-137	peaks1_common	284.281	1211.94		Supercontig_12.1	102848	103781	NCU16303		8.15117	10.2431	2.09193	green
Supercontig_12.3	82824	85350	1263.5	-2.02035	8.86577	4.05026e-102	peaks1_common	231.617	939.627		Supercontig_12.3	82823	85350	NCU11406		7.85559	9.87595	2.02035	green
Supercontig_12.4	5907077	5909108	1016	-2.00018	9.24082	1.99845e-129	peaks1_common	302.487	1210.1		Supercontig_12.4	5907076	5909108	NCU05162		8.24073	10.2409	2.00018	green
Supercontig_12.2	4430506	4433956	1725.5	-1.96512	8.94279	6.42845e-102	peaks1_common	249.039	972.362		Supercontig_12.2	4430505	4433956	NCU09485		7.96023	9.92535	1.96512	green
Supercontig_12.2	4439442	4442042	1300.5	-1.92565	9.11672	3.51535e-110	peaks1_common	284.818	1082.05		Supercontig_12.2	4439441	4442042	NCU09488		8.15389	10.0795	1.92565	green
Supercontig_12.5	6377018	6377882	432.5	-1.91735	9.61083	3.48218e-153	peaks1_common	402.308	1519.63		Supercontig_12.5	6377017	6377882	NCU17051		8.65216	10.5695	1.91735	green
Supercontig_12.1	9610349	9612668	1160	-1.89379	8.62266	1.17752e-76	peaks1_common	204.473	759.842		Supercontig_12.1	9610348	9612668	NCU08615		7.67576	9.56956	1.89379	green
Supercontig_12.1	99983	102134	1076	-1.89281	9.36861	1.62464e-126	peaks1_common	343.033	1273.88		Supercontig_12.1	99982	102134	NCU08050		8.4222	10.315	1.89281	green
Supercontig_12.7	14946	20558	2806.5	-1.88555	9.42743	8.163e-131	peaks1_common	358.208	1323.56		Supercontig_12.7	14945	20558	NCU09301		8.48465	10.3702	1.88555	green
Supercontig_12.2	4434417	4437058	1321	-1.87167	10.319	7.12458e-218	peaks1_common	667.736	2443.62		Supercontig_12.2	4434416	4437058	NCU09486		9.38314	11.2548	1.87167	green
Supercontig_12.6	4059237	4062939	1851.5	-1.85456	8.89123	7.6629e-88	peaks1_common	249.682	902.955		Supercontig_12.6	4059236	4062939	NCU05016		7.96395	9.81851	1.85456	green
Supercontig_12.6	4080368	4082317	975	-1.84047	9.38834	2.55972e-121	peaks1_common	354.123	1268.21		Supercontig_12.6	4080367	4082317	NCU05012		8.4681	10.3086	1.84047	green
Supercontig_12.3	17631	19142	756	-1.82831	8.93202	6.57531e-88	peaks1_common	259.19	920.437		Supercontig_12.3	17630	19142	NCU09522		8.01787	9.84617	1.82831	green
Supercontig_12.2	4437282	4438739	729	-1.78301	10.3169	1.58911e-214	peaks1_common	687.595	2366.31		Supercontig_12.2	4437281	4438739	NCU09487		9.42541	11.2084	1.78301	green
Supercontig_12.1	9632834	9635437	1302	-1.77803	8.9841	1.89975e-86	peaks1_common	273.441	937.786		Supercontig_12.1	9632833	9635437	NCU08624		8.09508	9.87311	1.77803	green
Supercontig_12.5	5964225	5966551	1163.5	-1.77674	9.09266	9.91142e-93	peaks1_common	294.943	1010.62		Supercontig_12.5	5964224	5966551	NCU09854		8.20429	9.98103	1.77674	green
Supercontig_12.3	19915	22496	1291	-1.76271	9.31257	6.8823e-106	peaks1_common	345.182	1171.32		Supercontig_12.3	19914	22496	NCU09521		8.43122	10.1939	1.76271	green
Supercontig_12.3	81974	83774	900.5	-1.73785	8.96368	1.53647e-81	peaks1_common	273.378	911.82		Supercontig_12.3	81973	83774	NCU16606		8.09476	9.83261	1.73785	green
Supercontig_12.6	4085380	4092690	3655.5	-1.73675	8.63503	3.67482e-65	peaks1_common	217.769	725.788		Supercontig_12.6	4085379	4092690	NCU05011		7.76665	9.50341	1.73675	green
Supercontig_12.6	4141983	4143448	733	-1.72511	10.5015	7.12458e-218	peaks1_common	797.298	2635.91		Supercontig_12.6	4141982	4143448	NCU04998		9.63898	11.3641	1.72511	green
Supercontig_12.2	1672115	1675786	1836	-1.7124	9.16887	8.48231e-91	peaks1_common	317.953	1041.95		Supercontig_12.2	1672114	1675786	NCU05460		8.31267	10.0251	1.7124	green
Supercontig_12.2	4389610	4392089	1240	-1.70937	8.79433	3.30132e-70	peaks1_common	245.511	802.866		Supercontig_12.2	4389609	4392089	NCU09471		7.93964	9.64901	1.70937	green
Supercontig_12.6	4051752	4053180	714.5	-1.70403	9.05962	2.10606e-83	peaks1_common	295.621	963.162		Supercontig_12.6	4051751	4053180	NCU05019		8.2076	9.91163	1.70403	green
Supercontig_12.7	4221114	4228321	3604	-1.68482	9.94423	6.74723e-149	peaks1_common	549.441	1766.45		Supercontig_12.7	4221113	4228321	NCU05901		9.10182	10.7866	1.68482	green
Supercontig_12.7	4200217	4202741	1262.5	-1.68371	10.7548	7.12458e-218	peaks1_common	964.017	3096.93		Supercontig_12.7	4200216	4202741	NCU05897		9.91292	11.5966	1.68371	green
Supercontig_12.3	5242495	5244087	796.5	-1.67937	10.324	9.93587e-192	peaks1_common	716.268	2294.12		Supercontig_12.3	5242494	5244087	NCU08760		9.48435	11.1637	1.67937	green
Supercontig_12.2	63048	66547	1750	-1.67164	8.38127	4.29878e-51	peaks1_common	186.813	595.142		Supercontig_12.2	63047	66547	NCU09609		7.54545	9.21709	1.67164	green
Supercontig_12.2	4393055	4396374	1660	-1.66752	8.72564	5.53966e-64	peaks1_common	237.516	754.512		Supercontig_12.2	4393054	4396374	NCU09472		7.89188	9.5594	1.66752	green
Supercontig_12.6	4119187	4122396	1605	-1.66363	10.0236	3.11541e-153	peaks1_common	584.778	1852.65		Supercontig_12.6	4119186	4122396	NCU10597		9.19175	10.8554	1.66363	green
Supercontig_12.1	9661546	9662413	434	-1.66215	8.74207	2.65667e-64	peaks1_common	240.684	761.735		Supercontig_12.1	9661545	9662413	NCU16497		7.91099	9.57314	1.66215	green
Supercontig_12.1	17441	19615	1087.5	-1.64974	10.498	1.31249e-208	peaks1_common	816.382	2561.62		Supercontig_12.1	17440	19615	NCU09904		9.6731	11.3228	1.64974	green
Supercontig_12.7	4162091	4165498	1704	-1.64173	9.53273	5.53965e-107	peaks1_common	419.308	1308.41		Supercontig_12.7	4162090	4165498	NCU05885		8.71186	10.3536	1.64173	green
Supercontig_12.6	50640	54264	1812.5	-1.63442	9.79071	2.84406e-126	peaks1_common	502.681	1560.64		Supercontig_12.6	50639	54264	NCU07129		8.9735	10.6079	1.63442	green
Supercontig_12.1	9677219	9678368	575	-1.63435	8.85983	2.25831e-67	peaks1_common	263.682	818.594		Supercontig_12.1	9677218	9678368	NCU08636		8.04266	9.67701	1.63435	green
Supercontig_12.1	9647309	9649735	1213.5	-1.62963	9.415	2.07731e-97	peaks1_common	388.073	1200.83		Supercontig_12.1	9647308	9649735	NCU08629		8.60018	10.2298	1.62963	green
Supercontig_12.1	9701175	9704915	1870.5	-1.62943	9.08264	6.17326e-78	peaks1_common	308.243	953.676		Supercontig_12.1	9701174	9704915	NCU08642		8.26792	9.89736	1.62943	green
Supercontig_12.2	59495	63119	1812.5	-1.62942	8.69661	4.30619e-60	peaks1_common	235.878	729.781		Supercontig_12.2	59494	63119	NCU09610		7.8819	9.51132	1.62942	green
Supercontig_12.6	4125928	4127851	962	-1.62875	8.78569	1.08388e-63	peaks1_common	250.96	776.082		Supercontig_12.6	4125927	4127851	NCU05001		7.97132	9.60007	1.62875	green
Supercontig_12.3	16226	17294	534.5	-1.62751	10.0863	2.49946e-153	peaks1_common	618.481	1910.98		Supercontig_12.3	16225	17294	NCU09523		9.27258	10.9001	1.62751	green
Supercontig_12.6	4115923	4117080	579	-1.61453	9.64552	9.81578e-112	peaks1_common	457.699	1401.53		Supercontig_12.6	4115922	4117080	NCU05005		8.83826	10.4528	1.61453	green
Supercontig_12.7	4157036	4159279	1122	-1.60708	9.07501	2.63907e-75	peaks1_common	309.001	941.326		Supercontig_12.7	4157035	4159279	NCU05883		8.27147	9.87855	1.60708	green
Supercontig_12.5	6254918	6256671	877	-1.6067	8.96678	6.18669e-70	peaks1_common	286.706	873.177		Supercontig_12.5	6254917	6256671	NCU07202		8.16343	9.77013	1.6067	green
Supercontig_12.1	6266990	6268040	525.5	-1.60636	8.84561	1.6333e-64	peaks1_common	263.641	802.741		Supercontig_12.1	6266989	6268040	NCU07354		8.04243	9.64879	1.60636	green
Supercontig_12.6	3234149	3236869	1360.5	-1.60188	8.72566	2.27863e-59	peaks1_common	242.984	737.552		Supercontig_12.6	3234148	3236869	NCU11216		7.92472	9.5266	1.60188	green
Supercontig_12.7	21491	25060	1785	-1.56994	8.92388	4.31036e-65	peaks1_common	281.875	836.864		Supercontig_12.7	21490	25060	NCU09300		8.13891	9.70885	1.56994	green
Supercontig_12.1	9608358	9610079	861	-1.56158	8.60777	3.37272e-52	peaks1_common	227.068	670.252		Supercontig_12.1	9608357	9610079	NCU08614		7.82698	9.38856	1.56158	green
Supercontig_12.5	6362123	6362862	370	-1.54733	8.99549	2.34831e-66	peaks1_common	298.549	872.587		Supercontig_12.5	6362122	6362862	NCU17050		8.22182	9.76916	1.54733	green
Supercontig_12.6	13843	17940	2049	-1.54614	10.4367	6.18822e-176	peaks1_common	811.063	2368.59		Supercontig_12.6	13842	17940	NCU07139		9.66367	11.2098	1.54614	green
Supercontig_12.5	6380906	6384609	1852	-1.54429	9.79922	1.15752e-113	peaks1_common	521.699	1521.59		Supercontig_12.5	6380905	6384609	NCU07162		9.02707	10.5714	1.54429	green
Supercontig_12.5	6252666	6254133	734	-1.54122	8.79502	8.17816e-58	peaks1_common	260.368	757.777		Supercontig_12.5	6252665	6254133	NCU07203		8.02441	9.56563	1.54122	green
Supercontig_12.3	23389	29028	2820	-1.53588	10.7145	9.98895e-210	peaks1_common	986.749	2861.23		Supercontig_12.3	23388	29028	NCU09520		9.94654	11.4824	1.53588	green
Supercontig_12.7	25355	27256	951	-1.53514	9.25266	1.01477e-77	peaks1_common	358.316	1038.46		Supercontig_12.7	25354	27256	NCU09299		8.48509	10.0202	1.53514	green
Supercontig_12.3	103971	107924	1977	-1.51966	8.44377	1.80043e-44	peaks1_common	205.635	589.603		Supercontig_12.3	103970	107924	NCU09502		7.68394	9.2036	1.51966	green
Supercontig_12.5	6247448	6250397	1475	-1.51658	9.15378	6.99969e-71	peaks1_common	336.74	963.453		Supercontig_12.5	6247447	6250397	NCU07205		8.39549	9.91207	1.51658	green
Supercontig_12.6	32017	35180	1582	-1.51325	8.74066	8.21457e-54	peaks1_common	253.183	722.716		Supercontig_12.6	32016	35180	NCU07135		7.98404	9.49729	1.51325	green
Supercontig_12.7	4159790	4161469	840	-1.49402	9.47686	1.28374e-85	peaks1_common	424.567	1195.89		Supercontig_12.7	4159789	4161469	NCU05884		8.72985	10.2239	1.49402	green
Supercontig_12.6	4064967	4066174	604	-1.48299	9.79231	1.47213e-104	peaks1_common	530.355	1482.49		Supercontig_12.6	4064966	4066174	NCU05015		9.05081	10.5338	1.48299	green
Supercontig_12.3	4923246	4925445	1100	-1.4778	9.00562	3.06128e-61	peaks1_common	307.986	857.813		Supercontig_12.3	4923245	4925445	NCU16708		8.26672	9.74452	1.4778	green
Supercontig_12.5	6363132	6365166	1017.5	-1.47384	8.50673	8.13912e-44	peaks1_common	218.246	606.2		Supercontig_12.5	6363131	6365166	NCU07169		7.76981	9.24365	1.47384	green
Supercontig_12.1	109911	112060	1075	-1.47373	8.73857	4.14406e-51	peaks1_common	256.303	711.853		Supercontig_12.1	109910	112060	NCU08052		8.0017	9.47543	1.47373	green
Supercontig_12.3	53169	56089	1460.5	-1.46885	8.64388	8.25796e-48	peaks1_common	240.427	665.505		Supercontig_12.3	53168	56089	NCU09513		7.90945	9.37831	1.46885	green
Supercontig_12.7	952698	956090	1696.5	-1.46722	8.44462	1.69797e-41	peaks1_common	209.53	579.325		Supercontig_12.7	952697	956090	NCU09575		7.71101	9.17823	1.46722	green
Supercontig_12.2	43701	45278	789	-1.46663	9.3322	4.87862e-75	peaks1_common	387.724	1071.57		Supercontig_12.2	43700	45278	NCU09616		8.59889	10.0655	1.46663	green
Supercontig_12.3	5231463	5235227	1882.5	-1.46056	10.0053	4.33196e-117	peaks1_common	619.517	1705		Supercontig_12.3	5231462	5235227	NCU08763		9.275	10.7356	1.46056	green
Supercontig_12.7	4228922	4233718	2398.5	-1.45653	10.2157	1.90837e-134	peaks1_common	717.808	1970.01		Supercontig_12.7	4228921	4233718	NCU05902		9.48745	10.944	1.45653	green
Supercontig_12.6	4153568	4155604	1018.5	-1.45444	10.1918	8.60884e-132	peaks1_common	706.507	1936.18		Supercontig_12.6	4153567	4155604	NCU04994		9.46456	10.919	1.45444	green
Supercontig_12.2	4457764	4465976	4106.5	-1.45179	10.197	8.30931e-132	peaks1_common	709.724	1941.43		Supercontig_12.2	4457763	4465976	NCU09492		9.47111	10.9229	1.45179	green
Supercontig_12.5	6378064	6379103	520	-1.4475	9.91377	2.78672e-108	peaks1_common	584.079	1592.99		Supercontig_12.5	6378063	6379103	NCU07164		9.19002	10.6375	1.4475	green
Supercontig_12.2	168919	170353	717.5	-1.44662	8.89742	1.34076e-54	peaks1_common	288.837	787.278		Supercontig_12.2	168918	170353	NCU03577		8.17411	9.62073	1.44662	green
Supercontig_12.3	5199747	5202476	1365	-1.44611	8.729	7.73114e-49	peaks1_common	257.057	700.41		Supercontig_12.3	5199746	5202476	NCU08771		8.00594	9.45206	1.44611	green
Supercontig_12.3	4624362	4626217	928	-1.44339	9.68906	2.5272e-92	peaks1_common	500.548	1361.29		Supercontig_12.3	4624361	4626217	NCU08199		8.96736	10.4108	1.44339	green
Supercontig_12.1	9666967	9667581	307.5	-1.44178	9.99574	1.02635e-113	peaks1_common	619.453	1682.78		Supercontig_12.1	9666966	9667581	NCU08635		9.27485	10.7166	1.44178	green
Supercontig_12.7	4173243	4174112	435	-1.43705	9.56795	1.33538e-84	peaks1_common	461.256	1248.93		Supercontig_12.7	4173242	4174112	NCU11305		8.84942	10.2865	1.43705	green
Supercontig_12.3	4933196	4935949	1377	-1.42005	9.02398	1.52552e-57	peaks1_common	318.236	851.584		Supercontig_12.3	4933195	4935949	NCU08556		8.31396	9.734	1.42005	green
Supercontig_12.5	6124357	6127639	1641.5	-1.41717	10.296	1.30736e-134	peaks1_common	769.296	2054.49		Supercontig_12.5	6124356	6127639	NCU07241		9.58739	11.0046	1.41717	green
Supercontig_12.7	4192069	4196402	2167	-1.41487	8.59248	6.15295e-43	peaks1_common	236.393	630.309		Supercontig_12.7	4192068	4196402	NCU05895		7.88504	9.29991	1.41487	green
Supercontig_12.2	103225	105318	1047	-1.41202	8.8314	4.83131e-50	peaks1_common	279.245	743.099		Supercontig_12.2	103224	105318	NCU09594		8.12539	9.53741	1.41202	green
Supercontig_12.3	37692	41877	2093	-1.40885	8.58457	2.75019e-42	peaks1_common	235.592	625.556		Supercontig_12.3	37691	41877	NCU09516		7.88015	9.28899	1.40885	green
Supercontig_12.2	1690985	1691833	424.5	-1.40702	9.07748	2.00875e-58	peaks1_common	331.754	879.775		Supercontig_12.2	1690984	1691833	NCU05472		8.37397	9.78099	1.40702	green
Supercontig_12.3	5135492	5136906	707.5	-1.40362	9.26103	8.28297e-66	peaks1_common	377.209	997.961		Supercontig_12.3	5135491	5136906	NCU08783		8.55922	9.96284	1.40362	green
Supercontig_12.7	949514	953044	1765.5	-1.40193	8.30995	3.86573e-35	peaks1_common	195.224	515.888		Supercontig_12.7	949513	953044	NCU09576		7.60898	9.01092	1.40193	green
Supercontig_12.3	96578	99187	1305	-1.39542	8.69432	8.6004e-45	peaks1_common	255.399	671.866		Supercontig_12.3	96577	99187	NCU09504		7.99661	9.39203	1.39542	green
Supercontig_12.4	77283	81512	2115	-1.38989	9.04784	5.24675e-56	peaks1_common	326.943	856.782		Supercontig_12.4	77282	81512	NCU09654		8.3529	9.74279	1.38989	green
Supercontig_12.4	5844077	5847442	1683	-1.38877	9.22885	5.2406e-63	peaks1_common	370.792	970.938		Supercontig_12.4	5844076	5847442	NCU05180		8.53446	9.92324	1.38877	green
Supercontig_12.1	9681489	9685711	2111.5	-1.38373	9.81641	8.19311e-93	peaks1_common	558.164	1456.48		Supercontig_12.1	9681488	9685711	NCU08637		9.12455	10.5083	1.38373	green
Supercontig_12.3	404824	408883	2030	-1.37862	8.4843	5.25187e-38	peaks1_common	222.088	577.473		Supercontig_12.3	404823	408883	NCU05664		7.79499	9.17361	1.37862	green
Supercontig_12.7	4216449	4219228	1390	-1.37757	10.6553	8.33332e-163	peaks1_common	1000.48	2599.55		Supercontig_12.7	4216448	4219228	NCU05899		9.96647	11.344	1.37757	green
Supercontig_12.3	85931	89527	1798.5	-1.37681	9.8719	1.4238e-95	peaks1_common	581.443	1509.97		Supercontig_12.3	85930	89527	NCU11405		9.1835	10.5603	1.37681	green
Supercontig_12.6	4047775	4049947	1086.5	-1.36936	8.44315	2.09482e-36	peaks1_common	216.537	559.436		Supercontig_12.6	4047774	4049947	NCU05020		7.75847	9.12783	1.36936	green
Supercontig_12.2	151324	152200	438.5	-1.3687	9.44548	9.36903e-71	peaks1_common	433.873	1120.42		Supercontig_12.2	151323	152200	NCU03580		8.76113	10.1298	1.3687	green
Supercontig_12.1	9632157	9632730	287	-1.36578	8.77889	3.18466e-45	peaks1_common	273.614	705.147		Supercontig_12.1	9632156	9632730	NCU08623		8.096	9.46178	1.36578	green
Supercontig_12.5	6166308	6168117	905	-1.36215	10.4922	2.30511e-142	peaks1_common	898.363	2309.4		Supercontig_12.5	6166307	6168117	NCU07231		9.81116	11.1733	1.36215	green
Supercontig_12.3	330511	333488	1489	-1.36118	8.90093	7.38391e-49	peaks1_common	298.242	766.17		Supercontig_12.3	330510	333488	NCU10001		8.22034	9.58152	1.36118	green
Supercontig_12.1	9635625	9638039	1207.5	-1.36109	8.55545	7.391e-39	peaks1_common	234.738	602.992		Supercontig_12.1	9635624	9638039	NCU08625		7.87491	9.236	1.36109	green
Supercontig_12.7	4112567	4113788	611	-1.36061	8.94609	3.78768e-50	peaks1_common	307.786	790.376		Supercontig_12.7	4112566	4113788	NCU05869		8.26579	9.6264	1.36061	green
Supercontig_12.6	4112027	4114294	1134	-1.35859	8.56872	3.79011e-39	peaks1_common	237.112	608.037		Supercontig_12.6	4112026	4114294	NCU05006		7.88942	9.24801	1.35859	green
Supercontig_12.2	46017	49683	1833.5	-1.35695	8.48864	3.4943e-37	peaks1_common	224.437	574.879		Supercontig_12.2	46016	49683	NCU09615		7.81016	9.16711	1.35695	green
Supercontig_12.2	96532	100907	2188	-1.35157	8.74206	2.09302e-43	peaks1_common	268.035	683.996		Supercontig_12.2	96531	100907	NCU09595		8.06628	9.41785	1.35157	green
Supercontig_12.6	4151456	4152253	399	-1.3468	9.6167	4.35598e-77	peaks1_common	492.268	1252.07		Supercontig_12.6	4151455	4152253	NCU10537		8.9433	10.2901	1.3468	green
Supercontig_12.2	4426885	4428862	989	-1.34436	9.45947	4.52828e-69	peaks1_common	441.812	1121.84		Supercontig_12.2	4426884	4428862	NCU09484		8.78729	10.1317	1.34436	green
Supercontig_12.3	100167	103696	1765	-1.34414	8.2806	8.62246e-32	peaks1_common	195.162	495.476		Supercontig_12.3	100166	103696	NCU09503		7.60853	8.95267	1.34414	green
Supercontig_12.6	4008514	4010550	1018.5	-1.34099	8.56459	4.11351e-38	peaks1_common	237.881	602.612		Supercontig_12.6	4008513	4010550	NCU11220		7.8941	9.23508	1.34099	green
Supercontig_12.1	9654225	9659092	2434	-1.33981	8.27255	1.44328e-31	peaks1_common	194.368	491.98		Supercontig_12.1	9654224	9659092	NCU08632		7.60264	8.94246	1.33981	green
Supercontig_12.7	4155062	4158498	1718.5	-1.33943	8.57815	2.10875e-38	peaks1_common	240.257	607.974		Supercontig_12.7	4155061	4158498	NCU05882		7.90844	9.24787	1.33943	green
Supercontig_12.1	3178	6443	1633	-1.33776	10.2767	1.03244e-118	peaks1_common	780.254	1972.16		Supercontig_12.1	3177	6443	NCU09901		9.6078	10.9456	1.33776	green
Supercontig_12.3	56082	57392	655.5	-1.33524	8.75076	1.1541e-42	peaks1_common	271.186	684.25		Supercontig_12.3	56081	57392	NCU09512		8.08314	9.41838	1.33524	green
Supercontig_12.5	6127818	6129928	1055.5	-1.33254	8.43495	1.38798e-34	peaks1_common	218.075	549.212		Supercontig_12.5	6127817	6129928	NCU07240		7.76868	9.10122	1.33254	green
Supercontig_12.4	79335	81698	1182	-1.33123	8.96799	8.49717e-49	peaks1_common	315.692	794.336		Supercontig_12.4	79334	81698	NCU11415		8.30237	9.6336	1.33123	green
Supercontig_12.7	4168312	4170729	1209	-1.32496	10.2185	6.25934e-112	peaks1_common	752.767	1885.88		Supercontig_12.7	4168311	4170729	NCU05887		9.55606	10.881	1.32496	green
Supercontig_12.6	57481	60490	1505	-1.29316	8.87022	1.75303e-43	peaks1_common	298.925	732.558		Supercontig_12.6	57480	60490	NCU07127		8.22364	9.5168	1.29316	green
Supercontig_12.7	39192	43527	2168	-1.29183	9.08337	7.97388e-50	peaks1_common	346.679	848.802		Supercontig_12.7	39191	43527	NCU09296		8.43746	9.72928	1.29183	green
Supercontig_12.5	6250622	6251866	622.5	-1.28659	9.36058	1.81166e-59	peaks1_common	420.886	1026.75		Supercontig_12.5	6250621	6251866	NCU07204		8.71728	10.0039	1.28659	green
Supercontig_12.6	57463	60475	1506.5	-1.28384	8.86549	1.01004e-42	peaks1_common	298.911	727.806		Supercontig_12.6	57462	60475	NCU07126		8.22357	9.50741	1.28384	green
Supercontig_12.3	32761	35175	1207.5	-1.28316	10.1724	7.57634e-102	peaks1_common	739.692	1800.2		Supercontig_12.3	32760	35175	NCU09518		9.53078	10.8139	1.28316	green
Supercontig_12.7	4166232	4167943	856	-1.27648	10.2868	6.69544e-109	peaks1_common	802.596	1944.27		Supercontig_12.7	4166231	4167943	NCU05886		9.64853	10.925	1.27648	green
Supercontig_12.6	44601	46968	1184	-1.27291	8.80123	3.14751e-40	peaks1_common	286.974	693.468		Supercontig_12.6	44600	46968	NCU17058		8.16478	9.43769	1.27291	green
Supercontig_12.7	4170812	4172944	1066.5	-1.27044	9.90871	1.07072e-83	peaks1_common	618.869	1492.93		Supercontig_12.7	4170811	4172944	NCU05888		9.27349	10.5439	1.27044	green
Supercontig_12.1	2022855	2024545	845.5	-1.2678	8.44844	7.55725e-32	peaks1_common	225.118	542.072		Supercontig_12.1	2022854	2024545	NCU01922		7.81454	9.08234	1.2678	green
Supercontig_12.1	59146	61150	1002.5	-1.26643	10.3217	5.73358e-110	peaks1_common	825.157	1985.04		Supercontig_12.1	59145	61150	NCU09913		9.68853	10.955	1.26643	green
Supercontig_12.6	35423	37282	930	-1.2655	10.4156	5.38748e-117	peaks1_common	880.903	2117.78		Supercontig_12.6	35422	37282	NCU07134		9.78284	11.0483	1.2655	green
Supercontig_12.2	4396477	4397796	660	-1.26363	8.27433	2.68328e-28	peaks1_common	199.814	479.752		Supercontig_12.2	4396476	4397796	NCU09473		7.64252	8.90615	1.26363	green
Supercontig_12.1	9652927	9654209	641.5	-1.26133	9.67095	1.70232e-70	peaks1_common	526.498	1262.1		Supercontig_12.1	9652926	9654209	NCU08631		9.04029	10.3016	1.26133	green
Supercontig_12.3	421420	422927	754	-1.25216	9.15012	3.57921e-49	peaks1_common	368.122	876.858		Supercontig_12.3	421419	422927	NCU05668		8.52404	9.7762	1.25216	green
Supercontig_12.2	157660	166671	4506	-1.24886	8.2322	4.74752e-27	peaks1_common	195.059	463.566		Supercontig_12.2	157659	166671	NCU03578		7.60777	8.85663	1.24886	green
Supercontig_12.3	4619401	4622318	1459	-1.2389	9.3003	2.62813e-53	peaks1_common	410.389	968.595		Supercontig_12.3	4619400	4622318	NCU08197		8.68085	9.91975	1.2389	green
Supercontig_12.7	4106337	4108739	1201.5	-1.23695	10.4273	9.338e-113	peaks1_common	896.932	2114.07		Supercontig_12.7	4106336	4108739	NCU05866		9.80885	11.0458	1.23695	green
Supercontig_12.6	4144717	4146414	849	-1.23597	10.8816	2.66978e-153	peaks1_common	1229.28	2895.44		Supercontig_12.6	4144716	4146414	NCU04997		10.2636	11.4996	1.23597	green
Supercontig_12.1	9643796	9647246	1725.5	-1.2354	8.4269	5.44952e-30	peaks1_common	224.287	528.075		Supercontig_12.1	9643795	9647246	NCU08628		7.8092	9.0446	1.2354	green
Supercontig_12.1	9636259	9639583	1662.5	-1.23151	8.40443	2.46182e-29	peaks1_common	221.118	519.214		Supercontig_12.1	9636258	9639583	NCU16496		7.78868	9.02019	1.23151	green
Supercontig_12.6	4117160	4118515	678	-1.22521	10.0045	3.00818e-83	peaks1_common	671.799	1570.59		Supercontig_12.6	4117159	4118515	NCU05004		9.39189	10.6171	1.22521	green
Supercontig_12.5	6243421	6245798	1189	-1.22445	9.51407	5.12295e-60	peaks1_common	478.324	1117.68		Supercontig_12.5	6243420	6245798	NCU07206		8.90185	10.1263	1.22445	green
Supercontig_12.2	4413689	4417398	1855	-1.22348	8.33167	1.34933e-27	peaks1_common	210.829	492.305		Supercontig_12.2	4413688	4417398	NCU09481		7.71993	8.94341	1.22348	green
Supercontig_12.6	29375	30141	383.5	-1.21801	10.636	4.00535e-126	peaks1_common	1043.35	2427.1		Supercontig_12.6	29374	30141	NCU07136		10.027	11.245	1.21801	green
Supercontig_12.3	94069	96232	1082	-1.21694	9.05195	1.23517e-43	peaks1_common	348.129	809.238		Supercontig_12.3	94068	96232	NCU09505		8.44348	9.66042	1.21694	green
Supercontig_12.2	88570	91982	1706.5	-1.21555	8.52942	4.0035e-31	peaks1_common	242.467	563.08		Supercontig_12.2	88569	91982	NCU09598		7.92165	9.13719	1.21555	green
Supercontig_12.4	5910233	5911590	679	-1.21548	9.12522	8.6438e-46	peaks1_common	366.452	850.967		Supercontig_12.4	5910232	5911590	NCU05161		8.51748	9.73296	1.21548	green
Supercontig_12.3	4599890	4601724	917.5	-1.21354	9.10528	6.36272e-45	peaks1_common	361.665	838.723		Supercontig_12.3	4599889	4601724	NCU08190		8.49851	9.71205	1.21354	green
Supercontig_12.1	15930	16647	359	-1.20675	10.2672	1.89151e-96	peaks1_common	811.161	1872.3		Supercontig_12.1	15929	16647	NCU11134		9.66384	10.8706	1.20675	green
Supercontig_12.3	4602506	4603846	670.5	-1.20566	9.73217	2.69766e-67	peaks1_common	560.022	1291.65		Supercontig_12.3	4602505	4603846	NCU08191		9.12934	10.335	1.20566	green
Supercontig_12.7	11354	13870	1258.5	-1.20114	9.58439	1.48967e-60	peaks1_common	506.29	1164.07		Supercontig_12.7	11353	13870	NCU09302		8.98382	10.185	1.20114	green
Supercontig_12.6	4020776	4022542	883.5	-1.19892	9.32696	8.47619e-51	peaks1_common	423.876	973.084		Supercontig_12.6	4020775	4022542	NCU05025		8.7275	9.92642	1.19892	green
Supercontig_12.3	189369	191716	1174	-1.19562	8.86973	1.62405e-37	peaks1_common	309.098	707.968		Supercontig_12.3	189368	191716	NCU09156		8.27192	9.46754	1.19562	green
Supercontig_12.1	9177	13334	2079	-1.19429	10.0563	4.82847e-82	peaks1_common	703.885	1610.71		Supercontig_12.1	9176	13334	NCU09903		9.4592	10.6535	1.19429	green
Supercontig_12.3	4613759	4617279	1760.5	-1.19116	8.02295	9.52721e-22	peaks1_common	172.132	393.039		Supercontig_12.3	4613758	4617279	NCU08195		7.42737	8.61853	1.19116	green
Supercontig_12.5	6360603	6362021	709.5	-1.18754	9.06642	4.09815e-42	peaks1_common	355.24	809.109		Supercontig_12.5	6360602	6362021	NCU07170		8.47265	9.66019	1.18754	green
Supercontig_12.3	552040	553005	483	-1.18568	8.70819	2.39229e-33	peaks1_common	277.309	630.796		Supercontig_12.3	552039	553005	NCU05698		8.11535	9.30103	1.18568	green
Supercontig_12.4	73408	75325	959	-1.18037	9.68164	2.82299e-62	peaks1_common	545.507	1236.31		Supercontig_12.4	73407	75325	NCU09652		9.09146	10.2718	1.18037	green
Supercontig_12.5	6261577	6263248	836	-1.17995	8.54857	9.37986e-30	peaks1_common	248.757	563.607		Supercontig_12.5	6261576	6263248	NCU07200		7.95859	9.13855	1.17995	green
Supercontig_12.2	1695026	1696015	495	-1.17986	8.96209	5.88732e-39	peaks1_common	331.338	750.662		Supercontig_12.2	1695025	1696015	NCU16539		8.37216	9.55202	1.17986	green
Supercontig_12.6	47075	48564	745	-1.1797	10.368	8.45108e-99	peaks1_common	878.063	1989.07		Supercontig_12.6	47074	48564	NCU07130		9.77818	10.9579	1.1797	green
Supercontig_12.4	64616	66946	1165.5	-1.17697	9.16109	5.47655e-44	peaks1_common	380.725	860.824		Supercontig_12.4	64615	66946	NCU09649		8.57261	9.74957	1.17697	green
Supercontig_12.7	4114674	4116555	941	-1.16785	8.55614	2.47916e-29	peaks1_common	251.117	564.201		Supercontig_12.7	4114673	4116555	NCU05870		7.97222	9.14007	1.16785	green
Supercontig_12.1	9694632	9697675	1522	-1.16263	10.5437	5.24197e-108	peaks1_common	997.674	2233.44		Supercontig_12.1	9694631	9697675	NCU08641		9.96242	11.1251	1.16263	green
Supercontig_12.7	1032187	1034789	1301.5	-1.16095	8.59304	1.06169e-29	peaks1_common	258.239	577.435		Supercontig_12.7	1032186	1034789	NCU10052		8.01256	9.17351	1.16095	green
Supercontig_12.7	4126668	4129056	1194.5	-1.15991	8.91335	2.13697e-36	peaks1_common	322.554	720.725		Supercontig_12.7	4126667	4129056	NCU11306		8.3334	9.4933	1.15991	green
Supercontig_12.7	4021777	4024008	1116	-1.1551	8.41633	2.53675e-26	peaks1_common	228.933	509.833		Supercontig_12.7	4021776	4024008	NCU05842		7.83878	8.99388	1.1551	green
Supercontig_12.2	1693425	1694798	687	-1.15432	9.52829	4.49173e-54	peaks1_common	494.947	1101.65		Supercontig_12.2	1693424	1694798	NCU16538		8.95113	10.1054	1.15432	green
Supercontig_12.1	93474	98954	2740.5	-1.15342	10.0223	5.12059e-75	peaks1_common	697.283	1551.04		Supercontig_12.1	93473	98954	NCU08049		9.4456	10.599	1.15342	green
Supercontig_12.2	1696239	1696830	296	-1.15285	8.64964	1.67669e-30	peaks1_common	269.327	598.856		Supercontig_12.2	1696238	1696830	NCU16540		8.07322	9.22606	1.15285	green
Supercontig_12.6	4072537	4077061	2262.5	-1.13007	8.46225	3.79494e-26	peaks1_common	238.396	521.775		Supercontig_12.6	4072536	4077061	NCU05013		7.89722	9.02729	1.13007	green
Supercontig_12.6	37287	39731	1222.5	-1.13001	10.1712	9.96277e-80	peaks1_common	779.365	1705.72		Supercontig_12.6	37286	39731	NCU07133		9.60616	10.7362	1.13001	green
Supercontig_12.4	148910	150567	829	-1.12796	8.64968	3.39576e-29	peaks1_common	271.668	593.729		Supercontig_12.4	148909	150567	NCU07583		8.0857	9.21366	1.12796	green
Supercontig_12.7	4110659	4111130	236	-1.12593	10.0972	2.62851e-75	peaks1_common	741.465	1618.19		Supercontig_12.7	4110658	4111130	NCU17283		9.53423	10.6602	1.12593	green
Supercontig_12.1	9639998	9641977	990	-1.12553	8.18119	1.29189e-21	peaks1_common	196.505	428.739		Supercontig_12.1	9639997	9641977	NCU08626		7.61843	8.74396	1.12553	green
Supercontig_12.6	60950	64452	1751.5	-1.12071	8.39886	1.16441e-24	peaks1_common	228.889	497.728		Supercontig_12.6	60949	64452	NCU07125		7.83851	8.95922	1.12071	green
Supercontig_12.1	54882	57945	1532	-1.11663	8.66899	4.44419e-29	peaks1_common	276.412	599.371		Supercontig_12.1	54881	57945	NCU09912		8.11067	9.2273	1.11663	green
Supercontig_12.3	4607735	4609300	783	-1.11244	8.77843	6.58153e-31	peaks1_common	298.629	645.669		Supercontig_12.3	4607734	4609300	NCU08193		8.22221	9.33465	1.11244	green
Supercontig_12.2	4386697	4388109	706.5	-1.11149	8.4189	1.51373e-24	peaks1_common	232.834	503.08		Supercontig_12.2	4386696	4388109	NCU09470		7.86316	8.97465	1.11149	green
Supercontig_12.6	43007	44579	786.5	-1.10915	9.04908	1.47541e-36	peaks1_common	360.662	778.015		Supercontig_12.6	43006	44579	NCU17057		8.49451	9.60365	1.10915	green
Supercontig_12.3	276773	277640	434	-1.10491	10.1037	5.76282e-73	peaks1_common	750.243	1613.66		Supercontig_12.3	276772	277640	NCU09182		9.55122	10.6561	1.10491	green
Supercontig_12.4	33357	36590	1617	-1.09882	9.41605	1.04553e-45	peaks1_common	466.793	999.775		Supercontig_12.4	33356	36590	NCU09642		8.86664	9.96546	1.09882	green
Supercontig_12.2	4380944	4386281	2669	-1.09671	7.79241	3.06223e-16	peaks1_common	151.593	324.206		Supercontig_12.2	4380943	4386281	NCU09469		7.24406	8.34076	1.09671	green
Supercontig_12.4	5905743	5906842	550	-1.09198	9.51748	2.77533e-48	peaks1_common	501.981	1070.06		Supercontig_12.4	5905742	5906842	NCU05163		8.97149	10.0635	1.09198	green
Supercontig_12.1	7836568	7839994	1713.5	-1.09135	8.34863	7.33941e-23	peaks1_common	223.318	475.831		Supercontig_12.1	7836567	7839994	NCU00611		7.80296	8.89431	1.09135	green
Supercontig_12.4	5937270	5937656	193.5	-1.08698	10.1905	9.08602e-75	peaks1_common	801.756	1703.16		Supercontig_12.4	5937269	5937656	NCU16905		9.64702	10.734	1.08698	green
Supercontig_12.4	61716	64332	1308.5	-1.08208	9.6838	4.66893e-53	peaks1_common	565.256	1196.7		Supercontig_12.4	61715	64332	NCU09648		9.14276	10.2248	1.08208	green
Supercontig_12.3	334730	338173	1722	-1.07964	8.32728	4.81021e-22	peaks1_common	220.932	466.942		Supercontig_12.3	334729	338173	NCU10002		7.78746	8.8671	1.07964	green
Supercontig_12.3	5215762	5218271	1255	-1.07918	8.57783	1.07813e-25	peaks1_common	262.876	555.414		Supercontig_12.3	5215761	5218271	NCU08767		8.03824	9.11742	1.07918	green
Supercontig_12.4	5903497	5905410	957	-1.07434	10.2604	9.77075e-77	peaks1_common	845.259	1779.91		Supercontig_12.4	5903496	5905410	NCU05165		9.72325	10.7976	1.07434	green
Supercontig_12.3	5184556	5189005	2225	-1.07229	8.29225	2.08595e-21	peaks1_common	216.182	454.581		Supercontig_12.3	5184555	5189005	NCU08776		7.7561	8.8284	1.07229	green
Supercontig_12.1	122928	128314	2693.5	-1.06735	8.43517	4.06144e-23	peaks1_common	239.104	501.062		Supercontig_12.1	122927	128314	NCU08056		7.90149	8.96885	1.06735	green
Supercontig_12.3	80729	81529	400.5	-1.06504	8.65515	2.36001e-26	peaks1_common	278.712	583.128		Supercontig_12.3	80728	81529	NCU09508		8.12263	9.18767	1.06504	green
Supercontig_12.6	67268	70868	1800.5	-1.05989	8.53727	2.52067e-24	peaks1_common	257.303	536.418		Supercontig_12.6	67267	70868	NCU07123		8.00732	9.06721	1.05989	green
Supercontig_12.1	49237	52949	1856.5	-1.05779	9.73359	2.14013e-52	peaks1_common	590.051	1228.33		Supercontig_12.1	49236	52949	NCU09910		9.20469	10.2625	1.05779	green
Supercontig_12.1	134927	137208	1141	-1.05646	9.51546	2.4157e-45	peaks1_common	507.488	1055.48		Supercontig_12.1	134926	137208	NCU08060		8.98723	10.0437	1.05646	green
Supercontig_12.6	4020109	4020971	431.5	-1.05494	9.6306	8.73082e-49	peaks1_common	549.94	1142.57		Supercontig_12.6	4020108	4020971	NCU17150		9.10313	10.1581	1.05494	green
Supercontig_12.3	338279	340718	1220	-1.05315	8.78992	2.65533e-28	peaks1_common	307.266	637.594		Supercontig_12.3	338278	340718	NCU10003		8.26334	9.31649	1.05315	green
Supercontig_12.1	2027524	2029510	993.5	-1.04766	8.0582	8.80156e-18	peaks1_common	185.384	383.22		Supercontig_12.1	2027523	2029510	NCU16346		7.53437	8.58203	1.04766	green
Supercontig_12.3	4478037	4480191	1077.5	-1.047	7.80408	2.82552e-15	peaks1_common	155.479	321.256		Supercontig_12.3	4478036	4480191	NCU07532		7.28058	8.32758	1.047	green
Supercontig_12.3	5221629	5223943	1157.5	-1.04684	8.67033	5.35741e-26	peaks1_common	283.442	585.591		Supercontig_12.3	5221628	5223943	NCU08766		8.14691	9.19375	1.04684	green
Supercontig_12.5	6366073	6370076	2002	-1.04672	9.54648	1.59254e-45	peaks1_common	520.271	1074.79		Supercontig_12.5	6366072	6370076	NCU07168		9.02312	10.0698	1.04672	green
Supercontig_12.2	19764	23982	2109.5	-1.04476	10.2875	5.32821e-74	peaks1_common	870.144	1795.13		Supercontig_12.2	19763	23982	NCU09629		9.76511	10.8099	1.04476	green
Supercontig_12.5	5958543	5960559	1008.5	-1.04266	8.73914	1.00429e-26	peaks1_common	297.72	613.309		Supercontig_12.5	5958542	5960559	NCU09852		8.21781	9.26047	1.04266	green
Supercontig_12.3	60158	61810	826.5	-1.04229	8.43196	4.30629e-22	peaks1_common	240.654	495.625		Supercontig_12.3	60157	61810	NCU09510		7.91081	8.95311	1.04229	green
Supercontig_12.2	41526	42883	679	-1.03461	9.98674	2.1891e-59	peaks1_common	708.898	1452.22		Supercontig_12.2	41525	42883	NCU09617		9.46944	10.504	1.03461	green
Supercontig_12.4	75152	76252	550.5	-1.03269	9.41667	9.81394e-41	peaks1_common	477.821	977.542		Supercontig_12.4	75151	76252	NCU09653		8.90033	9.93301	1.03269	green
Supercontig_12.7	4119240	4120946	853.5	-1.03202	8.43148	7.79659e-22	peaks1_common	241.431	493.7		Supercontig_12.7	4119239	4120946	NCU05872		7.91547	8.94749	1.03202	green
Supercontig_12.2	57518	58796	639.5	-1.02909	9.03993	8.43566e-32	peaks1_common	368.465	751.941		Supercontig_12.2	57517	58796	NCU09611		8.52538	9.55448	1.02909	green
Supercontig_12.5	5961716	5963287	786	-1.02835	8.83939	8.56055e-28	peaks1_common	320.73	654.19		Supercontig_12.5	5961715	5963287	NCU09853		8.32521	9.35356	1.02835	green
Supercontig_12.1	62094	62950	428.5	-1.02689	10.0232	5.69987e-60	peaks1_common	728.985	1485.4		Supercontig_12.1	62093	62950	NCU09914		9.50975	10.5366	1.02689	green
Supercontig_12.2	1688554	1689417	432	-1.02634	9.9809	2.74339e-58	peaks1_common	708.061	1442.21		Supercontig_12.2	1688553	1689417	NCU05470		9.46773	10.4941	1.02634	green
Supercontig_12.3	4920042	4922392	1175.5	-1.02608	8.4932	3.22531e-22	peaks1_common	252.504	514.219		Supercontig_12.3	4920041	4922392	NCU08559		7.98016	9.00624	1.02608	green
Supercontig_12.1	34981	39245	2132.5	-1.02601	10.9525	1.03461e-111	peaks1_common	1388.71	2827.94		Supercontig_12.1	34980	39245	NCU09906		10.4395	11.4655	1.02601	green
Supercontig_12.3	212893	217716	2412	-1.02505	8.68726	3.71612e-25	peaks1_common	288.962	588.046		Supercontig_12.3	212892	217716	NCU09162		8.17474	9.19979	1.02505	green
Supercontig_12.7	958434	959436	501.5	-1.02361	9.1825	2.91562e-34	peaks1_common	407.511	828.47		Supercontig_12.7	958433	959436	NCU09574		8.6707	9.69431	1.02361	green
Supercontig_12.3	5111604	5114534	1465.5	-1.02126	8.60388	1.04011e-23	peaks1_common	273.093	554.295		Supercontig_12.3	5111603	5114534	NCU08791		8.09325	9.11451	1.02126	green
Supercontig_12.7	4109283	4110535	626.5	-1.01864	10.4565	6.16273e-79	peaks1_common	987.18	2000.04		Supercontig_12.7	4109282	4110535	NCU17282		9.94717	10.9658	1.01864	green
Supercontig_12.3	341949	343583	817.5	-1.0143	10.6057	1.27815e-86	peaks1_common	1096.42	2214.69		Supercontig_12.3	341948	343583	NCU10004		10.0986	11.1129	1.0143	green
Supercontig_12.2	4336877	4338852	988	-1.01389	8.00378	3.36005e-16	peaks1_common	180.623	364.74		Supercontig_12.2	4336876	4338852	NCU09757		7.49684	8.51073	1.01389	green
Supercontig_12.3	277684	279201	759	-1.01278	11.0022	9.88342e-113	peaks1_common	1443.9	2913.5		Supercontig_12.3	277683	279201	NCU09183		10.4958	11.5085	1.01278	green
Supercontig_12.3	578383	579271	444.5	-1.01197	8.67267	2.25807e-24	peaks1_common	287.354	579.496		Supercontig_12.3	578382	579271	NCU05705		8.16669	9.17865	1.01197	green
Supercontig_12.7	27574	31375	1901	-1.00728	9.60639	6.43558e-44	peaks1_common	549.795	1105.15		Supercontig_12.7	27573	31375	NCU11409		9.10275	10.11	1.00728	green
Supercontig_12.4	5904592	5905524	466.5	-1.00697	9.90225	1.94963e-53	peaks1_common	675.01	1356.56		Supercontig_12.4	5904591	5905524	NCU05164		9.39877	10.4057	1.00697	green
Supercontig_12.3	9257	12729	1736.5	-0.99791	11.4957	4.09142e-153	peaks1_common	2043.44	4080.97		Supercontig_12.3	9256	12729	NCU09526		10.9968	11.9947	0.99791	gray
Supercontig_12.1	2003874	2006615	1371	-0.99536	7.73343	2.54587e-13	peaks1_common	150.722	300.477		Supercontig_12.1	2003873	2006615	NCU01924		7.23575	8.23111	0.99536	gray
Supercontig_12.7	4060795	4065660	2433	-0.99354	8.38329	1.22162e-19	peaks1_common	236.635	471.156		Supercontig_12.7	4060794	4065660	NCU05854		7.88652	8.88006	0.99354	gray
Supercontig_12.5	6257836	6259251	708	-0.99338	9.15864	5.00446e-32	peaks1_common	405.048	806.388		Supercontig_12.5	6257835	6259251	NCU07201		8.66195	9.65533	0.99338	gray
Supercontig_12.6	4156628	4157329	351	-0.99274	9.20857	3.42445e-33	peaks1_common	419.405	834.599		Supercontig_12.6	4156627	4157329	NCU12156		8.7122	9.70494	0.99274	gray
Supercontig_12.4	3028114	3030831	1359	-0.9927	8.41151	4.61149e-20	peaks1_common	241.38	480.323		Supercontig_12.4	3028113	3030831	NCU06286		7.91516	8.90786	0.9927	gray
Supercontig_12.3	109551	114307	2378.5	-0.99042	8.1241	1.00792e-16	peaks1_common	197.936	393.252		Supercontig_12.3	109550	114307	NCU09500		7.62889	8.61931	0.99042	gray
Supercontig_12.1	6262725	6265061	1168.5	-0.9884	8.47858	1.03829e-20	peaks1_common	253.243	502.43		Supercontig_12.1	6262724	6265061	NCU07355		7.98438	8.97278	0.9884	gray
Supercontig_12.2	149767	150765	499.5	-0.98817	9.93838	1.07062e-52	peaks1_common	696.652	1381.93		Supercontig_12.2	149766	150765	NCU03581		9.44429	10.4325	0.98817	gray
Supercontig_12.3	48622	51780	1579.5	-0.9881	8.21211	1.42686e-17	peaks1_common	210.556	417.653		Supercontig_12.3	48621	51780	NCU09514		7.71806	8.70616	0.9881	gray
Supercontig_12.4	5939000	5940994	997.5	-0.98683	10.8285	3.04412e-95	peaks1_common	1291.72	2559.96		Supercontig_12.4	5938999	5940994	NCU10040		10.3351	11.3219	0.98683	gray
Supercontig_12.2	1685914	1686735	411	-0.98643	10.2377	5.30866e-64	peaks1_common	857.763	1699.47		Supercontig_12.2	1685913	1686735	NCU05469		9.74444	10.7309	0.98643	gray
Supercontig_12.1	137593	139980	1194	-0.98318	8.24699	8.01686e-18	peaks1_common	216.077	427.144		Supercontig_12.1	137592	139980	NCU08062		7.7554	8.73858	0.98318	gray
Supercontig_12.6	48620	49910	645.5	-0.98099	10.6937	5.04119e-86	peaks1_common	1178.88	2326.9		Supercontig_12.6	48619	49910	NCU12065		10.2032	11.1842	0.98099	gray
Supercontig_12.5	6047047	6049161	1057.5	-0.98059	10.5432	9.68721e-78	peaks1_common	1062.21	2096.03		Supercontig_12.5	6047046	6049161	NCU09958		10.0529	11.0334	0.98059	gray
Supercontig_12.3	5194710	5195727	509	-0.97832	8.71413	1.59785e-23	peaks1_common	299.201	589.476		Supercontig_12.3	5194709	5195727	NCU08773		8.22497	9.20329	0.97832	gray
Supercontig_12.5	6049654	6050526	436.5	-0.97811	9.71454	1.42624e-44	peaks1_common	598.615	1179.2		Supercontig_12.5	6049653	6050526	NCU09959		9.22549	10.2036	0.97811	gray
Supercontig_12.5	5957371	5958636	633	-0.97342	9.54218	1.3212e-39	peaks1_common	532.069	1044.71		Supercontig_12.5	5957370	5958636	NCU09851		9.05547	10.0289	0.97342	gray
Supercontig_12.3	202081	204463	1191.5	-0.95754	8.50732	5.83104e-20	peaks1_common	261.117	507.087		Supercontig_12.3	202080	204463	NCU09159		8.02855	8.98609	0.95754	gray
Supercontig_12.6	4130211	4132481	1135.5	-0.95118	9.23606	5.24904e-31	peaks1_common	433.675	838.49		Supercontig_12.6	4130210	4132481	NCU12152		8.76047	9.71165	0.95118	gray
Supercontig_12.5	6276335	6277766	716	-0.94855	8.47627	2.39427e-19	peaks1_common	256.354	494.746		Supercontig_12.5	6276334	6277766	NCU07194		8.002	8.95054	0.94855	gray
Supercontig_12.2	4339141	4341666	1263	-0.94332	7.7803	1.38948e-12	peaks1_common	158.533	304.851		Supercontig_12.2	4339140	4341666	NCU09756		7.30864	8.25196	0.94332	gray
Supercontig_12.1	9659335	9661155	910.5	-0.94202	7.9984	2.46162e-14	peaks1_common	184.489	354.443		Supercontig_12.1	9659334	9661155	NCU08633		7.52739	8.46941	0.94202	gray
Supercontig_12.7	4120568	4123484	1458.5	-0.93894	8.08641	5.40991e-15	peaks1_common	196.303	376.337		Supercontig_12.7	4120567	4123484	NCU05873		7.61694	8.55588	0.93894	gray
Supercontig_12.3	14104	16140	1018.5	-0.93836	11.136	3.14716e-106	peaks1_common	1625.66	3115.33		Supercontig_12.3	14103	16140	NCU09524		10.6668	11.6052	0.93836	gray
Supercontig_12.3	5189937	5191069	566.5	-0.93721	8.63867	6.8423e-21	peaks1_common	288.028	551.522		Supercontig_12.3	5189936	5191069	NCU08775		8.17007	9.10727	0.93721	gray
Supercontig_12.4	5901294	5902573	640	-0.9367	9.1496	1.37681e-28	peaks1_common	410.503	785.763		Supercontig_12.4	5901293	5902573	NCU05166		8.68125	9.61795	0.9367	gray
Supercontig_12.3	489746	493079	1667	-0.93649	8.26997	1.192e-16	peaks1_common	223.128	427.036		Supercontig_12.3	489745	493079	NCU05683		7.80172	8.73822	0.93649	gray
Supercontig_12.2	4323535	4325867	1166.5	-0.93405	8.06057	1.19096e-14	peaks1_common	193.146	369.03		Supercontig_12.2	4323534	4325867	NCU09759		7.59355	8.52759	0.93405	gray
Supercontig_12.2	30257	33086	1415	-0.92292	9.88004	1.26027e-44	peaks1_common	684.345	1297.48		Supercontig_12.2	30256	33086	NCU16498		9.41858	10.3415	0.92292	gray
Supercontig_12.6	4127958	4128488	265.5	-0.92048	8.57761	1.92589e-19	peaks1_common	277.697	525.61		Supercontig_12.6	4127957	4128488	NCU12150		8.11737	9.03785	0.92048	gray
Supercontig_12.4	5895542	5898068	1263.5	-0.91907	8.16619	3.88677e-15	peaks1_common	208.898	395.004		Supercontig_12.4	5895541	5898068	NCU05168		7.70666	8.62572	0.91907	gray
Supercontig_12.5	6407702	6409565	932	-0.91826	8.53472	7.54552e-19	peaks1_common	269.771	509.822		Supercontig_12.5	6407701	6409565	NCU07153		8.07559	8.99385	0.91826	gray
Supercontig_12.3	4526737	4527663	463.5	-0.9177	8.63668	5.56567e-20	peaks1_common	289.582	547.05		Supercontig_12.3	4526736	4527663	NCU07520		8.17783	9.09553	0.9177	gray
Supercontig_12.3	4606355	4606862	254	-0.91738	9.80783	3.75839e-42	peaks1_common	652.186	1231.77		Supercontig_12.3	4606354	4606862	NCU08192		9.34914	10.2665	0.91738	gray
Supercontig_12.3	78706	80592	943.5	-0.91539	8.249	9.3962e-16	peaks1_common	221.522	417.808		Supercontig_12.3	78705	80592	NCU09509		7.79131	8.70669	0.91539	gray
Supercontig_12.5	6093555	6097221	1833.5	-0.91303	9.33399	7.78658e-31	peaks1_common	470.312	885.596		Supercontig_12.5	6093554	6097221	NCU07246		8.87748	9.7905	0.91303	gray
Supercontig_12.1	9630616	9631366	375.5	-0.91126	8.63736	7.2746e-20	peaks1_common	290.366	546.088		Supercontig_12.1	9630615	9631366	NCU08622		8.18173	9.09299	0.91126	gray
Supercontig_12.2	1714661	1716206	773	-0.91029	8.3167	3.19535e-16	peaks1_common	232.575	437.108		Supercontig_12.2	1714660	1716206	NCU05483		7.86156	8.77185	0.91029	gray
Supercontig_12.5	6374429	6376228	900	-0.90768	8.26043	1.13843e-15	peaks1_common	223.881	420.007		Supercontig_12.5	6374428	6376228	NCU07165		7.80659	8.71427	0.90768	gray
Supercontig_12.5	6369760	6371492	866.5	-0.90594	8.85381	2.26754e-22	peaks1_common	337.991	633.315		Supercontig_12.5	6369759	6371492	NCU07167		8.40084	9.30678	0.90594	gray
Supercontig_12.5	6372027	6374229	1101.5	-0.90393	7.96046	3.96225e-13	peaks1_common	182.088	340.716		Supercontig_12.5	6372026	6374229	NCU07166		7.50849	8.41242	0.90393	gray
Supercontig_12.7	4088313	4093421	2554.5	-0.90219	8.75006	6.65315e-21	peaks1_common	314.947	588.605		Supercontig_12.7	4088312	4093421	NCU05861		8.29896	9.20116	0.90219	gray
Supercontig_12.1	2024678	2026493	908	-0.90081	8.43859	3.35413e-17	peaks1_common	253.912	474.083		Supercontig_12.1	2024677	2026493	NCU11201		7.98818	8.88899	0.90081	gray
Supercontig_12.2	4309382	4310944	781.5	-0.89893	8.16682	1.24326e-14	peaks1_common	210.453	392.428		Supercontig_12.2	4309381	4310944	NCU09762		7.71736	8.61629	0.89893	gray
Supercontig_12.7	4118242	4119151	455	-0.89635	8.53204	4.10315e-18	peaks1_common	271.323	505.026		Supercontig_12.7	4118241	4119151	NCU17284		8.08386	8.98021	0.89635	gray
Supercontig_12.4	51826	55019	1597	-0.89626	9.12626	5.91298e-26	peaks1_common	409.616	762.392		Supercontig_12.4	51825	55019	NCU09644		8.67813	9.57439	0.89626	gray
Supercontig_12.7	4188691	4189713	511.5	-0.895	8.42209	7.98652e-17	peaks1_common	251.531	467.749		Supercontig_12.7	4188690	4189713	NCU05893		7.97459	8.86959	0.895	gray
Supercontig_12.5	6405455	6407902	1224	-0.89288	9.2739	1.66709e-28	peaks1_common	454.287	843.556		Supercontig_12.5	6405454	6407902	NCU07154		8.82746	9.72034	0.89288	gray
Supercontig_12.2	4417858	4422646	2394.5	-0.88767	7.82863	8.7478e-12	peaks1_common	167.126	309.215		Supercontig_12.2	4417857	4422646	NCU09482		7.38479	8.27247	0.88767	gray
Supercontig_12.3	5106792	5109785	1497	-0.88522	8.45298	8.20437e-17	peaks1_common	257.847	476.255		Supercontig_12.3	5106791	5109785	NCU08792		8.01037	8.89559	0.88522	gray
Supercontig_12.7	4102556	4104802	1123.5	-0.88224	8.14202	4.99995e-14	peaks1_common	208.066	383.515		Supercontig_12.7	4102555	4104802	NCU05865		7.7009	8.58314	0.88224	gray
Supercontig_12.2	4317187	4321936	2375	-0.87956	8.87395	1.76813e-21	peaks1_common	345.89	636.374		Supercontig_12.2	4317186	4321936	NCU09760		8.43417	9.31373	0.87956	gray
Supercontig_12.5	6342372	6342776	202.5	-0.87598	9.02323	1.76685e-23	peaks1_common	384.074	704.873		Supercontig_12.5	6342371	6342776	NCU07177		8.58524	9.46122	0.87598	gray
Supercontig_12.2	4466318	4468439	1061	-0.87449	10.7263	1.63598e-70	peaks1_common	1251.16	2293.83		Supercontig_12.2	4466317	4468439	NCU09494		10.2891	11.1635	0.87449	gray
Supercontig_12.2	4330822	4336743	2961	-0.87442	8.09364	2.32994e-13	peaks1_common	201.751	369.864		Supercontig_12.2	4330821	4336743	NCU09758		7.65643	8.53085	0.87442	gray
Supercontig_12.2	1680517	1682564	1024	-0.87432	10.5558	7.5589e-63	peaks1_common	1111.77	2038.03		Supercontig_12.2	1680516	1682564	NCU05466		10.1186	10.993	0.87432	gray
Supercontig_12.6	4070783	4072452	835	-0.87323	8.7994	2.41315e-20	peaks1_common	329.192	603		Supercontig_12.6	4070782	4072452	NCU05014		8.36278	9.23602	0.87323	gray
Supercontig_12.5	6393167	6395707	1270.5	-0.87124	8.87304	4.19116e-21	peaks1_common	346.67	634.141		Supercontig_12.5	6393166	6395707	NCU07159		8.43742	9.30866	0.87124	gray
Supercontig_12.6	4138769	4139696	464	-0.87084	8.31613	4.42643e-15	peaks1_common	235.684	431.002		Supercontig_12.6	4138768	4139696	NCU12154		7.88071	8.75155	0.87084	gray
Supercontig_12.5	6293016	6295011	998	-0.87004	8.29625	7.35548e-15	peaks1_common	232.523	424.986		Supercontig_12.5	6293015	6295011	NCU07190		7.86123	8.73127	0.87004	gray
Supercontig_12.3	4797220	4798623	702	-0.86217	11.3941	2.00953e-107	peaks1_common	1996.15	3628.54		Supercontig_12.3	4797219	4798623	NCU08258		10.963	11.8252	0.86217	gray
Supercontig_12.5	6162382	6164419	1019	-0.86144	10.209	1.34244e-48	peaks1_common	878.142	1595.45		Supercontig_12.5	6162381	6164419	NCU07232		9.77831	10.6397	0.86144	gray
Supercontig_12.2	1677867	1678593	363.5	-0.85964	10.9755	1.80646e-80	peaks1_common	1494.73	2712.32		Supercontig_12.2	1677866	1678593	NCU05463		10.5457	11.4053	0.85964	gray
Supercontig_12.2	4307029	4308402	687	-0.85395	8.21779	7.22056e-14	peaks1_common	221.447	400.252		Supercontig_12.2	4307028	4308402	NCU11417		7.79081	8.64477	0.85395	gray
Supercontig_12.3	5141444	5142693	625	-0.8531	8.47167	5.01102e-16	peaks1_common	264.133	477.124		Supercontig_12.3	5141443	5142693	NCU11289		8.04512	8.89822	0.8531	gray
Supercontig_12.4	81973	84357	1192.5	-0.8525	8.95956	1.44522e-21	peaks1_common	370.495	668.976		Supercontig_12.4	81972	84357	NCU11414		8.53331	9.38581	0.8525	gray
Supercontig_12.4	29178	31245	1034	-0.8506	10.6472	1.72174e-63	peaks1_common	1194.25	2153.53		Supercontig_12.4	29177	31245	NCU09641		10.2219	11.0725	0.8506	gray
Supercontig_12.7	52905	56222	1659	-0.84844	9.00625	5.7724e-22	peaks1_common	383.22	690.008		Supercontig_12.7	52904	56222	NCU17154		8.58203	9.43047	0.84844	gray
Supercontig_12.7	4043300	4044897	799	-0.84682	8.30876	2.03684e-14	peaks1_common	236.443	425.251		Supercontig_12.7	4043299	4044897	NCU05848		7.88535	8.73217	0.84682	gray
Supercontig_12.7	4076847	4080943	2048.5	-0.84666	7.78041	1.13647e-10	peaks1_common	163.946	294.83		Supercontig_12.7	4076846	4080943	NCU05858		7.35708	8.20374	0.84666	gray
Supercontig_12.3	5235112	5236734	811.5	-0.84555	8.90559	1.7891e-20	peaks1_common	357.752	642.862		Supercontig_12.3	5235111	5236734	NCU10567		8.48282	9.32836	0.84555	gray
Supercontig_12.2	4305219	4306415	598.5	-0.83874	8.47299	1.61407e-15	peaks1_common	265.694	475.19		Supercontig_12.2	4305218	4306415	NCU11416		8.05362	8.89236	0.83874	gray
Supercontig_12.3	601856	603223	684	-0.83783	9.39528	2.87871e-27	peaks1_common	503.68	900.258		Supercontig_12.3	601855	603223	NCU05713		8.97637	9.81419	0.83783	gray
Supercontig_12.5	6417640	6419476	918.5	-0.83086	11.3466	1.09845e-96	peaks1_common	1952.52	3473.03		Supercontig_12.5	6417639	6419476	NCU07149		10.9311	11.762	0.83086	gray
Supercontig_12.3	425598	426575	489	-0.83005	10.344	1.61507e-49	peaks1_common	974.842	1733.02		Supercontig_12.3	425597	426575	NCU05669		9.92902	10.7591	0.83005	gray
Supercontig_12.3	4543887	4545698	906	-0.8297	8.06528	4.43847e-12	peaks1_common	200.913	357.087		Supercontig_12.3	4543886	4545698	NCU07517		7.65043	8.48013	0.8297	gray
Supercontig_12.7	4065594	4068717	1562	-0.8296	7.83929	1.31397e-10	peaks1_common	171.789	305.301		Supercontig_12.7	4065593	4068717	NCU05855		7.42449	8.25409	0.8296	gray
Supercontig_12.7	932225	933187	481.5	-0.82878	9.79793	1.36505e-34	peaks1_common	667.924	1186.35		Supercontig_12.7	932224	933187	NCU09582		9.38354	10.2123	0.82878	gray
Supercontig_12.5	6058227	6058877	325.5	-0.82441	10.232	2.24911e-45	peaks1_common	903.772	1600.41		Supercontig_12.5	6058226	6058877	NCU09964		9.81982	10.6442	0.82441	gray
Supercontig_12.3	119585	121352	884	-0.82427	8.83922	8.21533e-19	peaks1_common	344.196	609.446		Supercontig_12.3	119584	121352	NCU09498		8.42709	9.25135	0.82427	gray
Supercontig_12.5	6159884	6161878	997.5	-0.82029	9.91666	1.05638e-36	peaks1_common	727.355	1284.33		Supercontig_12.5	6159883	6161878	NCU07233		9.50652	10.3268	0.82029	gray
Supercontig_12.6	3950402	3952344	971.5	-0.81912	7.95433	4.62797e-11	peaks1_common	186.725	329.444		Supercontig_12.6	3950401	3952344	NCU05043		7.54477	8.36389	0.81912	gray
Supercontig_12.3	4942498	4944487	995	-0.81902	8.72948	2.13125e-17	peaks1_common	319.566	563.781		Supercontig_12.3	4942497	4944487	NCU08555		8.31997	9.13899	0.81902	gray
Supercontig_12.2	4263002	4264847	923	-0.81832	8.18419	1.21881e-12	peaks1_common	219.037	386.239		Supercontig_12.2	4263001	4264847	NCU09777		7.77503	8.59335	0.81832	gray
Supercontig_12.5	6138742	6139556	407.5	-0.81535	9.37236	1.36657e-25	peaks1_common	499.619	879.192		Supercontig_12.5	6138741	6139556	NCU07237		8.96468	9.78004	0.81535	gray
Supercontig_12.2	4302440	4303922	741.5	-0.81453	8.23834	7.20026e-13	peaks1_common	227.713	400.485		Supercontig_12.2	4302439	4303922	NCU09764		7.83108	8.64561	0.81453	gray
Supercontig_12.7	4147275	4151054	1890	-0.81381	8.67949	8.1358e-17	peaks1_common	309.24	543.597		Supercontig_12.7	4147274	4151054	NCU05880		8.27258	9.0864	0.81381	gray
Supercontig_12.5	6035121	6038202	1541	-0.81285	10.3881	5.09711e-49	peaks1_common	1011.11	1776.2		Supercontig_12.5	6035120	6038202	NCU09954		9.98172	10.7946	0.81285	gray
Supercontig_12.2	3599113	3601130	1009	-0.81053	8.29514	2.61679e-13	peaks1_common	237.186	415.99		Supercontig_12.2	3599112	3601130	NCU08447		7.88987	8.70041	0.81053	gray
Supercontig_12.4	71005	73122	1059	-0.80984	9.8742	6.96226e-35	peaks1_common	708.822	1242.58		Supercontig_12.4	71004	73122	NCU09651		9.46928	10.2791	0.80984	gray
Supercontig_12.3	35785	37135	675.5	-0.80281	8.19182	2.30528e-12	peaks1_common	221.385	386.206		Supercontig_12.3	35784	37135	NCU09517		7.79041	8.59323	0.80281	gray
Supercontig_12.3	167660	169481	911	-0.80278	9.8657	3.80852e-34	peaks1_common	706.385	1232.26		Supercontig_12.3	167659	169481	NCU09151		9.46431	10.2671	0.80278	gray
Supercontig_12.3	5042690	5045534	1422.5	-0.79602	8.41209	9.61652e-14	peaks1_common	258.511	448.853		Supercontig_12.3	5042689	5045534	NCU08526		8.01408	8.8101	0.79602	gray
Supercontig_12.7	4133694	4136992	1649.5	-0.79201	7.56874	1.12115e-08	peaks1_common	144.281	249.82		Supercontig_12.7	4133693	4136992	NCU05876		7.17274	7.96474	0.79201	gray
Supercontig_12.6	4005251	4008412	1581	-0.78961	7.93934	1.95707e-10	peaks1_common	186.694	322.721		Supercontig_12.6	4005250	4008412	NCU11219		7.54453	8.33414	0.78961	gray
Supercontig_12.6	4102833	4106597	1882.5	-0.78376	7.84218	8.87336e-10	peaks1_common	174.89	301.092		Supercontig_12.6	4102832	4106597	NCU05007		7.4503	8.23406	0.78376	gray
Supercontig_12.3	4610804	4613436	1316.5	-0.78154	8.19636	7.42788e-12	peaks1_common	223.726	384.577		Supercontig_12.3	4610803	4613436	NCU08194		7.80559	8.58713	0.78154	gray
Supercontig_12.3	205022	206533	756	-0.77986	8.51439	3.80912e-14	peaks1_common	279.066	479.146		Supercontig_12.3	205021	206533	NCU09160		8.12446	8.90432	0.77986	gray
Supercontig_12.5	6344542	6348844	2151.5	-0.77838	8.3764	5.62265e-13	peaks1_common	253.74	435.217		Supercontig_12.5	6344541	6348844	NCU07175		7.98721	8.76559	0.77838	gray
Supercontig_12.2	4292155	4294497	1171.5	-0.77636	8.5884	1.05344e-14	peaks1_common	294.112	503.756		Supercontig_12.2	4292154	4294497	NCU09767		8.20022	8.97658	0.77636	gray
Supercontig_12.3	4626605	4626922	159	-0.77553	10.2353	1.16642e-40	peaks1_common	921.273	1577.05		Supercontig_12.3	4626604	4626922	NCU08200		9.84749	10.623	0.77553	gray
Supercontig_12.7	933250	936171	1461	-0.77495	9.57414	1.52727e-26	peaks1_common	582.722	997.114		Supercontig_12.7	933249	936171	NCU09581		9.18667	9.96161	0.77495	gray
Supercontig_12.2	4424721	4426911	1095.5	-0.77459	8.22803	6.59881e-12	peaks1_common	229.243	392.167		Supercontig_12.2	4424720	4426911	NCU09483		7.84074	8.61532	0.77459	gray
Supercontig_12.7	4015746	4018478	1366.5	-0.77353	8.16662	1.81039e-11	peaks1_common	219.771	375.686		Supercontig_12.7	4015745	4018478	NCU05840		7.77985	8.55339	0.77353	gray
Supercontig_12.7	4101039	4102549	755.5	-0.77302	8.34187	1.18941e-12	peaks1_common	248.2	424.135		Supercontig_12.7	4101038	4102549	NCU05864		7.95536	8.72838	0.77302	gray
Supercontig_12.2	1683362	1684546	592.5	-0.76754	10.2575	1.91846e-40	peaks1_common	938.179	1597.12		Supercontig_12.2	1683361	1684546	NCU05467		9.87372	10.6413	0.76754	gray
Supercontig_12.7	4189886	4191488	801.5	-0.76741	7.88486	1.06193e-09	peaks1_common	181.164	308.38		Supercontig_12.7	4189885	4191488	NCU05894		7.50116	8.26857	0.76741	gray
Supercontig_12.5	6237807	6238634	414	-0.76622	10.7681	2.70115e-56	peaks1_common	1337.2	2274.32		Supercontig_12.5	6237806	6238634	NCU07208		10.385	11.1512	0.76622	gray
Supercontig_12.2	66707	68637	965.5	-0.76468	8.43967	3.19222e-13	peaks1_common	266.378	452.574		Supercontig_12.2	66706	68637	NCU09608		8.05733	8.82201	0.76468	gray
Supercontig_12.5	6431522	6433447	963	-0.7645	11.4974	3.74671e-91	peaks1_common	2218.19	3768.23		Supercontig_12.5	6431521	6433447	NCU07144		11.1152	11.8797	0.7645	gray
Supercontig_12.2	4265050	4266907	929	-0.7636	8.25196	9.2888e-12	peaks1_common	233.967	397.211		Supercontig_12.2	4265049	4266907	NCU16599		7.87016	8.63376	0.7636	gray
Supercontig_12.3	472740	474151	706	-0.76304	9.40016	3.83961e-23	peaks1_common	518.658	880.195		Supercontig_12.3	472739	474151	NCU05681		9.01864	9.78168	0.76304	gray
Supercontig_12.7	4026131	4028777	1323.5	-0.76279	8.03128	2.02484e-10	peaks1_common	200.838	340.775		Supercontig_12.7	4026130	4028777	NCU05843		7.64989	8.41268	0.76279	gray
Supercontig_12.1	9477567	9479404	919	-0.75873	7.8033	3.68181e-09	peaks1_common	171.722	290.555		Supercontig_12.1	9477566	9479404	NCU09230		7.42394	8.18266	0.75873	gray
Supercontig_12.7	4219863	4221690	914	-0.7586	9.83173	5.03902e-30	peaks1_common	700.592	1185.29		Supercontig_12.7	4219862	4221690	NCU05900		9.45243	10.211	0.7586	gray
Supercontig_12.7	4013051	4014106	528	-0.75788	8.33418	3.00027e-12	peaks1_common	248.179	419.672		Supercontig_12.7	4013050	4014106	NCU05839		7.95524	8.71312	0.75788	gray
Supercontig_12.4	5912162	5913850	844.5	-0.75649	10.5333	4.21757e-47	peaks1_common	1140.19	1926.2		Supercontig_12.4	5912161	5913850	NCU05160		10.1551	10.9115	0.75649	gray
Supercontig_12.3	4495888	4497562	837.5	-0.75399	8.32298	5.57406e-12	peaks1_common	246.592	415.866		Supercontig_12.3	4495887	4497562	NCU07526		7.94598	8.69997	0.75399	gray
Supercontig_12.2	1667288	1671125	1919	-0.75221	7.88339	2.25651e-09	peaks1_common	181.936	306.447		Supercontig_12.2	1667287	1671125	NCU05459		7.50729	8.25949	0.75221	gray
Supercontig_12.7	4046603	4048953	1175.5	-0.75159	8.30315	6.76043e-12	peaks1_common	243.429	409.848		Supercontig_12.7	4046602	4048953	NCU05849		7.92735	8.67895	0.75159	gray
Supercontig_12.1	5557665	5562248	2292	-0.74957	7.11242	2.55788e-06	peaks1_common	106.716	179.421		Supercontig_12.1	5557664	5562248	NCU08378		6.73763	7.48721	0.74957	gray
Supercontig_12.5	6354743	6358025	1641.5	-0.7486	8.04095	3.64654e-10	peaks1_common	203.185	341.384		Supercontig_12.5	6354742	6358025	NCU07172		7.66665	8.41525	0.7486	gray
Supercontig_12.7	70827	73411	1292.5	-0.7484	8.47364	5.45134e-13	peaks1_common	274.268	460.75		Supercontig_12.7	70826	73411	NCU09287		8.09944	8.84784	0.7484	gray
Supercontig_12.6	4094300	4096906	1303.5	-0.74713	7.93589	1.42849e-09	peaks1_common	189.011	317.245		Supercontig_12.6	4094299	4096906	NCU05010		7.56233	8.30945	0.74713	gray
Supercontig_12.2	4370827	4373297	1235.5	-0.74703	7.89935	2.04536e-09	peaks1_common	184.29	309.3		Supercontig_12.2	4370826	4373297	NCU09466		7.52583	8.27286	0.74703	gray
Supercontig_12.6	64566	66655	1045	-0.74251	10.3338	7.02315e-40	peaks1_common	997.792	1669.39		Supercontig_12.6	64565	66655	NCU07124		9.9626	10.7051	0.74251	gray
Supercontig_12.4	56877	58715	919.5	-0.74083	9.20929	1.43456e-19	peaks1_common	457.896	765.206		Supercontig_12.4	56876	58715	NCU09646		8.83887	9.5797	0.74083	gray
Supercontig_12.7	4095532	4097565	1017	-0.73935	8.06945	4.00013e-10	peaks1_common	207.904	347.08		Supercontig_12.7	4095531	4097565	NCU05862		7.69978	8.43913	0.73935	gray
Supercontig_12.7	937792	940484	1346.5	-0.73732	9.26663	4.12007e-20	peaks1_common	477.041	795.264		Supercontig_12.7	937791	940484	NCU09580		8.89797	9.63529	0.73732	gray
Supercontig_12.5	6379932	6380604	336.5	-0.73699	9.84047	8.73413e-29	peaks1_common	710.148	1183.6		Supercontig_12.5	6379931	6380604	NCU07163		9.47197	10.209	0.73699	gray
Supercontig_12.3	4794104	4794463	180	-0.73667	11.3023	1.62091e-74	peaks1_common	1956.4	3260		Supercontig_12.3	4794103	4794463	NCU08256		10.934	11.6707	0.73667	gray
Supercontig_12.2	3739991	3740964	487	-0.73527	7.63843	4.38978e-08	peaks1_common	154.428	257.078		Supercontig_12.2	3739990	3740964	NCU08703		7.2708	8.00606	0.73527	gray
Supercontig_12.4	8110	19545	5718	-0.73481	11.2203	4.12441e-70	peaks1_common	1849.51	3077.91		Supercontig_12.4	8109	19545	NCU09637		10.8529	11.5877	0.73481	gray
Supercontig_12.7	4049256	4051524	1134.5	-0.73373	7.77066	1.18476e-08	peaks1_common	169.342	281.604		Supercontig_12.7	4049255	4051524	NCU05850		7.4038	8.13752	0.73373	gray
Supercontig_12.1	9692170	9693340	585.5	-0.73353	10.7098	6.51837e-50	peaks1_common	1298.84	2159.58		Supercontig_12.1	9692169	9693340	NCU08640		10.343	11.0765	0.73353	gray
Supercontig_12.4	5837767	5841680	1957	-0.73343	7.9993	1.02553e-09	peaks1_common	198.444	329.93		Supercontig_12.4	5837766	5841680	NCU05182		7.63259	8.36602	0.73343	gray
Supercontig_12.5	6311484	6313200	858.5	-0.73316	8.36686	7.91299e-12	peaks1_common	256.05	425.625		Supercontig_12.5	6311483	6313200	NCU07184		8.00028	8.73344	0.73316	gray
Supercontig_12.3	176509	177234	363	-0.72949	8.67682	6.43583e-14	peaks1_common	317.822	526.966		Supercontig_12.3	176508	177234	NCU09154		8.31208	9.04157	0.72949	gray
Supercontig_12.3	29171	30638	734	-0.72824	10.7188	1.53071e-49	peaks1_common	1309.35	2169.08		Supercontig_12.3	29170	30638	NCU09519		10.3546	11.0829	0.72824	gray
Supercontig_12.7	31558	33772	1107.5	-0.72644	8.18859	1.74538e-10	peaks1_common	226.815	375.276		Supercontig_12.7	31557	33772	NCU11410		7.82537	8.55181	0.72644	gray
Supercontig_12.3	4888366	4894772	3203.5	-0.72598	7.89481	5.32712e-09	peaks1_common	185.056	306.087		Supercontig_12.3	4888365	4894772	NCU08565		7.53182	8.2578	0.72598	gray
Supercontig_12.5	6239638	6241091	727	-0.7254	10.5599	2.71148e-44	peaks1_common	1173.99	1941.02		Supercontig_12.5	6239637	6241091	NCU07207		10.1972	10.9226	0.7254	gray
Supercontig_12.1	6269599	6270811	606.5	-0.72491	8.05663	9.14983e-10	peaks1_common	207.099	342.292		Supercontig_12.1	6269598	6270811	NCU07353		7.69417	8.41908	0.72491	gray
Supercontig_12.3	5254966	5258478	1756.5	-0.7249	11.1954	2.88289e-67	peaks1_common	1824.13	3014.89		Supercontig_12.3	5254965	5258478	NCU08755		10.833	11.5579	0.7249	gray
Supercontig_12.5	6308115	6309716	801	-0.72488	8.31741	2.84904e-11	peaks1_common	248.133	410.105		Supercontig_12.5	6308114	6309716	NCU07186		7.95497	8.67985	0.72488	gray
Supercontig_12.4	5898045	5898932	444	-0.72276	8.6443	1.57521e-13	peaks1_common	311.464	514.02		Supercontig_12.4	5898044	5898932	NCU16902		8.28292	9.00568	0.72276	gray
Supercontig_12.6	4039323	4040275	476.5	-0.71232	8.15099	4.82017e-10	peaks1_common	222.064	363.837		Supercontig_12.6	4039322	4040275	NCU05022		7.79483	8.50715	0.71232	gray
Supercontig_12.4	169007	171785	1389.5	-0.70934	9.17304	7.64893e-18	peaks1_common	451.434	738.119		Supercontig_12.4	169006	171785	NCU16721		8.81837	9.52771	0.70934	gray
Supercontig_12.3	4717092	4719148	1028.5	-0.70667	8.60269	9.20151e-13	peaks1_common	304.301	496.629		Supercontig_12.3	4717091	4719148	NCU08231		8.24935	8.95602	0.70667	gray
Supercontig_12.7	34072	38571	2250	-0.70632	8.1273	9.6292e-10	peaks1_common	218.902	357.168		Supercontig_12.7	34071	38571	NCU09297		7.77414	8.48046	0.70632	gray
Supercontig_12.7	4131122	4132341	610	-0.70392	7.99002	5.0531e-09	peaks1_common	199.198	324.479		Supercontig_12.7	4131121	4132341	NCU05875		7.63806	8.34198	0.70392	gray
Supercontig_12.2	94846	96218	686.5	-0.70007	8.8914	1.12945e-14	peaks1_common	372.569	605.27		Supercontig_12.2	94845	96218	NCU09596		8.54136	9.24143	0.70007	gray
Supercontig_12.4	5824125	5827967	1921.5	-0.69514	8.50775	1.0156e-11	peaks1_common	286.061	463.145		Supercontig_12.4	5824124	5827967	NCU05185		8.16018	8.85532	0.69514	gray
Supercontig_12.3	4500624	4503723	1550	-0.69477	8.27429	2.31254e-10	peaks1_common	243.353	393.897		Supercontig_12.3	4500623	4503723	NCU07525		7.9269	8.62167	0.69477	gray
Supercontig_12.2	4410678	4411546	434.5	-0.69147	8.56075	5.25178e-12	peaks1_common	297.143	479.865		Supercontig_12.2	4410677	4411546	NCU09479		8.21501	8.90648	0.69147	gray
Supercontig_12.4	4301691	4304060	1185	-0.68833	8.07062	4.43048e-09	peaks1_common	211.785	341.274		Supercontig_12.4	4301690	4304060	NCU07343		7.72645	8.41479	0.68833	gray
Supercontig_12.1	144649	149497	2424.5	-0.68475	7.84287	4.5457e-08	peaks1_common	181.081	291.075		Supercontig_12.1	144648	149497	NCU08064		7.5005	8.18524	0.68475	gray
Supercontig_12.4	144861	147831	1485.5	-0.68212	9.6248	6.56062e-22	peaks1_common	623.281	1000.05		Supercontig_12.4	144860	147831	NCU07582		9.28374	9.96586	0.68212	gray
Supercontig_12.7	4035638	4038540	1451.5	-0.68116	7.79654	8.06027e-08	peaks1_common	175.577	281.525		Supercontig_12.7	4035637	4038540	NCU05846		7.45596	8.13712	0.68116	gray
Supercontig_12.7	4136993	4138282	645	-0.68047	8.81531	1.96123e-13	peaks1_common	355.838	570.287		Supercontig_12.7	4136992	4138282	NCU17285		8.47507	9.15554	0.68047	gray
Supercontig_12.3	4492470	4494975	1253	-0.67803	8.14378	2.95199e-09	peaks1_common	223.598	357.747		Supercontig_12.3	4492469	4494975	NCU07527		7.80477	8.4828	0.67803	gray
Supercontig_12.3	1670900	1672327	714	-0.67695	7.5103	7.98928e-07	peaks1_common	144.19	230.524		Supercontig_12.3	1670899	1672327	NCU06505		7.17183	7.84878	0.67695	gray
Supercontig_12.3	4706647	4708897	1125.5	-0.67653	9.06704	1.83558e-15	peaks1_common	424.251	678.077		Supercontig_12.3	4706646	4708897	NCU08229		8.72877	9.40531	0.67653	gray
Supercontig_12.7	571611	575488	1939	-0.67517	7.72069	1.75837e-07	peaks1_common	166.931	266.552		Supercontig_12.7	571610	575488	NCU06866		7.3831	8.05827	0.67517	gray
Supercontig_12.6	4159484	4162424	1470.5	-0.67415	11.512	3.13771e-72	peaks1_common	2311.95	3689.08		Supercontig_12.6	4159483	4162424	NCU04991		11.1749	11.849	0.67415	gray
Supercontig_12.7	4019080	4021194	1057.5	-0.67214	8.20062	2.06245e-09	peaks1_common	233.059	371.364		Supercontig_12.7	4019079	4021194	NCU05841		7.86455	8.53669	0.67214	gray
Supercontig_12.4	5891781	5894885	1552.5	-0.67163	9.27375	2.90918e-17	peaks1_common	490.441	781.209		Supercontig_12.4	5891780	5894885	NCU05169		8.93793	9.60956	0.67163	gray
Supercontig_12.4	31868	33628	880.5	-0.67099	9.99365	1.11705e-26	peaks1_common	807.968	1286.42		Supercontig_12.4	31867	33628	NCU10572		9.65816	10.3291	0.67099	gray
Supercontig_12.5	6395937	6399064	1564	-0.67037	8.50709	3.97929e-11	peaks1_common	288.396	458.976		Supercontig_12.5	6395936	6399064	NCU07158		8.1719	8.84228	0.67037	gray
Supercontig_12.3	4884046	4888035	1995	-0.67028	7.82294	7.65673e-08	peaks1_common	179.495	285.645		Supercontig_12.3	4884045	4888035	NCU08566		7.4878	8.15808	0.67028	gray
Supercontig_12.6	948327	951606	1640	-0.66915	7.12337	1.44017e-05	peaks1_common	110.568	175.819		Supercontig_12.6	948326	951606	NCU04824		6.7888	7.45794	0.66915	gray
Supercontig_12.7	1002874	1007545	2336	-0.66751	7.68248	3.27713e-07	peaks1_common	163	258.897		Supercontig_12.7	1002873	1007545	NCU09559		7.34872	8.01623	0.66751	gray
Supercontig_12.6	1305	3239	967.5	-0.66733	11.673	6.77062e-79	peaks1_common	2591.07	4114.97		Supercontig_12.6	1304	3239	NCU07143		11.3393	12.0067	0.66733	gray
Supercontig_12.5	5948287	5949755	734.5	-0.66656	8.54038	3.98995e-11	peaks1_common	295.518	469.07		Supercontig_12.5	5948286	5949755	NCU09848		8.2071	8.87366	0.66656	gray
Supercontig_12.1	9686294	9688284	995.5	-0.66514	10.5233	9.14196e-37	peaks1_common	1168.74	1853.3		Supercontig_12.1	9686293	9688284	NCU08638		10.1907	10.8559	0.66514	gray
Supercontig_12.6	4148887	4150053	583.5	-0.66471	9.83604	7.88856e-24	peaks1_common	725.929	1150.78		Supercontig_12.6	4148886	4150053	NCU04996		9.50368	10.1684	0.66471	gray
Supercontig_12.4	11075	19163	4044.5	-0.66456	11.1512	2.30753e-55	peaks1_common	1806.4	2863.29		Supercontig_12.4	11074	19163	NCU09638		10.8189	11.4835	0.66456	gray
Supercontig_12.3	4517914	4522071	2079	-0.6637	7.81327	1.41942e-07	peaks1_common	178.703	283.091		Supercontig_12.3	4517913	4522071	NCU07521		7.48142	8.14512	0.6637	gray
Supercontig_12.2	1697090	1699283	1097	-0.6637	8.21092	2.28586e-09	peaks1_common	235.416	372.932		Supercontig_12.2	1697089	1699283	NCU16541		7.87907	8.54277	0.6637	gray
Supercontig_12.7	989341	993463	2061.5	-0.66199	7.67271	3.8269e-07	peaks1_common	162.21	256.658		Supercontig_12.7	989340	993463	NCU09564		7.34172	8.0037	0.66199	gray
Supercontig_12.1	9567487	9572967	2740.5	-0.66149	7.72052	3.42557e-07	peaks1_common	167.704	265.26		Supercontig_12.1	9567486	9572967	NCU08604		7.38978	8.05127	0.66149	gray
Supercontig_12.3	4564044	4568610	2283.5	-0.66069	8.42909	2.26836e-10	peaks1_common	274.135	433.364		Supercontig_12.3	4564043	4568610	NCU07513		8.09874	8.75944	0.66069	gray
Supercontig_12.5	6329937	6331980	1022	-0.66066	8.33448	7.36939e-10	peaks1_common	256.737	405.852		Supercontig_12.5	6329936	6331980	NCU10165		8.00415	8.66481	0.66066	gray
Supercontig_12.7	4098319	4099978	830	-0.65773	8.7513	2.66939e-12	peaks1_common	343.088	541.255		Supercontig_12.7	4098318	4099978	NCU05863		8.42243	9.08017	0.65773	gray
Supercontig_12.2	8927	11029	1051.5	-0.65756	11.4537	2.61122e-66	peaks1_common	2233.24	3522.73		Supercontig_12.2	8926	11029	NCU09634		11.1249	11.7825	0.65756	gray
Supercontig_12.4	59114	61311	1099	-0.65731	8.41062	3.58683e-10	peaks1_common	270.965	427.35		Supercontig_12.4	59113	61311	NCU09647		8.08196	8.73927	0.65731	gray
Supercontig_12.4	1667	3325	829.5	-0.65709	11.8288	5.76206e-85	peaks1_common	2896.88	4568.09		Supercontig_12.4	1666	3325	NCU10285		11.5003	12.1574	0.65709	gray
Supercontig_12.2	4341633	4343327	847.5	-0.65669	7.97172	4.28884e-08	peaks1_common	199.933	315.187		Supercontig_12.2	4341632	4343327	NCU09755		7.64337	8.30006	0.65669	gray
Supercontig_12.6	24458	25894	718.5	-0.65513	11.1703	1.33113e-54	peaks1_common	1836.46	2891.99		Supercontig_12.6	24457	25894	NCU11342		10.8427	11.4978	0.65513	gray
Supercontig_12.3	4598536	4599913	689	-0.65462	10.0514	1.91497e-26	peaks1_common	845.728	1331.35		Supercontig_12.3	4598535	4599913	NCU08189		9.72405	10.3787	0.65462	gray
Supercontig_12.6	77231	80697	1733.5	-0.65362	8.51435	1.10204e-10	peaks1_common	291.538	458.621		Supercontig_12.6	77230	80697	NCU07120		8.18754	8.84116	0.65362	gray
Supercontig_12.2	1676725	1677559	417.5	-0.65342	11.0549	2.42149e-50	peaks1_common	1696.35	2668.18		Supercontig_12.2	1676724	1677559	NCU05462		10.7282	11.3816	0.65342	gray
Supercontig_12.2	4279017	4281309	1146.5	-0.65263	8.03629	2.42709e-08	peaks1_common	209.379	329.151		Supercontig_12.2	4279016	4281309	NCU09771		7.70998	8.3626	0.65263	gray
Supercontig_12.2	3595673	3597687	1007.5	-0.65259	7.70922	4.88709e-07	peaks1_common	166.91	262.38		Supercontig_12.2	3595672	3597687	NCU08448		7.38293	8.03551	0.65259	gray
Supercontig_12.5	5877441	5878832	696	-0.65052	7.59538	1.07318e-06	peaks1_common	154.356	242.298		Supercontig_12.5	5877440	5878832	NCU08972		7.27012	7.92064	0.65052	gray
Supercontig_12.1	6369135	6371279	1072.5	-0.64924	8.01269	3.83685e-08	peaks1_common	206.224	323.43		Supercontig_12.1	6369134	6371279	NCU09876		7.68807	8.33731	0.64924	gray
Supercontig_12.2	3712644	3718148	2752.5	-0.64801	8.42265	4.15755e-10	peaks1_common	274.116	429.542		Supercontig_12.2	3712643	3718148	NCU08696		8.09864	8.74665	0.64801	gray
Supercontig_12.3	5137235	5141089	1927.5	-0.6464	8.15295	1.22022e-08	peaks1_common	227.504	356.103		Supercontig_12.3	5137234	5141089	NCU11288		7.82975	8.47615	0.6464	gray
Supercontig_12.7	75521	78828	1654	-0.6461	8.69788	1.41378e-11	peaks1_common	331.952	519.482		Supercontig_12.7	75520	78828	NCU09285		8.37483	9.02093	0.6461	gray
Supercontig_12.6	9191	11740	1275	-0.64563	11.0736	7.65376e-50	peaks1_common	1723.14	2695.72		Supercontig_12.6	9190	11740	NCU07140		10.7508	11.3965	0.64563	gray
Supercontig_12.1	45332	48154	1411.5	-0.64511	10.4665	1.41549e-33	peaks1_common	1131.4	1769.35		Supercontig_12.1	45331	48154	NCU09909		10.1439	10.789	0.64511	gray
Supercontig_12.1	9649955	9651509	777.5	-0.64223	10.0033	8.59018e-25	peaks1_common	821.516	1282.17		Supercontig_12.1	9649954	9651509	NCU08630		9.68215	10.3244	0.64223	gray
Supercontig_12.4	94753	98413	1830.5	-0.64195	8.66088	2.6008e-11	peaks1_common	324.012	505.601		Supercontig_12.4	94752	98413	NCU09658		8.3399	8.98185	0.64195	gray
Supercontig_12.2	4269308	4270336	514.5	-0.64064	8.08873	2.50507e-08	peaks1_common	218.034	339.92		Supercontig_12.2	4269307	4270336	NCU09775		7.76841	8.40905	0.64064	gray
Supercontig_12.3	4508505	4513146	2321	-0.64028	7.70297	7.28033e-07	peaks1_common	166.899	260.134		Supercontig_12.3	4508504	4513146	NCU07523		7.38283	8.02311	0.64028	gray
Supercontig_12.6	78240	94699	8230	-0.63901	9.48713	4.94027e-18	peaks1_common	575.082	895.553		Supercontig_12.6	78239	94699	NCU07119		9.16763	9.80664	0.63901	gray
Supercontig_12.1	53114	54518	702.5	-0.63775	8.35361	1.71396e-09	peaks1_common	262.238	408.017		Supercontig_12.1	53113	54518	NCU09911		8.03473	8.67248	0.63775	gray
Supercontig_12.5	6207513	6211631	2059.5	-0.63758	9.18177	6.76276e-15	peaks1_common	465.611	724.358		Supercontig_12.5	6207512	6211631	NCU07221		8.86298	9.50056	0.63758	gray
Supercontig_12.1	6480932	6483194	1131.5	-0.63629	7.52832	2.6838e-06	peaks1_common	148.074	230.155		Supercontig_12.1	6480931	6483194	NCU00988		7.21018	7.84646	0.63629	gray
Supercontig_12.7	3218962	3221181	1110	-0.63574	7.43345	5.82826e-06	peaks1_common	138.677	215.467		Supercontig_12.7	3218961	3221181	NCU02240		7.11558	7.75132	0.63574	gray
Supercontig_12.7	56583	58151	784.5	-0.63564	8.02222	6.56355e-08	peaks1_common	208.572	324.043		Supercontig_12.7	56582	58151	NCU17155		7.7044	8.34004	0.63564	gray
Supercontig_12.3	114942	118431	1745	-0.6353	7.824	3.63843e-07	peaks1_common	181.818	282.411		Supercontig_12.3	114941	118431	NCU09499		7.50635	8.14165	0.6353	gray
Supercontig_12.6	3991859	3992933	537.5	-0.63387	8.15655	1.89693e-08	peaks1_common	229.065	355.446		Supercontig_12.6	3991858	3992933	NCU05030		7.83961	8.47349	0.63387	gray
Supercontig_12.3	627911	634467	3278.5	-0.63382	7.7132	7.62154e-07	peaks1_common	168.463	261.399		Supercontig_12.3	627910	634467	NCU05721		7.39629	8.03011	0.63382	gray
Supercontig_12.6	20386	21842	728.5	-0.63288	10.3873	8.68357e-31	peaks1_common	1075.54	1667.79		Supercontig_12.6	20385	21842	NCU07138		10.0708	10.7037	0.63288	gray
Supercontig_12.3	4795017	4795815	399.5	-0.63019	11.3684	9.44078e-58	peaks1_common	2125.04	3289.07		Supercontig_12.3	4795016	4795815	NCU08257		11.0533	11.6835	0.63019	gray
Supercontig_12.6	3092610	3097787	2589	-0.63001	7.9863	1.14336e-07	peaks1_common	203.84	315.458		Supercontig_12.6	3092609	3097787	NCU06011		7.6713	8.3013	0.63001	gray
Supercontig_12.4	164293	167050	1379	-0.62973	8.11415	3.15525e-08	peaks1_common	222.751	344.656		Supercontig_12.4	164292	167050	NCU07590		7.79928	8.42901	0.62973	gray
Supercontig_12.3	5239371	5241715	1172.5	-0.62777	8.09775	3.34712e-08	peaks1_common	220.382	340.529		Supercontig_12.3	5239370	5241715	NCU08761		7.78387	8.41163	0.62777	gray
Supercontig_12.6	26616	28474	929.5	-0.62773	10.7894	2.94202e-39	peaks1_common	1423.8	2199.97		Supercontig_12.6	26615	28474	NCU17055		10.4755	11.1033	0.62773	gray
Supercontig_12.2	4310718	4311708	495.5	-0.62669	8.32166	3.63116e-09	peaks1_common	257.48	397.553		Supercontig_12.2	4310717	4311708	NCU09761		8.00831	8.635	0.62669	gray
Supercontig_12.3	5036277	5038689	1206.5	-0.62669	8.32166	3.63116e-09	peaks1_common	257.48	397.553		Supercontig_12.3	5036276	5038689	NCU10276		8.00831	8.635	0.62669	gray
Supercontig_12.2	51943	53778	918	-0.6234	10.5041	2.41481e-32	peaks1_common	1170.09	1802.52		Supercontig_12.2	51942	53778	NCU09613		10.1924	10.8158	0.6234	gray
Supercontig_12.2	4213495	4216857	1681.5	-0.62259	7.59577	2.5885e-06	peaks1_common	155.9	240.029		Supercontig_12.2	4213494	4216857	NCU16595		7.28447	7.90706	0.62259	gray
Supercontig_12.1	9602211	9605091	1440.5	-0.62234	8.00453	1.07624e-07	peaks1_common	206.982	318.622		Supercontig_12.1	9602210	9605091	NCU08612		7.69336	8.3157	0.62234	gray
Supercontig_12.1	113613	117165	1776.5	-0.62231	8.06368	7.39126e-08	peaks1_common	215.647	331.953		Supercontig_12.1	113612	117165	NCU08054		7.75253	8.37484	0.62231	gray
Supercontig_12.2	92166	93129	482	-0.62148	8.8235	9.26155e-12	peaks1_common	365.255	561.927		Supercontig_12.2	92165	93129	NCU09597		8.51276	9.13424	0.62148	gray
Supercontig_12.1	91324	92593	635	-0.62094	10.9834	1.25817e-43	peaks1_common	1632.57	2510.69		Supercontig_12.1	91323	92593	NCU10501		10.6729	11.2939	0.62094	gray
Supercontig_12.5	6414593	6416401	904.5	-0.61914	11.2906	3.98553e-53	peaks1_common	2021.22	3104.51		Supercontig_12.5	6414592	6416401	NCU07150		10.981	11.6001	0.61914	gray
Supercontig_12.5	6235622	6236738	558.5	-0.61854	11.1846	1.87721e-49	peaks1_common	1878.48	2884.07		Supercontig_12.5	6235621	6236738	NCU07209		10.8754	11.4939	0.61854	gray
Supercontig_12.5	5929164	5929957	397	-0.61799	8.24927	1.53795e-08	peaks1_common	245.618	376.959		Supercontig_12.5	5929163	5929957	NCU09845		7.94028	8.55826	0.61799	gray
Supercontig_12.3	5104134	5106840	1353.5	-0.61626	8.71344	6.30327e-11	peaks1_common	339.04	519.713		Supercontig_12.3	5104133	5106840	NCU08793		8.40531	9.02157	0.61626	gray
Supercontig_12.3	209447	211043	798.5	-0.61438	7.90407	4.17538e-07	peaks1_common	193.593	296.371		Supercontig_12.3	209446	211043	NCU09161		7.59688	8.21126	0.61438	gray
Supercontig_12.1	139966	143960	1997.5	-0.61269	7.76176	1.30874e-06	peaks1_common	175.511	268.375		Supercontig_12.1	139965	143960	NCU08063		7.45542	8.06811	0.61269	gray
Supercontig_12.2	4312939	4316864	1963	-0.61204	8.6702	1.61708e-10	peaks1_common	329.51	503.63		Supercontig_12.2	4312938	4316864	NCU10809		8.36418	8.97622	0.61204	gray
Supercontig_12.6	3910624	3915113	2245	-0.61019	7.82984	7.08462e-07	peaks1_common	184.151	281.099		Supercontig_12.6	3910623	3915113	NCU05051		7.52475	8.13494	0.61019	gray
Supercontig_12.5	5968748	5969817	535	-0.60846	10.0858	8.41577e-24	peaks1_common	880.134	1341.88		Supercontig_12.5	5968747	5969817	NCU09855		9.78158	10.39	0.60846	gray
Supercontig_12.2	4200550	4202684	1067.5	-0.60693	7.82818	8.56249e-07	peaks1_common	184.147	280.459		Supercontig_12.2	4200549	4202684	NCU09350		7.52472	8.13164	0.60693	gray
Supercontig_12.7	978607	983676	2535	-0.60616	7.91737	4.53871e-07	peaks1_common	195.943	298.265		Supercontig_12.7	978606	983676	NCU09566		7.61429	8.22045	0.60616	gray
Supercontig_12.4	5790221	5793688	1734	-0.60329	7.41696	1.25487e-05	peaks1_common	138.651	210.636		Supercontig_12.4	5790220	5793688	NCU05196		7.11532	7.71861	0.60329	gray
Supercontig_12.3	510920	512896	988.5	-0.6031	8.3229	1.30774e-08	peaks1_common	259.817	394.655		Supercontig_12.3	510919	512896	NCU05687		8.02135	8.62445	0.6031	gray
Supercontig_12.7	534714	537221	1254	-0.60077	7.38275	1.62026e-05	peaks1_common	135.52	205.52		Supercontig_12.7	534713	537221	NCU06860		7.08236	7.68313	0.60077	gray
Supercontig_12.7	4054383	4055501	559.5	-0.59777	8.12323	1.17428e-07	peaks1_common	226.654	343.012		Supercontig_12.7	4054382	4055501	NCU05852		7.82435	8.42211	0.59777	gray
Supercontig_12.7	1287974	1289425	726	-0.59761	7.3977	1.68534e-05	peaks1_common	137.082	207.433		Supercontig_12.7	1287973	1289425	NCU10016		7.0989	7.69651	0.59761	gray
Supercontig_12.3	505565	508417	1426.5	-0.59755	7.73457	2.03494e-06	peaks1_common	173.14	261.986		Supercontig_12.3	505564	508417	NCU05686		7.4358	8.03334	0.59755	gray
Supercontig_12.1	4435306	4439402	2048.5	-0.59409	7.46035	1.2198e-05	peaks1_common	143.341	216.376		Supercontig_12.1	4435305	4439402	NCU03070		7.1633	7.7574	0.59409	gray
Supercontig_12.2	1711584	1712163	290	-0.59399	8.34005	1.8562e-08	peaks1_common	263.755	398.116		Supercontig_12.2	1711583	1712163	NCU05481		8.04306	8.63705	0.59399	gray
Supercontig_12.2	4239025	4241456	1216	-0.588	8.2616	4.64027e-08	peaks1_common	250.315	376.264		Supercontig_12.2	4239024	4241456	NCU09358		7.9676	8.5556	0.588	gray
Supercontig_12.3	285490	287797	1154	-0.58744	11.3141	8.10022e-49	peaks1_common	2077.19	3121.15		Supercontig_12.3	285489	287797	NCU09186		11.0204	11.6079	0.58744	gray
Supercontig_12.2	219338	223893	2278	-0.58738	7.79966	2.0029e-06	peaks1_common	181.77	273.112		Supercontig_12.2	219337	223893	NCU03562		7.50597	8.09335	0.58738	gray
Supercontig_12.1	9606408	9606944	268.5	-0.58703	8.04048	3.1936e-07	peaks1_common	214.817	322.688		Supercontig_12.1	9606407	9606944	NCU08613		7.74697	8.334	0.58703	gray
Supercontig_12.5	5092761	5095869	1554.5	-0.58495	7.39948	2.10667e-05	peaks1_common	137.855	206.78		Supercontig_12.5	5092760	5095869	NCU04176		7.107	7.69196	0.58495	gray
Supercontig_12.2	4271243	4272151	454.5	-0.5835	7.79145	2.31412e-06	peaks1_common	180.982	271.197		Supercontig_12.2	4271242	4272151	NCU09774		7.4997	8.0832	0.5835	gray
Supercontig_12.1	4523738	4526134	1198.5	-0.58195	7.48537	1.36925e-05	peaks1_common	146.463	219.237		Supercontig_12.1	4523737	4526134	NCU03095		7.1944	7.77634	0.58195	gray
Supercontig_12.6	621664	625302	1819.5	-0.58121	7.52306	1.10452e-05	peaks1_common	150.379	224.982		Supercontig_12.6	621663	625302	NCU04737		7.23245	7.81367	0.58121	gray
Supercontig_12.5	5473197	5475672	1238	-0.57978	7.90398	1.14472e-06	peaks1_common	195.916	292.82		Supercontig_12.5	5473196	5475672	NCU04278		7.61409	8.19387	0.57978	gray
Supercontig_12.1	130428	132364	968.5	-0.57932	7.95497	8.65828e-07	peaks1_common	202.996	303.306		Supercontig_12.1	130427	132364	NCU08058		7.66531	8.24463	0.57932	gray
Supercontig_12.7	4056218	4058155	969	-0.57821	8.75043	3.98164e-10	peaks1_common	352.462	526.225		Supercontig_12.7	4056217	4058155	NCU05853		8.46133	9.03953	0.57821	gray
Supercontig_12.2	1874216	1878346	2065.5	-0.57645	7.5356	1.19058e-05	peaks1_common	151.942	226.572		Supercontig_12.2	1874215	1878346	NCU06812		7.24738	7.82383	0.57645	gray
Supercontig_12.5	6264753	6266641	944.5	-0.57596	10.3233	5.18844e-25	peaks1_common	1049.35	1564.23		Supercontig_12.5	6264752	6266641	NCU07199		10.0353	10.6112	0.57596	gray
Supercontig_12.6	4158666	4159405	370	-0.57483	11.3936	1.92954e-49	peaks1_common	2204.44	3283.51		Supercontig_12.6	4158665	4159405	NCU04992		11.1062	11.681	0.57483	gray
Supercontig_12.5	6312556	6315790	1617.5	-0.5744	7.92993	1.11038e-06	peaks1_common	199.844	297.579		Supercontig_12.5	6312555	6315790	NCU07182		7.64273	8.21713	0.5744	gray
Supercontig_12.3	192755	197661	2453.5	-0.57284	8.55709	5.80382e-09	peaks1_common	308.83	459.369		Supercontig_12.3	192754	197661	NCU09157		8.27067	8.84351	0.57284	gray
Supercontig_12.4	5869810	5871864	1027.5	-0.57209	10.992	1.03756e-37	peaks1_common	1670.36	2483.29		Supercontig_12.4	5869809	5871864	NCU05175		10.7059	11.278	0.57209	gray
Supercontig_12.7	1350640	1351307	334	-0.57186	11.1209	6.87896e-41	peaks1_common	1826.66	2715.21		Supercontig_12.7	1350639	1351307	NCU09725		10.835	11.4069	0.57186	gray
Supercontig_12.7	4234257	4235509	626.5	-0.57123	11.4643	4.35426e-51	peaks1_common	2318	3444.06		Supercontig_12.7	4234256	4235509	NCU05903		11.1787	11.7499	0.57123	gray
Supercontig_12.7	4151905	4154859	1477.5	-0.57075	7.61937	8.05099e-06	peaks1_common	161.344	239.643		Supercontig_12.7	4151904	4154859	NCU05881		7.33399	7.90474	0.57075	gray
Supercontig_12.5	6023508	6024661	577	-0.56915	11.0631	4.84268e-39	peaks1_common	1756.59	2606.17		Supercontig_12.5	6023507	6024661	NCU09947		10.7786	11.3477	0.56915	gray
Supercontig_12.1	9593787	9598076	2145	-0.56903	7.53925	1.4785e-05	peaks1_common	152.719	226.562		Supercontig_12.1	9593786	9598076	NCU08610		7.25473	7.82377	0.56903	gray
Supercontig_12.5	6269270	6271485	1108	-0.56482	8.14611	3.0584e-07	peaks1_common	232.922	344.538		Supercontig_12.5	6269269	6271485	NCU07197		7.8637	8.42852	0.56482	gray
Supercontig_12.5	6313308	6314212	452.5	-0.56464	8.01849	8.7464e-07	peaks1_common	213.216	315.35		Supercontig_12.5	6313307	6314212	NCU07183		7.73617	8.30081	0.56464	gray
Supercontig_12.5	6272816	6273952	568.5	-0.56312	7.95233	1.53508e-06	peaks1_common	203.766	301.056		Supercontig_12.5	6272815	6273952	NCU07195		7.67077	8.23389	0.56312	gray
Supercontig_12.3	4782348	4783813	733	-0.56132	11.1354	6.15908e-40	peaks1_common	1851.81	2732.56		Supercontig_12.3	4782347	4783813	NCU08252		10.8547	11.416	0.56132	gray
Supercontig_12.3	4748856	4749347	246	-0.55807	11.363	9.41588e-46	peaks1_common	2170.75	3195.99		Supercontig_12.3	4748855	4749347	NCU08239		11.084	11.642	0.55807	gray
Supercontig_12.5	6349278	6351584	1153.5	-0.55766	8.10787	5.00129e-07	peaks1_common	227.392	334.694		Supercontig_12.5	6349277	6351584	NCU07174		7.82904	8.3867	0.55766	gray
Supercontig_12.2	3590878	3594776	1949.5	-0.55746	7.31851	5.96782e-05	peaks1_common	131.578	193.641		Supercontig_12.2	3590877	3594776	NCU08449		7.03978	7.59724	0.55746	gray
Supercontig_12.1	8427444	8429779	1168	-0.55703	7.37709	4.17294e-05	peaks1_common	137.052	201.635		Supercontig_12.1	8427443	8429779	NCU03018		7.09858	7.6556	0.55703	gray
Supercontig_12.3	5192331	5193337	503.5	-0.55635	8.65918	4.05033e-09	peaks1_common	333.376	490.244		Supercontig_12.3	5192330	5193337	NCU08774		8.38101	8.93735	0.55635	gray
Supercontig_12.4	4995336	4998915	1790	-0.55517	7.35959	4.64835e-05	peaks1_common	135.486	199.076		Supercontig_12.4	4995335	4998915	NCU15829		7.082	7.63717	0.55517	gray
Supercontig_12.5	5939365	5943189	1912.5	-0.55441	7.82594	4.11368e-06	peaks1_common	187.239	274.973		Supercontig_12.5	5939364	5943189	NCU09847		7.54873	8.10315	0.55441	gray
Supercontig_12.7	90082	93835	1877	-0.55368	8.2978	1.64235e-07	peaks1_common	259.746	381.262		Supercontig_12.7	90081	93835	NCU09282		8.02096	8.57464	0.55368	gray
Supercontig_12.4	5780841	5786092	2626	-0.55305	7.4395	3.60117e-05	peaks1_common	143.308	210.259		Supercontig_12.4	5780840	5786092	NCU05199		7.16298	7.71602	0.55305	gray
Supercontig_12.5	6123260	6124310	525.5	-0.55279	10.9502	2.13958e-34	peaks1_common	1633.58	2396.34		Supercontig_12.5	6123259	6124310	NCU07242		10.6738	11.2266	0.55279	gray
Supercontig_12.1	1059592	1061748	1078.5	-0.55229	7.33292	6.17009e-05	peaks1_common	133.138	195.235		Supercontig_12.1	1059591	1061748	NCU02155		7.05678	7.60907	0.55229	gray
Supercontig_12.3	5123962	5127013	1526	-0.55097	8.00621	1.43013e-06	peaks1_common	212.413	311.199		Supercontig_12.3	5123961	5127013	NCU08787		7.73072	8.2817	0.55097	gray
Supercontig_12.2	242558	245901	1672	-0.55086	7.43839	3.60117e-05	peaks1_common	143.306	209.938		Supercontig_12.2	242557	245901	NCU03555		7.16296	7.71382	0.55086	gray
Supercontig_12.3	595537	597110	787	-0.55066	8.47376	3.96404e-08	peaks1_common	293.747	430.267		Supercontig_12.3	595536	597110	NCU05710		8.19843	8.74909	0.55066	gray
Supercontig_12.3	4452947	4455926	1490	-0.55065	7.60213	1.94534e-05	peaks1_common	160.542	235.153		Supercontig_12.3	4452946	4455926	NCU07536		7.3268	7.87746	0.55065	gray
Supercontig_12.2	4362259	4366486	2114	-0.55065	7.56647	2.40747e-05	peaks1_common	156.622	229.412		Supercontig_12.2	4362258	4366486	NCU09463		7.29115	7.84179	0.55065	gray
Supercontig_12.6	3250008	3253725	1859	-0.54977	7.38978	5.31156e-05	peaks1_common	138.611	202.906		Supercontig_12.6	3250007	3253725	NCU05972		7.1149	7.66467	0.54977	gray
Supercontig_12.4	2252029	2253953	962.5	-0.54916	7.92842	2.33891e-06	peaks1_common	201.389	294.679		Supercontig_12.4	2252028	2253953	NCU11369		7.65384	8.203	0.54916	gray
Supercontig_12.2	1882815	1885922	1554	-0.5486	7.27931	7.40912e-05	peaks1_common	128.445	187.872		Supercontig_12.2	1882814	1885922	NCU06809		7.00501	7.55361	0.5486	gray
Supercontig_12.1	8059740	8064262	2261.5	-0.5471	7.22493	0.000109471	peaks1_common	123.758	180.829		Supercontig_12.1	8059739	8064262	NCU00545		6.95138	7.49848	0.5471	gray
Supercontig_12.6	4128788	4130072	642.5	-0.54613	8.81628	1.22372e-09	peaks1_common	373.047	544.71		Supercontig_12.6	4128787	4130072	NCU12151		8.54321	9.08934	0.54613	gray
Supercontig_12.3	384222	386039	909	-0.54601	10.7836	2.68521e-30	peaks1_common	1458.87	2130.01		Supercontig_12.3	384221	386039	NCU05655		10.5106	11.0566	0.54601	gray
Supercontig_12.3	4773154	4773851	349	-0.54532	10.8945	1.88369e-32	peaks1_common	1575.81	2299.65		Supercontig_12.3	4773153	4773851	NCU08248		10.6219	11.1672	0.54532	gray
Supercontig_12.7	4052251	4054155	952.5	-0.54473	7.778	8.26088e-06	peaks1_common	181.728	265.095		Supercontig_12.7	4052250	4054155	NCU05851		7.50564	8.05036	0.54473	gray
Supercontig_12.2	995577	999132	1778	-0.54426	7.43504	4.28468e-05	peaks1_common	143.302	208.973		Supercontig_12.2	995576	999132	NCU03355		7.16291	7.70717	0.54426	gray
Supercontig_12.5	5923952	5926233	1141	-0.54356	7.5189	3.42452e-05	peaks1_common	151.915	221.426		Supercontig_12.5	5923951	5926233	NCU09843		7.24712	7.79068	0.54356	gray
Supercontig_12.1	9388500	9391246	1373.5	-0.54345	7.57002	2.40747e-05	peaks1_common	157.4	229.404		Supercontig_12.1	9388499	9391246	NCU09254		7.2983	7.84174	0.54345	gray
Supercontig_12.1	1151	2878	864	-0.54158	11.9056	8.67412e-62	peaks1_common	3179.91	4628.57		Supercontig_12.1	1150	2878	NCU10129		11.6348	12.1763	0.54158	gray
Supercontig_12.4	5941405	5943417	1006.5	-0.53981	10.9993	5.20038e-34	peaks1_common	1697.72	2468.12		Supercontig_12.4	5941404	5943417	NCU10039		10.7294	11.2692	0.53981	gray
Supercontig_12.6	4429	6559	1065.5	-0.53929	9.79922	2.8853e-16	peaks1_common	739.074	1074.06		Supercontig_12.6	4428	6559	NCU07141		9.52957	10.0689	0.53929	gray
Supercontig_12.4	5790091	5791165	537.5	-0.5388	7.76874	9.48495e-06	peaks1_common	180.937	262.858		Supercontig_12.4	5790090	5791165	NCU05197		7.49934	8.03814	0.5388	gray
Supercontig_12.5	6428125	6429262	569	-0.53871	11.5433	3.35228e-48	peaks1_common	2476.27	3597.22		Supercontig_12.5	6428124	6429262	NCU07145		11.274	11.8127	0.53871	gray
Supercontig_12.3	4778023	4779106	542	-0.53765	11.0418	1.0496e-34	peaks1_common	1749.79	2540		Supercontig_12.3	4778022	4779106	NCU08250		10.773	11.3106	0.53765	gray
Supercontig_12.6	2439518	2443955	2219	-0.53747	7.61643	2.46001e-05	peaks1_common	162.883	236.413		Supercontig_12.6	2439517	2443955	NCU10314		7.34769	7.88517	0.53747	gray
Supercontig_12.6	3990814	3991206	196.5	-0.53727	8.29384	3.36663e-07	peaks1_common	260.512	378.061		Supercontig_12.6	3990813	3991206	NCU05031		8.02521	8.56247	0.53727	gray
Supercontig_12.3	91057	92443	693.5	-0.53706	9.74705	1.07884e-15	peaks1_common	713.377	1035.12		Supercontig_12.3	91056	92443	NCU09506		9.47852	10.0156	0.53706	gray
Supercontig_12.2	4230923	4238486	3782	-0.53686	8.23107	4.47685e-07	peaks1_common	249.456	361.913		Supercontig_12.2	4230922	4238486	NCU09357		7.96264	8.4995	0.53686	gray
Supercontig_12.3	5131725	5134722	1499	-0.53683	9.40069	7.45917e-13	peaks1_common	561.163	814.124		Supercontig_12.3	5131724	5134722	NCU08784		9.13227	9.66911	0.53683	gray
Supercontig_12.3	589843	592636	1397	-0.53676	7.97743	2.57564e-06	peaks1_common	209.245	303.554		Supercontig_12.3	589842	592636	NCU10387		7.70905	8.24581	0.53676	gray
Supercontig_12.5	6155250	6157523	1137	-0.53533	10.9255	6.33052e-32	peaks1_common	1615.54	2341.37		Supercontig_12.5	6155249	6157523	NCU07235		10.6578	11.1931	0.53533	gray
Supercontig_12.3	5038904	5040729	913	-0.53504	8.54159	4.06496e-08	peaks1_common	309.559	448.545		Supercontig_12.3	5038903	5040729	NCU11287		8.27407	8.80911	0.53504	gray
Supercontig_12.4	5796280	5799796	1758.5	-0.53405	7.58663	3.13784e-05	peaks1_common	159.743	231.305		Supercontig_12.4	5796279	5799796	NCU05194		7.31961	7.85366	0.53405	gray
Supercontig_12.7	4029322	4030163	421	-0.53257	8.38057	1.73829e-07	peaks1_common	277.104	400.832		Supercontig_12.7	4029321	4030163	NCU05844		8.11428	8.64685	0.53257	gray
Supercontig_12.5	6279014	6280850	918.5	-0.5257	7.95544	4.7413e-06	peaks1_common	206.871	297.819		Supercontig_12.5	6279013	6280850	NCU07193		7.69259	8.21829	0.5257	gray
Supercontig_12.2	1659815	1667071	3628.5	-0.52248	7.64313	2.78165e-05	peaks1_common	166.79	239.581		Supercontig_12.2	1659814	1667071	NCU05458		7.38189	7.90437	0.52248	gray
Supercontig_12.1	2842091	2846420	2165	-0.52242	7.3262	0.000125377	peaks1_common	133.898	192.326		Supercontig_12.1	2842090	2846420	NCU02592		7.06499	7.58741	0.52242	gray
Supercontig_12.3	4524375	4525796	711	-0.52178	8.90769	2.19243e-09	peaks1_common	400.817	575.463		Supercontig_12.3	4524374	4525796	NCU15833		8.6468	9.16858	0.52178	gray
Supercontig_12.6	961734	967229	2748	-0.51984	7.40679	9.64202e-05	peaks1_common	141.717	203.193		Supercontig_12.6	961733	967229	NCU04827		7.14687	7.66671	0.51984	gray
Supercontig_12.3	681888	682855	484	-0.51818	8.37737	3.48735e-07	peaks1_common	277.873	397.955		Supercontig_12.3	681887	682855	NCU10596		8.11828	8.63646	0.51818	gray
Supercontig_12.4	5943563	5945207	822.5	-0.51794	10.6101	9.82836e-25	peaks1_common	1306.2	1870.36		Supercontig_12.4	5943562	5945207	NCU10038		10.3512	10.8691	0.51794	gray
Supercontig_12.3	533360	537779	2210	-0.51598	7.9228	8.12372e-06	peaks1_common	202.926	290.177		Supercontig_12.3	533359	537779	NCU05695		7.66481	8.18079	0.51598	gray
Supercontig_12.6	1370176	1373028	1426.5	-0.51526	7.35587	0.00011596	peaks1_common	137.02	195.836		Supercontig_12.6	1370175	1373028	NCU05600		7.09824	7.6135	0.51526	gray
Supercontig_12.3	4485590	4487967	1189	-0.51515	7.73782	2.41966e-05	peaks1_common	178.558	255.184		Supercontig_12.3	4485589	4487967	NCU07530		7.48025	7.9954	0.51515	gray
Supercontig_12.7	75640	77261	811	-0.51508	8.61399	6.05871e-08	peaks1_common	327.75	468.378		Supercontig_12.7	75639	77261	NCU12058		8.35645	8.87153	0.51508	gray
Supercontig_12.4	85773	87939	1083.5	-0.51461	8.25585	1.08369e-06	peaks1_common	255.742	365.355		Supercontig_12.4	85772	87939	NCU09656		7.99855	8.51315	0.51461	gray
Supercontig_12.4	5787282	5789190	954.5	-0.51288	7.9922	5.68143e-06	peaks1_common	213.155	304.15		Supercontig_12.4	5787281	5789190	NCU05198		7.73576	8.24864	0.51288	gray
Supercontig_12.7	4083979	4086497	1259.5	-0.51244	8.69739	3.01722e-08	peaks1_common	347.572	495.798		Supercontig_12.7	4083978	4086497	NCU05859		8.44117	8.95361	0.51244	gray
Supercontig_12.7	3968826	3972158	1666.5	-0.51198	7.58952	4.50212e-05	peaks1_common	161.292	230.003		Supercontig_12.7	3968825	3972158	NCU05830		7.33353	7.84551	0.51198	gray
Supercontig_12.7	868483	869531	524.5	-0.51017	8.54364	1.41433e-07	peaks1_common	312.683	445.328		Supercontig_12.7	868482	869531	NCU10703		8.28855	8.79872	0.51017	gray
Supercontig_12.1	340059	343487	1714.5	-0.50886	7.27658	0.000182847	peaks1_common	129.98	184.952		Supercontig_12.1	340058	343487	NCU08119		7.02215	7.53101	0.50886	gray
Supercontig_12.1	5039041	5041415	1187.5	-0.50866	7.44814	9.17698e-05	peaks1_common	146.404	208.293		Supercontig_12.1	5039040	5041415	NCU03244		7.19381	7.70247	0.50866	gray
Supercontig_12.7	1264603	1266767	1082.5	-0.50791	7.74677	2.48976e-05	peaks1_common	180.12	256.129		Supercontig_12.7	1264602	1266767	NCU09390		7.49281	8.00072	0.50791	gray
Supercontig_12.3	241501	243748	1124	-0.50582	11.1614	1.63536e-33	peaks1_common	1922.13	2729.29		Supercontig_12.3	241500	243748	NCU09171		10.9085	11.4143	0.50582	gray
Supercontig_12.6	2766824	2769626	1401.5	-0.50566	7.92314	1.15484e-05	peaks1_common	203.701	289.209		Supercontig_12.6	2766823	2769626	NCU03846		7.67031	8.17597	0.50566	gray
Supercontig_12.6	1777056	1782553	2749	-0.50488	7.56472	5.885e-05	peaks1_common	158.934	225.528		Supercontig_12.6	1777055	1782553	NCU10009		7.31228	7.81716	0.50488	gray
Supercontig_12.2	4300570	4301915	673	-0.50428	8.88442	7.10852e-09	peaks1_common	396.803	562.832		Supercontig_12.2	4300569	4301915	NCU09765		8.63228	9.13656	0.50428	gray
Supercontig_12.4	5708273	5714330	3029	-0.50423	7.30851	0.000168921	peaks1_common	133.103	188.788		Supercontig_12.4	5708272	5714330	NCU05219		7.0564	7.56063	0.50423	gray
Supercontig_12.4	5829566	5831498	966.5	-0.50422	10.0116	2.00523e-16	peaks1_common	866.755	1229.37		Supercontig_12.4	5829565	5831498	NCU05184		9.75948	10.2637	0.50422	gray
Supercontig_12.3	4775946	4776607	331	-0.50342	11.3156	1.1262e-36	peaks1_common	2140.7	3034.6		Supercontig_12.3	4775945	4776607	NCU08249		11.0639	11.5673	0.50342	gray
Supercontig_12.4	3960	5883	962	-0.50185	11.5496	2.14783e-42	peaks1_common	2519.14	3567.17		Supercontig_12.4	3959	5883	NCU09635		11.2987	11.8006	0.50185	gray
Supercontig_12.5	6310400	6311736	668.5	-0.50079	8.24883	1.75438e-06	peaks1_common	255.722	361.844		Supercontig_12.5	6310399	6311736	NCU07185		7.99844	8.49922	0.50079	gray
Supercontig_12.6	3851636	3854244	1304.5	-0.50053	8.06881	5.96943e-06	peaks1_common	225.744	319.368		Supercontig_12.6	3851635	3854244	NCU05066		7.81854	8.31908	0.50053	gray
Supercontig_12.5	6271879	6274690	1406	-0.50009	7.92587	1.15484e-05	peaks1_common	204.481	289.198		Supercontig_12.5	6271878	6274690	NCU07196		7.67583	8.17592	0.50009	gray
Supercontig_12.6	3967412	3969517	1053	-0.50009	7.92587	1.15484e-05	peaks1_common	204.481	289.198		Supercontig_12.6	3967411	3969517	NCU05039		7.67583	8.17592	0.50009	gray
Supercontig_12.4	2589570	2592293	1362	-0.49945	7.41228	0.000116648	peaks1_common	143.266	202.532		Supercontig_12.4	2589569	2592293	NCU08271		7.16255	7.662	0.49945	gray
Supercontig_12.3	4461937	4467476	2770	-0.4993	7.93101	1.18753e-05	peaks1_common	205.267	290.151		Supercontig_12.3	4461936	4467476	NCU07534		7.68136	8.18066	0.4993	gray
Supercontig_12.5	5931377	5936664	2644	-0.49922	7.8397	2.21143e-05	peaks1_common	192.684	272.348		Supercontig_12.5	5931376	5936664	NCU09846		7.59009	8.08931	0.49922	gray
Supercontig_12.7	2997623	2999455	916.5	-0.49909	7.38023	0.000148143	peaks1_common	140.136	198.057		Supercontig_12.7	2997622	2999455	NCU02302		7.13069	7.62978	0.49909	gray
Supercontig_12.6	3287408	3290173	1383	-0.49822	7.50328	9.47057e-05	peaks1_common	152.659	215.626		Supercontig_12.6	3287407	3290173	NCU05964		7.25417	7.75239	0.49822	gray
Supercontig_12.7	64250	67930	1840.5	-0.49662	7.82061	2.03702e-05	peaks1_common	190.322	268.526		Supercontig_12.7	64249	67930	NCU09288		7.5723	8.06892	0.49662	gray
Supercontig_12.4	156400	160233	1917	-0.49621	7.97303	1.22747e-05	peaks1_common	211.56	298.406		Supercontig_12.4	156399	160233	NCU07587		7.72492	8.22114	0.49621	gray
Supercontig_12.3	282889	285185	1148.5	-0.49524	10.9087	1.67528e-27	peaks1_common	1619.25	2282.42		Supercontig_12.3	282888	285185	NCU09185		10.6611	11.1564	0.49524	gray
Supercontig_12.1	9195286	9199363	2039	-0.49492	7.49419	0.000108021	peaks1_common	151.874	214.027		Supercontig_12.1	9195285	9199363	NCU02787		7.24673	7.74165	0.49492	gray
Supercontig_12.4	2871615	2874309	1347.5	-0.49442	7.30353	0.000232275	peaks1_common	133.096	187.499		Supercontig_12.4	2871614	2874309	NCU06336		7.05632	7.55074	0.49442	gray
Supercontig_12.1	2478016	2480713	1349	-0.49427	7.22515	0.000265798	peaks1_common	126.064	177.575		Supercontig_12.1	2478015	2480713	NCU02485		6.97802	7.47229	0.49427	gray
Supercontig_12.2	4468613	4470618	1003	-0.49275	11.0449	1.09271e-29	peaks1_common	1781.09	2506.22		Supercontig_12.2	4468612	4470618	NCU09495		10.7985	11.2913	0.49275	gray
Supercontig_12.5	6282213	6285646	1717	-0.49198	8.11399	5.42133e-06	peaks1_common	233.617	328.552		Supercontig_12.5	6282212	6285646	NCU07192		7.868	8.35998	0.49198	gray
Supercontig_12.7	4011458	4012240	391.5	-0.49183	8.03385	8.3542e-06	peaks1_common	221.005	310.783		Supercontig_12.7	4011457	4012240	NCU17281		7.78794	8.27976	0.49183	gray
Supercontig_12.1	7589237	7591669	1216.5	-0.49083	7.50692	9.47057e-05	peaks1_common	153.437	215.618		Supercontig_12.1	7589236	7591669	NCU00677		7.2615	7.75234	0.49083	gray
Supercontig_12.5	5927584	5930908	1662.5	-0.49061	8.27887	2.07019e-06	peaks1_common	262.026	368.156		Supercontig_12.5	5927583	5930908	NCU09844		8.03357	8.52418	0.49061	gray
Supercontig_12.6	4035310	4037095	893	-0.49058	7.71897	4.45134e-05	peaks1_common	177.747	249.736		Supercontig_12.6	4035309	4037095	NCU05023		7.47368	7.96426	0.49058	gray
Supercontig_12.3	5005328	5013687	4180	-0.48897	8.83857	2.52123e-08	peaks1_common	386.436	542.34		Supercontig_12.3	5005327	5013687	NCU08535		8.59409	9.08305	0.48897	gray
Supercontig_12.3	5195513	5199063	1775.5	-0.48825	7.67905	5.33797e-05	peaks1_common	173.036	242.724		Supercontig_12.3	5195512	5199063	NCU08772		7.43492	7.92317	0.48825	gray
Supercontig_12.5	6286497	6290398	1951	-0.48802	7.90299	2.05403e-05	peaks1_common	202.108	283.46		Supercontig_12.5	6286496	6290398	NCU07191		7.65898	8.147	0.48802	gray
Supercontig_12.2	38686	39994	654.5	-0.48736	9.62624	1.43154e-12	peaks1_common	667.47	935.712		Supercontig_12.2	38685	39994	NCU09620		9.38256	9.86992	0.48736	gray
Supercontig_12.2	4343497	4344888	696	-0.48681	8.41781	9.0389e-07	peaks1_common	288.896	404.842		Supercontig_12.2	4343496	4344888	NCU09754		8.17441	8.66122	0.48681	gray
Supercontig_12.4	4090769	4095378	2305	-0.48639	7.38181	0.000208031	peaks1_common	140.909	197.404		Supercontig_12.4	4090768	4095378	NCU08689		7.13862	7.62501	0.48639	gray
Supercontig_12.2	147607	148334	364	-0.4857	10.4262	9.60541e-20	peaks1_common	1162.74	1628.14		Supercontig_12.2	147606	148334	NCU03582		10.1833	10.669	0.4857	gray
Supercontig_12.4	3020532	3023456	1462.5	-0.4851	7.65769	6.91751e-05	peaks1_common	170.679	238.896		Supercontig_12.4	3020531	3023456	NCU06290		7.41514	7.90024	0.4851	gray
Supercontig_12.2	4367027	4367654	314	-0.48394	8.72511	1.03109e-07	peaks1_common	357.832	500.449		Supercontig_12.2	4367026	4367654	NCU09464		8.48314	8.96708	0.48394	gray
Supercontig_12.6	1355281	1356742	731	-0.48368	7.26379	0.00029433	peaks1_common	129.962	181.727		Supercontig_12.6	1355280	1356742	NCU05605		7.02195	7.50563	0.48368	gray
Supercontig_12.5	6089881	6092067	1093.5	-0.48366	8.69589	1.35744e-07	peaks1_common	350.692	490.368		Supercontig_12.5	6089880	6092067	NCU07247		8.45406	8.93772	0.48366	gray
Supercontig_12.2	4447140	4448862	861.5	-0.48361	10.849	2.14722e-25	peaks1_common	1559.84	2181.03		Supercontig_12.2	4447139	4448862	NCU09490		10.6072	11.0908	0.48361	gray
Supercontig_12.3	525381	527712	1166	-0.48297	8.23084	3.63335e-06	peaks1_common	254.118	355.16		Supercontig_12.3	525380	527712	NCU05693		7.98935	8.47233	0.48297	gray
Supercontig_12.7	975705	977157	726.5	-0.48255	7.91696	1.85307e-05	peaks1_common	204.461	285.676		Supercontig_12.7	975704	977157	NCU09568		7.67568	8.15824	0.48255	gray
Supercontig_12.3	5265629	5268474	1423	-0.48119	11.158	1.41967e-30	peaks1_common	1934.08	2699.78		Supercontig_12.3	5265628	5268474	NCU08752		10.9174	11.3986	0.48119	gray
Supercontig_12.4	2408502	2410485	992	-0.48074	7.38693	0.000213202	peaks1_common	141.687	197.718		Supercontig_12.4	2408501	2410485	NCU16790		7.14656	7.6273	0.48074	gray
Supercontig_12.1	9109342	9114311	2485	-0.47978	7.39438	0.000182668	peaks1_common	142.468	198.675		Supercontig_12.1	9109341	9114311	NCU02794		7.15449	7.63427	0.47978	gray
Supercontig_12.6	1462066	1467483	2709	-0.47937	7.37825	0.000242497	peaks1_common	140.904	196.439		Supercontig_12.6	1462065	1467483	NCU05575		7.13856	7.61794	0.47937	gray
Supercontig_12.2	19042	19908	433.5	-0.47923	10.91	5.88231e-26	peaks1_common	1629.67	2271.76		Supercontig_12.2	19041	19908	NCU09630		10.6704	11.1496	0.47923	gray
Supercontig_12.4	4099901	4102740	1420	-0.47909	7.2787	0.000359943	peaks1_common	131.522	183.323		Supercontig_12.4	4099900	4102740	NCU08686		7.03915	7.51825	0.47909	gray
Supercontig_12.3	675051	675894	422	-0.47869	7.71929	6.21696e-05	peaks1_common	178.52	248.764		Supercontig_12.3	675050	675894	NCU05732		7.47994	7.95864	0.47869	gray
Supercontig_12.7	4174511	4177028	1259	-0.47813	7.73792	5.60838e-05	peaks1_common	180.876	251.948		Supercontig_12.7	4174510	4177028	NCU05889		7.49886	7.97698	0.47813	gray
Supercontig_12.3	239408	241233	913	-0.47801	11.3498	4.09007e-34	peaks1_common	2211.43	3080.13		Supercontig_12.3	239407	241233	NCU09170		11.1108	11.5888	0.47801	gray
Supercontig_12.2	952867	955187	1160.5	-0.47632	7.47728	0.000167658	peaks1_common	151.075	210.174		Supercontig_12.2	952866	955187	NCU03365		7.23912	7.71544	0.47632	gray
Supercontig_12.7	4138290	4139280	495.5	-0.47619	8.72438	1.43606e-07	peaks1_common	358.613	498.854		Supercontig_12.7	4138289	4139280	NCU05877		8.48628	8.96247	0.47619	gray
Supercontig_12.3	12871	14169	649.5	-0.47575	11.2483	1.06964e-31	peaks1_common	2062.85	2868.69		Supercontig_12.3	12870	14169	NCU09525		11.0104	11.4862	0.47575	gray
Supercontig_12.5	6423834	6427067	1617	-0.47474	11.5503	2.57827e-38	peaks1_common	2544.14	3535.5		Supercontig_12.5	6423833	6427067	NCU07146		11.313	11.7877	0.47474	gray
Supercontig_12.6	2750934	2752112	589.5	-0.47365	8.14786	8.83024e-06	peaks1_common	240.69	334.227		Supercontig_12.6	2750933	2752112	NCU12121		7.91103	8.38468	0.47365	gray
Supercontig_12.5	405363	407304	971	-0.47298	7.5906	0.000124844	peaks1_common	163.609	227.085		Supercontig_12.5	405362	407304	NCU07756		7.35411	7.82709	0.47298	gray
Supercontig_12.2	15943	18173	1115.5	-0.47257	11.3059	1.80044e-32	peaks1_common	2149.31	2982.33		Supercontig_12.2	15942	18173	NCU09631		11.0697	11.5422	0.47257	gray
Supercontig_12.4	5848609	5850702	1047	-0.47254	11.1621	1.18073e-29	peaks1_common	1945.41	2699.36		Supercontig_12.4	5848608	5850702	NCU05179		10.9259	11.3984	0.47254	gray
Supercontig_12.5	6157636	6159880	1122.5	-0.47191	10.7801	2.42919e-23	peaks1_common	1493.17	2070.95		Supercontig_12.5	6157635	6159880	NCU07234		10.5442	11.0161	0.47191	gray
Supercontig_12.2	4442223	4443601	689.5	-0.4716	9.02397	1.12136e-08	peaks1_common	442.082	613.011		Supercontig_12.2	4442222	4443601	NCU09489		8.78817	9.25977	0.4716	gray
Supercontig_12.3	5229533	5230922	695	-0.47137	10.2668	3.80705e-17	peaks1_common	1046.32	1450.65		Supercontig_12.3	5229532	5230922	NCU08764		10.0311	10.5025	0.47137	gray
Supercontig_12.3	3142667	3146510	1922	-0.47128	7.34174	0.000305897	peaks1_common	137.768	190.994		Supercontig_12.3	3142666	3146510	NCU00241		7.1061	7.57738	0.47128	gray
Supercontig_12.5	5063063	5065541	1239.5	-0.47103	7.44437	0.000211372	peaks1_common	147.939	205.058		Supercontig_12.5	5063062	5065541	NCU04168		7.20886	7.67988	0.47103	gray
Supercontig_12.4	2092118	2095410	1646.5	-0.47061	7.54018	0.000146387	peaks1_common	158.12	219.106		Supercontig_12.4	2092117	2095410	NCU07720		7.30487	7.77548	0.47061	gray
Supercontig_12.1	112097	113288	596	-0.46987	7.95965	2.63806e-05	peaks1_common	211.529	292.965		Supercontig_12.1	112096	113288	NCU08053		7.72471	8.19459	0.46987	gray
Supercontig_12.6	4031109	4032616	754	-0.46947	8.05806	1.29529e-05	peaks1_common	226.493	313.603		Supercontig_12.6	4031108	4032616	NCU05024		7.82333	8.29279	0.46947	gray
Supercontig_12.4	4484163	4487321	1579.5	-0.46886	7.48095	0.000199645	peaks1_common	151.852	210.165		Supercontig_12.4	4484162	4487321	NCU07296		7.24652	7.71538	0.46886	gray
Supercontig_12.7	3226365	3230952	2294	-0.46878	7.44323	0.000211372	peaks1_common	147.937	204.736		Supercontig_12.7	3226364	3230952	NCU02237		7.20884	7.67762	0.46878	gray
Supercontig_12.7	940644	942441	899	-0.46837	9.92761	6.11305e-14	peaks1_common	827.964	1145.53		Supercontig_12.7	940643	942441	NCU09579		9.69342	10.1618	0.46837	gray
Supercontig_12.1	8652820	8655289	1235	-0.4679	7.4504	0.000216355	peaks1_common	148.72	205.693		Supercontig_12.1	8652819	8655289	NCU02931		7.21645	7.68435	0.4679	gray
Supercontig_12.3	4480570	4483197	1314	-0.46785	7.82964	4.10444e-05	peaks1_common	193.436	267.532		Supercontig_12.3	4480569	4483197	NCU07531		7.59571	8.06357	0.46785	gray
Supercontig_12.1	128668	129912	622.5	-0.46749	8.10641	1.16726e-05	peaks1_common	234.373	324.068		Supercontig_12.1	128667	129912	NCU08057		7.87266	8.34015	0.46749	gray
Supercontig_12.4	5913829	5914260	216	-0.46735	10.5045	1.9618e-19	peaks1_common	1235.41	1708.04		Supercontig_12.4	5913828	5914260	NCU16904		10.2708	10.7381	0.46735	gray
Supercontig_12.7	3263446	3265479	1017	-0.46644	7.33929	0.000355175	peaks1_common	137.765	190.35		Supercontig_12.7	3263445	3265479	NCU02228		7.10607	7.57251	0.46644	gray
Supercontig_12.3	401171	401661	245.5	-0.46635	9.90968	9.97757e-14	peaks1_common	818.311	1130.59		Supercontig_12.3	401170	401661	NCU05662		9.6765	10.1429	0.46635	gray
Supercontig_12.2	2580629	2583073	1222.5	-0.46611	7.36348	0.000275608	peaks1_common	140.111	193.546		Supercontig_12.2	2580628	2583073	NCU01742		7.13042	7.59653	0.46611	gray
Supercontig_12.2	4267288	4268211	462	-0.46587	8.36713	2.89385e-06	peaks1_common	280.955	388.041		Supercontig_12.2	4267287	4268211	NCU09776		8.1342	8.60006	0.46587	gray
Supercontig_12.5	2003849	2007305	1728.5	-0.46584	7.32251	0.000339512	peaks1_common	136.201	188.11		Supercontig_12.5	2003848	2007305	NCU03661		7.08959	7.55543	0.46584	gray
Supercontig_12.3	464831	467988	1579	-0.46533	7.63432	0.000120816	peaks1_common	169.091	233.452		Supercontig_12.3	464830	467988	NCU05680		7.40166	7.86698	0.46533	gray
Supercontig_12.3	5040549	5042761	1106.5	-0.46526	8.20833	7.37086e-06	peaks1_common	251.724	347.522		Supercontig_12.3	5040548	5042761	NCU08527		7.9757	8.44096	0.46526	gray
Supercontig_12.1	5911948	5914514	1283.5	-0.46521	7.37106	0.000282074	peaks1_common	140.893	194.505		Supercontig_12.1	5911947	5914514	NCU09227		7.13845	7.60366	0.46521	gray
Supercontig_12.2	3782277	3783941	832.5	-0.46432	7.37859	0.000334714	peaks1_common	141.674	195.463		Supercontig_12.2	3782276	3783941	NCU08717		7.14643	7.61075	0.46432	gray
Supercontig_12.4	3148521	3151076	1278	-0.46402	7.40214	0.000260151	peaks1_common	144.02	198.659		Supercontig_12.4	3148520	3151076	NCU04505		7.17013	7.63415	0.46402	gray
Supercontig_12.3	2496305	2500846	2271	-0.46311	7.34576	0.000363115	peaks1_common	138.544	190.985		Supercontig_12.3	2496304	2500846	NCU00068		7.11421	7.57731	0.46311	gray
Supercontig_12.1	117750	119387	819	-0.46306	8.12822	1.10766e-05	peaks1_common	238.309	328.5		Supercontig_12.1	117749	119387	NCU08055		7.89669	8.35975	0.46306	gray
Supercontig_12.3	4469940	4472815	1438	-0.46303	8.57704	7.83724e-07	peaks1_common	325.277	448.373		Supercontig_12.3	4469939	4472815	NCU07533		8.34553	8.80856	0.46303	gray
Supercontig_12.3	1826859	1829148	1145	-0.46267	7.55038	0.000177986	peaks1_common	159.681	220.054		Supercontig_12.3	1826858	1829148	NCU06187		7.31904	7.78172	0.46267	gray
Supercontig_12.1	9767398	9770901	1752	-0.46253	10.98	1.92623e-25	peaks1_common	1720.59	2370.89		Supercontig_12.1	9767397	9770901	NCU10030		10.7487	11.2112	0.46253	gray
Supercontig_12.1	3085699	3089949	2125.5	-0.46134	7.36106	0.000320168	peaks1_common	140.107	192.903		Supercontig_12.1	3085698	3089949	NCU02656		7.13039	7.59173	0.46134	gray
Supercontig_12.4	4305221	4307474	1127	-0.46091	8.1555	1.07632e-05	peaks1_common	243.039	334.521		Supercontig_12.4	4305220	4307474	NCU07342		7.92504	8.38595	0.46091	gray
Supercontig_12.4	5728643	5731913	1635.5	-0.46058	7.54931	0.000177986	peaks1_common	159.678	219.732		Supercontig_12.4	5728642	5731913	NCU05213		7.31902	7.7796	0.46058	gray
Supercontig_12.1	9588890	9591262	1186.5	-0.46051	7.72269	8.60012e-05	peaks1_common	180.073	247.785		Supercontig_12.1	9588889	9591262	NCU08608		7.49244	7.95294	0.46051	gray
Supercontig_12.2	4013287	4018727	2720.5	-0.46023	7.39236	0.000295203	peaks1_common	143.235	197.058		Supercontig_12.2	4013286	4018727	NCU08423		7.16224	7.62247	0.46023	gray
Supercontig_12.1	6835995	6839567	1786.5	-0.45982	7.35221	0.000312997	peaks1_common	139.324	191.622		Supercontig_12.1	6835994	6839567	NCU00897		7.1223	7.58212	0.45982	gray
Supercontig_12.1	9180232	9183407	1588	-0.45982	7.35221	0.000312997	peaks1_common	139.324	191.622		Supercontig_12.1	9180231	9183407	NCU02790		7.1223	7.58212	0.45982	gray
Supercontig_12.6	1391460	1393605	1073	-0.45982	7.35221	0.000312997	peaks1_common	139.324	191.622		Supercontig_12.6	1391459	1393605	NCU05593		7.1223	7.58212	0.45982	gray
Supercontig_12.6	17853	19938	1043	-0.45917	11.1602	4.30505e-28	peaks1_common	1951.78	2683.21		Supercontig_12.6	17852	19938	NCU11341		10.9306	11.3897	0.45917	gray
Supercontig_12.3	177571	180427	1428.5	-0.45802	9.32107	1.11698e-09	peaks1_common	545.736	749.653		Supercontig_12.3	177570	180427	NCU09155		9.09206	9.55008	0.45802	gray
Supercontig_12.1	7673303	7676441	1569.5	-0.45769	7.41451	0.000315383	peaks1_common	145.58	199.931		Supercontig_12.1	7673302	7676441	NCU00656		7.18566	7.64335	0.45769	gray
Supercontig_12.7	4124705	4126031	663.5	-0.45754	8.61583	7.42043e-07	peaks1_common	334.778	459.716		Supercontig_12.7	4124704	4126031	NCU11307		8.38706	8.8446	0.45754	gray
Supercontig_12.1	5074910	5078055	1573	-0.45745	7.57578	0.000164296	peaks1_common	162.811	223.558		Supercontig_12.1	5074909	5078055	NCU03253		7.34705	7.8045	0.45745	gray
Supercontig_12.7	4086848	4087633	393	-0.45677	8.66582	5.49055e-07	peaks1_common	346.674	475.798		Supercontig_12.7	4086847	4087633	NCU05860		8.43743	8.89421	0.45677	gray
Supercontig_12.3	529478	532658	1590.5	-0.45663	7.68893	0.000105471	peaks1_common	176.144	241.729		Supercontig_12.3	529477	532658	NCU05694		7.46061	7.91725	0.45663	gray
Supercontig_12.2	1984184	1987088	1452.5	-0.45585	7.34207	0.000420333	peaks1_common	138.539	190.018		Supercontig_12.2	1984183	1987088	NCU06772		7.11415	7.57	0.45585	gray
Supercontig_12.7	970324	972146	911.5	-0.45573	7.97907	3.28128e-05	peaks1_common	215.449	295.484		Supercontig_12.7	970323	972146	NCU09569		7.75121	8.20693	0.45573	gray
Supercontig_12.7	215241	218122	1441	-0.45565	7.89774	5.30706e-05	peaks1_common	203.645	279.279		Supercontig_12.7	215240	218122	NCU09444		7.66991	8.12556	0.45565	gray
Supercontig_12.6	2092818	2095485	1334	-0.45463	7.58127	0.00019435	peaks1_common	163.592	224.191		Supercontig_12.6	2092817	2095485	NCU04042		7.35396	7.80859	0.45463	gray
Supercontig_12.5	6038404	6040286	941.5	-0.45434	10.443	7.97566e-18	peaks1_common	1189.21	1629.41		Supercontig_12.5	6038403	6040286	NCU09955		10.2158	10.6701	0.45434	gray
Supercontig_12.2	4291182	4291996	407.5	-0.45414	9.12761	1.12196e-08	peaks1_common	477.892	654.695		Supercontig_12.2	4291181	4291996	NCU09768		8.90054	9.35468	0.45414	gray
Supercontig_12.6	2202207	2204515	1154.5	-0.45332	7.57368	0.000190193	peaks1_common	162.807	222.913		Supercontig_12.6	2202206	2204515	NCU04008		7.34702	7.80034	0.45332	gray
Supercontig_12.6	40033	42482	1225	-0.45307	10.1224	1.06641e-14	peaks1_common	952.671	1304.16		Supercontig_12.6	40032	42482	NCU07132		9.89584	10.3489	0.45307	gray
Supercontig_12.7	1305454	1307833	1190	-0.45257	7.80418	8.21927e-05	peaks1_common	191.062	261.463		Supercontig_12.7	1305453	1307833	NCU10021		7.5779	8.03046	0.45257	gray
Supercontig_12.2	3518379	3519893	757.5	-0.45226	7.41949	0.000315383	peaks1_common	146.358	200.245		Supercontig_12.2	3518378	3519893	NCU08478		7.19336	7.64562	0.45226	gray
Supercontig_12.3	391094	393053	980	-0.45169	10.6759	2.84594e-20	peaks1_common	1398.91	1913.2		Supercontig_12.3	391093	393053	NCU05658		10.4501	10.9018	0.45169	gray
Supercontig_12.5	5015223	5017014	896	-0.45142	7.55173	0.000206089	peaks1_common	160.454	219.403		Supercontig_12.5	5015222	5017014	NCU04153		7.32602	7.77744	0.45142	gray
Supercontig_12.1	9614053	9618727	2337.5	-0.4502	7.61993	0.000158556	peaks1_common	168.293	229.927		Supercontig_12.1	9614052	9618727	NCU08616		7.39483	7.84503	0.4502	gray
Supercontig_12.7	1203992	1206796	1402.5	-0.44995	7.41832	0.000315383	peaks1_common	146.357	199.922		Supercontig_12.7	1203991	1206796	NCU09410		7.19334	7.6433	0.44995	gray
Supercontig_12.2	56204	56983	390	-0.44962	10.2855	5.18446e-16	peaks1_common	1067.99	1458.53		Supercontig_12.2	56203	56983	NCU09612		10.0607	10.5103	0.44962	gray
Supercontig_12.1	9226315	9229345	1515.5	-0.44831	7.45556	0.000297127	peaks1_common	150.269	205.033		Supercontig_12.1	9226314	9229345	NCU02777		7.23141	7.67971	0.44831	gray
Supercontig_12.5	6344006	6346229	1112	-0.44791	8.34986	5.74684e-06	peaks1_common	279.345	381.044		Supercontig_12.5	6344005	6346229	NCU07176		8.12591	8.57381	0.44791	gray
Supercontig_12.4	4664900	4667859	1480	-0.4469	7.30459	0.000446599	peaks1_common	135.405	184.572		Supercontig_12.4	4664899	4667859	NCU06959		7.08114	7.52804	0.4469	gray
Supercontig_12.1	2936374	2939171	1399	-0.44686	7.42445	0.000322236	peaks1_common	147.137	200.559		Supercontig_12.1	2936373	2939171	NCU02619		7.20102	7.64788	0.44686	gray
Supercontig_12.4	5546783	5550425	1821.5	-0.44682	7.25371	0.000634238	peaks1_common	130.717	178.171		Supercontig_12.4	5546782	5550425	NCU05265		7.0303	7.47712	0.44682	gray
Supercontig_12.2	1011165	1015822	2329	-0.44602	7.47677	0.000316413	peaks1_common	152.616	207.905		Supercontig_12.2	1011164	1015822	NCU03350		7.25376	7.69978	0.44602	gray
Supercontig_12.3	5203616	5204342	363.5	-0.44471	9.90998	1.21589e-12	peaks1_common	824.643	1122.37		Supercontig_12.3	5203615	5204342	NCU08770		9.68763	10.1323	0.44471	gray
Supercontig_12.3	5225994	5226818	412.5	-0.44393	10.6636	1.5166e-19	peaks1_common	1390.75	1891.84		Supercontig_12.3	5225993	5226818	NCU10641		10.4416	10.8856	0.44393	gray
Supercontig_12.5	859965	860429	232.5	-0.44303	7.52617	0.000263635	peaks1_common	158.096	214.924		Supercontig_12.5	859964	860429	NCU16941		7.30465	7.74768	0.44303	gray
Supercontig_12.3	676235	678377	1071.5	-0.44127	7.82198	8.7709e-05	peaks1_common	194.193	263.675		Supercontig_12.3	676234	678377	NCU05733		7.60135	8.04262	0.44127	gray
Supercontig_12.5	1644417	1648772	2178	-0.44096	7.28482	0.000583963	peaks1_common	133.838	181.686		Supercontig_12.5	1644416	1648772	NCU04570		7.06434	7.5053	0.44096	gray
Supercontig_12.3	402181	403426	623	-0.44052	9.70449	3.38008e-11	peaks1_common	716.206	971.958		Supercontig_12.3	402180	403426	NCU05663		9.48423	9.92475	0.44052	gray
Supercontig_12.1	1730345	1733261	1458.5	-0.44012	7.48851	0.000322956	peaks1_common	154.178	209.175		Supercontig_12.1	1730344	1733261	NCU01997		7.26845	7.70857	0.44012	gray
Supercontig_12.5	2479610	2481383	887	-0.43827	7.38906	0.000465621	peaks1_common	144	195.117		Supercontig_12.5	2479609	2481383	NCU03809		7.16993	7.6082	0.43827	gray
Supercontig_12.5	2338965	2341241	1138.5	-0.43678	7.4039	0.000484198	peaks1_common	145.564	197.033		Supercontig_12.5	2338964	2341241	NCU03763		7.18551	7.62229	0.43678	gray
Supercontig_12.7	3248940	3252181	1621	-0.43604	7.57183	0.000297475	peaks1_common	163.575	221.299		Supercontig_12.7	3248939	3252181	NCU02233		7.35381	7.78985	0.43604	gray
Supercontig_12.1	5705413	5709202	1895	-0.43573	7.36407	0.0005154	peaks1_common	141.652	191.598		Supercontig_12.1	5705412	5709202	NCU08336		7.14621	7.58194	0.43573	gray
Supercontig_12.5	4758899	4761774	1438	-0.43533	7.41859	0.000429092	peaks1_common	147.128	198.949		Supercontig_12.5	4758898	4761774	NCU01435		7.20092	7.63625	0.43533	gray
Supercontig_12.3	5032578	5033465	444	-0.43475	9.49728	8.67417e-10	peaks1_common	621.627	840.238		Supercontig_12.3	5032577	5033465	NCU08530		9.27991	9.71465	0.43475	gray
Supercontig_12.1	6854907	6857976	1535	-0.43461	7.42587	0.000437631	peaks1_common	147.909	199.906		Supercontig_12.1	6854906	6857976	NCU00890		7.20856	7.64318	0.43461	gray
Supercontig_12.3	4721990	4723984	997.5	-0.43289	10.0688	2.52925e-13	peaks1_common	924.369	1247.84		Supercontig_12.3	4721989	4723984	NCU08232		9.85233	10.2852	0.43289	gray
Supercontig_12.6	939809	942755	1473.5	-0.43264	7.58387	0.000263845	peaks1_common	165.14	222.89		Supercontig_12.6	939808	942755	NCU12087		7.36755	7.80019	0.43264	gray
Supercontig_12.3	388933	390336	702	-0.43264	11.3785	5.91123e-29	peaks1_common	2291.73	3093.15		Supercontig_12.3	388932	390336	NCU05657		11.1622	11.5949	0.43264	gray
Supercontig_12.5	6173805	6175672	934	-0.43198	11.2238	2.94654e-26	peaks1_common	2059.1	2777.9		Supercontig_12.5	6173804	6175672	NCU07230		11.0078	11.4398	0.43198	gray
Supercontig_12.7	977935	980163	1114.5	-0.43196	7.82308	0.000118744	peaks1_common	194.969	263.026		Supercontig_12.7	977934	980163	NCU09567		7.6071	8.03906	0.43196	gray
Supercontig_12.2	3241959	3243540	791	-0.43109	7.55543	0.000328785	peaks1_common	162.004	218.422		Supercontig_12.2	3241958	3243540	NCU01505		7.33989	7.77098	0.43109	gray
Supercontig_12.5	1953854	1957179	1663	-0.43079	7.51279	0.000342914	peaks1_common	157.302	212.039		Supercontig_12.5	1953853	1957179	NCU03648		7.2974	7.72819	0.43079	gray
Supercontig_12.1	9765819	9767032	607	-0.4306	8.34515	1.03574e-05	peaks1_common	280.11	377.531		Supercontig_12.1	9765818	9767032	NCU10029		8.12985	8.56045	0.4306	gray
Supercontig_12.3	4699410	4702749	1670	-0.43026	8.24386	1.85153e-05	peaks1_common	261.149	351.892		Supercontig_12.3	4699409	4702749	NCU08228		8.02873	8.45899	0.43026	gray
Supercontig_12.6	1629166	1631845	1340	-0.42948	7.37674	0.000525503	peaks1_common	143.211	192.869		Supercontig_12.6	1629165	1631845	NCU05521		7.162	7.59148	0.42948	gray
Supercontig_12.3	3209936	3213245	1655	-0.42885	7.46063	0.000472385	peaks1_common	151.819	204.372		Supercontig_12.3	3209935	3213245	NCU00263		7.24621	7.67506	0.42885	gray
Supercontig_12.7	2117820	2121053	1617	-0.4288	7.74385	0.000169746	peaks1_common	184.752	248.698		Supercontig_12.7	2117819	2121053	NCU02456		7.52945	7.95825	0.4288	gray
Supercontig_12.6	3181788	3187799	3006	-0.42774	7.4968	0.00044363	peaks1_common	155.733	209.48		Supercontig_12.6	3181787	3187799	NCU05987		7.28293	7.71067	0.42774	gray
Supercontig_12.5	2436883	2439993	1555.5	-0.42607	7.35916	0.000679748	peaks1_common	141.644	190.308		Supercontig_12.5	2436882	2439993	NCU03794		7.14612	7.57219	0.42607	gray
Supercontig_12.7	3305982	3309180	1599.5	-0.42603	7.41386	0.00049358	peaks1_common	147.12	197.66		Supercontig_12.7	3305981	3309180	NCU02214		7.20084	7.62688	0.42603	gray
Supercontig_12.7	821743	824182	1220	-0.42602	7.53883	0.000316252	peaks1_common	160.432	215.544		Supercontig_12.7	821742	824182	NCU06934		7.32582	7.75184	0.42602	gray
Supercontig_12.2	3008572	3010466	947.5	-0.42593	7.2431	0.00083984	peaks1_common	130.702	175.59		Supercontig_12.2	3008571	3010466	NCU01591		7.03013	7.45606	0.42593	gray
Supercontig_12.3	4786333	4787613	640.5	-0.42583	11.0986	1.03817e-23	peaks1_common	1891.96	2541.55		Supercontig_12.3	4786332	4787613	NCU08253		10.8857	11.3115	0.42583	gray
Supercontig_12.5	5541065	5543309	1122.5	-0.42463	7.48063	0.000427364	peaks1_common	154.163	206.922		Supercontig_12.5	5541064	5543309	NCU04297		7.26831	7.69294	0.42463	gray
Supercontig_12.1	7464712	7469607	2448	-0.42268	7.39673	0.000637507	peaks1_common	145.552	195.1		Supercontig_12.1	7464711	7469607	NCU00712		7.18539	7.60807	0.42268	gray
Supercontig_12.6	2493410	2496856	1723.5	-0.42174	7.53665	0.000363354	peaks1_common	160.428	214.9		Supercontig_12.6	2493409	2496856	NCU03921		7.32578	7.74752	0.42174	gray
Supercontig_12.3	4772093	4772442	175	-0.42102	11.1146	1.72906e-23	peaks1_common	1916.34	2565.74		Supercontig_12.3	4772092	4772442	NCU08247		10.9041	11.3252	0.42102	gray
Supercontig_12.3	979196	980891	848	-0.42054	7.9346	9.36739e-05	peaks1_common	211.473	283.042		Supercontig_12.3	979195	980891	NCU07820		7.72433	8.14487	0.42054	gray
Supercontig_12.3	5205835	5207268	717	-0.42032	10.0674	1.24424e-12	peaks1_common	927.523	1241.23		Supercontig_12.3	5205834	5207268	NCU08768		9.85724	10.2776	0.42032	gray
Supercontig_12.5	2924896	2927577	1341	-0.4201	7.34011	0.000751327	peaks1_common	140.075	187.424		Supercontig_12.5	2924895	2927577	NCU01104		7.13006	7.55016	0.4201	gray
Supercontig_12.4	3661498	3664014	1258.5	-0.41989	7.37186	0.000603702	peaks1_common	143.203	191.58		Supercontig_12.4	3661497	3664014	NCU04354		7.16191	7.58181	0.41989	gray
Supercontig_12.5	2022685	2025709	1512.5	-0.41855	7.4702	0.000481218	peaks1_common	153.376	204.999		Supercontig_12.5	2022684	2025709	NCU03669		7.26092	7.67948	0.41855	gray
Supercontig_12.1	1240212	1246262	3025.5	-0.41831	7.49925	0.000517098	peaks1_common	156.508	209.152		Supercontig_12.1	1240211	1246262	NCU02112		7.29009	7.70841	0.41831	gray
Supercontig_12.7	1403080	1404671	796	-0.41805	7.52772	0.000476803	peaks1_common	159.642	213.301		Supercontig_12.7	1403079	1404671	NCU09705		7.3187	7.73675	0.41805	gray
Supercontig_12.5	6041267	6041800	267	-0.41796	10.6445	1.93248e-17	peaks1_common	1384.87	1850.23		Supercontig_12.5	6041266	6041800	NCU09956		10.4355	10.8535	0.41796	gray
Supercontig_12.4	2582299	2585267	1484.5	-0.41793	7.47723	0.000490107	peaks1_common	154.158	205.956		Supercontig_12.4	2582298	2585267	NCU08273		7.26827	7.6862	0.41793	gray
Supercontig_12.2	1701098	1702690	796.5	-0.41767	8.07624	6.43648e-05	peaks1_common	233.52	311.929		Supercontig_12.2	1701097	1702690	NCU05477		7.86741	8.28507	0.41767	gray
Supercontig_12.2	1709554	1711054	750.5	-0.41753	8.70413	2.28019e-06	peaks1_common	360.877	482.002		Supercontig_12.2	1709553	1711054	NCU05480		8.49536	8.91289	0.41753	gray
Supercontig_12.3	4207513	4209567	1027.5	-0.41712	7.31424	0.000830332	peaks1_common	137.728	183.903		Supercontig_12.3	4207512	4209567	NCU09008		7.10568	7.5228	0.41712	gray
Supercontig_12.2	3944414	3949668	2627.5	-0.41697	7.63629	0.000301722	peaks1_common	172.184	229.886		Supercontig_12.2	3944413	3949668	NCU08404		7.42781	7.84477	0.41697	gray
Supercontig_12.4	5773187	5775895	1354.5	-0.41681	7.76811	0.00020984	peaks1_common	188.668	251.866		Supercontig_12.4	5773186	5775895	NCU05201		7.55971	7.97651	0.41681	gray
Supercontig_12.4	5800855	5803581	1363.5	-0.41671	8.20166	3.73345e-05	peaks1_common	254.815	340.147		Supercontig_12.4	5800854	5803581	NCU05193		7.9933	8.41001	0.41671	gray
Supercontig_12.6	3139283	3143845	2281.5	-0.41605	7.41645	0.00066033	peaks1_common	147.895	197.331		Supercontig_12.6	3139282	3143845	NCU05996		7.20842	7.62447	0.41605	gray
Supercontig_12.3	4358026	4360279	1127	-0.41588	7.44658	0.000608528	peaks1_common	151.025	201.484		Supercontig_12.3	4358025	4360279	NCU07560		7.23864	7.65452	0.41588	gray
Supercontig_12.1	5773101	5776746	1823	-0.41584	7.6488	0.000312939	peaks1_common	173.751	231.797		Supercontig_12.1	5773100	5776746	NCU09191		7.44088	7.85672	0.41584	gray
Supercontig_12.1	831803	834075	1136.5	-0.4157	7.36184	0.000679748	peaks1_common	142.418	189.978		Supercontig_12.1	831802	834075	NCU09093		7.15399	7.56969	0.4157	gray
Supercontig_12.6	802665	808852	3094	-0.41526	7.30508	0.00081592	peaks1_common	136.945	182.621		Supercontig_12.6	802664	808852	NCU04784		7.09745	7.51271	0.41526	gray
Supercontig_12.1	9599876	9605142	2633.5	-0.41469	7.88803	0.000143766	peaks1_common	205.171	273.496		Supercontig_12.1	9599875	9605142	NCU08611		7.68068	8.09538	0.41469	gray
Supercontig_12.4	4803577	4807329	1876.5	-0.41466	7.46084	0.000629846	peaks1_common	152.589	203.399		Supercontig_12.4	4803576	4807329	NCU06990		7.25351	7.66817	0.41466	gray
Supercontig_12.3	5100348	5103561	1607	-0.41442	8.41231	1.39587e-05	peaks1_common	295.108	393.309		Supercontig_12.3	5100347	5103561	NCU08794		8.2051	8.61952	0.41442	gray
Supercontig_12.2	1607466	1611047	1791	-0.4139	7.49701	0.000517098	peaks1_common	156.504	208.508		Supercontig_12.2	1607465	1611047	NCU05429		7.29006	7.70396	0.4139	gray
Supercontig_12.6	3326807	3330420	1807	-0.41345	7.47496	0.0005609	peaks1_common	154.155	205.314		Supercontig_12.6	3326806	3330420	NCU05955		7.26823	7.68169	0.41345	gray
Supercontig_12.6	3341267	3343308	1021	-0.41287	7.83073	0.000162331	peaks1_common	197.307	262.68		Supercontig_12.6	3341266	3343308	NCU05952		7.62429	8.03717	0.41287	gray
Supercontig_12.1	8381457	8384546	1545	-0.41286	7.48197	0.000570737	peaks1_common	154.937	206.271		Supercontig_12.1	8381456	8384546	NCU03032		7.27554	7.6884	0.41286	gray
Supercontig_12.2	269736	274698	2481.5	-0.41272	7.51078	0.000526199	peaks1_common	158.07	210.422		Supercontig_12.2	269735	274698	NCU03550		7.30442	7.71714	0.41272	gray
Supercontig_12.4	3700850	3703734	1442.5	-0.41084	7.35937	0.000778025	peaks1_common	142.414	189.334		Supercontig_12.4	3700849	3703734	NCU04346		7.15395	7.56479	0.41084	gray
Supercontig_12.4	4899811	4903611	1900.5	-0.41081	7.39071	0.000832047	peaks1_common	145.543	193.49		Supercontig_12.4	4899810	4903611	NCU07011		7.18531	7.59611	0.41081	gray
Supercontig_12.3	230217	233968	1876	-0.4108	11.1518	5.56083e-23	peaks1_common	1973.27	2623.31		Supercontig_12.3	230216	233968	NCU09167		10.9464	11.3572	0.4108	gray
Supercontig_12.1	8568312	8571147	1418	-0.41021	7.39813	0.000729113	peaks1_common	146.324	194.447		Supercontig_12.1	8568311	8571147	NCU02961		7.19302	7.60324	0.41021	gray
Supercontig_12.5	1457533	1460471	1469.5	-0.40996	7.51651	0.000535351	peaks1_common	158.851	211.057		Supercontig_12.5	1457532	1460471	NCU04621		7.31153	7.72149	0.40996	gray
Supercontig_12.2	1457489	1460847	1679.5	-0.40843	7.42019	0.000766692	peaks1_common	148.671	197.322		Supercontig_12.2	1457488	1460847	NCU05377		7.21597	7.62441	0.40843	gray
Supercontig_12.4	5793912	5796404	1246.5	-0.40765	7.57117	0.000455356	peaks1_common	165.117	219.032		Supercontig_12.4	5793911	5796404	NCU05195		7.36735	7.775	0.40765	gray
Supercontig_12.6	1498011	1502200	2095	-0.40736	7.65099	0.000414867	peaks1_common	174.527	231.468		Supercontig_12.6	1498010	1502200	NCU05565		7.44731	7.85467	0.40736	gray
Supercontig_12.2	2353075	2355977	1451.5	-0.40721	7.37328	0.000804936	peaks1_common	143.975	190.928		Supercontig_12.2	2353074	2355977	NCU01809		7.16968	7.57689	0.40721	gray
Supercontig_12.3	174496	176208	856.5	-0.40699	8.97285	5.15834e-07	peaks1_common	436.354	578.569		Supercontig_12.3	174495	176208	NCU09153		8.76936	9.17634	0.40699	gray
Supercontig_12.1	2010797	2011866	535	-0.40656	8.04605	0.000101668	peaks1_common	229.567	304.296		Supercontig_12.1	2010796	2011866	NCU01923		7.84277	8.24933	0.40656	gray
Supercontig_12.5	6399381	6401135	877.5	-0.40587	7.82717	0.000211908	peaks1_common	197.298	261.398		Supercontig_12.5	6399380	6401135	NCU07157		7.62424	8.03011	0.40587	gray
Supercontig_12.6	4003365	4005357	996.5	-0.40544	7.62384	0.00038757	peaks1_common	171.388	227.002		Supercontig_12.6	4003364	4005357	NCU05027		7.42112	7.82656	0.40544	gray
Supercontig_12.1	6845163	6847790	1314	-0.40537	7.36449	0.000791455	peaks1_common	143.192	189.647		Supercontig_12.1	6845162	6847790	NCU00894		7.1618	7.56718	0.40537	gray
Supercontig_12.1	9252527	9257087	2280.5	-0.40504	7.4925	0.000580626	peaks1_common	156.496	207.22		Supercontig_12.1	9252526	9257087	NCU02770		7.28998	7.69502	0.40504	gray
Supercontig_12.1	6373582	6375054	736.5	-0.40486	8.63283	5.56489e-06	peaks1_common	344.987	456.75		Supercontig_12.1	6373581	6375054	NCU09875		8.4304	8.83526	0.40486	gray
Supercontig_12.1	9584648	9586959	1156	-0.40377	7.69387	0.000347582	peaks1_common	180.016	238.155		Supercontig_12.1	9584647	9586959	NCU08607		7.49199	7.89576	0.40377	gray
Supercontig_12.3	4907182	4909730	1274.5	-0.40355	8.04452	0.000101668	peaks1_common	229.563	303.656		Supercontig_12.3	4907181	4909730	NCU08561		7.84275	8.2463	0.40355	gray
Supercontig_12.1	1657834	1659835	1001	-0.40308	7.39451	0.000832047	peaks1_common	146.319	193.481		Supercontig_12.1	1657833	1659835	NCU02019		7.19297	7.59605	0.40308	gray
Supercontig_12.3	4740152	4742400	1124.5	-0.40308	11.2491	1.40491e-23	peaks1_common	2116.67	2798.93		Supercontig_12.3	4740151	4742400	NCU08236		11.0476	11.4507	0.40308	gray
Supercontig_12.1	6283289	6284925	818.5	-0.40292	7.60262	0.000487176	peaks1_common	169.033	223.492		Supercontig_12.1	6283288	6284925	NCU07348		7.40116	7.80408	0.40292	gray
Supercontig_12.2	2097643	2102457	2407.5	-0.4024	7.58214	0.000536751	peaks1_common	166.68	220.302		Supercontig_12.2	2097642	2102457	NCU06737		7.38094	7.78334	0.4024	gray
Supercontig_12.2	68673	69666	497	-0.40212	9.48627	1.01594e-08	peaks1_common	623.917	824.474		Supercontig_12.2	68672	69666	NCU09606		9.28521	9.68733	0.40212	gray
Supercontig_12.6	3220978	3222927	975	-0.40154	7.89785	0.000197084	peaks1_common	207.516	274.112		Supercontig_12.6	3220977	3222927	NCU05977		7.69708	8.09862	0.40154	gray
Supercontig_12.2	2774663	2780701	3019.5	-0.40086	7.42392	0.000766692	peaks1_common	149.447	197.314		Supercontig_12.2	2774662	2780701	NCU01659		7.22349	7.62435	0.40086	gray
Supercontig_12.1	4040179	4043224	1523	-0.39901	7.51095	0.00069498	peaks1_common	158.842	209.449		Supercontig_12.1	4040178	4043224	NCU10073		7.31144	7.71045	0.39901	gray
Supercontig_12.4	1985858	1989874	2008.5	-0.39885	7.38463	0.000947404	peaks1_common	145.533	191.879		Supercontig_12.4	1985857	1989874	NCU09733		7.1852	7.58405	0.39885	gray
Supercontig_12.5	840771	844153	1691.5	-0.39821	7.58001	0.000536751	peaks1_common	166.676	219.658		Supercontig_12.5	840770	844153	NCU09686		7.3809	7.77911	0.39821	gray
Supercontig_12.7	1285293	1287942	1325	-0.398	7.76455	0.000273609	peaks1_common	189.434	249.613		Supercontig_12.7	1285292	1287942	NCU10015		7.56555	7.96355	0.398	gray
Supercontig_12.5	6301441	6307132	2846	-0.39768	7.92299	0.000159962	peaks1_common	211.447	278.557		Supercontig_12.5	6301440	6307132	NCU07187		7.72415	8.12183	0.39768	gray
Supercontig_12.2	4272699	4275266	1284	-0.39733	8.16475	7.50806e-05	peaks1_common	250.052	329.336		Supercontig_12.2	4272698	4275266	NCU09773		7.96609	8.36342	0.39733	gray
Supercontig_12.6	3549	4482	467	-0.39687	10.7278	8.01325e-17	peaks1_common	1477.94	1945.93		Supercontig_12.6	3548	4482	NCU07142		10.5294	10.9262	0.39687	gray
Supercontig_12.3	387021	387656	318	-0.39645	11.0344	4.01753e-20	peaks1_common	1828.15	2406.32		Supercontig_12.3	387020	387656	NCU05656		10.8362	11.2326	0.39645	gray
Supercontig_12.1	3021493	3024070	1289	-0.39635	7.63237	0.000457013	peaks1_common	172.948	227.63		Supercontig_12.1	3021492	3024070	NCU02639		7.4342	7.83054	0.39635	gray
Supercontig_12.1	8701416	8703127	856	-0.39599	7.27873	0.00117514	peaks1_common	135.367	178.122		Supercontig_12.1	8701415	8703127	NCU02916		7.08074	7.47672	0.39599	gray
Supercontig_12.1	2530285	2531589	652.5	-0.39587	7.63865	0.000464531	peaks1_common	173.731	228.585		Supercontig_12.1	2530284	2531589	NCU02499		7.44071	7.83658	0.39587	gray
Supercontig_12.1	8939206	8943113	1954	-0.39561	7.35953	0.0010283	peaks1_common	143.184	188.358		Supercontig_12.1	8939205	8943113	NCU02842		7.16172	7.55734	0.39561	gray
Supercontig_12.6	1227130	1230348	1609.5	-0.39548	7.55813	0.000581831	peaks1_common	164.323	216.147		Supercontig_12.6	1227129	1230348	NCU05642		7.36039	7.75587	0.39548	gray
Supercontig_12.1	5443564	5446299	1368	-0.39515	7.43605	0.000791985	peaks1_common	151.007	198.587		Supercontig_12.1	5443563	5446299	NCU09131		7.23847	7.63362	0.39515	gray
Supercontig_12.5	6133756	6138665	2455	-0.39514	7.95356	0.000174117	peaks1_common	216.165	284.272		Supercontig_12.5	6133755	6138665	NCU07238		7.75599	8.15113	0.39514	gray
Supercontig_12.2	1754835	1759483	2324.5	-0.39481	7.537	0.000640974	peaks1_common	161.971	212.955		Supercontig_12.2	1754834	1759483	NCU06851		7.3396	7.7344	0.39481	gray
Supercontig_12.1	2212166	2214400	1117.5	-0.39474	7.33526	0.00113357	peaks1_common	140.838	185.16		Supercontig_12.1	2212165	2214400	NCU01865		7.13789	7.53263	0.39474	gray
Supercontig_12.5	2759245	2763103	1929.5	-0.39463	7.44325	0.000804698	peaks1_common	151.79	199.544		Supercontig_12.5	2759244	2763103	NCU01047		7.24594	7.64056	0.39463	gray
Supercontig_12.5	5067463	5069571	1054.5	-0.39445	7.65734	0.00047969	peaks1_common	176.083	231.451		Supercontig_12.5	5067462	5069571	NCU04169		7.46012	7.85456	0.39445	gray
Supercontig_12.6	3957084	3961803	2360	-0.39265	7.5359	0.000640974	peaks1_common	161.969	212.633		Supercontig_12.6	3957083	3961803	NCU05041		7.33957	7.73223	0.39265	gray
Supercontig_12.2	107020	108114	547.5	-0.39254	10.7982	3.25438e-17	peaks1_common	1554.19	2040.19		Supercontig_12.2	107019	108114	NCU09593		10.602	10.9945	0.39254	gray
Supercontig_12.1	8529635	8533920	2143	-0.39184	7.63661	0.000527929	peaks1_common	173.728	227.943		Supercontig_12.1	8529634	8533920	NCU02976		7.44069	7.83253	0.39184	gray
Supercontig_12.1	2909606	2913995	2195	-0.39173	7.34172	0.00115082	peaks1_common	141.617	185.797		Supercontig_12.1	2909605	2913995	NCU02612		7.14586	7.53759	0.39173	gray
Supercontig_12.4	4248244	4250307	1032	-0.39074	8.15685	8.3916e-05	peaks1_common	249.255	326.79		Supercontig_12.4	4248243	4250307	NCU08643		7.96148	8.35222	0.39074	gray
Supercontig_12.6	3089204	3091311	1054	-0.39048	7.8365	0.000288464	peaks1_common	199.64	261.695		Supercontig_12.6	3089203	3091311	NCU06012		7.64126	8.03174	0.39048	gray
Supercontig_12.3	1213529	1215473	972.5	-0.38972	7.51332	0.000801399	peaks1_common	159.616	209.119		Supercontig_12.3	1213528	1215473	NCU16624		7.31846	7.70818	0.38972	gray
Supercontig_12.7	6964	8885	961	-0.38924	10.9082	4.20594e-18	peaks1_common	1679.25	2199.32		Supercontig_12.7	6963	8885	NCU09304		10.7136	11.1028	0.38924	gray
Supercontig_12.1	6143816	6147203	1694	-0.38874	7.30799	0.00123075	peaks1_common	138.488	181.316		Supercontig_12.1	6143815	6147203	NCU07381		7.11362	7.50236	0.38874	gray
Supercontig_12.2	1760159	1762931	1386.5	-0.38825	7.68599	0.000449915	peaks1_common	180.001	235.587		Supercontig_12.2	1760158	1762931	NCU06850		7.49187	7.88012	0.38825	gray
Supercontig_12.2	2629952	2633540	1794.5	-0.38811	7.23249	0.00143031	peaks1_common	131.456	172.033		Supercontig_12.2	2629951	2633540	NCU01724		7.03843	7.42654	0.38811	gray
Supercontig_12.2	84233	86147	957.5	-0.3878	7.63455	0.000598844	peaks1_common	173.724	227.299		Supercontig_12.2	84232	86147	NCU09600		7.44065	7.82845	0.3878	gray
Supercontig_12.3	2033644	2038937	2647	-0.38769	7.43972	0.00091443	peaks1_common	151.784	198.578		Supercontig_12.3	2033643	2038937	NCU06247		7.24587	7.63356	0.38769	gray
Supercontig_12.3	460979	462154	588	-0.38758	10.1181	1.77221e-11	peaks1_common	971.662	1271.12		Supercontig_12.3	460978	462154	NCU05679		9.92431	10.3119	0.38758	gray
Supercontig_12.3	975361	976669	654.5	-0.38751	7.96536	0.000207468	peaks1_common	218.518	285.85		Supercontig_12.3	975360	976669	NCU07818		7.77161	8.15911	0.38751	gray
Supercontig_12.3	5237086	5238986	950.5	-0.38738	8.37125	4.10425e-05	peaks1_common	289.528	378.707		Supercontig_12.3	5237085	5238986	NCU08762		8.17756	8.56494	0.38738	gray
Supercontig_12.6	1943366	1945816	1225.5	-0.38725	7.33145	0.00128656	peaks1_common	140.831	184.193		Supercontig_12.6	1943365	1945816	NCU04084		7.13783	7.52507	0.38725	gray
Supercontig_12.3	274859	275686	414	-0.38664	11.1009	4.73656e-20	peaks1_common	1920.86	2511.23		Supercontig_12.3	274858	275686	NCU09181		10.9075	11.2942	0.38664	gray
Supercontig_12.3	1633443	1635306	932	-0.38658	7.2572	0.00149495	peaks1_common	133.798	174.913		Supercontig_12.3	1633442	1635306	NCU06497		7.06391	7.45049	0.38658	gray
Supercontig_12.3	3248301	3251897	1798.5	-0.38627	7.46115	0.000942196	peaks1_common	154.131	201.451		Supercontig_12.3	3248300	3251897	NCU00272		7.26802	7.65429	0.38627	gray
Supercontig_12.3	296327	298561	1117.5	-0.3858	11.2247	1.50575e-21	peaks1_common	2093.64	2735.52		Supercontig_12.3	296326	298561	NCU09189		11.0318	11.4176	0.3858	gray
Supercontig_12.5	5488296	5489330	517.5	-0.38486	7.51792	0.000801399	peaks1_common	160.396	209.434		Supercontig_12.5	5488295	5489330	NCU04282		7.32549	7.71035	0.38486	gray
Supercontig_12.1	8756792	8761672	2440.5	-0.38483	7.36973	0.00120272	peaks1_common	144.74	188.987		Supercontig_12.1	8756791	8761672	NCU02898		7.17731	7.56215	0.38483	gray
Supercontig_12.5	1745501	1751550	3025	-0.38399	7.49618	0.000881823	peaks1_common	158.044	206.239		Supercontig_12.5	1745500	1751550	NCU03591		7.30419	7.68817	0.38399	gray
Supercontig_12.1	8692542	8699834	3646.5	-0.38394	7.25586	0.00149495	peaks1_common	133.796	174.59		Supercontig_12.1	8692541	8699834	NCU02918		7.06389	7.44783	0.38394	gray
Supercontig_12.5	4562796	4566951	2078	-0.38353	7.46707	0.000956128	peaks1_common	154.912	202.087		Supercontig_12.5	4562795	4566951	NCU09552		7.27531	7.65883	0.38353	gray
Supercontig_12.5	5612475	5614848	1187	-0.38353	7.46707	0.000956128	peaks1_common	154.912	202.087		Supercontig_12.5	5612474	5614848	NCU04322		7.27531	7.65883	0.38353	gray
Supercontig_12.1	8947024	8949522	1249.5	-0.38308	7.47412	0.000970092	peaks1_common	155.695	203.046		Supercontig_12.1	8947023	8949522	NCU02839		7.28258	7.66566	0.38308	gray
Supercontig_12.7	3956776	3960534	1879.5	-0.38298	7.27212	0.00133658	peaks1_common	135.357	176.51		Supercontig_12.7	3956775	3960534	NCU05828		7.08063	7.46361	0.38298	gray
Supercontig_12.2	1822777	1826393	1808.5	-0.38296	7.39964	0.00110852	peaks1_common	147.867	192.821		Supercontig_12.2	1822776	1826393	NCU06836		7.20816	7.59112	0.38296	gray
Supercontig_12.3	4436088	4437815	864	-0.38265	7.55161	0.000750458	peaks1_common	164.311	214.218		Supercontig_12.3	4436087	4437815	NCU07541		7.36028	7.74294	0.38265	gray
Supercontig_12.7	1206484	1209868	1692.5	-0.38251	7.40702	0.00112464	peaks1_common	148.649	193.78		Supercontig_12.7	1206483	1209868	NCU09408		7.21576	7.59827	0.38251	gray
Supercontig_12.4	5834812	5836862	1025.5	-0.38219	9.1843	4.6826e-07	peaks1_common	509.594	664.164		Supercontig_12.4	5834811	5836862	NCU16901		8.9932	9.37539	0.38219	gray
Supercontig_12.5	3360193	3364521	2164.5	-0.38202	7.2882	0.00155959	peaks1_common	136.92	178.429		Supercontig_12.5	3360192	3364521	NCU01247		7.09719	7.47921	0.38202	gray
Supercontig_12.2	4025037	4026952	958	-0.38175	7.49505	0.000881823	peaks1_common	158.043	205.918		Supercontig_12.2	4025036	4026952	NCU08425		7.30417	7.68593	0.38175	gray
Supercontig_12.1	9560705	9567181	3238.5	-0.38172	7.63146	0.000677993	peaks1_common	173.718	226.336		Supercontig_12.1	9560704	9567181	NCU08603		7.4406	7.82232	0.38172	gray
Supercontig_12.3	4669535	4672810	1638	-0.38143	8.3038	6.21703e-05	peaks1_common	276.874	360.665		Supercontig_12.3	4669534	4672810	NCU08218		8.11308	8.49452	0.38143	gray
Supercontig_12.3	4811606	4812655	525	-0.38116	11.2764	9.40268e-22	peaks1_common	2173.52	2830.77		Supercontig_12.3	4811605	4812655	NCU08261		11.0858	11.467	0.38116	gray
Supercontig_12.3	981619	983387	884.5	-0.38108	7.81458	0.000354033	peaks1_common	197.272	256.91		Supercontig_12.3	981618	983387	NCU07821		7.62404	8.00512	0.38108	gray
Supercontig_12.7	1793032	1795619	1294	-0.38085	7.35203	0.00132384	peaks1_common	143.172	186.425		Supercontig_12.7	1793031	1795619	NCU06101		7.1616	7.54246	0.38085	gray
Supercontig_12.5	6231160	6232580	710.5	-0.38045	10.9799	3.604e-18	peaks1_common	1770.22	2304.38		Supercontig_12.5	6231159	6232580	NCU07211		10.7897	11.1702	0.38045	gray
Supercontig_12.1	9221754	9224912	1579.5	-0.38038	7.47998	0.000855964	peaks1_common	156.475	203.681		Supercontig_12.1	9221753	9224912	NCU02778		7.28979	7.67017	0.38038	gray
Supercontig_12.3	3169590	3172219	1315	-0.37983	7.45053	0.000928295	peaks1_common	153.343	199.528		Supercontig_12.3	3169589	3172219	NCU00249		7.26062	7.64045	0.37983	gray
Supercontig_12.5	3162660	3165260	1300.5	-0.37983	7.45053	0.000928295	peaks1_common	153.343	199.528		Supercontig_12.5	3162659	3165260	NCU01184		7.26062	7.64045	0.37983	gray
Supercontig_12.2	254616	255456	420.5	-0.37968	7.63043	0.000677993	peaks1_common	173.716	226.014		Supercontig_12.2	254615	255456	NCU03553		7.44059	7.82027	0.37968	gray
Supercontig_12.1	5895528	5897810	1141.5	-0.3796	7.52927	0.000825493	peaks1_common	161.957	210.703		Supercontig_12.1	5895527	5897810	NCU09221		7.33947	7.71907	0.3796	gray
Supercontig_12.1	2206690	2207912	611.5	-0.37926	7.33538	0.00147683	peaks1_common	141.607	184.185		Supercontig_12.1	2206689	2207912	NCU01867		7.14575	7.52501	0.37926	gray
Supercontig_12.1	4572199	4576097	1949.5	-0.37909	7.50083	0.000894804	peaks1_common	158.824	206.554		Supercontig_12.1	4572198	4576097	NCU03104		7.31129	7.69037	0.37909	gray
Supercontig_12.7	879701	881640	970	-0.37889	7.89725	0.000292686	peaks1_common	209.065	271.855		Supercontig_12.7	879700	881640	NCU06951		7.7078	8.08669	0.37889	gray
Supercontig_12.4	5715089	5717335	1123.5	-0.37838	7.43499	0.00117315	peaks1_common	151.776	197.291		Supercontig_12.4	5715088	5717335	NCU11146		7.2458	7.62418	0.37838	gray
Supercontig_12.7	2790800	2795451	2326	-0.37783	7.52137	0.000920862	peaks1_common	161.172	209.424		Supercontig_12.7	2790799	2795451	NCU02351		7.33245	7.71028	0.37783	gray
Supercontig_12.7	988465	989926	731	-0.3773	7.9445	0.000254089	peaks1_common	216.144	280.752		Supercontig_12.7	988464	989926	NCU12035		7.75585	8.13315	0.3773	gray
Supercontig_12.5	1948763	1953026	2132	-0.37729	7.27753	0.00153805	peaks1_common	136.134	176.825		Supercontig_12.5	1948762	1953026	NCU03647		7.08888	7.46618	0.37729	gray
Supercontig_12.4	5899198	5900384	593.5	-0.37715	7.97046	0.000238589	peaks1_common	220.08	285.834		Supercontig_12.4	5899197	5900384	NCU16903		7.78189	8.15903	0.37715	gray
Supercontig_12.4	5665455	5667073	809.5	-0.37711	7.5693	0.00088631	peaks1_common	166.658	216.445		Supercontig_12.4	5665454	5667073	NCU05235		7.38075	7.75785	0.37711	gray
Supercontig_12.3	4353346	4356777	1716	-0.37646	7.42656	0.00115696	peaks1_common	150.992	196.011		Supercontig_12.3	4353345	4356777	NCU07561		7.23833	7.61479	0.37646	gray
Supercontig_12.7	2992743	2995144	1201	-0.37646	7.42656	0.00115696	peaks1_common	150.992	196.011		Supercontig_12.7	2992742	2995144	NCU02305		7.23833	7.61479	0.37646	gray
Supercontig_12.2	2433075	2439647	3286.5	-0.37644	7.50658	0.00102623	peaks1_common	159.605	207.188		Supercontig_12.2	2433074	2439647	NCU01789		7.31836	7.6948	0.37644	gray
Supercontig_12.5	5238007	5241064	1529	-0.37632	7.34183	0.0013052	peaks1_common	142.387	184.822		Supercontig_12.5	5238006	5241064	NCU04216		7.15367	7.52999	0.37632	gray
Supercontig_12.7	233814	238132	2159.5	-0.3762	7.38855	0.00123743	peaks1_common	147.079	190.897		Supercontig_12.7	233813	238132	NCU09450		7.20045	7.57665	0.3762	gray
Supercontig_12.7	202488	206606	2059.5	-0.37615	8.0745	0.000188442	peaks1_common	236.619	307.102		Supercontig_12.7	202487	206606	NCU09441		7.88642	8.26257	0.37615	gray
Supercontig_12.1	5841968	5844820	1426.5	-0.37577	7.39599	0.0012548	peaks1_common	147.862	191.855		Supercontig_12.1	5841967	5844820	NCU09208		7.2081	7.58388	0.37577	gray
Supercontig_12.7	8952	11128	1088.5	-0.37553	9.44474	7.9496e-08	peaks1_common	611.825	793.73		Supercontig_12.7	8951	11128	NCU09303		9.25697	9.6325	0.37553	gray
Supercontig_12.2	1564370	1567748	1689.5	-0.37546	7.35716	0.0013425	peaks1_common	143.951	186.74		Supercontig_12.2	1564369	1567748	NCU05417		7.16943	7.54489	0.37546	gray
Supercontig_12.1	5593665	5596857	1596.5	-0.37503	7.49163	0.000998107	peaks1_common	158.037	204.952		Supercontig_12.1	5593664	5596857	NCU08371		7.30411	7.67915	0.37503	gray
Supercontig_12.6	1963829	1967645	1908.5	-0.37493	7.41075	0.00112464	peaks1_common	149.426	193.772		Supercontig_12.6	1963828	1967645	NCU04077		7.22328	7.59821	0.37493	gray
Supercontig_12.1	1014237	1016969	1366.5	-0.37467	7.32506	0.00145678	peaks1_common	140.822	182.581		Supercontig_12.1	1014236	1016969	NCU02170		7.13773	7.51239	0.37467	gray
Supercontig_12.5	2587218	2593166	2974.5	-0.37452	7.41807	0.00114079	peaks1_common	150.207	194.73		Supercontig_12.5	2587217	2593166	NCU03844		7.23081	7.60533	0.37452	gray
Supercontig_12.5	5749636	5751468	916.5	-0.37398	7.46949	0.0010971	peaks1_common	155.686	201.758		Supercontig_12.5	5749635	5751468	NCU08933		7.2825	7.65648	0.37398	gray
Supercontig_12.1	1474024	1480845	3411	-0.37378	7.38732	0.00123743	peaks1_common	147.077	190.574		Supercontig_12.1	1474023	1480845	NCU02068		7.20043	7.57421	0.37378	gray
Supercontig_12.4	6446	8374	964.5	-0.37333	11.5237	2.05675e-24	peaks1_common	2586.89	3350.9		Supercontig_12.4	6445	8374	NCU09636		11.337	11.7103	0.37333	gray
Supercontig_12.6	647962	650503	1271	-0.37329	7.43983	0.00118936	peaks1_common	152.555	197.605		Supercontig_12.6	647961	650503	NCU10519		7.25318	7.62647	0.37329	gray
Supercontig_12.1	8823648	8824866	609.5	-0.37304	7.60077	0.000829657	peaks1_common	170.574	220.906		Supercontig_12.1	8823647	8824866	NCU02880		7.41425	7.78729	0.37304	gray
Supercontig_12.7	1309956	1311228	636.5	-0.37247	7.88855	0.000326178	peaks1_common	208.271	269.62		Supercontig_12.7	1309955	1311228	NCU10057		7.70231	8.07478	0.37247	gray
Supercontig_12.2	4275466	4278203	1369	-0.37244	8.28267	9.68983e-05	peaks1_common	273.7	354.315		Supercontig_12.2	4275465	4278203	NCU09772		8.09645	8.46889	0.37244	gray
Supercontig_12.4	5816743	5819374	1316	-0.37214	9.05434	1.66344e-06	peaks1_common	467.321	604.84		Supercontig_12.4	5816742	5819374	NCU05188		8.86827	9.24041	0.37214	gray
Supercontig_12.1	1139488	1145597	3055	-0.37209	7.58025	0.000795517	peaks1_common	168.22	217.715		Supercontig_12.1	1139487	1145597	NCU02131		7.39421	7.7663	0.37209	gray
Supercontig_12.6	2672208	2674597	1195	-0.372	7.97299	0.000273675	peaks1_common	220.86	285.825		Supercontig_12.6	2672207	2674597	NCU03868		7.78699	8.15899	0.372	gray
Supercontig_12.2	3880844	3883948	1552.5	-0.37193	7.72108	0.000549795	peaks1_common	185.479	240.026		Supercontig_12.2	3880843	3883948	NCU08749		7.53511	7.90705	0.37193	gray
Supercontig_12.2	309496	310744	624.5	-0.3719	7.61995	0.000755509	peaks1_common	172.925	223.774		Supercontig_12.2	309495	310744	NCU03542		7.434	7.8059	0.3719	gray
Supercontig_12.4	55579	56712	567	-0.37183	10.7183	5.12588e-15	peaks1_common	1480.99	1916.39		Supercontig_12.4	55578	56712	NCU09645		10.5323	10.9042	0.37183	gray
Supercontig_12.5	6042572	6045717	1573	-0.37183	10.8804	1.69039e-16	peaks1_common	1657.15	2144.34		Supercontig_12.5	6042571	6045717	NCU09957		10.6945	11.0663	0.37183	gray
Supercontig_12.3	597468	598705	619	-0.37059	8.62863	2.06305e-05	peaks1_common	348.094	450.045		Supercontig_12.3	597467	598705	NCU05711		8.44334	8.81393	0.37059	gray
Supercontig_12.6	72714	76049	1668	-0.37051	8.32679	7.59291e-05	peaks1_common	282.388	365.074		Supercontig_12.6	72713	76049	NCU07121		8.14154	8.51204	0.37051	gray
Supercontig_12.7	525789	529607	1909.5	-0.37018	7.45298	0.00120558	peaks1_common	154.118	199.199		Supercontig_12.7	525788	529607	NCU11000		7.26789	7.63807	0.37018	gray
Supercontig_12.5	65303	69088	1893	-0.36976	7.50318	0.00115765	peaks1_common	159.598	206.223		Supercontig_12.5	65302	69088	NCU08869		7.3183	7.68806	0.36976	gray
Supercontig_12.7	193052	197941	2445	-0.36944	7.76195	0.000530274	peaks1_common	190.974	246.71		Supercontig_12.7	193051	197941	NCU09438		7.57723	7.94667	0.36944	gray
Supercontig_12.2	2958192	2961293	1551	-0.36919	7.22288	0.00183893	peaks1_common	131.442	169.774		Supercontig_12.2	2958191	2961293	NCU01612		7.03829	7.40748	0.36919	gray
Supercontig_12.6	2171237	2174136	1450	-0.36824	7.29757	0.00158112	peaks1_common	138.472	178.736		Supercontig_12.6	2171236	2174136	NCU04018		7.11345	7.48169	0.36824	gray
Supercontig_12.6	571234	574742	1754.5	-0.36789	7.53722	0.00108274	peaks1_common	163.515	211.01		Supercontig_12.6	571233	574742	NCU04729		7.35328	7.72117	0.36789	gray
Supercontig_12.2	3046251	3049342	1546	-0.36786	7.4518	0.00120558	peaks1_common	154.116	198.877		Supercontig_12.2	3046250	3049342	NCU01572		7.26787	7.63573	0.36786	gray
Supercontig_12.4	5949691	5951318	814	-0.3668	11.2407	5.91064e-20	peaks1_common	2130.93	2747.82		Supercontig_12.4	5949690	5951318	NCU10037		11.0573	11.4241	0.3668	gray
Supercontig_12.5	5863305	5865729	1212.5	-0.36679	7.51577	0.00104032	peaks1_common	161.163	207.816		Supercontig_12.5	5863304	5865729	NCU08967		7.33237	7.69917	0.36679	gray
Supercontig_12.3	4807036	4808227	596	-0.36659	10.9529	8.15692e-17	peaks1_common	1745.69	2250.73		Supercontig_12.3	4807035	4808227	NCU08260		10.7696	11.1362	0.36659	gray
Supercontig_12.3	5261768	5264452	1342.5	-0.36649	11.4054	5.32388e-22	peaks1_common	2388.92	3079.83		Supercontig_12.3	5261767	5264452	NCU08753		11.2221	11.5886	0.36649	gray
Supercontig_12.5	6225076	6227238	1081.5	-0.36642	11.0503	8.72928e-18	peaks1_common	1867.73	2407.78		Supercontig_12.5	6225075	6227238	NCU07214		10.8671	11.2335	0.36642	gray
Supercontig_12.1	3185465	3189144	1840	-0.36601	7.48705	0.00112734	peaks1_common	158.029	203.665		Supercontig_12.1	3185464	3189144	NCU02683		7.30404	7.67005	0.36601	gray
Supercontig_12.6	136247	138233	993.5	-0.36588	8.30001	0.000102693	peaks1_common	277.64	357.785		Supercontig_12.6	136246	138233	NCU07113		8.11707	8.48295	0.36588	gray
Supercontig_12.4	1672336	1674848	1256.5	-0.36572	7.61681	0.000852564	peaks1_common	172.919	222.81		Supercontig_12.4	1672335	1674848	NCU06573		7.43395	7.79967	0.36572	gray
Supercontig_12.7	1156392	1158959	1284	-0.36554	7.85753	0.000443167	peaks1_common	204.33	263.252		Supercontig_12.7	1156391	1158959	NCU09427		7.67476	8.0403	0.36554	gray
Supercontig_12.6	720704	722572	934.5	-0.36446	7.47189	0.00123806	peaks1_common	156.461	201.428		Supercontig_12.6	720703	722572	NCU04764		7.28966	7.65412	0.36446	gray
Supercontig_12.5	5553928	5555711	892	-0.36434	7.60296	0.000829657	peaks1_common	171.349	220.576		Supercontig_12.5	5553927	5555711	NCU04301		7.42079	7.78513	0.36434	gray
Supercontig_12.4	4186015	4188252	1119	-0.36395	7.56938	0.000999702	peaks1_common	167.429	215.472		Supercontig_12.4	4186014	4188252	NCU08662		7.38741	7.75135	0.36395	gray
Supercontig_12.7	1158981	1160438	729	-0.36385	8.0489	0.000255332	peaks1_common	233.451	300.417		Supercontig_12.7	1158980	1160438	NCU09426		7.86697	8.23082	0.36385	gray
Supercontig_12.1	3057737	3059751	1007.5	-0.36364	7.69224	0.000672046	peaks1_common	182.332	234.6		Supercontig_12.1	3057736	3059751	NCU02648		7.51042	7.87406	0.36364	gray
Supercontig_12.3	237024	238377	677	-0.36339	11.2378	1.31414e-19	peaks1_common	2129.26	2739.17		Supercontig_12.3	237023	238377	NCU09169		11.0561	11.4195	0.36339	gray
Supercontig_12.2	2075817	2078478	1331	-0.36335	7.39729	0.00161693	peaks1_common	148.633	191.203		Supercontig_12.2	2075816	2078478	NCU06745		7.21562	7.57896	0.36335	gray
Supercontig_12.4	4214035	4216869	1417.5	-0.36335	7.39729	0.00161693	peaks1_common	148.633	191.203		Supercontig_12.4	4214034	4216869	NCU08652		7.21562	7.57896	0.36335	gray
Supercontig_12.7	3992761	3995298	1269	-0.36287	7.45657	0.00137669	peaks1_common	154.894	199.19		Supercontig_12.7	3992760	3995298	NCU05836		7.27514	7.63801	0.36287	gray
Supercontig_12.3	4767460	4769023	782	-0.36188	10.9383	2.37329e-16	peaks1_common	1731.01	2224.52		Supercontig_12.3	4767459	4769023	NCU08245		10.7574	11.1193	0.36188	gray
Supercontig_12.5	1880364	1884011	1824	-0.36173	7.20185	0.0023122	peaks1_common	129.875	166.886		Supercontig_12.5	1880363	1884011	NCU03622		7.02099	7.38271	0.36173	gray
Supercontig_12.4	1435733	1438366	1317	-0.36154	7.26953	0.00196254	peaks1_common	136.122	174.89		Supercontig_12.4	1435732	1438366	NCU07893		7.08876	7.4503	0.36154	gray
Supercontig_12.6	1642524	1645372	1424.5	-0.36154	7.26953	0.00196254	peaks1_common	136.122	174.89		Supercontig_12.6	1642523	1645372	NCU05518		7.08876	7.4503	0.36154	gray
Supercontig_12.2	40799	41401	301.5	-0.36138	9.96295	1.5473e-09	peaks1_common	880.549	1131.2		Supercontig_12.2	40798	41401	NCU09619		9.78226	10.1436	0.36138	gray
Supercontig_12.7	541772	544953	1591	-0.36128	7.38863	0.00159695	peaks1_common	147.85	189.923		Supercontig_12.7	541771	544953	NCU06862		7.20799	7.56927	0.36128	gray
Supercontig_12.3	3278406	3281827	1711	-0.36091	7.34191	0.00168854	peaks1_common	143.157	183.847		Supercontig_12.3	3278405	3281827	NCU00277		7.16146	7.52236	0.36091	gray
Supercontig_12.6	1577125	1579686	1281	-0.3608	7.49863	0.00130315	peaks1_common	159.59	204.936		Supercontig_12.6	1577124	1579686	NCU05540		7.31823	7.67903	0.3608	gray
Supercontig_12.1	8066094	8067082	494.5	-0.36025	7.41082	0.00145454	peaks1_common	150.195	192.798		Supercontig_12.1	8066093	8067082	NCU10916		7.23069	7.59095	0.36025	gray
Supercontig_12.4	4210231	4211223	496.5	-0.36013	7.51239	0.00117283	peaks1_common	161.157	206.852		Supercontig_12.4	4210230	4211223	NCU08654		7.33233	7.69246	0.36013	gray
Supercontig_12.2	2675100	2677131	1016	-0.3598	7.51921	0.00118803	peaks1_common	161.939	207.808		Supercontig_12.2	2675099	2677131	NCU01703		7.33931	7.69911	0.3598	gray
Supercontig_12.1	4796741	4800876	2068	-0.35977	7.30947	0.00183158	peaks1_common	140.029	179.689		Supercontig_12.1	4796740	4800876	NCU03174		7.12959	7.48935	0.35977	gray
Supercontig_12.4	3901218	3904704	1743.5	-0.35885	7.38739	0.00159695	peaks1_common	147.847	189.6		Supercontig_12.4	3901217	3904704	NCU08009		7.20796	7.56682	0.35885	gray
Supercontig_12.7	2897406	2899982	1288.5	-0.35839	7.59332	0.00105271	peaks1_common	170.559	218.655		Supercontig_12.7	2897405	2899982	NCU02328		7.41412	7.77251	0.35839	gray
Supercontig_12.5	5872682	5873113	216	-0.35816	7.72018	0.000709413	peaks1_common	186.25	238.734		Supercontig_12.5	5872681	5873113	NCU08971		7.5411	7.89926	0.35816	gray
Supercontig_12.7	2131070	2132266	598.5	-0.35806	7.68318	0.000852144	peaks1_common	181.541	232.681		Supercontig_12.7	2131069	2132266	NCU02451		7.50415	7.86221	0.35806	gray
Supercontig_12.1	5815007	5820220	2607	-0.35793	7.64521	0.000898695	peaks1_common	176.833	226.627		Supercontig_12.1	5815006	5820220	NCU09202		7.46625	7.82417	0.35793	gray
Supercontig_12.1	9759597	9762612	1508	-0.35776	11.1607	2.76941e-18	peaks1_common	2022.4	2591.57		Supercontig_12.1	9759596	9762612	NCU10027		10.9818	11.3396	0.35776	gray
Supercontig_12.1	6488909	6491198	1145	-0.35755	7.73199	0.000728266	peaks1_common	187.821	240.645		Supercontig_12.1	6488908	6491198	NCU00985		7.55322	7.91076	0.35755	gray
Supercontig_12.5	6420073	6422165	1046.5	-0.35726	11.2085	1.08603e-18	peaks1_common	2090.86	2678.37		Supercontig_12.5	6420072	6422165	NCU07148		11.0299	11.3871	0.35726	gray
Supercontig_12.3	4809123	4810856	867	-0.35711	11.1731	2.56355e-18	peaks1_common	2040.31	2613.35		Supercontig_12.3	4809122	4810856	NCU16704		10.9946	11.3517	0.35711	gray
Supercontig_12.7	943779	944454	338	-0.35704	10.81	7.17615e-15	peaks1_common	1586.36	2031.8		Supercontig_12.7	943778	944454	NCU09578		10.6315	10.9885	0.35704	gray
Supercontig_12.5	5625151	5630337	2593.5	-0.35694	7.53166	0.00136831	peaks1_common	163.505	209.402		Supercontig_12.5	5625150	5630337	NCU04326		7.35319	7.71013	0.35694	gray
Supercontig_12.5	1995721	1999565	1922.5	-0.35694	7.48244	0.00142898	peaks1_common	158.021	202.378		Supercontig_12.5	1995720	1999565	NCU03658		7.30397	7.66091	0.35694	gray
Supercontig_12.1	2858851	2860711	930.5	-0.35663	7.53839	0.00121844	peaks1_common	164.287	210.358		Supercontig_12.1	2858850	2860711	NCU02597		7.36008	7.71671	0.35663	gray
Supercontig_12.6	1202055	1206179	2062.5	-0.35569	7.55842	0.00126414	peaks1_common	166.638	213.23		Supercontig_12.6	1202054	1206179	NCU05650		7.38058	7.73626	0.35569	gray
Supercontig_12.1	863464	872329	4433	-0.35536	7.51696	0.00133573	peaks1_common	161.936	207.166		Supercontig_12.1	863463	872329	NCU09104		7.33928	7.69464	0.35536	gray
Supercontig_12.6	1114963	1118731	1884.5	-0.35528	7.46723	0.00139412	peaks1_common	156.453	200.141		Supercontig_12.6	1114962	1118731	NCU09787		7.28959	7.64487	0.35528	gray
Supercontig_12.7	984323	986618	1148	-0.35508	7.57161	0.00113954	peaks1_common	168.204	215.143		Supercontig_12.7	984322	986618	NCU09565		7.39407	7.74915	0.35508	gray
Supercontig_12.2	1650714	1654419	1853	-0.35474	7.53054	0.00136831	peaks1_common	163.503	209.08		Supercontig_12.2	1650713	1654419	NCU05454		7.35317	7.70791	0.35474	gray
Supercontig_12.2	4451075	4452364	645	-0.35434	10.298	4.4957e-11	peaks1_common	1113.43	1423.41		Supercontig_12.2	4451074	4452364	NCU09491		10.1208	10.4751	0.35434	gray
Supercontig_12.5	6403231	6405076	923	-0.35434	8.07776	0.000311216	peaks1_common	238.954	305.479		Supercontig_12.5	6403230	6405076	NCU07155		7.90059	8.25493	0.35434	gray
Supercontig_12.6	1151224	1153120	948.5	-0.35367	7.39237	0.00181666	peaks1_common	148.625	189.914		Supercontig_12.6	1151223	1153120	NCU09794		7.21554	7.56921	0.35367	gray
Supercontig_12.7	47166	49774	1304.5	-0.35364	7.87898	0.000526126	peaks1_common	208.248	266.095		Supercontig_12.7	47165	49774	NCU09294		7.70216	8.0558	0.35364	gray
Supercontig_12.5	6177261	6177892	316	-0.35347	11.2672	5.18091e-19	peaks1_common	2180.53	2785.91		Supercontig_12.5	6177260	6177892	NCU07229		11.0905	11.4439	0.35347	gray
Supercontig_12.1	8421459	8425383	1962.5	-0.35306	7.34578	0.00192306	peaks1_common	143.933	183.84		Supercontig_12.1	8421458	8425383	NCU03020		7.16925	7.52231	0.35306	gray
Supercontig_12.4	3307138	3310773	1818	-0.35306	7.34578	0.00192306	peaks1_common	143.933	183.84		Supercontig_12.4	3307137	3310773	NCU04453		7.16925	7.52231	0.35306	gray
Supercontig_12.4	5878979	5881084	1053	-0.353	10.8248	1.06801e-14	peaks1_common	1604.99	2049.92		Supercontig_12.4	5878978	5881084	NCU05173		10.6484	11.0013	0.353	gray
Supercontig_12.4	4084738	4085904	583.5	-0.35298	7.46606	0.00139412	peaks1_common	156.451	199.819		Supercontig_12.4	4084737	4085904	NCU10457		7.28957	7.64255	0.35298	gray
Supercontig_12.7	3716590	3720109	1760	-0.35275	7.41451	0.00165682	peaks1_common	150.972	192.79		Supercontig_12.7	3716589	3720109	NCU05754		7.23813	7.59088	0.35275	gray
Supercontig_12.1	423885	427947	2031.5	-0.35268	7.47311	0.00141155	peaks1_common	157.234	200.777		Supercontig_12.1	423884	427947	NCU07492		7.29677	7.64945	0.35268	gray
Supercontig_12.4	2405543	2407336	897	-0.35235	7.29762	0.00203612	peaks1_common	139.241	177.761		Supercontig_12.4	2405542	2407336	NCU16789		7.12145	7.4738	0.35235	gray
Supercontig_12.2	1025913	1028077	1082.5	-0.35177	7.59658	0.00105271	peaks1_common	171.337	218.648		Supercontig_12.2	1025912	1028077	NCU03346		7.4207	7.77247	0.35177	gray
Supercontig_12.5	4559876	4562322	1223.5	-0.35174	7.31342	0.00208489	peaks1_common	140.805	179.68		Supercontig_12.5	4559875	4562322	NCU09551		7.13755	7.48929	0.35174	gray
Supercontig_12.2	1927839	1930419	1290.5	-0.35166	7.54957	0.0012489	peaks1_common	165.851	211.63		Supercontig_12.2	1927838	1930419	NCU06791		7.37374	7.7254	0.35166	gray
Supercontig_12.3	4417159	4421983	2412.5	-0.35137	7.55622	0.00126414	peaks1_common	166.634	212.586		Supercontig_12.3	4417158	4421983	NCU07546		7.38054	7.73191	0.35137	gray
Supercontig_12.7	1353460	1355271	906	-0.35128	11.3139	2.40997e-19	peaks1_common	2253.97	2875.37		Supercontig_12.7	1353459	1355271	NCU09724		11.1382	11.4895	0.35128	gray
Supercontig_12.6	3995580	3998227	1324	-0.35051	7.576	0.00129463	peaks1_common	168.984	215.457		Supercontig_12.6	3995579	3998227	NCU05029		7.40074	7.75126	0.35051	gray
Supercontig_12.2	3430413	3433316	1452	-0.35038	7.47194	0.00158504	peaks1_common	157.232	200.454		Supercontig_12.2	3430412	3433316	NCU08504		7.29675	7.64713	0.35038	gray
Supercontig_12.5	3164255	3165596	671	-0.35009	7.47896	0.00160363	peaks1_common	158.015	201.412		Supercontig_12.5	3164254	3165596	NCU01185		7.30391	7.654	0.35009	gray
Supercontig_12.1	6004604	6006823	1110	-0.34986	7.68524	0.000956866	peaks1_common	182.318	232.352		Supercontig_12.1	6004603	6006823	NCU07416		7.51031	7.86017	0.34986	gray
Supercontig_12.1	464411	467155	1372.5	-0.34978	7.42788	0.0019014	peaks1_common	152.534	194.385		Supercontig_12.1	464410	467155	NCU07483		7.25299	7.60277	0.34978	gray
Supercontig_12.1	615714	618210	1248.5	-0.34938	7.37493	0.0019912	peaks1_common	147.058	187.354		Supercontig_12.1	615713	618210	NCU07442		7.20024	7.54962	0.34938	gray
Supercontig_12.7	4179144	4186474	3665.5	-0.34865	7.56835	0.00127938	peaks1_common	168.199	214.179		Supercontig_12.7	4179143	4186474	NCU05891		7.39402	7.74267	0.34865	gray
Supercontig_12.3	1510314	1525616	7651.5	-0.34864	7.45662	0.00175617	peaks1_common	155.665	198.217		Supercontig_12.3	1510313	1525616	NCU06468		7.2823	7.63094	0.34864	gray
Supercontig_12.1	9620142	9623839	1849	-0.34851	7.71528	0.000895735	peaks1_common	186.241	237.13		Supercontig_12.1	9620141	9623839	NCU08618		7.54102	7.88953	0.34851	gray
Supercontig_12.1	9258233	9259178	473	-0.34837	7.57491	0.00129463	peaks1_common	168.982	215.134		Supercontig_12.1	9258232	9259178	NCU02769		7.40072	7.7491	0.34837	gray
Supercontig_12.2	2521754	2523872	1059.5	-0.34829	7.62745	0.001106	peaks1_common	175.254	223.107		Supercontig_12.2	2521753	2523872	NCU01761		7.4533	7.8016	0.34829	gray
Supercontig_12.7	1851057	1854368	1656	-0.34771	7.27898	0.00253429	peaks1_common	137.675	175.197		Supercontig_12.7	1851056	1854368	NCU06089		7.10512	7.45284	0.34771	gray
Supercontig_12.7	3939651	3942251	1300.5	-0.34771	7.73301	0.000928636	peaks1_common	188.596	239.996		Supercontig_12.7	3939650	3942251	NCU05822		7.55916	7.90686	0.34771	gray
Supercontig_12.6	2709658	2712357	1350	-0.34762	7.6903	0.000968558	peaks1_common	183.1	232.988		Supercontig_12.6	2709657	2712357	NCU03862		7.51649	7.86411	0.34762	gray
Supercontig_12.3	584541	585538	499	-0.34731	8.06465	0.000340262	peaks1_common	237.37	301.979		Supercontig_12.3	584540	585538	NCU05707		7.891	8.2383	0.34731	gray
Supercontig_12.1	5181494	5182898	702.5	-0.34726	7.49175	0.00164076	peaks1_common	159.578	203.006		Supercontig_12.1	5181493	5182898	NCU03287		7.31812	7.66538	0.34726	gray
Supercontig_12.1	7456079	7457894	908	-0.34702	7.60731	0.00121082	peaks1_common	172.901	219.918		Supercontig_12.1	7456078	7457894	NCU16443		7.4338	7.78082	0.34702	gray
Supercontig_12.3	1769080	1771558	1239.5	-0.34687	7.30291	0.00231245	peaks1_common	140.019	178.075		Supercontig_12.3	1769079	1771558	NCU06175		7.12947	7.47634	0.34687	gray
Supercontig_12.1	1559715	1564953	2619.5	-0.34677	7.56065	0.00126414	peaks1_common	167.413	212.9		Supercontig_12.1	1559714	1564953	NCU02048		7.38726	7.73403	0.34677	gray
Supercontig_12.2	774015	776822	1404	-0.34631	7.45544	0.00175617	peaks1_common	155.663	197.895		Supercontig_12.2	774014	776822	NCU03422		7.28229	7.62859	0.34631	gray
Supercontig_12.7	1662671	1664247	788.5	-0.34631	7.45544	0.00175617	peaks1_common	155.663	197.895		Supercontig_12.7	1662670	1664247	NCU06141		7.28229	7.62859	0.34631	gray
Supercontig_12.2	3883967	3886016	1025	-0.34624	7.84772	0.000630085	peaks1_common	204.308	259.725		Supercontig_12.2	3883966	3886016	NCU08750		7.6746	8.02084	0.34624	gray
Supercontig_12.5	5260169	5262975	1403.5	-0.3461	7.3961	0.00181666	peaks1_common	149.401	189.907		Supercontig_12.5	5260168	5262975	NCU04222		7.22305	7.56915	0.3461	gray
Supercontig_12.6	2409637	2412877	1620.5	-0.34597	7.58037	0.00130988	peaks1_common	169.764	215.771		Supercontig_12.6	2409636	2412877	NCU03952		7.40738	7.75336	0.34597	gray
Supercontig_12.1	6978756	6980502	873.5	-0.34583	7.4035	0.0018379	peaks1_common	150.184	190.866		Supercontig_12.1	6978755	6980502	NCU00845		7.23059	7.57642	0.34583	gray
Supercontig_12.6	138282	140161	940	-0.3458	8.20531	0.000235754	peaks1_common	261.816	332.73		Supercontig_12.6	138281	140161	NCU07112		8.03241	8.37821	0.3458	gray
Supercontig_12.7	2948481	2951389	1454.5	-0.34578	7.46961	0.00158504	peaks1_common	157.229	199.812		Supercontig_12.7	2948480	2951389	NCU02316		7.29672	7.6425	0.34578	gray
Supercontig_12.3	2987458	2989844	1193.5	-0.34571	7.58688	0.00132513	peaks1_common	170.547	216.727		Supercontig_12.3	2987457	2989844	NCU00201		7.41402	7.75974	0.34571	gray
Supercontig_12.7	4008880	4011219	1170	-0.34545	8.03955	0.000362636	peaks1_common	233.427	296.579		Supercontig_12.7	4008879	4011219	NCU05838		7.86682	8.21228	0.34545	gray
Supercontig_12.4	5416304	5417974	835.5	-0.34524	7.34962	0.00218168	peaks1_common	144.708	183.831		Supercontig_12.4	5416303	5417974	NCU16889		7.177	7.52224	0.34524	gray
Supercontig_12.1	6014673	6022290	3809	-0.34498	7.35726	0.00194582	peaks1_common	145.489	184.791		Supercontig_12.1	6014672	6022290	NCU07412		7.18477	7.52975	0.34498	gray
Supercontig_12.3	3395281	3399583	2151.5	-0.34471	7.36486	0.00196854	peaks1_common	146.272	185.75		Supercontig_12.3	3395280	3399583	NCU00310		7.1925	7.53721	0.34471	gray
Supercontig_12.3	1478836	1483746	2455.5	-0.3445	7.21033	0.00262991	peaks1_common	131.424	166.87		Supercontig_12.3	1478835	1483746	NCU06459		7.03808	7.38258	0.3445	gray
Supercontig_12.4	3229362	3231255	947	-0.34428	7.76687	0.000869508	peaks1_common	193.304	245.403		Supercontig_12.4	3229361	3231255	NCU04476		7.59473	7.93901	0.34428	gray
Supercontig_12.4	5644611	5649671	2530.5	-0.34409	7.57274	0.00144971	peaks1_common	168.978	214.493		Supercontig_12.4	5644610	5649671	NCU05239		7.4007	7.74479	0.34409	gray
Supercontig_12.4	5733357	5735851	1247.5	-0.34391	7.81851	0.000753717	peaks1_common	200.374	254.314		Supercontig_12.4	5733356	5735851	NCU05212		7.64655	7.99046	0.34391	gray
Supercontig_12.3	1140129	1142537	1204.5	-0.34322	7.47547	0.00179571	peaks1_common	158.009	200.447		Supercontig_12.3	1140128	1142537	NCU07862		7.30386	7.64708	0.34322	gray
Supercontig_12.1	4556599	4560052	1727	-0.34293	7.54513	0.0015681	peaks1_common	165.842	210.342		Supercontig_12.1	4556598	4560052	NCU03101		7.37367	7.71659	0.34293	gray
Supercontig_12.1	4776923	4780150	1614	-0.34293	7.54513	0.0015681	peaks1_common	165.842	210.342		Supercontig_12.1	4776922	4780150	NCU03169		7.37367	7.71659	0.34293	gray
Supercontig_12.7	1862914	1865219	1153	-0.34223	7.3636	0.00220571	peaks1_common	146.269	185.428		Supercontig_12.7	1862913	1865219	NCU06085		7.19248	7.53471	0.34223	gray
Supercontig_12.1	8501413	8505613	2100.5	-0.34193	7.29233	0.00256159	peaks1_common	139.234	176.472		Supercontig_12.1	8501412	8505613	NCU02988		7.12137	7.46329	0.34193	gray
Supercontig_12.2	246107	248791	1342.5	-0.34148	7.38618	0.00227737	peaks1_common	148.615	188.304		Supercontig_12.2	246106	248791	NCU03554		7.21544	7.55692	0.34148	gray
Supercontig_12.4	5761057	5764690	1817	-0.34147	7.5238	0.00151601	peaks1_common	163.491	207.15		Supercontig_12.4	5761056	5764690	NCU05204		7.35307	7.69454	0.34147	gray
Supercontig_12.1	6466804	6469993	1595	-0.34076	7.80555	0.000833662	peaks1_common	198.799	251.764		Supercontig_12.1	6466803	6469993	NCU00992		7.63517	7.97593	0.34076	gray
Supercontig_12.6	638612	641773	1581	-0.34026	7.42305	0.00212606	peaks1_common	152.527	193.097		Supercontig_12.6	638611	641773	NCU04743		7.25292	7.59318	0.34026	gray
Supercontig_12.3	2722532	2726114	1791.5	-0.34019	7.49523	0.00164076	peaks1_common	160.356	202.998		Supercontig_12.3	2722531	2726114	NCU00128		7.32513	7.66532	0.34019	gray
Supercontig_12.4	4772613	4778714	3051	-0.34019	7.49523	0.00164076	peaks1_common	160.356	202.998		Supercontig_12.4	4772612	4778714	NCU06984		7.32513	7.66532	0.34019	gray
Supercontig_12.3	4825346	4825846	250.5	-0.33956	11.0849	5.48805e-16	peaks1_common	1930.96	2443.38		Supercontig_12.3	4825345	4825846	NCU16705		10.9151	11.2547	0.33956	gray
Supercontig_12.2	4022392	4024482	1045.5	-0.33886	7.59661	0.00134037	peaks1_common	172.109	217.676		Supercontig_12.2	4022391	4024482	NCU10245		7.42718	7.76604	0.33886	gray
Supercontig_12.5	2685463	2687523	1030.5	-0.33856	7.39981	0.00205888	peaks1_common	150.178	189.899		Supercontig_12.5	2685462	2687523	NCU01014		7.23053	7.56909	0.33856	gray
Supercontig_12.5	2461628	2464178	1275.5	-0.33838	7.48015	0.00181543	peaks1_common	158.788	200.762		Supercontig_12.5	2461627	2464178	NCU03802		7.31096	7.64934	0.33838	gray
Supercontig_12.3	2748546	2751023	1239	-0.33765	7.42911	0.0019014	peaks1_common	153.308	193.734		Supercontig_12.3	2748545	2751023	NCU00136		7.26029	7.59793	0.33765	gray
Supercontig_12.5	3015678	3017952	1137.5	-0.33747	7.35345	0.00218168	peaks1_common	145.484	183.824		Supercontig_12.5	3015677	3017952	NCU01144		7.18472	7.52219	0.33747	gray
Supercontig_12.4	4308433	4309344	456	-0.33708	8.23951	0.000256957	peaks1_common	268.908	339.684		Supercontig_12.4	4308432	4309344	NCU07341		8.07097	8.40805	0.33708	gray
Supercontig_12.2	2681847	2684269	1211.5	-0.33674	7.59553	0.00149847	peaks1_common	172.107	217.354		Supercontig_12.2	2681846	2684269	NCU01701		7.42716	7.7639	0.33674	gray
Supercontig_12.6	3206660	3209551	1446	-0.33653	7.46491	0.00177595	peaks1_common	157.22	198.525		Supercontig_12.6	3206659	3209551	NCU05980		7.29664	7.63317	0.33653	gray
Supercontig_12.7	1515881	1520041	2080.5	-0.33581	7.32126	0.00236385	peaks1_common	142.356	179.665		Supercontig_12.7	1515880	1520041	NCU04538		7.15336	7.48917	0.33581	gray
Supercontig_12.4	88972	94494	2761.5	-0.33501	7.64631	0.00128226	peaks1_common	178.379	225.005		Supercontig_12.4	88971	94494	NCU09657		7.4788	7.81381	0.33501	gray
Supercontig_12.1	7694226	7697784	1779.5	-0.33484	7.44234	0.00217055	peaks1_common	154.871	195.329		Supercontig_12.1	7694225	7697784	NCU00650		7.27492	7.60976	0.33484	gray
Supercontig_12.2	3756943	3760900	1979	-0.33463	7.4495	0.0021927	peaks1_common	155.653	196.286		Supercontig_12.2	3756942	3760900	NCU08709		7.28219	7.61682	0.33463	gray
Supercontig_12.2	3837747	3840081	1167.5	-0.33463	7.59446	0.00149847	peaks1_common	172.105	217.034		Supercontig_12.2	3837746	3840081	NCU08737		7.42715	7.76177	0.33463	gray
Supercontig_12.3	4823696	4824538	421.5	-0.33426	11.0054	6.78831e-15	peaks1_common	1830.78	2308.12		Supercontig_12.3	4823695	4824538	NCU08265		10.8382	11.1725	0.33426	gray
Supercontig_12.5	5216806	5220927	2061	-0.33415	7.54067	0.0017516	peaks1_common	165.834	209.056		Supercontig_12.5	5216805	5220927	NCU04212		7.37359	7.70775	0.33415	gray
Supercontig_12.1	8976446	8979513	1534	-0.33391	7.38991	0.00227737	peaks1_common	149.392	188.297		Supercontig_12.1	8976445	8979513	NCU02828		7.22296	7.55686	0.33391	gray
Supercontig_12.1	7501963	7504280	1159	-0.33379	7.62009	0.00138611	peaks1_common	175.241	220.859		Supercontig_12.1	7501962	7504280	NCU00699		7.45319	7.78699	0.33379	gray
Supercontig_12.2	1049668	1051643	988	-0.33379	7.47781	0.00202723	peaks1_common	158.783	200.118		Supercontig_12.2	1049667	1051643	NCU03337		7.31092	7.6447	0.33379	gray
Supercontig_12.1	7077348	7079923	1288	-0.3337	7.39734	0.00230111	peaks1_common	150.174	189.255		Supercontig_12.1	7077347	7079923	NCU00812		7.23049	7.56419	0.3337	gray
Supercontig_12.3	3595562	3598471	1455	-0.3337	7.39734	0.00230111	peaks1_common	150.174	189.255		Supercontig_12.3	3595561	3598471	NCU00367		7.23049	7.56419	0.3337	gray
Supercontig_12.5	5971303	5974966	1832	-0.33364	10.4525	5.37002e-11	peaks1_common	1248.25	1573.03		Supercontig_12.5	5971302	5974966	NCU09856		10.2857	10.6193	0.33364	gray
Supercontig_12.2	3464724	3465674	475.5	-0.33358	7.62643	0.00140135	peaks1_common	176.025	221.816		Supercontig_12.2	3464723	3465674	NCU08497		7.45964	7.79322	0.33358	gray
Supercontig_12.6	2752325	2754182	929	-0.3334	8.06237	0.000482227	peaks1_common	238.141	300.052		Supercontig_12.6	2752324	2754182	NCU03848		7.89567	8.22907	0.3334	gray
Supercontig_12.4	47390	50877	1744	-0.3334	9.00986	1.19243e-05	peaks1_common	459.258	578.655		Supercontig_12.4	47389	50877	NCU09643		8.84316	9.17656	0.3334	gray
Supercontig_12.1	9359863	9362512	1325	-0.33338	7.20469	0.00294761	peaks1_common	131.416	165.579		Supercontig_12.1	9359862	9362512	NCU09265		7.038	7.37138	0.33338	gray
Supercontig_12.1	162307	163765	729.5	-0.33333	7.69536	0.0012399	peaks1_common	184.656	232.651		Supercontig_12.1	162306	163765	NCU08068		7.5287	7.86203	0.33333	gray
Supercontig_12.4	3689774	3691672	949.5	-0.33317	7.49869	0.00185477	peaks1_common	161.133	202.991		Supercontig_12.4	3689773	3691672	NCU16821		7.33211	7.66528	0.33317	gray
Supercontig_12.5	94489	97174	1343	-0.33309	7.4194	0.00237185	peaks1_common	152.52	192.131		Supercontig_12.5	94488	97174	NCU08861		7.25286	7.58595	0.33309	gray
Supercontig_12.2	1387878	1389833	978	-0.33276	7.6515	0.00129655	peaks1_common	179.162	225.64		Supercontig_12.2	1387877	1389833	NCU05346		7.48512	7.81788	0.33276	gray
Supercontig_12.7	4197610	4199022	706.5	-0.33276	10.9471	2.34306e-14	peaks1_common	1759.2	2215.57		Supercontig_12.7	4197609	4199022	NCU05896		10.7807	11.1135	0.33276	gray
Supercontig_12.1	1284306	1287607	1651	-0.33264	7.34322	0.00272302	peaks1_common	144.698	182.22		Supercontig_12.1	1284305	1287607	NCU02101		7.1769	7.50954	0.33264	gray
Supercontig_12.1	6028440	6032698	2129.5	-0.33244	7.3509	0.0024403	peaks1_common	145.48	183.18		Supercontig_12.1	6028439	6032698	NCU07411		7.18468	7.51712	0.33244	gray
Supercontig_12.4	4104617	4109427	2405.5	-0.33201	7.26279	0.00313089	peaks1_common	136.882	172.302		Supercontig_12.4	4104616	4109427	NCU08685		7.09679	7.42879	0.33201	gray
Supercontig_12.7	3772847	3774169	661.5	-0.33188	7.46255	0.00198547	peaks1_common	157.217	197.881		Supercontig_12.7	3772846	3774169	NCU10416		7.29661	7.62849	0.33188	gray
Supercontig_12.3	3242122	3245219	1549	-0.33175	7.54625	0.00176998	peaks1_common	166.615	209.692		Supercontig_12.3	3242121	3245219	NCU00270		7.38037	7.71212	0.33175	gray
Supercontig_12.4	239980	242931	1476	-0.33162	8.58898	8.6042e-05	peaks1_common	343.263	431.971		Supercontig_12.4	239979	242931	NCU07607		8.42317	8.75479	0.33162	gray
Supercontig_12.2	1617231	1619394	1082	-0.33155	7.55292	0.00158543	peaks1_common	167.399	210.649		Supercontig_12.2	1617230	1619394	NCU05433		7.38715	7.71869	0.33155	gray
Supercontig_12.3	1037469	1041521	2026.5	-0.3309	7.49754	0.00185477	peaks1_common	161.131	202.67		Supercontig_12.3	1037468	1041521	NCU07839		7.33209	7.66299	0.3309	gray
Supercontig_12.2	101812	102821	505	-0.33064	8.2903	0.000258939	peaks1_common	279.166	351.071		Supercontig_12.2	101811	102821	NCU16500		8.12498	8.45562	0.33064	gray
Supercontig_12.2	3332319	3337925	2803.5	-0.33032	7.51813	0.00169629	peaks1_common	163.48	205.542		Supercontig_12.2	3332318	3337925	NCU01486		7.35297	7.68329	0.33032	gray
Supercontig_12.3	3290243	3294924	2341	-0.33029	7.33421	0.0026964	peaks1_common	143.914	180.938		Supercontig_12.3	3290242	3294924	NCU00281		7.16907	7.49935	0.33029	gray
Supercontig_12.1	7991327	7993627	1150.5	-0.32974	7.35726	0.0024656	peaks1_common	146.26	183.817		Supercontig_12.1	7991326	7993627	NCU00562		7.19239	7.52213	0.32974	gray
Supercontig_12.6	1132762	1135968	1603.5	-0.3295	7.25326	0.00310076	peaks1_common	136.099	171.019		Supercontig_12.6	1132761	1135968	NCU09791		7.08851	7.41801	0.3295	gray
Supercontig_12.1	2265841	2267170	665	-0.32905	7.63693	0.00159564	peaks1_common	177.59	223.086		Supercontig_12.1	2265840	2267170	NCU01849		7.4724	7.80146	0.32905	gray
Supercontig_12.6	1566612	1569457	1423	-0.32897	7.27762	0.00283387	peaks1_common	138.442	173.899		Supercontig_12.6	1566611	1569457	NCU05543		7.11313	7.4421	0.32897	gray
Supercontig_12.1	7902755	7905805	1525.5	-0.32882	7.39486	0.00230111	peaks1_common	150.17	188.611		Supercontig_12.1	7902754	7905805	NCU00591		7.23045	7.55927	0.32882	gray
Supercontig_12.2	3068629	3072190	1781	-0.32862	7.49638	0.00206878	peaks1_common	161.129	202.347		Supercontig_12.2	3068628	3072190	NCU01565		7.33207	7.66069	0.32862	gray
Supercontig_12.4	1935594	1937371	889	-0.32862	7.49638	0.00206878	peaks1_common	161.129	202.347		Supercontig_12.4	1935593	1937371	NCU09747		7.33207	7.66069	0.32862	gray
Supercontig_12.1	5909898	5911777	940	-0.32825	7.59122	0.00167182	peaks1_common	172.099	216.069		Supercontig_12.1	5909897	5911777	NCU09226		7.42709	7.75535	0.32825	gray
Supercontig_12.4	2741158	2743124	983.5	-0.32807	7.59769	0.00168903	peaks1_common	172.883	217.026		Supercontig_12.4	2741157	2743124	NCU06375		7.43366	7.76173	0.32807	gray
Supercontig_12.7	3484873	3488456	1792	-0.32792	7.32515	0.00266967	peaks1_common	143.131	179.658		Supercontig_12.7	3484872	3488456	NCU08134		7.16119	7.48911	0.32792	gray
Supercontig_12.1	7409991	7412312	1161	-0.32757	7.34065	0.00272302	peaks1_common	144.694	181.577		Supercontig_12.1	7409990	7412312	NCU00724		7.17686	7.50444	0.32757	gray
Supercontig_12.1	1774672	1778095	1712	-0.32721	7.46018	0.00221478	peaks1_common	157.213	197.237		Supercontig_12.1	1774671	1778095	NCU01985		7.29657	7.62379	0.32721	gray
Supercontig_12.7	1841954	1844712	1379.5	-0.32718	7.5507	0.00176998	peaks1_common	167.395	210.006		Supercontig_12.7	1841953	1844712	NCU10715		7.38711	7.71429	0.32718	gray
Supercontig_12.3	4735926	4738698	1386.5	-0.32698	11.0712	5.89859e-15	peaks1_common	1921.05	2409.74		Supercontig_12.3	4735925	4738698	NCU08235		10.9077	11.2347	0.32698	gray
Supercontig_12.2	2954621	2957700	1540	-0.32671	7.37868	0.00282829	peaks1_common	148.604	186.371		Supercontig_12.2	2954620	2957700	NCU01613		7.21532	7.54203	0.32671	gray
Supercontig_12.5	6025496	6026290	397.5	-0.32661	10.8296	4.88272e-13	peaks1_common	1625.06	2037.92		Supercontig_12.5	6025495	6026290	NCU09948		10.6663	10.9929	0.32661	gray
Supercontig_12.7	1149635	1152060	1213	-0.32658	7.94476	0.00075835	peaks1_common	220.017	275.909		Supercontig_12.7	1149634	1152060	NCU09429		7.78147	8.10805	0.32658	gray
Supercontig_12.5	3165847	3168676	1415	-0.32652	7.48828	0.00204803	peaks1_common	160.343	201.068		Supercontig_12.5	3165846	3168676	NCU01186		7.32502	7.65154	0.32652	gray
Supercontig_12.5	5292629	5294790	1081	-0.32633	7.12187	0.00383632	peaks1_common	124.388	155.96		Supercontig_12.5	5292628	5294790	NCU04231		6.95871	7.28504	0.32633	gray
Supercontig_12.7	960314	963672	1679.5	-0.32627	8.00031	0.000673706	peaks1_common	228.678	286.709		Supercontig_12.7	960313	963672	NCU09573		7.83718	8.16344	0.32627	gray
Supercontig_12.5	2327176	2329517	1171	-0.32595	7.59661	0.00168903	peaks1_common	172.881	216.704		Supercontig_12.5	2327175	2329517	NCU03759		7.43364	7.75958	0.32595	gray
Supercontig_12.5	5301948	5304091	1072	-0.32554	7.4303	0.00239527	peaks1_common	154.079	193.082		Supercontig_12.5	5301947	5304091	NCU04234		7.26753	7.59307	0.32554	gray
Supercontig_12.1	5660231	5661031	400.5	-0.32543	7.61584	0.00154712	peaks1_common	175.232	219.573		Supercontig_12.1	5660230	5661031	NCU08351		7.45312	7.77856	0.32543	gray
Supercontig_12.1	2042662	2045057	1198	-0.32521	7.44472	0.00244187	peaks1_common	155.645	194.999		Supercontig_12.1	2042661	2045057	NCU01916		7.28211	7.60732	0.32521	gray
Supercontig_12.1	9104963	9108106	1572	-0.32487	7.34705	0.00272302	peaks1_common	145.474	182.213		Supercontig_12.1	9104962	9108106	NCU10987		7.18462	7.50949	0.32487	gray
Supercontig_12.1	4548662	4550883	1111	-0.32455	7.36232	0.00277589	peaks1_common	147.038	184.132		Supercontig_12.1	4548661	4550883	NCU03099		7.20005	7.52459	0.32455	gray
Supercontig_12.4	1998208	2002351	2072	-0.32415	7.58255	0.00184318	peaks1_common	171.311	214.469		Supercontig_12.4	1998207	2002351	NCU09730		7.42047	7.74462	0.32415	gray
Supercontig_12.7	754567	757904	1669	-0.32346	7.41451	0.00263997	peaks1_common	152.512	190.843		Supercontig_12.7	754566	757904	NCU06914		7.25278	7.57624	0.32346	gray
Supercontig_12.1	3972683	3974681	999.5	-0.32334	7.61478	0.00172338	peaks1_common	175.23	219.253		Supercontig_12.1	3972682	3974681	NCU09892		7.45311	7.77645	0.32334	gray
Supercontig_12.2	3264427	3269512	2543	-0.32326	7.69636	0.00138229	peaks1_common	185.43	232.001		Supercontig_12.2	3264426	3269512	NCU01498		7.53473	7.85799	0.32326	gray
Supercontig_12.1	6377952	6381151	1600	-0.32317	8.04278	0.000652211	peaks1_common	235.763	294.958		Supercontig_12.1	6377951	6381151	NCU09874		7.88119	8.20436	0.32317	gray
Supercontig_12.6	911974	913950	988.5	-0.32277	7.32253	0.00297548	peaks1_common	143.126	179.012		Supercontig_12.6	911973	913950	NCU04812		7.16114	7.48391	0.32277	gray
Supercontig_12.4	2918541	2922805	2132.5	-0.32269	7.45068	0.0021927	peaks1_common	156.426	195.636		Supercontig_12.4	2918540	2922805	NCU06322		7.28934	7.61202	0.32269	gray
Supercontig_12.3	1247224	1249624	1200.5	-0.32247	7.56176	0.00201055	peaks1_common	168.958	211.277		Supercontig_12.3	1247223	1249624	NCU11353		7.40053	7.72299	0.32247	gray
Supercontig_12.3	1937493	1940150	1329	-0.32233	7.34576	0.00272302	peaks1_common	145.472	181.89		Supercontig_12.3	1937492	1940150	NCU06217		7.1846	7.50693	0.32233	gray
Supercontig_12.7	3903454	3905928	1237.5	-0.32216	7.57492	0.00204905	peaks1_common	170.525	213.191		Supercontig_12.7	3903453	3905928	NCU05808		7.41384	7.736	0.32216	gray
Supercontig_12.1	4593577	4597327	1875.5	-0.32176	7.37616	0.00282829	peaks1_common	148.599	185.727		Supercontig_12.1	4593576	4597327	NCU03110		7.21528	7.53704	0.32176	gray
Supercontig_12.2	3233926	3237493	1784	-0.32163	7.49982	0.00232418	peaks1_common	161.905	202.34		Supercontig_12.2	3233925	3237493	NCU01509		7.339	7.66064	0.32163	gray
Supercontig_12.2	2468053	2470046	997	-0.32139	7.60732	0.00170621	peaks1_common	174.445	217.974		Supercontig_12.2	2468052	2470046	NCU01779		7.44662	7.76802	0.32139	gray
Supercontig_12.2	1035016	1036416	700.5	-0.32133	7.51356	0.00211012	peaks1_common	163.471	204.255		Supercontig_12.2	1035015	1036416	NCU03343		7.35289	7.67422	0.32133	gray
Supercontig_12.3	3026319	3030346	2014	-0.32103	7.52717	0.00215123	peaks1_common	165.038	206.169		Supercontig_12.3	3026318	3030346	NCU00213		7.36665	7.68769	0.32103	gray
Supercontig_12.7	1370478	1371973	748	-0.32078	8.11215	0.00059821	peaks1_common	247.582	309.231		Supercontig_12.7	1370477	1371973	NCU09717		7.95176	8.27254	0.32078	gray
Supercontig_12.6	3213964	3218034	2035.5	-0.32059	7.54735	0.00197186	peaks1_common	167.388	209.041		Supercontig_12.6	3213963	3218034	NCU05978		7.38705	7.70765	0.32059	gray
Supercontig_12.5	160421	163953	1766.5	-0.32045	7.30551	0.00327903	peaks1_common	141.561	176.771		Supercontig_12.5	160420	163953	NCU08848		7.14529	7.46574	0.32045	gray
Supercontig_12.7	2996698	2997616	459.5	-0.32029	7.56065	0.00201055	peaks1_common	168.956	210.956		Supercontig_12.7	2996697	2997616	NCU02303		7.4005	7.7208	0.32029	gray
Supercontig_12.2	2831269	2835334	2033	-0.3194	7.36735	0.0031135	peaks1_common	147.815	184.445		Supercontig_12.2	2831268	2835334	NCU01643		7.20765	7.52705	0.3194	gray
Supercontig_12.5	6119262	6119798	268.5	-0.31939	11.0952	1.27812e-14	peaks1_common	1958.42	2443.72		Supercontig_12.5	6119261	6119798	NCU07244		10.9355	11.2549	0.31939	gray
Supercontig_12.7	1037324	1039598	1137.5	-0.31914	7.90969	0.000891219	peaks1_common	215.287	268.59		Supercontig_12.7	1037323	1039598	NCU10051		7.75012	8.06926	0.31914	gray
Supercontig_12.3	2770605	2774213	1804.5	-0.31901	7.38988	0.0028543	peaks1_common	150.162	187.323		Supercontig_12.3	2770604	2774213	NCU00142		7.23037	7.54939	0.31901	gray
Supercontig_12.1	7580181	7582725	1272.5	-0.3188	7.52604	0.00215123	peaks1_common	165.036	205.849		Supercontig_12.1	7580180	7582725	NCU00680		7.36664	7.68544	0.3188	gray
Supercontig_12.4	5526379	5529412	1517	-0.3188	7.52604	0.00215123	peaks1_common	165.036	205.849		Supercontig_12.4	5526378	5529412	NCU05268		7.36664	7.68544	0.3188	gray
Supercontig_12.4	2657753	2660692	1470	-0.31878	7.23951	0.00342281	peaks1_common	135.31	168.768		Supercontig_12.4	2657752	2660692	NCU06393		7.08012	7.3989	0.31878	gray
Supercontig_12.3	1323353	1324768	708	-0.31866	7.5328	0.00217171	peaks1_common	165.82	206.805		Supercontig_12.3	1323352	1324768	NCU06415		7.37347	7.69213	0.31866	gray
Supercontig_12.3	1940204	1943687	1742	-0.31866	7.5328	0.00217171	peaks1_common	165.82	206.805		Supercontig_12.3	1940203	1943687	NCU06218		7.37347	7.69213	0.31866	gray
Supercontig_12.5	2061140	2069276	4068.5	-0.31852	7.53953	0.00219212	peaks1_common	166.603	207.762		Supercontig_12.5	2061139	2069276	NCU03685		7.38027	7.69879	0.31852	gray
Supercontig_12.1	9444660	9448137	1739	-0.31849	7.41937	0.00263997	peaks1_common	153.291	191.157		Supercontig_12.1	9444659	9448137	NCU09240		7.26013	7.57861	0.31849	gray
Supercontig_12.3	1437409	1439927	1259.5	-0.31797	7.44828	0.00244187	peaks1_common	156.422	194.991		Supercontig_12.3	1437408	1439927	NCU06446		7.2893	7.60726	0.31797	gray
Supercontig_12.2	1559014	1561693	1340	-0.31784	7.30419	0.00363879	peaks1_common	141.56	176.449		Supercontig_12.2	1559013	1561693	NCU05414		7.14527	7.46311	0.31784	gray
Supercontig_12.3	520322	523274	1476.5	-0.31772	7.89839	0.00108882	peaks1_common	213.713	266.363		Supercontig_12.3	520321	523274	NCU05691		7.73953	8.05725	0.31772	gray
Supercontig_12.2	4411258	4413129	936	-0.31766	7.96073	0.00087024	peaks1_common	223.155	278.119		Supercontig_12.2	4411257	4413129	NCU09480		7.8019	8.11956	0.31766	gray
Supercontig_12.4	3863370	3866895	1763	-0.31745	7.47662	0.00253404	peaks1_common	159.553	198.824		Supercontig_12.4	3863369	3866895	NCU07999		7.31789	7.63534	0.31745	gray
Supercontig_12.4	3908616	3910899	1142	-0.31733	7.48361	0.00228063	peaks1_common	160.335	199.781		Supercontig_12.4	3908615	3910899	NCU08011		7.32495	7.64227	0.31733	gray
Supercontig_12.2	4398179	4399974	898	-0.31714	7.91918	0.00101047	peaks1_common	216.858	270.175		Supercontig_12.2	4398178	4399974	NCU09474		7.76061	8.07775	0.31714	gray
Supercontig_12.5	3187194	3191098	1952.5	-0.31707	7.49751	0.00232418	peaks1_common	161.902	201.697		Supercontig_12.5	3187193	3191098	NCU01192		7.33898	7.65605	0.31707	gray
Supercontig_12.1	3265972	3267804	916.5	-0.31702	7.35849	0.00308619	peaks1_common	147.031	183.165		Supercontig_12.1	3265971	3267804	NCU02707		7.19998	7.517	0.31702	gray
Supercontig_12.7	3898069	3902881	2406.5	-0.31656	7.5249	0.00215123	peaks1_common	165.034	205.526		Supercontig_12.7	3898068	3902881	NCU05807		7.36662	7.68318	0.31656	gray
Supercontig_12.1	3445548	3449548	2000.5	-0.31631	7.40346	0.00290596	peaks1_common	151.724	188.918		Supercontig_12.1	3445547	3449548	NCU11228		7.24531	7.56161	0.31631	gray
Supercontig_12.1	5698364	5701597	1617	-0.31631	7.40346	0.00290596	peaks1_common	151.724	188.918		Supercontig_12.1	5698363	5701597	NCU08338		7.24531	7.56161	0.31631	gray
Supercontig_12.2	1591321	1594026	1353	-0.3163	7.53841	0.00243179	peaks1_common	166.602	207.441		Supercontig_12.2	1591320	1594026	NCU05423		7.38026	7.69656	0.3163	gray
Supercontig_12.3	5120965	5123062	1049	-0.31623	8.01003	0.000764955	peaks1_common	231.027	287.645		Supercontig_12.3	5120964	5123062	NCU08788		7.85191	8.16814	0.31623	gray
Supercontig_12.4	5868124	5869498	687.5	-0.31623	10.6336	3.64424e-11	peaks1_common	1423.79	1772.73		Supercontig_12.4	5868123	5869498	NCU05176		10.4755	10.7918	0.31623	gray
Supercontig_12.1	363634	366043	1205	-0.31594	7.75247	0.00134722	peaks1_common	193.274	240.591		Supercontig_12.1	363633	366043	NCU16311		7.5945	7.91044	0.31594	gray
Supercontig_12.2	3439048	3453094	7023.5	-0.31572	7.4399	0.00271319	peaks1_common	155.637	193.711		Supercontig_12.2	3439047	3453094	NCU08501		7.28204	7.59776	0.31572	gray
Supercontig_12.7	159486	162922	1718.5	-0.3157	7.67409	0.00167612	peaks1_common	183.069	227.85		Supercontig_12.7	159485	162922	NCU09432		7.51624	7.83194	0.3157	gray
Supercontig_12.3	4820893	4822548	828	-0.31535	10.8776	1.14643e-12	peaks1_common	1686.69	2098.77		Supercontig_12.3	4820892	4822548	NCU08264		10.72	11.0353	0.31535	gray
Supercontig_12.3	4456383	4460313	1965.5	-0.31534	7.85407	0.00112851	peaks1_common	207.418	258.092		Supercontig_12.3	4456382	4460313	NCU07535		7.6964	8.01174	0.31534	gray
Supercontig_12.7	1368619	1370024	703	-0.31467	7.72222	0.00159851	peaks1_common	189.347	235.495		Supercontig_12.7	1368618	1370024	NCU09718		7.56489	7.87956	0.31467	gray
Supercontig_12.7	4185262	4186199	469	-0.31458	8.11816	0.000604336	peaks1_common	249.15	309.855		Supercontig_12.7	4185261	4186199	NCU05892		7.96087	8.27545	0.31458	gray
Supercontig_12.4	5282382	5285066	1342.5	-0.31455	7.51012	0.00234585	peaks1_common	163.466	203.29		Supercontig_12.4	5282381	5285066	NCU09922		7.35285	7.6674	0.31455	gray
Supercontig_12.5	4361486	4364948	1731.5	-0.3145	7.35721	0.00308619	peaks1_common	147.029	182.843		Supercontig_12.5	4361485	4364948	NCU06714		7.19996	7.51446	0.3145	gray
Supercontig_12.6	3080312	3087794	3741.5	-0.31434	7.82038	0.00133691	peaks1_common	202.701	252.047		Supercontig_12.6	3080311	3087794	NCU06013		7.66321	7.97755	0.31434	gray
Supercontig_12.1	2798544	2801136	1296.5	-0.31429	7.37237	0.00314067	peaks1_common	148.593	184.761		Supercontig_12.1	2798543	2801136	NCU02580		7.21522	7.52951	0.31429	gray
Supercontig_12.4	4113262	4114751	745	-0.31387	7.40222	0.00290596	peaks1_common	151.722	188.596		Supercontig_12.4	4113261	4114751	NCU16833		7.24528	7.55916	0.31387	gray
Supercontig_12.5	1327586	1331540	1977.5	-0.31385	7.55067	0.00221247	peaks1_common	168.166	209.034		Supercontig_12.5	1327585	1331540	NCU04652		7.39374	7.70759	0.31385	gray
Supercontig_12.3	1301581	1304057	1238.5	-0.31324	7.44587	0.00271319	peaks1_common	156.417	194.347		Supercontig_12.3	1301580	1304057	NCU06409		7.28925	7.60249	0.31324	gray
Supercontig_12.2	2999267	3001255	994.5	-0.31315	7.59011	0.00208735	peaks1_common	172.869	214.775		Supercontig_12.2	2999266	3001255	NCU01595		7.43354	7.74669	0.31315	gray
Supercontig_12.5	5782504	5784122	809.5	-0.31269	7.61582	0.0019339	peaks1_common	176.005	218.602		Supercontig_12.5	5782503	5784122	NCU08944		7.45947	7.77216	0.31269	gray
Supercontig_12.2	1091218	1092875	829	-0.31265	7.81391	0.00132431	peaks1_common	201.912	250.772		Supercontig_12.2	1091217	1092875	NCU03328		7.65758	7.97023	0.31265	gray
Supercontig_12.4	3022503	3023327	412.5	-0.31253	8.02769	0.000788336	peaks1_common	234.172	290.814		Supercontig_12.4	3022502	3023327	NCU06289		7.87143	8.18395	0.31253	gray
Supercontig_12.1	163963	166034	1036	-0.3123	7.90621	0.00109936	peaks1_common	215.278	267.308		Supercontig_12.1	163962	166034	NCU08069		7.75006	8.06236	0.3123	gray
Supercontig_12.3	2564756	2565909	577	-0.31207	7.52262	0.00238897	peaks1_common	165.03	204.883		Supercontig_12.3	2564755	2565909	NCU00086		7.36659	7.67865	0.31207	gray
Supercontig_12.5	6033313	6034014	351	-0.31201	10.6116	8.11614e-11	peaks1_common	1404.31	1743.36		Supercontig_12.5	6033312	6034014	NCU09953		10.4556	10.7677	0.31201	gray
Supercontig_12.1	2481601	2483494	947	-0.31186	7.53615	0.00243179	peaks1_common	166.597	206.798		Supercontig_12.1	2481600	2483494	NCU02486		7.38022	7.69208	0.31186	gray
Supercontig_12.3	4186915	4189856	1471	-0.31179	7.3711	0.00347918	peaks1_common	148.591	184.438		Supercontig_12.3	4186914	4189856	NCU09003		7.2152	7.527	0.31179	gray
Supercontig_12.6	3151517	3156680	2582	-0.31165	7.54955	0.00221247	peaks1_common	168.164	208.713		Supercontig_12.6	3151516	3156680	NCU05994		7.39372	7.70537	0.31165	gray
Supercontig_12.4	69650	71006	678.5	-0.31153	10.1744	1.17261e-08	peaks1_common	1037.33	1287.36		Supercontig_12.4	69649	71006	NCU16719		10.0187	10.3302	0.31153	gray
Supercontig_12.1	2942854	2946733	1940	-0.31132	7.6903	0.00170816	peaks1_common	185.418	230.075		Supercontig_12.1	2942853	2946733	NCU02621		7.53464	7.84596	0.31132	gray
Supercontig_12.2	2276044	2278472	1214.5	-0.31114	7.42299	0.00295711	peaks1_common	154.068	191.15		Supercontig_12.2	2276043	2278472	NCU01824		7.26742	7.57856	0.31114	gray
Supercontig_12.4	4202614	4203142	264.5	-0.31093	7.80741	0.00145423	peaks1_common	201.125	249.496		Supercontig_12.4	4202613	4203142	NCU08657		7.65195	7.96288	0.31093	gray
Supercontig_12.1	2966608	2971973	2683	-0.31086	7.44467	0.00271319	peaks1_common	156.416	194.025		Supercontig_12.1	2966607	2971973	NCU02626		7.28924	7.6001	0.31086	gray
Supercontig_12.2	3727391	3732074	2342	-0.31086	7.44467	0.00271319	peaks1_common	156.416	194.025		Supercontig_12.2	3727390	3732074	NCU08700		7.28924	7.6001	0.31086	gray
Supercontig_12.4	2999707	3003118	1706	-0.31086	7.44467	0.00271319	peaks1_common	156.416	194.025		Supercontig_12.4	2999706	3003118	NCU06296		7.28924	7.6001	0.31086	gray
Supercontig_12.2	3767043	3769140	1049	-0.31039	7.48009	0.00253404	peaks1_common	160.329	198.815		Supercontig_12.2	3767042	3769140	NCU08712		7.3249	7.63528	0.31039	gray
Supercontig_12.3	2555144	2557918	1387.5	-0.3103	7.48707	0.00255686	peaks1_common	161.112	199.773		Supercontig_12.3	2555143	2557918	NCU00084		7.33192	7.64222	0.3103	gray
Supercontig_12.2	3978001	3979124	562	-0.31027	7.63375	0.00196992	peaks1_common	178.356	221.151		Supercontig_12.2	3978000	3979124	NCU08413		7.47861	7.78889	0.31027	gray
Supercontig_12.3	617686	622316	2315.5	-0.30985	7.65869	0.00182576	peaks1_common	181.492	224.974		Supercontig_12.3	617685	622316	NCU05718		7.50377	7.81361	0.30985	gray
Supercontig_12.6	1452524	1455504	1490.5	-0.30982	7.31596	0.00366884	peaks1_common	143.117	177.401		Supercontig_12.6	1452523	1455504	NCU05577		7.16105	7.47087	0.30982	gray
Supercontig_12.1	1485051	1487679	1314.5	-0.30967	7.33156	0.00372833	peaks1_common	144.68	179.32		Supercontig_12.1	1485050	1487679	NCU02066		7.17672	7.4864	0.30967	gray
Supercontig_12.2	4209457	4212864	1704	-0.30954	7.54174	0.00243179	peaks1_common	167.378	207.434		Supercontig_12.2	4209456	4212864	NCU09352		7.38697	7.69651	0.30954	gray
Supercontig_12.3	1857193	1862255	2531.5	-0.30944	7.35464	0.00342286	peaks1_common	147.025	182.198		Supercontig_12.3	1857192	1862255	NCU06196		7.19992	7.50936	0.30944	gray
Supercontig_12.2	3482151	3484553	1201.5	-0.30922	7.69532	0.00172414	peaks1_common	186.2	230.709		Supercontig_12.2	3482150	3484553	NCU08489		7.54071	7.84993	0.30922	gray
Supercontig_12.3	1487001	1490107	1553.5	-0.30921	7.37737	0.00314067	peaks1_common	149.372	185.076		Supercontig_12.3	1487000	1490107	NCU06461		7.22276	7.53198	0.30921	gray
Supercontig_12.3	3962127	3964706	1290	-0.30913	7.38486	0.00316768	peaks1_common	150.154	186.034		Supercontig_12.3	3962126	3964706	NCU00466		7.23029	7.53942	0.30913	gray
Supercontig_12.7	2943678	2946327	1325	-0.30905	7.39232	0.00319455	peaks1_common	150.936	186.994		Supercontig_12.7	2943677	2946327	NCU02318		7.23779	7.54685	0.30905	gray
Supercontig_12.1	9218646	9220358	856.5	-0.30897	7.39974	0.00322127	peaks1_common	151.719	187.953		Supercontig_12.1	9218645	9220358	NCU02780		7.24526	7.55422	0.30897	gray
Supercontig_12.6	3102539	3104168	815	-0.30871	7.98641	0.00101264	peaks1_common	227.868	282.237		Supercontig_12.6	3102538	3104168	NCU06009		7.83205	8.14077	0.30871	gray
Supercontig_12.7	3030629	3032749	1060.5	-0.30867	7.60086	0.00210643	peaks1_common	174.432	216.046		Supercontig_12.7	3030628	3032749	NCU02292		7.44652	7.75519	0.30867	gray
Supercontig_12.5	3130411	3134050	1820	-0.30865	7.42903	0.0029825	peaks1_common	154.848	191.786		Supercontig_12.5	3130410	3134050	NCU01174		7.27471	7.58336	0.30865	gray
Supercontig_12.1	6130028	6132072	1022.5	-0.3084	7.45062	0.00273738	peaks1_common	157.196	194.661		Supercontig_12.1	6130027	6132072	NCU07386		7.29642	7.60482	0.3084	gray
Supercontig_12.5	366038	368701	1332	-0.30816	7.47189	0.00280932	peaks1_common	159.544	197.536		Supercontig_12.5	366037	368701	NCU07769		7.31781	7.62597	0.30816	gray
Supercontig_12.7	1482981	1486172	1596	-0.30763	7.25862	0.00431902	peaks1_common	137.645	170.359		Supercontig_12.7	1482980	1486172	NCU10910		7.10481	7.41244	0.30763	gray
Supercontig_12.3	3195326	3197868	1271.5	-0.3071	7.33025	0.00372833	peaks1_common	144.678	178.998		Supercontig_12.3	3195325	3197868	NCU00257		7.1767	7.4838	0.3071	gray
Supercontig_12.3	4196898	4199108	1105.5	-0.30704	7.33799	0.00336585	peaks1_common	145.459	179.957		Supercontig_12.3	4196897	4199108	NCU09006		7.18447	7.49151	0.30704	gray
Supercontig_12.1	3568677	3576199	3761.5	-0.30697	7.56721	0.0025165	peaks1_common	170.511	210.941		Supercontig_12.1	3568676	3576199	NCU09367		7.41372	7.72069	0.30697	gray
Supercontig_12.6	3332004	3334639	1318	-0.30689	7.57378	0.00227316	peaks1_common	171.294	211.898		Supercontig_12.6	3332003	3334639	NCU05954		7.42034	7.72723	0.30689	gray
Supercontig_12.5	2416519	2418693	1087.5	-0.30678	7.36856	0.00347918	peaks1_common	148.588	183.795		Supercontig_12.5	2416518	2418693	NCU03788		7.21517	7.52195	0.30678	gray
Supercontig_12.1	4365085	4366606	761	-0.30671	7.58684	0.0023133	peaks1_common	172.863	213.811		Supercontig_12.1	4365084	4366606	NCU03057		7.43348	7.74019	0.30671	gray
Supercontig_12.4	3947496	3953161	2833	-0.30638	7.41322	0.0029316	peaks1_common	153.28	189.547		Supercontig_12.4	3947495	3953161	NCU08023		7.26003	7.56641	0.30638	gray
Supercontig_12.4	1420445	1423398	1477	-0.30593	7.64418	0.00221978	peaks1_common	179.92	222.42		Supercontig_12.4	1420444	1423398	NCU07896		7.49121	7.79714	0.30593	gray
Supercontig_12.3	2634913	2638616	1852	-0.30582	7.47071	0.00310752	peaks1_common	159.543	197.214		Supercontig_12.3	2634912	2638616	NCU00104		7.3178	7.62362	0.30582	gray
Supercontig_12.7	1313357	1314694	669	-0.30568	8.04828	0.000907332	peaks1_common	238.103	294.295		Supercontig_12.7	1313356	1314694	NCU10056		7.89544	8.20112	0.30568	gray
Supercontig_12.5	5298239	5300212	987	-0.30568	7.48473	0.00283308	peaks1_common	161.109	199.13		Supercontig_12.5	5298238	5300212	NCU04233		7.33189	7.63757	0.30568	gray
Supercontig_12.6	2135896	2136963	534	-0.30553	7.49861	0.00288028	peaks1_common	162.675	201.045		Supercontig_12.6	2135895	2136963	NCU04028		7.34585	7.65138	0.30553	gray
Supercontig_12.6	1445748	1448484	1368.5	-0.30507	7.2242	0.00466726	peaks1_common	134.519	166.195		Supercontig_12.6	1445747	1448484	NCU05579		7.07166	7.37673	0.30507	gray
Supercontig_12.4	4726332	4728819	1244	-0.30464	7.57923	0.00229326	peaks1_common	172.077	212.534		Supercontig_12.4	4726331	4728819	NCU06975		7.42691	7.73155	0.30464	gray
Supercontig_12.2	2807412	2810215	1402	-0.30427	7.36728	0.00384486	peaks1_common	148.585	183.472		Supercontig_12.2	2807411	2810215	NCU01651		7.21514	7.51941	0.30427	gray
Supercontig_12.1	2703893	2706847	1477.5	-0.30402	7.63057	0.00218222	peaks1_common	178.349	220.186		Supercontig_12.1	2703892	2706847	NCU02552		7.47856	7.78258	0.30402	gray
Supercontig_12.1	7519653	7523515	1931.5	-0.30384	7.42659	0.00330052	peaks1_common	154.844	191.143		Supercontig_12.1	7519652	7523515	NCU00696		7.27467	7.57851	0.30384	gray
Supercontig_12.1	4111149	4116658	2755	-0.30372	7.44104	0.00300776	peaks1_common	156.409	193.059		Supercontig_12.1	4111148	4116658	NCU09807		7.28918	7.5929	0.30372	gray
Supercontig_12.5	210262	212692	1215.5	-0.30371	7.65557	0.00202363	peaks1_common	181.486	224.011		Supercontig_12.5	210261	212692	NCU07810		7.50372	7.80742	0.30371	gray
Supercontig_12.4	4311049	4314145	1548.5	-0.30355	7.46245	0.00308277	peaks1_common	158.757	195.934		Supercontig_12.4	4311048	4314145	NCU07340		7.31068	7.61422	0.30355	gray
Supercontig_12.1	1615158	1618412	1627.5	-0.30312	7.51121	0.00262478	peaks1_common	164.239	202.639		Supercontig_12.1	1615157	1618412	NCU02033		7.35965	7.66277	0.30312	gray
Supercontig_12.1	9209219	9211958	1370	-0.30312	7.51121	0.00262478	peaks1_common	164.239	202.639		Supercontig_12.1	9209218	9211958	NCU02783		7.35965	7.66277	0.30312	gray
Supercontig_12.5	6297460	6298740	640.5	-0.30305	8.02288	0.000967323	peaks1_common	234.161	288.896		Supercontig_12.5	6297459	6298740	NCU17048		7.87136	8.17441	0.30305	gray
Supercontig_12.5	4519795	4524108	2157	-0.30286	7.53835	0.00269188	peaks1_common	167.373	206.469		Supercontig_12.5	4519794	4524108	NCU09537		7.38692	7.68978	0.30286	gray
Supercontig_12.7	1113591	1116588	1499	-0.30243	7.75146	0.001851	peaks1_common	194.045	239.3		Supercontig_12.7	1113590	1116588	NCU08393		7.60024	7.90268	0.30243	gray
Supercontig_12.3	4788658	4789684	513.5	-0.30239	11.1517	8.99505e-14	peaks1_common	2048.66	2526.38		Supercontig_12.3	4788657	4789684	NCU08254		11.0005	11.3029	0.30239	gray
Supercontig_12.3	2368758	2371313	1278	-0.30234	7.19747	0.00456399	peaks1_common	132.174	162.99		Supercontig_12.3	2368757	2371313	NCU00039		7.0463	7.34864	0.30234	gray
Supercontig_12.2	482886	485588	1351.5	-0.30212	7.28018	0.00396553	peaks1_common	139.984	172.594		Supercontig_12.2	482885	485588	NCU03495		7.12912	7.43124	0.30212	gray
Supercontig_12.6	907088	909181	1047	-0.30203	7.3041	0.00402785	peaks1_common	142.329	175.474		Supercontig_12.6	907087	909181	NCU04810		7.15309	7.45512	0.30203	gray
Supercontig_12.1	7654156	7656172	1008.5	-0.30197	7.31983	0.00408923	peaks1_common	143.892	177.394		Supercontig_12.1	7654155	7656172	NCU00660		7.16884	7.47082	0.30197	gray
Supercontig_12.1	8564483	8567450	1484	-0.30151	7.41075	0.00324784	peaks1_common	153.277	188.903		Supercontig_12.1	8564482	8567450	NCU02962		7.25999	7.56151	0.30151	gray
Supercontig_12.1	3537800	3540356	1278.5	-0.30024	7.58355	0.00255838	peaks1_common	172.856	212.847		Supercontig_12.1	3537799	3540356	NCU09373		7.43343	7.73367	0.30024	gray
Supercontig_12.7	2958380	2962416	2018.5	-0.29946	7.14396	0.00486263	peaks1_common	127.489	156.899		Supercontig_12.7	2958379	2962416	NCU02314		6.99423	7.29369	0.29946	gray
Supercontig_12.7	3257889	3261513	1812.5	-0.29938	7.31065	0.00405866	peaks1_common	143.108	176.111		Supercontig_12.7	3257888	3261513	NCU02230		7.16096	7.46034	0.29938	gray
Supercontig_12.3	3420640	3424076	1718.5	-0.29936	7.3185	0.00408923	peaks1_common	143.89	177.07		Supercontig_12.3	3420639	3424076	NCU00317		7.16882	7.46818	0.29936	gray
Supercontig_12.5	3888214	3892249	2018	-0.29935	7.32631	0.00411957	peaks1_common	144.671	178.031		Supercontig_12.5	3888213	3892249	NCU01394		7.17664	7.47598	0.29935	gray
Supercontig_12.5	2018796	2022326	1765.5	-0.2993	7.3418	0.00375776	peaks1_common	146.236	179.95		Supercontig_12.5	2018795	2022326	NCU03668		7.19215	7.49145	0.2993	gray
Supercontig_12.5	467279	469309	1015.5	-0.29921	7.37229	0.00347918	peaks1_common	149.364	183.788		Supercontig_12.5	467278	469309	NCU07742		7.22268	7.52189	0.29921	gray
Supercontig_12.1	7374184	7376676	1246.5	-0.29887	7.45295	0.00337841	peaks1_common	157.971	194.333		Supercontig_12.1	7374183	7376676	NCU00737		7.30352	7.60239	0.29887	gray
Supercontig_12.6	3864210	3868482	2136.5	-0.29872	7.48119	0.00313213	peaks1_common	161.102	198.164		Supercontig_12.6	3864209	3868482	NCU05064		7.33183	7.63055	0.29872	gray
Supercontig_12.3	5050985	5053003	1009.5	-0.29862	8.34962	0.000458416	peaks1_common	294.13	361.77		Supercontig_12.3	5050984	5053003	NCU08525		8.20031	8.49893	0.29862	gray
Supercontig_12.6	835119	840359	2620.5	-0.29861	7.50202	0.00288028	peaks1_common	163.451	201.038		Supercontig_12.6	835118	840359	NCU10733		7.35272	7.65132	0.29861	gray
Supercontig_12.1	9689585	9690543	479.5	-0.29853	10.6426	2.4509e-10	peaks1_common	1441.48	1772.86		Supercontig_12.1	9689584	9690543	NCU08639		10.4933	10.7919	0.29853	gray
Supercontig_12.6	1577165	1579782	1309	-0.29848	7.52255	0.00295024	peaks1_common	165.801	203.91		Supercontig_12.6	1577164	1579782	NCU05539		7.37331	7.67179	0.29848	gray
Supercontig_12.2	3820520	3822258	869.5	-0.29844	7.52933	0.00297333	peaks1_common	166.584	204.868		Supercontig_12.2	3820519	3822258	NCU08731		7.38011	7.67855	0.29844	gray
Supercontig_12.6	3907959	3909664	853	-0.29837	8.01564	0.00105964	peaks1_common	233.367	286.984		Supercontig_12.6	3907958	3909664	NCU05053		7.86646	8.16482	0.29837	gray
Supercontig_12.2	3360896	3362587	846	-0.29835	7.5428	0.00271405	peaks1_common	168.152	206.783		Supercontig_12.2	3360895	3362587	NCU10035		7.39362	7.69198	0.29835	gray
Supercontig_12.5	4827354	4830766	1706.5	-0.29835	7.5428	0.00271405	peaks1_common	168.152	206.783		Supercontig_12.5	4827353	4830766	NCU04101		7.39362	7.69198	0.29835	gray
Supercontig_12.3	3794914	3797318	1202.5	-0.29817	7.56936	0.0025165	peaks1_common	171.287	210.612		Supercontig_12.3	3794913	3797318	NCU00421		7.42027	7.71844	0.29817	gray
Supercontig_12.5	2806239	2808729	1245.5	-0.29817	7.56936	0.0025165	peaks1_common	171.287	210.612		Supercontig_12.5	2806238	2808729	NCU01065		7.42027	7.71844	0.29817	gray
Supercontig_12.6	1952770	1954720	975.5	-0.29774	7.62738	0.0024125	peaks1_common	178.343	219.222		Supercontig_12.6	1952769	1954720	NCU04080		7.47851	7.77625	0.29774	gray
Supercontig_12.6	4100025	4102194	1085	-0.29768	7.95566	0.00131849	peaks1_common	223.917	275.231		Supercontig_12.6	4100024	4102194	NCU05008		7.80682	8.1045	0.29768	gray
Supercontig_12.1	5511749	5512901	576.5	-0.29754	7.65244	0.00223848	peaks1_common	181.48	223.048		Supercontig_12.1	5511748	5512901	NCU08387		7.50367	7.80121	0.29754	gray
Supercontig_12.6	3980361	3982393	1016.5	-0.2974	8.1544	0.000798795	peaks1_common	257.013	315.851		Supercontig_12.6	3980360	3982393	NCU05034		8.0057	8.3031	0.2974	gray
Supercontig_12.7	3221570	3223833	1132	-0.29694	7.71918	0.0019771	peaks1_common	190.113	233.56		Supercontig_12.7	3221569	3223833	NCU02239		7.57071	7.86765	0.29694	gray
Supercontig_12.2	3532339	3538814	3238	-0.29668	7.37854	0.00387349	peaks1_common	150.144	184.424		Supercontig_12.2	3532338	3538814	NCU08473		7.2302	7.52688	0.29668	gray
Supercontig_12.4	1937013	1939566	1277	-0.29667	7.38603	0.00390191	peaks1_common	150.926	185.383		Supercontig_12.4	1937012	1939566	NCU09746		7.23769	7.53436	0.29667	gray
Supercontig_12.1	7279481	7283180	1850	-0.29664	7.40089	0.00356234	peaks1_common	152.49	187.3		Supercontig_12.1	7279480	7283180	NCU00759		7.25257	7.54921	0.29664	gray
Supercontig_12.3	3442679	3446003	1662.5	-0.29664	7.40089	0.00356234	peaks1_common	152.49	187.3		Supercontig_12.3	3442678	3446003	NCU00321		7.25257	7.54921	0.29664	gray
Supercontig_12.1	1353673	1357751	2039.5	-0.2966	7.4156	0.00361691	peaks1_common	154.055	189.217		Supercontig_12.1	1353672	1357751	NCU02091		7.2673	7.5639	0.2966	gray
Supercontig_12.1	7853272	7856250	1489.5	-0.2964	7.48001	0.00313213	peaks1_common	161.1	197.843		Supercontig_12.1	7853271	7856250	NCU00608		7.33181	7.62821	0.2964	gray
Supercontig_12.7	86449	88220	886	-0.2964	7.48001	0.00313213	peaks1_common	161.1	197.843		Supercontig_12.7	86448	88220	NCU09284		7.33181	7.62821	0.2964	gray
Supercontig_12.4	2254128	2256713	1293	-0.29637	7.48699	0.00315661	peaks1_common	161.883	198.8		Supercontig_12.4	2254127	2256713	NCU07682		7.33881	7.63518	0.29637	gray
Supercontig_12.5	2537598	2540167	1285	-0.29619	7.52819	0.00297333	peaks1_common	166.583	204.546		Supercontig_12.5	2537597	2540167	NCU03827		7.3801	7.67628	0.29619	gray
Supercontig_12.4	4966707	4970951	2122.5	-0.29615	7.06058	0.0056548	peaks1_common	120.468	147.918		Supercontig_12.4	4966706	4970951	NCU07029		6.9125	7.20865	0.29615	gray
Supercontig_12.6	1091764	1093868	1052.5	-0.29591	7.58135	0.0028235	peaks1_common	172.852	212.204		Supercontig_12.6	1091763	1093868	NCU09779		7.43339	7.7293	0.29591	gray
Supercontig_12.7	3158696	3161815	1560	-0.29572	7.61361	0.00264116	peaks1_common	176.772	216.988		Supercontig_12.7	3158695	3161815	NCU02257		7.46575	7.76147	0.29572	gray
Supercontig_12.3	458931	459470	270	-0.29572	10.3246	1.03909e-08	peaks1_common	1157.48	1420.8		Supercontig_12.3	458930	459470	NCU05678		10.1768	10.4725	0.29572	gray
Supercontig_12.3	1314200	1317300	1550.5	-0.29543	7.65759	0.00225712	peaks1_common	182.263	223.682		Supercontig_12.3	1314199	1317300	NCU06413		7.50987	7.8053	0.29543	gray
Supercontig_12.4	5928092	5930117	1013	-0.2954	11.0812	8.69486e-13	peaks1_common	1955.73	2400.12		Supercontig_12.4	5928091	5930117	NCU10070		10.9335	11.2289	0.2954	gray
Supercontig_12.2	3487822	3493366	2772.5	-0.29512	7.70027	0.00236773	peaks1_common	187.755	230.373		Supercontig_12.2	3487821	3493366	NCU08487		7.55271	7.84783	0.29512	gray
Supercontig_12.3	124320	126665	1173	-0.29453	7.77062	0.00189807	peaks1_common	197.178	241.836		Supercontig_12.3	124319	126665	NCU09497		7.62336	7.91788	0.29453	gray
Supercontig_12.2	2826560	2830695	2068	-0.29418	7.39964	0.00356234	peaks1_common	152.488	186.979		Supercontig_12.2	2826559	2830695	NCU01644		7.25255	7.54673	0.29418	gray
Supercontig_12.3	2093534	2096874	1670.5	-0.29417	7.40702	0.00358971	peaks1_common	153.27	187.937		Supercontig_12.3	2093533	2096874	NCU06257		7.25994	7.55411	0.29417	gray
Supercontig_12.2	945299	947949	1325.5	-0.29414	7.43618	0.00332664	peaks1_common	156.401	191.772		Supercontig_12.2	945298	947949	NCU03367		7.28911	7.58325	0.29414	gray
Supercontig_12.3	4182367	4185651	1642.5	-0.29413	7.44337	0.0033526	peaks1_common	157.183	192.73		Supercontig_12.3	4182366	4185651	NCU09001		7.2963	7.59044	0.29413	gray
Supercontig_12.4	3772911	3775201	1145.5	-0.29413	7.44337	0.0033526	peaks1_common	157.183	192.73		Supercontig_12.4	3772910	3775201	NCU07974		7.2963	7.59044	0.29413	gray
Supercontig_12.1	6689123	6694304	2591	-0.29402	7.49969	0.00318097	peaks1_common	163.447	200.395		Supercontig_12.1	6689122	6694304	NCU00929		7.35268	7.6467	0.29402	gray
Supercontig_12.2	3732840	3737893	2527	-0.29402	7.49969	0.00318097	peaks1_common	163.447	200.395		Supercontig_12.2	3732839	3737893	NCU08701		7.35268	7.6467	0.29402	gray
Supercontig_12.1	8629077	8631312	1118	-0.294	7.50658	0.00320519	peaks1_common	164.231	201.353		Supercontig_12.1	8629076	8631312	NCU02942		7.35958	7.65358	0.294	gray
Supercontig_12.1	7586379	7588881	1251.5	-0.29398	7.51343	0.00322928	peaks1_common	165.013	202.309		Supercontig_12.1	7586378	7588881	NCU00678		7.36644	7.66042	0.29398	gray
Supercontig_12.7	4031797	4033361	782.5	-0.29397	8.90752	8.87057e-05	peaks1_common	433.694	531.713		Supercontig_12.7	4031796	4033361	NCU05845		8.76054	9.0545	0.29397	gray
Supercontig_12.3	2952414	2955195	1391	-0.29394	7.52705	0.00327706	peaks1_common	166.581	204.226		Supercontig_12.3	2952413	2955195	NCU00195		7.38008	7.67402	0.29394	gray
Supercontig_12.6	2540593	2546168	2788	-0.29392	7.53381	0.00297333	peaks1_common	167.365	205.183		Supercontig_12.6	2540592	2546168	NCU03897		7.38685	7.68077	0.29392	gray
Supercontig_12.1	7056000	7058684	1342.5	-0.29363	7.60613	0.00262059	peaks1_common	175.986	215.709		Supercontig_12.1	7055999	7058684	NCU00821		7.45931	7.75294	0.29363	gray
Supercontig_12.3	1278334	1281333	1500	-0.29348	7.63785	0.00270237	peaks1_common	179.907	220.493		Supercontig_12.3	1278333	1281333	NCU06406		7.49111	7.78459	0.29348	gray
Supercontig_12.5	4849715	4856856	3571	-0.29344	7.64411	0.0027226	peaks1_common	180.692	221.449		Supercontig_12.5	4849714	4856856	NCU04105		7.49739	7.79083	0.29344	gray
Supercontig_12.1	4108777	4110357	790.5	-0.29237	7.80361	0.00197583	peaks1_common	201.89	247.245		Supercontig_12.1	4108776	4110357	NCU09806		7.65742	7.9498	0.29237	gray
Supercontig_12.1	1699141	1703074	1967	-0.29174	7.46355	0.0037764	peaks1_common	159.53	195.283		Supercontig_12.1	1699140	1703074	NCU02006		7.31768	7.60942	0.29174	gray
Supercontig_12.3	4313951	4315992	1021	-0.29173	7.48464	0.00348015	peaks1_common	161.879	198.158		Supercontig_12.3	4313950	4315992	NCU07571		7.33877	7.6305	0.29173	gray
Supercontig_12.1	6697989	6702605	2308.5	-0.29173	7.47764	0.00345494	peaks1_common	161.096	197.199		Supercontig_12.1	6697988	6702605	NCU00927		7.33177	7.6235	0.29173	gray
Supercontig_12.5	1516114	1520097	1992	-0.29173	7.47764	0.00345494	peaks1_common	161.096	197.199		Supercontig_12.5	1516113	1520097	NCU04609		7.33177	7.6235	0.29173	gray
Supercontig_12.5	1468357	1471689	1666.5	-0.29172	7.41313	0.00361691	peaks1_common	154.052	188.574		Supercontig_12.5	1468356	1471689	NCU04618		7.26727	7.55899	0.29172	gray
Supercontig_12.5	5737907	5740985	1539.5	-0.29172	7.41313	0.00361691	peaks1_common	154.052	188.574		Supercontig_12.5	5737906	5740985	NCU08928		7.26727	7.55899	0.29172	gray
Supercontig_12.1	6671629	6674526	1449	-0.29165	7.36087	0.00423861	peaks1_common	148.575	181.861		Supercontig_12.1	6671628	6674526	NCU00935		7.21505	7.50669	0.29165	gray
Supercontig_12.1	4469902	4471900	999.5	-0.29159	7.5726	0.0028018	peaks1_common	172.064	210.605		Supercontig_12.1	4469901	4471900	NCU03078		7.4268	7.71839	0.29159	gray
Supercontig_12.4	3518539	3523558	2510	-0.29157	7.33014	0.00411957	peaks1_common	145.448	178.024		Supercontig_12.4	3518538	3523558	NCU04390		7.18435	7.47593	0.29157	gray
Supercontig_12.5	407786	410279	1247	-0.29129	7.66169	0.00250997	peaks1_common	183.044	223.997		Supercontig_12.5	407785	410279	NCU07755		7.51605	7.80734	0.29129	gray
Supercontig_12.3	4780591	4781498	454	-0.29125	11.2517	9.35437e-14	peaks1_common	2204.25	2697.35		Supercontig_12.3	4780590	4781498	NCU08251		11.1061	11.3973	0.29125	gray
Supercontig_12.2	1858296	1859431	568	-0.29097	7.72802	0.00221698	peaks1_common	191.677	234.51		Supercontig_12.2	1858295	1859431	NCU06822		7.58254	7.87351	0.29097	gray
Supercontig_12.3	2091106	2093298	1096.5	-0.28942	7.53152	0.00297333	peaks1_common	167.36	204.539		Supercontig_12.3	2091105	2093298	NCU16646		7.38681	7.67623	0.28942	gray
Supercontig_12.7	3043584	3047063	1740	-0.28942	7.53152	0.00297333	peaks1_common	167.36	204.539		Supercontig_12.7	3043583	3047063	NCU10775		7.38681	7.67623	0.28942	gray
Supercontig_12.7	85892	89396	1752.5	-0.28942	7.54497	0.00332431	peaks1_common	168.927	206.454		Supercontig_12.7	85891	89396	NCU09283		7.40026	7.68968	0.28942	gray
Supercontig_12.2	1885631	1886028	199	-0.28941	7.55829	0.00304194	peaks1_common	170.495	208.369		Supercontig_12.2	1885630	1886028	NCU06808		7.41359	7.70299	0.28941	gray
Supercontig_12.6	3987088	3988608	760.5	-0.28941	7.55829	0.00304194	peaks1_common	170.495	208.369		Supercontig_12.6	3987087	3988608	NCU05032		7.41359	7.70299	0.28941	gray
Supercontig_12.2	1953766	1956330	1282.5	-0.28937	7.45525	0.00375025	peaks1_common	158.745	194.003		Supercontig_12.2	1953765	1956330	NCU06781		7.31056	7.59994	0.28937	gray
Supercontig_12.2	4067624	4072400	2388.5	-0.2893	7.4192	0.0040136	peaks1_common	154.831	189.211		Supercontig_12.2	4067623	4072400	NCU08439		7.27455	7.56385	0.2893	gray
Supercontig_12.3	1679815	1684035	2110.5	-0.2893	7.4192	0.0040136	peaks1_common	154.831	189.211		Supercontig_12.3	1679814	1684035	NCU06508		7.27455	7.56385	0.2893	gray
Supercontig_12.1	9053997	9057111	1557.5	-0.28926	7.40453	0.00395816	peaks1_common	153.267	187.294		Supercontig_12.1	9053996	9057111	NCU02808		7.2599	7.54916	0.28926	gray
Supercontig_12.2	2379105	2381977	1436.5	-0.28924	7.39713	0.00393014	peaks1_common	152.484	186.334		Supercontig_12.2	2379104	2381977	NCU01798		7.25251	7.54175	0.28924	gray
Supercontig_12.3	585588	588012	1212.5	-0.28877	7.77915	0.00212525	peaks1_common	198.744	242.785		Supercontig_12.3	585587	588012	NCU05708		7.63477	7.92354	0.28877	gray
Supercontig_12.7	3974860	3977118	1129.5	-0.28877	7.77915	0.00212525	peaks1_common	198.744	242.785		Supercontig_12.7	3974859	3977118	NCU05831		7.63477	7.92354	0.28877	gray
Supercontig_12.4	1792875	1795749	1437.5	-0.28873	7.28141	0.00486551	peaks1_common	140.755	171.942		Supercontig_12.4	1792874	1795749	NCU06608		7.13705	7.42577	0.28873	gray
Supercontig_12.5	6232861	6234598	869	-0.2887	10.9583	1.38996e-11	peaks1_common	1800.24	2199.06		Supercontig_12.5	6232860	6234598	NCU07210		10.814	11.1027	0.2887	gray
Supercontig_12.5	6422489	6423410	461	-0.28775	11.5618	4.48433e-16	peaks1_common	2736.21	3340.19		Supercontig_12.5	6422488	6423410	NCU07147		11.418	11.7057	0.28775	gray
Supercontig_12.4	98826	101049	1112	-0.28753	9.05497	5.74059e-05	peaks1_common	481.438	587.618		Supercontig_12.4	98825	101049	NCU09659		8.91121	9.19874	0.28753	gray
Supercontig_12.2	1376833	1380839	2003.5	-0.28722	7.59644	0.0028666	peaks1_common	175.196	213.79		Supercontig_12.2	1376832	1380839	NCU05343		7.45283	7.74005	0.28722	gray
Supercontig_12.1	7007299	7009671	1186.5	-0.28721	7.57037	0.0030871	peaks1_common	172.06	209.961		Supercontig_12.1	7007298	7009671	NCU00835		7.42676	7.71398	0.28721	gray
Supercontig_12.4	2115889	2119317	1714.5	-0.28721	7.57037	0.0030871	peaks1_common	172.06	209.961		Supercontig_12.4	2115888	2119317	NCU07711		7.42676	7.71398	0.28721	gray
Supercontig_12.1	2747997	2750111	1057.5	-0.28707	7.48227	0.00348015	peaks1_common	161.875	197.513		Supercontig_12.1	2747996	2750111	NCU02565		7.33873	7.6258	0.28707	gray
Supercontig_12.5	4866314	4869725	1706	-0.28707	7.48227	0.00348015	peaks1_common	161.875	197.513		Supercontig_12.5	4866313	4869725	NCU04108		7.33873	7.6258	0.28707	gray
Supercontig_12.5	6194674	6197388	1357.5	-0.28689	11.0323	6.38359e-12	peaks1_common	1896.2	2313.38		Supercontig_12.5	6194673	6197388	NCU07226		10.8889	11.1758	0.28689	gray
Supercontig_12.7	1169634	1171495	931	-0.28686	7.78387	0.00235372	peaks1_common	199.527	243.419		Supercontig_12.7	1169633	1171495	NCU09424		7.64044	7.9273	0.28686	gray
Supercontig_12.6	1555386	1559011	1813	-0.28686	7.41796	0.0040136	peaks1_common	154.829	188.888		Supercontig_12.6	1555385	1559011	NCU05546		7.27453	7.56139	0.28686	gray
Supercontig_12.1	858636	860920	1142.5	-0.28683	7.41064	0.00398598	peaks1_common	154.047	187.93		Supercontig_12.1	858635	860920	NCU09102		7.26722	7.55406	0.28683	gray
Supercontig_12.1	7471515	7474315	1400.5	-0.28683	7.41064	0.00398598	peaks1_common	154.047	187.93		Supercontig_12.1	7471514	7474315	NCU00711		7.26722	7.55406	0.28683	gray
Supercontig_12.2	3281841	3284759	1459.5	-0.28676	7.39587	0.00393014	peaks1_common	152.481	186.012		Supercontig_12.2	3281840	3284759	NCU01495		7.25249	7.53925	0.28676	gray
Supercontig_12.4	5437094	5438938	922.5	-0.28676	7.39587	0.00393014	peaks1_common	152.481	186.012		Supercontig_12.4	5437093	5438938	NCU05293		7.25249	7.53925	0.28676	gray
Supercontig_12.6	3247769	3249696	964	-0.28669	7.38096	0.00429675	peaks1_common	150.917	184.095		Supercontig_12.6	3247768	3249696	NCU05973		7.23761	7.5243	0.28669	gray
Supercontig_12.6	1209876	1213429	1777	-0.28638	7.3275	0.00454045	peaks1_common	145.443	177.379		Supercontig_12.6	1209875	1213429	NCU05648		7.18431	7.47069	0.28638	gray
Supercontig_12.3	575232	577383	1076	-0.28521	9.34898	1.92019e-05	peaks1_common	590.738	719.866		Supercontig_12.3	575231	577383	NCU05704		9.20637	9.49158	0.28521	gray
Supercontig_12.1	3638094	3640580	1243.5	-0.28508	7.60821	0.00319801	peaks1_common	176.763	215.381		Supercontig_12.1	3638093	3640580	NCU09360		7.46567	7.75075	0.28508	gray
Supercontig_12.1	6123268	6126724	1728.5	-0.28499	7.55604	0.00304194	peaks1_common	170.49	207.726		Supercontig_12.1	6123267	6126724	NCU07387		7.41355	7.69854	0.28499	gray
Supercontig_12.3	4657091	4658449	679.5	-0.28497	10.7353	3.82636e-10	peaks1_common	1544.34	1881.6		Supercontig_12.3	4657090	4658449	NCU10210		10.5928	10.8777	0.28497	gray
Supercontig_12.7	2755529	2758314	1393	-0.28494	7.53598	0.00330075	peaks1_common	168.139	204.854		Supercontig_12.7	2755528	2758314	NCU02358		7.39351	7.67845	0.28494	gray
Supercontig_12.3	1869911	1875534	2812	-0.28485	7.5088	0.00355484	peaks1_common	165.006	201.024		Supercontig_12.3	1869910	1875534	NCU06199		7.36638	7.65123	0.28485	gray
Supercontig_12.5	6052654	6053377	362	-0.28477	11.1026	2.92987e-12	peaks1_common	1992.25	2426.99		Supercontig_12.5	6052653	6053377	NCU09961		10.9602	11.245	0.28477	gray
Supercontig_12.5	2347647	2350415	1384.5	-0.28474	7.48109	0.00382816	peaks1_common	161.873	197.192		Supercontig_12.5	2347646	2350415	NCU03767		7.33872	7.62346	0.28474	gray
Supercontig_12.1	6881286	6884666	1690.5	-0.28471	7.47408	0.00380237	peaks1_common	161.09	196.235		Supercontig_12.1	6881285	6884666	NCU00880		7.33173	7.61643	0.28471	gray
Supercontig_12.4	1302757	1305569	1406.5	-0.28468	7.46703	0.0037764	peaks1_common	160.307	195.276		Supercontig_12.4	1302756	1305569	NCU07934		7.32469	7.60937	0.28468	gray
Supercontig_12.2	2349489	2352769	1640.5	-0.2845	7.43128	0.00404102	peaks1_common	156.393	190.485		Supercontig_12.2	2349488	2352769	NCU01810		7.28903	7.57353	0.2845	gray
Supercontig_12.7	1630415	1634765	2175.5	-0.28446	7.42402	0.00404102	peaks1_common	155.61	189.526		Supercontig_12.7	1630414	1634765	NCU06149		7.28179	7.56625	0.28446	gray
Supercontig_12.2	1922617	1925086	1235	-0.28402	7.357	0.00466119	peaks1_common	148.569	180.895		Supercontig_12.2	1922616	1925086	NCU06793		7.21499	7.49901	0.28402	gray
Supercontig_12.4	3300785	3304120	1668	-0.28371	7.31837	0.00499168	peaks1_common	144.659	176.097		Supercontig_12.4	3300784	3304120	NCU04455		7.17651	7.46022	0.28371	gray
Supercontig_12.1	3712525	3714202	839	-0.28349	8.07006	0.00140443	peaks1_common	243.591	296.483		Supercontig_12.1	3712524	3714202	NCU10059		7.92832	8.2118	0.28349	gray
Supercontig_12.3	3218739	3220987	1124.5	-0.28343	7.28671	0.00537947	peaks1_common	141.533	172.258		Supercontig_12.3	3218738	3220987	NCU00265		7.14499	7.42842	0.28343	gray
Supercontig_12.5	3819017	3822301	1642.5	-0.28343	7.28671	0.00537947	peaks1_common	141.533	172.258		Supercontig_12.5	3819016	3822301	NCU01378		7.14499	7.42842	0.28343	gray
Supercontig_12.5	1915800	1917436	818.5	-0.2831	7.70019	0.00288136	peaks1_common	188.529	229.403		Supercontig_12.5	1915799	1917436	NCU03639		7.55864	7.84174	0.2831	gray
Supercontig_12.3	4546066	4552231	3083	-0.2831	7.75906	0.00228578	peaks1_common	196.381	238.957		Supercontig_12.3	4546065	4552231	NCU07516		7.61751	7.90061	0.2831	gray
Supercontig_12.4	1331201	1333102	951	-0.283	7.62622	0.00295161	peaks1_common	179.112	217.93		Supercontig_12.4	1331200	1333102	NCU07925		7.48472	7.76772	0.283	gray
Supercontig_12.1	3319419	3320558	570	-0.28296	7.61352	0.00321984	peaks1_common	177.545	216.017		Supercontig_12.1	3319418	3320558	NCU02721		7.47204	7.755	0.28296	gray
Supercontig_12.7	929691	930085	197.5	-0.28294	10.5235	4.82779e-09	peaks1_common	1334.45	1623.59		Supercontig_12.7	929690	930085	NCU12036		10.382	10.665	0.28294	gray
Supercontig_12.2	4049733	4051420	844	-0.2829	7.87004	0.00193877	peaks1_common	212.098	258.047		Supercontig_12.2	4049732	4051420	NCU08433		7.72859	8.01149	0.2829	gray
Supercontig_12.3	427250	428547	649	-0.28287	10.5478	4.11187e-09	peaks1_common	1357.12	1651.09		Supercontig_12.3	427249	428547	NCU05670		10.4063	10.6892	0.28287	gray
Supercontig_12.1	5710066	5715076	2505.5	-0.28285	7.57471	0.00341723	peaks1_common	172.839	210.275		Supercontig_12.1	5710065	5715076	NCU11324		7.43328	7.71613	0.28285	gray
Supercontig_12.1	9370210	9371705	748	-0.28282	7.56815	0.0033942	peaks1_common	172.057	209.319		Supercontig_12.1	9370209	9371705	NCU09262		7.42674	7.70956	0.28282	gray
Supercontig_12.3	4289142	4291117	988	-0.28262	7.5213	0.00360388	peaks1_common	166.571	202.617		Supercontig_12.3	4289141	4291117	NCU07578		7.37999	7.66261	0.28262	gray
Supercontig_12.3	3131668	3138623	3478	-0.28236	7.47288	0.00380237	peaks1_common	161.087	195.912		Supercontig_12.3	3131667	3138623	NCU00239		7.3317	7.61406	0.28236	gray
Supercontig_12.5	1930747	1934109	1681.5	-0.28197	7.41548	0.0044103	peaks1_common	154.825	188.245		Supercontig_12.5	1930746	1934109	NCU03643		7.2745	7.55646	0.28197	gray
Supercontig_12.5	2385284	2387876	1296.5	-0.28191	7.40814	0.00438225	peaks1_common	154.043	187.285		Supercontig_12.5	2385283	2387876	NCU03779		7.26719	7.5491	0.28191	gray
Supercontig_12.1	8597012	8600523	1756	-0.28179	7.39335	0.00432548	peaks1_common	152.478	185.368		Supercontig_12.1	8597011	8600523	NCU02955		7.25246	7.53424	0.28179	gray
Supercontig_12.3	2949400	2952208	1404.5	-0.28173	7.3859	0.00474904	peaks1_common	151.696	184.409		Supercontig_12.3	2949399	2952208	NCU00194		7.24503	7.52677	0.28173	gray
Supercontig_12.1	4789775	4791981	1103.5	-0.28167	7.37841	0.00472001	peaks1_common	150.913	183.45		Supercontig_12.1	4789774	4791981	NCU03172		7.23757	7.51924	0.28167	gray
Supercontig_12.4	3321895	3324175	1140.5	-0.28154	7.36331	0.00423861	peaks1_common	149.349	181.532		Supercontig_12.4	3321894	3324175	NCU04449		7.22254	7.50408	0.28154	gray
Supercontig_12.5	882123	883776	827	-0.28117	7.7523	0.00251174	peaks1_common	195.594	237.681		Supercontig_12.5	882122	883776	NCU09670		7.61171	7.89289	0.28117	gray
Supercontig_12.1	7312111	7314029	959.5	-0.28069	7.58015	0.00344013	peaks1_common	173.622	210.912		Supercontig_12.1	7312110	7314029	NCU00753		7.4398	7.72049	0.28069	gray
Supercontig_12.1	1721690	1724492	1401.5	-0.28066	7.5736	0.00341723	peaks1_common	172.837	209.954		Supercontig_12.1	1721689	1724492	NCU01999		7.43327	7.71393	0.28066	gray
Supercontig_12.4	2665042	2667952	1455.5	-0.28051	7.54712	0.0036763	peaks1_common	169.703	206.125		Supercontig_12.4	2665041	2667952	NCU06391		7.40687	7.68737	0.28051	gray
Supercontig_12.7	807205	810730	1763	-0.28047	7.54042	0.00365231	peaks1_common	168.919	205.167		Supercontig_12.7	807204	810730	NCU06931		7.40018	7.68066	0.28047	gray
Supercontig_12.4	5385070	5387559	1245	-0.28026	7.50647	0.0039045	peaks1_common	165.002	200.381		Supercontig_12.4	5385069	5387559	NCU05307		7.36634	7.6466	0.28026	gray
Supercontig_12.4	5851070	5852551	741	-0.2802	11.0949	6.96952e-12	peaks1_common	1984.87	2410.36		Supercontig_12.4	5851069	5852551	NCU05178		10.9548	11.235	0.2802	gray
Supercontig_12.2	2937668	2940423	1378	-0.28011	7.4857	0.00385378	peaks1_common	162.652	197.506		Supercontig_12.2	2937667	2940423	NCU01623		7.34565	7.62576	0.28011	gray
Supercontig_12.1	7239594	7245038	2722.5	-0.28006	7.47871	0.00382816	peaks1_common	161.869	196.548		Supercontig_12.1	7239593	7245038	NCU00768		7.33868	7.61874	0.28006	gray
Supercontig_12.4	4190161	4191643	741.5	-0.27989	7.45754	0.00414872	peaks1_common	159.52	193.674		Supercontig_12.4	4190160	4191643	NCU08660		7.3176	7.59748	0.27989	gray
Supercontig_12.1	5865633	5867880	1124	-0.27978	7.44325	0.00409527	peaks1_common	157.954	191.758		Supercontig_12.1	5865632	5867880	NCU09213		7.30336	7.58314	0.27978	gray
Supercontig_12.4	2958674	2960394	860.5	-0.27907	7.36959	0.00469073	peaks1_common	150.129	182.168		Supercontig_12.4	2958673	2960394	NCU06310		7.23006	7.50913	0.27907	gray
Supercontig_12.3	4880842	4882114	636.5	-0.27901	8.74374	0.000248415	peaks1_common	389.164	472.197		Supercontig_12.3	4880841	4882114	NCU08568		8.60424	8.88325	0.27901	gray
Supercontig_12.2	1081550	1083991	1221	-0.279	7.67388	0.00280268	peaks1_common	185.385	224.937		Supercontig_12.2	1081549	1083991	NCU03331		7.53438	7.81338	0.279	gray
Supercontig_12.1	7826382	7831405	2512	-0.27892	7.6554	0.00303501	peaks1_common	183.03	222.068		Supercontig_12.1	7826381	7831405	NCU00614		7.51594	7.79486	0.27892	gray
Supercontig_12.5	6352180	6354748	1284.5	-0.27874	7.61773	0.00321984	peaks1_common	178.324	216.332		Supercontig_12.5	6352179	6354748	NCU07173		7.47836	7.7571	0.27874	gray
Supercontig_12.7	2836419	2838305	943.5	-0.2787	7.61135	0.00353039	peaks1_common	177.54	215.374		Supercontig_12.7	2836418	2838305	NCU02346		7.472	7.7507	0.2787	gray
Supercontig_12.5	5697544	5699666	1061.5	-0.27857	8.51808	0.000480267	peaks1_common	332.865	403.763		Supercontig_12.5	5697543	5699666	NCU10077		8.3788	8.65737	0.27857	gray
Supercontig_12.4	4729512	4743787	7138	-0.27855	7.58556	0.00313181	peaks1_common	174.403	211.547		Supercontig_12.4	4729511	4743787	NCU06976		7.44629	7.72484	0.27855	gray
Supercontig_12.1	5876414	5877989	788	-0.27846	7.57249	0.00341723	peaks1_common	172.836	209.633		Supercontig_12.1	5876413	5877989	NCU09214		7.43326	7.71172	0.27846	gray
Supercontig_12.6	3620207	3629942	4868	-0.27842	7.56591	0.0033942	peaks1_common	172.052	208.676		Supercontig_12.6	3620206	3629942	NCU05132		7.4267	7.70512	0.27842	gray
Supercontig_12.6	3393459	3395883	1212.5	-0.27837	7.5593	0.00337104	peaks1_common	171.268	207.718		Supercontig_12.6	3393458	3395883	NCU05937		7.42012	7.69848	0.27837	gray
Supercontig_12.5	4901323	4904760	1719	-0.27836	7.30784	0.00544264	peaks1_common	143.874	174.492		Supercontig_12.5	4901322	4904760	NCU04117		7.16866	7.44702	0.27836	gray
Supercontig_12.7	1935141	1937701	1280.5	-0.27828	7.54599	0.0036763	peaks1_common	169.701	205.804		Supercontig_12.7	1935140	1937701	NCU06063		7.40685	7.68513	0.27828	gray
Supercontig_12.7	1788290	1792684	2197.5	-0.27827	7.29993	0.00492918	peaks1_common	143.092	173.533		Supercontig_12.7	1788289	1792684	NCU06103		7.16079	7.43906	0.27827	gray
Supercontig_12.7	781608	783335	864	-0.27818	7.53255	0.00362817	peaks1_common	168.133	203.889		Supercontig_12.7	781607	783335	NCU17176		7.39346	7.67164	0.27818	gray
Supercontig_12.3	2154211	2156930	1360	-0.27765	7.47049	0.00417515	peaks1_common	161.084	195.268		Supercontig_12.3	2154210	2156930	NCU06273		7.33167	7.60931	0.27765	gray
Supercontig_12.4	3295276	3298392	1558.5	-0.27762	7.25154	0.00524918	peaks1_common	138.403	167.771		Supercontig_12.4	3295275	3298392	NCU04456		7.11273	7.39035	0.27762	gray
Supercontig_12.1	3502631	3504624	997	-0.27737	7.44203	0.00449309	peaks1_common	157.952	191.436		Supercontig_12.1	3502630	3504624	NCU09387		7.30335	7.58072	0.27737	gray
Supercontig_12.7	3059395	3063059	1832.5	-0.2773	7.43482	0.00446572	peaks1_common	157.169	190.477		Supercontig_12.7	3059394	3063059	NCU02284		7.29617	7.57347	0.2773	gray
Supercontig_12.3	127361	132582	2611	-0.27724	7.73282	0.00269944	peaks1_common	193.233	234.174		Supercontig_12.3	127360	132582	NCU09496		7.5942	7.87144	0.27724	gray
Supercontig_12.1	2441130	2443083	977	-0.27722	7.42758	0.00404102	peaks1_common	156.386	189.518		Supercontig_12.1	2441129	2443083	NCU02477		7.28897	7.56619	0.27722	gray
Supercontig_12.6	1531007	1534672	1833	-0.2769	7.39825	0.00435398	peaks1_common	153.256	185.683		Supercontig_12.6	1531006	1534672	NCU05555		7.2598	7.5367	0.2769	gray
Supercontig_12.1	5129010	5131962	1476.5	-0.27681	7.39082	0.00432548	peaks1_common	152.474	184.724		Supercontig_12.1	5129009	5131962	NCU03266		7.25241	7.52923	0.27681	gray
Supercontig_12.7	1913054	1917065	2006	-0.27681	7.39082	0.00432548	peaks1_common	152.474	184.724		Supercontig_12.7	1913053	1917065	NCU06068		7.25241	7.52923	0.27681	gray
Supercontig_12.1	4911213	4912670	729	-0.27669	7.62932	0.00326316	peaks1_common	179.89	217.922		Supercontig_12.1	4911212	4912670	NCU03209		7.49098	7.76766	0.27669	gray
Supercontig_12.7	3933874	3936133	1130	-0.27665	7.623	0.00324156	peaks1_common	179.107	216.966		Supercontig_12.7	3933873	3936133	NCU05820		7.48468	7.76132	0.27665	gray
Supercontig_12.3	4769937	4770464	264	-0.27625	10.8696	2.28491e-10	peaks1_common	1700.14	2058.94		Supercontig_12.3	4769936	4770464	NCU08246		10.7314	11.0077	0.27625	gray
Supercontig_12.2	1956500	1958790	1145.5	-0.2761	7.55153	0.0036763	peaks1_common	170.483	206.44		Supercontig_12.2	1956499	1958790	NCU06780		7.41348	7.68958	0.2761	gray
Supercontig_12.5	4776449	4779402	1477	-0.27586	7.52463	0.00360388	peaks1_common	167.347	202.61		Supercontig_12.5	4776448	4779402	NCU01430		7.3867	7.66256	0.27586	gray
Supercontig_12.4	3025834	3026397	282	-0.2752	8.67559	0.000343303	peaks1_common	371.699	449.816		Supercontig_12.4	3025833	3026397	NCU06287		8.53799	8.81319	0.2752	gray
Supercontig_12.3	3114419	3118284	1933	-0.27512	7.26647	0.00582935	peaks1_common	139.964	169.369		Supercontig_12.3	3114418	3118284	NCU11176		7.12891	7.40403	0.27512	gray
Supercontig_12.7	3139434	3141963	1265	-0.27505	7.44798	0.00452025	peaks1_common	158.733	192.072		Supercontig_12.7	3139433	3141963	NCU02263		7.31046	7.5855	0.27505	gray
Supercontig_12.2	2820783	2824240	1729	-0.27488	7.43359	0.00446572	peaks1_common	157.167	190.155		Supercontig_12.2	2820782	2824240	NCU01646		7.29615	7.57103	0.27488	gray
Supercontig_12.1	7032938	7035436	1249.5	-0.27486	7.25014	0.00576381	peaks1_common	138.401	167.448		Supercontig_12.1	7032937	7035436	NCU00829		7.11271	7.38757	0.27486	gray
Supercontig_12.1	5001646	5005327	1841	-0.27482	7.65949	0.00334841	peaks1_common	183.811	222.383		Supercontig_12.1	5001645	5005327	NCU03235		7.52208	7.7969	0.27482	gray
Supercontig_12.3	245253	247405	1076.5	-0.27481	11.0256	3.68313e-11	peaks1_common	1895.27	2292.96		Supercontig_12.3	245252	247405	NCU09172		10.8882	11.163	0.27481	gray
Supercontig_12.2	1961799	1963501	851.5	-0.27478	7.6533	0.00332727	peaks1_common	183.027	221.427		Supercontig_12.2	1961798	1963501	NCU06778		7.51591	7.79069	0.27478	gray
Supercontig_12.7	1207049	1208238	595	-0.2747	7.41906	0.00486263	peaks1_common	155.601	188.237		Supercontig_12.7	1207048	1208238	NCU09409		7.28171	7.55641	0.2747	gray
Supercontig_12.5	2766021	2767593	786.5	-0.27451	7.40438	0.00480634	peaks1_common	154.036	186.32		Supercontig_12.5	2766020	2767593	NCU01049		7.26712	7.54164	0.27451	gray
Supercontig_12.7	2506768	2509329	1281	-0.27442	7.60918	0.00353039	peaks1_common	177.536	214.732		Supercontig_12.7	2506767	2509329	NCU02433		7.47197	7.74639	0.27442	gray
Supercontig_12.4	5586040	5588851	1406	-0.27421	7.38208	0.00520133	peaks1_common	151.689	183.443		Supercontig_12.4	5586039	5588851	NCU05255		7.24498	7.51918	0.27421	gray
Supercontig_12.3	2536487	2538432	973	-0.27419	7.58335	0.00344013	peaks1_common	174.4	210.904		Supercontig_12.3	2536486	2538432	NCU00079		7.44625	7.72044	0.27419	gray
Supercontig_12.2	2961574	2965753	2090	-0.27411	7.37457	0.00517223	peaks1_common	150.907	182.484		Supercontig_12.2	2961573	2965753	NCU01611		7.23751	7.51162	0.27411	gray
Supercontig_12.2	3072629	3076914	2143	-0.27411	7.37457	0.00517223	peaks1_common	150.907	182.484		Supercontig_12.2	3072628	3076914	NCU01564		7.23751	7.51162	0.27411	gray
Supercontig_12.7	1387240	1390561	1661	-0.27407	7.57026	0.00374735	peaks1_common	172.832	208.991		Supercontig_12.7	1387239	1390561	NCU09711		7.43322	7.7073	0.27407	gray
Supercontig_12.2	3473541	3474541	500.5	-0.274	7.56366	0.00372382	peaks1_common	172.047	208.032		Supercontig_12.2	3473540	3474541	NCU08494		7.42666	7.70066	0.274	gray
Supercontig_12.5	4224444	4227989	1773	-0.2738	7.54371	0.00402829	peaks1_common	169.696	205.161		Supercontig_12.5	4224443	4227989	NCU06676		7.40681	7.68061	0.2738	gray
Supercontig_12.3	4726809	4727471	331.5	-0.27374	10.4155	3.35782e-08	peaks1_common	1242.17	1501.71		Supercontig_12.3	4726808	4727471	NCU08233		10.2787	10.5524	0.27374	gray
Supercontig_12.4	5743894	5747538	1822.5	-0.27373	7.537	0.00400387	peaks1_common	168.913	204.204		Supercontig_12.4	5743893	5747538	NCU05208		7.40014	7.67386	0.27373	gray
Supercontig_12.3	5272185	5273718	767	-0.27358	12.0572	1.02582e-19	peaks1_common	3876.13	4685.48		Supercontig_12.3	5272184	5273718	NCU16718		11.9204	12.194	0.27358	gray
Supercontig_12.3	3399873	3404312	2220	-0.27318	7.48911	0.00422742	peaks1_common	163.429	197.499		Supercontig_12.3	3399872	3404312	NCU00311		7.35252	7.6257	0.27318	gray
Supercontig_12.1	6134820	6137329	1255	-0.2731	7.7011	0.00288136	peaks1_common	189.303	228.754		Supercontig_12.1	6134819	6137329	NCU07384		7.56455	7.83765	0.2731	gray
Supercontig_12.2	204112	208178	2033.5	-0.27292	7.46809	0.00417515	peaks1_common	161.08	194.625		Supercontig_12.2	204111	208178	NCU03567		7.33163	7.60455	0.27292	gray
Supercontig_12.2	154839	156015	588.5	-0.27262	8.10595	0.00147724	peaks1_common	250.669	302.808		Supercontig_12.2	154838	156015	NCU03579		7.96964	8.24226	0.27262	gray
Supercontig_12.5	6246019	6247443	712.5	-0.27261	8.00742	0.00172164	peaks1_common	234.122	282.817		Supercontig_12.5	6246018	6247443	NCU11348		7.87111	8.14372	0.27261	gray
Supercontig_12.3	4316482	4319891	1705	-0.27235	7.42511	0.00443812	peaks1_common	156.382	188.875		Supercontig_12.3	4316481	4319891	NCU15832		7.28893	7.56128	0.27235	gray
Supercontig_12.1	9542855	9545945	1545.5	-0.27208	7.58874	0.00346289	peaks1_common	175.181	211.539		Supercontig_12.1	9542854	9545945	NCU08599		7.4527	7.72478	0.27208	gray
Supercontig_12.1	6530972	6533216	1122.5	-0.27194	7.5757	0.00377074	peaks1_common	173.613	209.625		Supercontig_12.1	6530971	6533216	NCU00975		7.43973	7.71167	0.27194	gray
Supercontig_12.1	5219437	5221304	934	-0.27186	7.56914	0.00374735	peaks1_common	172.83	208.669		Supercontig_12.1	5219436	5221304	NCU03296		7.43321	7.70507	0.27186	gray
Supercontig_12.7	1080398	1091850	5726.5	-0.27186	7.56914	0.00374735	peaks1_common	172.83	208.669		Supercontig_12.7	1080397	1091850	NCU08399		7.43321	7.70507	0.27186	gray
Supercontig_12.3	412993	413936	472	-0.27171	9.92003	1.80548e-06	peaks1_common	881.719	1064.44		Supercontig_12.3	412992	413936	NCU10605		9.78418	10.0559	0.27171	gray
Supercontig_12.7	1359470	1361717	1124	-0.27163	7.54926	0.0036763	peaks1_common	170.478	205.797		Supercontig_12.7	1359469	1361717	NCU09722		7.41344	7.68507	0.27163	gray
Supercontig_12.5	2321835	2326042	2104	-0.27155	7.54257	0.00402829	peaks1_common	169.694	204.839		Supercontig_12.5	2321834	2326042	NCU03758		7.40679	7.67834	0.27155	gray
Supercontig_12.1	1203257	1207192	1968	-0.27121	7.35049	0.00559498	peaks1_common	148.558	179.283		Supercontig_12.1	1203256	1207192	NCU02115		7.21489	7.48609	0.27121	gray
Supercontig_12.1	6815517	6819124	1804	-0.27095	7.49487	0.00425326	peaks1_common	164.21	198.136		Supercontig_12.1	6815516	6819124	NCU00902		7.3594	7.63034	0.27095	gray
Supercontig_12.1	3125823	3129123	1650.5	-0.27085	7.48792	0.00422742	peaks1_common	163.426	197.177		Supercontig_12.1	3125822	3129123	NCU02666		7.3525	7.62334	0.27085	gray
Supercontig_12.3	3567046	3570664	1809.5	-0.27085	7.48792	0.00422742	peaks1_common	163.426	197.177		Supercontig_12.3	3567045	3570664	NCU00357		7.3525	7.62334	0.27085	gray
Supercontig_12.4	2450843	2453095	1126.5	-0.27085	7.48792	0.00422742	peaks1_common	163.426	197.177		Supercontig_12.4	2450842	2453095	NCU08310		7.3525	7.62334	0.27085	gray
Supercontig_12.1	2368589	2371762	1587	-0.27035	7.45269	0.00497227	peaks1_common	159.511	192.387		Supercontig_12.1	2368588	2371762	NCU09980		7.31752	7.58787	0.27035	gray
Supercontig_12.5	413692	416603	1456	-0.26997	7.27987	0.00589343	peaks1_common	141.522	170.645		Supercontig_12.5	413691	416603	NCU07753		7.14488	7.41486	0.26997	gray
Supercontig_12.1	3392278	3396765	2244	-0.26979	7.41657	0.00486263	peaks1_common	155.597	187.593		Supercontig_12.1	3392277	3396765	NCU02742		7.28167	7.55147	0.26979	gray
Supercontig_12.1	4100771	4104175	1702.5	-0.26978	7.77519	0.00282755	peaks1_common	199.508	240.531		Supercontig_12.1	4100770	4104175	NCU09804		7.6403	7.91008	0.26978	gray
Supercontig_12.3	4802863	4804759	948.5	-0.26974	10.7411	2.27806e-09	peaks1_common	1558.81	1879.29		Supercontig_12.3	4802862	4804759	NCU08259		10.6062	10.876	0.26974	gray
Supercontig_12.4	4667957	4669687	865.5	-0.26974	7.57459	0.00412424	peaks1_common	173.612	209.305		Supercontig_12.4	4667956	4669687	NCU06960		7.43972	7.70946	0.26974	gray
Supercontig_12.5	5168281	5170309	1014.5	-0.26967	7.40923	0.00483461	peaks1_common	154.814	186.634		Supercontig_12.5	5168280	5170309	NCU04196		7.2744	7.54407	0.26967	gray
Supercontig_12.1	4753331	4755171	920.5	-0.26948	7.55478	0.00405253	peaks1_common	171.259	206.432		Supercontig_12.1	4753330	4755171	NCU03159		7.42004	7.68952	0.26948	gray
Supercontig_12.5	2454253	2456509	1128.5	-0.26948	7.55478	0.00405253	peaks1_common	171.259	206.432		Supercontig_12.5	2454252	2456509	NCU03799		7.42004	7.68952	0.26948	gray
Supercontig_12.2	3718787	3722533	1873.5	-0.26931	7.99111	0.00203375	peaks1_common	231.755	279.318		Supercontig_12.2	3718786	3722533	NCU08697		7.85645	8.12576	0.26931	gray
Supercontig_12.6	898370	902518	2074.5	-0.2693	7.38701	0.00474904	peaks1_common	152.468	183.758		Supercontig_12.6	898369	902518	NCU04808		7.25236	7.52166	0.2693	gray
Supercontig_12.5	5244451	5246447	998.5	-0.2692	7.71104	0.00319697	peaks1_common	190.869	230.024		Supercontig_12.5	5244450	5246447	NCU04218		7.57644	7.84564	0.2692	gray
Supercontig_12.6	2289206	2294780	2787.5	-0.26912	7.52795	0.00397929	peaks1_common	168.125	202.603		Supercontig_12.6	2289205	2294780	NCU03986		7.39339	7.66251	0.26912	gray
Supercontig_12.5	3200862	3203095	1117	-0.26862	7.49369	0.00425326	peaks1_common	164.208	197.814		Supercontig_12.5	3200861	3203095	NCU01195		7.35938	7.628	0.26862	gray
Supercontig_12.7	5593	6962	685	-0.26824	10.5455	1.84393e-08	peaks1_common	1361.87	1640.15		Supercontig_12.7	5592	6962	NCU09305		10.4114	10.6796	0.26824	gray
Supercontig_12.2	3556059	3560450	2196	-0.26807	7.45859	0.00454718	peaks1_common	160.292	193.022		Supercontig_12.2	3556058	3560450	NCU08468		7.32456	7.59262	0.26807	gray
Supercontig_12.7	791450	794570	1560.5	-0.26807	7.45859	0.00454718	peaks1_common	160.292	193.022		Supercontig_12.7	791449	794570	NCU06928		7.32456	7.59262	0.26807	gray
Supercontig_12.3	2808302	2811222	1460.5	-0.26783	7.44431	0.00494523	peaks1_common	158.726	191.105		Supercontig_12.3	2808301	2811222	NCU00154		7.3104	7.57823	0.26783	gray
Supercontig_12.3	281000	282805	903	-0.26723	11.2842	2.7951e-12	peaks1_common	2273.32	2735.93		Supercontig_12.3	280999	282805	NCU09184		11.1506	11.4178	0.26723	gray
Supercontig_12.4	4472390	4474962	1286.5	-0.26705	7.54028	0.00440426	peaks1_common	169.69	204.195		Supercontig_12.4	4472389	4474962	NCU07300		7.40676	7.67381	0.26705	gray
Supercontig_12.5	2398425	2403606	2591	-0.26705	7.54028	0.00440426	peaks1_common	169.69	204.195		Supercontig_12.5	2398424	2403606	NCU03784		7.40676	7.67381	0.26705	gray
Supercontig_12.1	8515900	8519829	1965	-0.26695	7.53355	0.00437957	peaks1_common	168.906	203.238		Supercontig_12.1	8515899	8519829	NCU02979		7.40007	7.66703	0.26695	gray
Supercontig_12.1	6594170	6596237	1034	-0.26693	7.39319	0.00523015	peaks1_common	153.248	184.395		Supercontig_12.1	6594169	6596237	NCU00953		7.25973	7.52666	0.26693	gray
Supercontig_12.4	1795847	1797909	1031.5	-0.26693	7.39319	0.00523015	peaks1_common	153.248	184.395		Supercontig_12.4	1795846	1797909	NCU06609		7.25973	7.52666	0.26693	gray
Supercontig_12.6	1837771	1843029	2629.5	-0.26693	7.39319	0.00523015	peaks1_common	153.248	184.395		Supercontig_12.6	1837770	1843029	NCU09869		7.25973	7.52666	0.26693	gray
Supercontig_12.7	1513648	1515397	875	-0.26645	7.64907	0.00364023	peaks1_common	183.018	220.143		Supercontig_12.7	1513647	1515397	NCU04539		7.51584	7.78229	0.26645	gray
Supercontig_12.7	923740	924601	431	-0.26637	11.1482	2.27804e-11	peaks1_common	2069.44	2489.08		Supercontig_12.7	923739	924601	NCU12039		11.015	11.2814	0.26637	gray
Supercontig_12.3	1286025	1290248	2112	-0.26636	7.36314	0.00514285	peaks1_common	150.119	180.558		Supercontig_12.3	1286024	1290248	NCU10397		7.22996	7.49632	0.26636	gray
Supercontig_12.6	1973629	1976050	1211	-0.26629	7.4925	0.00465273	peaks1_common	164.205	197.491		Supercontig_12.6	1973628	1976050	NCU04075		7.35936	7.62564	0.26629	gray
Supercontig_12.3	1851480	1853337	929	-0.26617	7.48555	0.00422742	peaks1_common	163.423	196.534		Supercontig_12.3	1851479	1853337	NCU06193		7.35247	7.61864	0.26617	gray
Supercontig_12.4	1953258	1956585	1664	-0.26617	7.48555	0.00422742	peaks1_common	163.423	196.534		Supercontig_12.4	1953257	1956585	NCU09741		7.35247	7.61864	0.26617	gray
Supercontig_12.4	1576641	1580898	2129	-0.26605	7.47856	0.00462667	peaks1_common	162.64	195.576		Supercontig_12.4	1576640	1580898	NCU06540		7.34554	7.61159	0.26605	gray
Supercontig_12.1	3298324	3300889	1283	-0.26601	7.6176	0.0038854	peaks1_common	179.097	215.36		Supercontig_12.1	3298323	3300889	NCU02716		7.4846	7.75061	0.26601	gray
Supercontig_12.1	815349	818956	1804	-0.26568	7.45738	0.00454718	peaks1_common	160.29	192.701		Supercontig_12.1	815348	818956	NCU09087		7.32454	7.59022	0.26568	gray
Supercontig_12.1	2594678	2597336	1329.5	-0.26568	7.45738	0.00454718	peaks1_common	160.29	192.701		Supercontig_12.1	2594677	2597336	NCU02519		7.32454	7.59022	0.26568	gray
Supercontig_12.2	3954216	3955217	501	-0.26565	7.93431	0.00229167	peaks1_common	223.09	268.194		Supercontig_12.2	3954215	3955217	NCU08406		7.80149	8.06713	0.26565	gray
Supercontig_12.5	2528740	2531593	1427	-0.26542	7.19566	0.00676224	peaks1_common	133.709	160.716		Supercontig_12.5	2528739	2531593	NCU03823		7.06295	7.32837	0.26542	gray
Supercontig_12.5	3000439	3005417	2489.5	-0.26542	7.44309	0.00494523	peaks1_common	158.724	190.784		Supercontig_12.5	3000438	3005417	NCU01140		7.31038	7.5758	0.26542	gray
Supercontig_12.3	3377942	3380737	1398	-0.26529	7.43589	0.00491794	peaks1_common	157.941	189.826		Supercontig_12.3	3377941	3380737	NCU00306		7.30325	7.56854	0.26529	gray
Supercontig_12.5	5781014	5782216	601.5	-0.26523	7.56577	0.00410051	peaks1_common	172.823	207.704		Supercontig_12.5	5781013	5782216	NCU08943		7.43316	7.69838	0.26523	gray
Supercontig_12.2	2524294	2527522	1614.5	-0.26496	7.69097	0.00345236	peaks1_common	188.509	226.513		Supercontig_12.2	2524293	2527522	NCU01760		7.55849	7.82345	0.26496	gray
Supercontig_12.4	2698362	2701150	1394.5	-0.2648	7.53914	0.00440426	peaks1_common	169.688	203.875		Supercontig_12.4	2698361	2701150	NCU16793		7.40674	7.67154	0.2648	gray
Supercontig_12.2	949013	952399	1693.5	-0.26445	7.51884	0.00432962	peaks1_common	167.337	201.002		Supercontig_12.2	949012	952399	NCU03366		7.38661	7.65106	0.26445	gray
Supercontig_12.4	2264627	2269100	2237	-0.26421	7.50514	0.00470422	peaks1_common	165.77	199.086		Supercontig_12.4	2264626	2269100	NCU07679		7.37304	7.63724	0.26421	gray
Supercontig_12.7	2569513	2572902	1695	-0.26417	7.63549	0.00359669	peaks1_common	181.447	217.908		Supercontig_12.7	2569512	2572902	NCU02415		7.50341	7.76758	0.26417	gray
Supercontig_12.4	141914	142889	488	-0.2641	11.1612	2.70765e-11	peaks1_common	2089.79	2509.6		Supercontig_12.4	141913	142889	NCU07581		11.0291	11.2932	0.2641	gray
Supercontig_12.1	937786	943577	2896	-0.26408	7.49825	0.00467858	peaks1_common	164.987	198.128		Supercontig_12.1	937785	943577	NCU02184		7.36621	7.63029	0.26408	gray
Supercontig_12.1	4581902	4583794	946.5	-0.26407	7.62919	0.00393022	peaks1_common	180.663	216.951		Supercontig_12.1	4581901	4583794	NCU03106		7.49716	7.76123	0.26407	gray
Supercontig_12.1	4493438	4495202	882.5	-0.26398	7.62286	0.00390788	peaks1_common	179.877	215.994		Supercontig_12.1	4493437	4495202	NCU03085		7.49087	7.75485	0.26398	gray
Supercontig_12.2	2003927	2005200	637	-0.26396	7.49132	0.00465273	peaks1_common	164.203	197.171		Supercontig_12.2	2003926	2005200	NCU06768		7.35934	7.6233	0.26396	gray
Supercontig_12.2	3159768	3162945	1589	-0.26396	7.49132	0.00465273	peaks1_common	164.203	197.171		Supercontig_12.2	3159767	3162945	NCU01534		7.35934	7.6233	0.26396	gray
Supercontig_12.4	3885570	3888635	1533	-0.26396	7.36942	0.00565373	peaks1_common	150.899	181.195		Supercontig_12.4	3885569	3888635	NCU08003		7.23744	7.5014	0.26396	gray
Supercontig_12.7	2822821	2826123	1651.5	-0.26396	7.36942	0.00565373	peaks1_common	150.899	181.195		Supercontig_12.7	2822820	2826123	NCU02348		7.23744	7.5014	0.26396	gray
Supercontig_12.7	3333896	3336315	1210	-0.26396	7.36942	0.00565373	peaks1_common	150.899	181.195		Supercontig_12.7	3333895	3336315	NCU02207		7.23744	7.5014	0.26396	gray
Supercontig_12.2	3744413	3748512	2050	-0.26388	7.61651	0.0038854	peaks1_common	179.094	215.038		Supercontig_12.2	3744412	3748512	NCU08705		7.48457	7.74845	0.26388	gray
Supercontig_12.2	1039711	1042645	1467.5	-0.26383	7.48436	0.00462667	peaks1_common	163.42	196.213		Supercontig_12.2	1039710	1042645	NCU03341		7.35244	7.61627	0.26383	gray
Supercontig_12.3	2311586	2315645	2030	-0.2638	7.36184	0.0056245	peaks1_common	150.117	180.236		Supercontig_12.3	2311585	2315645	NCU00019		7.22994	7.49374	0.2638	gray
Supercontig_12.5	6331673	6333871	1099.5	-0.26368	7.74341	0.00329488	peaks1_common	195.574	234.794		Supercontig_12.5	6331672	6333871	NCU10166		7.61157	7.87525	0.26368	gray
Supercontig_12.1	6227223	6229280	1029	-0.26335	7.58431	0.00414781	peaks1_common	175.173	210.253		Supercontig_12.1	6227222	6229280	NCU07360		7.45263	7.71598	0.26335	gray
Supercontig_12.5	5033352	5035745	1197	-0.26324	7.57778	0.00412424	peaks1_common	174.388	209.296		Supercontig_12.5	5033351	5035745	NCU04160		7.44616	7.7094	0.26324	gray
Supercontig_12.3	269062	271142	1040.5	-0.26321	11.0828	9.01652e-11	peaks1_common	1979.81	2376.06		Supercontig_12.3	269061	271142	NCU09178		10.9511	11.2144	0.26321	gray
Supercontig_12.1	4216631	4218403	886.5	-0.26315	7.44903	0.0054243	peaks1_common	159.505	191.421		Supercontig_12.1	4216630	4218403	NCU09328		7.31746	7.5806	0.26315	gray
Supercontig_12.5	5327537	5332820	2642	-0.26315	7.44903	0.0054243	peaks1_common	159.505	191.421		Supercontig_12.5	5327536	5332820	NCU04242		7.31746	7.5806	0.26315	gray
Supercontig_12.3	1605887	1607886	1000	-0.263	7.44186	0.00539736	peaks1_common	158.722	190.462		Supercontig_12.3	1605886	1607886	NCU06489		7.31036	7.57336	0.263	gray
Supercontig_12.1	4694770	4697885	1558	-0.26293	7.68994	0.00376772	peaks1_common	188.507	226.192		Supercontig_12.1	4694769	4697885	NCU03139		7.55847	7.8214	0.26293	gray
Supercontig_12.2	215249	218230	1491	-0.2629	7.55802	0.00445307	peaks1_common	172.036	206.424		Supercontig_12.2	215248	218230	NCU03563		7.42657	7.68947	0.2629	gray
Supercontig_12.4	3216598	3219011	1207	-0.26286	7.43465	0.00491794	peaks1_common	157.939	189.503		Supercontig_12.4	3216597	3219011	NCU04481		7.30322	7.56608	0.26286	gray
Supercontig_12.5	92097	94077	990.5	-0.26278	7.31551	0.00598691	peaks1_common	145.424	174.478		Supercontig_12.5	92096	94077	NCU08862		7.18412	7.4469	0.26278	gray
Supercontig_12.1	7670778	7673073	1148	-0.26265	7.67167	0.00370456	peaks1_common	186.153	223.324		Supercontig_12.1	7670777	7673073	NCU00657		7.54034	7.803	0.26265	gray
Supercontig_12.4	1983143	1985300	1079	-0.26259	7.30764	0.00598691	peaks1_common	144.642	173.517		Supercontig_12.4	1983142	1985300	NCU09734		7.17635	7.43894	0.26259	gray
Supercontig_12.2	4020737	4021831	547.5	-0.26226	7.64694	0.00397445	peaks1_common	183.014	219.499		Supercontig_12.2	4020736	4021831	NCU10246		7.51581	7.77807	0.26226	gray
Supercontig_12.5	5281786	5283163	689	-0.26203	7.51084	0.00472964	peaks1_common	166.552	199.723		Supercontig_12.5	5281785	5283163	NCU04228		7.37982	7.64186	0.26203	gray
Supercontig_12.5	1821054	1822996	971.5	-0.26195	7.62811	0.00393022	peaks1_common	180.66	216.629		Supercontig_12.5	1821053	1822996	NCU03605		7.49713	7.75908	0.26195	gray
Supercontig_12.6	1224246	1226344	1049.5	-0.26189	7.50397	0.00470422	peaks1_common	165.768	198.764		Supercontig_12.6	1224245	1226344	NCU05643		7.37303	7.63491	0.26189	gray
Supercontig_12.6	1361435	1364705	1635.5	-0.26176	7.38317	0.00520133	peaks1_common	152.46	182.791		Supercontig_12.6	1361434	1364705	NCU05603		7.25229	7.51405	0.26176	gray
Supercontig_12.1	9117558	9151762	17102.5	-0.26143	7.25951	0.00637644	peaks1_common	139.953	167.757		Supercontig_12.1	9117557	9151762	NCU02793		7.12879	7.39023	0.26143	gray
Supercontig_12.7	3950890	3954129	1620	-0.26137	7.71888	0.00321676	peaks1_common	192.431	230.651		Supercontig_12.7	3950889	3954129	NCU05826		7.5882	7.84956	0.26137	gray
Supercontig_12.1	626352	629587	1618	-0.26124	7.36054	0.0056245	peaks1_common	150.115	179.914		Supercontig_12.1	626351	629587	NCU07438		7.22992	7.49116	0.26124	gray
Supercontig_12.3	2467237	2470146	1455	-0.26124	7.36054	0.0056245	peaks1_common	150.115	179.914		Supercontig_12.3	2467236	2470146	NCU00059		7.22992	7.49116	0.26124	gray
Supercontig_12.5	1229388	1233183	1898	-0.26116	7.5832	0.00414781	peaks1_common	175.171	209.932		Supercontig_12.5	1229387	1233183	NCU04674		7.45262	7.71378	0.26116	gray
Supercontig_12.2	3388596	3390491	948	-0.26089	7.45495	0.00497227	peaks1_common	160.286	192.058		Supercontig_12.2	3388595	3390491	NCU08518		7.3245	7.5854	0.26089	gray
Supercontig_12.7	2711112	2712849	869	-0.26074	7.44781	0.0054243	peaks1_common	159.503	191.099		Supercontig_12.7	2711111	2712849	NCU02376		7.31744	7.57818	0.26074	gray
Supercontig_12.5	6358108	6360167	1030	-0.26029	7.77604	0.00309043	peaks1_common	200.283	239.883		Supercontig_12.5	6358107	6360167	NCU07171		7.6459	7.90619	0.26029	gray
Supercontig_12.2	174719	178574	1928	-0.26027	7.53684	0.00480465	peaks1_common	169.684	203.231		Supercontig_12.2	174718	178574	NCU03575		7.40671	7.66697	0.26027	gray
Supercontig_12.1	8294785	8297091	1153.5	-0.25994	7.63334	0.00393022	peaks1_common	181.443	217.265		Supercontig_12.1	8294784	8297091	NCU03049		7.50337	7.76331	0.25994	gray
Supercontig_12.1	5518643	5521403	1380.5	-0.25957	7.50279	0.00512953	peaks1_common	165.766	198.442		Supercontig_12.1	5518642	5521403	NCU08384		7.37301	7.63257	0.25957	gray
Supercontig_12.1	7764287	7768767	2240.5	-0.25943	7.49588	0.00510391	peaks1_common	164.982	197.484		Supercontig_12.1	7764286	7768767	NCU00629		7.36616	7.6256	0.25943	gray
Supercontig_12.7	3789800	3792519	1360	-0.25941	7.38937	0.00571126	peaks1_common	153.242	183.429		Supercontig_12.7	3789799	3792519	NCU05776		7.25967	7.51908	0.25941	gray
Supercontig_12.3	4504349	4506308	980	-0.25922	7.96625	0.00237838	peaks1_common	228.593	273.588		Supercontig_12.3	4504348	4506308	NCU11368		7.83664	8.09586	0.25922	gray
Supercontig_12.1	7477764	7480507	1372	-0.25911	7.27435	0.00701737	peaks1_common	141.513	169.355		Supercontig_12.1	7477763	7480507	NCU00709		7.14479	7.4039	0.25911	gray
Supercontig_12.2	319589	321915	1163.5	-0.2591	7.58859	0.00417121	peaks1_common	175.952	210.568		Supercontig_12.2	319588	321915	NCU03538		7.45904	7.71814	0.2591	gray
Supercontig_12.3	4064047	4067729	1841.5	-0.2591	7.58859	0.00417121	peaks1_common	175.952	210.568		Supercontig_12.3	4064046	4067729	NCU00497		7.45904	7.71814	0.2591	gray
Supercontig_12.1	716981	719354	1187	-0.25884	7.57555	0.00412424	peaks1_common	174.385	208.654		Supercontig_12.1	716980	719354	NCU10008		7.44613	7.70497	0.25884	gray
Supercontig_12.6	3108162	3109780	809.5	-0.25864	7.6757	0.00372575	peaks1_common	186.933	223.638		Supercontig_12.6	3108161	3109780	NCU06006		7.54638	7.80502	0.25864	gray
Supercontig_12.5	860567	862129	781.5	-0.25829	7.5491	0.00442876	peaks1_common	171.249	204.825		Supercontig_12.5	860566	862129	NCU09679		7.41996	7.67824	0.25829	gray
Supercontig_12.1	7754686	7760277	2796	-0.25815	7.4394	0.00539736	peaks1_common	158.718	189.818		Supercontig_12.1	7754685	7760277	NCU00631		7.31033	7.56847	0.25815	gray
Supercontig_12.2	2032917	2036333	1708.5	-0.25798	7.43218	0.00537017	peaks1_common	157.935	188.86		Supercontig_12.2	2032916	2036333	NCU06759		7.30319	7.56117	0.25798	gray
Supercontig_12.1	1087390	1089342	976.5	-0.25786	7.52894	0.00477985	peaks1_common	168.898	201.952		Supercontig_12.1	1087389	1089342	NCU02146		7.40001	7.65787	0.25786	gray
Supercontig_12.1	7769330	7772077	1374	-0.25756	7.51534	0.00472964	peaks1_common	167.331	200.037		Supercontig_12.1	7769329	7772077	NCU00628		7.38656	7.64412	0.25756	gray
Supercontig_12.7	3527512	3529760	1124.5	-0.25756	7.51534	0.00472964	peaks1_common	167.331	200.037		Supercontig_12.7	3527511	3529760	NCU08145		7.38656	7.64412	0.25756	gray
Supercontig_12.3	2110132	2114752	2310.5	-0.25748	7.31282	0.00598691	peaks1_common	145.42	173.833		Supercontig_12.3	2110131	2114752	NCU06263		7.18408	7.44156	0.25748	gray
Supercontig_12.7	1988140	1989513	687	-0.25732	7.60685	0.00421751	peaks1_common	178.303	213.118		Supercontig_12.7	1988139	1989513	NCU06045		7.47819	7.73551	0.25732	gray
Supercontig_12.5	3521382	3522895	757	-0.25727	7.30494	0.00653117	peaks1_common	144.638	172.874		Supercontig_12.5	3521381	3522895	NCU01284		7.17631	7.43358	0.25727	gray
Supercontig_12.1	5884085	5888390	2153	-0.25725	7.50161	0.00512953	peaks1_common	165.764	198.121		Supercontig_12.1	5884084	5888390	NCU09218		7.37298	7.63024	0.25725	gray
Supercontig_12.3	2786442	2787904	731.5	-0.25705	7.69892	0.00378851	peaks1_common	190.071	227.141		Supercontig_12.3	2786441	2787904	NCU00147		7.57039	7.82745	0.25705	gray
Supercontig_12.2	2933604	2936878	1637.5	-0.25693	7.48775	0.00507805	peaks1_common	164.197	196.205		Supercontig_12.2	2933603	2936878	NCU01625		7.35929	7.61621	0.25693	gray
Supercontig_12.3	272107	273360	627	-0.25688	11.5811	1.4847e-13	peaks1_common	2802.87	3349.13		Supercontig_12.3	272106	273360	NCU09179		11.4527	11.7096	0.25688	gray
Supercontig_12.7	1412419	1414475	1028.5	-0.25677	7.48077	0.00505196	peaks1_common	163.414	195.247		Supercontig_12.7	1412418	1414475	NCU12026		7.35239	7.60916	0.25677	gray
Supercontig_12.7	219417	220601	592.5	-0.25666	7.78547	0.00340901	peaks1_common	201.85	241.152		Supercontig_12.7	219416	220601	NCU09445		7.65714	7.9138	0.25666	gray
Supercontig_12.1	456742	461929	2594	-0.2566	7.47376	0.00550354	peaks1_common	162.631	194.289		Supercontig_12.1	456741	461929	NCU07484		7.34546	7.60206	0.2566	gray
Supercontig_12.6	1221833	1224234	1201	-0.2566	7.47376	0.00550354	peaks1_common	162.631	194.289		Supercontig_12.6	1221832	1224234	NCU05644		7.34546	7.60206	0.2566	gray
Supercontig_12.6	2447559	2453170	2806	-0.25611	7.35793	0.00613582	peaks1_common	150.11	179.269		Supercontig_12.6	2447558	2453170	NCU03938		7.22988	7.48599	0.25611	gray
Supercontig_12.7	925045	925845	400.5	-0.256	11.2878	1.63565e-11	peaks1_common	2287.87	2732.09		Supercontig_12.7	925044	925845	NCU17180		11.1598	11.4158	0.256	gray
Supercontig_12.3	1215452	1217505	1027	-0.25597	7.64374	0.00397445	peaks1_common	183.007	218.536		Supercontig_12.3	1215451	1217505	NCU07878		7.51576	7.77172	0.25597	gray
Supercontig_12.2	4359885	4361970	1043	-0.25572	7.8401	0.00327108	peaks1_common	209.708	250.377		Supercontig_12.2	4359884	4361970	NCU09461		7.71224	7.96796	0.25572	gray
Supercontig_12.4	5720246	5722347	1051	-0.25572	7.8401	0.00327108	peaks1_common	209.708	250.377		Supercontig_12.4	5720245	5722347	NCU05217		7.71224	7.96796	0.25572	gray
Supercontig_12.3	1573764	1581495	3866	-0.25554	7.43094	0.00537017	peaks1_common	157.933	188.538		Supercontig_12.3	1573763	1581495	NCU06484		7.30317	7.55871	0.25554	gray
Supercontig_12.5	2876648	2879688	1520.5	-0.25542	7.52099	0.00475485	peaks1_common	168.112	200.673		Supercontig_12.5	2876647	2879688	NCU01089		7.39328	7.6487	0.25542	gray
Supercontig_12.2	3855430	3859274	1922.5	-0.25536	7.42368	0.0053427	peaks1_common	157.15	187.58		Supercontig_12.2	3855429	3859274	NCU08741		7.296	7.55136	0.25536	gray
Supercontig_12.4	5690701	5693774	1537	-0.25536	7.42368	0.0053427	peaks1_common	157.15	187.58		Supercontig_12.4	5690700	5693774	NCU05225		7.296	7.55136	0.25536	gray
Supercontig_12.7	576344	580077	1867	-0.25478	7.40167	0.0057676	peaks1_common	154.802	184.703		Supercontig_12.7	576343	580077	NCU06867		7.27428	7.52906	0.25478	gray
Supercontig_12.2	235938	239499	1781	-0.25441	7.47957	0.00505196	peaks1_common	163.411	194.925		Supercontig_12.2	235937	239499	NCU03557		7.35236	7.60678	0.25441	gray
Supercontig_12.3	4011505	4016201	2348.5	-0.25441	7.47957	0.00505196	peaks1_common	163.411	194.925		Supercontig_12.3	4011504	4016201	NCU00481		7.35236	7.60678	0.25441	gray
Supercontig_12.4	3576352	3578439	1044	-0.25427	7.56673	0.00490175	peaks1_common	173.597	207.054		Supercontig_12.4	3576351	3578439	NCU10760		7.43959	7.69387	0.25427	gray
Supercontig_12.4	4792435	4797448	2507	-0.25417	7.37932	0.00568265	peaks1_common	152.455	181.825		Supercontig_12.4	4792434	4797448	NCU06988		7.25224	7.50641	0.25417	gray
Supercontig_12.3	679266	681905	1320	-0.25415	8.07831	0.00204706	peaks1_common	247.491	295.166		Supercontig_12.3	679265	681905	NCU05735		7.95123	8.20538	0.25415	gray
Supercontig_12.5	4639972	4642189	1109	-0.25405	7.4655	0.00547738	peaks1_common	161.846	193.009		Supercontig_12.5	4639971	4642189	NCU01468		7.33847	7.59252	0.25405	gray
Supercontig_12.3	4743262	4743806	272.5	-0.25405	11.2811	2.33141e-11	peaks1_common	2278.86	2717.65		Supercontig_12.3	4743261	4743806	NCU08237		11.1541	11.4081	0.25405	gray
Supercontig_12.2	278419	281093	1337.5	-0.25395	7.55348	0.00485361	peaks1_common	172.029	205.139		Supercontig_12.2	278418	281093	NCU03548		7.4265	7.68046	0.25395	gray
Supercontig_12.4	4163770	4165061	646	-0.25379	7.54681	0.00482923	peaks1_common	171.245	204.181		Supercontig_12.4	4163769	4165061	NCU08667		7.41992	7.67371	0.25379	gray
Supercontig_12.2	2025064	2027709	1323	-0.25367	7.45128	0.0054243	peaks1_common	160.279	191.091		Supercontig_12.2	2025063	2027709	NCU06761		7.32445	7.57811	0.25367	gray
Supercontig_12.3	3639325	3641409	1042.5	-0.25367	7.45128	0.0054243	peaks1_common	160.279	191.091		Supercontig_12.3	3639324	3641409	NCU00378		7.32445	7.57811	0.25367	gray
Supercontig_12.3	4858979	4859825	423.5	-0.2536	11.1637	1.16488e-10	peaks1_common	2101.07	2504.85		Supercontig_12.3	4858978	4859825	NCU08575		11.0369	11.2905	0.2536	gray
Supercontig_12.1	2406529	2409185	1328.5	-0.25348	7.44412	0.00539736	peaks1_common	159.496	190.132		Supercontig_12.1	2406528	2409185	NCU02464		7.31738	7.57086	0.25348	gray
Supercontig_12.6	2258026	2260872	1423.5	-0.25348	7.44412	0.00539736	peaks1_common	159.496	190.132		Supercontig_12.6	2258025	2260872	NCU03994		7.31738	7.57086	0.25348	gray
Supercontig_12.7	1421811	1423995	1092.5	-0.25329	7.43693	0.00587678	peaks1_common	158.714	189.175		Supercontig_12.7	1421810	1423995	NCU12024		7.31029	7.56357	0.25329	gray
Supercontig_12.6	2471466	2476654	2594.5	-0.25312	7.51982	0.00518008	peaks1_common	168.11	200.35		Supercontig_12.6	2471465	2476654	NCU03928		7.39326	7.64638	0.25312	gray
Supercontig_12.3	1834819	1837576	1379	-0.2531	7.42969	0.00584992	peaks1_common	157.93	188.215		Supercontig_12.3	1834818	1837576	NCU06189		7.30314	7.55624	0.2531	gray
Supercontig_12.4	3978581	3982163	1791.5	-0.25295	7.513	0.00515492	peaks1_common	167.327	199.394		Supercontig_12.4	3978580	3982163	NCU08036		7.38652	7.63948	0.25295	gray
Supercontig_12.2	3418758	3422478	1860.5	-0.25287	7.69083	0.00376772	peaks1_common	189.282	225.544		Supercontig_12.2	3418757	3422478	NCU08509		7.5644	7.81726	0.25287	gray
Supercontig_12.7	3186334	3189532	1599.5	-0.25277	7.50614	0.00560563	peaks1_common	166.543	198.435		Supercontig_12.7	3186333	3189532	NCU02248		7.37975	7.63253	0.25277	gray
Supercontig_12.2	1033650	1035268	809.5	-0.2525	7.76641	0.00335241	peaks1_common	199.488	237.644		Supercontig_12.2	1033649	1035268	NCU03344		7.64016	7.89266	0.2525	gray
Supercontig_12.4	3395214	3398185	1486	-0.25249	7.40778	0.0063037	peaks1_common	155.582	185.339		Supercontig_12.4	3395213	3398185	NCU04428		7.28153	7.53403	0.25249	gray
Supercontig_12.1	3239395	3243393	1999.5	-0.25241	7.49232	0.00510391	peaks1_common	164.976	196.519		Supercontig_12.1	3239394	3243393	NCU02699		7.36611	7.61852	0.25241	gray
Supercontig_12.5	2695984	2699842	1929.5	-0.25241	7.49232	0.00510391	peaks1_common	164.976	196.519		Supercontig_12.5	2695983	2699842	NCU01019		7.36611	7.61852	0.25241	gray
Supercontig_12.1	3078323	3080970	1324	-0.25219	7.66026	0.00401809	peaks1_common	185.357	220.763		Supercontig_12.1	3078322	3080970	NCU02655		7.53416	7.78635	0.25219	gray
Supercontig_12.6	1959245	1961250	1003	-0.25192	7.30222	0.00710624	peaks1_common	144.634	172.228		Supercontig_12.6	1959244	1961250	NCU12107		7.17626	7.42818	0.25192	gray
Supercontig_12.5	1474985	1478569	1792.5	-0.25166	7.46428	0.00547738	peaks1_common	161.843	192.686		Supercontig_12.5	1474984	1478569	NCU04617		7.33845	7.59011	0.25166	gray
Supercontig_12.4	3895865	3898276	1206	-0.25154	7.54567	0.00482923	peaks1_common	171.243	203.861		Supercontig_12.4	3895864	3898276	NCU08007		7.4199	7.67144	0.25154	gray
Supercontig_12.6	3970138	3971439	651	-0.25131	8.09513	0.00227887	peaks1_common	250.64	298.334		Supercontig_12.6	3970137	3971439	NCU05038		7.96947	8.22078	0.25131	gray
Supercontig_12.3	1380695	1384660	1983	-0.25119	7.53222	0.00522972	peaks1_common	169.674	201.944		Supercontig_12.3	1380694	1384660	NCU06428		7.40663	7.65781	0.25119	gray
Supercontig_12.4	3486723	3488507	892.5	-0.25085	7.43569	0.00587678	peaks1_common	158.712	188.852		Supercontig_12.4	3486722	3488507	NCU04400		7.31027	7.56112	0.25085	gray
Supercontig_12.1	2463840	2466909	1535	-0.25045	7.50496	0.00560563	peaks1_common	166.541	198.114		Supercontig_12.1	2463839	2466909	NCU02482		7.37973	7.63018	0.25045	gray
Supercontig_12.2	2042042	2044794	1376.5	-0.25016	7.57761	0.00492552	peaks1_common	175.16	208.325		Supercontig_12.2	2042041	2044794	NCU06757		7.45253	7.70269	0.25016	gray
Supercontig_12.1	6853023	6856811	1894.5	-0.2501	7.24568	0.00692486	peaks1_common	139.163	165.505		Supercontig_12.1	6853022	6856811	NCU00891		7.12063	7.37073	0.2501	gray
Supercontig_12.6	1017917	1022176	2130	-0.24999	7.32445	0.00659045	peaks1_common	146.978	174.786		Supercontig_12.6	1017916	1022176	NCU04840		7.19946	7.44944	0.24999	gray
Supercontig_12.5	2420296	2422699	1202	-0.24967	7.47717	0.00550354	peaks1_common	163.408	194.282		Supercontig_12.5	2420295	2422699	NCU03789		7.35233	7.60201	0.24967	gray
Supercontig_12.4	5340181	5342662	1241	-0.24964	7.64053	0.00433037	peaks1_common	183.001	217.572		Supercontig_12.4	5340180	5342662	NCU05319		7.51571	7.76535	0.24964	gray
Supercontig_12.3	588244	589464	610.5	-0.24964	7.80972	0.00348307	peaks1_common	205.772	244.644		Supercontig_12.3	588243	589464	NCU16617		7.6849	7.93454	0.24964	gray
Supercontig_12.7	2639743	2642464	1361	-0.24955	7.3917	0.00624901	peaks1_common	154.015	183.098		Supercontig_12.7	2639742	2642464	NCU02399		7.26692	7.51647	0.24955	gray
Supercontig_12.3	1924664	1927828	1582.5	-0.24947	7.47013	0.00598144	peaks1_common	162.624	193.322		Supercontig_12.3	1924663	1927828	NCU06213		7.34539	7.59487	0.24947	gray
Supercontig_12.5	5447758	5450274	1258.5	-0.24932	7.38424	0.0062212	peaks1_common	153.233	182.139		Supercontig_12.5	5447757	5450274	NCU11098		7.25958	7.5089	0.24932	gray
Supercontig_12.3	3021141	3022196	528	-0.24906	7.45597	0.00592967	peaks1_common	161.058	191.407		Supercontig_12.3	3021140	3022196	NCU00211		7.33144	7.5805	0.24906	gray
Supercontig_12.7	3989366	3991972	1303.5	-0.2489	7.53107	0.00522972	peaks1_common	169.674	201.624		Supercontig_12.7	3989365	3991972	NCU05835		7.40662	7.65552	0.2489	gray
Supercontig_12.7	166762	170125	1682	-0.24874	8.12525	0.00215635	peaks1_common	256.156	304.357		Supercontig_12.7	166761	170125	NCU09434		8.00088	8.24962	0.24874	gray
Supercontig_12.1	8747118	8748651	767	-0.24871	7.52429	0.00520502	peaks1_common	168.889	200.665		Supercontig_12.1	8747117	8748651	NCU02901		7.39993	7.64864	0.24871	gray
Supercontig_12.3	3592238	3594739	1251	-0.24866	7.60245	0.00459503	peaks1_common	178.295	211.832		Supercontig_12.3	3592237	3594739	NCU00366		7.47812	7.72678	0.24866	gray
Supercontig_12.7	1356915	1358712	899	-0.24853	8.21138	0.00183933	peaks1_common	271.934	323.057		Supercontig_12.7	1356914	1358712	NCU09723		8.08712	8.33565	0.24853	gray
Supercontig_12.7	3987604	3988744	570.5	-0.24849	7.84183	0.00327108	peaks1_common	210.487	250.05		Supercontig_12.7	3987603	3988744	NCU05834		7.71758	7.96607	0.24849	gray
Supercontig_12.5	1630822	1633154	1166.5	-0.24837	7.354	0.00667667	peaks1_common	150.104	178.303		Supercontig_12.5	1630821	1633154	NCU04575		7.22981	7.47818	0.24837	gray
Supercontig_12.1	1896783	1898329	773.5	-0.24832	7.51065	0.00515492	peaks1_common	167.323	198.75		Supercontig_12.1	1896782	1898329	NCU01949		7.38649	7.63481	0.24832	gray
Supercontig_12.7	998825	999910	543	-0.24789	7.81433	0.00380278	peaks1_common	206.555	245.278		Supercontig_12.7	998824	999910	NCU09560		7.69038	7.93828	0.24789	gray
Supercontig_12.4	4146320	4151302	2491.5	-0.24787	7.33863	0.0072193	peaks1_common	148.539	176.383		Supercontig_12.4	4146319	4151302	NCU08674		7.2147	7.46257	0.24787	gray
Supercontig_12.1	8309325	8314749	2712.5	-0.24785	7.65194	0.00475241	peaks1_common	184.569	219.164		Supercontig_12.1	8309324	8314749	NCU03045		7.52801	7.77586	0.24785	gray
Supercontig_12.4	1401245	1403435	1095.5	-0.24761	7.33089	0.00719161	peaks1_common	147.757	175.423		Supercontig_12.4	1401244	1403435	NCU16757		7.20709	7.4547	0.24761	gray
Supercontig_12.7	968576	970560	992.5	-0.2476	7.88386	0.00339221	peaks1_common	216.776	257.363		Supercontig_12.7	968575	970560	NCU09570		7.76006	8.00766	0.2476	gray
Supercontig_12.3	599368	600708	670.5	-0.24755	8.63982	0.000721588	peaks1_common	366.088	434.615		Supercontig_12.3	599367	600708	NCU05712		8.51605	8.76359	0.24755	gray
Supercontig_12.1	6514920	6518731	1906	-0.24751	7.48297	0.00552944	peaks1_common	164.189	194.918		Supercontig_12.1	6514919	6518731	NCU00978		7.35921	7.60672	0.24751	gray
Supercontig_12.6	2137956	2139189	617	-0.24751	7.48297	0.00552944	peaks1_common	164.189	194.918		Supercontig_12.6	2137955	2139189	NCU04027		7.35921	7.60672	0.24751	gray
Supercontig_12.7	93779	97154	1688	-0.24746	8.46403	0.00108641	peaks1_common	324.101	384.745		Supercontig_12.7	93778	97154	NCU09281		8.3403	8.58776	0.24746	gray
Supercontig_12.5	4673281	4676687	1703.5	-0.2474	7.55671	0.0053025	peaks1_common	172.806	205.132		Supercontig_12.5	4673280	4676687	NCU01459		7.43301	7.68041	0.2474	gray
Supercontig_12.1	6976621	6980270	1825	-0.24727	7.39785	0.00627651	peaks1_common	154.795	183.735		Supercontig_12.1	6976620	6980270	NCU16432		7.27421	7.52149	0.24727	gray
Supercontig_12.1	8600678	8602977	1150	-0.24721	7.55005	0.00527846	peaks1_common	172.021	204.174		Supercontig_12.1	8600677	8602977	NCU02954		7.42644	7.67365	0.24721	gray
Supercontig_12.3	2933803	2939195	2696.5	-0.24709	7.31528	0.00656099	peaks1_common	146.193	173.504		Supercontig_12.3	2933802	2939195	NCU00188		7.19173	7.43883	0.24709	gray
Supercontig_12.6	3160756	3162230	737.5	-0.24702	7.62053	0.00506396	peaks1_common	180.646	214.382		Supercontig_12.6	3160755	3162230	NCU12126		7.49702	7.74404	0.24702	gray
Supercontig_12.5	369556	371037	741	-0.24687	7.46185	0.00595569	peaks1_common	161.839	192.043		Supercontig_12.5	369555	371037	NCU07768		7.33841	7.58528	0.24687	gray
Supercontig_12.2	3786274	3788355	1041	-0.24665	7.45474	0.00592967	peaks1_common	161.056	191.084		Supercontig_12.2	3786273	3788355	NCU08718		7.33142	7.57806	0.24665	gray
Supercontig_12.1	2654272	2656311	1020	-0.24662	7.5299	0.00567959	peaks1_common	169.67	201.301		Supercontig_12.1	2654271	2656311	NCU02536		7.40659	7.65321	0.24662	gray
Supercontig_12.2	2345109	2347030	961	-0.24662	7.5299	0.00567959	peaks1_common	169.67	201.301		Supercontig_12.2	2345108	2347030	NCU01812		7.40659	7.65321	0.24662	gray
Supercontig_12.1	7223197	7226658	1731	-0.24642	7.52313	0.00565518	peaks1_common	168.888	200.345		Supercontig_12.1	7223196	7226658	NCU00772		7.39992	7.64634	0.24642	gray
Supercontig_12.2	970229	972101	936.5	-0.24642	7.52313	0.00565518	peaks1_common	168.888	200.345		Supercontig_12.2	970228	972101	NCU03361		7.39992	7.64634	0.24642	gray
Supercontig_12.1	4395595	4398319	1362.5	-0.24629	7.3679	0.0067324	peaks1_common	151.666	179.899		Supercontig_12.1	4395594	4398319	NCU03063		7.24476	7.49104	0.24629	gray
Supercontig_12.5	1353782	1355565	892	-0.24612	7.58841	0.00497246	peaks1_common	176.723	209.596		Supercontig_12.5	1353781	1355565	NCU04644		7.46535	7.71147	0.24612	gray
Supercontig_12.2	1595588	1599855	2134	-0.24604	7.36031	0.00670471	peaks1_common	150.883	178.94		Supercontig_12.2	1595587	1599855	NCU05425		7.23729	7.48333	0.24604	gray
Supercontig_12.1	1736763	1740530	1884	-0.24601	7.50947	0.00560563	peaks1_common	167.32	198.428		Supercontig_12.1	1736762	1740530	NCU01996		7.38646	7.63248	0.24601	gray
Supercontig_12.1	40950	42632	841.5	-0.24595	10.7639	2.17553e-08	peaks1_common	1596.74	1893.53		Supercontig_12.1	40949	42632	NCU09907		10.6409	10.8869	0.24595	gray
Supercontig_12.3	2014533	2017945	1706.5	-0.24576	7.65087	0.00475241	peaks1_common	184.566	218.843		Supercontig_12.3	2014532	2017945	NCU06239		7.52799	7.77375	0.24576	gray
Supercontig_12.1	7131344	7132928	792.5	-0.24573	7.42595	0.00635714	peaks1_common	157.924	187.249		Supercontig_12.1	7131343	7132928	NCU00798		7.30308	7.54881	0.24573	gray
Supercontig_12.4	3269555	3271861	1153.5	-0.24549	7.41867	0.00633057	peaks1_common	157.142	186.291		Supercontig_12.4	3269554	3271861	NCU04464		7.29593	7.54142	0.24549	gray
Supercontig_12.6	3322517	3326426	1955	-0.24515	7.55557	0.0053025	peaks1_common	172.804	204.81		Supercontig_12.6	3322516	3326426	NCU05956		7.43299	7.67815	0.24515	gray
Supercontig_12.5	2193402	2196570	1584.5	-0.24501	7.40398	0.00683979	peaks1_common	155.576	184.373		Supercontig_12.5	2193401	2196570	NCU03719		7.28147	7.52648	0.24501	gray
Supercontig_12.1	6862694	6864828	1067.5	-0.24492	7.47475	0.00550354	peaks1_common	163.403	193.637		Supercontig_12.1	6862693	6864828	NCU11195		7.35229	7.59721	0.24492	gray
Supercontig_12.7	1861091	1862396	653	-0.24433	7.52874	0.00567959	peaks1_common	169.669	200.98		Supercontig_12.7	1861090	1862396	NCU06086		7.40658	7.6509	0.24433	gray
Supercontig_12.1	7002702	7004301	800	-0.24423	7.45352	0.00592967	peaks1_common	161.054	190.763		Supercontig_12.1	7002701	7004301	NCU00837		7.3314	7.57563	0.24423	gray
Supercontig_12.3	4537104	4539418	1157.5	-0.24369	8.91856	0.000402318	peaks1_common	444.708	526.542		Supercontig_12.3	4537103	4539418	NCU07518		8.79672	9.0404	0.24369	gray
Supercontig_12.3	1790619	1792643	1012.5	-0.24368	7.50829	0.00560563	peaks1_common	167.318	198.106		Supercontig_12.3	1790618	1792643	NCU06180		7.38645	7.63013	0.24368	gray
Supercontig_12.3	2918959	2921024	1033	-0.24368	7.50829	0.00560563	peaks1_common	167.318	198.106		Supercontig_12.3	2918958	2921024	NCU00181		7.38645	7.63013	0.24368	gray
Supercontig_12.3	1484054	1486735	1341	-0.24346	7.50141	0.00608172	peaks1_common	166.535	197.149		Supercontig_12.3	1484053	1486735	NCU06460		7.37968	7.62314	0.24346	gray
Supercontig_12.4	4204634	4206977	1172	-0.24346	7.359	0.00670471	peaks1_common	150.881	178.618		Supercontig_12.4	4204633	4206977	NCU08656		7.23727	7.48073	0.24346	gray
Supercontig_12.6	4097857	4099807	975.5	-0.24326	8.07277	0.00242194	peaks1_common	247.475	292.928		Supercontig_12.6	4097856	4099807	NCU05009		7.95114	8.1944	0.24326	gray
Supercontig_12.6	264919	268028	1555	-0.24302	7.41741	0.00633057	peaks1_common	157.139	185.969		Supercontig_12.6	264918	268028	NCU07069		7.2959	7.53892	0.24302	gray
Supercontig_12.1	644063	646234	1086	-0.2429	7.55443	0.00575139	peaks1_common	172.802	204.489		Supercontig_12.1	644062	646234	NCU07432		7.43298	7.67588	0.2429	gray
Supercontig_12.6	1441109	1442788	840	-0.2429	7.55443	0.00575139	peaks1_common	172.802	204.489		Supercontig_12.6	1441108	1442788	NCU05580		7.43298	7.67588	0.2429	gray
Supercontig_12.2	2877350	2878740	695.5	-0.24265	7.75572	0.00430751	peaks1_common	198.693	235.086		Supercontig_12.2	2877349	2878740	NCU01634		7.63439	7.87704	0.24265	gray
Supercontig_12.1	1647684	1650672	1494.5	-0.24254	7.47354	0.00598144	peaks1_common	163.401	193.315		Supercontig_12.1	1647683	1650672	NCU02022		7.35227	7.59481	0.24254	gray
Supercontig_12.2	2519739	2521550	906	-0.2423	7.46649	0.00648549	peaks1_common	162.618	192.357		Supercontig_12.2	2519738	2521550	NCU01762		7.34534	7.58764	0.2423	gray
Supercontig_12.4	4532625	4534989	1182.5	-0.2423	7.46649	0.00648549	peaks1_common	162.618	192.357		Supercontig_12.4	4532624	4534989	NCU07281		7.34534	7.58764	0.2423	gray
Supercontig_12.1	4272048	4276396	2174.5	-0.24226	7.53434	0.00522972	peaks1_common	170.451	201.617		Supercontig_12.1	4272047	4276396	NCU09316		7.41321	7.65547	0.24226	gray
Supercontig_12.1	8574520	8576334	907.5	-0.24226	7.53434	0.00522972	peaks1_common	170.451	201.617		Supercontig_12.1	8574519	8576334	NCU16466		7.41321	7.65547	0.24226	gray
Supercontig_12.1	7173317	7176521	1602.5	-0.24206	7.45941	0.00646041	peaks1_common	161.835	191.399		Supercontig_12.1	7173316	7176521	NCU00788		7.33838	7.58044	0.24206	gray
Supercontig_12.5	5205372	5208662	1645.5	-0.24206	7.45941	0.00646041	peaks1_common	161.835	191.399		Supercontig_12.5	5205371	5208662	NCU04208		7.33838	7.58044	0.24206	gray
Supercontig_12.2	4034930	4036895	983	-0.24204	7.52758	0.00567959	peaks1_common	169.667	200.659		Supercontig_12.2	4034929	4036895	NCU08428		7.40656	7.6486	0.24204	gray
Supercontig_12.4	3036077	3039627	1775.5	-0.24203	7.24966	0.00821091	peaks1_common	139.938	165.499		Supercontig_12.4	3036076	3039627	NCU06284		7.12864	7.37068	0.24203	gray
Supercontig_12.2	2495551	2497599	1024.5	-0.24181	7.52079	0.00565518	peaks1_common	168.884	199.701		Supercontig_12.2	2495550	2497599	NCU01771		7.39988	7.6417	0.24181	gray
Supercontig_12.6	3944720	3946893	1087	-0.24174	8.22459	0.00202925	peaks1_common	275.082	325.262		Supercontig_12.6	3944719	3946893	NCU05045		8.10372	8.34546	0.24174	gray
Supercontig_12.1	9355990	9358427	1219	-0.24151	7.57966	0.0053733	peaks1_common	175.936	207.996		Supercontig_12.1	9355989	9358427	NCU09266		7.45891	7.70042	0.24151	gray
Supercontig_12.4	2815146	2817977	1416	-0.24151	7.57966	0.0053733	peaks1_common	175.936	207.996		Supercontig_12.4	2815145	2817977	NCU06351		7.45891	7.70042	0.24151	gray
Supercontig_12.7	3916147	3918622	1238	-0.24146	7.30468	0.00710624	peaks1_common	145.407	171.898		Supercontig_12.7	3916146	3918622	NCU05813		7.18395	7.42541	0.24146	gray
Supercontig_12.4	4419793	4422071	1139.5	-0.24109	7.56653	0.00532632	peaks1_common	174.367	206.082		Supercontig_12.4	4419792	4422071	NCU07309		7.44599	7.68707	0.24109	gray
Supercontig_12.2	2005400	2009406	2003.5	-0.24106	7.43071	0.0063834	peaks1_common	158.702	187.564		Supercontig_12.2	2005399	2009406	NCU06767		7.31018	7.55124	0.24106	gray
Supercontig_12.5	5339948	5343181	1617	-0.24106	7.43071	0.0063834	peaks1_common	158.702	187.564		Supercontig_12.5	5339947	5343181	NCU04245		7.31018	7.55124	0.24106	gray
Supercontig_12.5	4968063	4969576	757	-0.2408	7.42345	0.00635714	peaks1_common	157.92	186.606		Supercontig_12.5	4968062	4969576	NCU04138		7.30305	7.54385	0.2408	gray
Supercontig_12.1	8555736	8558365	1315	-0.24071	7.21642	0.00812452	peaks1_common	136.813	161.655		Supercontig_12.1	8555735	8558365	NCU02965		7.09606	7.33678	0.24071	gray
Supercontig_12.1	8348397	8350296	950	-0.24052	7.74893	0.00428775	peaks1_common	197.906	233.81		Supercontig_12.1	8348396	8350296	NCU03040		7.62867	7.86919	0.24052	gray
Supercontig_12.5	5316450	5318445	998	-0.24043	7.54661	0.00572769	peaks1_common	172.016	203.21		Supercontig_12.5	5316449	5318445	NCU04238		7.4264	7.66683	0.24043	gray
Supercontig_12.5	2361891	2366042	2076	-0.2404	7.47936	0.00600691	peaks1_common	164.183	193.953		Supercontig_12.5	2361890	2366042	NCU03771		7.35916	7.59956	0.2404	gray
Supercontig_12.4	5946299	5947549	625.5	-0.24033	10.9793	5.05694e-09	peaks1_common	1857.49	2194.18		Supercontig_12.4	5946298	5947549	NCU16906		10.8591	11.0995	0.24033	gray
Supercontig_12.2	2563824	2566935	1556	-0.24027	7.40881	0.0063037	peaks1_common	156.354	184.688		Supercontig_12.2	2563823	2566935	NCU01745		7.28867	7.52894	0.24027	gray
Supercontig_12.2	2552371	2553509	569.5	-0.23983	7.72549	0.00458491	peaks1_common	194.763	229.986		Supercontig_12.2	2552370	2553509	NCU01750		7.60558	7.8454	0.23983	gray
Supercontig_12.4	1217024	1219852	1414.5	-0.23974	7.52641	0.00615417	peaks1_common	169.664	200.336		Supercontig_12.4	1217023	1219852	NCU07960		7.40654	7.64628	0.23974	gray
Supercontig_12.5	1597125	1600021	1448.5	-0.23974	7.52641	0.00615417	peaks1_common	169.664	200.336		Supercontig_12.5	1597124	1600021	NCU10156		7.40654	7.64628	0.23974	gray
Supercontig_12.1	1509113	1511198	1043	-0.23957	7.25644	0.0082388	peaks1_common	140.717	166.136		Supercontig_12.1	1509112	1511198	NCU02058		7.13665	7.37622	0.23957	gray
Supercontig_12.4	2759529	2762232	1352	-0.23951	7.51961	0.00613028	peaks1_common	168.88	199.378		Supercontig_12.4	2759528	2762232	NCU06369		7.39986	7.63937	0.23951	gray
Supercontig_12.7	2935558	2938934	1688.5	-0.2394	7.45106	0.00643503	peaks1_common	161.049	190.119		Supercontig_12.7	2935557	2938934	NCU02320		7.33136	7.57076	0.2394	gray
Supercontig_12.1	2768528	2773025	2249	-0.23927	7.51279	0.00610613	peaks1_common	168.098	198.422		Supercontig_12.1	2768527	2773025	NCU02572		7.39315	7.63242	0.23927	gray
Supercontig_12.1	6807058	6810098	1520.5	-0.23916	7.37908	0.00675975	peaks1_common	153.224	180.851		Supercontig_12.1	6807057	6810098	NCU00905		7.2595	7.49866	0.23916	gray
Supercontig_12.2	548674	552323	1825	-0.23909	7.31121	0.00713508	peaks1_common	146.186	172.536		Supercontig_12.2	548673	552323	NCU03480		7.19166	7.43076	0.23909	gray
Supercontig_12.1	9184315	9191423	3554.5	-0.23885	7.5654	0.00532632	peaks1_common	174.366	205.761		Supercontig_12.1	9184314	9191423	NCU02789		7.44598	7.68482	0.23885	gray
Supercontig_12.3	4068126	4071377	1626	-0.23883	7.62884	0.00508634	peaks1_common	182.206	215.009		Supercontig_12.3	4068125	4071377	NCU00498		7.50942	7.74825	0.23883	gray
Supercontig_12.7	1376984	1379572	1294.5	-0.23862	7.55878	0.00577485	peaks1_common	173.582	204.803		Supercontig_12.7	1376983	1379572	NCU09715		7.43947	7.67809	0.23862	gray
Supercontig_12.6	1665137	1666810	837	-0.2386	7.42946	0.00691689	peaks1_common	158.7	187.242		Supercontig_12.6	1665136	1666810	NCU05510		7.31016	7.54876	0.2386	gray
Supercontig_12.1	1978041	1978736	348	-0.23841	7.61615	0.00548702	peaks1_common	180.636	213.095		Supercontig_12.1	1978040	1978736	NCU16344		7.49694	7.73536	0.23841	gray
Supercontig_12.7	1316548	1318623	1038	-0.23832	9.1882	0.000209533	peaks1_common	537.097	633.57		Supercontig_12.7	1316547	1318623	NCU10055		9.06904	9.30736	0.23832	gray
Supercontig_12.2	3937327	3938667	670.5	-0.23828	8.25962	0.00194251	peaks1_common	282.182	332.857		Supercontig_12.2	3937326	3938667	NCU08402		8.14048	8.37876	0.23828	gray
Supercontig_12.1	4247227	4251744	2259	-0.23816	7.54546	0.00572769	peaks1_common	172.014	202.888		Supercontig_12.1	4247226	4251744	NCU09322		7.42638	7.66454	0.23816	gray
Supercontig_12.4	5613863	5615538	838	-0.23792	7.53875	0.00570376	peaks1_common	171.23	201.93		Supercontig_12.4	5613862	5615538	NCU10101		7.41979	7.65771	0.23792	gray
Supercontig_12.2	3582822	3587141	2160	-0.23777	7.47112	0.00598144	peaks1_common	163.397	192.672		Supercontig_12.2	3582821	3587141	NCU08452		7.35224	7.59	0.23777	gray
Supercontig_12.1	1991094	1994771	1839	-0.23776	7.59691	0.00541942	peaks1_common	178.284	210.225		Supercontig_12.1	1991093	1994771	NCU01927		7.47803	7.71579	0.23776	gray
Supercontig_12.2	356390	358365	988	-0.23776	7.59691	0.00541942	peaks1_common	178.284	210.225		Supercontig_12.2	356389	358365	NCU03527		7.47803	7.71579	0.23776	gray
Supercontig_12.3	1059964	1062628	1332.5	-0.23761	7.90473	0.00374656	peaks1_common	220.697	260.21		Supercontig_12.3	1059963	1062628	NCU07840		7.78592	8.02353	0.23761	gray
Supercontig_12.1	9272188	9275044	1428.5	-0.23753	7.65282	0.00475241	peaks1_common	185.343	218.514		Supercontig_12.1	9272187	9275044	NCU02767		7.53405	7.77159	0.23753	gray
Supercontig_12.4	4327999	4329934	968	-0.23747	7.8995	0.00372969	peaks1_common	219.909	259.256		Supercontig_12.4	4327998	4329934	NCU07336		7.78077	8.01824	0.23747	gray
Supercontig_12.4	4838135	4840565	1215.5	-0.23737	7.3333	0.00781906	peaks1_common	148.53	175.094		Supercontig_12.4	4838134	4840565	NCU07001		7.21462	7.45199	0.23737	gray
Supercontig_12.2	474216	476804	1294.5	-0.2372	7.39274	0.00737787	peaks1_common	154.787	182.448		Supercontig_12.2	474215	476804	NCU03498		7.27414	7.51134	0.2372	gray
Supercontig_12.7	3633090	3635906	1408.5	-0.23697	7.44983	0.00643503	peaks1_common	161.048	189.797		Supercontig_12.7	3633089	3635906	NCU08174		7.33134	7.56831	0.23697	gray
Supercontig_12.6	1431847	1434713	1433.5	-0.23695	7.51161	0.00610613	peaks1_common	168.095	198.1		Supercontig_12.6	1431846	1434713	NCU05582		7.39313	7.63008	0.23695	gray
Supercontig_12.7	209181	214330	2575	-0.23688	7.69462	0.00488049	peaks1_common	190.835	224.888		Supercontig_12.7	209180	214330	NCU09443		7.57618	7.81306	0.23688	gray
Supercontig_12.6	2553640	2558566	2463.5	-0.23685	7.57085	0.00579808	peaks1_common	175.147	206.397		Supercontig_12.6	2553639	2558566	NCU03894		7.45243	7.68927	0.23685	gray
Supercontig_12.5	5868146	5869980	917.5	-0.23622	7.73524	0.00460512	peaks1_common	196.329	231.256		Supercontig_12.5	5868145	5869980	NCU08969		7.61713	7.85335	0.23622	gray
Supercontig_12.5	5749258	5753326	2034.5	-0.23614	7.55099	0.00575139	peaks1_common	172.795	203.525		Supercontig_12.5	5749257	5753326	NCU08934		7.43292	7.66906	0.23614	gray
Supercontig_12.6	3087616	3088855	620	-0.23603	7.72936	0.00498258	peaks1_common	195.543	230.301		Supercontig_12.6	3087615	3088855	NCU17123		7.61135	7.84737	0.23603	gray
Supercontig_12.2	1504154	1508382	2114.5	-0.23602	7.60867	0.0054647	peaks1_common	179.851	211.818		Supercontig_12.2	1504153	1508382	NCU05392		7.49066	7.72668	0.23602	gray
Supercontig_12.2	301043	305699	2328.5	-0.23591	7.48394	0.00653479	peaks1_common	164.961	194.267		Supercontig_12.2	301042	305699	NCU03544		7.36599	7.6019	0.23591	gray
Supercontig_12.3	1063208	1065157	975	-0.23564	7.65795	0.00517399	peaks1_common	186.125	219.149		Supercontig_12.3	1063207	1065157	NCU07841		7.54013	7.77577	0.23564	gray
Supercontig_12.1	7640084	7643505	1711	-0.23557	7.5958	0.00541942	peaks1_common	178.282	209.904		Supercontig_12.1	7640083	7643505	NCU00664		7.47801	7.71359	0.23557	gray
Supercontig_12.5	5573392	5574957	783	-0.23539	7.53085	0.00567959	peaks1_common	170.444	200.651		Supercontig_12.5	5573391	5574957	NCU04309		7.41316	7.64854	0.23539	gray
Supercontig_12.5	5464383	5466903	1260.5	-0.23538	7.4699	0.00648549	peaks1_common	163.394	192.35		Supercontig_12.5	5464382	5466903	NCU04275		7.35221	7.58759	0.23538	gray
Supercontig_12.2	179438	185280	2921.5	-0.23533	7.58932	0.00539647	peaks1_common	177.498	208.946		Supercontig_12.2	179437	185280	NCU03573		7.47165	7.70699	0.23533	gray
Supercontig_12.1	6537038	6538556	759.5	-0.2351	7.58282	0.00584384	peaks1_common	176.714	207.99		Supercontig_12.1	6537037	6538556	NCU00973		7.46527	7.70037	0.2351	gray
Supercontig_12.1	6493466	6497204	1869.5	-0.23504	7.69961	0.00490124	peaks1_common	191.618	225.523		Supercontig_12.1	6493465	6497204	NCU00984		7.58209	7.81713	0.23504	gray
Supercontig_12.1	5904413	5906736	1162	-0.23486	7.57628	0.00582107	peaks1_common	175.929	207.032		Supercontig_12.1	5904412	5906736	NCU09224		7.45885	7.69371	0.23486	gray
Supercontig_12.3	2043398	2048960	2781.5	-0.23482	7.45573	0.00699115	peaks1_common	161.828	190.433		Supercontig_12.3	2043397	2048960	NCU06249		7.33832	7.57314	0.23482	gray
Supercontig_12.6	2418894	2421060	1083.5	-0.23454	7.62667	0.00550914	peaks1_common	182.203	214.367		Supercontig_12.6	2418893	2421060	NCU03949		7.5094	7.74394	0.23454	gray
Supercontig_12.3	1444168	1448796	2314.5	-0.23454	7.44859	0.0069667	peaks1_common	161.045	189.475		Supercontig_12.3	1444167	1448796	NCU06449		7.33132	7.56586	0.23454	gray
Supercontig_12.5	3059102	3062061	1480	-0.23436	7.50355	0.00608172	peaks1_common	167.309	196.82		Supercontig_12.5	3059101	3062061	NCU01154		7.38637	7.62073	0.23436	gray
Supercontig_12.2	3362517	3365547	1515.5	-0.23425	7.44142	0.00640937	peaks1_common	160.263	188.516		Supercontig_12.2	3362516	3365547	NCU10036		7.32429	7.55855	0.23425	gray
Supercontig_12.3	344838	345608	385.5	-0.23418	10.8564	3.07141e-08	peaks1_common	1709.49	2010.77		Supercontig_12.3	344837	345608	NCU10005		10.7393	10.9735	0.23418	gray
Supercontig_12.3	4652962	4654746	892.5	-0.23417	10.9261	1.76323e-08	peaks1_common	1794	2110.16		Supercontig_12.3	4652961	4654746	NCU08212		10.809	11.0431	0.23417	gray
Supercontig_12.1	2531832	2533997	1083	-0.23412	7.55649	0.0062472	peaks1_common	173.577	204.159		Supercontig_12.1	2531831	2533997	NCU02500		7.43943	7.67355	0.23412	gray
Supercontig_12.7	3858399	3861869	1735.5	-0.23412	7.55649	0.0062472	peaks1_common	173.577	204.159		Supercontig_12.7	3858398	3861869	NCU05798		7.43943	7.67355	0.23412	gray
Supercontig_12.4	2600095	2601716	811	-0.23409	7.49665	0.00658296	peaks1_common	166.526	195.862		Supercontig_12.4	2600094	2601716	NCU08268		7.37961	7.61369	0.23409	gray
Supercontig_12.5	5888129	5889342	607	-0.23403	7.72835	0.00498258	peaks1_common	195.542	229.98		Supercontig_12.5	5888128	5889342	NCU10063		7.61133	7.84536	0.23403	gray
Supercontig_12.1	9515230	9517842	1306.5	-0.23381	7.77947	0.00474234	peaks1_common	202.61	238.257		Supercontig_12.1	9515229	9517842	NCU08594		7.66256	7.89637	0.23381	gray
Supercontig_12.4	4851842	4854795	1477	-0.23363	7.24539	0.00821091	peaks1_common	139.931	164.53		Supercontig_12.4	4851841	4854795	NCU07003		7.12857	7.36221	0.23363	gray
Supercontig_12.3	2418803	2421092	1145	-0.23362	7.54315	0.00620118	peaks1_common	172.009	202.245		Supercontig_12.3	2418802	2421092	NCU00052		7.42634	7.65996	0.23362	gray
Supercontig_12.5	6030837	6031483	323.5	-0.23355	10.7773	7.09072e-08	peaks1_common	1618.55	1902.97		Supercontig_12.5	6030836	6031483	NCU09951		10.6605	10.894	0.23355	gray
Supercontig_12.1	7375502	7377192	845.5	-0.23342	7.36136	0.00789568	peaks1_common	151.655	178.289		Supercontig_12.1	7375501	7377192	NCU00736		7.24465	7.47807	0.23342	gray
Supercontig_12.5	3119083	3121919	1418.5	-0.23326	7.47573	0.00651028	peaks1_common	164.176	192.987		Supercontig_12.5	3119082	3121919	NCU01171		7.3591	7.59236	0.23326	gray
Supercontig_12.1	5703756	5705407	826	-0.2331	7.52968	0.00615417	peaks1_common	170.441	200.329		Supercontig_12.1	5703755	5705407	NCU08337		7.41313	7.64623	0.2331	gray
Supercontig_12.2	2036222	2041135	2457	-0.2331	7.52968	0.00615417	peaks1_common	170.441	200.329		Supercontig_12.2	2036221	2041135	NCU06758		7.41313	7.64623	0.2331	gray
Supercontig_12.4	3589960	3595771	2906	-0.23309	7.35373	0.00787051	peaks1_common	150.872	177.328		Supercontig_12.4	3589959	3595771	NCU04373		7.23719	7.47027	0.23309	gray
Supercontig_12.4	5776486	5780577	2046	-0.23298	7.46869	0.00648549	peaks1_common	163.393	192.029		Supercontig_12.4	5776485	5780577	NCU05200		7.3522	7.58518	0.23298	gray
Supercontig_12.3	2040698	2043060	1181.5	-0.23289	7.22882	0.00815378	peaks1_common	138.369	162.609		Supercontig_12.3	2040697	2043060	NCU06248		7.11237	7.34526	0.23289	gray
Supercontig_12.4	150566	153323	1379	-0.23262	7.96757	0.00362148	peaks1_common	230.922	271.325		Supercontig_12.4	150565	153323	NCU07584		7.85126	8.08388	0.23262	gray
Supercontig_12.7	3709837	3712768	1466	-0.23257	7.68648	0.00525866	peaks1_common	190.045	223.288		Supercontig_12.7	3709836	3712768	NCU05752		7.57019	7.80277	0.23257	gray
Supercontig_12.2	3391426	3395249	1912	-0.23245	7.3976	0.00740306	peaks1_common	155.565	182.762		Supercontig_12.2	3391425	3395249	NCU08517		7.28137	7.51383	0.23245	gray
Supercontig_12.5	4219692	4222700	1504.5	-0.23243	7.33836	0.00781906	peaks1_common	149.308	175.409		Supercontig_12.5	4219691	4222700	NCU06675		7.22214	7.45458	0.23243	gray
Supercontig_12.4	5564533	5569217	2342.5	-0.23229	7.50924	0.00660663	peaks1_common	168.091	197.456		Supercontig_12.4	5564532	5569217	NCU05260		7.39309	7.62538	0.23229	gray
Supercontig_12.4	3791159	3794517	1679.5	-0.23196	7.2685	0.00826625	peaks1_common	142.273	167.09		Supercontig_12.4	3791158	3794517	NCU07981		7.15252	7.38448	0.23196	gray
Supercontig_12.3	449717	452595	1439.5	-0.23194	10.7106	1.33473e-07	peaks1_common	1546.33	1816.03		Supercontig_12.3	449716	452595	NCU05674		10.5946	10.8266	0.23194	gray
Supercontig_12.1	2577476	2579423	974	-0.23173	7.49545	0.00658296	peaks1_common	166.524	195.539		Supercontig_12.1	2577475	2579423	NCU02513		7.37959	7.61132	0.23173	gray
Supercontig_12.1	7169090	7172986	1948.5	-0.23173	7.49545	0.00658296	peaks1_common	166.524	195.539		Supercontig_12.1	7169089	7172986	NCU00789		7.37959	7.61132	0.23173	gray
Supercontig_12.2	2439817	2443073	1628.5	-0.23167	7.662	0.00561669	peaks1_common	186.905	219.463		Supercontig_12.2	2439816	2443073	NCU01788		7.54616	7.77783	0.23167	gray
Supercontig_12.6	823844	827065	1611	-0.23158	7.26037	0.0082388	peaks1_common	141.492	166.129		Supercontig_12.6	823843	827065	NCU04790		7.14458	7.37616	0.23158	gray
Supercontig_12.3	4408141	4411049	1454.5	-0.23149	7.37518	0.00732643	peaks1_common	153.217	179.884		Supercontig_12.3	4408140	4411049	NCU07548		7.25944	7.49092	0.23149	gray
Supercontig_12.3	1458069	1461873	1902.5	-0.23145	7.48851	0.00655901	peaks1_common	165.741	194.582		Supercontig_12.3	1458068	1461873	NCU06453		7.37278	7.60423	0.23145	gray
Supercontig_12.7	2855648	2856782	567.5	-0.23144	7.65582	0.00517399	peaks1_common	186.121	218.508		Supercontig_12.7	2855647	2856782	NCU02340		7.5401	7.77154	0.23144	gray
Supercontig_12.2	4219234	4222288	1527.5	-0.23139	7.70953	0.00492182	peaks1_common	193.184	226.792		Supercontig_12.2	4219233	4222288	NCU09354		7.59384	7.82522	0.23139	gray
Supercontig_12.3	3817378	3818117	370	-0.2312	7.4257	0.00747664	peaks1_common	158.694	186.276		Supercontig_12.3	3817377	3818117	NCU00425		7.3101	7.5413	0.2312	gray
Supercontig_12.5	1620719	1622127	704.5	-0.23116	7.36763	0.00730019	peaks1_common	152.435	178.925		Supercontig_12.5	1620718	1622127	NCU04578		7.25205	7.48321	0.23116	gray
Supercontig_12.1	5455257	5457679	1211.5	-0.23107	7.53527	0.0061778	peaks1_common	171.223	200.966		Supercontig_12.1	5455256	5457679	NCU09135		7.41973	7.6508	0.23107	gray
Supercontig_12.4	2452321	2455814	1747	-0.23092	7.58708	0.00584384	peaks1_common	177.493	208.303		Supercontig_12.4	2452320	2455814	NCU08309		7.47162	7.70254	0.23092	gray
Supercontig_12.2	2455889	2460586	2349	-0.23087	7.47451	0.00651028	peaks1_common	164.173	192.664		Supercontig_12.2	2455888	2460586	NCU01782		7.35908	7.58995	0.23087	gray
Supercontig_12.2	4360689	4361822	567	-0.23077	7.85422	0.00424963	peaks1_common	213.61	250.663		Supercontig_12.2	4360688	4361822	NCU09462		7.73883	7.96961	0.23077	gray
Supercontig_12.5	1444535	1446688	1077	-0.23014	7.56744	0.00626984	peaks1_common	175.141	205.431		Supercontig_12.5	1444534	1446688	NCU04624		7.45237	7.68251	0.23014	gray
Supercontig_12.3	416218	416814	298.5	-0.23007	10.6883	2.0005e-07	peaks1_common	1523.61	1787.03		Supercontig_12.3	416217	416814	NCU05666		10.5733	10.8033	0.23007	gray
Supercontig_12.2	1708515	1708959	222.5	-0.23004	8.92958	0.000568508	peaks1_common	450.243	528.075		Supercontig_12.2	1708514	1708959	NCU10369		8.81456	9.0446	0.23004	gray
Supercontig_12.5	5518068	5521469	1701	-0.22996	7.50806	0.00660663	peaks1_common	168.089	197.135		Supercontig_12.5	5518067	5521469	NCU04291		7.39308	7.62304	0.22996	gray
Supercontig_12.2	848327	850781	1227.5	-0.22957	7.27519	0.00829326	peaks1_common	143.053	167.727		Supercontig_12.2	848326	850781	NCU03399		7.16041	7.38998	0.22957	gray
Supercontig_12.6	2096147	2098844	1349	-0.2295	7.60535	0.00591079	peaks1_common	179.844	210.854		Supercontig_12.6	2096146	2098844	NCU04041		7.4906	7.7201	0.2295	gray
Supercontig_12.3	4230810	4238444	3817.5	-0.22938	7.49425	0.00710887	peaks1_common	166.521	195.218		Supercontig_12.3	4230809	4238444	NCU09012		7.37956	7.60894	0.22938	gray
Supercontig_12.2	2797974	2801265	1646	-0.22933	7.54753	0.00622431	peaks1_common	172.789	202.559		Supercontig_12.2	2797973	2801265	NCU01654		7.43286	7.6622	0.22933	gray
Supercontig_12.4	2831511	2835170	1830	-0.22926	7.3814	0.00735232	peaks1_common	153.998	180.522		Supercontig_12.4	2831510	2835170	NCU06344		7.26677	7.49603	0.22926	gray
Supercontig_12.7	4177264	4178951	844	-0.22898	8.00933	0.00345571	peaks1_common	238.004	278.942		Supercontig_12.7	4177263	4178951	NCU05890		7.89484	8.12382	0.22898	gray
Supercontig_12.1	1715205	1718857	1826.5	-0.22898	7.59245	0.00586638	peaks1_common	178.275	208.939		Supercontig_12.1	1715204	1718857	NCU02002		7.47796	7.70694	0.22898	gray
Supercontig_12.6	3362030	3364815	1393	-0.22898	7.59245	0.00586638	peaks1_common	178.275	208.939		Supercontig_12.6	3362029	3364815	NCU12130		7.47796	7.70694	0.22898	gray
Supercontig_12.3	3111373	3114227	1427.5	-0.22878	7.48032	0.00706267	peaks1_common	164.955	193.302		Supercontig_12.3	3111372	3114227	NCU11175		7.36593	7.59471	0.22878	gray
Supercontig_12.3	3185154	3186767	807	-0.22878	7.48032	0.00706267	peaks1_common	164.955	193.302		Supercontig_12.3	3185153	3186767	NCU00253		7.36593	7.59471	0.22878	gray
Supercontig_12.1	837953	839866	957	-0.22849	7.52734	0.00615417	peaks1_common	170.437	199.685		Supercontig_12.1	837952	839866	NCU09095		7.4131	7.64158	0.22849	gray
Supercontig_12.7	2482904	2485201	1149	-0.22809	7.62339	0.00595432	peaks1_common	182.196	213.403		Supercontig_12.7	2482903	2485201	NCU02438		7.50935	7.73744	0.22809	gray
Supercontig_12.1	9764400	9765935	768	-0.22791	8.27838	0.00232864	peaks1_common	286.904	336.004		Supercontig_12.1	9764399	9765935	NCU10028		8.16442	8.39233	0.22791	gray
Supercontig_12.1	6706181	6708411	1115.5	-0.22786	7.45916	0.00757017	peaks1_common	162.605	190.426		Supercontig_12.1	6706180	6708411	NCU00925		7.34523	7.57309	0.22786	gray
Supercontig_12.1	2364182	2366871	1345	-0.22772	7.66604	0.0056376	peaks1_common	187.686	219.778		Supercontig_12.1	2364181	2366871	NCU09978		7.55218	7.7799	0.22772	gray
Supercontig_12.5	1891131	1892721	795.5	-0.22755	7.45204	0.00754726	peaks1_common	161.822	189.469		Supercontig_12.5	1891130	1892721	NCU03626		7.33827	7.56581	0.22755	gray
Supercontig_12.4	4343749	4345780	1016	-0.22752	7.34341	0.00784498	peaks1_common	150.086	175.724		Supercontig_12.4	4343748	4345780	NCU07332		7.22965	7.45717	0.22752	gray
Supercontig_12.7	3269116	3274570	2727.5	-0.22735	7.55305	0.00674301	peaks1_common	173.57	203.196		Supercontig_12.7	3269115	3274570	NCU02225		7.43937	7.66672	0.22735	gray
Supercontig_12.4	4086896	4089090	1097.5	-0.22732	7.49998	0.00658296	peaks1_common	167.303	195.855		Supercontig_12.4	4086895	4089090	NCU10458		7.38632	7.61364	0.22732	gray
Supercontig_12.4	5407606	5409911	1153	-0.22702	7.49305	0.00710887	peaks1_common	166.519	194.896		Supercontig_12.4	5407605	5409911	NCU05302		7.37954	7.60656	0.22702	gray
Supercontig_12.5	1240122	1242530	1204.5	-0.22686	7.69545	0.00571932	peaks1_common	191.609	224.237		Supercontig_12.5	1240121	1242530	NCU04672		7.58202	7.80888	0.22686	gray
Supercontig_12.2	2092609	2097550	2471	-0.22682	7.27379	0.00895992	peaks1_common	143.05	167.405		Supercontig_12.2	2092608	2097550	NCU06738		7.16038	7.3872	0.22682	gray
Supercontig_12.7	3869272	3872287	1508	-0.22677	7.53967	0.0066986	peaks1_common	172.002	201.279		Supercontig_12.7	3869271	3872287	NCU05801		7.42628	7.65305	0.22677	gray
Supercontig_12.6	3824604	3827428	1412.5	-0.22671	10.1008	9.49705e-06	peaks1_common	1015.1	1187.83		Supercontig_12.6	3824603	3827428	NCU05074		9.98741	10.2141	0.22671	gray
Supercontig_12.4	2492352	2495592	1620.5	-0.22648	7.53294	0.00667601	peaks1_common	171.219	200.322		Supercontig_12.4	2492351	2495592	NCU08298		7.4197	7.64618	0.22648	gray
Supercontig_12.3	2649271	2652106	1418	-0.22624	7.42319	0.00747664	peaks1_common	158.69	185.633		Supercontig_12.3	2649270	2652106	NCU00110		7.31007	7.53631	0.22624	gray
Supercontig_12.5	1835177	1839458	2141	-0.22619	7.52617	0.00665315	peaks1_common	170.435	199.365		Supercontig_12.5	1835176	1839458	NCU03611		7.41308	7.63927	0.22619	gray
Supercontig_12.5	4942357	4944707	1175.5	-0.22608	7.47208	0.00703913	peaks1_common	164.169	192.021		Supercontig_12.5	4942356	4944707	NCU04130		7.35904	7.58512	0.22608	gray
Supercontig_12.1	3409476	3413969	2247	-0.22589	7.51937	0.00717603	peaks1_common	169.651	198.406		Supercontig_12.1	3409475	3413969	NCU02747		7.40643	7.63231	0.22589	gray
Supercontig_12.1	2565685	2568925	1620.5	-0.22576	7.46502	0.00701529	peaks1_common	163.386	191.062		Supercontig_12.1	2565684	2568925	NCU02511		7.35214	7.5779	0.22576	gray
Supercontig_12.1	8217078	8220083	1503	-0.22558	7.51254	0.00715392	peaks1_common	168.868	197.448		Supercontig_12.1	8217077	8220083	NCU00499		7.39975	7.62533	0.22558	gray
Supercontig_12.5	2429171	2434265	2547.5	-0.22558	7.51254	0.00715392	peaks1_common	168.868	197.448		Supercontig_12.5	2429170	2434265	NCU03792		7.39975	7.62533	0.22558	gray
Supercontig_12.6	2342171	2345992	1911	-0.22497	7.49878	0.00658296	peaks1_common	167.3	195.533		Supercontig_12.6	2342170	2345992	NCU03973		7.3863	7.61126	0.22497	gray
Supercontig_12.7	1299136	1300688	776.5	-0.22451	7.97325	0.00363721	peaks1_common	232.485	271.631		Supercontig_12.7	1299135	1300688	NCU10019		7.861	8.08551	0.22451	gray
Supercontig_12.4	4352332	4353644	656.5	-0.22378	7.6212	0.00595432	peaks1_common	182.191	212.761		Supercontig_12.4	4352331	4353644	NCU16844		7.50931	7.73309	0.22378	gray
Supercontig_12.1	6890510	6892949	1220	-0.22368	7.47086	0.00703913	peaks1_common	164.167	191.699		Supercontig_12.1	6890509	6892949	NCU00876		7.35902	7.5827	0.22368	gray
Supercontig_12.4	4375539	4377884	1173	-0.22353	7.66391	0.00607977	peaks1_common	187.682	219.135		Supercontig_12.4	4375538	4377884	NCU07320		7.55215	7.77567	0.22353	gray
Supercontig_12.1	8458041	8459859	909.5	-0.22335	7.4638	0.00701529	peaks1_common	163.384	190.742		Supercontig_12.1	8458040	8459859	NCU03009		7.35213	7.57548	0.22335	gray
Supercontig_12.1	4417208	4419689	1241	-0.22322	7.60844	0.00640064	peaks1_common	180.622	210.847		Supercontig_12.1	4417207	4419689	NCU03067		7.49683	7.72005	0.22322	gray
Supercontig_12.2	1744851	1746892	1021	-0.22293	7.50449	0.00713154	peaks1_common	168.082	196.169		Supercontig_12.2	1744850	1746892	NCU06855		7.39303	7.61596	0.22293	gray
Supercontig_12.1	636650	638312	831.5	-0.22281	7.55075	0.00674301	peaks1_common	173.567	202.553		Supercontig_12.1	636649	638312	NCU07434		7.43934	7.66216	0.22281	gray
Supercontig_12.4	2208622	2211878	1628.5	-0.2225	7.54406	0.00672093	peaks1_common	172.782	201.594		Supercontig_12.4	2208621	2211878	NCU07692		7.43281	7.65531	0.2225	gray
Supercontig_12.1	9435263	9437199	968.5	-0.22249	7.73403	0.00539991	peaks1_common	197.1	229.966		Supercontig_12.1	9435262	9437199	NCU09243		7.62278	7.84528	0.22249	gray
Supercontig_12.4	1747376	1750612	1618.5	-0.22228	7.49065	0.00765873	peaks1_common	166.515	194.253		Supercontig_12.4	1747375	1750612	NCU06594		7.37951	7.60179	0.22228	gray
Supercontig_12.5	40435	41983	774.5	-0.22224	7.68124	0.00567884	peaks1_common	190.035	221.684		Supercontig_12.5	40434	41983	NCU10292		7.57012	7.79236	0.22224	gray
Supercontig_12.1	1539599	1542181	1291.5	-0.22213	7.28709	0.00900838	peaks1_common	144.61	168.681		Supercontig_12.1	1539598	1542181	NCU10806		7.17603	7.39816	0.22213	gray
Supercontig_12.3	429337	430124	394	-0.22209	10.8093	1.54889e-07	peaks1_common	1661.46	1937.96		Supercontig_12.3	429336	430124	NCU05671		10.6982	10.9203	0.22209	gray
Supercontig_12.3	2977148	2983556	3204.5	-0.22206	7.58258	0.00631438	peaks1_common	177.485	207.018		Supercontig_12.3	2977147	2983556	NCU00199		7.47155	7.69361	0.22206	gray
Supercontig_12.3	4693312	4696488	1588.5	-0.222	9.67825	7.85484e-05	peaks1_common	758.629	884.826		Supercontig_12.3	4693311	4696488	NCU08226		9.56725	9.78925	0.222	gray
Supercontig_12.1	1577097	1579064	984	-0.22197	7.67513	0.00565832	peaks1_common	189.249	220.726		Supercontig_12.1	1577096	1579064	NCU02043		7.56414	7.78611	0.22197	gray
Supercontig_12.3	4711338	4716085	2374	-0.22182	8.89709	0.000735868	peaks1_common	441.473	514.847		Supercontig_12.3	4711337	4716085	NCU08230		8.78618	9.008	0.22182	gray
Supercontig_12.1	5416503	5419355	1426.5	-0.22176	7.57604	0.0068077	peaks1_common	176.7	206.06		Supercontig_12.1	5416502	5419355	NCU09123		7.46516	7.68692	0.22176	gray
Supercontig_12.2	253287	253853	283.5	-0.22173	7.7621	0.00547681	peaks1_common	201.026	234.422		Supercontig_12.2	253286	253853	NCU10342		7.65123	7.87297	0.22173	gray
Supercontig_12.6	1247025	1250314	1645	-0.22162	7.47668	0.00761506	peaks1_common	164.948	192.337		Supercontig_12.6	1247024	1250314	NCU05635		7.36587	7.58749	0.22162	gray
Supercontig_12.4	4577531	4578760	615	-0.22133	7.61373	0.00640064	peaks1_common	181.404	211.483		Supercontig_12.4	4577530	4578760	NCU07267		7.50307	7.7244	0.22133	gray
Supercontig_12.5	5150381	5154171	1895.5	-0.22128	7.46964	0.00759277	peaks1_common	164.165	191.378		Supercontig_12.5	5150380	5154171	NCU04190		7.359	7.58028	0.22128	gray
Supercontig_12.3	2989948	2992927	1490	-0.22124	7.51701	0.00717603	peaks1_common	169.647	197.763		Supercontig_12.3	2989947	2992927	NCU00202		7.40639	7.62763	0.22124	gray
Supercontig_12.7	756592	757945	677	-0.22123	7.70436	0.00573927	peaks1_common	193.172	225.186		Supercontig_12.7	756591	757945	NCU06915		7.59375	7.81497	0.22123	gray
Supercontig_12.1	5299265	5301649	1192.5	-0.22093	7.46257	0.00757017	peaks1_common	163.382	190.419		Supercontig_12.1	5299264	5301649	NCU03320		7.3521	7.57303	0.22093	gray
Supercontig_12.5	5006500	5008608	1054.5	-0.22093	7.46257	0.00757017	peaks1_common	163.382	190.419		Supercontig_12.5	5006499	5008608	NCU04149		7.3521	7.57303	0.22093	gray
Supercontig_12.5	5619353	5622538	1593	-0.22081	7.36238	0.00789568	peaks1_common	152.427	177.637		Supercontig_12.5	5619352	5622538	NCU04325		7.25198	7.47278	0.22081	gray
Supercontig_12.7	3265314	3267195	941	-0.22058	7.50329	0.00713154	peaks1_common	168.079	195.847		Supercontig_12.7	3265313	3267195	NCU02227		7.393	7.61358	0.22058	gray
Supercontig_12.3	3157964	3159174	605.5	-0.22053	7.40599	0.00801606	peaks1_common	157.12	183.07		Supercontig_12.3	3157963	3159174	NCU00245		7.29573	7.51625	0.22053	gray
Supercontig_12.1	4278717	4281906	1595	-0.22042	7.35476	0.00851776	peaks1_common	151.645	176.677		Supercontig_12.1	4278716	4281906	NCU09315		7.24455	7.46497	0.22042	gray
Supercontig_12.1	5885739	5892419	3340.5	-0.22022	7.5429	0.00724069	peaks1_common	172.78	201.273		Supercontig_12.1	5885738	5892419	NCU09219		7.43279	7.65301	0.22022	gray
Supercontig_12.4	852769	855527	1379.5	-0.22022	7.5429	0.00724069	peaks1_common	172.78	201.273		Supercontig_12.4	852768	855527	NCU04954		7.43279	7.65301	0.22022	gray
Supercontig_12.1	3545195	3550304	2555	-0.22016	7.3986	0.00799269	peaks1_common	156.337	182.112		Supercontig_12.1	3545194	3550304	NCU09370		7.28852	7.50868	0.22016	gray
Supercontig_12.2	3505556	3508674	1559.5	-0.22003	7.3471	0.0084944	peaks1_common	150.862	175.718		Supercontig_12.2	3505555	3508674	NCU08484		7.23708	7.45711	0.22003	gray
Supercontig_12.1	8553862	8555928	1033.5	-0.21991	7.48944	0.00765873	peaks1_common	166.512	193.93		Supercontig_12.1	8553861	8555928	NCU02966		7.37949	7.5994	0.21991	gray
Supercontig_12.2	3259232	3263375	2072	-0.2199	7.53618	0.00721941	peaks1_common	171.996	200.315		Supercontig_12.2	3259231	3263375	NCU01499		7.42623	7.64613	0.2199	gray
Supercontig_12.3	4489720	4492047	1164	-0.2199	7.53618	0.00721941	peaks1_common	171.996	200.315		Supercontig_12.3	4489719	4492047	NCU07528		7.42623	7.64613	0.2199	gray
Supercontig_12.3	4800161	4800732	286	-0.21945	11.1084	1.72718e-08	peaks1_common	2046.09	2382.24		Supercontig_12.3	4800160	4800732	NCU16703		10.9987	11.2181	0.21945	gray
Supercontig_12.2	2190292	2194051	1880	-0.2194	7.3837	0.00858562	peaks1_common	154.772	180.193		Supercontig_12.2	2190291	2194051	NCU01843		7.274	7.4934	0.2194	gray
Supercontig_12.5	1742376	1743656	640.5	-0.2194	7.3837	0.00858562	peaks1_common	154.772	180.193		Supercontig_12.5	1742375	1743656	NCU03589		7.274	7.4934	0.2194	gray
Supercontig_12.2	1601768	1603754	993.5	-0.21922	7.47546	0.00761506	peaks1_common	164.946	192.014		Supercontig_12.2	1601767	1603754	NCU05426		7.36585	7.58507	0.21922	gray
Supercontig_12.2	355049	356515	733.5	-0.21922	7.56834	0.00678638	peaks1_common	175.914	204.783		Supercontig_12.2	355048	356515	NCU03528		7.45873	7.67795	0.21922	gray
Supercontig_12.1	9337207	9338673	733.5	-0.21893	8.04192	0.00381929	peaks1_common	244.291	284.323		Supercontig_12.1	9337206	9338673	NCU11053		7.93246	8.15139	0.21893	gray
Supercontig_12.2	1508604	1511057	1227	-0.21887	7.46842	0.00759277	peaks1_common	164.163	191.056		Supercontig_12.2	1508603	1511057	NCU16534		7.35899	7.57786	0.21887	gray
Supercontig_12.2	750983	752621	819.5	-0.21875	7.73787	0.00583626	peaks1_common	197.882	230.28		Supercontig_12.2	750982	752621	NCU03428		7.62849	7.84724	0.21875	gray
Supercontig_12.4	5735987	5741245	2629.5	-0.21862	7.36864	0.00854075	peaks1_common	153.206	178.274		Supercontig_12.4	5735986	5741245	NCU05211		7.25933	7.47795	0.21862	gray
Supercontig_12.5	5389302	5396825	3762	-0.21862	7.36864	0.00854075	peaks1_common	153.206	178.274		Supercontig_12.5	5389301	5396825	NCU04258		7.25933	7.47795	0.21862	gray
Supercontig_12.1	7088949	7091552	1302	-0.21858	7.5551	0.00674301	peaks1_common	174.346	202.867		Supercontig_12.1	7088948	7091552	NCU00809		7.44581	7.66439	0.21858	gray
Supercontig_12.2	3060291	3062031	870.5	-0.21847	7.64313	0.00601799	peaks1_common	185.323	215.623		Supercontig_12.2	3060290	3062031	NCU01568		7.5339	7.75236	0.21847	gray
Supercontig_12.1	4803481	4807513	2016.5	-0.2184	7.41207	0.00803908	peaks1_common	157.9	183.708		Supercontig_12.1	4803480	4807513	NCU03175		7.30287	7.52127	0.2184	gray
Supercontig_12.3	2256790	2260238	1724.5	-0.2184	7.41207	0.00803908	peaks1_common	157.9	183.708		Supercontig_12.3	2256789	2260238	NCU00007		7.30287	7.52127	0.2184	gray
Supercontig_12.3	983811	985578	884	-0.21835	7.8585	0.00496119	peaks1_common	215.169	250.328		Supercontig_12.3	983810	985578	NCU07822		7.74933	7.96767	0.21835	gray
Supercontig_12.1	4850793	4853293	1250.5	-0.21826	7.54843	0.0072617	peaks1_common	173.561	201.909		Supercontig_12.1	4850792	4853293	NCU03188		7.4393	7.65756	0.21826	gray
Supercontig_12.6	791484	796417	2467	-0.21823	7.5021	0.00713154	peaks1_common	168.078	195.526		Supercontig_12.6	791483	796417	NCU04782		7.39299	7.61122	0.21823	gray
Supercontig_12.1	9770841	9772169	664.5	-0.21815	11.2071	7.75588e-09	peaks1_common	2191.96	2549.78		Supercontig_12.1	9770840	9772169	NCU10031		11.098	11.3162	0.21815	gray
Supercontig_12.6	1120913	1121223	155.5	-0.21793	7.58684	0.00682876	peaks1_common	178.264	207.333		Supercontig_12.6	1120912	1121223	NCU10278		7.47787	7.6958	0.21793	gray
Supercontig_12.2	79724	82693	1485	-0.21786	8.05527	0.00386294	peaks1_common	246.653	286.859		Supercontig_12.2	79723	82693	NCU09602		7.94634	8.1642	0.21786	gray
Supercontig_12.5	5721048	5724160	1556.5	-0.2178	7.67301	0.00609995	peaks1_common	189.245	220.084		Supercontig_12.5	5721047	5724160	NCU08925		7.56411	7.78191	0.2178	gray
Supercontig_12.4	2953113	2956776	1832	-0.21779	7.44708	0.00812782	peaks1_common	161.813	188.181		Supercontig_12.4	2953112	2956776	NCU06312		7.33818	7.55598	0.21779	gray
Supercontig_12.4	4811271	4813719	1224.5	-0.21779	7.44708	0.00812782	peaks1_common	161.813	188.181		Supercontig_12.4	4811270	4813719	NCU06992		7.33818	7.55598	0.21779	gray
Supercontig_12.3	1185564	1188434	1435.5	-0.21763	7.39731	0.00799269	peaks1_common	156.335	181.789		Supercontig_12.3	1185563	1188434	NCU07871		7.28849	7.50612	0.21763	gray
Supercontig_12.5	3136386	3140959	2287	-0.21753	7.48824	0.00765873	peaks1_common	166.511	193.609		Supercontig_12.5	3136385	3140959	NCU01176		7.37947	7.597	0.21753	gray
Supercontig_12.2	2988136	2996985	4425	-0.21726	7.52826	0.00719785	peaks1_common	171.211	199.037		Supercontig_12.2	2988135	2996985	NCU01597		7.41963	7.63689	0.21726	gray
Supercontig_12.7	2514368	2517039	1336	-0.21719	7.83131	0.00489047	peaks1_common	211.236	245.555		Supercontig_12.7	2514367	2517039	NCU02430		7.72271	7.9399	0.21719	gray
Supercontig_12.7	1951722	1953539	909	-0.21697	7.56719	0.00730293	peaks1_common	175.911	204.46		Supercontig_12.7	1951721	1953539	NCU06057		7.45871	7.67568	0.21697	gray
Supercontig_12.1	1033949	1037601	1826.5	-0.21684	7.3824	0.00858562	peaks1_common	154.77	179.871		Supercontig_12.1	1033948	1037601	NCU02165		7.27398	7.49082	0.21684	gray
Supercontig_12.6	1513883	1516922	1520	-0.21666	7.60511	0.00689048	peaks1_common	180.616	209.883		Supercontig_12.6	1513882	1516922	NCU05560		7.49678	7.71344	0.21666	gray
Supercontig_12.2	3553400	3555071	836	-0.21664	7.56058	0.00676482	peaks1_common	175.127	203.502		Supercontig_12.2	3553399	3555071	NCU08469		7.45226	7.6689	0.21664	gray
Supercontig_12.4	5345909	5351129	2610.5	-0.21657	7.51464	0.00772203	peaks1_common	169.643	197.119		Supercontig_12.4	5345908	5351129	NCU05317		7.40636	7.62293	0.21657	gray
Supercontig_12.4	4103103	4104868	883	-0.21643	7.37488	0.00856336	peaks1_common	153.987	178.911		Supercontig_12.4	4103102	4104868	NCU10273		7.26667	7.48309	0.21643	gray
Supercontig_12.5	2458748	2461472	1362.5	-0.21643	7.37488	0.00856336	peaks1_common	153.987	178.911		Supercontig_12.5	2458747	2461472	NCU03801		7.26667	7.48309	0.21643	gray
Supercontig_12.1	6509214	6510877	832	-0.21634	7.64205	0.00648323	peaks1_common	185.321	215.302		Supercontig_12.1	6509213	6510877	NCU00981		7.53388	7.75022	0.21634	gray
Supercontig_12.7	2932289	2934977	1344.5	-0.21631	7.55395	0.00674301	peaks1_common	174.344	202.546		Supercontig_12.7	2932288	2934977	NCU02321		7.44579	7.66211	0.21631	gray
Supercontig_12.7	1776093	1778522	1215	-0.21621	7.72508	0.00579802	peaks1_common	196.308	228.047		Supercontig_12.7	1776092	1778522	NCU06108		7.61698	7.83318	0.21621	gray
Supercontig_12.5	172745	176668	1962	-0.21609	7.46011	0.00757017	peaks1_common	163.377	189.776		Supercontig_12.5	172744	176668	NCU08847		7.35206	7.56816	0.21609	gray
Supercontig_12.1	7209435	7213099	1832.5	-0.21574	7.22011	0.00953748	peaks1_common	138.356	160.673		Supercontig_12.1	7209434	7213099	NCU00777		7.11224	7.32798	0.21574	gray
Supercontig_12.6	2424032	2428176	2072.5	-0.21573	7.62948	0.00695007	peaks1_common	183.752	213.389		Supercontig_12.6	2424031	2428176	NCU03947		7.52161	7.73734	0.21573	gray
Supercontig_12.3	2116850	2120498	1824.5	-0.21571	7.45299	0.00814919	peaks1_common	162.595	188.817		Supercontig_12.3	2116849	2120498	NCU06264		7.34514	7.56085	0.21571	gray
Supercontig_12.2	958864	963452	2294.5	-0.21564	7.54058	0.00724069	peaks1_common	172.776	200.631		Supercontig_12.2	958863	963452	NCU03364		7.43276	7.6484	0.21564	gray
Supercontig_12.6	1022784	1026751	1984	-0.21561	7.35973	0.00851776	peaks1_common	152.422	176.991		Supercontig_12.6	1022783	1026751	NCU04841		7.25192	7.46753	0.21561	gray
Supercontig_12.1	6956051	6957037	493.5	-0.21551	7.49398	0.00765873	peaks1_common	167.292	194.245		Supercontig_12.1	6956050	6957037	NCU00852		7.38622	7.60173	0.21551	gray
Supercontig_12.2	1987258	1989097	920	-0.21538	7.70724	0.00619782	peaks1_common	193.951	225.179		Supercontig_12.2	1987257	1989097	NCU06771		7.59955	7.81493	0.21538	gray
Supercontig_12.1	4588557	4591644	1544	-0.21529	7.53384	0.00721941	peaks1_common	171.992	199.672		Supercontig_12.1	4588556	4591644	NCU03108		7.42619	7.64148	0.21529	gray
Supercontig_12.2	1961863	1965266	1702	-0.21515	7.48703	0.00823154	peaks1_common	166.509	193.288		Supercontig_12.2	1961862	1965266	NCU06777		7.37945	7.5946	0.21515	gray
Supercontig_12.3	581471	582914	722	-0.21513	8.02597	0.00407908	peaks1_common	241.923	280.826		Supercontig_12.3	581470	582914	NCU05706		7.91841	8.13354	0.21513	gray
Supercontig_12.3	3046349	3053065	3358.5	-0.21509	7.39602	0.00860751	peaks1_common	156.333	181.467		Supercontig_12.3	3046348	3053065	NCU00219		7.28848	7.50356	0.21509	gray
Supercontig_12.4	5662631	5664417	893.5	-0.21508	7.82485	0.00524725	peaks1_common	210.447	244.28		Supercontig_12.4	5662630	5664417	NCU05236		7.71731	7.93239	0.21508	gray
Supercontig_12.1	1543429	1548853	2712.5	-0.21495	7.43864	0.00810613	peaks1_common	161.028	186.899		Supercontig_12.1	1543428	1548853	NCU02051		7.33116	7.54611	0.21495	gray
Supercontig_12.1	764870	766051	591	-0.21495	7.52708	0.00719785	peaks1_common	171.208	198.715		Supercontig_12.1	764869	766051	NCU09074		7.41961	7.63456	0.21495	gray
Supercontig_12.3	4450224	4452459	1118	-0.21483	7.81933	0.00564022	peaks1_common	209.661	243.326		Supercontig_12.3	4450223	4452459	NCU07537		7.71191	7.92675	0.21483	gray
Supercontig_12.3	5247940	5248821	441	-0.21476	11.3845	2.07285e-09	peaks1_common	2481.66	2879.99		Supercontig_12.3	5247939	5248821	NCU10427		11.2771	11.4919	0.21476	gray
Supercontig_12.6	2316586	2319511	1463	-0.21468	7.77534	0.00551426	peaks1_common	203.375	236.006		Supercontig_12.6	2316585	2319511	NCU03978		7.668	7.88268	0.21468	gray
Supercontig_12.1	8727314	8728636	661.5	-0.21447	7.60399	0.00689048	peaks1_common	180.613	209.561		Supercontig_12.1	8727313	8728636	NCU16474		7.49675	7.71122	0.21447	gray
Supercontig_12.7	1647645	1652816	2586	-0.21436	7.29092	0.00900838	peaks1_common	145.386	168.675		Supercontig_12.7	1647644	1652816	NCU06144		7.18374	7.3981	0.21436	gray
Supercontig_12.6	3947104	3949356	1126.5	-0.21406	7.88244	0.00502976	peaks1_common	219.095	254.138		Supercontig_12.6	3947103	3949356	NCU05044		7.77541	7.98947	0.21406	gray
Supercontig_12.7	2812467	2817461	2497.5	-0.21404	7.55279	0.0072617	peaks1_common	174.341	202.224		Supercontig_12.7	2812466	2817461	NCU10066		7.44577	7.65981	0.21404	gray
Supercontig_12.7	2490608	2492335	864	-0.21391	7.71813	0.0062356	peaks1_common	195.52	226.77		Supercontig_12.7	2490607	2492335	NCU02435		7.61118	7.82509	0.21391	gray
Supercontig_12.7	3253828	3256189	1181	-0.2139	7.28291	0.00969691	peaks1_common	144.604	167.714		Supercontig_12.7	3253827	3256189	NCU02232		7.17596	7.38986	0.2139	gray
Supercontig_12.2	1837210	1844886	3838.5	-0.21385	7.37357	0.00856336	peaks1_common	153.985	178.588		Supercontig_12.2	1837209	1844886	NCU06832		7.26664	7.48049	0.21385	gray
Supercontig_12.5	3251609	3254017	1204.5	-0.21385	7.37357	0.00856336	peaks1_common	153.985	178.588		Supercontig_12.5	3251608	3254017	NCU01210		7.26664	7.48049	0.21385	gray
Supercontig_12.6	2758781	2760742	981	-0.21382	7.87713	0.00501281	peaks1_common	218.308	253.184		Supercontig_12.6	2758780	2760742	NCU03847		7.77022	7.98404	0.21382	gray
Supercontig_12.6	2434623	2437065	1221.5	-0.21377	7.41685	0.00867108	peaks1_common	158.679	184.022		Supercontig_12.6	2434622	2437065	NCU03944		7.30997	7.52373	0.21377	gray
Supercontig_12.1	5660914	5662467	777	-0.21369	7.54612	0.00780246	peaks1_common	173.558	201.267		Supercontig_12.1	5660913	5662467	NCU08350		7.43927	7.65296	0.21369	gray
Supercontig_12.2	4219386	4223547	2081	-0.21362	7.67089	0.00656229	peaks1_common	189.241	219.443		Supercontig_12.2	4219385	4223547	NCU09355		7.56408	7.7777	0.21362	gray
Supercontig_12.2	230862	233611	1375	-0.21337	7.40952	0.00865024	peaks1_common	157.896	183.064		Supercontig_12.2	230861	233611	NCU03559		7.30284	7.51621	0.21337	gray
Supercontig_12.1	8927389	8929868	1240	-0.21301	7.31331	0.00975875	peaks1_common	147.729	171.233		Supercontig_12.1	8927388	8929868	NCU02846		7.2068	7.41982	0.21301	gray
Supercontig_12.1	1570281	1573326	1523	-0.21296	7.40214	0.00862905	peaks1_common	157.113	182.104		Supercontig_12.1	1570280	1573326	NCU02046		7.29566	7.50862	0.21296	gray
Supercontig_12.3	2594535	2599205	2335.5	-0.21288	7.44459	0.00812782	peaks1_common	161.809	187.537		Supercontig_12.3	2594534	2599205	NCU00095		7.33815	7.55103	0.21288	gray
Supercontig_12.2	1552217	1556305	2044.5	-0.2128	7.57149	0.00732316	peaks1_common	176.692	204.774		Supercontig_12.2	1552216	1556305	NCU05411		7.46509	7.67789	0.2128	gray
Supercontig_12.4	4697784	4700541	1379	-0.21226	7.5191	0.00772203	peaks1_common	170.422	197.434		Supercontig_12.4	4697783	4700541	NCU06969		7.41297	7.62523	0.21226	gray
Supercontig_12.1	1959628	1961938	1155.5	-0.21211	7.55828	0.00728245	peaks1_common	175.123	202.859		Supercontig_12.1	1959627	1961938	NCU01935		7.45223	7.66433	0.21211	gray
Supercontig_12.6	3965602	3966845	622	-0.21209	7.83941	0.00530011	peaks1_common	212.802	246.502		Supercontig_12.6	3965601	3966845	NCU05040		7.73336	7.94546	0.21209	gray
Supercontig_12.4	1379516	1381507	996	-0.21201	7.4718	0.00819099	peaks1_common	164.94	191.05		Supercontig_12.4	1379515	1381507	NCU07910		7.36579	7.57781	0.21201	gray
Supercontig_12.7	3231591	3234441	1425.5	-0.212	7.25042	0.00960851	peaks1_common	141.477	163.871		Supercontig_12.7	3231590	3234441	NCU02236		7.14442	7.35642	0.212	gray
Supercontig_12.6	2421155	2423594	1220	-0.21152	7.5054	0.00770122	peaks1_common	168.855	195.518		Supercontig_12.6	2421154	2423594	NCU03948		7.39964	7.61116	0.21152	gray
Supercontig_12.3	3496810	3499135	1163	-0.21127	7.37226	0.00920626	peaks1_common	153.983	178.267		Supercontig_12.3	3496809	3499135	NCU00337		7.26663	7.47789	0.21127	gray
Supercontig_12.1	5601825	5603828	1002	-0.21127	7.41558	0.00867108	peaks1_common	158.677	183.701		Supercontig_12.1	5601824	5603828	NCU08368		7.30995	7.52121	0.21127	gray
Supercontig_12.3	3747790	3751837	2024	-0.21115	7.4985	0.00768012	peaks1_common	168.071	194.56		Supercontig_12.3	3747789	3751837	NCU00406		7.39293	7.60408	0.21115	gray
Supercontig_12.7	3277705	3281069	1682.5	-0.21085	7.40824	0.00865024	peaks1_common	157.894	182.742		Supercontig_12.7	3277704	3281069	NCU02223		7.30282	7.51366	0.21085	gray
Supercontig_12.1	7072683	7075986	1652	-0.21082	7.4505	0.00875112	peaks1_common	162.589	188.172		Supercontig_12.1	7072682	7075986	NCU00814		7.34509	7.55591	0.21082	gray
Supercontig_12.7	2109901	2111764	932	-0.21075	7.84935	0.00531743	peaks1_common	214.372	248.091		Supercontig_12.7	2109900	2111764	NCU02459		7.74398	7.95473	0.21075	gray
Supercontig_12.2	2173810	2178532	2361.5	-0.21075	7.61458	0.00691058	peaks1_common	182.178	210.833		Supercontig_12.2	2173809	2178532	NCU11426		7.50921	7.71995	0.21075	gray
Supercontig_12.5	4549414	4551590	1088.5	-0.21043	7.40085	0.00862905	peaks1_common	157.11	181.782		Supercontig_12.5	4549413	4551590	NCU09547		7.29563	7.50606	0.21043	gray
Supercontig_12.6	3164184	3167004	1410.5	-0.21042	7.44334	0.0087316	peaks1_common	161.807	187.215		Supercontig_12.6	3164183	3167004	NCU05991		7.33813	7.54855	0.21042	gray
Supercontig_12.1	2029768	2031216	724.5	-0.21019	7.87529	0.00501281	peaks1_common	218.304	252.543		Supercontig_12.1	2029767	2031216	NCU11200		7.7702	7.98039	0.21019	gray
Supercontig_12.6	2200589	2202337	874.5	-0.21007	7.60176	0.00740154	peaks1_common	180.609	208.918		Supercontig_12.6	2200588	2202337	NCU04009		7.49673	7.70679	0.21007	gray
Supercontig_12.6	2154870	2160629	2880	-0.21001	7.43613	0.00871176	peaks1_common	161.023	186.255		Supercontig_12.6	2154869	2160629	NCU04021		7.33113	7.54114	0.21001	gray
Supercontig_12.1	5838082	5841713	1816	-0.21	7.39343	0.00860751	peaks1_common	156.328	180.822		Supercontig_12.1	5838081	5841713	NCU09207		7.28843	7.49843	0.21	gray
Supercontig_12.5	157573	159347	887.5	-0.20999	7.4776	0.00821142	peaks1_common	165.72	191.685		Supercontig_12.5	157572	159347	NCU08849		7.3726	7.58259	0.20999	gray
Supercontig_12.3	2306105	2309826	1861	-0.20959	7.47057	0.00819099	peaks1_common	164.937	190.727		Supercontig_12.3	2306104	2309826	NCU00018		7.36578	7.57536	0.20959	gray
Supercontig_12.3	2527139	2528751	806.5	-0.20925	7.62618	0.00745776	peaks1_common	183.744	212.424		Supercontig_12.3	2527138	2528751	NCU00075		7.52155	7.73081	0.20925	gray
Supercontig_12.2	2634938	2640617	2840	-0.20919	7.4635	0.00817025	peaks1_common	164.154	189.768		Supercontig_12.2	2634937	2640617	NCU01722		7.35891	7.56809	0.20919	gray
Supercontig_12.4	4222416	4225865	1725	-0.20917	7.5042	0.0082709	peaks1_common	168.852	195.197		Supercontig_12.4	4222415	4225865	NCU08650		7.39962	7.60879	0.20917	gray
Supercontig_12.5	322740	326767	2014	-0.20917	7.5042	0.0082709	peaks1_common	168.852	195.197		Supercontig_12.5	322739	326767	NCU07779		7.39962	7.60879	0.20917	gray
Supercontig_12.1	4208122	4209245	562	-0.20893	7.69812	0.00663797	peaks1_common	193.16	223.261		Supercontig_12.1	4208121	4209245	NCU09330		7.59366	7.80258	0.20893	gray
Supercontig_12.1	9074031	9077852	1911	-0.20878	7.4973	0.00825137	peaks1_common	168.069	194.239		Supercontig_12.1	9074030	9077852	NCU02800		7.39291	7.60169	0.20878	gray
Supercontig_12.5	207349	209381	1016.5	-0.20855	7.95041	0.00485525	peaks1_common	230.103	265.89		Supercontig_12.5	207348	209381	NCU07811		7.84613	8.05469	0.20855	gray
Supercontig_12.5	6229405	6230566	581	-0.20855	10.8434	4.41194e-07	peaks1_common	1709.25	1975.08		Supercontig_12.5	6229404	6230566	NCU07212		10.7391	10.9477	0.20855	gray
Supercontig_12.1	2419527	2422605	1539.5	-0.20836	7.53032	0.0077628	peaks1_common	171.985	198.707		Supercontig_12.1	2419526	2422605	NCU02470		7.42614	7.6345	0.20836	gray
Supercontig_12.5	5857726	5862295	2285	-0.2083	7.56921	0.00785994	peaks1_common	176.688	204.132		Supercontig_12.5	5857725	5862295	NCU08966		7.46506	7.67336	0.2083	gray
Supercontig_12.7	860788	865053	2133	-0.20824	7.97957	0.00493263	peaks1_common	234.826	271.29		Supercontig_12.7	860787	865053	NCU06946		7.87545	8.08369	0.20824	gray
Supercontig_12.6	1285105	1287691	1293.5	-0.20823	7.36337	0.00918582	peaks1_common	153.198	176.985		Supercontig_12.6	1285104	1287691	NCU05623		7.25925	7.46748	0.20823	gray
Supercontig_12.1	4971568	4973606	1019.5	-0.20794	7.56261	0.00784104	peaks1_common	175.903	203.175		Supercontig_12.1	4971567	4973606	NCU03226		7.45864	7.66658	0.20794	gray
Supercontig_12.4	4675150	4678788	1819.5	-0.20794	7.56261	0.00784104	peaks1_common	175.903	203.175		Supercontig_12.4	4675149	4678788	NCU06963		7.45864	7.66658	0.20794	gray
Supercontig_12.7	3150895	3152466	786	-0.20777	7.35575	0.00916501	peaks1_common	152.415	176.025		Supercontig_12.7	3150894	3152466	NCU02259		7.25186	7.45963	0.20777	gray
Supercontig_12.4	3683097	3689591	3247.5	-0.20759	7.51673	0.00772203	peaks1_common	170.418	196.792		Supercontig_12.4	3683096	3689591	NCU04350		7.41294	7.62052	0.20759	gray
Supercontig_12.1	741884	746951	2534	-0.20758	7.47638	0.00880778	peaks1_common	165.718	191.363		Supercontig_12.1	741883	746951	NCU09068		7.37259	7.58017	0.20758	gray
Supercontig_12.6	3132024	3134988	1482.5	-0.20757	7.55598	0.00782189	peaks1_common	175.119	202.218		Supercontig_12.6	3132023	3134988	NCU05999		7.4522	7.65976	0.20757	gray
Supercontig_12.1	4130793	4134687	1947.5	-0.207	7.38467	0.00924605	peaks1_common	155.543	179.541		Supercontig_12.1	4130792	4134687	NCU09812		7.28117	7.48817	0.207	gray
Supercontig_12.2	2733413	2736971	1779.5	-0.20699	7.66153	0.00654285	peaks1_common	188.45	217.523		Supercontig_12.2	2733412	2736971	NCU01678		7.55803	7.76503	0.20699	gray
Supercontig_12.6	1194407	1196465	1029.5	-0.20699	7.66153	0.00654285	peaks1_common	188.45	217.523		Supercontig_12.6	1194406	1196465	NCU05653		7.55803	7.76503	0.20699	gray
Supercontig_12.5	4313772	4316735	1482	-0.20684	7.3404	0.00981698	peaks1_common	150.851	174.106		Supercontig_12.5	4313771	4316735	NCU06697		7.23698	7.44382	0.20684	gray
Supercontig_12.1	1597095	1598324	615	-0.20681	7.54262	0.00836424	peaks1_common	173.551	200.301		Supercontig_12.1	1597094	1598324	NCU02037		7.43922	7.64603	0.20681	gray
Supercontig_12.1	2849644	2854124	2240.5	-0.20681	7.54262	0.00836424	peaks1_common	173.551	200.301		Supercontig_12.1	2849643	2854124	NCU02594		7.43922	7.64603	0.20681	gray
Supercontig_12.2	2745996	2748761	1383	-0.20681	7.503	0.0082709	peaks1_common	168.85	194.875		Supercontig_12.2	2745995	2748761	NCU01672		7.3996	7.6064	0.20681	gray
Supercontig_12.5	2627198	2628666	734.5	-0.20681	7.503	0.0082709	peaks1_common	168.85	194.875		Supercontig_12.5	2627197	2628666	NCU11278		7.3996	7.6064	0.20681	gray
Supercontig_12.3	3969128	3970845	859	-0.20676	7.46227	0.00877032	peaks1_common	164.152	189.447		Supercontig_12.3	3969127	3970845	NCU00469		7.35889	7.56565	0.20676	gray
Supercontig_12.1	5291484	5294396	1456.5	-0.20673	7.61874	0.00743926	peaks1_common	182.959	211.147		Supercontig_12.1	5291483	5294396	NCU03318		7.51537	7.72211	0.20673	gray
Supercontig_12.5	4687108	4689654	1273.5	-0.20663	7.29472	0.00971794	peaks1_common	146.16	168.667		Supercontig_12.5	4687107	4689654	NCU01455		7.19141	7.39804	0.20663	gray
Supercontig_12.3	2701237	2707472	3118	-0.20641	7.49609	0.00825137	peaks1_common	168.066	193.917		Supercontig_12.3	2701236	2707472	NCU00124		7.39289	7.5993	0.20641	gray
Supercontig_12.1	5908531	5909613	541.5	-0.20631	7.64912	0.00700758	peaks1_common	186.88	215.609		Supercontig_12.1	5908530	5909613	NCU09225		7.54596	7.75227	0.20631	gray
Supercontig_12.4	4340022	4343331	1655	-0.20628	7.75988	0.00634442	peaks1_common	201.794	232.812		Supercontig_12.4	4340021	4343331	NCU07333		7.65674	7.86302	0.20628	gray
Supercontig_12.1	2345343	2346397	527.5	-0.20579	7.714	0.00716836	peaks1_common	195.511	225.486		Supercontig_12.1	2345342	2346397	NCU09970		7.61111	7.8169	0.20579	gray
Supercontig_12.2	455962	458715	1377	-0.20567	7.56145	0.00784104	peaks1_common	175.9	202.852		Supercontig_12.2	455961	458715	NCU03504		7.45862	7.66428	0.20567	gray
Supercontig_12.7	3538191	3542376	2093	-0.20566	7.59952	0.00793293	peaks1_common	180.605	208.276		Supercontig_12.7	3538190	3542376	NCU08148		7.49669	7.70235	0.20566	gray
Supercontig_12.7	1494879	1497668	1395	-0.20562	7.2787	0.0104095	peaks1_common	144.597	166.746		Supercontig_12.7	1494878	1497668	NCU04545		7.17589	7.38151	0.20562	gray
Supercontig_12.2	1496319	1500369	2025.5	-0.20555	7.67276	0.00706309	peaks1_common	190.017	219.114		Supercontig_12.2	1496318	1500369	NCU05389		7.56998	7.77554	0.20555	gray
Supercontig_12.5	5633993	5636551	1279.5	-0.20539	7.31706	0.0104792	peaks1_common	148.505	171.226		Supercontig_12.5	5633992	5636551	NCU04328		7.21436	7.41976	0.20539	gray
Supercontig_12.1	2686486	2689633	1574	-0.20529	7.55482	0.00782189	peaks1_common	175.117	201.896		Supercontig_12.1	2686485	2689633	NCU02546		7.45218	7.65747	0.20529	gray
Supercontig_12.4	1103441	1105369	964.5	-0.20514	7.70204	0.00665637	peaks1_common	193.94	223.574		Supercontig_12.4	1103440	1105369	NCU04988		7.59947	7.80461	0.20514	gray
Supercontig_12.5	4538315	4542381	2033.5	-0.20506	7.43362	0.00871176	peaks1_common	161.019	185.612		Supercontig_12.5	4538314	4542381	NCU09544		7.33109	7.53615	0.20506	gray
Supercontig_12.4	2236501	2240444	1972	-0.20485	7.50869	0.00829014	peaks1_common	169.632	195.512		Supercontig_12.4	2236500	2240444	NCU16779		7.40626	7.61111	0.20485	gray
Supercontig_12.5	1249646	1253257	1806	-0.20485	7.50869	0.00829014	peaks1_common	169.632	195.512		Supercontig_12.5	1249645	1253257	NCU04670		7.40626	7.61111	0.20485	gray
Supercontig_12.2	3526773	3528890	1059	-0.20462	7.42636	0.00869159	peaks1_common	160.236	184.653		Supercontig_12.2	3526772	3528890	NCU08475		7.32405	7.52867	0.20462	gray
Supercontig_12.1	3540764	3541793	515	-0.20455	7.58004	0.00787857	peaks1_common	178.251	205.403		Supercontig_12.1	3540763	3541793	NCU09372		7.47776	7.68231	0.20455	gray
Supercontig_12.3	4664863	4667489	1313.5	-0.20454	8.07137	0.00451274	peaks1_common	250.575	288.743		Supercontig_12.3	4664862	4667489	NCU08216		7.9691	8.17364	0.20454	gray
Supercontig_12.1	726288	730970	2341.5	-0.20453	7.65426	0.00752943	peaks1_common	187.662	216.245		Supercontig_12.1	726287	730970	NCU09065		7.55199	7.75653	0.20453	gray
Supercontig_12.3	1608039	1609585	773.5	-0.20453	7.65426	0.00752943	peaks1_common	187.662	216.245		Supercontig_12.3	1608038	1609585	NCU06490		7.55199	7.75653	0.20453	gray
Supercontig_12.5	3412646	3413551	453	-0.20444	7.5018	0.0082709	peaks1_common	168.848	194.553		Supercontig_12.5	3412645	3413551	NCU01261		7.39958	7.60402	0.20444	gray
Supercontig_12.7	1232018	1235352	1667.5	-0.20444	7.5018	0.0082709	peaks1_common	168.848	194.553		Supercontig_12.7	1232017	1235352	NCU09401		7.39958	7.60402	0.20444	gray
Supercontig_12.4	2002765	2005748	1492	-0.20443	7.38337	0.00990648	peaks1_common	155.541	179.22		Supercontig_12.4	2002764	2005748	NCU09729		7.28116	7.48559	0.20443	gray
Supercontig_12.5	2413148	2416645	1749	-0.20443	7.38337	0.00990648	peaks1_common	155.541	179.22		Supercontig_12.5	2413147	2416645	NCU03787		7.28116	7.48559	0.20443	gray
Supercontig_12.2	765792	766884	546.5	-0.2043	7.75888	0.00679656	peaks1_common	201.793	232.491		Supercontig_12.2	765791	766884	NCU03424		7.65673	7.86103	0.2043	gray
Supercontig_12.6	3191325	3194928	1802	-0.20417	7.41907	0.00867108	peaks1_common	159.453	183.693		Supercontig_12.6	3191324	3194928	NCU05985		7.31698	7.52115	0.20417	gray
Supercontig_12.2	991877	994545	1334.5	-0.20412	7.53472	0.00834613	peaks1_common	172.764	199.021		Supercontig_12.2	991876	994545	NCU03356		7.43266	7.63678	0.20412	gray
Supercontig_12.5	2475565	2479486	1961	-0.20396	7.37586	0.00988931	peaks1_common	154.759	178.26		Supercontig_12.5	2475564	2479486	NCU03808		7.27388	7.47784	0.20396	gray
Supercontig_12.1	8944802	8947158	1178.5	-0.2039	7.45391	0.00875112	peaks1_common	163.366	188.166		Supercontig_12.1	8944801	8947158	NCU02840		7.35196	7.55586	0.2039	gray
Supercontig_12.7	3953771	3954145	187.5	-0.2038	7.67782	0.00708116	peaks1_common	190.8	219.75		Supercontig_12.7	3953770	3954145	NCU10954		7.57592	7.77972	0.2038	gray
Supercontig_12.6	3106649	3107588	470	-0.20375	7.71297	0.00716836	peaks1_common	195.51	225.166		Supercontig_12.6	3106648	3107588	NCU06007		7.61109	7.81484	0.20375	gray
Supercontig_12.1	9392348	9397527	2590	-0.20372	7.52796	0.00832775	peaks1_common	171.98	198.064		Supercontig_12.1	9392347	9397527	NCU09253		7.4261	7.62982	0.20372	gray
Supercontig_12.4	19910	21754	922.5	-0.20348	10.5632	3.8067e-06	peaks1_common	1409.95	1623.52		Supercontig_12.4	19909	21754	NCU09639		10.4614	10.6649	0.20348	gray
Supercontig_12.7	2786502	2788647	1073	-0.2034	7.5603	0.00784104	peaks1_common	175.899	202.531		Supercontig_12.7	2786501	2788647	NCU02353		7.4586	7.662	0.2034	gray
Supercontig_12.1	1526760	1531289	2265	-0.2032	7.32352	0.00977855	peaks1_common	149.284	171.864		Supercontig_12.1	1526759	1531289	NCU02053		7.22192	7.42512	0.2032	gray
Supercontig_12.2	1580152	1581654	751.5	-0.20307	7.59193	0.00791506	peaks1_common	179.818	206.997		Supercontig_12.2	1580151	1581654	NCU05418		7.49039	7.69347	0.20307	gray
Supercontig_12.3	560817	562427	805.5	-0.20306	8.38399	0.00296148	peaks1_common	311.364	358.423		Supercontig_12.3	560816	562427	NCU05700		8.28246	8.48552	0.20306	gray
Supercontig_12.4	1757422	1761451	2015	-0.20302	7.43958	0.00935708	peaks1_common	161.8	186.249		Supercontig_12.4	1757421	1761451	NCU06598		7.33807	7.54109	0.20302	gray
Supercontig_12.3	3774267	3779312	2523	-0.20301	7.55366	0.00782189	peaks1_common	175.115	201.574		Supercontig_12.3	3774266	3779312	NCU00415		7.45215	7.65516	0.20301	gray
Supercontig_12.5	6032208	6032868	330.5	-0.20284	10.8474	6.9365e-07	peaks1_common	1717.32	1976.57		Supercontig_12.5	6032207	6032868	NCU09952		10.7459	10.9488	0.20284	gray
Supercontig_12.7	131206	135410	2102.5	-0.20274	7.69498	0.00711667	peaks1_common	193.154	222.298		Supercontig_12.7	131205	135410	NCU09270		7.59361	7.79635	0.20274	gray
Supercontig_12.2	2512545	2516036	1746	-0.20257	7.43235	0.00933941	peaks1_common	161.017	185.289		Supercontig_12.2	2512544	2516036	NCU01765		7.33106	7.53363	0.20257	gray
Supercontig_12.1	5085458	5088645	1594	-0.2024	7.65318	0.00752943	peaks1_common	187.66	215.924		Supercontig_12.1	5085457	5088645	NCU16391		7.55198	7.75438	0.2024	gray
Supercontig_12.1	965259	968393	1567.5	-0.20237	7.61652	0.00743926	peaks1_common	182.954	210.504		Supercontig_12.1	965258	968393	NCU02179		7.51534	7.71771	0.20237	gray
Supercontig_12.3	2244762	2247195	1217	-0.20233	7.38954	0.00924605	peaks1_common	156.322	179.857		Supercontig_12.3	2244761	2247195	NCU00005		7.28837	7.4907	0.20233	gray
Supercontig_12.5	2290722	2292378	828.5	-0.20231	7.57891	0.00787857	peaks1_common	178.25	205.083		Supercontig_12.5	2290721	2292378	NCU11261		7.47776	7.68007	0.20231	gray
Supercontig_12.5	4845021	4848886	1933	-0.20231	7.57891	0.00787857	peaks1_common	178.25	205.083		Supercontig_12.5	4845020	4848886	NCU04104		7.47776	7.68007	0.20231	gray
Supercontig_12.4	5686728	5688072	672.5	-0.20221	7.54028	0.00836424	peaks1_common	173.546	199.658		Supercontig_12.4	5686727	5688072	NCU05227		7.43917	7.64138	0.20221	gray
Supercontig_12.1	5724687	5727082	1198	-0.20212	7.42509	0.00932141	peaks1_common	160.233	184.33		Supercontig_12.1	5724686	5727082	NCU08333		7.32403	7.52615	0.20212	gray
Supercontig_12.7	3182045	3185763	1859.5	-0.20192	7.57235	0.00785994	peaks1_common	177.465	204.125		Supercontig_12.7	3182044	3185763	NCU02249		7.47139	7.67331	0.20192	gray
Supercontig_12.6	743194	748256	2531.5	-0.20189	7.45979	0.00877032	peaks1_common	164.147	188.803		Supercontig_12.6	743193	748256	NCU04767		7.35885	7.56073	0.20189	gray
Supercontig_12.3	517579	518540	481	-0.20181	8.11026	0.00460833	peaks1_common	257.665	296.351		Supercontig_12.3	517578	518540	NCU16615		8.00936	8.21117	0.20181	gray
Supercontig_12.6	831892	834829	1469	-0.2018	7.53355	0.00834613	peaks1_common	172.763	198.7		Supercontig_12.6	831891	834829	NCU10732		7.43265	7.63445	0.2018	gray
Supercontig_12.7	1397874	1399729	928	-0.2018	7.53355	0.00834613	peaks1_common	172.763	198.7		Supercontig_12.7	1397873	1399729	NCU09707		7.43265	7.63445	0.2018	gray
Supercontig_12.2	4216986	4218423	719	-0.20178	8.01448	0.00502181	peaks1_common	241.117	277.313		Supercontig_12.2	4216985	4218423	NCU16596		7.91359	8.11537	0.20178	gray
Supercontig_12.5	5000076	5002854	1389.5	-0.20162	7.60372	0.00740154	peaks1_common	181.385	208.591		Supercontig_12.5	5000075	5002854	NCU04147		7.50291	7.70453	0.20162	gray
Supercontig_12.6	2660708	2663869	1581	-0.20162	7.60372	0.00740154	peaks1_common	181.385	208.591		Supercontig_12.6	2660707	2663869	NCU11263		7.50291	7.70453	0.20162	gray
Supercontig_12.3	2416517	2418227	855.5	-0.20152	7.56576	0.00841694	peaks1_common	176.681	203.167		Supercontig_12.3	2416516	2418227	NCU00051		7.465	7.66652	0.20152	gray
Supercontig_12.6	2741932	2747233	2651	-0.20152	7.56576	0.00841694	peaks1_common	176.681	203.167		Supercontig_12.6	2741931	2747233	NCU03852		7.465	7.66652	0.20152	gray
Supercontig_12.1	7067679	7069718	1020	-0.20145	7.45267	0.00875112	peaks1_common	163.364	187.844		Supercontig_12.1	7067678	7069718	NCU00817		7.35194	7.55339	0.20145	gray
Supercontig_12.7	3173700	3174263	282	-0.20145	7.45267	0.00875112	peaks1_common	163.364	187.844		Supercontig_12.7	3173699	3174263	NCU02253		7.35194	7.55339	0.20145	gray
Supercontig_12.5	6027730	6028640	455.5	-0.20144	11.0153	2.44812e-07	peaks1_common	1930.3	2219.55		Supercontig_12.5	6027729	6028640	NCU09949		10.9146	11.116	0.20144	gray
Supercontig_12.4	4021312	4025082	1885.5	-0.20137	7.37454	0.00988931	peaks1_common	154.756	177.937		Supercontig_12.4	4021311	4025082	NCU08047		7.27385	7.47522	0.20137	gray
Supercontig_12.3	3101199	3104840	1821	-0.20123	7.2529	0.0103528	peaks1_common	142.25	163.542		Supercontig_12.3	3101198	3104840	NCU00232		7.15229	7.35351	0.20123	gray
Supercontig_12.4	3288876	3292839	1982	-0.20114	7.29194	0.0104275	peaks1_common	146.156	168.022		Supercontig_12.4	3288875	3292839	NCU04457		7.19137	7.39251	0.20114	gray
Supercontig_12.1	5275227	5278987	1880.5	-0.20113	7.55915	0.00839964	peaks1_common	175.897	202.211		Supercontig_12.1	5275226	5278987	NCU03312		7.45859	7.65972	0.20113	gray
Supercontig_12.5	1808818	1810999	1091	-0.20072	7.5525	0.00838208	peaks1_common	175.113	201.252		Supercontig_12.5	1808817	1810999	NCU03602		7.45214	7.65286	0.20072	gray
Supercontig_12.7	2676116	2679507	1696	-0.20072	7.40309	0.00993979	peaks1_common	157.885	181.453		Supercontig_12.7	2676115	2679507	NCU02386		7.30273	7.50345	0.20072	gray
Supercontig_12.2	3842219	3845206	1494	-0.20056	7.51315	0.00829014	peaks1_common	170.41	195.826		Supercontig_12.2	3842218	3845206	NCU08738		7.41287	7.61343	0.20056	gray
Supercontig_12.5	2341478	2346239	2381	-0.20054	7.43832	0.00935708	peaks1_common	161.798	185.927		Supercontig_12.5	2341477	2346239	NCU03765		7.33805	7.53859	0.20054	gray
Supercontig_12.3	4791553	4792371	409.5	-0.20046	11.404	1.11998e-08	peaks1_common	2528.03	2904.87		Supercontig_12.3	4791552	4792371	NCU08255		11.3038	11.5043	0.20046	gray
Supercontig_12.2	432025	434576	1276	-0.20034	7.4727	0.00942457	peaks1_common	165.712	190.397		Supercontig_12.2	432024	434576	NCU03509		7.37253	7.57287	0.20034	gray
Supercontig_12.3	1020153	1021420	634	-0.20032	7.68787	0.00709902	peaks1_common	192.366	221.02		Supercontig_12.3	1020152	1021420	NCU07834		7.58771	7.78803	0.20032	gray
Supercontig_12.6	2576503	2578984	1241	-0.20013	7.50629	0.00887905	peaks1_common	169.627	194.868		Supercontig_12.6	2576502	2578984	NCU03890		7.40622	7.60636	0.20013	gray
Supercontig_12.1	7177092	7178704	806.5	-0.20006	7.57776	0.00787857	peaks1_common	178.247	204.76		Supercontig_12.1	7177091	7178704	NCU00787		7.47773	7.67779	0.20006	gray
Supercontig_12.1	9628172	9629777	803	-0.20002	7.91617	0.00549879	peaks1_common	225.371	258.887		Supercontig_12.1	9628171	9629777	NCU08621		7.81616	8.01618	0.20002	gray
Supercontig_12.3	3969150	3972538	1694.5	-0.1999	7.46565	0.00940816	peaks1_common	164.929	189.44		Supercontig_12.3	3969149	3972538	NCU00470		7.3657	7.5656	0.1999	gray
Supercontig_12.1	5389944	5394388	2222.5	-0.1997	7.49939	0.00886168	peaks1_common	168.843	193.91		Supercontig_12.1	5389943	5394388	NCU09118		7.39954	7.59924	0.1997	gray
Supercontig_12.4	3513120	3515597	1239	-0.19962	7.42382	0.00932141	peaks1_common	160.231	184.009		Supercontig_12.4	3513119	3515597	NCU04391		7.32401	7.52363	0.19962	gray
Supercontig_12.1	4123070	4126293	1612	-0.19949	7.53237	0.00892947	peaks1_common	172.76	198.379		Supercontig_12.1	4123069	4126293	NCU09810		7.43262	7.63211	0.19949	gray
Supercontig_12.3	4428900	4431960	1530.5	-0.19945	7.45855	0.00939145	peaks1_common	164.145	188.481		Supercontig_12.3	4428899	4431960	NCU07543		7.35882	7.55827	0.19945	gray
Supercontig_12.7	3342763	3346073	1655.5	-0.19938	7.34407	0.0105274	peaks1_common	151.627	174.099		Supercontig_12.7	3342762	3346073	NCU02203		7.24438	7.44376	0.19938	gray
[truncated: 7,723 more rows]

## Sheet: ACF1
chr	start	end	summit	M_value	A_value	P_value	Peak_Group	normalized_read_density_in_WT_merged	normalized_read_density_in_acf1_merged		chrom	start	end	gene		log2(WT)	log2(crf4-2)	log2(FC)	k27_col
Supercontig_12.1	17441	19615	1087.5	-1.03893	9.53978	1.12789e-44	peaks1_common	519.261	1066.93		Supercontig_12.1	17440	19615	NCU09904		9.02032	10.0592	1.03893	green
Supercontig_12.1	7836568	7839994	1713.5	-1.01863	7.93267	1.18783e-15	peaks1_common	171.653	347.769		Supercontig_12.1	7836567	7839994	NCU00611		7.42335	8.44198	1.01863	green
Supercontig_12.5	244090	245184	547.5	-1.00604	8.71615	9.68931e-25	peaks1_common	296.755	596.001		Supercontig_12.5	244089	245184	NCU07801		8.21313	9.21917	1.00604	green
Supercontig_12.3	241501	243748	1124	-0.90902	10.5494	2.4733e-67	peaks1_common	1093.58	2053.49		Supercontig_12.3	241500	243748	NCU09171		10.0948	11.0039	0.90902	gray
Supercontig_12.1	9681489	9685711	2111.5	-0.90602	9.01384	9.57386e-25	peaks1_common	377.63	707.629		Supercontig_12.1	9681488	9685711	NCU08637		8.56083	9.46685	0.90602	gray
Supercontig_12.3	4797220	4798623	702	-0.90116	10.5902	3.25258e-68	peaks1_common	1128.06	2106.73		Supercontig_12.3	4797219	4798623	NCU08258		10.1396	11.0408	0.90116	gray
Supercontig_12.6	3751174	3752463	645	-0.89161	10.6086	1.05661e-67	peaks1_common	1146.33	2126.72		Supercontig_12.6	3751173	3752463	NCU05096		10.1628	11.0544	0.89161	gray
Supercontig_12.1	9664598	9666695	1049	-0.87142	8.81321	2.65873e-20	peaks1_common	332.567	608.418		Supercontig_12.1	9664597	9666695	NCU08634		8.3775	9.24892	0.87142	gray
Supercontig_12.2	4434417	4437058	1321	-0.81404	9.19201	6.17009e-23	peaks1_common	441.109	775.525		Supercontig_12.2	4434416	4437058	NCU09486		8.78499	9.59903	0.81404	gray
Supercontig_12.1	34981	39245	2132.5	-0.80838	10.1003	2.57497e-40	peaks1_common	829.495	1452.65		Supercontig_12.1	34980	39245	NCU09906		9.69609	10.5045	0.80838	gray
Supercontig_12.5	6417640	6419476	918.5	-0.7901	10.5148	1.87405e-50	peaks1_common	1112.61	1923.92		Supercontig_12.5	6417639	6419476	NCU07149		10.1197	10.9098	0.7901	gray
Supercontig_12.3	277684	279201	759	-0.78665	10.1391	3.93468e-39	peaks1_common	858.554	1481.06		Supercontig_12.3	277683	279201	NCU09183		9.74577	10.5324	0.78665	gray
Supercontig_12.1	6266990	6268040	525.5	-0.7709	8.02651	1.50182e-10	peaks1_common	199.613	340.606		Supercontig_12.1	6266989	6268040	NCU07354		7.64106	8.41196	0.7709	gray
Supercontig_12.6	3234149	3236869	1360.5	-0.75685	7.9196	9.35601e-10	peaks1_common	186.26	314.742		Supercontig_12.6	3234148	3236869	NCU11216		7.54118	8.29802	0.75685	gray
Supercontig_12.3	341949	343583	817.5	-0.75105	9.78334	1.0995e-28	peaks1_common	679.258	1143.2		Supercontig_12.3	341948	343583	NCU10004		9.40781	10.1589	0.75105	gray
Supercontig_12.2	4437282	4438739	729	-0.74307	9.19795	1.38784e-19	peaks1_common	453.958	759.805		Supercontig_12.2	4437281	4438739	NCU09487		8.82641	9.56948	0.74307	gray
Supercontig_12.4	169007	171785	1389.5	-0.73637	8.68232	3.30216e-14	peaks1_common	318.276	530.241		Supercontig_12.4	169006	171785	NCU16721		8.31414	9.0505	0.73637	gray
Supercontig_12.3	276773	277640	434	-0.73398	9.30638	1.68153e-20	peaks1_common	490.936	816.534		Supercontig_12.3	276772	277640	NCU09182		8.93939	9.67337	0.73398	gray
Supercontig_12.1	59146	61150	1002.5	-0.73252	9.42227	6.87778e-22	peaks1_common	532.268	884.385		Supercontig_12.1	59145	61150	NCU09913		9.05601	9.78853	0.73252	gray
Supercontig_12.4	5907077	5909108	1016	-0.73203	8.17679	1.54525e-10	peaks1_common	224.532	372.941		Supercontig_12.4	5907076	5909108	NCU05162		7.81078	8.5428	0.73203	gray
Supercontig_12.1	5557665	5562248	2292	-0.72745	6.89568	1.61524e-05	peaks1_common	92.5368	153.214		Supercontig_12.1	5557664	5562248	NCU08378		6.53195	7.2594	0.72745	gray
Supercontig_12.6	3732709	3734273	782.5	-0.70943	10.4323	4.47166e-39	peaks1_common	1080.55	1766.88		Supercontig_12.6	3732708	3734273	NCU05104		10.0776	10.787	0.70943	gray
Supercontig_12.3	4794104	4794463	180	-0.70858	10.4824	2.39844e-40	peaks1_common	1119.1	1828.82		Supercontig_12.3	4794103	4794463	NCU08256		10.1281	10.8367	0.70858	gray
Supercontig_12.6	3846114	3848671	1279	-0.70726	8.95374	1.33012e-15	peaks1_common	388.053	633.574		Supercontig_12.6	3846113	3848671	NCU10911		8.60011	9.30737	0.70726	gray
Supercontig_12.5	6254918	6256671	877	-0.70411	8.1011	1.46145e-09	peaks1_common	215.127	350.472		Supercontig_12.5	6254917	6256671	NCU07202		7.74904	8.45316	0.70411	gray
Supercontig_12.3	285490	287797	1154	-0.69429	10.5512	1.42884e-40	peaks1_common	1179.61	1908.71		Supercontig_12.3	285489	287797	NCU09186		10.2041	10.8984	0.69429	gray
Supercontig_12.3	245253	247405	1076.5	-0.69077	10.4386	2.08099e-37	peaks1_common	1092.32	1763.16		Supercontig_12.3	245252	247405	NCU09172		10.0932	10.7839	0.69077	gray
Supercontig_12.3	23389	29028	2820	-0.67586	9.61682	2.05217e-21	peaks1_common	621.19	992.381		Supercontig_12.3	23388	29028	NCU09520		9.27889	9.95475	0.67586	gray
Supercontig_12.5	239110	239682	286.5	-0.66952	8.84146	2.4354e-13	peaks1_common	363.724	578.519		Supercontig_12.5	239109	239682	NCU16916		8.5067	9.17622	0.66952	gray
Supercontig_12.3	32761	35175	1207.5	-0.667	9.25852	6.59524e-17	peaks1_common	486.07	771.766		Supercontig_12.3	32760	35175	NCU09518		8.92502	9.59202	0.667	gray
Supercontig_12.3	239408	241233	913	-0.66571	10.6169	3.66106e-39	peaks1_common	1246.87	1977.97		Supercontig_12.3	239407	241233	NCU09170		10.2841	10.9498	0.66571	gray
Supercontig_12.3	4788658	4789684	513.5	-0.65935	10.5209	3.79672e-36	peaks1_common	1169.13	1846.48		Supercontig_12.3	4788657	4789684	NCU08254		10.1912	10.8506	0.65935	gray
Supercontig_12.1	9647309	9649735	1213.5	-0.65435	8.45345	1.94227e-10	peaks1_common	279.417	439.776		Supercontig_12.1	9647308	9649735	NCU08629		8.12628	8.78062	0.65435	gray
Supercontig_12.1	7266073	7266621	274.5	-0.65401	8.14284	7.06147e-09	peaks1_common	225.321	354.55		Supercontig_12.1	7266072	7266621	NCU00764		7.81584	8.46985	0.65401	gray
Supercontig_12.5	6431522	6433447	963	-0.65187	10.6128	1.27097e-37	peaks1_common	1249.22	1962.78		Supercontig_12.5	6431521	6433447	NCU07144		10.2868	10.9387	0.65187	gray
Supercontig_12.6	3778134	3781784	1825.5	-0.64567	10.308	2.25701e-30	peaks1_common	1013.56	1585.68		Supercontig_12.6	3778133	3781784	NCU05086		9.98521	10.6309	0.64567	gray
Supercontig_12.6	3715815	3717107	646.5	-0.64473	10.5627	1.33302e-35	peaks1_common	1209.66	1891.24		Supercontig_12.6	3715814	3717107	NCU05110		10.2404	10.8851	0.64473	gray
Supercontig_12.3	4782348	4783813	733	-0.63931	10.3856	2.20699e-31	peaks1_common	1071.86	1669.51		Supercontig_12.3	4782347	4783813	NCU08252		10.0659	10.7052	0.63931	gray
Supercontig_12.3	1633443	1635306	932	-0.63613	7.13792	2.36781e-05	peaks1_common	112.975	175.58		Supercontig_12.3	1633442	1635306	NCU06497		6.81986	7.45599	0.63613	gray
Supercontig_12.6	3896137	3898073	968.5	-0.62514	9.82856	2.77776e-21	peaks1_common	732.147	1129.23		Supercontig_12.6	3896136	3898073	NCU05056		9.51599	10.1411	0.62514	gray
Supercontig_12.6	2672208	2674597	1195	-0.62308	7.75177	9.9408e-07	peaks1_common	173.673	267.484		Supercontig_12.6	2672207	2674597	NCU03868		7.44023	8.06331	0.62308	gray
Supercontig_12.4	596221	596899	339.5	-0.62263	10.146	9.88435e-26	peaks1_common	913.135	1405.94		Supercontig_12.4	596220	596899	NCU04879		9.83469	10.4573	0.62263	gray
Supercontig_12.3	4786333	4787613	640.5	-0.61677	10.4032	1.13287e-29	peaks1_common	1093.54	1676.87		Supercontig_12.3	4786332	4787613	NCU08253		10.0948	10.7116	0.61677	gray
Supercontig_12.2	1672115	1675786	1836	-0.61563	8.18973	3.13979e-08	peaks1_common	235.881	361.423		Supercontig_12.2	1672114	1675786	NCU05460		7.88191	8.49754	0.61563	gray
Supercontig_12.4	349040	351899	1430	-0.61419	10.5027	2.28007e-31	peaks1_common	1172.7	1795.05		Supercontig_12.4	349039	351899	NCU07637		10.1956	10.8098	0.61419	gray
Supercontig_12.3	5130163	5131035	436.5	-0.61294	9.93145	6.75865e-22	peaks1_common	789.601	1207.59		Supercontig_12.3	5130162	5131035	NCU08785		9.62498	10.2379	0.61294	gray
Supercontig_12.5	6380906	6384609	1852	-0.60619	8.79877	4.32303e-11	peaks1_common	360.955	549.458		Supercontig_12.5	6380905	6384609	NCU07162		8.49568	9.10187	0.60619	gray
Supercontig_12.5	280159	282370	1106	-0.60093	7.73329	2.03494e-06	peaks1_common	172.784	262.06		Supercontig_12.5	280158	282370	NCU07789		7.43282	8.03376	0.60093	gray
Supercontig_12.6	13843	17940	2049	-0.59912	9.34103	8.46813e-15	peaks1_common	526.931	798.191		Supercontig_12.6	13842	17940	NCU07139		9.04147	9.64059	0.59912	gray
Supercontig_12.6	3759862	3761894	1016.5	-0.58952	10.3956	3.08076e-27	peaks1_common	1098.1	1652.37		Supercontig_12.6	3759861	3761894	NCU05093		10.1008	10.6903	0.58952	gray
Supercontig_12.5	6155250	6157523	1137	-0.58913	10.1952	5.04265e-24	peaks1_common	955.846	1437.92		Supercontig_12.5	6155249	6157523	NCU07235		9.90064	10.4898	0.58913	gray
Supercontig_12.3	384222	386039	909	-0.58536	10.0674	6.14489e-22	peaks1_common	875.965	1314.31		Supercontig_12.3	384221	386039	NCU05655		9.77473	10.3601	0.58536	gray
Supercontig_12.6	4134789	4138121	1666.5	-0.58533	8.29197	4.07259e-08	peaks1_common	255.877	383.913		Supercontig_12.6	4134788	4138121	NCU05000		7.9993	8.58464	0.58533	gray
Supercontig_12.6	3889494	3891758	1132.5	-0.57961	9.94525	4.49558e-20	peaks1_common	806.452	1205.2		Supercontig_12.6	3889493	3891758	NCU05059		9.65544	10.2351	0.57961	gray
Supercontig_12.5	5497886	5499495	805	-0.57743	8.51557	7.07809e-09	peaks1_common	299.592	447.048		Supercontig_12.5	5497885	5499495	NCU04285		8.22686	8.80428	0.57743	gray
Supercontig_12.7	14946	20558	2806.5	-0.57576	8.31854	4.12068e-08	peaks1_common	261.499	389.754		Supercontig_12.7	14945	20558	NCU09301		8.03066	8.60642	0.57576	gray
Supercontig_12.3	4807036	4808227	596	-0.57343	10.2853	3.33225e-24	peaks1_common	1022.98	1522.26		Supercontig_12.3	4807035	4808227	NCU08260		9.99857	10.572	0.57343	gray
Supercontig_12.3	281000	282805	903	-0.56926	10.6105	3.21285e-29	peaks1_common	1283.53	1904.45		Supercontig_12.3	280999	282805	NCU09184		10.3259	10.8952	0.56926	gray
Supercontig_12.5	6414593	6416401	904.5	-0.56726	10.462	1.66366e-26	peaks1_common	1158.76	1716.95		Supercontig_12.5	6414592	6416401	NCU07150		10.1784	10.7456	0.56726	gray
Supercontig_12.4	380902	384787	1943	-0.56662	10.4741	1.1962e-26	peaks1_common	1168.81	1731.06		Supercontig_12.4	380901	384787	NCU07644		10.1908	10.7574	0.56662	gray
Supercontig_12.1	102314	105940	1813.5	-0.56354	7.81513	3.21297e-06	peaks1_common	185.254	273.785		Supercontig_12.1	102313	105940	NCU08051		7.53336	8.0969	0.56354	gray
Supercontig_12.3	4815061	4816061	500.5	-0.56344	10.4437	7.13003e-26	peaks1_common	1145.71	1693.12		Supercontig_12.3	4815060	4816061	NCU08262		10.162	10.7255	0.56344	gray
Supercontig_12.3	4478037	4480191	1077.5	-0.56125	7.28645	6.42908e-05	peaks1_common	128.518	189.634		Supercontig_12.3	4478036	4480191	NCU07532		7.00583	7.56707	0.56125	gray
Supercontig_12.4	353975	356880	1453	-0.55805	10.3365	8.31481e-24	peaks1_common	1065.63	1568.91		Supercontig_12.4	353974	356880	NCU07638		10.0575	10.6155	0.55805	gray
Supercontig_12.3	4809123	4810856	867	-0.5573	10.4711	7.21931e-26	peaks1_common	1170.1	1721.81		Supercontig_12.3	4809122	4810856	NCU16704		10.1924	10.7497	0.5573	gray
Supercontig_12.5	6194674	6197388	1357.5	-0.55229	10.3788	5.97019e-24	peaks1_common	1099.54	1612.38		Supercontig_12.5	6194673	6197388	NCU07226		10.1027	10.655	0.55229	gray
Supercontig_12.4	588839	589543	352.5	-0.5519	10.2908	1.04195e-22	peaks1_common	1034.59	1516.72		Supercontig_12.4	588838	589543	NCU10644		10.0148	10.5667	0.5519	gray
Supercontig_12.4	584452	585958	753.5	-0.55153	10.2548	3.27205e-22	peaks1_common	1009.26	1479.21		Supercontig_12.4	584451	585958	NCU04877		9.97908	10.5306	0.55153	gray
Supercontig_12.3	5242495	5244087	796.5	-0.54754	9.16406	1.29666e-11	peaks1_common	474.508	693.537		Supercontig_12.3	5242494	5244087	NCU08760		8.89029	9.43783	0.54754	gray
Supercontig_12.1	8066094	8067082	494.5	-0.54637	7.24192	9.51012e-05	peaks1_common	125.256	182.925		Supercontig_12.1	8066093	8067082	NCU10916		6.96873	7.5151	0.54637	gray
Supercontig_12.6	3838297	3840513	1108.5	-0.5449	9.7928	1.72622e-16	peaks1_common	734.363	1071.38		Supercontig_12.6	3838296	3840513	NCU05069		9.52035	10.0653	0.5449	gray
Supercontig_12.5	210262	212692	1215.5	-0.53823	7.47265	4.10704e-05	peaks1_common	147.394	214.044		Supercontig_12.5	210261	212692	NCU07810		7.20353	7.74177	0.53823	gray
Supercontig_12.4	1667	3325	829.5	-0.53702	10.8934	1.61061e-31	peaks1_common	1579.11	2291.25		Supercontig_12.4	1666	3325	NCU10285		10.6249	11.1619	0.53702	gray
Supercontig_12.4	5453326	5455004	839.5	-0.53695	7.21836	0.000153864	peaks1_common	123.63	179.375		Supercontig_12.4	5453325	5455004	NCU05287		6.94988	7.48684	0.53695	gray
Supercontig_12.5	4313772	4316735	1482	-0.53656	7.24408	0.000116612	peaks1_common	125.871	182.577		Supercontig_12.5	4313771	4316735	NCU06697		6.9758	7.51236	0.53656	gray
Supercontig_12.2	1677867	1678593	363.5	-0.53493	10.0733	6.88392e-19	peaks1_common	895.088	1296.87		Supercontig_12.2	1677866	1678593	NCU05463		9.80589	10.3408	0.53493	gray
Supercontig_12.7	1264603	1266767	1082.5	-0.53321	7.45973	4.71873e-05	peaks1_common	146.334	211.767		Supercontig_12.7	1264602	1266767	NCU09390		7.19313	7.72634	0.53321	gray
Supercontig_12.4	6446	8374	964.5	-0.52963	10.7523	4.55055e-28	peaks1_common	1435.61	2072.38		Supercontig_12.4	6445	8374	NCU09636		10.4874	11.0171	0.52963	gray
Supercontig_12.7	534714	537221	1254	-0.52477	7.10381	0.000272089	peaks1_common	114.676	164.985		Supercontig_12.7	534713	537221	NCU06860		6.84142	7.36619	0.52477	gray
Supercontig_12.6	4159484	4162424	1470.5	-0.52159	10.6078	4.4841e-25	peaks1_common	1302.48	1869.76		Supercontig_12.6	4159483	4162424	NCU04991		10.347	10.8686	0.52159	gray
Supercontig_12.3	4748856	4749347	246	-0.51997	10.53	1.00885e-23	peaks1_common	1234.79	1770.6		Supercontig_12.3	4748855	4749347	NCU08239		10.2701	10.79	0.51997	gray
Supercontig_12.4	398858	401443	1293	-0.5167	8.18635	1.71145e-06	peaks1_common	243.537	348.424		Supercontig_12.4	398857	401443	NCU07649		7.928	8.4447	0.5167	gray
Supercontig_12.3	4820893	4822548	828	-0.51661	10.2184	2.09448e-19	peaks1_common	996.064	1424.96		Supercontig_12.3	4820892	4822548	NCU08264		9.96009	10.4767	0.51661	gray
Supercontig_12.3	230217	233968	1876	-0.51656	10.4117	8.94189e-22	peaks1_common	1138.87	1629.2		Supercontig_12.3	230216	233968	NCU09167		10.1534	10.6699	0.51656	gray
Supercontig_12.2	3012906	3015387	1241	-0.51353	7.19502	0.000245278	peaks1_common	122.637	175.07		Supercontig_12.2	3012905	3015387	NCU01589		6.93825	7.45179	0.51353	gray
Supercontig_12.3	282889	285185	1148.5	-0.51329	10.1653	1.31474e-18	peaks1_common	961.181	1371.9		Supercontig_12.3	282888	285185	NCU09185		9.90866	10.422	0.51329	gray
Supercontig_12.2	952867	955187	1160.5	-0.51163	7.23323	0.000192481	peaks1_common	126.012	179.65		Supercontig_12.2	952866	955187	NCU03365		6.97742	7.48904	0.51163	gray
Supercontig_12.1	7337923	7338783	430.5	-0.51106	7.80454	1.5916e-05	peaks1_common	187.274	266.884		Supercontig_12.1	7337922	7338783	NCU00747		7.54901	8.06007	0.51106	gray
Supercontig_12.6	3851636	3854244	1304.5	-0.50872	7.72817	2.76445e-05	peaks1_common	177.763	252.919		Supercontig_12.6	3851635	3854244	NCU05066		7.47381	7.98253	0.50872	gray
Supercontig_12.1	102849	103781	466.5	-0.5077	8.00184	6.02286e-06	peaks1_common	214.97	305.64		Supercontig_12.1	102848	103781	NCU16303		7.74799	8.25569	0.5077	gray
Supercontig_12.3	555279	557222	972	-0.50238	9.3626	2.15843e-11	peaks1_common	553.105	783.5		Supercontig_12.3	555278	557222	NCU05699		9.11141	9.61379	0.50238	gray
Supercontig_12.7	933250	936171	1461	-0.50016	8.89459	7.75613e-09	peaks1_common	400.181	566.005		Supercontig_12.7	933249	936171	NCU09581		8.64451	9.14467	0.50016	gray
Supercontig_12.1	45332	48154	1411.5	-0.49963	9.71526	1.0378e-13	peaks1_common	706.941	999.508		Supercontig_12.1	45331	48154	NCU09909		9.46545	9.96507	0.49963	gray
Supercontig_12.6	948327	951606	1640	-0.49945	6.84084	0.000830148	peaks1_common	96.4103	136.293		Supercontig_12.6	948326	951606	NCU04824		6.59111	7.09057	0.49945	gray
Supercontig_12.6	4144717	4146414	849	-0.49726	9.81275	2.20508e-14	peaks1_common	756.985	1068.51		Supercontig_12.6	4144716	4146414	NCU04997		9.56412	10.0614	0.49726	gray
Supercontig_12.4	377981	379563	791.5	-0.49668	10.3322	2.02315e-19	peaks1_common	1085.25	1531.25		Supercontig_12.4	377980	379563	NCU07643		10.0838	10.5805	0.49668	gray
Supercontig_12.6	3794170	3796368	1099.5	-0.49665	10.5301	7.62042e-22	peaks1_common	1244.85	1756.4		Supercontig_12.6	3794169	3796368	NCU05085		10.2818	10.7784	0.49665	gray
Supercontig_12.3	4767460	4769023	782	-0.49539	10.2409	2.44598e-18	peaks1_common	1019.2	1436.76		Supercontig_12.3	4767459	4769023	NCU08245		9.99321	10.4886	0.49539	gray
Supercontig_12.1	134927	137208	1141	-0.49533	8.71972	5.09392e-08	peaks1_common	355.093	500.555		Supercontig_12.1	134926	137208	NCU08060		8.47206	8.96738	0.49533	gray
Supercontig_12.4	8110	19545	5718	-0.49501	10.32	3.52303e-19	peaks1_common	1076.8	1517.57		Supercontig_12.4	8109	19545	NCU09637		10.0725	10.5675	0.49501	gray
Supercontig_12.3	296327	298561	1117.5	-0.49356	10.475	6.55884e-21	peaks1_common	1199.52	1688.82		Supercontig_12.3	296326	298561	NCU09189		10.2282	10.7218	0.49356	gray
Supercontig_12.6	3745790	3747272	741.5	-0.49165	10.5535	7.6757e-22	peaks1_common	1267.39	1782.02		Supercontig_12.6	3745789	3747272	NCU05098		10.3076	10.7993	0.49165	gray
Supercontig_12.3	225709	227571	931.5	-0.49129	10.3618	2.21804e-19	peaks1_common	1109.85	1560.12		Supercontig_12.3	225708	227571	NCU09165		10.1162	10.6074	0.49129	gray
Supercontig_12.1	1059592	1061748	1078.5	-0.49101	7.06753	0.000492139	peaks1_common	113.145	159.017		Supercontig_12.1	1059591	1061748	NCU02155		6.82202	7.31304	0.49101	gray
Supercontig_12.4	560167	561105	469.5	-0.49039	9.92445	5.81172e-15	peaks1_common	819.872	1151.78		Supercontig_12.4	560166	561105	NCU04870		9.67926	10.1696	0.49039	gray
Supercontig_12.3	4795017	4795815	399.5	-0.48836	10.4895	9.76401e-21	peaks1_common	1213.8	1702.77		Supercontig_12.3	4795016	4795815	NCU08257		10.2453	10.7337	0.48836	gray
Supercontig_12.6	3804073	3805934	931	-0.48826	10.4311	5.62789e-20	peaks1_common	1165.7	1635.19		Supercontig_12.6	3804072	3805934	NCU05081		10.187	10.6752	0.48826	gray
Supercontig_12.3	404824	408883	2030	-0.48806	7.69302	5.62197e-05	peaks1_common	174.731	245.07		Supercontig_12.3	404823	408883	NCU05664		7.44899	7.93705	0.48806	gray
Supercontig_12.3	4735926	4738698	1386.5	-0.48398	10.3649	5.53783e-19	peaks1_common	1115.08	1559.55		Supercontig_12.3	4735925	4738698	NCU08235		10.1229	10.6069	0.48398	gray
Supercontig_12.3	4740152	4742400	1124.5	-0.48152	10.4832	3.59732e-20	peaks1_common	1211.37	1691.33		Supercontig_12.3	4740151	4742400	NCU08236		10.2424	10.7239	0.48152	gray
Supercontig_12.4	5743949	5745200	626	-0.4801	7.28807	0.000264807	peaks1_common	132.332	184.582		Supercontig_12.4	5743948	5745200	NCU05209		7.04802	7.52812	0.4801	gray
Supercontig_12.7	3226365	3230952	2294	-0.47852	7.19293	0.000404238	peaks1_common	123.955	172.708		Supercontig_12.7	3226364	3230952	NCU02237		6.95367	7.43219	0.47852	gray
Supercontig_12.3	4811606	4812655	525	-0.47841	10.5147	2.27083e-20	peaks1_common	1239.49	1726.87		Supercontig_12.3	4811605	4812655	NCU08261		10.2755	10.7539	0.47841	gray
Supercontig_12.5	6231160	6232580	710.5	-0.47699	10.2605	2.40084e-17	peaks1_common	1039.72	1447.12		Supercontig_12.5	6231159	6232580	NCU07211		10.022	10.499	0.47699	gray
Supercontig_12.4	332021	334319	1149.5	-0.47681	10.3067	8.28985e-18	peaks1_common	1073.61	1494.1		Supercontig_12.4	332020	334319	NCU07632		10.0683	10.5451	0.47681	gray
Supercontig_12.3	4825346	4825846	250.5	-0.47614	10.3678	1.84909e-18	peaks1_common	1120.33	1558.4		Supercontig_12.3	4825345	4825846	NCU16705		10.1297	10.6058	0.47614	gray
Supercontig_12.4	1985858	1989874	2008.5	-0.4754	7.1718	0.000449365	peaks1_common	122.285	170.013		Supercontig_12.4	1985857	1989874	NCU09733		6.9341	7.4095	0.4754	gray
Supercontig_12.6	1391460	1393605	1073	-0.47489	7.11728	0.000555347	peaks1_common	117.771	163.679		Supercontig_12.6	1391459	1393605	NCU05593		6.87984	7.35472	0.47489	gray
Supercontig_12.5	2685463	2687523	1030.5	-0.47429	7.21056	0.000423862	peaks1_common	125.663	174.575		Supercontig_12.5	2685462	2687523	NCU01014		6.97341	7.4477	0.47429	gray
Supercontig_12.3	1751036	1755898	2431.5	-0.47374	7.1843	0.000460101	peaks1_common	123.42	171.394		Supercontig_12.3	1751035	1755898	NCU06171		6.94743	7.42117	0.47374	gray
Supercontig_12.3	202081	204463	1191.5	-0.47226	7.88909	3.17163e-05	peaks1_common	201.266	279.213		Supercontig_12.3	202080	204463	NCU09159		7.65296	8.12522	0.47226	gray
Supercontig_12.3	5221629	5223943	1157.5	-0.47203	7.98978	2.15319e-05	peaks1_common	215.832	299.372		Supercontig_12.3	5221628	5223943	NCU08766		7.75376	8.2258	0.47203	gray
Supercontig_12.6	9191	11740	1275	-0.47065	10.2226	1.19351e-16	peaks1_common	1014.99	1406.51		Supercontig_12.6	9190	11740	NCU07140		9.98726	10.4579	0.47065	gray
Supercontig_12.1	8701416	8703127	856	-0.4699	7.07994	0.000702002	peaks1_common	114.96	159.221		Supercontig_12.1	8701415	8703127	NCU02916		6.84499	7.31489	0.4699	gray
Supercontig_12.1	9694632	9697675	1522	-0.46731	9.54222	3.11848e-11	peaks1_common	634.099	876.661		Supercontig_12.1	9694631	9697675	NCU08641		9.30856	9.77587	0.46731	gray
Supercontig_12.3	4802863	4804759	948.5	-0.46689	10.0996	2.68849e-15	peaks1_common	933.299	1289.94		Supercontig_12.3	4802862	4804759	NCU08259		9.86619	10.3331	0.46689	gray
Supercontig_12.3	5247940	5248821	441	-0.4663	10.6745	1.88125e-21	peaks1_common	1390.42	1920.96		Supercontig_12.3	5247939	5248821	NCU10427		10.4413	10.9076	0.4663	gray
Supercontig_12.6	3898507	3899721	607.5	-0.46393	10.0391	1.31103e-14	peaks1_common	895.857	1235.65		Supercontig_12.6	3898506	3899721	NCU05055		9.80713	10.2711	0.46393	gray
Supercontig_12.5	413692	416603	1456	-0.46247	7.13251	0.000674857	peaks1_common	119.534	164.706		Supercontig_12.5	413691	416603	NCU07753		6.90128	7.36375	0.46247	gray
Supercontig_12.5	6124357	6127639	1641.5	-0.46175	9.21679	2.91055e-09	peaks1_common	507.026	698.282		Supercontig_12.5	6124356	6127639	NCU07241		8.98592	9.44767	0.46175	gray
Supercontig_12.4	340142	342668	1263.5	-0.46156	10.3367	3.60902e-17	peaks1_common	1102.01	1517.5		Supercontig_12.4	340141	342668	NCU07634		10.1059	10.5675	0.46156	gray
Supercontig_12.6	3864210	3868482	2136.5	-0.46125	7.29194	0.000437061	peaks1_common	133.557	183.873		Supercontig_12.6	3864209	3868482	NCU05064		7.06132	7.52256	0.46125	gray
Supercontig_12.1	4789775	4791981	1103.5	-0.46062	7.21103	0.000492863	peaks1_common	126.301	173.807		Supercontig_12.1	4789774	4791981	NCU03172		6.98072	7.44134	0.46062	gray
Supercontig_12.7	1287974	1289425	726	-0.46001	7.08982	0.000717699	peaks1_common	116.148	159.767		Supercontig_12.7	1287973	1289425	NCU10016		6.85982	7.31983	0.46001	gray
Supercontig_12.1	9759597	9762612	1508	-0.45934	10.4175	6.06304e-18	peaks1_common	1166.41	1603.71		Supercontig_12.1	9759596	9762612	NCU10027		10.1879	10.6472	0.45934	gray
Supercontig_12.5	2479610	2481383	887	-0.45804	7.15089	0.000594501	peaks1_common	121.252	166.561		Supercontig_12.5	2479609	2481383	NCU03809		6.92187	7.37991	0.45804	gray
Supercontig_12.2	4439442	4442042	1300.5	-0.458	7.98368	2.89908e-05	peaks1_common	215.969	296.663		Supercontig_12.2	4439441	4442042	NCU09488		7.75468	8.21268	0.458	gray
Supercontig_12.4	206078	206393	158	-0.45783	10.5545	2.71832e-19	peaks1_common	1283.22	1762.47		Supercontig_12.4	206077	206393	NCU07602		10.3256	10.7834	0.45783	gray
Supercontig_12.7	923740	924601	431	-0.45699	10.4456	4.56372e-18	peaks1_common	1190.26	1633.83		Supercontig_12.7	923739	924601	NCU12039		10.2171	10.674	0.45699	gray
Supercontig_12.6	1370176	1373028	1426.5	-0.45603	7.08809	0.000832115	peaks1_common	116.168	159.356		Supercontig_12.6	1370175	1373028	NCU05600		6.86007	7.31611	0.45603	gray
Supercontig_12.3	4823696	4824538	421.5	-0.45542	10.293	2.02189e-16	peaks1_common	1071.38	1469.05		Supercontig_12.3	4823695	4824538	NCU08265		10.0653	10.5207	0.45542	gray
Supercontig_12.5	6035121	6038202	1541	-0.45534	9.55592	8.1405e-11	peaks1_common	642.811	881.361		Supercontig_12.5	6035120	6038202	NCU09954		9.32825	9.78359	0.45534	gray
Supercontig_12.5	3521382	3522895	757	-0.45533	7.15641	0.000704142	peaks1_common	121.832	167.043		Supercontig_12.5	3521381	3522895	NCU01284		6.92875	7.38408	0.45533	gray
Supercontig_12.7	949514	953044	1765.5	-0.45427	7.51882	0.000223348	peaks1_common	156.681	214.667		Supercontig_12.7	949513	953044	NCU09576		7.29168	7.74596	0.45427	gray
Supercontig_12.7	4133694	4136992	1649.5	-0.4542	7.14922	0.000689456	peaks1_common	121.273	166.147		Supercontig_12.7	4133693	4136992	NCU05876		6.92212	7.37632	0.4542	gray
Supercontig_12.2	4466318	4468439	1061	-0.45373	9.81808	1.91351e-12	peaks1_common	771.336	1056.4		Supercontig_12.2	4466317	4468439	NCU09494		9.59122	10.0449	0.45373	gray
Supercontig_12.5	4559876	4562322	1223.5	-0.4536	7.12181	0.000765352	peaks1_common	119.016	162.987		Supercontig_12.5	4559875	4562322	NCU09551		6.89501	7.34861	0.4536	gray
Supercontig_12.3	3337759	3340089	1165.5	-0.45307	7.142	0.000797559	peaks1_common	120.715	165.253		Supercontig_12.3	3337758	3340089	NCU00292		6.91546	7.36854	0.45307	gray
Supercontig_12.2	2032917	2036333	1708.5	-0.45292	7.26405	0.000474449	peaks1_common	131.379	179.833		Supercontig_12.2	2032916	2036333	NCU06759		7.03759	7.49051	0.45292	gray
Supercontig_12.1	3085699	3089949	2125.5	-0.45249	7.11445	0.000749377	peaks1_common	118.456	162.095		Supercontig_12.1	3085698	3089949	NCU02656		6.88821	7.34069	0.45249	gray
Supercontig_12.1	186040	188208	1084.5	-0.45091	9.97687	1.90217e-13	peaks1_common	861.923	1178.16		Supercontig_12.1	186039	188208	NCU08076		9.75141	10.2023	0.45091	gray
Supercontig_12.1	2478016	2480713	1349	-0.44961	6.98244	0.00109389	peaks1_common	108.206	147.774		Supercontig_12.1	2478015	2480713	NCU02485		6.75763	7.20725	0.44961	gray
Supercontig_12.3	4791553	4792371	409.5	-0.4491	10.6899	3.05494e-20	peaks1_common	1413.84	1930.15		Supercontig_12.3	4791552	4792371	NCU08255		10.4654	10.9145	0.4491	gray
Supercontig_12.3	4743262	4743806	272.5	-0.44894	10.5613	9.55379e-19	peaks1_common	1293.26	1765.35		Supercontig_12.3	4743261	4743806	NCU08237		10.3368	10.7857	0.44894	gray
Supercontig_12.4	335889	337120	616	-0.44821	10.3277	2.63139e-16	peaks1_common	1100.23	1501.1		Supercontig_12.4	335888	337120	NCU07633		10.1036	10.5518	0.44821	gray
Supercontig_12.1	8976446	8979513	1534	-0.44711	7.19227	0.000648	peaks1_common	125.254	170.76		Supercontig_12.1	8976445	8979513	NCU02828		6.96872	7.41582	0.44711	gray
Supercontig_12.5	207349	209381	1016.5	-0.44568	7.72636	0.000117836	peaks1_common	181.462	247.143		Supercontig_12.5	207348	209381	NCU07811		7.50352	7.9492	0.44568	gray
Supercontig_12.3	4775946	4776607	331	-0.44546	10.4808	1.22145e-17	peaks1_common	1224.54	1667.52		Supercontig_12.3	4775945	4776607	NCU08249		10.258	10.7035	0.44546	gray
Supercontig_12.5	3816482	3819147	1333	-0.44498	7.15856	0.000704142	peaks1_common	122.452	166.693		Supercontig_12.5	3816481	3819147	NCU01377		6.93607	7.38105	0.44498	gray
Supercontig_12.1	7256383	7258595	1106.5	-0.4447	7.55888	0.000248298	peaks1_common	161.628	219.98		Supercontig_12.1	7256382	7258595	NCU00765		7.33653	7.78123	0.4447	gray
Supercontig_12.3	4800161	4800732	286	-0.44322	10.4259	6.40758e-17	peaks1_common	1179.74	1604.01		Supercontig_12.3	4800160	4800732	NCU16703		10.2042	10.6475	0.44322	gray
Supercontig_12.5	6047047	6049161	1057.5	-0.44272	9.61023	9.95365e-11	peaks1_common	670.396	911.179		Supercontig_12.5	6047046	6049161	NCU09958		9.38887	9.83159	0.44272	gray
Supercontig_12.7	943779	944454	338	-0.44227	10.11	4.58291e-14	peaks1_common	948.067	1288.18		Supercontig_12.7	943778	944454	NCU09578		9.88884	10.3311	0.44227	gray
Supercontig_12.6	1383606	1385728	1061.5	-0.4415	7.30715	0.000527052	peaks1_common	135.9	184.554		Supercontig_12.6	1383605	1385728	NCU05596		7.0864	7.5279	0.4415	gray
Supercontig_12.3	4761941	4764324	1192	-0.44013	10.2399	5.145e-15	peaks1_common	1038.15	1408.49		Supercontig_12.3	4761940	4764324	NCU08243		10.0198	10.4599	0.44013	gray
Supercontig_12.4	11075	19163	4044.5	-0.43853	10.2668	3.47723e-15	peaks1_common	1058.3	1434.23		Supercontig_12.4	11074	19163	NCU09638		10.0475	10.4861	0.43853	gray
Supercontig_12.6	3840490	3842149	830	-0.43853	9.12772	3.26615e-08	peaks1_common	480.521	651.213		Supercontig_12.6	3840489	3842149	NCU05068		8.90846	9.34699	0.43853	gray
Supercontig_12.4	387841	389353	756.5	-0.43578	10.5242	1.77427e-17	peaks1_common	1266.2	1712.72		Supercontig_12.4	387840	389353	NCU07645		10.3063	10.7421	0.43578	gray
Supercontig_12.7	1419319	1421975	1328.5	-0.43577	7.20661	0.000778801	peaks1_common	127.004	171.789		Supercontig_12.7	1419318	1421975	NCU09700		6.98873	7.4245	0.43577	gray
Supercontig_12.5	6428125	6429262	569	-0.43576	10.6563	7.68258e-19	peaks1_common	1387.61	1876.92		Supercontig_12.5	6428124	6429262	NCU07145		10.4384	10.8741	0.43576	gray
Supercontig_12.4	5793912	5796404	1246.5	-0.43575	7.31053	0.000527052	peaks1_common	136.49	184.619		Supercontig_12.4	5793911	5796404	NCU05195		7.09266	7.52841	0.43575	gray
Supercontig_12.7	4168312	4170729	1209	-0.43559	9.17919	2.04327e-08	peaks1_common	498.481	674.178		Supercontig_12.7	4168311	4170729	NCU05887		8.96139	9.39698	0.43559	gray
Supercontig_12.5	6177261	6177892	316	-0.43457	10.4998	4.58707e-17	peaks1_common	1245.53	1683.34		Supercontig_12.5	6177260	6177892	NCU07229		10.2825	10.7171	0.43457	gray
Supercontig_12.2	2961574	2965753	2090	-0.43452	7.19967	0.000763715	peaks1_common	126.449	170.891		Supercontig_12.2	2961573	2965753	NCU01611		6.98241	7.41693	0.43452	gray
Supercontig_12.1	6028440	6032698	2129.5	-0.43343	7.15354	0.00109828	peaks1_common	122.516	165.45		Supercontig_12.1	6028439	6032698	NCU07411		6.93682	7.37025	0.43343	gray
Supercontig_12.5	2338965	2341241	1138.5	-0.43343	7.15354	0.00109828	peaks1_common	122.516	165.45		Supercontig_12.5	2338964	2341241	NCU03763		6.93682	7.37025	0.43343	gray
Supercontig_12.1	9652927	9654209	641.5	-0.43261	8.73649	8.60509e-07	peaks1_common	367.14	495.518		Supercontig_12.1	9652926	9654209	NCU08631		8.52019	8.95279	0.43261	gray
Supercontig_12.5	229594	231351	879	-0.4326	7.61487	0.000248318	peaks1_common	168.73	227.728		Supercontig_12.5	229593	231351	NCU07805		7.39857	7.83117	0.4326	gray
Supercontig_12.3	5131725	5134722	1499	-0.43227	8.82007	5.18268e-07	peaks1_common	389.083	525.011		Supercontig_12.3	5131724	5134722	NCU08784		8.60393	9.0362	0.43227	gray
Supercontig_12.3	272107	273360	627	-0.43151	10.8095	2.38527e-20	peaks1_common	1545.34	2084.11		Supercontig_12.3	272106	273360	NCU09179		10.5937	11.0252	0.43151	gray
Supercontig_12.3	19915	22496	1291	-0.42977	8.21006	2.16126e-05	peaks1_common	255.145	343.685		Supercontig_12.3	19914	22496	NCU09521		7.99517	8.42495	0.42977	gray
Supercontig_12.7	922026	922793	384	-0.42968	10.2267	2.0925e-14	peaks1_common	1032.49	1390.69		Supercontig_12.7	922025	922793	NCU09584		10.0119	10.4416	0.42968	gray
Supercontig_12.6	3080312	3087794	3741.5	-0.42922	7.56177	0.000335127	peaks1_common	162.823	219.242		Supercontig_12.6	3080311	3087794	NCU06013		7.34716	7.77638	0.42922	gray
Supercontig_12.1	4395595	4398319	1362.5	-0.42827	7.20334	0.000896012	peaks1_common	127.046	170.955		Supercontig_12.1	4395594	4398319	NCU03063		6.9892	7.41748	0.42827	gray
Supercontig_12.4	1302757	1305569	1406.5	-0.42788	7.2714	0.000758858	peaks1_common	133.201	179.189		Supercontig_12.4	1302756	1305569	NCU07934		7.05746	7.48534	0.42788	gray
Supercontig_12.3	273675	274366	346	-0.4271	10.7092	8.66586e-19	peaks1_common	1443.79	1941.22		Supercontig_12.3	273674	274366	NCU09180		10.4956	10.9228	0.4271	gray
Supercontig_12.6	1305	3239	967.5	-0.42625	10.7073	9.52117e-19	peaks1_common	1442.29	1938.06		Supercontig_12.6	1304	3239	NCU07143		10.4941	10.9204	0.42625	gray
Supercontig_12.4	4242983	4243578	298	-0.42608	8.40649	1.02454e-05	peaks1_common	292.735	393.312		Supercontig_12.4	4242982	4243578	NCU08646		8.19345	8.61953	0.42608	gray
Supercontig_12.3	2496305	2500846	2271	-0.42227	7.08742	0.00129942	peaks1_common	117.481	157.429		Supercontig_12.3	2496304	2500846	NCU00068		6.87628	7.29856	0.42227	gray
Supercontig_12.3	1937493	1940150	1329	-0.4218	7.14848	0.00125844	peaks1_common	122.58	164.208		Supercontig_12.3	1937492	1940150	NCU06217		6.93758	7.35938	0.4218	gray
Supercontig_12.6	3950402	3952344	971.5	-0.42176	7.45362	0.000463608	peaks1_common	151.454	202.882		Supercontig_12.6	3950401	3952344	NCU05043		7.24274	7.6645	0.42176	gray
Supercontig_12.1	9180232	9183407	1588	-0.4195	7.09317	0.00132249	peaks1_common	118.064	157.906		Supercontig_12.1	9180231	9183407	NCU02790		6.88342	7.30292	0.4195	gray
Supercontig_12.4	5869810	5871864	1027.5	-0.4193	10.1623	2.67331e-13	peaks1_common	990.93	1325.15		Supercontig_12.4	5869809	5871864	NCU05175		9.95264	10.3719	0.4193	gray
Supercontig_12.3	4186915	4189856	1471	-0.41927	7.17367	0.00113765	peaks1_common	124.849	166.954		Supercontig_12.3	4186914	4189856	NCU09003		6.96404	7.38331	0.41927	gray
Supercontig_12.4	4091898	4097300	2701.5	-0.41803	7.10633	0.00134559	peaks1_common	119.206	159.272		Supercontig_12.4	4091897	4097300	NCU08688		6.89731	7.31534	0.41803	gray
Supercontig_12.4	576875	580204	1665	-0.41677	10.127	6.41335e-13	peaks1_common	967.854	1292.02		Supercontig_12.4	576874	580204	NCU04874		9.91864	10.3354	0.41677	gray
Supercontig_12.4	4104617	4109427	2405.5	-0.4157	7.07053	0.00146409	peaks1_common	116.378	155.243		Supercontig_12.4	4104616	4109427	NCU08685		6.86268	7.27838	0.4157	gray
Supercontig_12.6	3894456	3895844	694.5	-0.41512	9.72786	2.25565e-10	peaks1_common	734.338	979.173		Supercontig_12.6	3894455	3895844	NCU05057		9.5203	9.93542	0.41512	gray
Supercontig_12.1	109911	112060	1075	-0.41458	7.83748	0.000165354	peaks1_common	198.114	264.069		Supercontig_12.1	109910	112060	NCU08052		7.63019	8.04477	0.41458	gray
Supercontig_12.3	4452947	4455926	1490	-0.41337	7.26508	0.000870741	peaks1_common	133.287	177.511		Supercontig_12.3	4452946	4455926	NCU07536		7.05839	7.47177	0.41337	gray
Supercontig_12.4	3960	5883	962	-0.41282	10.6677	2.4578e-17	peaks1_common	1409.86	1876.93		Supercontig_12.4	3959	5883	NCU09635		10.4613	10.8742	0.41282	gray
Supercontig_12.5	4758899	4761774	1438	-0.41276	7.15776	0.00127985	peaks1_common	123.758	164.751		Supercontig_12.5	4758898	4761774	NCU01435		6.95138	7.36414	0.41276	gray
Supercontig_12.3	2368758	2371313	1278	-0.41226	7.02599	0.00182293	peaks1_common	112.975	150.344		Supercontig_12.3	2368757	2371313	NCU00039		6.81986	7.23212	0.41226	gray
Supercontig_12.3	4858979	4859825	423.5	-0.41196	10.4448	3.16767e-15	peaks1_common	1208.34	1607.69		Supercontig_12.3	4858978	4859825	NCU08575		10.2388	10.6508	0.41196	gray
Supercontig_12.1	2798544	2801136	1296.5	-0.41158	7.17032	0.00130128	peaks1_common	124.891	166.123		Supercontig_12.1	2798543	2801136	NCU02580		6.96453	7.37611	0.41158	gray
Supercontig_12.4	4966707	4970951	2122.5	-0.41141	6.91105	0.00205926	peaks1_common	104.354	138.79		Supercontig_12.4	4966706	4970951	NCU07029		6.70534	7.11676	0.41141	gray
Supercontig_12.3	9257	12729	1736.5	-0.41038	10.4047	9.39674e-15	peaks1_common	1175.84	1562.73		Supercontig_12.3	9256	12729	NCU09526		10.1995	10.6098	0.41038	gray
Supercontig_12.2	1874216	1878346	2065.5	-0.40936	7.19512	0.00117719	peaks1_common	127.155	168.874		Supercontig_12.2	1874215	1878346	NCU06812		6.99044	7.3998	0.40936	gray
Supercontig_12.2	3794980	3798612	1816.5	-0.40878	7.30464	0.000933209	peaks1_common	137.211	182.156		Supercontig_12.2	3794979	3798612	NCU08721		7.10025	7.50903	0.40878	gray
Supercontig_12.6	3764397	3766529	1066.5	-0.40825	10.5698	4.14425e-16	peaks1_common	1319.44	1751		Supercontig_12.6	3764396	3766529	NCU05091		10.3657	10.774	0.40825	gray
Supercontig_12.4	3269555	3271861	1153.5	-0.4078	7.23828	0.00110141	peaks1_common	131.087	173.908		Supercontig_12.4	3269554	3271861	NCU04464		7.03438	7.44218	0.4078	gray
Supercontig_12.2	2353075	2355977	1451.5	-0.40739	7.12885	0.00161434	peaks1_common	121.529	161.182		Supercontig_12.2	2353074	2355977	NCU01809		6.92516	7.33255	0.40739	gray
Supercontig_12.1	99983	102134	1076	-0.40677	8.19145	4.78285e-05	peaks1_common	253.891	336.587		Supercontig_12.1	99982	102134	NCU08050		7.98806	8.39484	0.40677	gray
Supercontig_12.5	6166308	6168117	905	-0.40673	9.38491	1.90306e-08	peaks1_common	580.658	769.765		Supercontig_12.5	6166307	6168117	NCU07231		9.18154	9.58827	0.40673	gray
Supercontig_12.3	4754828	4756339	756	-0.40607	10.1921	6.56402e-13	peaks1_common	1016.3	1346.66		Supercontig_12.3	4754827	4756339	NCU08241		9.9891	10.3952	0.40607	gray
Supercontig_12.4	554456	555600	572.5	-0.40598	10.3034	1.0611e-13	peaks1_common	1097.84	1454.62		Supercontig_12.4	554455	555600	NCU04869		10.1005	10.5064	0.40598	gray
Supercontig_12.2	4213495	4216857	1681.5	-0.405	7.22469	0.00123677	peaks1_common	129.984	172.11		Supercontig_12.2	4213494	4216857	NCU16595		7.02219	7.42719	0.405	gray
Supercontig_12.7	85892	89396	1752.5	-0.40387	7.32565	0.000844798	peaks1_common	139.461	184.514		Supercontig_12.7	85891	89396	NCU09283		7.12372	7.52758	0.40387	gray
Supercontig_12.5	3364271	3366783	1256.5	-0.40377	7.29661	0.00106485	peaks1_common	136.686	180.831		Supercontig_12.5	3364270	3366783	NCU01248		7.09473	7.4985	0.40377	gray
Supercontig_12.3	4927313	4929808	1248	-0.40325	9.46942	9.96495e-09	peaks1_common	616.431	815.22		Supercontig_12.3	4927312	4929808	NCU08558		9.26779	9.67104	0.40325	gray
Supercontig_12.7	754567	757904	1669	-0.40315	7.19877	0.00136572	peaks1_common	127.751	168.937		Supercontig_12.7	754566	757904	NCU06914		6.99719	7.40035	0.40315	gray
Supercontig_12.5	1644417	1648772	2178	-0.40226	7.03615	0.00185215	peaks1_common	114.168	150.882		Supercontig_12.5	1644416	1648772	NCU04570		6.83502	7.23728	0.40226	gray
Supercontig_12.6	1566612	1569457	1423	-0.40198	7.07859	0.00196866	peaks1_common	117.588	155.372		Supercontig_12.6	1566611	1569457	NCU05543		6.8776	7.27958	0.40198	gray
Supercontig_12.4	582996	583373	189	-0.40138	10.0405	1.21461e-11	peaks1_common	916.41	1210.37		Supercontig_12.4	582995	583373	NCU04876		9.83985	10.2412	0.40138	gray
Supercontig_12.4	3700850	3703734	1442.5	-0.40069	7.11243	0.00156425	peaks1_common	120.433	158.988		Supercontig_12.4	3700849	3703734	NCU04346		6.91209	7.31277	0.40069	gray
Supercontig_12.1	340059	343487	1714.5	-0.39994	6.99853	0.00201643	peaks1_common	111.319	146.881		Supercontig_12.1	340058	343487	NCU08119		6.79856	7.1985	0.39994	gray
Supercontig_12.1	5039041	5041415	1187.5	-0.39968	7.14548	0.00143822	peaks1_common	123.267	162.615		Supercontig_12.1	5039040	5041415	NCU03244		6.94564	7.34532	0.39968	gray
Supercontig_12.4	2405543	2407336	897	-0.39926	7.08437	0.00172889	peaks1_common	118.172	155.848		Supercontig_12.4	2405542	2407336	NCU16789		6.88474	7.284	0.39926	gray
Supercontig_12.4	1435733	1438366	1317	-0.39793	7.05573	0.0019105	peaks1_common	115.902	152.715		Supercontig_12.4	1435732	1438366	NCU07893		6.85677	7.2547	0.39793	gray
Supercontig_12.3	4773154	4773851	349	-0.39749	10.081	1.07286e-11	peaks1_common	943.726	1243.09		Supercontig_12.3	4773153	4773851	NCU08248		9.88223	10.2797	0.39749	gray
Supercontig_12.4	1598323	1600584	1131	-0.39669	7.36203	0.000903162	peaks1_common	143.379	188.756		Supercontig_12.4	1598322	1600584	NCU06547		7.16368	7.56038	0.39669	gray
Supercontig_12.3	5135492	5136906	707.5	-0.39519	8.30712	4.18715e-05	peaks1_common	276.191	363.224		Supercontig_12.3	5135491	5136906	NCU08783		8.10953	8.50472	0.39519	gray
Supercontig_12.7	541772	544953	1591	-0.39466	7.15644	0.00146142	peaks1_common	124.423	163.571		Supercontig_12.7	541771	544953	NCU06862		6.95911	7.35377	0.39466	gray
Supercontig_12.2	2498297	2500702	1203	-0.39432	7.26881	0.00133658	peaks1_common	134.517	176.799		Supercontig_12.2	2498296	2500702	NCU01769		7.07165	7.46597	0.39432	gray
Supercontig_12.1	8692542	8699834	3646.5	-0.39386	7.0325	0.00211076	peaks1_common	114.212	150.064		Supercontig_12.1	8692541	8699834	NCU02918		6.83557	7.22943	0.39386	gray
Supercontig_12.6	3213964	3218034	2035.5	-0.39384	7.30977	0.00108198	peaks1_common	138.414	181.861		Supercontig_12.6	3213963	3218034	NCU05978		7.11285	7.50669	0.39384	gray
Supercontig_12.6	3322517	3326426	1955	-0.3937	7.34957	0.00101235	peaks1_common	142.293	186.939		Supercontig_12.6	3322516	3326426	NCU05956		7.15272	7.54642	0.3937	gray
Supercontig_12.4	5735987	5741245	2629.5	-0.39316	7.20075	0.00136572	peaks1_common	128.371	168.585		Supercontig_12.4	5735986	5741245	NCU05211		7.00417	7.39733	0.39316	gray
Supercontig_12.3	3195326	3197868	1271.5	-0.39291	7.12925	0.00183681	peaks1_common	122.174	160.419		Supercontig_12.3	3195325	3197868	NCU00257		6.9328	7.3257	0.39291	gray
Supercontig_12.5	1556422	1560927	2253	-0.39219	7.16189	0.0016894	peaks1_common	125.001	164.049		Supercontig_12.5	1556421	1560927	NCU04598		6.9658	7.35799	0.39219	gray
Supercontig_12.4	5946299	5947549	625.5	-0.39214	10.284	7.88655e-13	peaks1_common	1088.32	1428.25		Supercontig_12.4	5946298	5947549	NCU16906		10.0879	10.48	0.39214	gray
Supercontig_12.2	2379105	2381977	1436.5	-0.3917	7.19379	0.00155426	peaks1_common	127.817	167.689		Supercontig_12.2	2379104	2381977	NCU01798		6.99794	7.38964	0.3917	gray
Supercontig_12.3	1437409	1439927	1259.5	-0.39143	7.22499	0.00162385	peaks1_common	130.624	171.338		Supercontig_12.3	1437408	1439927	NCU06446		7.02927	7.4207	0.39143	gray
Supercontig_12.3	5252358	5254295	969	-0.39108	10.4679	3.84108e-14	peaks1_common	1236.76	1621.86		Supercontig_12.3	5252357	5254295	NCU08756		10.2724	10.6634	0.39108	gray
Supercontig_12.3	338279	340718	1220	-0.39077	8.05412	0.000136001	peaks1_common	232.121	304.333		Supercontig_12.3	338278	340718	NCU10003		7.85873	8.2495	0.39077	gray
Supercontig_12.1	3502631	3504624	997	-0.39064	7.23695	0.00145185	peaks1_common	131.747	172.717		Supercontig_12.1	3502630	3504624	NCU09387		7.04163	7.43227	0.39064	gray
Supercontig_12.6	24458	25894	718.5	-0.39062	10.2664	1.35939e-12	peaks1_common	1075.73	1410.24		Supercontig_12.6	24457	25894	NCU11342		10.0711	10.4617	0.39062	gray
Supercontig_12.4	360310	360701	196	-0.39051	10.0837	2.17862e-11	peaks1_common	947.771	1242.39		Supercontig_12.4	360309	360701	NCU16728		9.88839	10.2789	0.39051	gray
Supercontig_12.1	9666967	9667581	307.5	-0.38966	8.91751	1.89083e-06	peaks1_common	422.463	553.462		Supercontig_12.1	9666966	9667581	NCU08635		8.72268	9.11234	0.38966	gray
Supercontig_12.7	3772847	3774169	661.5	-0.38916	7.23016	0.00143031	peaks1_common	131.196	171.818		Supercontig_12.7	3772846	3774169	NCU10416		7.03558	7.42474	0.38916	gray
Supercontig_12.1	4040179	4043224	1523	-0.38839	7.24208	0.00145185	peaks1_common	132.32	173.198		Supercontig_12.1	4040178	4043224	NCU10073		7.04789	7.43627	0.38839	gray
Supercontig_12.4	4343749	4345780	1016	-0.38731	7.17271	0.00171439	peaks1_common	126.155	165.005		Supercontig_12.4	4343748	4345780	NCU07332		6.97905	7.36636	0.38731	gray
Supercontig_12.3	4631535	4633728	1097	-0.38723	9.8547	5.54587e-10	peaks1_common	809.611	1058.87		Supercontig_12.3	4631534	4633728	NCU11286		9.66108	10.0483	0.38723	gray
Supercontig_12.1	8927389	8929868	1240	-0.38682	7.15303	0.00166439	peaks1_common	124.467	162.742		Supercontig_12.1	8927388	8929868	NCU02846		6.95962	7.34644	0.38682	gray
Supercontig_12.5	5464383	5466903	1260.5	-0.38634	7.27723	0.00153805	peaks1_common	135.68	177.343		Supercontig_12.5	5464382	5466903	NCU04275		7.08406	7.4704	0.38634	gray
Supercontig_12.1	91324	92593	635	-0.38626	10.1193	1.80341e-11	peaks1_common	972.915	1271.6		Supercontig_12.1	91323	92593	NCU10501		9.92617	10.3124	0.38626	gray
Supercontig_12.6	3250008	3253725	1859	-0.38557	7.07145	0.00223547	peaks1_common	117.675	153.728		Supercontig_12.6	3250007	3253725	NCU05972		6.87867	7.26424	0.38557	gray
Supercontig_12.6	1531007	1534672	1833	-0.38552	7.19742	0.00155426	peaks1_common	128.414	167.751		Supercontig_12.6	1531006	1534672	NCU05555		7.00466	7.39018	0.38552	gray
Supercontig_12.7	4151905	4154859	1477.5	-0.38548	7.25897	0.00149495	peaks1_common	134.013	175.061		Supercontig_12.7	4151904	4154859	NCU05881		7.06623	7.45171	0.38548	gray
Supercontig_12.6	3900072	3906576	3252.5	-0.38431	8.13174	0.000132173	peaks1_common	245.501	320.437		Supercontig_12.6	3900071	3906576	NCU05054		7.93958	8.32389	0.38431	gray
Supercontig_12.4	141914	142889	488	-0.38411	10.4259	1.81335e-13	peaks1_common	1204.22	1571.57		Supercontig_12.4	141913	142889	NCU07581		10.2339	10.618	0.38411	gray
Supercontig_12.4	2657753	2660692	1470	-0.38403	7.04257	0.00214206	peaks1_common	115.404	150.601		Supercontig_12.4	2657752	2660692	NCU06393		6.85056	7.23458	0.38403	gray
Supercontig_12.6	3744487	3745534	524	-0.38372	10.5661	1.52803e-14	peaks1_common	1327.26	1731.67		Supercontig_12.6	3744486	3745534	NCU05099		10.3742	10.758	0.38372	gray
Supercontig_12.1	5895528	5897810	1141.5	-0.38331	7.26401	0.0015165	peaks1_common	134.583	175.541		Supercontig_12.1	5895527	5897810	NCU09221		7.07235	7.45566	0.38331	gray
Supercontig_12.1	7340581	7341842	631	-0.38316	7.66487	0.000561251	peaks1_common	177.699	231.754		Supercontig_12.1	7340580	7341842	NCU00746		7.47329	7.85645	0.38316	gray
Supercontig_12.5	3360193	3364521	2164.5	-0.38271	7.05618	0.00249834	peaks1_common	116.552	151.959		Supercontig_12.5	3360192	3364521	NCU01247		6.86482	7.24753	0.38271	gray
Supercontig_12.3	292003	295031	1514.5	-0.38211	10.2968	2.13854e-12	peaks1_common	1101.88	1436.01		Supercontig_12.3	292002	295031	NCU09188		10.1057	10.4879	0.38211	gray
Supercontig_12.1	9661546	9662413	434	-0.38171	7.74419	0.000448859	peaks1_common	187.837	244.73		Supercontig_12.1	9661545	9662413	NCU16497		7.55334	7.93504	0.38171	gray
Supercontig_12.4	5790221	5793688	1734	-0.38144	7.06966	0.00253135	peaks1_common	117.698	153.318		Supercontig_12.4	5790220	5793688	NCU05196		6.87894	7.26038	0.38144	gray
Supercontig_12.4	4667957	4669687	865.5	-0.38124	7.34974	0.00132384	peaks1_common	142.926	186.155		Supercontig_12.4	4667956	4669687	NCU06960		7.15912	7.54036	0.38124	gray
Supercontig_12.7	11354	13870	1258.5	-0.38091	8.66603	1.12173e-05	peaks1_common	355.961	463.519		Supercontig_12.7	11353	13870	NCU09302		8.47558	8.85649	0.38091	gray
Supercontig_12.2	3109506	3111625	1060	-0.38025	7.25067	0.0014734	peaks1_common	133.486	173.741		Supercontig_12.2	3109505	3111625	NCU01550		7.06054	7.4408	0.38025	gray
Supercontig_12.6	831892	834829	1469	-0.37968	7.34347	0.0013052	peaks1_common	142.383	185.247		Supercontig_12.6	831891	834829	NCU10732		7.15363	7.53331	0.37968	gray
Supercontig_12.1	8944802	8947158	1178.5	-0.37902	7.27405	0.00153805	peaks1_common	135.725	176.504		Supercontig_12.1	8944801	8947158	NCU02840		7.08454	7.46356	0.37902	gray
Supercontig_12.4	5743894	5747538	1822.5	-0.379	7.31483	0.00143674	peaks1_common	139.617	181.563		Supercontig_12.4	5743893	5747538	NCU05208		7.12533	7.50433	0.379	gray
Supercontig_12.4	722522	723916	697.5	-0.37841	10.1085	4.4681e-11	peaks1_common	968.276	1258.67		Supercontig_12.4	722521	723916	NCU04916		9.91928	10.2977	0.37841	gray
Supercontig_12.5	1880364	1884011	1824	-0.37838	6.98915	0.00261073	peaks1_common	111.427	144.842		Supercontig_12.5	1880363	1884011	NCU03622		6.79996	7.17834	0.37838	gray
Supercontig_12.5	2884511	2886844	1167	-0.37824	7.53478	0.000947038	peaks1_common	162.654	211.41		Supercontig_12.5	2884510	2886844	NCU01091		7.34566	7.7239	0.37824	gray
Supercontig_12.5	3937221	3939355	1067.5	-0.37793	7.29705	0.00158112	peaks1_common	137.958	179.273		Supercontig_12.5	3937220	3939355	NCU01403		7.10808	7.48601	0.37793	gray
Supercontig_12.7	4170812	4172944	1066.5	-0.37714	8.91206	3.58017e-06	peaks1_common	422.7	548.988		Supercontig_12.7	4170811	4172944	NCU05888		8.72349	9.10063	0.37714	gray
Supercontig_12.5	6423834	6427067	1617	-0.37703	10.6646	5.97721e-15	peaks1_common	1424.32	1849.71		Supercontig_12.5	6423833	6427067	NCU07146		10.4761	10.8531	0.37703	gray
Supercontig_12.7	975705	977157	726.5	-0.37675	7.54848	0.000849725	peaks1_common	164.29	213.317		Supercontig_12.7	975704	977157	NCU09568		7.3601	7.73685	0.37675	gray
Supercontig_12.1	4111149	4116658	2755	-0.37633	7.21841	0.00183893	peaks1_common	130.712	169.669		Supercontig_12.1	4111148	4116658	NCU09807		7.03025	7.40658	0.37633	gray
Supercontig_12.5	6229405	6230566	581	-0.37585	10.1743	2.49478e-11	peaks1_common	1014.37	1316.26		Supercontig_12.5	6229404	6230566	NCU07212		9.98637	10.3622	0.37585	gray
Supercontig_12.3	4860632	4861381	375	-0.3755	10.4957	1.99782e-13	peaks1_common	1267.64	1644.5		Supercontig_12.3	4860631	4861381	NCU16707		10.3079	10.6834	0.3755	gray
Supercontig_12.3	3218739	3220987	1124.5	-0.375	7.09445	0.00229731	peaks1_common	120.005	155.627		Supercontig_12.3	3218738	3220987	NCU00265		6.90695	7.28195	0.375	gray
Supercontig_12.1	2460652	2463537	1443	-0.37498	7.24232	0.0018885	peaks1_common	132.958	172.423		Supercontig_12.1	2460651	2463537	NCU02481		7.05483	7.42981	0.37498	gray
Supercontig_12.6	1132762	1135968	1603.5	-0.37288	7.04483	0.00278837	peaks1_common	116.033	150.255		Supercontig_12.6	1132761	1135968	NCU09791		6.85839	7.23127	0.37288	gray
Supercontig_12.1	2441130	2443083	977	-0.37253	7.21676	0.00207719	peaks1_common	130.734	169.252		Supercontig_12.1	2441129	2443083	NCU02477		7.03049	7.40302	0.37253	gray
Supercontig_12.4	4186015	4188252	1119	-0.37226	7.30038	0.00180862	peaks1_common	138.549	179.335		Supercontig_12.4	4186014	4188252	NCU08662		7.11425	7.48651	0.37226	gray
Supercontig_12.1	6037229	6039332	1052	-0.37222	7.25919	0.0019379	peaks1_common	134.651	174.284		Supercontig_12.1	6037228	6039332	NCU07409		7.07308	7.4453	0.37222	gray
Supercontig_12.3	287851	290825	1487.5	-0.37198	10.541	1.33357e-13	peaks1_common	1309.68	1694.89		Supercontig_12.3	287850	290825	NCU09187		10.355	10.727	0.37198	gray
Supercontig_12.3	17631	19142	756	-0.37193	7.83035	0.00041879	peaks1_common	200.073	258.911		Supercontig_12.3	17630	19142	NCU09522		7.64438	8.01632	0.37193	gray
Supercontig_12.3	4772093	4772442	175	-0.37165	10.3124	5.80229e-12	peaks1_common	1117.88	1446.34		Supercontig_12.3	4772092	4772442	NCU08247		10.1265	10.4982	0.37165	gray
Supercontig_12.7	3956776	3960534	1879.5	-0.3714	7.03707	0.00275316	peaks1_common	115.47	149.372		Supercontig_12.7	3956775	3960534	NCU05828		6.85137	7.22277	0.3714	gray
Supercontig_12.5	6225076	6227238	1081.5	-0.37079	10.2806	1.03412e-11	peaks1_common	1093.86	1414.43		Supercontig_12.5	6225075	6227238	NCU07214		10.0952	10.466	0.37079	gray
Supercontig_12.3	4289142	4291117	988	-0.37068	7.29389	0.00178562	peaks1_common	138.002	178.432		Supercontig_12.3	4289141	4291117	NCU07578		7.10855	7.47923	0.37068	gray
Supercontig_12.3	1790619	1792643	1012.5	-0.36864	7.2988	0.00180862	peaks1_common	138.571	178.914		Supercontig_12.3	1790618	1792643	NCU06180		7.11448	7.48312	0.36864	gray
Supercontig_12.5	5238007	5241064	1529	-0.36834	7.09836	0.00262957	peaks1_common	120.609	155.69		Supercontig_12.5	5238006	5241064	NCU04216		6.91419	7.28253	0.36834	gray
Supercontig_12.3	237024	238377	677	-0.36785	10.4413	1.23366e-12	peaks1_common	1224.01	1579.49		Supercontig_12.3	237023	238377	NCU09169		10.2574	10.6252	0.36785	gray
Supercontig_12.6	1911844	1915063	1610	-0.36748	7.23906	0.0018885	peaks1_common	133.003	171.587		Supercontig_12.6	1911843	1915063	NCU04092		7.05532	7.4228	0.36748	gray
Supercontig_12.4	644509	646200	846	-0.36687	10.1286	1.23589e-10	peaks1_common	985.809	1271.25		Supercontig_12.4	644508	646200	NCU04890		9.94517	10.312	0.36687	gray
Supercontig_12.3	4818973	4820221	624.5	-0.36685	10.0535	3.00061e-10	peaks1_common	935.832	1206.79		Supercontig_12.3	4818972	4820221	NCU08263		9.8701	10.237	0.36685	gray
Supercontig_12.4	200140	200589	225	-0.36633	10.4688	8.80629e-13	peaks1_common	1248.16	1608.96		Supercontig_12.4	200139	200589	NCU07600		10.2856	10.6519	0.36633	gray
Supercontig_12.5	6362123	6362862	370	-0.36539	8.00414	0.000293864	peaks1_common	226.198	291.396		Supercontig_12.5	6362122	6362862	NCU17050		7.82144	8.18683	0.36539	gray
Supercontig_12.1	8055321	8057397	1038.5	-0.36466	7.14991	0.00245017	peaks1_common	125.156	161.148		Supercontig_12.1	8055320	8057397	NCU00547		6.96758	7.33224	0.36466	gray
Supercontig_12.5	3797944	3801663	1860	-0.36415	7.01957	0.00307048	peaks1_common	114.364	147.201		Supercontig_12.5	3797943	3801663	NCU01369		6.83749	7.20165	0.36415	gray
Supercontig_12.1	1657834	1659835	1001	-0.36394	7.12993	0.00238934	peaks1_common	123.465	158.892		Supercontig_12.1	1657833	1659835	NCU02019		6.94796	7.3119	0.36394	gray
Supercontig_12.5	2924896	2927577	1341	-0.36373	7.07583	0.00289297	peaks1_common	118.93	153.033		Supercontig_12.5	2924895	2927577	NCU01104		6.89396	7.2577	0.36373	gray
Supercontig_12.3	209447	211043	798.5	-0.36369	7.47439	0.00125432	peaks1_common	156.774	201.723		Supercontig_12.3	209446	211043	NCU09161		7.29254	7.65623	0.36369	gray
Supercontig_12.1	40950	42632	841.5	-0.36347	10.0845	2.58456e-10	peaks1_common	957.265	1231.54		Supercontig_12.1	40949	42632	NCU09907		9.90278	10.2662	0.36347	gray
Supercontig_12.5	4901323	4904760	1719	-0.36329	7.10966	0.00266204	peaks1_common	121.77	156.64		Supercontig_12.5	4901322	4904760	NCU04117		6.92802	7.2913	0.36329	gray
Supercontig_12.3	4207513	4209567	1027.5	-0.36328	7.05476	0.00282341	peaks1_common	117.224	150.79		Supercontig_12.3	4207512	4209567	NCU09008		6.87312	7.2364	0.36328	gray
Supercontig_12.3	5250258	5251830	786.5	-0.36292	10.45	2.0573e-12	peaks1_common	1233.52	1586.33		Supercontig_12.3	5250257	5251830	NCU08757		10.2686	10.6315	0.36292	gray
Supercontig_12.2	1893358	1896005	1324	-0.36227	7.15536	0.00248042	peaks1_common	125.733	161.624		Supercontig_12.2	1893357	1896005	NCU06804		6.97423	7.33649	0.36227	gray
Supercontig_12.6	802665	808852	3094	-0.36175	7.04706	0.0031816	peaks1_common	116.662	149.908		Supercontig_12.6	802664	808852	NCU04784		6.86618	7.22794	0.36175	gray
Supercontig_12.7	2943678	2946327	1325	-0.36151	7.1679	0.00251056	peaks1_common	126.865	162.992		Supercontig_12.7	2943677	2946327	NCU02318		6.98714	7.34866	0.36151	gray
Supercontig_12.3	2923935	2926192	1129	-0.36151	7.13546	0.00272655	peaks1_common	124.044	159.368		Supercontig_12.3	2923934	2926192	NCU00183		6.95471	7.31621	0.36151	gray
Supercontig_12.3	4657091	4658449	679.5	-0.36134	10.0421	5.56914e-10	peaks1_common	930.208	1194.96		Supercontig_12.3	4657090	4658449	NCU10210		9.86141	10.2228	0.36134	gray
Supercontig_12.1	2212166	2214400	1117.5	-0.36114	7.08158	0.00292749	peaks1_common	119.512	153.506		Supercontig_12.1	2212165	2214400	NCU01865		6.90101	7.26215	0.36114	gray
Supercontig_12.7	4166232	4167943	856	-0.36015	9.22591	1.14548e-06	peaks1_common	528.528	678.397		Supercontig_12.7	4166231	4167943	NCU05886		9.04584	9.40599	0.36015	gray
Supercontig_12.6	3843165	3845163	999.5	-0.3599	8.93783	5.97322e-06	peaks1_common	432.897	555.553		Supercontig_12.6	3843164	3845163	NCU10697		8.75788	9.11778	0.3599	gray
Supercontig_12.1	5288317	5290695	1189.5	-0.35871	7.32308	0.00185451	peaks1_common	141.409	181.325		Supercontig_12.1	5288316	5290695	NCU03317		7.14373	7.50243	0.35871	gray
Supercontig_12.6	3922009	3924168	1080	-0.35808	8.6001	3.90732e-05	peaks1_common	342.761	439.324		Supercontig_12.6	3922008	3924168	NCU05048		8.42106	8.77914	0.35808	gray
Supercontig_12.4	2254128	2256713	1293	-0.35732	7.2527	0.00218249	peaks1_common	134.741	172.609		Supercontig_12.4	2254127	2256713	NCU07682		7.07404	7.43136	0.35732	gray
Supercontig_12.5	3836116	3837924	904.5	-0.35732	7.2527	0.00218249	peaks1_common	134.741	172.609		Supercontig_12.5	3836115	3837924	NCU01380		7.07404	7.43136	0.35732	gray
Supercontig_12.3	4778023	4779106	542	-0.357	10.1928	1.26767e-10	peaks1_common	1034.22	1324.59		Supercontig_12.3	4778022	4779106	NCU08250		10.0143	10.3713	0.357	gray
Supercontig_12.3	234921	236971	1025.5	-0.35678	10.5296	1.05763e-12	peaks1_common	1306.2	1672.67		Supercontig_12.3	234920	236971	NCU09168		10.3512	10.7079	0.35678	gray
Supercontig_12.7	21491	25060	1785	-0.3565	7.92909	0.000406098	peaks1_common	215.395	275.774		Supercontig_12.7	21490	25060	NCU09300		7.75084	8.10734	0.3565	gray
Supercontig_12.7	2639743	2642464	1361	-0.35623	7.19097	0.00257047	peaks1_common	129.146	165.316		Supercontig_12.7	2639742	2642464	NCU02399		7.01286	7.36908	0.35623	gray
Supercontig_12.4	4532625	4534989	1182.5	-0.35522	7.25776	0.00218249	peaks1_common	135.312	173.089		Supercontig_12.4	4532624	4534989	NCU07281		7.08015	7.43537	0.35522	gray
Supercontig_12.5	4678870	4681856	1493.5	-0.35522	7.25776	0.00218249	peaks1_common	135.312	173.089		Supercontig_12.5	4678869	4681856	NCU01457		7.08015	7.43537	0.35522	gray
Supercontig_12.2	2831269	2835334	2033	-0.35509	7.13922	0.00309736	peaks1_common	124.644	159.428		Supercontig_12.2	2831268	2835334	NCU01643		6.96167	7.31677	0.35509	gray
Supercontig_12.4	201056	202551	748	-0.35492	10.3771	1.41639e-11	peaks1_common	1175.94	1503.93		Supercontig_12.4	201055	202551	NCU07601		10.1996	10.5545	0.35492	gray
Supercontig_12.3	14104	16140	1018.5	-0.3548	10.0982	4.94882e-10	peaks1_common	969.307	1239.56		Supercontig_12.3	14103	16140	NCU09524		9.92081	10.2756	0.3548	gray
Supercontig_12.3	4436088	4437815	864	-0.3548	7.26942	0.00220864	peaks1_common	136.43	174.468		Supercontig_12.3	4436087	4437815	NCU07541		7.09202	7.44682	0.3548	gray
Supercontig_12.3	2489138	2491469	1166	-0.3546	7.18397	0.00288523	peaks1_common	128.593	164.423		Supercontig_12.3	2489137	2491469	NCU00065		7.00667	7.36127	0.3546	gray
Supercontig_12.3	1809408	1813151	1872	-0.35452	7.22734	0.00268884	peaks1_common	132.521	169.436		Supercontig_12.3	1809407	1813151	NCU06183		7.05008	7.4046	0.35452	gray
Supercontig_12.5	4558307	4559728	711	-0.35434	7.15191	0.00279047	peaks1_common	125.778	160.795		Supercontig_12.5	4558306	4559728	NCU09550		6.97474	7.32908	0.35434	gray
Supercontig_12.1	2265841	2267170	665	-0.35426	7.36559	0.00196854	peaks1_common	145.862	186.46		Supercontig_12.1	2265840	2267170	NCU01849		7.18846	7.54272	0.35426	gray
Supercontig_12.5	6064588	6066000	706.5	-0.35413	10.3592	2.05461e-11	peaks1_common	1161.82	1485.05		Supercontig_12.5	6064587	6066000	NCU09966		10.1822	10.5363	0.35413	gray
Supercontig_12.7	3992761	3995298	1269	-0.35399	7.19626	0.00260025	peaks1_common	129.721	165.795		Supercontig_12.7	3992760	3995298	NCU05836		7.01927	7.37326	0.35399	gray
Supercontig_12.4	1808501	1811016	1258	-0.35375	7.30384	0.00206053	peaks1_common	139.775	178.616		Supercontig_12.4	1808500	1811016	NCU06614		7.12697	7.48072	0.35375	gray
Supercontig_12.3	4780591	4781498	454	-0.35372	10.4785	3.51764e-12	peaks1_common	1262.08	1612.75		Supercontig_12.3	4780590	4781498	NCU08251		10.3016	10.6553	0.35372	gray
Supercontig_12.2	2675100	2677131	1016	-0.35357	7.25107	0.00245176	peaks1_common	134.763	172.19		Supercontig_12.2	2675099	2677131	NCU01703		7.07429	7.42786	0.35357	gray
Supercontig_12.7	989341	993463	2061.5	-0.35357	7.25107	0.00245176	peaks1_common	134.763	172.19		Supercontig_12.7	989340	993463	NCU09564		7.07429	7.42786	0.35357	gray
Supercontig_12.1	3265972	3267804	916.5	-0.35348	7.13196	0.00272655	peaks1_common	124.088	158.54		Supercontig_12.1	3265971	3267804	NCU02707		6.95522	7.3087	0.35348	gray
Supercontig_12.3	1301581	1304057	1238.5	-0.35341	7.20844	0.00262991	peaks1_common	130.847	167.167		Supercontig_12.3	1301580	1304057	NCU06409		7.03174	7.38514	0.35341	gray
Supercontig_12.5	1620719	1622127	704.5	-0.35297	7.17694	0.00254057	peaks1_common	128.04	163.532		Supercontig_12.5	1620718	1622127	NCU04578		7.00046	7.35343	0.35297	gray
Supercontig_12.2	4339141	4341666	1263	-0.35287	7.22052	0.00236831	peaks1_common	131.972	168.541		Supercontig_12.2	4339140	4341666	NCU09756		7.04408	7.39696	0.35287	gray
Supercontig_12.3	1140129	1142537	1204.5	-0.35287	7.22052	0.00236831	peaks1_common	131.972	168.541		Supercontig_12.3	1140128	1142537	NCU07862		7.04408	7.39696	0.35287	gray
[truncated: 9,371 more rows]

## Sheet: IAF-3
chr	start	end	summit	M_value	A_value	P_value	Peak_Group	normalized_read_density_in_WT_merged	normalized_read_density_in_crf4-3_merged							log2(WT)	log2(crf4-3)	log2(FC)	k27_col
[truncated: 9,725 more rows]

[truncated: 2 more sheets: IAF-1, IAF-2]
