# Supplementary material for: The ACF chromatin-remodeling complex is essential for Polycomb repression
Source: eLife. 2022 Mar 8;11:e77595. doi: 10.7554/eLife.77595 (PMC9038196; doi:10.7554/eLife.77595)
Supplement: Figure 3—source data 1. [file elife-77595-fig3-data1.xlsx]

## Sheet: acf1
genes	logFC	FDR	Pvalue	acf1	wt	category
NCU00164	-1.74711	0.0130234	0.000430991	5.37999	14.6997	Down
NCU01958	-4.83347	0.000278046	4.71507e-06	0.165087	9.19368	Down
NCU01959	-5.67513	0.000264624	4.46026e-06	0.0753418	9.672	Down
NCU01960	-6.12456	0.00142095	3.0522e-05	0	7.93474	Down
NCU02194	-1.00573	0.015026	0.00051116	22.5173	36.6008	Down
NCU02195	-1.10336	0.0118462	0.000382292	20.4322	35.6462	Down
NCU02196	-1.04106	0.00650219	0.000183104	26.689	44.4992	Down
NCU03469	-1.18049	0.000259791	4.3521e-06	27.8654	51.1215	Down
NCU03470	-1.10145	0.00169316	3.7761e-05	25.8922	45.7448	Down
NCU03472	-1.6871	1.21311e-09	6.73257e-12	24.9152	65.6089	Down
NCU03473	-1.57324	1.21311e-09	6.6087e-12	31.0149	76.7659	Down
NCU03474	-1.70425	1.11524e-09	5.96018e-12	24.5128	64.6603	Down
NCU03475	-2.09618	4.4512e-15	7.31954e-18	22.6077	79.9012	Down
NCU03476	-1.92154	7.85726e-12	2.98786e-14	22.3594	70.0247	Down
NCU03477	-1.56426	1.01525e-06	1.06429e-08	20.5989	49.4354	Down
NCU04502	-1.00715	0.0441729	0.00182503	16.8595	27.4898	Down
NCU04689	-1.55909	1.38662e-11	5.8429e-14	63.6014	157.496	Down
NCU04690	-1.58532	6.64719e-08	5.26036e-10	29.2227	71.9394	Down
NCU04691	-1.62504	5.53905e-07	5.35119e-09	24.9817	63.4741	Down
NCU04694	-2.21087	2.04047e-20	1.25826e-23	28.9377	110.112	Down
NCU04695	-2.14232	5.75452e-15	1.03081e-17	24.5003	88.5788	Down
NCU04697	-1.58173	3.97085e-10	2.08133e-12	33.0416	81.1808	Down
NCU04698	-1.18916	0.00184603	4.28779e-05	20.8624	38.5724	Down
NCU04700	-1.36573	2.81984e-07	2.49236e-09	42.5829	91.8632	Down
NCU04701	-1.33511	2.2732e-08	1.54195e-10	55.0337	115.93	Down
NCU04702	-1.08743	1.13848e-06	1.21687e-08	64.1964	112.539	Down
NCU04703	-1.06637	6.80298e-06	8.25027e-08	62.5486	108.413	Down
NCU04704	-1.21657	1.4103e-06	1.52191e-08	63.205	123.863	Down
NCU04705	-1.01183	0.000348587	6.01877e-06	68.4912	115.032	Down
NCU04710	-1.6661	2.10347e-14	4.75605e-17	44.5657	116.895	Down
NCU04886	-1.41576	5.95459e-08	4.60401e-10	46.6298	101.354	Down
NCU04887	-1.75794	1.38662e-11	5.71799e-14	36.6018	102.583	Down
NCU04897	-1.36793	4.47895e-14	1.19684e-16	76.7937	160.683	Down
NCU04907	-1.47328	5.53905e-07	5.33831e-09	32.6552	73.9602	Down
NCU04908	-1.2461	5.76046e-05	7.7556e-07	29.1861	55.635	Down
NCU04910	-1.07591	0.000170511	2.66369e-06	54.6772	95.8259	Down
NCU04951	-1.13778	0.00510153	0.000138942	25.9357	45.0086	Down
NCU05017	-1.20456	2.49338e-06	2.7932e-08	41.9964	79.9455	Down
NCU05101	-1.03734	6.21899e-05	8.43687e-07	74.7778	128.233	Down
NCU05102	-1.47333	6.76626e-06	8.13286e-08	32.493	75.4901	Down
NCU05131	-1.84137	2.44432e-09	1.48217e-11	26.4169	77.8156	Down
NCU05154	-1.01096	0.0136415	0.000459857	36.1718	60.6371	Down
NCU05156	-1.01978	1.7278e-06	1.88229e-08	68.7773	113.81	Down
NCU05157	-1.49337	1.26604e-07	1.07998e-09	29.4324	67.0791	Down
NCU05158	-1.47581	3.58225e-11	1.58311e-13	57.0971	130.137	Down
NCU05159	-1.50635	3.17064e-07	2.83501e-09	28.4421	65.6859	Down
NCU05177	-1.57746	5.75452e-15	1.06456e-17	59.0304	144.586	Down
NCU05186	-1.58271	1.00135e-06	1.03942e-08	26.8744	64.7526	Down
NCU05187	-1.25206	0.000129973	1.99034e-06	29.388	56.7744	Down
NCU05662	-1.02256	0.00215558	5.12581e-05	34.0213	56.6689	Down
NCU05906	-1.83205	4.23771e-21	2.17765e-24	53.7616	156.851	Down
NCU05907	-2.02817	4.29502e-17	5.73846e-20	28.9559	95.6183	Down
NCU05908	-1.7566	1.47599e-10	7.28133e-13	30.0992	82.5587	Down
NCU05909	-1.5334	3.35865e-13	1.03555e-15	55.4713	131.109	Down
NCU05910	-1.44853	4.22919e-09	2.65139e-11	73.8365	170.18	Down
NCU05911	-1.2458	4.37007e-11	2.06601e-13	98.307	190.819	Down
NCU05912	-1.10292	7.9556e-08	6.37756e-10	91.3244	162.339	Down
NCU05914	-1.08291	0.000902507	1.79945e-05	29.5916	50.7033	Down
NCU05919	-1.29557	1.46883e-09	8.75559e-12	62.8489	126.475	Down
NCU05920	-1.18951	5.1311e-08	3.79691e-10	62.6829	117.409	Down
NCU06154	-1.02867	0.00843407	0.000254843	24.6005	40.3226	Down
NCU06155	-1.10981	0.000782236	1.51141e-05	27.1386	47.3569	Down
NCU06157	-1.19603	7.12545e-05	1.02524e-06	30.3215	56.4597	Down
NCU06159	-1.0339	0.000630598	1.18602e-05	37.0972	60.8837	Down
NCU06229	-1.09425	0.0203815	0.000732163	15.8479	27.228	Down
NCU06420	-1.1511	0.00138509	2.94669e-05	25.8031	46.5166	Down
NCU06887	-1.16509	0.000284254	4.84956e-06	67.7474	130.837	Down
NCU06888	-1.13267	1.12324e-05	1.38529e-07	59.5549	109.875	Down
NCU06898	-1.74876	1.09904e-13	3.04976e-16	42.4233	120.348	Down
NCU06899	-1.37391	8.73552e-12	3.41161e-14	67.8708	145.657	Down
NCU06901	-1.23771	2.58023e-08	1.77673e-10	59.4527	116.156	Down
NCU06902	-1.59587	4.05789e-14	1.04262e-16	50.9545	127.091	Down
NCU06904	-1.50926	8.68909e-09	5.62603e-11	43.2916	102.288	Down
NCU06905	-1.5767	1.48602e-08	9.92719e-11	27.912	69.7092	Down
NCU07048	-1.2385	0.00136106	2.86759e-05	20.7117	40.1004	Down
NCU07049	-1.45308	1.15458e-08	7.59435e-11	47.2234	107.274	Down
NCU07050	-1.10898	6.76626e-06	8.1362e-08	49.5769	88.5846	Down
NCU07051	-1.16133	4.04324e-07	3.73989e-09	57.2369	104.634	Down
NCU07053	-1.41308	5.19306e-08	3.89613e-10	34.0229	73.2476	Down
NCU07054	-1.34884	4.33699e-07	4.05617e-09	32.911	67.8718	Down
NCU07076	-1.11569	6.61675e-05	9.3165e-07	40.2661	72.055	Down
NCU07077	-1.04577	0.000558318	1.02712e-05	34.9746	59.0639	Down
NCU07082	-1.04154	0.00539411	0.000148574	24.6839	40.9572	Down
NCU07083	-1.42349	3.62985e-07	3.32021e-09	30.6825	66.8326	Down
NCU07084	-1.61031	1.72213e-14	3.53984e-17	51.1747	127.029	Down
NCU07086	-1.75814	1.34539e-14	2.62717e-17	36.9015	102.091	Down
NCU07087	-1.31092	5.22256e-08	3.97194e-10	44.7556	90.8397	Down
NCU07088	-1.47813	5.79217e-11	2.79786e-13	42.5272	96.1826	Down
NCU07089	-1.67145	3.9103e-11	1.76828e-13	36.2371	95.3082	Down
NCU07090	-1.57338	7.68692e-13	2.52807e-15	51.7156	127.097	Down
NCU07091	-1.99182	1.49285e-19	1.07399e-22	36.9886	119.611	Down
NCU07092	-1.03476	3.28177e-06	3.84503e-08	75.6096	128.46	Down
NCU07095	-1.06557	5.41624e-07	5.12121e-09	65.6077	112.903	Down
NCU07107	-1.02586	3.22914e-07	2.9205e-09	79.2694	132.434	Down
NCU07109	-2.32923	1.98033e-39	2.03528e-43	53.0941	217.701	Down
NCU07110	-1.48558	1.46883e-09	8.66184e-12	38.9891	88.6686	Down
NCU07111	-1.37347	8.05358e-08	6.53888e-10	40.5999	85.3114	Down
NCU07510	-1.37684	5.95459e-08	4.65107e-10	69.8692	152.886	Down
NCU07623	-1.94408	5.88249e-17	8.46401e-20	33.9262	108.637	Down
NCU07624	-1.51283	2.48843e-13	7.16096e-16	53.1199	124.651	Down
NCU08083	-1.09755	2.15551e-06	2.39255e-08	89.0124	159.496	Down
NCU08085	-1.78267	3.68472e-19	3.02958e-22	52.2287	147.168	Down
NCU08086	-1.37541	6.43336e-13	2.04968e-15	65.2439	137.9	Down
NCU08095	-1.11426	0.000978223	2.02079e-05	26.3095	45.5915	Down
NCU08097	-1.07107	0.000185155	2.94954e-06	39.0709	67.0808	Down
NCU08103	-1.28064	1.01668e-11	4.07509e-14	76.1532	151.096	Down
NCU08188	-1.26131	1.90151e-05	2.41523e-07	35.9236	72.1076	Down
NCU08208	-1.10839	4.69109e-05	6.26764e-07	51.5497	93.9515	Down
NCU08233	-1.01654	0.00169622	3.80036e-05	61.9333	104.188	Down
NCU08521	-1.17651	4.10245e-08	2.99356e-10	65.295	121.192	Down
NCU08522	-1.30007	2.74517e-07	2.39815e-09	53.3175	106.512	Down
NCU08523	-1.71041	1.68841e-11	7.28809e-14	41.6733	110.588	Down
NCU08524	-1.46555	1.47507e-07	1.27344e-09	32.3847	73.6115	Down
NCU08769	-1.04963	0.000409261	7.14662e-06	55.1753	92.9037	Down
NCU08790	-1.09007	0.00010348	1.53146e-06	37.529	64.8989	Down
NCU08799	-1.38433	1.01886e-07	8.37708e-10	47.1798	100.295	Down
NCU08800	-1.36793	1.96781e-05	2.52801e-07	45.3986	94.8357	Down
NCU08801	-1.06267	0.00530409	0.000145549	47.4243	79.8039	Down
NCU08802	-1.24402	0.000465634	8.42257e-06	32.7924	62.7375	Down
NCU08812	-1.19295	0.000197453	3.18603e-06	45.6821	82.8629	Down
NCU08813	-1.34382	2.67243e-06	3.02125e-08	42.6226	86.3756	Down
NCU08814	-1.31194	8.76299e-07	8.9161e-09	46.7718	92.3702	Down
NCU08816	-1.08786	0.00601709	0.000168206	26.3972	45.7165	Down
NCU08818	-1.17609	0.00866427	0.000263579	26.8632	48.7753	Down
NCU08829	-1.87146	2.5658e-10	1.29213e-12	20.7169	61.4417	Down
NCU08830	-2.38176	3.34431e-17	4.12453e-20	19.1826	81.0212	Down
NCU08832	-2.14842	4.28052e-16	6.59895e-19	22.5004	79.6357	Down
NCU08833	-2.42988	2.85023e-23	8.78797e-27	25.4023	111.601	Down
NCU08834	-2.38716	7.80443e-22	3.2084e-25	24.2365	102.083	Down
NCU08835	-2.27016	1.97905e-18	1.83057e-21	24.1484	94.5674	Down
NCU08836	-2.17614	3.58851e-18	3.68809e-21	24.5609	89.8094	Down
NCU08837	-2.09564	3.89567e-14	9.60905e-17	21.4107	73.5405	Down
NCU08838	-1.63201	9.38274e-07	9.6431e-09	18.849	47.7937	Down
NCU08839	-1.31013	0.000522798	9.56403e-06	19.5417	38.8795	Down
NCU08845	-1.37053	1.27732e-05	1.58845e-07	26.4074	55.77	Down
NCU08846	-1.23561	0.000866361	1.69212e-05	23.2859	44.855	Down
NCU08881	-1.16563	0.00142095	3.04441e-05	45.3009	84.7315	Down
NCU08884	-1.04095	0.00258287	6.3709e-05	64.9469	115.403	Down
NCU08918	-1.65872	3.07964e-13	9.17877e-16	49.9998	130.343	Down
NCU08921	-1.41589	8.84717e-06	1.08203e-07	29.4661	64.8751	Down
NCU09027	-1.01292	0.0124839	0.000409287	24.4472	39.8595	Down
NCU09031	-1.42523	7.52515e-07	7.56377e-09	27.423	59.1006	Down
NCU09046	-1.13009	0.00262844	6.53733e-05	23.3282	41.0323	Down
NCU09164	-1.4497	8.26883e-13	2.88942e-15	78.8495	178.521	Down
NCU09274	-1.00397	0.00278403	6.98154e-05	30.3909	48.458	Down
NCU09448	-1.00053	0.171978	0.00921321	13.1394	20.2911	Down
NCU09604	-1.25801	4.0044e-08	2.88086e-10	54.8669	108.694	Down
NCU09627	-1.06165	1.82706e-06	2.0092e-08	63.2467	107.476	Down
NCU09632	-1.44989	2.95608e-10	1.51905e-12	69.2197	158.198	Down
NCU09633	-1.56294	2.10347e-14	4.63629e-17	59.33	144.807	Down
NCU09660	-1.14598	3.0757e-06	3.57198e-08	55.6785	100.376	Down
NCU09663	-1.15007	0.000948677	1.92972e-05	29.0482	52.4386	Down
NCU09698	-1.09252	0.00181451	4.16223e-05	44.1257	79.239	Down
NCU09836	-1.17726	1.04148e-07	8.67006e-10	76.6366	143.478	Down
NCU09839	-1.1764	0.000230642	3.76897e-06	45.1419	83.2428	Down
NCU09937	-1.27336	0.000143142	2.20672e-06	27.6305	54.2805	Down
NCU09939	-1.50697	4.00814e-09	2.47162e-11	50.7347	118.344	Down
NCU09988	-1.26932	0.000108204	1.61249e-06	29.4942	57.0697	Down
NCU09990	-1.28162	7.12545e-05	1.01905e-06	26.1519	51.0695	Down
NCU10344	-1.24057	3.01147e-08	2.10463e-10	51.9791	100.875	Down
NCU10538	-1.52237	5.64091e-09	3.59441e-11	35.5127	82.9888	Down
NCU10539	-1.42604	1.11102e-07	9.36313e-10	36.6608	78.7587	Down
NCU11087	-1.20361	5.56834e-07	5.43671e-09	55.0454	103.152	Down
NCU11129	-1.66214	1.29931e-09	7.34452e-12	30.0085	76.3995	Down
NCU12044	-1.14784	7.52515e-07	7.57929e-09	70.4749	130.122	Down
NCU12045	-2.88475	1.51284e-34	3.10964e-38	21.6492	134.535	Down
NCU12050	-1.4148	3.51023e-08	2.48927e-10	35.9978	77.2605	Down
NCU12051	-1.03407	6.77172e-07	6.68125e-09	66.735	110.985	Down
NCU12067	-1.55436	8.26883e-13	2.81002e-15	43.9901	105.684	Down
NCU12068	-1.53816	1.17456e-12	4.22502e-15	52.0298	125.555	Down
NCU12075	-1.85741	4.22631e-11	1.95462e-13	22.8952	67.2371	Down
NCU12076	-1.69721	5.01126e-12	1.85411e-14	37.8215	101.856	Down
NCU12104	-1.19125	0.00137809	2.91764e-05	21.8791	40.5354	Down
NCU12137	-1.13625	2.26179e-05	2.92894e-07	81.5729	150.924	Down
NCU16307	-1.05935	2.88515e-06	3.29138e-08	67.1348	114.734	Down
NCU16472	-1.21739	0.000571454	1.06303e-05	22.3495	42.5167	Down
NCU16701	-1.01028	0.000740226	1.42263e-05	67.7032	114.611	Down
NCU16702	-1.07508	1.90151e-05	2.42331e-07	62.2635	108.873	Down
NCU16718	-1.14324	1.03646e-06	1.09718e-08	182.922	337.319	Down
NCU16720	-1.6064	3.44205e-14	8.1364e-17	48.3784	119.921	Down
NCU16741	-1.1619	0.000447934	7.93884e-06	28.4435	52.0022	Down
NCU16742	-1.47176	1.46883e-09	8.4815e-12	46.495	105.391	Down
NCU16876	-2.35341	1.47436e-17	1.6668e-20	18.568	77.2187	Down
NCU17064	-1.09735	0.00763595	0.000225719	20.9734	36.1471	Down
NCU17066	-1.21028	0.000249797	4.13333e-06	32.7017	62.2403	Down
NCU17137	-1.1502	0.018782	0.000660167	22.0449	40.5094	Down
NCU17138	-1.40777	0.000409261	7.15049e-06	24.1673	52.5858	Down
NCU17170	-1.0846	6.26269e-05	8.68924e-07	51.6241	91.9981	Down
NCU17172	-1.17715	3.00495e-06	3.45893e-08	47.8311	89.6054	Down
NCU17202	-1.19975	3.55302e-06	4.19935e-08	39.2099	73.3079	Down
NCU17203	-1.02945	0.000457913	8.22028e-06	37.3074	61.8392	Down
NCU17283	-1.00881	0.000119169	1.78815e-06	44.4389	72.9299	Down
NCU00003	-0.0345173	1	1	19.1335	15.8166	Other
NCU00004	-0.291107	1	0.434064	20.6042	20.018	Other
NCU00005	0.219156	1	0.625421	20.322	14.0873	Other
NCU00006	-0.0315838	1	1	20.2419	16.6014	Other
NCU00007	0.161719	1	0.804324	18.9044	13.7682	Other
NCU00008	-0.00371167	1	1	18.8445	15.4177	Other
NCU00009	0.343298	1	0.385694	26.8679	16.5925	Other
NCU00010	0.0328814	1	1	20.3581	16.0244	Other
NCU00011	-0.00220554	1	1	18.9446	15.2516	Other
NCU00013	0.38761	1	0.335578	21.7589	13.4179	Other
NCU00014	0.081175	1	0.908781	21.7292	16.6894	Other
NCU00015	-0.0543308	1	1	18.4551	15.6622	Other
NCU00017	0.18369	1	0.639988	21.7641	15.4526	Other
NCU00018	0.115104	1	0.903601	19.6601	14.6401	Other
NCU00019	-0.0367814	1	1	18.5444	15.1759	Other
NCU00021	0.236904	1	0.614668	19.5894	13.1887	Other
NCU00022	0.0697679	1	0.907565	21.1006	16.1595	Other
NCU00023	0.0387671	1	1	20.0361	15.7344	Other
NCU00024	-0.0678387	1	0.908781	20.4065	17.4179	Other
NCU00025	0.0273073	1	1	19.5893	15.5765	Other
NCU00026	0.038415	1	1	21.124	16.5136	Other
NCU00027	0.140832	1	0.812596	20.7346	15.2199	Other
NCU00028	0.000809084	1	1	20.0998	16.198	Other
NCU00029	0.0173143	1	1	20.2025	16.1721	Other
NCU00030	0.315019	1	0.402983	21.7864	13.9233	Other
NCU00031	-0.154784	1	0.720214	18.3797	16.5957	Other
NCU00032	0.212616	1	0.625421	19.9899	13.9127	Other
NCU00033	-0.352149	1	0.326158	20.7249	21.3523	Other
NCU00034	0.0092746	1	1	19.6259	15.584	Other
NCU00035	0.0243861	1	1	19.5972	15.6331	Other
NCU00037	-0.111949	1	0.807202	18.1465	15.8186	Other
NCU00038	0.141255	1	0.801314	18.6612	13.4272	Other
NCU00039	0.458446	1	0.252872	20.2059	11.7724	Other
NCU00040	0.00837653	1	1	18.2085	14.607	Other
NCU00041	0.210459	1	0.561398	21.791	15.3356	Other
NCU00042	0.148857	1	0.812596	21.4264	15.1764	Other
NCU00043	0.0207129	1	1	18.5541	14.9676	Other
NCU00045	-0.0269167	1	1	19.8139	16.1568	Other
NCU00046	0.0652826	1	0.906298	20.5605	15.873	Other
NCU00047	0.462372	1	0.228419	22.4012	12.9816	Other
NCU00048	-0.100308	1	0.824322	21.8034	18.9068	Other
NCU00050	-0.142778	1	0.72396	19.307	17.0166	Other
NCU00051	0.20104	1	0.712242	19.753	13.8292	Other
NCU00052	0.145172	1	0.72396	20.9604	15.3342	Other
NCU00054	-0.0857194	1	0.904978	19.2514	16.3241	Other
NCU00055	0.102521	1	0.817562	22.0833	16.3479	Other
NCU00056	0.0604191	1	0.903601	19.8808	15.1792	Other
NCU00057	0.299754	1	0.476707	21.5012	14.1	Other
NCU00059	0.261515	1	0.538599	20.0678	13.4136	Other
NCU00060	0.144574	1	0.707991	18.9352	13.7149	Other
NCU00061	0.20248	1	0.635322	20.8607	14.7345	Other
NCU00064	0.125591	1	0.804324	19.1133	14.0207	Other
NCU00065	0.378372	1	0.328451	21.5583	13.1356	Other
NCU00066	0.180636	1	0.707991	19.2105	13.6238	Other
NCU00067	-0.295808	1	0.525789	15.5852	15.4241	Other
NCU00068	0.225816	1	0.544629	20.4266	14.0802	Other
NCU00069	-0.0295341	1	1	22.3015	18.3525	Other
NCU00070	0.147481	1	0.809957	20.3654	14.7062	Other
NCU00071	-0.158271	1	0.660899	22.0885	19.8237	Other
NCU00072	-0.0292445	1	1	18.7614	15.4726	Other
NCU00073	0.138595	1	0.807202	19.6098	14.3175	Other
NCU00074	-0.148478	1	0.727559	19.69	17.7	Other
NCU00075	0.325842	1	0.416006	22.9118	14.6007	Other
NCU00076	-0.0249515	1	1	20.9231	16.9435	Other
NCU00077	0.909442	0.44922	0.0300219	22.0066	9.22262	Other
NCU00078	0.155292	1	0.72396	21.3146	15.4147	Other
NCU00079	0.303131	1	0.4096	22.2598	14.5529	Other
NCU00080	0.22809	1	0.571605	23.3411	16.2965	Other
NCU00081	0.00280893	1	1	20.4979	16.4483	Other
NCU00082	-0.118921	1	0.734354	20.8413	18.2782	Other
NCU00083	0.150399	1	0.815129	21.309	15.5377	Other
NCU00084	0.305872	1	0.4096	22.075	14.2963	Other
NCU00085	0.024995	1	1	19.8264	15.6033	Other
NCU00086	0.34767	1	0.402983	21.7356	13.7939	Other
NCU00087	-0.0311786	1	1	19.0488	15.8317	Other
NCU00088	-0.0217176	1	1	22.6605	18.5298	Other
NCU00089	-0.0978538	1	0.815129	19.8461	17.1378	Other
NCU00090	-0.150415	1	0.737566	21.4653	19.2664	Other
NCU00091	-0.173674	1	0.644479	19.7651	17.9359	Other
NCU00092	0.245038	1	0.544629	20.4103	13.93	Other
NCU00093	0.387717	1	0.401076	16.7373	9.80752	Other
NCU00095	0.160442	1	0.712242	19.7886	14.1018	Other
NCU00096	0.0569321	1	1	21.3371	16.6296	Other
NCU00097	0.245574	1	0.538599	20.7368	13.6751	Other
NCU00099	0.0589604	1	1	13.655	10.4449	Other
NCU00100	0.0246761	1	1	20.8092	16.385	Other
NCU00101	0.251406	1	0.566591	22.694	15.4235	Other
NCU00102	0.146755	1	0.807202	19.7723	14.3477	Other
NCU00103	0.3377	1	0.396144	21.1701	13.4181	Other
NCU00104	-0.0121965	1	1	19.8217	16.143	Other
NCU00105	0.122928	1	0.812596	20.6787	15.3651	Other
NCU00106	-0.00664609	1	1	19.4487	15.7413	Other
NCU00107	-0.143775	1	0.72396	18.7049	16.872	Other
NCU00108	0.142271	1	0.809957	20.1175	14.8486	Other
NCU00109	0.0525045	1	1	19.68	15.3608	Other
NCU00110	0.167768	1	0.716312	20.2701	14.4838	Other
NCU00111	0.0193156	1	1	22.7177	17.8382	Other
NCU00112	0.104466	1	0.807202	19.5393	14.5594	Other
NCU00114	0.0234906	1	1	18.6605	14.8855	Other
NCU00115	-0.10093	1	0.907565	20.3021	17.5498	Other
NCU00116	0.0385604	1	1	20.3061	16.0195	Other
NCU00117	-0.0706732	1	0.906298	19.6483	16.808	Other
NCU00118	0.0614913	1	0.904978	19.9342	15.4223	Other
NCU00119	0.164027	1	0.809957	20.2529	14.6783	Other
NCU00120	0.201557	1	0.635322	21.5292	15.0766	Other
NCU00121	0.00615015	1	1	20.8986	16.7745	Other
NCU00122	-0.0270488	1	1	19.8978	15.9311	Other
NCU00123	-0.281178	1	0.470387	17.5113	17.1843	Other
NCU00124	0.0900378	1	0.903601	19.4604	14.7634	Other
NCU00125	-0.00127464	1	1	18.8038	14.9408	Other
NCU00126	0.024412	1	1	19.8394	15.6184	Other
NCU00127	-0.0540602	1	1	18.7184	15.5175	Other
NCU00128	0.164063	1	0.716312	20.1221	14.5803	Other
NCU00129	0.0222536	1	1	20.2103	15.8188	Other
NCU00130	0.139312	1	0.804324	18.5684	13.9209	Other
NCU00132	-0.0511414	1	1	19.5022	16.3027	Other
NCU00133	0.187494	1	0.727559	21.7799	15.5814	Other
NCU00134	-0.155757	1	0.72396	19.3035	17.3297	Other
NCU00135	-0.127875	1	0.812596	19.0534	16.9266	Other
NCU00136	0.235935	1	0.550429	20.9291	14.3028	Other
NCU00137	0.0640627	1	0.908781	21.5148	16.565	Other
NCU00138	0.0234849	1	1	20.4815	16.2926	Other
NCU00142	0.0807746	1	0.904978	20.1444	15.2611	Other
NCU00143	0.16234	1	0.648806	22.4043	16.3691	Other
NCU00144	-0.112915	1	0.819901	20.6545	18.0962	Other
NCU00145	0.0238447	1	1	19.9735	16.0148	Other
NCU00146	-0.195154	1	0.625421	18.0322	16.1611	Other
NCU00147	-0.00539571	1	1	20.7394	16.6181	Other
NCU00148	0.112495	1	0.902162	19.3483	14.3115	Other
NCU00149	0.136582	1	0.804324	19.323	13.9957	Other
NCU00150	-0.01013	1	1	18.0715	14.7053	Other
NCU00151	0.300912	1	0.402983	21.5459	14.0308	Other
NCU00152	0.17109	1	0.707991	19.1016	13.684	Other
NCU00153	-0.0587531	1	0.903601	19.1072	15.7227	Other
NCU00154	0.0478854	1	1	19.7251	15.3967	Other
NCU00155	-0.0559869	1	1	19.6469	16.2634	Other
NCU00157	-0.224897	1	0.561398	19.0793	17.9385	Other
NCU00158	0.395117	1	0.374169	19.7486	11.9436	Other
NCU00159	0.209938	1	0.630471	20.6681	14.247	Other
NCU00160	0.150323	1	0.703547	18.5715	13.3928	Other
NCU00161	0.0434154	1	1	19.9881	15.7007	Other
NCU00162	0.088708	1	0.817562	21.8464	16.3492	Other
NCU00163	0.0409368	1	1	22.4367	17.4587	Other
NCU00166	-0.114379	1	0.817562	19.7675	17.39	Other
NCU00167	0.169433	1	0.72396	21.2634	15.2979	Other
NCU00168	0.205559	1	0.644479	22.5986	15.6234	Other
NCU00169	-0.0306567	1	1	17.9432	14.8372	Other
NCU00170	0.0256679	1	1	19.5433	15.4845	Other
NCU00171	0.0600494	1	1	19.2067	15.1045	Other
NCU00172	-0.0655216	1	0.907565	20.3376	17.1858	Other
NCU00173	-0.0646378	1	0.913207	23.1258	19.1867	Other
NCU00175	0.0293641	1	1	25.5203	19.9119	Other
NCU00176	-0.13898	1	0.734354	20.7213	18.5833	Other
NCU00177	0.107308	1	0.904978	20.2842	15.2263	Other
NCU00178	-0.0543219	1	1	19.3619	16.2737	Other
NCU00179	0.130574	1	0.809957	20.5513	14.8499	Other
NCU00180	0.0977136	1	0.812596	20.5967	15.4025	Other
NCU00181	0.15301	1	0.804324	19.3049	13.8674	Other
NCU00182	0.00778203	1	1	21.5651	17.2068	Other
NCU00183	0.424158	1	0.321103	20.7422	12.3555	Other
NCU00184	0.138511	1	0.79816	17.6765	12.9238	Other
NCU00185	-0.00849249	1	1	20.0813	16.1204	Other
NCU00186	0.19181	1	0.630471	20.7702	14.5255	Other
NCU00187	-0.0347702	1	1	20.1946	16.7923	Other
NCU00188	0.214015	1	0.625421	20.2175	14.0197	Other
NCU00189	-0.128638	1	0.815129	19.8499	17.1388	Other
NCU00192	0.125846	1	0.812596	20.8463	15.1846	Other
NCU00193	0.198633	1	0.561398	21.9863	15.4725	Other
NCU00194	0.222861	1	0.625421	20.2454	13.9969	Other
NCU00195	-0.0458229	1	1	18.645	15.2791	Other
NCU00196	0.139698	1	0.812596	20.7571	15.2396	Other
NCU00197	-0.149781	1	0.731021	20.561	18.0676	Other
NCU00198	-0.21486	1	0.556015	18.8544	17.5312	Other
NCU00199	0.0829488	1	0.902162	19.0402	14.5117	Other
NCU00200	0.109139	1	0.807202	19.5272	14.5103	Other
NCU00201	0.217075	1	0.630471	20.8929	14.374	Other
NCU00202	0.143497	1	0.812596	20.5968	15.1485	Other
NCU00203	0.0295973	1	1	20.8151	16.4458	Other
NCU00204	-0.0115783	1	1	21.0417	17.0532	Other
NCU00205	0.164884	1	0.807202	19.7107	14.1357	Other
NCU00206	0.147128	1	0.712242	19.5112	14.1075	Other
NCU00207	-0.0475821	1	1	19.6352	16.0069	Other
NCU00208	0.324895	1	0.463836	20.5626	13.2943	Other
NCU00209	0.0244988	1	1	20.0252	15.9045	Other
NCU00210	0.226041	1	0.635322	21.3705	14.697	Other
NCU00211	0.362196	1	0.396144	21.5047	13.3913	Other
NCU00212	-0.067298	1	0.909951	21.2474	17.9106	Other
NCU00213	0.0376906	1	1	19.4294	15.1711	Other
NCU00214	0.0708383	1	0.904978	19.7183	15.5631	Other
NCU00215	-0.226475	1	0.550429	18.2209	17.0655	Other
NCU00216	0.134637	1	0.819901	22.8243	16.5261	Other
NCU00218	-0.323937	1	0.337424	22.0255	22.3045	Other
NCU00219	0.204786	1	0.707991	19.3107	13.3259	Other
NCU00220	0.0467116	1	1	22.3694	17.2889	Other
NCU00221	0.109339	1	0.902162	19.2751	14.2827	Other
NCU00222	-0.0283843	1	1	18.466	15.247	Other
NCU00223	0.0260067	1	1	19.9185	15.9354	Other
NCU00224	0.183461	1	0.716312	20.6691	14.1708	Other
NCU00225	0.131194	1	0.804324	19.2202	13.9895	Other
NCU00226	0.152157	1	0.809957	20.2394	14.7005	Other
NCU00227	0.153012	1	0.716312	20.0764	14.4663	Other
NCU00229	-0.115935	1	0.822153	21.195	18.5699	Other
NCU00230	-0.188147	1	0.635322	18.669	17.1811	Other
NCU00231	0.200876	1	0.703547	18.8763	13.0712	Other
NCU00232	0.175755	1	0.79816	18.094	12.9202	Other
NCU00233	-0.127843	1	0.812596	18.8441	16.7772	Other
NCU00234	-0.0375375	1	1	18.6582	15.5416	Other
NCU00236	-0.0547522	1	0.907565	20.6821	16.9473	Other
NCU00237	0.0622032	1	0.902162	18.7858	14.5338	Other
NCU00238	0.0423821	1	1	19.711	15.3755	Other
NCU00239	0.216184	1	0.698894	18.1413	12.5616	Other
NCU00240	0.201326	1	0.720214	20.8072	14.5983	Other
NCU00241	0.143486	1	0.801314	18.6598	13.4382	Other
NCU00242	0.200698	1	0.614668	18.8976	13.2309	Other
NCU00243	-0.0775131	1	0.903601	18.3176	15.6532	Other
NCU00244	0.157456	1	0.644479	21.653	15.907	Other
NCU00245	0.631201	1	0.11749	19.9838	10.4998	Other
NCU00246	-0.186011	1	0.644479	19.5593	18.191	Other
NCU00247	-0.126468	1	0.743657	21.9583	19.6152	Other
NCU00248	-0.0162413	1	1	19.1369	15.6215	Other
NCU00249	0.0429693	1	1	19.139	14.8612	Other
NCU00250	-0.169403	1	0.716312	17.9804	16.1667	Other
NCU00251	0.0989834	1	0.807202	19.4143	14.5543	Other
NCU00252	-0.094051	1	0.906298	19.2479	16.7463	Other
NCU00253	0.199344	1	0.707991	19.2257	13.3821	Other
NCU00254	0.168331	1	0.720214	20.4849	14.9093	Other
NCU00257	0.390908	1	0.374169	19.5235	11.7951	Other
NCU00258	-0.0363936	1	1	18.8243	15.5476	Other
NCU00259	0.326164	1	0.380023	25.4515	16.5206	Other
NCU00260	0.14315	1	0.716312	19.8381	14.5748	Other
NCU00261	-0.131735	1	0.716312	18.205	16.0375	Other
NCU00262	-0.0646255	1	1	22.5922	19.2592	Other
NCU00263	0.0275079	1	1	18.5116	14.6107	Other
NCU00264	0.0211475	1	1	20.6673	16.7628	Other
NCU00265	0.309172	1	0.457038	20.2629	13.0183	Other
NCU00267	0.00551174	1	1	22.481	18.3431	Other
NCU00268	-0.145969	1	0.731021	19.8872	17.8858	Other
NCU00269	0.0860442	1	0.904978	20.3414	15.3628	Other
NCU00270	0.0980403	1	0.815129	21.3262	15.9098	Other
NCU00271	-0.387108	1	0.240818	21.1811	22.5168	Other
NCU00272	0.1513	1	0.809957	20.4605	14.6878	Other
NCU00273	0.234935	1	0.620158	19.6752	13.3699	Other
NCU00274	0.0957232	1	0.903601	19.6719	14.831	Other
NCU00275	-0.0442251	1	1	21.3002	17.7128	Other
NCU00276	0.148508	1	0.720214	20.4727	14.8239	Other
NCU00277	0.18485	1	0.707991	18.5118	13.2733	Other
NCU00278	-0.114428	1	0.809957	18.872	16.2934	Other
NCU00279	0.198941	1	0.635322	21.2233	14.8021	Other
NCU00280	0.201391	1	0.703547	18.6591	12.9526	Other
NCU00281	0.25777	1	0.620158	19.7933	13.2512	Other
NCU00282	0.0177234	1	1	20.8529	16.7618	Other
NCU00283	-0.136287	1	0.727559	19.5408	17.4205	Other
NCU00284	-0.256157	1	0.434064	20.5565	19.7094	Other
NCU00285	-0.0862869	1	0.907565	20.2124	17.3197	Other
NCU00287	-0.0893843	1	0.903601	18.1377	15.8652	Other
NCU00288	-0.0847534	1	0.909951	20.9884	17.9838	Other
NCU00289	-0.0849306	1	0.904978	18.6599	16.1084	Other
NCU00290	0.00819522	1	1	21.1376	16.7876	Other
NCU00291	0.143627	1	0.801314	18.5351	13.5292	Other
NCU00292	0.444475	1	0.267831	20.9771	12.3366	Other
NCU00293	0.116089	1	0.804324	18.9777	14.0878	Other
NCU00294	0.102332	1	0.906298	20.9533	15.585	Other
NCU00295	-0.0221712	1	1	21.863	18.0233	Other
NCU00296	0.103953	1	0.812596	20.1313	15.3825	Other
NCU00297	0.176938	1	0.65298	23.3105	16.6215	Other
NCU00298	0.0574457	1	1	19.0562	14.7104	Other
NCU00299	0.232051	1	0.556015	21.5768	14.856	Other
NCU00300	0.02574	1	1	20.632	16.3093	Other
NCU00301	0.0607675	1	1	19.0391	14.632	Other
NCU00302	0.227907	1	0.556015	21.2985	14.7633	Other
NCU00303	-0.0724986	1	0.908781	20.4447	17.4257	Other
NCU00304	-0.0538079	1	1	20.663	17.1785	Other
NCU00305	0.239528	1	0.556015	21.8852	15.046	Other
NCU00306	0.278602	1	0.544629	20.7636	13.6704	Other
NCU00307	0.128896	1	0.727559	21.6916	15.9002	Other
NCU00308	0.197842	1	0.625421	20.1361	14.0224	Other
NCU00309	-0.0434609	1	1	19.4357	16.1265	Other
NCU00310	0.174392	1	0.716312	19.9238	14.2086	Other
NCU00311	0.01895	1	1	18.2824	14.4607	Other
NCU00312	0.0343772	1	1	22.1427	17.3728	Other
NCU00313	0.420294	1	0.313521	20.2197	11.953	Other
NCU00314	0.260798	1	0.556015	21.6101	14.7457	Other
NCU00315	-0.0813148	1	0.908781	20.6848	17.6838	Other
NCU00316	-0.190802	1	0.639988	18.9435	17.3869	Other
NCU00317	0.096431	1	0.902162	19.2881	14.5254	Other
NCU00318	0.0101523	1	1	19.8207	16.0423	Other
NCU00319	-0.0719382	1	0.911076	22.0029	18.6296	Other
NCU00320	0.0418329	1	1	19.4324	15.252	Other
NCU00321	0.172366	1	0.720214	20.8875	14.9763	Other
NCU00322	-0.292355	1	0.439728	20.6326	20.5574	Other
NCU00324	-0.0195237	1	1	18.2151	14.9994	Other
NCU00325	0.11238	1	0.815129	21.2458	15.7679	Other
NCU00326	-0.0499566	1	0.906298	19.7518	16.42	Other
NCU00327	0.00750574	1	1	22.726	18.188	Other
NCU00329	-0.103334	1	0.807202	18.3267	15.7374	Other
NCU00330	0.183656	1	0.712242	20.0246	13.975	Other
NCU00331	0.188156	1	0.707991	19.3399	13.6168	Other
NCU00332	0.0955475	1	0.900657	18.6193	14.0635	Other
NCU00333	-0.127639	1	0.804324	17.6337	15.5043	Other
NCU00334	0.151321	1	0.801314	18.4859	13.3178	Other
NCU00335	-0.0184022	1	1	21.259	17.2992	Other
NCU00336	0.156756	1	0.707991	18.6849	13.5449	Other
NCU00337	0.25985	1	0.538599	20.5924	13.6693	Other
NCU00338	-0.0842972	1	0.904978	19.4046	16.3513	Other
NCU00339	0.164977	1	0.720214	20.8049	14.8534	Other
NCU00340	-0.0862247	1	0.904978	19.3108	16.3863	Other
NCU00343	-0.153164	1	0.737566	21.0095	19.0271	Other
NCU00344	0.074152	1	1	20.2835	15.5999	Other
NCU00345	0.153227	1	0.815129	21.5809	15.5387	Other
NCU00346	0.0379302	1	1	20.3634	15.9602	Other
NCU00347	0.000752459	1	1	20.2312	16.0955	Other
NCU00348	-0.0163238	1	1	21.4939	17.7426	Other
NCU00349	0.022821	1	1	20.9275	16.6681	Other
NCU00350	0.0985226	1	0.902162	18.9136	14.4224	Other
NCU00351	0.162579	1	0.734354	23.5137	16.6551	Other
NCU00352	-0.0259213	1	1	20.3342	16.7636	Other
NCU00353	-0.286969	1	0.428229	19.9274	19.5839	Other
NCU00354	-0.00336998	1	1	22.6712	18.9877	Other
NCU00355	0.0167638	1	1	20.2751	16.2496	Other
NCU00356	-0.0283973	1	1	19.3602	15.9396	Other
NCU00357	0.147919	1	0.817562	22.1336	15.9452	Other
NCU00358	0.0479814	1	1	20.3117	15.7975	Other
NCU00359	0.104276	1	0.904978	20.2447	15.1448	Other
NCU00360	0.0544637	1	1	20.6342	16.0664	Other
NCU00361	-0.00955416	1	1	20.9346	16.8006	Other
NCU00362	0.0626837	1	0.908781	21.7908	16.7139	Other
NCU00363	0.202415	1	0.635322	21.4399	14.9361	Other
NCU00364	-0.021676	1	1	17.1478	14.0853	Other
NCU00365	0.0839178	1	0.904978	19.6042	15.2461	Other
NCU00366	0.172063	1	0.727559	21.962	15.6054	Other
NCU00367	0.317352	1	0.457038	20.6406	13.0618	Other
NCU00368	0.254699	1	0.544629	20.4267	13.7603	Other
NCU00369	0.215284	1	0.635322	21.2306	14.7838	Other
NCU00370	0.122115	1	0.809957	19.5031	14.8309	Other
NCU00371	0.13605	1	0.801314	18.6142	13.5913	Other
NCU00372	0.0382154	1	1	20.0211	15.6263	Other
NCU00373	-0.0395675	1	1	19.2537	15.8418	Other
NCU00375	0.206492	1	0.576449	23.7193	16.7246	Other
NCU00376	-0.13282	1	0.809957	18.3097	16.1825	Other
NCU00377	0.13824	1	0.716312	19.9973	14.6596	Other
NCU00378	0.30202	1	0.463836	20.3582	13.3765	Other
NCU00379	0.0910701	1	0.809957	19.6475	14.9496	Other
NCU00380	-0.0103112	1	1	20.6956	16.5849	Other
NCU00382	0.0346642	1	1	21.2025	16.6277	Other
NCU00384	-0.108158	1	0.824322	22.3924	18.9374	Other
NCU00385	0.306701	1	0.422212	22.4413	14.9653	Other
NCU00386	-0.124905	1	0.815129	19.4347	17.0321	Other
NCU00387	0.0506906	1	1	20.9906	16.2747	Other
NCU00388	0.10161	1	0.904978	20.1082	15.1673	Other
NCU00389	0.0816037	1	0.906298	20.6425	15.6605	Other
NCU00391	-0.469224	1	0.206757	18.1276	20.0117	Other
NCU00392	-0.002075	1	1	20.0615	16.1295	Other
NCU00395	0.304515	1	0.476707	21.8403	14.1933	Other
NCU00396	-0.0911175	1	0.903601	18.4016	15.7123	Other
NCU00397	0.090936	1	0.906298	20.861	15.7676	Other
NCU00398	-0.0533964	1	1	19.5077	16.2009	Other
NCU00399	-0.435231	1	0.241665	17.4773	19.0551	Other
NCU00400	-0.0546633	1	1	21.355	17.7836	Other
NCU00401	0.12083	1	0.815129	21.118	15.6793	Other
NCU00403	-0.165743	1	0.648806	20.181	18.3528	Other
NCU00404	-0.100328	1	0.906298	19.3557	16.8698	Other
NCU00405	0.268042	1	0.544629	20.4681	13.7731	Other
NCU00406	-0.00960126	1	1	18.6946	15.2632	Other
NCU00407	0.105038	1	0.906298	20.5451	15.6039	Other
NCU00408	-0.353146	1	0.31433	19.8715	20.2125	Other
NCU00409	-0.0168216	1	1	20.5799	16.5909	Other
NCU00410	0.030642	1	1	22.1142	17.5198	Other
NCU00411	0.0192522	1	1	20.1065	15.9513	Other
NCU00412	0.0472309	1	0.904978	19.8593	15.4929	Other
NCU00413	0.0970792	1	0.906298	20.232	15.5425	Other
NCU00414	-0.169552	1	0.727559	19.3739	17.6626	Other
NCU00415	-0.0408869	1	1	19.284	16.1166	Other
NCU00416	-0.00518621	1	1	22.1973	17.7968	Other
NCU00417	0.15149	1	0.731021	22.0853	16.0263	Other
NCU00418	-0.219556	1	0.561398	19.1866	18.0054	Other
NCU00419	-0.317231	1	0.374198	20.1961	20.3639	Other
NCU00420	-0.00542586	1	1	19.2639	15.5666	Other
NCU00421	0.122288	1	0.809957	20.5924	15.0255	Other
NCU00422	-0.098937	1	0.902162	18.0343	15.5933	Other
NCU00423	0.0861694	1	0.904978	20.3243	15.3994	Other
NCU00424	0.0771546	1	0.904978	20.1297	15.3993	Other
NCU00425	0.53436	1	0.175303	21.8667	12.001	Other
NCU00426	-0.155646	1	0.716312	18.3752	16.4253	Other
NCU00427	-0.00624467	1	1	18.7097	15.2175	Other
NCU00428	0.246518	1	0.550429	21.4702	14.4552	Other
NCU00430	0.0296465	1	1	21.1087	16.6095	Other
NCU00431	0.145241	1	0.72396	21.2376	15.3779	Other
NCU00432	-0.0162988	1	1	18.8209	15.3531	Other
NCU00434	0.00685324	1	1	20.812	16.8652	Other
NCU00435	0.0484027	1	0.908781	21.392	16.8962	Other
NCU00436	0.117368	1	0.902162	19.4835	14.3655	Other
NCU00437	0.22013	1	0.625421	20.6368	14.0943	Other
NCU00438	-0.0232884	1	1	17.7861	14.3312	Other
NCU00439	-0.0788948	1	0.908781	20.7693	17.5221	Other
NCU00440	-0.180019	1	0.72396	18.8178	17.286	Other
NCU00441	0.0160936	1	1	21.0458	16.8013	Other
NCU00442	0.0614047	1	0.907565	20.905	16.2029	Other
NCU00443	-0.0238148	1	1	19.5747	16.2802	Other
NCU00444	0.0280761	1	1	19.5422	15.4134	Other
NCU00445	0.100135	1	0.900657	18.357	13.7628	Other
NCU00446	-0.182894	1	0.635322	18.6895	17.0379	Other
NCU00447	-0.0604385	1	1	19.6738	16.4022	Other
NCU00448	0.157219	1	0.720214	20.8091	14.8091	Other
NCU00449	0.150159	1	0.720214	20.3881	14.9744	Other
NCU00450	0.0574765	1	0.908781	21.2947	16.7654	Other
NCU00451	-0.0693917	1	0.909951	21.0365	17.8868	Other
NCU00453	-0.0423879	1	1	19.1284	15.8373	Other
NCU00454	0.0400146	1	1	19.4905	15.1927	Other
NCU00455	0.0486123	1	1	19.1842	14.9025	Other
NCU00456	-0.331312	1	0.320317	20.7646	20.8569	Other
NCU00457	0.0667582	1	0.902162	18.8416	14.4181	Other
NCU00458	0.0162532	1	1	21.4006	17.0992	Other
NCU00459	0.116784	1	0.807202	19.4176	14.3717	Other
NCU00461	-0.0973747	1	0.904978	19.0534	16.3206	Other
NCU00462	0.232781	1	0.499917	23.5866	16.2703	Other
NCU00463	0.211403	1	0.571605	23.2318	16.118	Other
NCU00464	0.0589689	1	1	21.9336	17.0742	Other
NCU00465	0.183573	1	0.644479	21.988	15.6639	Other
NCU00466	0.31281	1	0.470387	21.4902	13.8266	Other
NCU00467	-0.0836054	1	0.906298	19.2228	16.6565	Other
NCU00468	-0.00592779	1	1	21.2782	17.237	Other
NCU00469	0.161131	1	0.712242	19.2458	13.8919	Other
NCU00470	0.0883003	1	0.904978	19.8983	15.1588	Other
NCU00471	-0.146043	1	0.727559	19.4035	17.4856	Other
NCU00472	-0.103726	1	0.906298	19.3803	16.8057	Other
NCU00473	0.0808873	1	0.908781	21.6316	16.5186	Other
NCU00474	0.01069	1	1	19.7583	15.9146	Other
NCU00475	-0.103323	1	0.812596	19.4181	16.7231	Other
NCU00476	0.116907	1	0.819901	22.6422	16.7021	Other
NCU00477	-0.0226401	1	1	23.2138	18.831	Other
NCU00478	-0.0988053	1	0.907565	20.0368	17.3307	Other
NCU00480	0.121524	1	0.812596	20.4716	15.2661	Other
NCU00481	-0.0102902	1	1	19.2366	15.557	Other
NCU00483	0.0254541	1	1	19.9029	15.9173	Other
NCU00484	0.249185	1	0.544629	20.3929	13.9812	Other
NCU00485	-0.574287	0.853782	0.0701979	22.6076	27.1039	Other
NCU00486	-0.0394223	1	1	20.6967	17.2262	Other
NCU00487	0.0113427	1	1	20.3254	16.3105	Other
NCU00488	0.115501	1	0.906298	20.7621	15.5212	Other
NCU00489	-0.400651	1	0.260448	18.9209	20.4065	Other
NCU00490	0.10401	1	0.906298	21.0859	15.6097	Other
NCU00491	-0.334989	1	0.362054	19.8242	19.7072	Other
NCU00492	-0.117662	1	0.819901	20.4907	18.0119	Other
NCU00493	-0.0361942	1	1	19.5681	16.3483	Other
NCU00494	-0.0746409	1	0.906298	19.6155	16.6329	Other
NCU00495	0.0320302	1	1	20.5062	15.9793	Other
NCU00496	0.0776955	1	1	21.4184	16.3771	Other
NCU00497	0.0802376	1	0.906298	20.4623	15.6472	Other
NCU00498	-0.0367138	1	1	20.1501	16.6048	Other
NCU00499	0.114645	1	0.904978	20.6407	15.1136	Other
NCU00500	-0.075523	1	0.824322	21.9973	18.689	Other
NCU00501	0.141315	1	0.809957	20.7197	14.8309	Other
NCU00502	0.000437976	1	1	19.2517	15.4175	Other
NCU00503	0.136745	1	0.804324	19.133	14.0395	Other
NCU00504	-0.18983	1	0.712242	17.5902	15.9187	Other
NCU00505	-0.114937	1	0.807202	17.5935	15.5573	Other
NCU00506	-0.302086	1	0.439728	20.3462	20.5461	Other
NCU00509	0.119345	1	0.826413	23.8882	17.768	Other
NCU00510	-0.443423	1	0.229888	19.2009	21.8794	Other
NCU00512	-0.0825546	1	0.902162	18.4045	15.5184	Other
NCU00513	-0.0939712	1	0.904978	19.2557	16.1951	Other
NCU00515	-0.142164	1	0.712242	17.7186	15.658	Other
NCU00516	-0.266749	1	0.470387	17.3265	16.8719	Other
NCU00517	0.215834	1	0.630471	20.7844	14.4916	Other
NCU00518	0.26059	1	0.488703	23.3788	15.4176	Other
NCU00519	-0.27333	1	0.532325	16.5923	15.7496	Other
NCU00520	0.00943695	1	1	19.7499	15.7744	Other
NCU00521	-0.226453	1	0.571605	20.2488	19.0927	Other
NCU00522	0.0784994	1	0.903601	19.4496	14.815	Other
NCU00523	-0.124806	1	0.807202	18.3229	15.932	Other
NCU00524	0.21319	1	0.703547	18.8053	12.8354	Other
NCU00525	-0.231929	1	0.556015	18.5815	17.7737	Other
NCU00526	0.156171	1	0.703547	18.1686	13.1747	Other
NCU00527	-0.00498493	1	1	20.663	16.8378	Other
NCU00528	0.0178432	1	1	18.7169	14.9719	Other
NCU00529	0.0711286	1	1	23.7025	17.8667	Other
NCU00530	0.361684	1	0.285001	31.4508	19.6669	Other
NCU00531	-0.139553	1	0.743657	22.6682	20.0029	Other
NCU00532	0.259912	1	0.450571	26.434	17.612	Other
NCU00533	0.370934	1	0.251348	28.5963	17.9584	Other
NCU00534	-0.150769	1	0.720214	18.627	16.6549	Other
NCU00535	-0.13265	1	0.720214	18.5821	16.5327	Other
NCU00536	-0.000845476	1	1	18.7729	15.3584	Other
NCU00537	-0.408576	1	0.260448	19.3681	20.6793	Other
NCU00538	-0.073788	1	1	18.853	15.9917	Other
NCU00541	-0.0458688	1	1	18.2902	15.3134	Other
NCU00542	0.038763	1	1	19.1185	14.9182	Other
NCU00545	0.11654	1	0.791373	16.9164	12.3393	Other
NCU00547	0.442623	1	0.260454	20.7109	12.217	Other
NCU00548	-0.07515	1	0.907565	20.0429	17.1061	Other
NCU00549	0.0102396	1	1	19.6449	15.6853	Other
NCU00550	0.0842878	1	1	19.397	14.5626	Other
NCU00551	-0.12628	1	0.720214	18.9136	16.4799	Other
NCU00552	-0.24585	1	0.499917	20.2895	19.4927	Other
NCU00553	0.0420302	1	1	20.7405	16.2712	Other
NCU00554	0.10809	1	0.819901	22.3036	16.6782	Other
NCU00556	0.114243	1	0.89908	18.211	13.4568	Other
NCU00557	0.0477644	1	1	20.9367	16.6063	Other
NCU00558	0.0114746	1	1	19.2663	15.1035	Other
NCU00559	0.139362	1	0.807202	19.3926	14.1934	Other
NCU00560	-0.088423	1	0.897426	16.7203	14.1819	Other
NCU00561	-0.0637033	1	1	18.0741	15.4995	Other
NCU00562	0.286038	1	0.44998	19.4936	12.7233	Other
NCU00563	-0.0792906	1	0.817562	20.5574	17.3904	Other
NCU00564	-0.276586	1	0.482808	18.5035	18.0146	Other
NCU00565	0.0873368	1	0.812596	20.5526	15.5056	Other
NCU00566	0.2534	1	0.544629	20.6507	13.9486	Other
NCU00567	-0.0771995	1	0.904978	19.2069	16.4027	Other
NCU00568	-0.0161551	1	1	19.2304	15.3369	Other
NCU00569	-0.027872	1	1	20.1017	16.3414	Other
NCU00570	-0.151588	1	0.72396	18.9116	17.0257	Other
NCU00571	-0.241554	1	0.482808	18.7795	17.8198	Other
NCU00572	0.0819235	1	0.904978	20.5709	15.2105	Other
NCU00573	0.0708044	1	0.906298	20.5777	15.6806	Other
NCU00574	-0.372559	1	0.246132	21.616	23.1504	Other
NCU00575	-0.000445706	1	1	20.1861	16.1921	Other
NCU00576	-0.0623562	1	0.903601	18.9876	15.7186	Other
NCU00577	-0.126324	1	0.809957	18.7885	16.2791	Other
NCU00578	0.078614	1	0.897426	17.426	13.2181	Other
NCU00579	0.0805548	1	0.902162	19.1286	14.6005	Other
NCU00580	-0.0509966	1	1	21.2971	17.6527	Other
NCU00581	0.0953424	1	0.902162	19.3193	14.4554	Other
NCU00582	-0.186029	1	0.644479	19.528	17.9556	Other
NCU00583	0.13314	1	0.815129	21.0961	15.5884	Other
NCU00584	-0.0156358	1	1	19.494	15.7114	Other
NCU00585	0.046789	1	1	21.4862	16.4794	Other
NCU00586	-0.0602711	1	0.909951	21.0773	17.9365	Other
NCU00587	-0.124285	1	0.817562	20.3534	17.8368	Other
NCU00589	-0.0644019	1	0.907565	20.2558	17.2455	Other
NCU00590	-0.0345611	1	1	20.9288	17.4339	Other
NCU00591	0.189759	1	0.720214	20.9532	14.6543	Other
NCU00592	-0.026762	1	1	19.5069	15.5617	Other
NCU00593	-0.0552134	1	0.904978	19.4332	16.2115	Other
NCU00594	-0.249038	1	0.515447	21.3458	20.6943	Other
NCU00595	-0.108889	1	0.906298	19.4585	16.8989	Other
NCU00596	0.151954	1	0.731021	21.7676	16.0064	Other
NCU00597	0.100041	1	0.906298	20.5512	15.6071	Other
NCU00598	0.0616279	1	0.909951	22.8009	17.236	Other
NCU00599	0.126191	1	0.807202	19.8755	14.4208	Other
NCU00600	-0.188041	1	0.635322	18.5115	16.9797	Other
NCU00602	0.209113	1	0.630471	20.8148	14.5331	Other
NCU00603	-0.0153039	1	1	18.48	15.0024	Other
NCU00604	0.0597304	1	1	20.0024	15.5933	Other
NCU00605	-0.0733676	1	0.904978	19.08	16.1748	Other
NCU00606	0.0767882	1	0.907565	21.3076	16.305	Other
NCU00607	0.0693331	1	0.913207	23.6945	18.2159	Other
NCU00608	0.0748834	1	1	18.0585	13.8512	Other
NCU00609	-0.242986	1	0.488703	19.5763	18.5102	Other
NCU00611	0.681884	0.40881	0.0265537	39.7171	20.3961	Other
NCU00614	-0.0573805	1	1	19.1915	15.835	Other
NCU00616	-0.0783983	1	0.907565	20.2468	17.2932	Other
NCU00617	0.144307	1	0.807202	19.7221	14.2984	Other
NCU00618	-0.0721001	1	0.909951	21.2256	18.0894	Other
NCU00619	0.161698	1	0.716312	19.9352	14.4326	Other
NCU00620	0.165805	1	0.703547	18.5634	13.1137	Other
NCU00621	0.103598	1	0.904978	20.4154	15.1399	Other
NCU00622	-0.0218961	1	1	19.2049	15.6899	Other
NCU00623	-0.0451202	1	0.907565	20.6593	17.0599	Other
NCU00624	-0.152987	1	0.734354	21.0473	18.7327	Other
NCU00627	-0.149203	1	0.727559	19.5335	17.5384	Other
NCU00628	-0.00679129	1	1	20.5	16.4909	Other
NCU00629	-0.0994543	1	0.902162	18.016	15.494	Other
NCU00630	-0.0307154	1	1	20.2551	16.7829	Other
NCU00631	0.0263632	1	1	20.3583	15.9609	Other
NCU00632	-0.0371458	1	1	21.2648	17.6902	Other
NCU00633	-0.0566926	1	0.906298	19.7298	16.7399	Other
NCU00634	-0.0521947	1	1	21.091	17.4207	Other
NCU00635	0.00697604	1	1	20.748	16.7032	Other
NCU00636	0.150385	1	0.716312	19.9132	14.4877	Other
NCU00638	0.0541069	1	1	23.3118	17.8022	Other
NCU00640	0.339904	1	0.342492	21.4592	13.9451	Other
NCU00641	0.442935	1	0.267831	20.5866	12.6239	Other
NCU00642	-0.0853262	1	0.812596	19.4654	16.5087	Other
NCU00643	-0.0090768	1	1	19.7741	15.8844	Other
NCU00644	0.170799	1	0.716312	19.8673	14.268	Other
NCU00645	-0.0181571	1	1	20.3093	16.6954	Other
NCU00646	-0.135934	1	0.815129	19.1546	17.1733	Other
NCU00648	0.0473348	1	1	19.3938	14.9346	Other
NCU00649	-0.0667127	1	0.906298	19.8061	16.7757	Other
NCU00650	0.185684	1	0.707991	19.1946	13.6477	Other
NCU00651	-0.107857	1	0.904978	18.7591	16.345	Other
NCU00652	-0.0513512	1	0.89908	17.165	14.2799	Other
NCU00653	0.00871452	1	1	21.0167	16.7394	Other
NCU00654	0.0226956	1	1	20.3263	16.1152	Other
NCU00655	0.182801	1	0.644479	22.3082	15.812	Other
NCU00656	0.184523	1	0.716312	20.0746	14.269	Other
NCU00657	0.0372945	1	1	19.5651	15.0741	Other
NCU00658	0.027055	1	1	19.46	15.3201	Other
NCU00659	-0.00525297	1	1	18.9688	15.5382	Other
NCU00660	0.439691	1	0.252872	19.8218	11.8306	Other
NCU00662	0.0812294	1	0.908781	21.8375	16.6994	Other
NCU00663	-0.199739	1	0.561398	19.5755	17.8452	Other
NCU00664	0.246746	1	0.550429	21.0778	14.3384	Other
NCU00665	0.0610133	1	0.906298	20.4608	15.9608	Other
NCU00666	0.0464697	1	1	20.0135	15.7555	Other
NCU00667	-0.268704	1	0.439728	20.375	20.0992	Other
NCU00668	-0.0163052	1	1	18.4	14.9948	Other
NCU00669	0.0596729	1	1	19.8057	15.1704	Other
NCU00670	-0.228004	1	0.581133	21.0129	19.8662	Other
NCU00671	0.0133485	1	1	20.5904	16.336	Other
NCU00673	-0.064586	1	1	19.4163	16.4527	Other
NCU00674	-0.0766604	1	0.906298	19.8282	16.6255	Other
NCU00675	0.132182	1	0.79816	18.1632	13.1969	Other
NCU00676	0.409857	1	0.321103	20.556	12.4411	Other
NCU00677	0.136197	1	0.809957	20.0683	14.591	Other
NCU00678	0.183443	1	0.716312	19.9747	14.2205	Other
NCU00679	0.0235011	1	1	19.4283	15.4759	Other
NCU00680	0.0232561	1	1	18.7631	15.0294	Other
NCU00681	0.137323	1	0.812596	20.7739	15.1981	Other
NCU00682	0.0450519	1	1	20.7661	16.2323	Other
NCU00684	-0.0117031	1	1	20.0216	16.0822	Other
NCU00685	-0.0459611	1	1	20.6319	17.0948	Other
NCU00687	-0.0249616	1	1	18.5792	15.1249	Other
NCU00688	0.139836	1	0.72396	20.9451	15.4328	Other
NCU00689	-0.0978918	1	0.807202	18.569	15.6158	Other
NCU00690	0.0889958	1	0.904978	19.9703	15.0838	Other
NCU00691	-0.11341	1	0.812596	19.1117	16.5856	Other
NCU00692	0.325669	1	0.457038	20.4255	12.8658	Other
NCU00693	0.295841	1	0.442643	18.9839	12.3738	Other
NCU00694	0.0163065	1	1	19.3032	15.2348	Other
NCU00695	0.151733	1	0.712242	19.4664	14.0832	Other
NCU00696	0.137681	1	0.807202	19.4028	14.2919	Other
NCU00697	-0.0274408	1	1	20.2331	16.5475	Other
NCU00698	0.235385	1	0.550429	21.4001	14.4784	Other
NCU00699	0.0297669	1	1	19.2433	14.9876	Other
NCU00700	0.155934	1	0.72396	21.3875	15.3124	Other
NCU00701	-0.0284656	1	1	20.9567	17.2197	Other
NCU00704	0.259427	1	0.482808	22.3819	14.9719	Other
NCU00705	0.00483263	1	1	19.2209	15.7933	Other
NCU00706	0.0622599	1	0.908781	21.5886	16.7518	Other
NCU00707	0.11471	1	0.804324	19.3715	14.0897	Other
NCU00708	0.0905101	1	0.904978	20.1917	15.3565	Other
NCU00709	0.412989	1	0.305695	19.635	11.7893	Other
NCU00710	0.12693	1	0.804324	19.1408	14.0795	Other
NCU00711	0.157485	1	0.712242	19.2529	13.8908	Other
NCU00712	0.256963	1	0.532325	19.784	13.2462	Other
NCU00713	0.13746	1	0.804324	18.7809	13.7051	Other
NCU00714	-0.118665	1	0.809957	18.6518	16.2341	Other
NCU00715	0.0545567	1	1	22.078	16.9071	Other
NCU00716	-0.14333	1	0.737566	20.7991	18.7336	Other
NCU00717	-0.147634	1	0.72396	18.9034	17.0056	Other
NCU00718	0.21045	1	0.625421	20.204	14.157	Other
NCU00719	-0.248365	1	0.550429	18.001	17.2329	Other
NCU00720	-0.185043	1	0.635322	18.8006	17.1047	Other
NCU00721	-0.138368	1	0.720214	18.8586	16.6326	Other
NCU00722	-0.126732	1	0.804324	17.6934	15.5221	Other
NCU00723	0.00596034	1	1	20.1523	16.3636	Other
NCU00724	0.253283	1	0.614668	19.0986	12.868	Other
NCU00725	0.287083	1	0.476707	22.1612	14.5432	Other
NCU00726	-0.22319	1	0.635322	18.3003	17.285	Other
NCU00727	0.258222	1	0.556015	21.3474	14.6822	Other
NCU00728	-0.136976	1	0.72396	19.1676	16.916	Other
NCU00729	-0.0719702	1	1	20.8037	17.8412	Other
NCU00730	0.0191996	1	1	20.7017	16.4518	Other
NCU00732	0.0163797	1	1	21.0512	16.5968	Other
NCU00733	0.109241	1	0.809957	19.8972	14.9361	Other
NCU00734	-0.15812	1	0.809957	18.1948	16.4234	Other
NCU00735	0.457503	1	0.260454	20.4527	12.1219	Other
NCU00736	0.370342	1	0.381751	19.558	12.3723	Other
NCU00737	0.21293	1	0.625421	19.8469	13.7513	Other
NCU00738	0.0256091	1	1	19.8443	15.7422	Other
NCU00739	-0.209821	1	0.525037	22.5922	21.4379	Other
NCU00740	-0.159317	1	0.807202	18.0575	16.0192	Other
NCU00741	0.148597	1	0.716312	20.0066	14.593	Other
NCU00742	0.0591559	1	0.903601	19.438	15.1205	Other
NCU00743	-0.0339968	1	1	19.3674	16.0604	Other
NCU00744	-0.0396164	1	1	20.0291	16.4608	Other
NCU00745	0.279284	1	0.428229	23.221	15.7227	Other
NCU00746	0.657975	0.613168	0.044869	30.8502	16.4896	Other
NCU00747	0.846502	0.160137	0.00837718	35.4734	16.5349	Other
NCU00748	-0.0529336	1	1	20.9559	17.3511	Other
NCU00749	-0.175216	1	0.644479	19.7283	17.7975	Other
NCU00751	-0.00916764	1	1	21.2014	17.2653	Other
NCU00752	-0.00894517	1	1	17.9297	14.2844	Other
NCU00753	0.281714	1	0.550429	21.6457	14.1567	Other
NCU00754	-0.168298	1	0.648806	20.0834	18.2843	Other
NCU00755	0.0388035	1	1	19.67	15.3326	Other
NCU00756	-0.017449	1	1	19.3009	15.8392	Other
NCU00757	0.248074	1	0.561398	21.8877	15.1277	Other
NCU00758	0.214124	1	0.635322	21.0053	14.6051	Other
NCU00759	-0.0176897	1	1	19.43	15.8185	Other
NCU00760	-0.0892207	1	0.819901	20.747	18.0066	Other
NCU00761	-0.0363573	1	1	19.9789	16.5547	Other
NCU00762	0.145541	1	0.720214	20.6862	15.0213	Other
NCU00763	0.463813	1	0.187482	25.7989	15.5266	Other
NCU00764	0.826584	0.232259	0.0131765	43.7238	21.5393	Other
NCU00765	0.460458	1	0.174403	27.4516	16.8918	Other
NCU00766	0.0714615	1	0.904978	20.2564	15.5059	Other
NCU00768	0.108235	1	0.900657	18.7669	13.8064	Other
NCU00770	0.119249	1	0.809957	20.3787	15.0185	Other
NCU00771	-0.0643655	1	1	18.8201	15.895	Other
NCU00772	0.182685	1	0.720214	20.7403	14.7847	Other
NCU00773	0.130207	1	0.801314	18.6276	13.6731	Other
NCU00774	-0.122123	1	0.812596	19.0071	16.6127	Other
NCU00775	0.123388	1	0.72396	20.9263	15.6151	Other
NCU00776	0.424194	1	0.35816	18.7717	11.056	Other
NCU00777	0.283295	1	0.525789	19.1431	12.5755	Other
NCU00778	0.108679	1	0.907565	21.2861	15.9063	Other
NCU00779	0.193914	1	0.639988	21.7895	15.2472	Other
NCU00780	-0.0517338	1	1	19.6419	16.3722	Other
NCU00781	0.485698	1	0.200698	23.8889	13.8029	Other
NCU00782	0.123146	1	0.807202	19.7771	14.4579	Other
NCU00783	0.664499	0.837614	0.0681298	23.2163	11.6834	Other
NCU00784	0.0106929	1	1	19.3822	15.3451	Other
NCU00786	0.127356	1	0.79816	17.8671	13.1349	Other
NCU00787	0.204485	1	0.712242	19.6871	13.7545	Other
NCU00788	0.060083	1	1	18.2589	14.3257	Other
NCU00789	0.0143914	1	1	18.8152	14.8714	Other
NCU00790	0.0783536	1	0.900657	18.2438	14.0057	Other
NCU00792	-0.0726839	1	0.906298	19.693	16.8311	Other
NCU00793	0.00818577	1	1	20.1049	16.1121	Other
NCU00794	0.123069	1	0.809957	20.2174	14.9554	Other
NCU00795	0.239803	1	0.544629	20.7509	13.9784	Other
NCU00796	0.00280539	1	1	18.821	15.2465	Other
NCU00797	0.147911	1	0.731021	21.8209	16.0267	Other
NCU00798	0.383664	1	0.335578	21.4303	13.3268	Other
NCU00799	0.192206	1	0.635322	20.9322	14.855	Other
NCU00800	0.00851027	1	1	20.2189	16.1113	Other
NCU00801	0.0674022	1	0.900657	18.3101	14.1521	Other
NCU00802	0.13969	1	0.801314	18.3392	13.3349	Other
NCU00803	0.0991578	1	0.815129	20.722	15.7209	Other
NCU00804	-0.311068	1	0.422212	19.1253	19.1368	Other
NCU00805	-0.121269	1	0.815129	19.5051	17.093	Other
NCU00806	-0.215637	1	0.561398	19.5272	18.0494	Other
NCU00807	-0.310948	1	0.36821	19.4423	19.6716	Other
NCU00808	-0.119797	1	0.819901	20.5868	18.1128	Other
NCU00809	0.0278438	1	1	20.097	15.8729	Other
NCU00810	0.0486721	1	1	20.6025	15.8807	Other
NCU00811	0.260595	1	0.538599	19.9788	13.3941	Other
NCU00812	0.346162	1	0.44998	19.3374	12.251	Other
NCU00813	0.19708	1	0.620158	19.3613	13.6076	Other
NCU00814	0.0490703	1	1	18.7069	14.6945	Other
NCU00817	0.160478	1	0.804324	19.3928	13.8186	Other
NCU00818	0.124747	1	0.809957	20.1227	14.8586	Other
NCU00819	0.216534	1	0.590055	25.1233	17.7659	Other
NCU00821	-0.0186842	1	1	19.721	16.2016	Other
NCU00822	0.137865	1	0.815129	21.0995	15.4796	Other
NCU00823	-0.0427514	1	1	19.144	15.8794	Other
NCU00824	-0.0547175	1	1	19.1447	16.0272	Other
NCU00825	0.135276	1	0.804324	19.1401	14.0276	Other
NCU00826	0.191029	1	0.630471	20.0749	14.4278	Other
NCU00827	0.0633642	1	0.900657	18.1491	14.0512	Other
NCU00828	-0.0771346	1	1	16.8869	14.555	Other
NCU00829	0.0415311	1	1	16.2593	12.7127	Other
NCU00830	-0.139687	1	0.731021	20.1577	17.9736	Other
NCU00831	-0.110285	1	0.801314	17.2795	14.922	Other
NCU00832	0.0446421	1	1	21.3835	16.6061	Other
NCU00833	0.048102	1	1	19.7019	15.4426	Other
NCU00834	0.00894905	1	1	18.3915	14.6809	Other
NCU00835	0.130805	1	0.720214	20.4897	15.043	Other
NCU00836	0.3762	1	0.335578	21.7042	13.4109	Other
NCU00837	0.453329	1	0.260454	21.014	12.2839	Other
NCU00838	-0.0700683	1	0.903601	18.815	15.7515	Other
NCU00839	0.0726684	1	0.902162	19.0814	14.4668	Other
NCU00840	-0.464958	1	0.0929673	30.2225	32.8721	Other
NCU00841	-0.36734	1	0.198166	32.598	32.3788	Other
NCU00842	0.137264	1	0.754665	27.6391	19.6879	Other
NCU00843	0.164996	1	0.720214	20.5846	14.7505	Other
NCU00844	-0.179953	1	0.731021	20.0193	18.2653	Other
NCU00845	0.297937	1	0.525789	19.3551	12.4713	Other
NCU00846	-0.0266272	1	1	18.6854	15.2477	Other
NCU00847	0.158512	1	0.79816	18.3651	13.0861	Other
NCU00848	0.144131	1	0.807202	19.8309	14.4439	Other
NCU00849	-0.151393	1	0.734354	20.0294	18.2914	Other
NCU00850	0.0456225	1	0.911076	22.5209	17.7723	Other
NCU00851	-0.0344909	1	1	16.0957	13.2306	Other
NCU00852	0.586909	1	0.114269	22.298	12.1621	Other
NCU00853	-0.010403	1	1	18.711	15.1563	Other
NCU00854	0.155253	1	0.815129	21.1999	15.4231	Other
NCU00855	0.0812528	1	0.907565	21.3876	16.088	Other
NCU00856	0.0467391	1	1	18.5794	14.4193	Other
NCU00857	0.126076	1	0.801314	18.4541	13.4397	Other
NCU00859	0.104348	1	0.903601	19.9556	14.848	Other
NCU00860	-0.0144355	1	1	19.2694	15.5022	Other
NCU00861	0.140148	1	0.812596	20.82	15.0662	Other
NCU00862	-0.132284	1	0.817562	19.772	17.7007	Other
NCU00863	0.28469	1	0.457038	20.0047	13.1078	Other
NCU00864	-0.0796702	1	0.904978	19.3827	16.3359	Other
NCU00865	-0.255843	1	0.550429	17.9116	17.1956	Other
NCU00866	-0.162521	1	0.731021	20.0746	18.2289	Other
NCU00867	-0.137963	1	0.815129	19.3224	17.3121	Other
NCU00868	-0.0943538	1	0.817562	20.0843	17.3569	Other
NCU00869	-0.117356	1	0.812596	19.3497	16.6914	Other
NCU00870	-0.0792823	1	0.903601	18.6062	15.8215	Other
NCU00871	0.140694	1	0.804324	19.2479	14.052	Other
NCU00872	-0.0573624	1	0.903601	19.098	15.7473	Other
NCU00873	-0.174841	1	0.625421	17.6805	16.0237	Other
NCU00874	-0.0458016	1	1	19.0047	15.6986	Other
NCU00875	0.157868	1	0.812596	20.9031	15.112	Other
NCU00876	0.104347	1	0.902162	19.2349	14.2842	Other
NCU00877	-0.355736	1	0.362054	19.2675	19.6869	Other
NCU00878	-0.402971	1	0.233222	23.9246	25.6847	Other
NCU00879	-0.168773	1	0.644479	19.8322	17.879	Other
NCU00880	0.128957	1	0.807202	19.8063	14.5827	Other
NCU00881	-0.0792669	1	0.900657	17.6225	15.0037	Other
NCU00882	-0.0767606	1	0.907565	20.3527	17.3574	Other
NCU00883	0.101162	1	0.819901	22.5244	16.6978	Other
NCU00884	0.0519916	1	1	19.7531	15.2318	Other
NCU00885	0.13297	1	0.809957	20.2834	14.8891	Other
NCU00886	0.0955591	1	0.809957	20.0348	15.0202	Other
NCU00887	-0.0172183	1	1	21.3427	17.5539	Other
NCU00889	-0.0195824	1	1	19.5574	16.0732	Other
NCU00890	0.133757	1	0.900657	18.7348	13.6702	Other
NCU00891	0.317239	1	0.44998	19.626	12.5896	Other
NCU00892	0.206781	1	0.716312	20.46	14.2203	Other
NCU00893	0.0915787	1	0.900657	18.5686	13.9227	Other
NCU00894	0.124486	1	0.801314	18.484	13.6448	Other
NCU00895	-0.0998783	1	0.904978	18.9542	16.2536	Other
NCU00896	-0.0679082	1	1	19.7502	16.8737	Other
NCU00897	0.314272	1	0.442643	18.9215	12.1744	Other
NCU00898	0.00793159	1	1	17.533	14.083	Other
NCU00899	0.16636	1	0.72396	21.2506	15.2772	Other
NCU00900	0.119795	1	0.807202	19.4277	14.446	Other
NCU00901	-0.139364	1	0.72396	19.5161	17.2059	Other
NCU00902	0.116907	1	0.902162	19.3727	14.2994	Other
NCU00903	-0.0122669	1	1	21.5544	17.4712	Other
NCU00904	-0.00384833	1	1	18.8309	15.3036	Other
NCU00905	0.0337116	1	1	18.0157	14.2801	Other
NCU00906	0.205488	1	0.625421	20.2267	14.0107	Other
NCU00907	0.294083	1	0.494402	23.5244	15.4234	Other
NCU00911	0.0529495	1	1	21.7089	16.9674	Other
NCU00912	0.119589	1	0.815129	20.8948	15.7093	Other
NCU00913	0.170388	1	0.720214	20.517	14.6409	Other
NCU00914	0.0474795	1	1	19.7424	15.4362	Other
NCU00915	-0.232114	1	0.561398	19.346	18.2069	Other
NCU00916	-0.108648	1	0.812596	19.4314	16.6889	Other
NCU00917	0.121184	1	0.812596	20.7717	15.3909	Other
NCU00918	0.166498	1	0.720214	21.0293	14.7253	Other
NCU00919	0.151239	1	0.712242	19.7031	14.1178	Other
NCU00920	0.125523	1	0.900657	18.7606	13.7396	Other
NCU00921	-0.0328398	1	1	21.6336	18.049	Other
NCU00922	0.178784	1	0.639988	21.497	15.2309	Other
NCU00923	0.290135	1	0.476707	21.488	14.2391	Other
NCU00924	0.0405415	1	1	19.5478	15.243	Other
NCU00925	0.302372	1	0.470387	21.0682	13.7397	Other
NCU00926	0.154475	1	0.804324	19.1842	13.9144	Other
NCU00927	0.15891	1	0.716312	20.2027	14.5017	Other
NCU00928	0.0495434	1	1	19.2697	15.0618	Other
NCU00929	0.252784	1	0.544629	20.6401	13.9043	Other
NCU00930	0.322574	1	0.402983	21.4132	13.7805	Other
NCU00931	0.089553	1	0.903601	19.8134	14.9349	Other
NCU00932	-0.0690281	1	0.906298	19.7326	16.6557	Other
NCU00934	0.172898	1	0.731021	23.2176	15.9918	Other
NCU00935	0.201489	1	0.712242	19.8868	13.873	Other
NCU00936	0.183755	1	0.648806	22.854	16.3518	Other
NCU00937	-0.00977376	1	1	19.5928	15.7956	Other
NCU00938	-0.162498	1	0.731021	19.9116	18.2484	Other
NCU00939	-0.0613987	1	0.904978	19.3593	16.2536	Other
NCU00940	-0.140221	1	0.819901	20.4799	18.2512	Other
NCU00941	0.0103762	1	1	18.8122	15.0205	Other
NCU00943	-0.139231	1	0.720214	18.8305	16.5043	Other
NCU00944	-0.0189916	1	1	18.3337	14.751	Other
NCU00945	0.0924904	1	0.906298	20.8731	15.716	Other
NCU00946	0.221805	1	0.571605	23.3177	16.248	Other
NCU00947	0.316389	1	0.385694	25.4893	16.8313	Other
NCU00948	-0.141854	1	0.746547	23.0895	20.5234	Other
NCU00949	-0.00410719	1	1	18.9564	15.2616	Other
NCU00950	-0.00509893	1	1	19.7756	15.999	Other
NCU00951	0.1686	1	0.720214	20.6609	14.8433	Other
NCU00952	-0.0449637	1	0.906298	20.1034	16.5498	Other
NCU00953	0.186604	1	0.703547	18.2712	12.8586	Other
NCU00954	-0.0275072	1	1	20.9116	17.0746	Other
NCU00955	0.049553	1	1	22.2889	17.3502	Other
NCU00956	-0.0939941	1	0.817562	20.4263	17.3676	Other
NCU00957	-0.0805817	1	0.815129	19.7515	16.8773	Other
NCU00958	0.0389896	1	1	19.2362	14.88	Other
NCU00959	0.255075	1	0.544629	20.0909	13.8259	Other
NCU00960	0.185779	1	0.707991	19.1116	13.5061	Other
NCU00961	0.0113268	1	1	22.1268	17.9417	Other
NCU00962	0.16111	1	0.712242	19.3017	13.9395	Other
NCU00963	0.0156532	1	1	21.9034	17.2707	Other
NCU00964	0.0948151	1	0.907565	21.3201	16.1501	Other
NCU00965	-0.0800421	1	0.906298	19.3174	16.6391	Other
NCU00966	0.0256855	1	1	20.4422	16.372	Other
NCU00967	0.024493	1	1	19.993	15.9685	Other
NCU00968	-0.00850692	1	1	21.3498	17.3604	Other
NCU00969	0.150926	1	0.727559	21.6976	15.9015	Other
NCU00970	0.285973	1	0.463836	20.6961	13.4987	Other
NCU00971	0.0676442	1	0.909951	22.3576	17.1736	Other
NCU00972	0.0774223	1	0.906298	20.8568	15.8413	Other
NCU00973	0.370476	1	0.335578	21.0527	13.3495	Other
NCU00974	-0.013384	1	1	20.1419	16.2557	Other
NCU00975	0.214419	1	0.639988	22.2602	15.2045	Other
NCU00976	-0.22522	1	0.515447	21.9038	20.8748	Other
NCU00977	0.443828	1	0.200698	23.4638	14.015	Other
NCU00978	0.0514205	1	0.907565	20.9837	16.435	Other
NCU00979	-0.101016	1	0.824322	22.4289	19.1451	Other
NCU00980	0.0086246	1	1	20.8757	16.7642	Other
NCU00981	0.0161399	1	1	19.2578	15.5578	Other
NCU00983	0.0406606	1	0.911076	22.5143	17.7842	Other
NCU00984	-0.165617	1	0.648806	20.3728	18.467	Other
NCU00985	0.173536	1	0.639988	21.6158	15.3905	Other
NCU00986	-0.0141198	1	1	24.4145	19.7446	Other
NCU00987	-0.100114	1	0.822153	21.1222	18.3645	Other
NCU00988	0.211834	1	0.620158	19.4953	13.4432	Other
NCU00989	-0.150076	1	0.731021	19.7315	17.9532	Other
NCU00990	-0.0198569	1	1	20.0925	16.4137	Other
NCU00992	-0.0794683	1	0.911076	21.6077	18.6251	Other
NCU00993	-0.446005	1	0.226845	21.6441	23.6273	Other
NCU00994	-0.748583	0.321408	0.0196544	22.613	31.0288	Other
NCU00995	-0.842281	0.185685	0.0101144	20.219	29.681	Other
NCU00998	-0.0819476	1	0.902162	18.3577	15.5525	Other
NCU00999	0.343148	1	0.396144	20.784	13.2445	Other
NCU01000	0.170605	1	0.712242	19.7403	14.237	Other
NCU01001	0.236569	1	0.625421	19.5773	13.6665	Other
NCU01002	0.105653	1	0.900657	18.4854	13.8516	Other
NCU01003	-0.39928	1	0.281999	16.8016	17.7744	Other
NCU01004	0.0446832	1	1	18.5822	14.4847	Other
NCU01005	0.278202	1	0.488703	22.6482	15.259	Other
NCU01006	0.112931	1	0.809957	19.8992	14.8571	Other
NCU01007	0.215078	1	0.620158	19.6848	13.427	Other
NCU01008	-0.174907	1	0.639988	19.3657	17.5309	Other
NCU01009	-0.0190895	1	1	19.4748	15.8667	Other
NCU01010	0.025616	1	1	19.7082	15.4845	Other
NCU01011	0.266001	1	0.532325	19.779	13.0124	Other
NCU01012	0.089818	1	0.903601	19.4889	14.6957	Other
NCU01013	0.141492	1	0.815129	21.1736	15.6929	Other
NCU01014	0.562536	1	0.148049	22.3986	12.4253	Other
NCU01015	0.130974	1	0.804324	18.7463	13.7839	Other
NCU01016	-0.167979	1	0.720214	18.6604	16.9003	Other
NCU01017	-0.360218	1	0.396144	16.8473	17.5505	Other
NCU01019	0.218664	1	0.625421	20.4986	14.0882	Other
NCU01021	0.120943	1	0.895687	16.7849	12.5961	Other
NCU01022	0.232778	1	0.620158	19.2428	13.3734	Other
NCU01023	-0.0369126	1	1	18.7223	15.2653	Other
NCU01024	0.180926	1	0.707991	19.4834	13.587	Other
NCU01025	0.0542131	1	1	17.6736	13.6202	Other
NCU01026	0.116367	1	0.807202	19.4906	14.6059	Other
NCU01027	0.267643	1	0.544629	21.1483	13.6089	Other
NCU01032	-0.0316992	1	1	19.0802	15.735	Other
NCU01033	0.301729	1	0.44998	19.6277	12.7318	Other
NCU01034	-0.346538	1	0.326158	20.2516	21.343	Other
NCU01036	0.197898	1	0.635322	20.9553	14.7678	Other
NCU01038	0.0215941	1	1	18.1044	14.2605	Other
NCU01039	-0.107129	1	0.809957	18.8457	16.3037	Other
NCU01041	-0.0733138	1	1	18.6469	15.5071	Other
NCU01042	0.207801	1	0.630471	21.2183	14.4816	Other
NCU01043	-0.0854029	1	0.904978	19.0747	16.3396	Other
NCU01044	-0.0143538	1	1	18.2702	14.8353	Other
NCU01045	-0.0848879	1	0.903601	18.6061	15.9531	Other
NCU01047	0.0893812	1	0.89908	17.7484	13.5261	Other
NCU01048	0.255404	1	0.544629	20.2855	13.77	Other
NCU01049	0.209129	1	0.698894	18.3417	12.6336	Other
NCU01050	0.270133	1	0.476707	21.3212	14.422	Other
NCU01051	0.0740118	1	0.906298	20.9079	15.7466	Other
NCU01052	0.0725537	1	1	18.8942	14.3022	Other
NCU01053	0.161698	1	0.712242	19.7471	14.0345	Other
NCU01054	-0.0179596	1	1	20.4098	16.6444	Other
NCU01055	0.0769806	1	0.904978	20.1993	15.2804	Other
NCU01056	0.179662	1	0.630471	20.3282	14.548	Other
NCU01057	0.187918	1	0.712242	19.6987	13.7956	Other
NCU01058	0.0517249	1	1	20.7111	16.1648	Other
NCU01059	0.16759	1	0.712242	19.464	13.9527	Other
NCU01060	-0.291929	1	0.381768	25.0106	24.8358	Other
NCU01061	-0.00131554	1	1	25.4892	20.7355	Other
NCU01063	0.178358	1	0.65298	22.9021	16.6468	Other
NCU01064	-0.139864	1	0.817562	19.9649	17.7752	Other
NCU01065	0.128331	1	0.809957	19.7033	14.9267	Other
NCU01066	-0.0156415	1	1	18.875	15.4589	Other
NCU01067	0.0849688	1	0.906298	19.9378	15.6003	Other
NCU01068	-0.0466541	1	1	18.9565	15.8067	Other
NCU01069	-0.0479825	1	1	20.4844	17.1517	Other
NCU01070	-0.181793	1	0.644479	19.7577	18.2211	Other
NCU01071	-0.00685612	1	1	17.6258	14.2136	Other
NCU01072	-0.12952	1	0.72396	19.3163	17.0255	Other
NCU01073	0.0509819	1	0.907565	20.8171	16.3779	Other
NCU01074	-0.23125	1	0.576449	20.5532	19.5654	Other
NCU01075	-0.198638	1	0.648806	20.0986	18.6659	Other
NCU01076	0.340414	1	0.396144	21.1376	13.6277	Other
NCU01077	0.194057	1	0.625421	19.9023	14.0307	Other
NCU01078	-0.0839205	1	0.906298	19.2736	16.7545	Other
NCU01079	-0.0794949	1	0.822153	21.3079	18.3905	Other
NCU01080	0.301627	1	0.511857	18.168	11.6395	Other
NCU01081	-0.0934954	1	0.907565	19.8315	17.1437	Other
NCU01082	0.243074	1	0.625421	20.1425	13.7299	Other
NCU01083	0.00726635	1	1	17.507	13.965	Other
NCU01084	0.0969074	1	0.900657	18.8199	14.1336	Other
NCU01085	0.10609	1	0.900657	18.4277	13.8107	Other
NCU01086	0.232742	1	0.625421	20.5946	13.9304	Other
NCU01087	0.0306844	1	1	17.4387	13.7789	Other
NCU01088	0.205365	1	0.639988	22.1562	15.2464	Other
NCU01089	0.119755	1	0.809957	20.0913	14.9704	Other
NCU01090	0.241196	1	0.499917	24.0958	16.1689	Other
NCU01091	0.296558	1	0.439728	25.3271	16.5855	Other
NCU01092	0.311858	1	0.36821	24.024	15.7523	Other
NCU01093	0.351628	1	0.311484	33.6771	20.9453	Other
NCU01094	0.214267	1	0.712242	19.8547	13.6651	Other
NCU01095	0.200262	1	0.630471	20.4715	14.3044	Other
NCU01096	0.116717	1	0.817562	21.8	16.1317	Other
NCU01097	0.138	1	0.716312	19.8788	14.6141	Other
NCU01098	0.195912	1	0.712242	19.3388	13.69	Other
NCU01099	0.197324	1	0.703547	18.5335	12.9354	Other
NCU01100	0.0968957	1	0.900657	18.8088	14.017	Other
NCU01101	-0.0685016	1	0.902162	18.1756	15.2605	Other
NCU01102	0.114384	1	0.79816	17.803	13.1434	Other
NCU01103	-0.385276	1	0.272293	20.3755	21.5102	Other
NCU01104	0.27698	1	0.532325	19.4972	12.8684	Other
NCU01105	0.0492211	1	1	18.5657	14.4007	Other
NCU01106	-0.128758	1	0.812596	18.835	16.7934	Other
NCU01107	0.100594	1	0.906298	20.2216	15.5006	Other
NCU01108	-0.0439878	1	1	18.4448	15.356	Other
NCU01109	0.0450794	1	1	22.3567	17.4211	Other
NCU01111	0.165856	1	0.707991	19.0326	13.5425	Other
NCU01112	0.0876612	1	0.822153	23.0902	17.2093	Other
NCU01113	0.00993801	1	1	22.0521	17.733	Other
NCU01114	0.0763137	1	0.908781	21.6044	16.4527	Other
NCU01115	-0.0626186	1	0.906298	19.6149	16.5759	Other
NCU01116	-0.0415696	1	1	18.9748	15.4636	Other
NCU01118	0.0760308	1	0.906298	21.0154	15.8925	Other
NCU01119	0.11255	1	0.812596	20.4305	15.228	Other
NCU01120	0.282521	1	0.470387	21.2065	13.9823	Other
NCU01121	0.0458964	1	1	20.3087	15.8219	Other
NCU01122	0.03084	1	1	19.0066	14.8624	Other
NCU01123	0.150655	1	0.801314	18.6387	13.6141	Other
NCU01124	-0.0569342	1	0.907565	20.0576	16.9928	Other
NCU01127	-0.187938	1	0.598431	23.3298	21.6967	Other
NCU01132	-0.0187656	1	1	18.5945	14.979	Other
NCU01134	0.170971	1	0.703547	18.2175	13.0325	Other
NCU01135	0.0108931	1	1	19.8373	15.8397	Other
NCU01136	0.000141791	1	1	22.3347	17.785	Other
NCU01138	-0.274601	1	0.538599	16.8882	16.3449	Other
NCU01140	-0.0439817	1	1	19.4985	16.2572	Other
NCU01141	0.0949137	1	0.904978	20.0299	15.215	Other
NCU01142	-0.060212	1	1	18.3052	15.3224	Other
NCU01143	0.155399	1	0.801314	18.447	13.3653	Other
NCU01144	0.334541	1	0.442643	18.8789	12.1391	Other
NCU01145	-0.196787	1	0.625421	17.3724	16.2125	Other
NCU01146	0.00889954	1	1	19.4475	15.5556	Other
NCU01147	-0.134472	1	0.720214	19.0611	16.6435	Other
NCU01148	-0.0614095	1	1	20.2137	16.8279	Other
NCU01149	-0.0454143	1	1	19.051	15.7294	Other
NCU01150	0.224491	1	0.625421	20.4154	14.0285	Other
NCU01151	0.0195842	1	1	18.9418	14.9731	Other
NCU01153	-0.461716	1	0.27501	15.6772	17.9321	Other
NCU01154	0.142339	1	0.812596	20.9482	15.2455	Other
NCU01156	0.13008	1	0.801314	18.7032	13.6815	Other
NCU01157	0.0795129	1	0.903601	19.5309	14.9112	Other
NCU01158	0.101101	1	0.807202	19.7122	14.6239	Other
NCU01159	0.0663392	1	0.911076	23.0966	17.6576	Other
NCU01160	0.0191539	1	1	21.7666	17.2263	Other
NCU01161	0.0747429	1	0.902162	19.0129	14.54	Other
NCU01162	-0.150845	1	0.720214	18.489	16.5134	Other
NCU01163	0.401231	1	0.260448	24.5521	15.2319	Other
NCU01164	0.0880218	1	0.904978	19.9059	15.1447	Other
NCU01165	0.0335663	1	1	20.2136	16.0996	Other
NCU01166	-0.0112685	1	1	19.5431	15.8485	Other
NCU01167	0.255849	1	0.544629	20.6584	14.02	Other
NCU01169	-0.0798135	1	0.907565	20.0607	17.1512	Other
NCU01170	-0.1101	1	0.807202	18.2938	15.7807	Other
NCU01171	-0.0411146	1	1	17.8389	14.8322	Other
NCU01172	0.212205	1	0.712242	19.5513	13.6841	Other
NCU01173	-0.0838908	1	0.903601	18.7742	16.0291	Other
NCU01174	0.176145	1	0.630471	20.3892	14.6042	Other
NCU01175	-0.290105	1	0.482808	18.7467	18.2933	Other
NCU01176	0.208237	1	0.635322	21.2755	14.712	Other
NCU01177	0.249544	1	0.556015	22.1374	14.9291	Other
NCU01178	0.196985	1	0.635322	21.0594	14.7775	Other
NCU01179	-0.0925772	1	0.817562	20.227	17.3486	Other
NCU01180	-0.194803	1	0.576449	20.8714	19.311	Other
NCU01181	-0.144364	1	0.815129	19.4612	17.3517	Other
NCU01182	0.233241	1	0.625421	20.2531	13.7386	Other
NCU01183	-0.0936159	1	0.817562	20.463	17.3763	Other
NCU01184	0.372191	1	0.321103	20.5089	12.8174	Other
NCU01185	0.393573	1	0.313521	20.1752	12.3172	Other
NCU01186	0.328724	1	0.463836	20.6211	13.3252	Other
NCU01187	0.0223197	1	1	20.193	15.8538	Other
NCU01188	0.145321	1	0.807202	19.5605	14.3488	Other
NCU01189	-0.0867321	1	0.906298	19.6296	16.8209	Other
NCU01190	0.288519	1	0.44998	19.5001	12.6717	Other
NCU01191	0.0597852	1	1	20	15.2555	Other
NCU01192	0.189963	1	0.720214	20.7397	14.7406	Other
NCU01193	-0.0637126	1	0.904978	19.2319	16.1635	Other
NCU01195	0.15795	1	0.712242	19.4264	14.0744	Other
NCU01196	0.231104	1	0.639988	22.0113	15.0159	Other
NCU01197	0.144695	1	0.716312	19.9757	14.5724	Other
NCU01198	-0.0486285	1	1	18.9456	15.8478	Other
NCU01199	-0.0191914	1	1	18.9859	15.5676	Other
NCU01200	-0.141988	1	0.740665	22.3368	19.5743	Other
NCU01201	-0.0552223	1	1	19.5543	16.3332	Other
NCU01202	-0.231293	1	0.571605	20.164	19.0109	Other
NCU01203	-0.105736	1	0.824322	21.4381	18.72	Other
NCU01204	0.0669371	1	1	19.539	15.1975	Other
NCU01205	-0.124539	1	0.734354	20.6565	18.4159	Other
NCU01206	-0.110831	1	0.809957	18.575	16.2221	Other
NCU01207	0.120255	1	0.815129	21.1922	15.7996	Other
NCU01208	-0.0605731	1	1	19.7234	16.4541	Other
NCU01209	0.0101879	1	1	20.2014	15.9904	Other
NCU01210	0.287619	1	0.544629	20.691	13.6086	Other
NCU01211	-0.00480064	1	1	20.8548	16.7012	Other
NCU01212	-0.251461	1	0.494402	20.042	18.9377	Other
NCU01213	-0.0637318	1	0.908781	20.565	17.408	Other
NCU01214	-0.0188842	1	1	21.0442	17.2126	Other
NCU01215	0.0502726	1	0.907565	21.2287	16.5814	Other
NCU01216	-0.0560996	1	0.907565	20.502	17.1423	Other
NCU01218	-0.0493976	1	1	20.2126	16.7718	Other
NCU01219	-0.0722791	1	0.912161	22.6226	18.9162	Other
NCU01220	-0.0312996	1	1	21.109	17.486	Other
NCU01221	-0.142236	1	0.72396	18.8251	17.0175	Other
NCU01223	0.823237	0.352126	0.0220395	26.9611	12.1473	Other
NCU01224	0.138755	1	0.817562	21.5531	16.0256	Other
NCU01225	0.0876164	1	0.817562	21.5802	16.3754	Other
NCU01227	0.272527	1	0.494402	23.5825	15.5734	Other
NCU01229	0.0585644	1	1	21.9725	16.8503	Other
NCU01230	0.0789823	1	0.904978	19.8335	15.3156	Other
NCU01231	0.0105638	1	1	20.8572	16.657	Other
NCU01233	-0.0527194	1	1	21.6116	17.8513	Other
NCU01234	0.161166	1	0.734354	22.978	16.6308	Other
NCU01235	-0.0946675	1	0.822153	20.8805	18.2982	Other
NCU01236	-0.00451652	1	1	21.0046	17.0098	Other
NCU01238	0.07174	1	0.907565	21.1517	16.1752	Other
NCU01240	0.0569385	1	1	19.8761	15.2235	Other
NCU01241	-0.0317645	1	1	20.3346	16.9672	Other
NCU01242	-0.210849	1	0.639988	18.7316	17.5487	Other
NCU01243	0.206474	1	0.625421	19.7434	13.9027	Other
NCU01245	0.237016	1	0.550429	21.4171	14.6596	Other
NCU01246	-0.136447	1	0.740665	21.9443	19.4564	Other
NCU01247	0.397532	1	0.328451	21.3094	12.9089	Other
NCU01248	0.371922	1	0.349203	22.7743	14.2163	Other
NCU01249	0.0160896	1	1	19.2057	15.2067	Other
NCU01250	-0.0799048	1	0.907565	20.2071	17.07	Other
NCU01252	-0.193993	1	0.639988	18.8645	17.4773	Other
NCU01253	0.0188258	1	1	18.7615	14.8683	Other
NCU01254	0.21532	1	0.614668	19.0939	13.1579	Other
NCU01255	0.0551937	1	1	17.5755	13.3641	Other
NCU01256	-0.0290826	1	1	19.9156	16.2627	Other
NCU01257	0.122484	1	0.815129	21.3325	15.8417	Other
NCU01258	-0.0271467	1	1	21.1422	17.505	Other
NCU01259	0.00149995	1	1	20.9602	16.6952	Other
NCU01260	-0.0211864	1	1	20.0482	16.2379	Other
NCU01261	-0.164088	1	0.712242	17.5743	16.0575	Other
NCU01262	-0.658315	0.766983	0.0603812	16.1174	20.5107	Other
NCU01266	0.0647519	1	0.906298	20.6516	15.8833	Other
NCU01267	0.0156311	1	1	19.1231	15.2176	Other
NCU01268	-0.26664	1	0.494402	19.8917	19.1887	Other
NCU01269	0.0507103	1	1	19.233	14.929	Other
NCU01270	0.10689	1	0.812596	20.5593	15.3565	Other
NCU01271	0.24925	1	0.561398	22.0353	15.0797	Other
NCU01272	-0.173269	1	0.644479	19.7462	17.9333	Other
NCU01273	-0.183146	1	0.635322	18.8192	17.1072	Other
NCU01274	-0.00273445	1	1	20.8602	16.673	Other
NCU01275	0.139769	1	0.707991	18.9702	13.7978	Other
NCU01276	-0.131566	1	0.720214	18.7088	16.5145	Other
NCU01277	0.0538598	1	1	18.3426	14.4148	Other
NCU01278	0.104941	1	0.903601	19.366	14.5983	Other
NCU01279	0.0451033	1	1	20.4243	15.9859	Other
NCU01281	-0.162145	1	0.648806	20.2893	18.2535	Other
NCU01282	-0.0343691	1	1	19.927	16.3888	Other
NCU01283	0.175959	1	0.712242	19.7554	13.9194	Other
NCU01284	0.493944	1	0.221567	21.7913	12.4354	Other
NCU01285	0.113693	1	0.903601	19.8402	14.7408	Other
NCU01288	0.136415	1	0.807202	19.9042	14.4405	Other
NCU01289	0.0681451	1	0.906298	20.7063	15.7801	Other
NCU01290	0.00759057	1	1	18.8262	14.9754	Other
NCU01291	-0.0148286	1	1	18.4385	14.9875	Other
NCU01292	-0.221134	1	0.571605	20.1333	18.837	Other
NCU01294	-0.068177	1	0.906298	19.7618	16.7431	Other
NCU01296	-0.0450056	1	1	20.2532	16.7831	Other
NCU01297	-0.126868	1	0.72396	19.4191	16.9373	Other
NCU01298	-0.0885677	1	0.906298	19.7825	16.8446	Other
NCU01299	0.0647309	1	0.909951	22.4497	17.1574	Other
NCU01300	0.183688	1	0.65298	23.4005	16.6051	Other
NCU01301	0.0605832	1	0.907565	21.0121	16.3767	Other
NCU01302	0.0574605	1	0.907565	21.0358	16.3332	Other
NCU01303	0.12353	1	0.812596	20.5277	15.3495	Other
NCU01304	0.276867	1	0.538599	19.9265	13.2214	Other
NCU01305	-0.109216	1	0.817562	20.4898	17.817	Other
NCU01306	-0.0390649	1	1	21.4154	17.6936	Other
NCU01307	0.0275256	1	1	20.6391	16.5763	Other
NCU01308	0.0650791	1	0.908781	21.8469	16.7725	Other
NCU01309	0.025375	1	1	20.3364	16.1114	Other
NCU01310	-0.0470641	1	1	19.8987	16.3314	Other
NCU01311	0.168299	1	0.707991	19.2681	13.5524	Other
NCU01312	0.0247904	1	1	20.6589	16.1912	Other
NCU01313	0.0234727	1	1	21.0508	16.9626	Other
NCU01314	-0.473326	1	0.155677	19.3988	22.0374	Other
NCU01315	0.278883	1	0.544629	20.9331	13.806	Other
NCU01317	0.0710163	1	0.907565	21.1379	16.2736	Other
NCU01318	0.176791	1	0.635322	21.2636	15.0177	Other
NCU01319	-0.146779	1	0.731021	20.0565	17.9225	Other
NCU01320	-0.132442	1	0.824322	21.9891	19.2112	Other
NCU01321	0.102912	1	0.903601	19.7339	14.7354	Other
NCU01322	0.260194	1	0.544629	20.7055	13.9866	Other
NCU01323	-0.12003	1	0.804324	17.4908	15.2952	Other
NCU01324	0.0378197	1	1	20.3887	16.1651	Other
NCU01325	-0.00246276	1	1	19.0503	15.6131	Other
NCU01326	-0.195436	1	0.648806	20.2933	18.5901	Other
NCU01327	0.256274	1	0.550429	20.9306	14.3316	Other
NCU01328	0.230588	1	0.625421	20.1736	13.8393	Other
NCU01329	0.346696	1	0.4096	22.3788	14.1364	Other
NCU01330	0.0324976	1	1	18.9392	15.0143	Other
NCU01331	-0.0286897	1	1	22.4956	18.2809	Other
NCU01332	-0.0895775	1	0.826413	22.2888	19.3269	Other
NCU01333	0.187853	1	0.635322	21.277	15.0144	Other
NCU01334	0.212824	1	0.556015	21.5104	15.0373	Other
NCU01335	0.0167662	1	1	19.0852	15.2233	Other
NCU01336	-0.0500349	1	0.903601	18.8526	15.6547	Other
NCU01337	0.113833	1	0.807202	19.4487	14.4999	Other
NCU01338	0.282479	1	0.544629	21.3678	13.7926	Other
NCU01339	0.154005	1	0.809957	20.4973	14.7021	Other
NCU01340	0.0424892	1	1	19.1279	15.2182	Other
NCU01341	0.126447	1	0.807202	19.5701	14.5151	Other
NCU01342	-0.0445955	1	1	20.53	17.2609	Other
NCU01343	0.120612	1	0.817562	21.8165	16.3641	Other
NCU01344	0.398476	1	0.321103	20.9038	12.6029	Other
NCU01345	0.0308572	1	1	19.8523	15.6018	Other
NCU01346	0.0161113	1	1	21.7781	17.7241	Other
NCU01347	0.0456086	1	1	21.7901	17.0349	Other
NCU01348	0.111797	1	0.815129	20.5436	15.5688	Other
NCU01349	0.0301365	1	1	18.524	14.4729	Other
NCU01350	-0.200779	1	0.639988	18.5801	17.4901	Other
NCU01351	0.286013	1	0.511857	17.9706	11.7572	Other
NCU01353	0.0791468	1	0.902162	18.879	14.4666	Other
NCU01355	0.154089	1	0.712242	19.52	13.9787	Other
NCU01356	0.418247	1	0.305695	19.6416	11.7803	Other
NCU01357	-0.217268	1	0.566591	19.9745	18.6714	Other
NCU01358	0.293782	1	0.457038	20.158	13.1678	Other
NCU01360	0.074066	1	0.912161	23.5793	17.9273	Other
NCU01361	0.149598	1	0.804324	19.0279	13.7875	Other
NCU01362	0.0166279	1	1	18.4605	14.7124	Other
NCU01364	-0.0764418	1	0.904978	18.8708	16.098	Other
NCU01365	0.0335704	1	1	19.4821	15.3088	Other
NCU01366	-0.0496074	1	0.907565	20.4441	16.9993	Other
NCU01367	0.108354	1	0.809957	20.0043	14.9768	Other
NCU01368	0.108099	1	0.815129	21.2935	15.8477	Other
NCU01369	0.299761	1	0.463836	20.6735	13.4774	Other
NCU01370	0.258336	1	0.538599	20.0998	13.4012	Other
NCU01371	-0.200464	1	0.620158	17.3473	15.9322	Other
NCU01373	0.272316	1	0.525789	19.0801	12.6729	Other
NCU01374	-0.077824	1	0.908781	20.3275	17.459	Other
NCU01375	-0.365345	1	0.246132	22.4972	23.0088	Other
NCU01376	-0.00150308	1	1	18.5002	14.8264	Other
NCU01377	0.324508	1	0.396144	20.8698	13.4668	Other
NCU01378	0.140271	1	0.804324	19.2046	14.0487	Other
NCU01379	0.0640637	1	1	19.8035	15.1908	Other
NCU01380	0.468567	1	0.228419	22.5843	13.0271	Other
NCU01381	-0.194189	1	0.712242	17.3597	15.8909	Other
NCU01382	0.0442474	1	0.909951	22.2132	17.3245	Other
NCU01383	-0.122614	1	0.812596	19.0023	16.6726	Other
NCU01385	-0.0581532	1	1	20.165	16.7289	Other
NCU01386	0.106993	1	0.904978	20.3963	15.1422	Other
NCU01387	-0.0634455	1	0.904978	19.1955	16.022	Other
NCU01388	0.00879922	1	1	20.3018	16.1505	Other
NCU01389	0.271497	1	0.538599	20.3657	13.5551	Other
NCU01390	-0.000972797	1	1	18.9225	15.5448	Other
NCU01391	-0.205648	1	0.65298	20.319	19.2279	Other
NCU01392	0.158951	1	0.734354	22.8293	16.4922	Other
NCU01393	0.188407	1	0.716312	20.2894	14.1878	Other
NCU01394	0.237893	1	0.620158	19.6179	13.4688	Other
NCU01395	0.0920779	1	0.904978	20.0436	15.138	Other
NCU01396	-0.166908	1	0.657008	21.4605	19.3744	Other
NCU01397	0.0345222	1	1	19.1213	15.1558	Other
NCU01398	-0.179389	1	0.644479	19.8231	18.186	Other
NCU01399	0.016143	1	1	21.1896	16.9184	Other
NCU01400	-0.0317374	1	1	21.7003	17.9285	Other
NCU01401	-0.0105444	1	1	20.9895	16.6733	Other
NCU01402	0.45953	1	0.260454	20.4419	12.0594	Other
NCU01403	0.363078	1	0.349203	22.6642	14.1653	Other
NCU01404	0.322475	1	0.396144	21.1748	13.7093	Other
NCU01407	0.259784	1	0.470387	20.8491	14.0124	Other
NCU01408	0.0530795	1	1	20.309	15.3919	Other
NCU01409	0.0911186	1	0.904978	19.8787	15.1331	Other
NCU01410	0.123418	1	0.807202	19.7421	14.5204	Other
NCU01411	0.0657981	1	0.908781	21.7969	16.803	Other
NCU01412	0.133864	1	0.812596	20.6322	15.1815	Other
NCU01413	0.0796389	1	0.904978	19.9596	15.2807	Other
NCU01414	0.131779	1	0.804324	18.8941	13.9107	Other
NCU01415	-0.579077	1	0.0929275	18.2559	21.7043	Other
NCU01416	-0.028976	1	1	21.116	17.297	Other
NCU01417	-0.0252925	1	1	21.9113	18.1962	Other
NCU01418	0.0289747	1	1	22.3479	17.7269	Other
NCU01419	-0.118906	1	0.807202	17.9973	15.8373	Other
NCU01420	0.126323	1	0.817562	22.2422	16.1943	Other
NCU01421	0.314102	1	0.4096	22.0224	14.392	Other
NCU01422	-0.177676	1	0.657008	21.197	19.4198	Other
NCU01423	-0.225415	1	0.639988	18.9242	17.8699	Other
NCU01424	-0.0827	1	0.906298	19.96	16.8351	Other
NCU01425	-0.264563	1	0.550429	18.1154	17.2758	Other
NCU01426	0.0685348	1	0.909951	22.0579	16.9893	Other
NCU01427	0.0250789	1	1	19.5919	15.3501	Other
NCU01428	-0.0178559	1	1	19.9708	16.4727	Other
NCU01429	0.0572158	1	1	19.4902	15.2421	Other
NCU01430	0.137434	1	0.815129	21.3146	15.6584	Other
NCU01431	0.0733997	1	1	19.7698	15.1075	Other
NCU01432	0.133752	1	0.740665	23.8517	17.5743	Other
NCU01433	0.0163832	1	1	20.014	16.1015	Other
NCU01434	0.240702	1	0.635322	21.2237	14.5252	Other
NCU01435	0.258017	1	0.556015	21.7929	14.6145	Other
NCU01436	0.280217	1	0.416006	22.0088	14.9681	Other
NCU01438	-0.10252	1	0.817562	20.2589	17.5947	Other
NCU01439	0.0806976	1	0.908781	21.6686	16.589	Other
NCU01440	0.0369801	1	1	20.6002	16.2703	Other
NCU01441	-0.201354	1	0.581133	21.2187	19.6794	Other
NCU01442	-0.116223	1	0.826413	22.2212	19.3914	Other
NCU01443	-0.0856786	1	0.907565	20.2411	17.205	Other
NCU01444	-0.248921	1	0.566591	19.6042	18.6782	Other
NCU01445	0.0213494	1	1	20.0662	15.8296	Other
NCU01446	0.130916	1	0.72396	21.0992	15.4338	Other
NCU01447	0.0728915	1	1	21.4217	16.4381	Other
NCU01448	0.151299	1	0.657008	23.3106	17.1737	Other
NCU01449	0.0091067	1	1	20.0024	16.0357	Other
NCU01450	-0.137268	1	0.731021	20.2385	17.8842	Other
NCU01451	-0.221292	1	0.561398	19.0066	17.8423	Other
NCU01452	0.168487	1	0.720214	20.2954	14.6569	Other
NCU01453	-0.104677	1	0.812596	18.812	16.551	Other
NCU01454	0.0687876	1	0.909951	22.1585	17.23	Other
NCU01455	0.27158	1	0.608934	18.5142	12.3458	Other
NCU01456	-0.108389	1	0.819901	20.8458	18.1741	Other
NCU01457	0.301013	1	0.476707	21.8415	14.2858	Other
NCU01458	0.174853	1	0.635322	21.2156	15.1089	Other
NCU01459	0.0410857	1	1	19.8723	15.5681	Other
NCU01460	-0.126149	1	0.809957	18.4001	16.0636	Other
NCU01461	0.114633	1	0.903601	19.7713	14.6859	Other
NCU01462	0.08012	1	0.907565	21.2389	16.1229	Other
NCU01463	0.0395362	1	1	21.8175	17.2885	Other
NCU01464	-0.0996217	1	0.819901	20.5844	18.0333	Other
NCU01465	0.0961952	1	0.903601	19.9159	14.9033	Other
NCU01466	0.244278	1	0.532325	19.7602	13.2022	Other
NCU01467	-0.0975568	1	0.804324	17.9418	15.2675	Other
NCU01468	0.379279	1	0.335578	21.6436	13.402	Other
NCU01469	0.124135	1	0.902162	18.8689	14.1316	Other
NCU01470	-0.0240983	1	1	18.6979	15.4628	Other
NCU01471	-0.0368326	1	1	19.49	16.2745	Other
NCU01472	-0.0114819	1	1	19.0668	15.4872	Other
NCU01473	0.077663	1	0.904978	20.2541	15.2249	Other
NCU01474	0.0568057	1	1	21.474	16.6023	Other
NCU01475	-0.0936047	1	0.903601	18.4142	15.8622	Other
NCU01476	0.0607551	1	1	20.7022	16.0587	Other
NCU01477	0.00868259	1	1	19.827	15.7611	Other
NCU01478	-0.13508	1	0.727559	19.9489	17.6015	Other
NCU01479	-0.00381084	1	1	19.283	15.5339	Other
NCU01480	0.235406	1	0.625421	19.8448	13.722	Other
NCU01481	-0.0873248	1	0.904978	19.3068	16.282	Other
NCU01483	-0.119603	1	0.822153	20.9389	18.5572	Other
NCU01484	0.0399078	1	1	19.7757	15.552	Other
NCU01485	0.0797128	1	1	19.1043	14.6508	Other
NCU01486	0.0283752	1	1	19.2872	15.2503	Other
NCU01487	-0.192806	1	0.660899	21.7102	19.9512	Other
NCU01488	-0.380171	1	0.295435	18.1486	18.8395	Other
NCU01489	0.0222542	1	1	18.0674	14.3684	Other
NCU01490	0.143826	1	0.817562	22.1911	16.0563	Other
NCU01491	-0.0658096	1	0.907565	20.3936	17.055	Other
NCU01493	0.292503	1	0.482808	22.3276	14.6099	Other
NCU01494	0.136538	1	0.809957	20.5417	14.9226	Other
NCU01495	0.440828	1	0.267831	21.1701	12.4052	Other
NCU01496	-0.00341059	1	1	21.63	17.6097	Other
NCU01498	-0.106943	1	0.815129	19.7386	17.0243	Other
NCU01499	0.0355906	1	1	19.9106	15.7894	Other
NCU01500	-0.0463774	1	1	20.5583	17.0714	Other
NCU01501	0.0780143	1	0.903601	19.7464	14.9065	Other
NCU01502	0.100931	1	0.902162	19.5551	14.3956	Other
NCU01503	0.131164	1	0.809957	20.3454	14.997	Other
NCU01504	0.22599	1	0.566591	23.0529	15.911	Other
NCU01505	0.50408	1	0.214557	20.9687	11.8724	Other
NCU01506	-0.175657	1	0.716312	17.9537	16.2798	Other
NCU01509	-0.050181	1	1	18.5982	15.484	Other
NCU01510	0.0389867	1	1	20.5312	15.9981	Other
NCU01511	0.298069	1	0.457038	20.3987	13.1254	Other
NCU01512	0.0596666	1	1	18.6739	14.4439	Other
NCU01514	0.0389302	1	1	18.8925	14.9506	Other
NCU01515	-0.0201736	1	1	21.5761	17.4317	Other
NCU01516	-0.148544	1	0.727559	19.5836	17.6348	Other
NCU01517	0.100919	1	0.907565	21.0813	16.0848	Other
NCU01519	0.0476026	1	1	19.5545	15.5796	Other
NCU01520	-0.0260833	1	1	21.7422	18.1558	Other
NCU01521	0.273413	1	0.544629	20.5748	13.7606	Other
NCU01522	0.121421	1	0.812596	20.7359	15.3739	Other
NCU01523	0.196264	1	0.644479	22.5613	15.6825	Other
NCU01524	0.0803201	1	0.908781	21.5191	16.549	Other
NCU01525	-0.0802644	1	0.903601	18.7464	15.8301	Other
NCU01526	0.0683808	1	0.909951	22.2406	17.0253	Other
NCU01527	0.157983	1	0.720214	20.7697	14.7679	Other
NCU01528	-0.62974	0.726583	0.0557913	19.5733	24.8537	Other
NCU01529	0.0827376	1	0.829121	23.7738	18.6518	Other
NCU01530	0.322821	1	0.416006	23.1135	14.6476	Other
NCU01531	0.0948929	1	0.902162	19.0702	14.3182	Other
NCU01532	0.150201	1	0.809957	20.4247	14.7241	Other
NCU01534	0.0698056	1	0.906298	20.4536	15.844	Other
NCU01535	-0.111352	1	0.819901	20.6217	17.8956	Other
NCU01536	-0.534812	1	0.123872	19.0792	22.2568	Other
NCU01539	0.056579	1	1	20.133	15.52	Other
NCU01540	-0.106728	1	0.904978	18.6907	16.3656	Other
NCU01541	-0.218317	1	0.585666	21.6994	20.3627	Other
NCU01542	0.19641	1	0.620158	19.4871	13.5734	Other
NCU01543	-0.0777483	1	0.907565	19.987	17.1128	Other
NCU01545	-0.180328	1	0.585666	22.2161	20.1246	Other
NCU01546	-0.317477	1	0.36821	19.9128	19.9473	Other
NCU01547	0.097502	1	0.906298	20.9179	15.6654	Other
NCU01548	-0.016463	1	1	21.044	17.566	Other
NCU01549	-0.160508	1	0.731021	20.3212	18.1604	Other
NCU01550	0.333749	1	0.402983	21.987	13.7882	Other
NCU01551	0.0141967	1	1	18.678	14.8924	Other
NCU01552	-0.303043	1	0.422212	19.5187	19.0668	Other
NCU01553	-0.0898493	1	0.819901	21.0134	17.8873	Other
NCU01554	0.034633	1	1	20.2265	15.8152	Other
NCU01555	-0.142562	1	0.743657	22.239	19.8911	Other
NCU01559	-0.030601	1	1	21.7484	17.9459	Other
NCU01560	-0.45536	1	0.235117	16.9307	18.7538	Other
NCU01561	0.13192	1	0.807202	20.0241	14.5073	Other
NCU01562	0.352219	1	0.342492	22.1769	14.0676	Other
NCU01563	0.193899	1	0.639988	21.8013	15.376	Other
NCU01564	-0.0694274	1	0.903601	19.002	15.9104	Other
NCU01565	-0.0080081	1	1	20.3959	16.4662	Other
NCU01566	-0.0876443	1	0.908781	20.9252	17.8135	Other
NCU01567	0.323089	1	0.402983	21.7791	14.0811	Other
NCU01568	0.161957	1	0.72396	21.5848	15.4048	Other
NCU01569	0.0693665	1	0.904978	20.047	15.4259	Other
NCU01570	0.115189	1	0.809957	20.2406	15.0474	Other
NCU01571	0.139322	1	0.809957	20.154	14.7324	Other
NCU01572	0.252729	1	0.538599	19.8568	13.4355	Other
NCU01573	0.324257	1	0.416006	23.4115	14.8871	Other
NCU01575	0.00103232	1	1	21.684	17.4006	Other
NCU01577	0.187668	1	0.639988	21.3079	15.2608	Other
NCU01579	-0.0262617	1	1	23.8808	19.631	Other
NCU01580	0.208382	1	0.635322	21.0533	14.8072	Other
NCU01581	-0.0500415	1	0.908781	20.9034	17.3981	Other
NCU01584	0.15647	1	0.807202	19.6079	14.2111	Other
NCU01585	-0.0182609	1	1	16.9499	14.0522	Other
NCU01587	0.157918	1	0.720214	20.569	14.7899	Other
NCU01589	0.39641	1	0.342492	22.7456	13.7527	Other
NCU01591	0.328849	1	0.496631	16.947	10.7638	Other
NCU01592	-0.0623085	1	0.906298	20.0931	16.7441	Other
NCU01593	0.196765	1	0.630471	20.2384	14.2628	Other
NCU01595	0.329792	1	0.4096	21.9419	14.0831	Other
NCU01596	0.250063	1	0.550429	20.7886	14.3588	Other
NCU01597	0.214838	1	0.620158	19.6612	13.6663	Other
NCU01598	-0.167462	1	0.716312	18.0811	16.3954	Other
NCU01599	0.104787	1	0.906298	21.0345	15.6096	Other
NCU01601	-0.0744788	1	0.906298	19.7879	16.829	Other
NCU01605	0.127221	1	0.815129	21.4942	15.8478	Other
NCU01606	-0.0196983	1	1	20.589	16.8061	Other
NCU01607	0.134862	1	0.804324	19.1135	14.0583	Other
NCU01608	0.116353	1	0.815129	21.2097	15.6452	Other
NCU01610	0.56038	1	0.175303	21.6619	11.7359	Other
NCU01611	0.257071	1	0.550429	21.6887	14.408	Other
NCU01612	0.333114	1	0.435009	18.3488	11.6806	Other
NCU01613	0.315826	1	0.463836	20.7517	13.3613	Other
NCU01614	-0.0310304	1	1	21.5694	17.4848	Other
NCU01615	0.0174034	1	1	18.6038	14.9626	Other
NCU01620	-0.285932	1	0.457038	16.4731	16.2255	Other
NCU01623	0.171903	1	0.707991	19.1011	13.6592	Other
NCU01625	0.199112	1	0.635322	21.0635	14.6774	Other
NCU01629	-0.0240832	1	1	20.456	16.7849	Other
NCU01631	-0.107412	1	0.809957	18.3298	16.0528	Other
NCU01632	0.225639	1	0.550429	20.9475	14.478	Other
NCU01633	-0.294118	1	0.416006	18.8176	18.532	Other
NCU01634	0.092078	1	0.909951	22.212	16.7839	Other
NCU01635	0.095978	1	0.817562	21.4459	16.4022	Other
NCU01636	0.0638742	1	0.911076	22.8365	17.5096	Other
NCU01637	0.161227	1	0.716312	20.4434	14.5108	Other
NCU01638	0.0923494	1	0.809957	19.9371	14.9899	Other
NCU01640	-0.157868	1	0.664662	22.2234	20.3121	Other
NCU01642	0.082932	1	0.906298	20.7245	15.7669	Other
NCU01643	0.213784	1	0.635322	21.0429	14.6613	Other
NCU01644	-0.0270285	1	1	18.9173	15.4471	Other
NCU01645	-0.0566197	1	1	20.1243	16.7886	Other
NCU01646	0.0685604	1	1	20.1108	15.6227	Other
NCU01647	0.0092491	1	1	22.9205	18.1601	Other
NCU01648	0.1016	1	0.817562	21.6952	16.2109	Other
NCU01649	0.0211667	1	1	21.2518	16.8307	Other
NCU01650	0.282141	1	0.422212	23.8673	15.527	Other
NCU01651	0.169626	1	0.712242	19.8878	14.1274	Other
NCU01652	0.00174496	1	1	21.5077	17.5084	Other
NCU01653	0.478222	1	0.171081	24.5438	14.4446	Other
NCU01654	-0.0463289	1	0.906298	19.8302	16.4865	Other
NCU01655	0.0883266	1	0.902162	19.0083	14.6329	Other
NCU01656	0.0628751	1	0.906298	20.4934	15.8576	Other
NCU01657	0.403475	1	0.288805	22.5097	13.9343	Other
NCU01658	0.247434	1	0.550429	21.1155	14.2293	Other
NCU01659	0.15026	1	0.712242	19.322	14.0676	Other
NCU01660	-0.014552	1	1	22.0583	18.324	Other
NCU01664	0.118127	1	0.817562	21.7857	16.2005	Other
NCU01665	-0.117515	1	0.817562	19.93	17.5575	Other
NCU01666	0.175962	1	0.727559	21.6538	15.6382	Other
NCU01667	0.102319	1	0.908781	22.1324	16.5542	Other
NCU01668	-0.14012	1	0.731021	20.2698	18.0897	Other
NCU01669	0.114966	1	0.812596	20.9088	15.3474	Other
NCU01670	-0.0458099	1	1	19.9704	16.7124	Other
NCU01672	0.167086	1	0.720214	20.573	14.7557	Other
NCU01673	0.140915	1	0.712242	19.1919	14.0884	Other
NCU01674	-0.061726	1	0.906298	19.7324	16.5533	Other
NCU01675	0.166028	1	0.712242	19.4903	13.9216	Other
NCU01678	0.0748072	1	0.907565	20.8362	16.0543	Other
NCU01679	-0.0365926	1	1	19.4732	16.1899	Other
NCU01680	0.091799	1	0.907565	21.3187	16.1031	Other
NCU01681	-0.242162	1	0.538599	17.1379	16.3589	Other
NCU01684	-0.227173	1	0.520313	22.1909	21.156	Other
NCU01686	0.121354	1	0.822153	23.3966	17.0807	Other
NCU01688	0.0360962	1	1	22.4224	17.1281	Other
NCU01689	-0.0842117	1	0.904978	19.158	16.4656	Other
NCU01692	0.248387	1	0.566591	23.058	15.6752	Other
NCU01695	-0.127692	1	0.812596	18.7001	16.6155	Other
NCU01696	0.209638	1	0.625421	19.8785	13.9225	Other
NCU01697	-0.212766	1	0.561398	19.3982	17.8822	Other
NCU01698	-0.0652531	1	0.906298	20.0054	16.6936	Other
NCU01699	-0.0772014	1	0.904978	19.2846	16.1068	Other
NCU01700	-0.100692	1	0.908781	20.4474	17.8606	Other
NCU01701	0.0126053	1	1	18.389	14.7541	Other
NCU01702	0.18546	1	0.625421	19.8373	14.0312	Other
NCU01703	0.413646	1	0.27501	21.9012	13.2878	Other
NCU01704	0.091374	1	0.906298	20.8631	15.6245	Other
NCU01705	-0.0338582	1	1	18.4597	15.2892	Other
NCU01706	-0.0742405	1	0.900657	17.7018	14.809	Other
NCU01713	0.0142785	1	1	18.6744	15.044	Other
NCU01715	-0.121553	1	0.812596	19.3212	16.8094	Other
NCU01717	-0.185616	1	0.727559	19.6021	17.844	Other
NCU01720	-0.0863124	1	0.817562	20.4209	17.4519	Other
NCU01722	0.103256	1	0.904978	20.5905	15.299	Other
NCU01724	0.160589	1	0.698894	17.7365	12.7647	Other
NCU01725	0.114793	1	0.812596	20.3749	15.2868	Other
NCU01728	-0.0171885	1	1	19.7238	16.0329	Other
NCU01729	0.122031	1	0.812596	20.9493	15.4967	Other
NCU01731	-0.0285994	1	1	20.0328	16.3642	Other
NCU01734	-0.185862	1	0.644479	19.915	18.2463	Other
NCU01735	-0.381671	1	0.266435	19.9125	20.8155	Other
NCU01737	0.0375038	1	1	20.057	15.6808	Other
NCU01738	0.124128	1	0.815129	21.4472	15.7816	Other
NCU01739	0.443158	1	0.235117	22.8002	13.5955	Other
NCU01740	-0.0661494	1	1	21.6238	18.6323	Other
NCU01741	0.103208	1	0.817562	21.5463	16.2597	Other
NCU01742	0.21716	1	0.703547	18.6079	12.8696	Other
NCU01744	0.0194616	1	1	18.9956	15.0949	Other
NCU01745	0.00534133	1	1	18.4692	14.71	Other
NCU01746	0.14553	1	0.727559	21.6315	15.9413	Other
NCU01747	0.107345	1	0.809957	20.0907	15.0246	Other
NCU01748	-0.068726	1	0.903601	18.6416	15.792	Other
NCU01750	0.0986722	1	0.906298	21.3945	15.6707	Other
NCU01751	-0.0797983	1	0.906298	19.6181	16.7458	Other
NCU01752	0.172752	1	0.703547	18.0255	13.1192	Other
NCU01753	-0.32727	1	0.380023	20.943	20.9889	Other
NCU01754	-0.421138	1	0.21854	19.3052	20.8517	Other
NCU01756	-0.107836	1	0.824322	21.773	19.1141	Other
NCU01757	0.0590594	1	0.907565	20.9837	16.255	Other
NCU01758	0.125636	1	0.815129	21.1691	15.537	Other
NCU01759	0.158104	1	0.720214	20.9352	14.9788	Other
NCU01760	0.0421188	1	1	20.157	15.8657	Other
NCU01761	0.189687	1	0.625421	19.4753	14.0651	Other
NCU01762	0.321836	1	0.470387	21.272	13.6604	Other
NCU01763	0.198489	1	0.72396	22.0787	15.0695	Other
NCU01764	-0.0178796	1	1	19.3385	15.9995	Other
NCU01765	0.0782069	1	0.904978	20.0334	15.2877	Other
NCU01766	-0.334646	1	0.4096	17.7104	18.0814	Other
NCU01767	0.0382812	1	1	19.5935	15.4389	Other
NCU01768	-0.098223	1	0.904978	19.054	16.3913	Other
NCU01769	0.405882	1	0.342492	22.6409	13.6611	Other
NCU01771	0.260107	1	0.550429	20.8439	14.103	Other
NCU01772	0.0162841	1	1	19.5957	15.3996	Other
NCU01776	0.0125887	1	1	21.691	17.4051	Other
NCU01777	0.061485	1	1	19.6294	15.2169	Other
NCU01779	0.273881	1	0.476707	21.7671	14.3911	Other
NCU01780	-0.00138659	1	1	19.4303	15.8616	Other
NCU01781	-0.145223	1	0.72396	19.2388	17.0925	Other
NCU01782	0.0854526	1	0.904978	20.1926	15.355	Other
NCU01783	0.163277	1	0.720214	20.6878	14.725	Other
NCU01784	0.155022	1	0.716312	20.1989	14.5633	Other
NCU01785	0.115968	1	0.817562	21.9747	16.2529	Other
NCU01786	-0.0255026	1	1	19.4144	16.0845	Other
NCU01788	-0.058988	1	0.906298	19.6853	16.6553	Other
NCU01789	0.136856	1	0.809957	20.0365	14.6138	Other
NCU01790	-0.0434229	1	1	23.7597	19.8487	Other
NCU01791	-0.0357777	1	1	19.284	15.9545	Other
NCU01792	0.0241932	1	1	21.9126	17.1175	Other
NCU01793	0.270355	1	0.476707	21.3579	14.4314	Other
NCU01794	-0.0044701	1	1	22.4967	18.0114	Other
NCU01795	-0.215671	1	0.639988	19.1312	17.8021	Other
NCU01796	-0.0542065	1	0.907565	20.3616	16.9129	Other
NCU01797	0.066642	1	0.906298	20.6759	15.973	Other
NCU01798	0.352236	1	0.342492	22.0242	13.9621	Other
NCU01799	-0.0372782	1	1	19.7066	16.6052	Other
NCU01800	-0.0479948	1	1	18.495	15.4856	Other
NCU01801	0.587931	1	0.114269	22.514	12.1892	Other
NCU01802	-0.0128729	1	1	21.5164	17.693	Other
NCU01803	-0.0516689	1	0.912161	22.482	18.7263	Other
NCU01804	-0.0503168	1	0.906298	19.7181	16.5546	Other
NCU01805	0.294873	1	0.525789	18.9529	12.5621	Other
NCU01806	0.237333	1	0.532325	19.6628	13.197	Other
NCU01807	0.20262	1	0.630471	20.5701	14.4478	Other
NCU01808	-0.0886655	1	0.904978	19.2657	16.4753	Other
NCU01809	0.326122	1	0.389071	20.5341	13.2029	Other
NCU01810	0.279688	1	0.544629	20.8087	13.8489	Other
NCU01811	-0.0105742	1	1	21.2543	17.5567	Other
NCU01812	0.362164	1	0.342492	22.492	13.8545	Other
NCU01813	-0.105048	1	0.815129	20.005	17.2076	Other
NCU01814	-0.0032292	1	1	18.961	15.4658	Other
NCU01815	0.14014	1	0.72396	21.0585	15.4331	Other
NCU01816	0.0538383	1	0.908781	21.3456	16.706	Other
NCU01817	-0.0593772	1	1	18.9014	15.9679	Other
NCU01818	0.187679	1	0.625421	20.5103	14.0782	Other
NCU01819	-0.000952409	1	1	19.7988	16.0751	Other
NCU01820	0.0725314	1	1	20.541	15.684	Other
NCU01821	0.239701	1	0.639988	22.13	14.9793	Other
NCU01822	-0.140405	1	0.716312	18.1156	16.0967	Other
NCU01823	0.182608	1	0.716312	19.8495	14.2046	Other
NCU01824	0.326574	1	0.457038	19.9433	12.8546	Other
NCU01826	0.154134	1	0.720214	20.8439	15.0413	Other
NCU01827	-0.0524192	1	1	21.1202	17.5881	Other
NCU01828	0.0802672	1	0.907565	21.5862	16.3866	Other
NCU01829	0.113518	1	0.815129	21.3723	15.7433	Other
NCU01830	0.0052736	1	1	17.9543	14.2203	Other
NCU01831	0.258486	1	0.544629	21.0605	14.0625	Other
NCU01833	0.0487102	1	0.908781	21.7856	16.8812	Other
NCU01834	-0.00329442	1	1	22.0406	18.0522	Other
NCU01835	-0.310562	1	0.364398	24.4443	24.7976	Other
NCU01837	0.0578128	1	0.906298	20.3042	15.9408	Other
NCU01838	0.0881098	1	0.904978	20.1018	15.2633	Other
NCU01839	-0.016265	1	1	19.7533	16.0208	Other
NCU01840	0.118522	1	0.812596	20.7493	15.4359	Other
NCU01841	0.189714	1	0.590055	25.2964	18.1764	Other
NCU01842	-0.00131558	1	1	20.8261	16.7713	Other
NCU01843	0.283955	1	0.457038	19.9588	13.107	Other
NCU01844	0.125309	1	0.807202	19.9075	14.4889	Other
NCU01845	-0.18311	1	0.644479	19.8628	18.1841	Other
NCU01846	-0.0280288	1	1	20.2721	16.7322	Other
NCU01848	0.106853	1	0.840323	26.2853	19.6465	Other
NCU01849	0.490104	1	0.171081	24.4656	14.164	Other
NCU01850	0.281099	1	0.470387	21.0238	13.9733	Other
NCU01851	0.0909939	1	0.904978	20.4648	15.1636	Other
NCU01852	0.267591	1	0.494402	22.6072	15.4179	Other
NCU01853	0.171717	1	0.639988	21.0247	15.4459	Other
NCU01854	-0.00837322	1	1	20.5129	16.6878	Other
NCU01855	0.0489142	1	1	20.5881	15.8188	Other
NCU01856	-0.252834	1	0.482808	18.8293	18.0311	Other
NCU01857	0.0199896	1	1	19.0082	15.018	Other
NCU01858	0.0754634	1	0.906298	20.4239	15.6114	Other
NCU01859	-0.126762	1	0.815129	19.1792	17.0967	Other
NCU01860	0.0818297	1	0.89908	17.3781	13.4407	Other
NCU01861	0.00986985	1	1	23.09	18.7122	Other
NCU01862	-0.152837	1	0.720214	18.3707	16.5664	Other
NCU01863	-0.0328906	1	1	19.883	16.4378	Other
NCU01865	0.318614	1	0.44998	19.7748	12.7478	Other
NCU01866	-0.0961392	1	0.904978	19.4176	16.5041	Other
NCU01867	0.601512	1	0.140909	18.625	9.91957	Other
NCU01868	0.103319	1	0.815129	20.7922	15.8372	Other
NCU01869	-0.105021	1	0.908781	20.2277	17.7566	Other
NCU01870	-0.215827	1	0.65298	20.5887	19.35	Other
NCU01871	-0.398615	1	0.272293	19.841	21.3027	Other
NCU01872	0.243836	1	0.510431	24.3948	17.0501	Other
NCU01873	-0.0797378	1	0.911076	21.8696	18.7848	Other
NCU01874	0.438721	1	0.235117	22.5446	13.3744	Other
NCU01875	0.360482	1	0.31433	25.2276	15.783	Other
NCU01876	-0.11569	1	0.809957	18.5648	16.0316	Other
NCU01877	0.158678	1	0.716312	20.3601	14.3977	Other
NCU01878	0.0368435	1	1	18.9309	14.9242	Other
NCU01879	0.208979	1	0.625421	19.9608	13.8682	Other
NCU01880	0.0970888	1	0.904978	20.4839	15.3588	Other
NCU01881	0.0239141	1	1	21.28	16.8558	Other
NCU01882	-0.0071709	1	1	20.3848	16.5135	Other
NCU01883	-0.165064	1	0.720214	18.7245	16.595	Other
NCU01884	0.181999	1	0.635322	21.0613	15.0484	Other
NCU01886	-0.0904974	1	0.908781	20.4142	17.6173	Other
NCU01888	-0.00492918	1	1	20.7398	16.6456	Other
NCU01889	0.00115957	1	1	19.3677	15.4597	Other
NCU01891	-0.201419	1	0.561398	19.1604	17.7412	Other
NCU01893	-0.29419	1	0.476707	17.9426	17.8049	Other
NCU01894	0.155396	1	0.716312	20.2483	14.5913	Other
NCU01895	0.0422461	1	1	20.1955	15.6876	Other
NCU01896	-0.157795	1	0.720214	18.8459	16.8978	Other
NCU01897	-0.129757	1	0.72396	19.7669	17.1096	Other
NCU01898	-0.252648	1	0.465732	23.9322	22.6919	Other
NCU01899	-0.197848	1	0.644479	19.7689	18.1043	Other
NCU01900	0.256645	1	0.482808	22.0059	14.9802	Other
NCU01901	0.181676	1	0.712242	19.2076	13.6555	Other
NCU01902	-0.0991097	1	0.907565	19.8908	17.3198	Other
NCU01903	-0.0976581	1	0.807202	18.0022	15.5668	Other
NCU01904	-0.0386601	1	1	20.3265	16.5426	Other
NCU01905	0.213121	1	0.635322	21.4967	14.7031	Other
NCU01906	0.0838473	1	0.904978	19.9205	15.1005	Other
NCU01907	0.0773808	1	0.909951	22.4662	16.9935	Other
NCU01908	0.0672488	1	0.903601	19.3582	15.0151	Other
NCU01910	-0.0130843	1	1	18.5912	15.1321	Other
NCU01911	0.000234737	1	1	19.7251	15.9423	Other
NCU01912	0.0239559	1	1	18.6255	14.771	Other
NCU01913	-0.011321	1	1	19.1054	15.4997	Other
NCU01914	-0.0914771	1	0.904978	19.1824	16.1581	Other
NCU01916	0.255225	1	0.625421	20.2794	13.7296	Other
NCU01917	-0.106966	1	0.812596	19.4969	16.7227	Other
NCU01918	-0.147366	1	0.72396	19.2975	17.0543	Other
NCU01919	-0.181361	1	0.731021	19.9881	18.251	Other
NCU01920	-0.153769	1	0.72396	19.0251	17.1563	Other
NCU01922	-0.149336	1	0.750996	20.9287	18.4777	Other
NCU01923	0.187387	1	0.639988	21.4717	15.3481	Other
NCU01924	0.0909309	1	0.902162	18.9796	14.208	Other
NCU01926	-0.0162201	1	1	25.7188	21.2744	Other
NCU01927	0.0141501	1	1	19.8523	15.7742	Other
NCU01928	-0.134023	1	0.72396	19.2062	17.0976	Other
NCU01929	0.0212151	1	1	19.9934	15.7815	Other
NCU01930	0.0316534	1	1	19.8424	15.7417	Other
NCU01931	0.0963	1	0.815129	21.2155	15.7973	Other
NCU01932	-0.0524679	1	0.906298	19.8174	16.5821	Other
NCU01935	0.162524	1	0.716312	20.2097	14.5498	Other
NCU01936	-0.115684	1	0.904978	18.6333	16.4418	Other
NCU01938	-0.158623	1	0.804324	17.1832	15.4882	Other
NCU01939	0.130817	1	0.812596	20.5373	15.1232	Other
NCU01940	-0.0885971	1	0.904978	19.0484	16.1874	Other
NCU01942	-0.355593	1	0.320317	20.1468	20.917	Other
NCU01943	0.0237439	1	1	19.8283	15.6925	Other
NCU01944	0.037269	1	1	20.6656	16.221	Other
NCU01945	-0.0763091	1	0.906298	19.7097	16.7781	Other
NCU01946	-0.900456	1	0.136053	5.86441	8.68831	Other
NCU01947	0.0284202	1	1	20.1133	15.6842	Other
NCU01948	-0.338324	1	0.308191	19.4456	19.8198	Other
NCU01949	0.204022	1	0.703547	18.4083	12.8142	Other
NCU01950	0.158875	1	0.720214	20.1732	14.6942	Other
NCU01951	0.153296	1	0.716312	19.7258	14.3632	Other
NCU01953	0.0632097	1	0.903601	19.4831	14.983	Other
NCU01954	0.0131323	1	1	18.6264	15.1363	Other
NCU01955	-0.102116	1	0.812596	18.9261	16.6361	Other
NCU01956	0.104357	1	0.903601	19.6771	14.8386	Other
NCU01957	-0.14606	1	0.712242	17.6414	15.7733	Other
NCU01961	0.0694498	1	0.903601	19.3263	14.9778	Other
NCU01962	-0.313627	1	0.389071	16.8104	16.7057	Other
NCU01963	-0.00441855	1	1	17.409	14.1381	Other
NCU01964	-0.117551	1	0.809957	18.4638	16.1474	Other
NCU01965	0.101614	1	0.904978	20.0216	15.1168	Other
NCU01966	-0.0557932	1	1	20.7479	17.3877	Other
NCU01967	0.347784	1	0.389071	20.619	12.9156	Other
NCU01968	-0.00899807	1	1	21.4178	17.1944	Other
NCU01969	-0.11748	1	0.89908	16.8412	14.6693	Other
NCU01970	-0.280774	1	0.518973	15.6182	14.9104	Other
NCU01971	0.0858869	1	0.902162	19.1797	14.4514	Other
NCU01972	-0.166831	1	0.72396	18.5683	17.2154	Other
NCU01973	-0.00182638	1	1	20.0101	16.0912	Other
NCU01974	0.0651063	1	1	21.9647	16.9166	Other
NCU01975	0.327888	1	0.402983	21.4747	13.7979	Other
NCU01976	-0.0291662	1	1	19.1124	15.6494	Other
NCU01977	0.0212705	1	1	19.7802	15.6515	Other
NCU01978	0.0148421	1	1	20.4798	16.1094	Other
NCU01979	0.29895	1	0.538599	20.6396	13.2912	Other
NCU01980	0.129457	1	0.72396	21.1574	15.458	Other
NCU01981	-0.131247	1	0.817562	20.0279	17.8166	Other
NCU01982	0.184826	1	0.707991	19.3192	13.6674	Other
NCU01983	-0.0311101	1	1	18.49	15.1046	Other
NCU01984	-0.0959861	1	0.900657	17.1893	14.8951	Other
NCU01985	0.120405	1	0.902162	19.1924	14.2239	Other
NCU01987	0.0661342	1	1	18.9099	14.6412	Other
NCU01988	-0.00810996	1	1	19.0435	15.5969	Other
NCU01989	-0.0532066	1	1	20.5614	17.2598	Other
NCU01990	-0.0235633	1	1	19.3551	16.1494	Other
NCU01991	0.110479	1	0.815129	21.0967	15.7308	Other
NCU01992	-0.0220247	1	1	18.3489	15.1296	Other
NCU01993	0.100498	1	0.904978	19.8497	15.0891	Other
NCU01994	0.102347	1	0.902162	19.113	14.4347	Other
NCU01995	0.0218944	1	1	19.4112	15.627	Other
NCU01996	0.141129	1	0.720214	20.61	15.0284	Other
NCU01997	0.108127	1	0.89908	18.3293	13.4714	Other
NCU01998	0.0208443	1	1	20.7455	16.4244	Other
NCU01999	-0.049936	1	0.904978	19.3092	16.059	Other
NCU02000	0.0182331	1	1	17.1655	13.6304	Other
NCU02001	0.133799	1	0.727559	21.7799	15.805	Other
NCU02002	0.13275	1	0.809957	20.3688	14.9155	Other
NCU02003	-0.145621	1	0.675239	24.3979	21.7468	Other
NCU02004	0.156946	1	0.79816	18.3533	13.0041	Other
NCU02005	-0.203015	1	0.639988	18.8601	17.6022	Other
NCU02006	-0.00195762	1	1	20.8707	16.6814	Other
NCU02007	-0.367602	1	0.289122	21.7988	22.807	Other
NCU02008	-0.0297996	1	1	18.4243	14.791	Other
NCU02009	-0.00172478	1	1	20.2501	16.4242	Other
NCU02010	0.0864075	1	0.907565	21.7765	16.3479	Other
NCU02011	-0.0142344	1	1	18.8452	15.2129	Other
NCU02012	-0.0675685	1	1	19.6458	16.8167	Other
NCU02013	0.235754	1	0.561398	22.6388	15.2158	Other
NCU02014	-0.575806	1	0.220343	12.281	14.7928	Other
NCU02015	0.187646	1	0.639988	21.2901	15.2128	Other
NCU02016	0.239777	1	0.550429	21.2648	14.6338	Other
NCU02017	-0.247793	1	0.561398	18.8079	18.1466	Other
NCU02018	-0.00365493	1	1	19.7547	15.6522	Other
NCU02019	0.419814	1	0.313521	20.1554	11.9898	Other
NCU02020	0.0807512	1	0.904978	19.8824	15.28	Other
NCU02021	0.549427	1	0.228821	18.6456	10.0093	Other
NCU02022	0.0825056	1	0.904978	20.339	15.2424	Other
NCU02023	0.164563	1	0.707991	18.6127	13.5879	Other
NCU02024	-0.129964	1	0.712242	17.9297	15.5702	Other
NCU02025	0.353338	1	0.435009	19.0309	11.772	Other
NCU02026	-0.0698336	1	0.900657	17.7231	14.8578	Other
NCU02027	-0.0257034	1	1	20.2278	16.9245	Other
NCU02028	0.155368	1	0.716312	19.9677	14.6097	Other
NCU02029	-0.102673	1	0.900657	17.3891	15.023	Other
NCU02030	-0.103348	1	0.801314	17.1731	14.7593	Other
NCU02031	0.108133	1	0.906298	20.5923	15.5361	Other
NCU02032	-0.0693305	1	0.904978	19.0401	16.0375	Other
NCU02033	-0.0719642	1	1	18.1044	15.4433	Other
NCU02034	-0.0967654	1	0.900657	17.3859	14.9494	Other
NCU02035	0.0357718	1	1	18.3766	14.4855	Other
NCU02036	0.0751334	1	0.902162	19.2789	14.6277	Other
NCU02037	0.509084	1	0.221567	21.8429	12.4678	Other
NCU02038	-0.239896	1	0.68889	14.3383	13.7693	Other
NCU02039	0.27029	1	0.457038	19.7766	13.2646	Other
NCU02040	-0.00154914	1	1	18.3083	14.6588	Other
NCU02041	0.025089	1	1	19.9236	15.8348	Other
NCU02042	-0.028924	1	1	18.81	15.3974	Other
NCU02043	0.211142	1	0.639988	21.9585	15.1765	Other
NCU02044	-0.251317	1	0.550429	18.0906	17.326	Other
NCU02046	-0.0337984	1	1	18.3287	14.9834	Other
NCU02048	0.116824	1	0.804324	19.0521	14.1138	Other
NCU02049	-0.0515591	1	1	17.7349	14.7711	Other
NCU02051	0.0909248	1	0.902162	18.9465	14.3728	Other
NCU02052	0.0146534	1	1	18.5581	14.7586	Other
NCU02053	0.020974	1	1	17.3957	13.9209	Other
NCU02054	0.195479	1	0.707991	19.0536	13.4801	Other
NCU02055	-0.142715	1	0.79816	16.2537	14.422	Other
NCU02056	-0.055571	1	0.903601	18.7973	15.714	Other
NCU02057	-0.0767046	1	0.904978	19.0785	16.2875	Other
NCU02058	0.165387	1	0.779775	15.6167	11.0121	Other
NCU02059	-0.0786817	1	0.904978	19.2883	16.2605	Other
NCU02060	0.0440387	1	1	20.6526	16.0072	Other
NCU02061	-0.910625	0.330178	0.0204193	11.9404	18.3947	Other
NCU02062	-0.0715498	1	0.897426	16.577	13.8848	Other
NCU02063	0.0993165	1	0.903601	19.8591	14.9296	Other
[truncated: 7,731 more rows]

## Sheet: iswi
genes	logFC	FDR	Pvalue	iswi	wt	category
NCU01922	1.40707	3.52206e-05	1.75198e-06	49.8027	18.4777	Up
NCU01926	2.79242	1.07074e-24	4.51185e-27	150.232	21.2744	Up
NCU03577	1.66037	3.34418e-10	9.58916e-12	74.7895	23.1808	Up
NCU03578	1.25578	0.000259129	1.46476e-05	43.707	17.9564	Up
NCU03580	1.80587	4.75981e-15	7.63135e-17	114.44	32.1189	Up
NCU03581	1.49515	7.54678e-14	1.35733e-15	147.698	51.67	Up
NCU03582	1.34543	2.65777e-15	4.15191e-17	228.223	88.7497	Up
NCU04992	1.0221	1.95927e-05	9.34327e-07	370.784	179.715	Up
NCU04994	1.55447	1.29808e-16	1.78769e-18	169.516	56.9281	Up
NCU04997	1.45084	8.87992e-14	1.61536e-15	271.093	97.4419	Up
NCU04998	1.85469	2.00295e-22	1.17336e-24	248.842	67.7837	Up
NCU05000	2.17952	8.93316e-25	3.67242e-27	143.7	31.186	Up
NCU05001	1.69152	1.60324e-09	4.94318e-11	68.181	20.7398	Up
NCU05004	1.56163	2.05074e-15	3.16147e-17	152.98	50.8938	Up
NCU05005	1.91521	2.30202e-20	2.01101e-22	137.655	35.8239	Up
NCU05006	1.31912	1.96584e-05	9.41504e-07	53.6864	21.131	Up
NCU05011	1.87674	5.61803e-10	1.6398e-11	62.2868	16.6664	Up
NCU05012	1.92946	1.93637e-16	2.70654e-18	111.379	28.8363	Up
NCU05013	1.17061	0.00013969	7.5803e-06	54.5061	23.7607	Up
NCU05015	1.67488	2.28088e-14	3.91476e-16	151.221	46.6155	Up
NCU05016	1.79153	4.34698e-11	1.1303e-12	78.7179	22.2865	Up
NCU05019	1.9353	8.97045e-13	1.91763e-14	86.0058	22.1561	Up
NCU05020	1.37344	3.06756e-05	1.51644e-06	47.5497	18.0251	Up
NCU05022	1.08242	0.0045463	0.000324268	39.4788	18.225	Up
NCU05025	1.40273	1.28235e-07	4.75773e-09	86.8882	32.5122	Up
NCU05031	1.2736	0.00084144	5.28386e-05	37.046	15.1099	Up
NCU05161	1.54774	4.00001e-10	1.15519e-11	91.3425	30.8183	Up
NCU05162	2.05428	1.05264e-17	1.27659e-19	104.935	24.8383	Up
NCU05163	1.43945	4.02928e-11	1.04355e-12	116.996	42.5611	Up
NCU05164	1.36159	1.24745e-13	2.38464e-15	162.13	62.297	Up
NCU05165	1.20254	1.2264e-11	2.94941e-13	160.882	68.872	Up
NCU05180	1.11356	2.82208e-06	1.22977e-07	90.9271	41.4895	Up
NCU05460	1.51716	1.87855e-09	5.81135e-11	87.2258	30.0833	Up
NCU05463	1.27395	1.02748e-08	3.32638e-10	287.667	117.338	Up
NCU05467	1.13567	7.19283e-05	3.74057e-06	157.144	69.9773	Up
NCU05469	1.62605	4.61973e-10	1.33891e-11	193.36	61.6471	Up
NCU05470	1.66664	8.72131e-12	2.07949e-13	148.08	45.9535	Up
NCU05472	1.85684	2.1029e-13	4.17122e-15	93.5351	25.3802	Up
NCU05481	1.1465	0.00277918	0.000189659	40.0609	17.9093	Up
NCU05668	1.36535	3.07578e-07	1.18858e-08	75.3449	28.9205	Up
NCU05678	1.1269	4.70351e-08	1.6484e-09	183.678	83.2627	Up
NCU05698	1.65867	7.71428e-08	2.75113e-09	58.5139	18.2389	Up
NCU05705	1.09115	0.000756164	4.70951e-05	49.7449	22.9876	Up
NCU05842	1.09024	0.00487282	0.000349561	41.2476	19.0172	Up
NCU05844	1.27258	0.000784188	4.89211e-05	39.5044	15.9676	Up
NCU05860	1.01209	0.00168341	0.000111247	52.0297	25.3969	Up
NCU05866	1.3843	1.26428e-12	2.78064e-14	185.855	70.2459	Up
NCU05869	1.45295	7.1146e-08	2.52996e-09	72.6609	26.118	Up
NCU05870	1.22882	0.000140299	7.64221e-06	48.9854	20.5633	Up
NCU05872	1.06382	0.00393798	0.000276665	42.966	20.1111	Up
NCU05882	1.32378	2.53049e-05	1.23534e-06	51.653	20.2931	Up
NCU05883	1.70047	2.37138e-11	6.01984e-13	81.9551	24.8559	Up
NCU05884	1.64125	1.09438e-12	2.38236e-14	109.373	34.4131	Up
NCU05885	1.51074	4.56406e-11	1.19144e-12	99.7211	34.3958	Up
NCU05886	1.46113	1.93421e-15	2.96194e-17	177.718	63.6091	Up
NCU05887	1.37355	1.09438e-12	2.39181e-14	159.553	60.4035	Up
NCU05888	1.34287	2.20868e-10	6.15163e-12	129.88	50.2507	Up
NCU05893	1.10256	0.0012115	7.84422e-05	46.087	21.1099	Up
NCU05895	1.47359	7.81158e-08	2.80189e-09	69.7198	24.5845	Up
NCU05897	1.69295	4.08914e-13	8.36319e-15	262.067	80.7549	Up
NCU05899	1.36689	3.81506e-12	8.93971e-14	199.154	76.5404	Up
NCU05901	1.51918	2.99205e-14	5.19688e-16	135.417	46.4784	Up
NCU05902	1.24855	5.74591e-12	1.35233e-13	176.128	72.8848	Up
NCU07126	1.08297	0.000482057	2.86212e-05	54.7048	25.5219	Up
NCU07127	1.08574	0.000613141	3.72073e-05	54.6968	25.4628	Up
NCU07129	1.52153	1.98657e-11	4.92049e-13	136.578	47.18	Up
NCU07130	1.40692	1.60163e-14	2.69956e-16	191.702	71.3347	Up
NCU07133	1.13375	6.3913e-09	2.04942e-10	143.75	64.4669	Up
NCU07134	1.40306	2.66241e-12	6.15666e-14	191.419	71.0266	Up
NCU07135	1.42121	3.76185e-06	1.65355e-07	64.3282	23.4107	Up
NCU07136	1.63933	6.22323e-21	4.79694e-23	283.427	89.5091	Up
NCU07139	1.28194	2.82091e-10	7.91478e-12	189.44	76.6988	Up
NCU07149	1.01472	7.58812e-07	3.08828e-08	318.819	155.511	Up
NCU07153	1.01823	0.00459521	0.000328229	44.5144	21.4859	Up
NCU07162	1.38373	2.17678e-11	5.45872e-13	121.54	45.8524	Up
NCU07163	1.29064	2.38449e-11	6.07763e-13	149.953	60.3524	Up
NCU07164	1.68543	1.1733e-15	1.71231e-17	162.344	49.6695	Up
NCU07167	1.0601	0.000482057	2.86361e-05	57.3338	27.0763	Up
NCU07168	1.04195	2.52814e-05	1.23159e-06	81.978	39.294	Up
NCU07169	1.52264	1.29869e-06	5.44567e-08	52.2341	17.9065	Up
NCU07170	1.3339	3.79967e-07	1.49566e-08	74.1117	28.8236	Up
NCU07177	2.03869	4.96431e-16	7.1429e-18	92.4157	22.1799	Up
NCU07194	1.12728	0.00100226	6.36587e-05	47.0113	21.1678	Up
NCU07200	1.28268	5.04152e-05	2.55962e-06	52.2237	21.0897	Up
NCU07201	1.17704	7.48474e-06	3.44621e-07	77.0461	33.7446	Up
NCU07202	1.73713	7.97997e-11	2.10776e-12	78.3077	23.206	Up
NCU07203	1.56084	3.2213e-08	1.09915e-09	67.9469	22.5957	Up
NCU07204	1.59836	3.19569e-12	7.45551e-14	106.863	34.8701	Up
NCU07205	1.49971	7.7577e-08	2.77459e-09	74.2344	25.808	Up
NCU07206	1.10394	4.99074e-06	2.22609e-07	92.2172	42.3349	Up
NCU07208	1.03788	6.95008e-08	2.46431e-09	205.841	99.1541	Up
NCU07209	1.05618	1.63335e-07	6.14396e-09	306.773	145.918	Up
NCU07231	1.55116	8.7194e-17	1.16498e-18	204.957	68.9907	Up
NCU07240	1.33251	8.8404e-05	4.66097e-06	45.742	17.7196	Up
NCU07241	1.21264	3.29769e-10	9.42198e-12	150.824	64.175	Up
NCU07242	1.00834	8.96691e-08	3.24394e-09	270.759	132.751	Up
NCU07354	1.98474	4.31457e-13	8.86859e-15	74.5798	18.4889	Up
NCU07520	1.25862	0.000427453	2.4997e-05	54.6463	22.6325	Up
NCU07532	1.01695	0.0319958	0.00274907	27.5182	13.3688	Up
NCU07583	1.29077	2.01617e-05	9.67677e-07	56.2927	22.5612	Up
NCU08049	1.20504	9.22181e-10	2.74853e-11	148.254	63.3296	Up
NCU08050	1.95663	1.29808e-16	1.77564e-18	108.401	27.4673	Up
NCU08051	2.08452	1.68334e-15	2.56048e-17	90.1768	20.8543	Up
NCU08052	1.50424	3.39549e-07	1.3226e-08	60.1116	20.8677	Up
NCU08056	1.10014	0.00104795	6.6668e-05	48.3803	22.1512	Up
NCU08060	1.0946	2.75679e-05	1.35271e-06	86.9605	40.1145	Up
NCU08190	1.36392	5.48669e-07	2.21046e-08	73.7104	28.2308	Up
NCU08191	1.46946	1.88347e-08	6.27177e-10	124.011	44.4063	Up
NCU08192	1.39511	3.32251e-07	1.29076e-08	138.647	51.9194	Up
NCU08193	1.30018	0.000172645	9.57092e-06	55.3196	22.03	Up
NCU08195	1.01867	0.0238415	0.00198965	32.4728	15.7519	Up
NCU08197	1.28925	5.47653e-06	2.45403e-07	86.577	35.0312	Up
NCU08199	1.63993	6.01857e-11	1.58351e-12	122.773	39.075	Up
NCU08200	1.78564	3.54005e-13	7.16743e-15	167.789	48.119	Up
NCU08258	1.09315	1.13989e-06	4.74466e-08	340.171	157.143	Up
NCU08556	1.27772	2.30323e-05	1.11493e-06	67.5279	27.4557	Up
NCU08614	1.60633	9.31528e-08	3.37954e-09	59.1488	19.0875	Up
NCU08615	1.88024	2.8368e-10	8.01769e-12	64.2123	17.0687	Up
NCU08622	1.65117	1.07972e-08	3.5066e-10	66.0474	20.5039	Up
NCU08623	1.76505	9.3955e-10	2.80996e-11	69.7343	20.1692	Up
NCU08624	1.65813	1.02075e-09	3.06331e-11	74.2401	23.1058	Up
NCU08625	1.34089	4.09943e-05	2.05604e-06	49.2348	19.0444	Up
NCU08626	1.13762	0.00357478	0.000248728	36.7469	16.3416	Up
NCU08628	1.43672	9.90791e-06	4.60265e-07	48.1187	17.3668	Up
NCU08629	1.57057	1.64435e-11	4.00526e-13	99.751	32.952	Up
NCU08631	1.44594	2.37138e-11	6.00691e-13	118.263	42.6289	Up
NCU08632	1.84461	1.23173e-09	3.7471e-11	59.8799	16.3277	Up
NCU08634	2.20316	1.54466e-21	1.09539e-23	180.731	38.5661	Up
NCU08635	1.15318	2.73898e-08	9.31758e-10	140.122	61.8988	Up
NCU08636	1.70983	1.44939e-10	3.93257e-12	74.4413	22.3384	Up
NCU08637	1.19466	2.25671e-08	7.6074e-10	115.828	49.7222	Up
NCU08641	1.24234	8.45485e-11	2.24188e-12	178.376	74.503	Up
NCU08642	1.19242	7.71554e-07	3.14807e-08	85.2301	36.7239	Up
NCU08760	1.99391	1.21814e-23	6.25971e-26	207.78	51.173	Up
NCU08763	1.46254	5.35218e-13	1.12214e-14	130.928	46.6241	Up
NCU08771	1.25256	4.84496e-05	2.44987e-06	55.8099	22.862	Up
NCU08773	1.52112	1.57738e-07	5.90098e-09	62.1714	21.2001	Up
NCU08775	1.10831	0.000349197	2.01336e-05	54.3428	24.8563	Up
NCU08783	1.74464	2.89027e-10	8.22821e-12	98.5032	28.8425	Up
NCU09156	1.05587	0.000483098	2.87475e-05	57.4045	27.2173	Up
NCU09160	1.07124	0.00194257	0.00013037	44.7065	20.8112	Up
NCU09182	1.15276	0.000114322	6.09793e-06	139.885	62.1373	Up
NCU09183	1.29589	1.58688e-07	5.95284e-09	309.232	125.413	Up
NCU09296	1.09661	0.000195858	1.09503e-05	60.1229	27.6272	Up
NCU09299	1.64113	7.38149e-12	1.75244e-13	92.1333	29.0106	Up
NCU09300	1.11838	0.00013033	7.0456e-06	61.1187	27.744	Up
NCU09301	1.61601	1.04869e-12	2.26337e-14	104.174	33.3592	Up
NCU09302	1.18439	1.20188e-06	5.02737e-08	94.0926	40.4374	Up
NCU09470	1.36711	6.37644e-05	3.2898e-06	45.1546	17.1698	Up
NCU09471	1.81116	1.7645e-10	4.86008e-12	68.6598	19.1602	Up
NCU09472	1.64014	1.53575e-08	5.05076e-10	63.9911	20.2019	Up
NCU09473	1.49315	2.2063e-05	1.06347e-06	42.7402	14.9431	Up
NCU09479	1.09199	0.00115781	7.47669e-05	49.2599	22.7223	Up
NCU09481	1.10905	0.00109015	6.96888e-05	45.8273	20.8464	Up
NCU09482	1.14377	0.00418745	0.000296952	37.3205	16.5609	Up
NCU09484	1.44913	2.13394e-10	5.92153e-12	98.209	35.3358	Up
NCU09485	1.81489	1.09599e-11	2.62451e-13	75.0274	20.9118	Up
NCU09486	1.80754	4.01055e-20	3.55658e-22	191.492	53.8256	Up
NCU09487	2.07522	3.27092e-25	1.21021e-27	227.897	53.3446	Up
NCU09488	1.75263	1.09438e-12	2.39572e-14	88.8957	25.9318	Up
NCU09492	1.3042	1.15756e-10	3.12886e-12	143.237	57.2142	Up
NCU09500	1.08364	0.00612886	0.000447854	37.1065	17.2024	Up
NCU09502	1.23405	0.000165064	9.07598e-06	49.3094	20.5981	Up
NCU09503	1.40809	5.812e-05	2.98664e-06	44.7703	16.4725	Up
NCU09504	1.26289	6.71065e-05	3.47602e-06	52.0116	21.3117	Up
NCU09505	1.22348	6.62794e-06	3.02817e-07	66.4831	27.9996	Up
NCU09508	1.5624	1.50796e-08	4.94387e-10	68.323	22.6721	Up
NCU09510	1.07942	0.00322872	0.000222991	42.1729	19.5214	Up
NCU09511	2.10131	1.1951e-15	1.7687e-17	94.7779	21.7225	Up
NCU09512	1.51283	8.72026e-08	3.13679e-09	67.1256	23.1833	Up
NCU09513	1.33611	1.31963e-05	6.23875e-07	55.246	21.4967	Up
NCU09516	1.36562	1.06951e-05	4.97933e-07	53.4418	20.3318	Up
NCU09518	1.25927	1.03005e-09	3.11238e-11	157.395	64.6277	Up
NCU09519	1.06739	3.72845e-07	1.46379e-08	219.654	103.076	Up
NCU09520	1.53219	2.00573e-20	1.71095e-22	227.705	77.6045	Up
NCU09521	1.71609	9.12527e-14	1.67875e-15	103.604	30.8794	Up
NCU09522	1.96693	2.03531e-12	4.60193e-14	83.8538	20.8984	Up
NCU09523	2.00467	4.4341e-21	3.32671e-23	190.619	46.323	Up
NCU09524	1.0617	5.09676e-09	1.6186e-10	277.594	130.468	Up
NCU09526	1.0367	1.84518e-08	6.12532e-10	304.668	146.154	Up
NCU09574	1.21112	1.01308e-06	4.17517e-08	80.873	34.4003	Up
NCU09575	1.29597	0.000128231	6.90576e-06	48.8973	19.5895	Up
NCU09576	1.20959	0.00176399	0.000116935	39.2927	16.7022	Up
NCU09578	1.23279	3.27874e-13	6.60466e-15	243.101	101.734	Up
NCU09582	1.14882	5.26549e-07	2.11594e-08	141.447	62.7843	Up
NCU09594	1.42529	5.11143e-07	2.04352e-08	64.0882	23.3356	Up
NCU09595	1.30004	1.14946e-05	5.36336e-07	60.4401	24.0644	Up
NCU09596	1.04209	0.000476462	2.81078e-05	58.361	27.833	Up
NCU09598	1.15196	0.00073872	4.58568e-05	47.6426	21.0225	Up
NCU09609	1.48043	4.93674e-06	2.19693e-07	49.3713	17.3332	Up
NCU09610	1.6217	4.36342e-08	1.51576e-09	60.392	19.2013	Up
NCU09611	1.47419	6.26304e-09	2.00186e-10	80.4785	28.4034	Up
NCU09615	1.24166	3.2064e-05	1.58837e-06	57.3364	23.7461	Up
NCU09616	1.67268	5.13633e-13	1.06633e-14	100.821	31.1712	Up
NCU09617	1.30393	2.3965e-10	6.69937e-12	147.205	58.8024	Up
NCU09642	1.01215	4.34303e-05	2.18267e-06	84.3151	41.059	Up
NCU09648	1.08601	2.80307e-06	1.2186e-07	97.1219	44.9687	Up
NCU09649	1.24231	6.73393e-07	2.72679e-08	79.013	32.7327	Up
NCU09652	1.29585	1.50572e-09	4.61157e-11	110.742	44.5615	Up
NCU09653	1.25632	2.06367e-08	6.93547e-10	99.2923	40.9463	Up
NCU09654	1.37976	3.52921e-07	1.38194e-08	67.3634	25.4392	Up
NCU09725	1.0248	4.0037e-07	1.58008e-08	314.501	153.083	Up
NCU09757	1.09	0.011582	0.000905845	31.4427	14.4144	Up
NCU09762	1.05521	0.00926692	0.000704781	35.8798	16.9146	Up
NCU09775	1.15392	0.00380977	0.000266645	35.3782	15.6475	Up
NCU09851	1.1881	1.94904e-06	8.34661e-08	98.5799	42.9209	Up
NCU09852	1.10206	0.000721851	4.45871e-05	52.0304	23.9879	Up
NCU09853	1.23328	2.49981e-05	1.21522e-06	59.5568	24.9023	Up
NCU09854	1.75878	1.49282e-10	4.06575e-12	87.6852	25.5804	Up
NCU09901	1.33112	2.15471e-11	5.38124e-13	183.409	71.8873	Up
NCU09904	1.75381	5.66618e-11	1.48497e-12	219.163	64.8799	Up
NCU09906	1.14662	5.02974e-06	2.24865e-07	247.917	111.427	Up
NCU09910	1.08834	9.03181e-07	3.69441e-08	106.845	49.5773	Up
NCU09912	1.14989	0.000128987	6.9597e-06	60.1436	26.5283	Up
NCU09913	1.36564	1.20529e-13	2.29166e-15	173.848	66.373	Up
NCU09914	1.2347	2.88866e-10	8.19392e-12	180.504	75.4011	Up
NCU09958	1.07544	2.02217e-08	6.77521e-10	181.337	85.0148	Up
NCU09959	1.58122	8.7909e-15	1.44557e-16	154.899	51.113	Up
NCU09964	1.27144	3.76185e-06	1.65475e-07	198.33	81.9894	Up
NCU09968	1.1822	0.310913	0.0350856	11.5412	5.0773	Up
NCU09969	1.01106	0.242268	0.0262437	19.8126	9.95013	Up
NCU10001	1.07696	0.000365716	2.11236e-05	57.586	26.7301	Up
NCU10002	1.01748	0.00521317	0.000376185	41.307	20.0614	Up
NCU10004	1.17415	1.92769e-08	6.43885e-10	200.852	88.0741	Up
NCU10040	1.10074	5.08561e-09	1.60589e-10	226.474	103.835	Up
NCU10052	1.18506	0.00029606	1.68873e-05	50.1804	21.8134	Up
NCU10537	1.47217	1.61249e-10	4.40824e-12	98.431	34.9161	Up
NCU10597	1.68288	5.20882e-17	6.69171e-19	151.171	46.3818	Up
NCU11134	1.65373	1.1552e-10	3.1106e-12	195.409	61.51	Up
NCU11216	1.50284	1.94904e-06	8.35302e-08	59.5756	20.6773	Up
NCU11220	1.41529	6.9421e-06	3.18209e-07	52.3412	19.2605	Up
NCU11289	1.19117	0.000588656	3.55129e-05	46.539	19.9831	Up
NCU11305	1.73331	5.27011e-15	8.50367e-17	116.444	34.3521	Up
NCU11306	1.04167	0.000613141	3.72985e-05	58.3564	27.8986	Up
NCU11405	1.41048	2.25244e-12	5.11602e-14	134.168	49.5323	Up
NCU11406	1.9231	6.34337e-13	1.33648e-14	78.0144	20.1737	Up
NCU11409	1.22272	5.08561e-09	1.60983e-10	112.574	47.3979	Up
NCU11415	1.3621	9.78298e-07	4.01173e-08	64.83	24.787	Up
NCU11417	1.06128	0.00664261	0.000489492	38.8807	18.3412	Up
NCU12065	1.07741	1.08126e-08	3.5227e-10	190.722	89.4158	Up
NCU12150	1.14742	0.00106697	6.80972e-05	42.7016	18.9612	Up
NCU12156	1.39923	6.62794e-06	3.03128e-07	55.0522	20.3371	Up
NCU16303	2.48884	1.8133e-24	7.82718e-27	127.567	22.3325	Up
NCU16346	1.05266	0.0142974	0.00113439	32.2637	15.2608	Up
NCU16496	1.35803	3.85998e-05	1.92404e-06	47.9015	18.2567	Up
NCU16497	1.72832	5.28776e-10	1.53796e-11	67.5205	19.9818	Up
NCU16538	1.35755	1.13071e-07	4.1835e-09	109.226	41.8472	Up
NCU16539	1.08091	0.000445652	2.6107e-05	58.0956	26.9495	Up
NCU16540	1.22528	8.8404e-05	4.66068e-06	57.062	24.0178	Up
NCU16606	1.82907	1.41982e-12	3.15192e-14	82.1681	22.7304	Up
NCU16708	1.53925	1.63408e-07	6.16349e-09	72.6857	24.6471	Up
NCU16905	1.29109	1.98962e-12	4.47818e-14	198.001	79.4675	Up
NCU17050	1.74831	1.88177e-12	4.2161e-14	87.4226	25.4956	Up
NCU17051	1.81674	8.96513e-18	1.06881e-19	129.441	36.2188	Up
NCU17057	1.29502	4.69887e-07	1.86892e-08	78.6257	31.5381	Up
NCU17058	1.16784	0.000115227	6.15907e-06	56.4489	24.7187	Up
NCU17150	1.22217	4.93476e-07	1.96782e-08	130.398	55.3404	Up
NCU17282	1.27932	1.93306e-11	4.74821e-13	174.064	70.7407	Up
NCU17283	1.10094	7.20148e-10	2.12418e-11	158.775	72.9299	Up
NCU17284	1.14103	0.00042592	2.48198e-05	51.0493	22.8327	Up
NCU00840	-1.05185	0.0172415	0.00138216	16.0504	32.8721	Down
NCU00841	-1.03719	0.0280968	0.00239097	16.0057	32.3788	Down
NCU02193	-1.05193	0.0273954	0.00232565	13.0707	26.867	Down
NCU02194	-1.10013	0.00618857	0.000454125	17.1679	36.6008	Down
NCU02196	-1.22273	0.000612687	3.70886e-05	19.1575	44.4992	Down
NCU02197	-1.08577	0.0181568	0.00147046	18.0027	38.4661	Down
NCU02858	-1.02682	0.0213675	0.00175464	16.9715	33.9181	Down
NCU02867	-1.16382	0.00115781	7.48471e-05	19.5566	43.156	Down
NCU03469	-1.24285	7.13757e-05	3.70449e-06	21.8512	51.1215	Down
NCU03470	-1.27044	0.000180975	1.00811e-05	19.2338	45.7448	Down
NCU03472	-1.84149	1.8176e-10	5.02503e-12	18.5452	65.6089	Down
NCU03473	-1.66	3.70254e-10	1.06548e-11	24.583	76.7659	Down
NCU03474	-1.76049	6.5326e-10	1.91345e-11	19.2562	64.6603	Down
NCU03475	-2.08681	1.11038e-14	1.83732e-16	19.0163	79.9012	Down
NCU03476	-1.92924	1.45212e-11	3.50718e-13	18.493	70.0247	Down
NCU03477	-1.51428	2.19983e-06	9.47305e-08	17.4361	49.4354	Down
NCU03875	-2.35623	0.000419374	2.43522e-05	3.09595	16.1627	Down
NCU04502	-1.179	0.00846931	0.000639768	12.1581	27.4898	Down
NCU04559	-1.11889	0.00833416	0.000628129	15.4875	33.2597	Down
NCU04689	-1.95183	1.20023e-16	1.61938e-18	41.2436	157.496	Down
NCU04690	-1.39324	1.68151e-06	7.15462e-08	27.5481	71.9394	Down
NCU04691	-1.73382	9.91824e-08	3.63781e-09	19.1182	63.4741	Down
NCU04694	-2.39113	7.66775e-22	5.20115e-24	21.1594	110.112	Down
NCU04695	-1.95881	5.35218e-13	1.11936e-14	22.8433	88.5788	Down
NCU04697	-2.00171	5.19472e-14	9.12946e-16	20.4397	81.1808	Down
NCU04698	-1.36498	0.000325336	1.86575e-05	15.0527	38.5724	Down
NCU04699	-1.27012	0.00114719	7.38069e-05	14.8994	35.7047	Down
NCU04700	-2.40196	6.20943e-17	8.16862e-19	17.4724	91.8632	Down
NCU04701	-2.73716	3.89233e-24	1.76015e-26	17.4408	115.93	Down
NCU04702	-2.75005	4.41584e-26	1.45228e-28	16.8719	112.539	Down
NCU04703	-2.83296	4.18363e-25	1.63389e-27	15.307	108.413	Down
NCU04704	-3.01149	7.30102e-26	2.55123e-28	15.4302	123.863	Down
NCU04705	-2.89563	4.63916e-22	3.05145e-24	15.4731	115.032	Down
NCU04706	-3.0397	6.05633e-22	4.04586e-24	17.2627	140.372	Down
NCU04707	-3.16259	4.41294e-22	2.8573e-24	16.1128	142.844	Down
NCU04708	-3.08209	5.82271e-23	3.23151e-25	17.4708	147.343	Down
NCU04709	-2.82795	5.38964e-19	5.48381e-21	17.2274	120.755	Down
NCU04710	-2.87021	1.39125e-28	2.51222e-31	16.0935	116.895	Down
NCU04713	-1.27366	0.000937832	5.92772e-05	16.1009	38.7416	Down
NCU04722	-1.06238	0.00493201	0.000354314	21.7572	45.3406	Down
NCU04851	-1.28607	0.000172354	9.52997e-06	18.5589	44.85	Down
NCU04852	-2.32133	1.78423e-20	1.50367e-22	21.2296	105.34	Down
NCU04853	-2.0907	1.63579e-13	3.19425e-15	18.3076	77.5213	Down
NCU04857	-1.05897	0.0218778	0.00180329	13.8918	28.6337	Down
NCU04860	-2.75085	2.5703e-26	6.86823e-29	16.9578	113.611	Down
NCU04861	-2.06879	7.07124e-13	1.50436e-14	16.5134	68.7289	Down
NCU04862	-1.83927	8.07474e-09	2.60582e-10	16.1334	57.6188	Down
NCU04866	-1.12605	0.0115678	0.000903552	14.5043	31.499	Down
NCU04867	-3.02132	8.14501e-29	1.25565e-31	16.3228	131.111	Down
NCU04869	-3.40774	2.60797e-32	1.07214e-35	14.6765	155.305	Down
NCU04870	-2.753	4.184e-20	3.82709e-22	14.7382	99.1565	Down
NCU04871	-2.63327	9.07635e-22	6.34319e-24	17.078	105.429	Down
NCU04874	-2.8444	6.28062e-28	1.29098e-30	18.1452	129.178	Down
NCU04875	-2.92867	5.99876e-19	6.16522e-21	16.1377	122.39	Down
NCU04876	-2.92228	4.41584e-26	1.41393e-28	15.5699	117.252	Down
NCU04877	-2.98828	6.68344e-29	8.92957e-32	17.2841	136.596	Down
NCU04879	-3.71854	3.45462e-32	1.77524e-35	10.0293	131.622	Down
NCU04880	-1.15214	0.00691045	0.00051278	16.5741	36.76	Down
NCU04881	-2.73308	2.5703e-26	6.73914e-29	19.263	127.265	Down
NCU04882	-3.41956	1.39125e-28	2.29676e-31	13.0997	139.506	Down
NCU04883	-2.56286	4.39699e-23	2.39507e-25	17.9775	105.529	Down
NCU04884	-2.11746	2.43188e-12	5.59856e-14	17.6396	76.4158	Down
NCU04885	-1.15895	0.00665743	0.000491952	14.6971	32.5661	Down
NCU04886	-2.50528	1.09948e-18	1.17519e-20	17.8667	101.354	Down
NCU04887	-2.72112	8.14151e-21	6.52659e-23	15.5983	102.583	Down
NCU04888	-2.83698	5.16641e-26	1.75223e-28	19.2802	137.512	Down
NCU04889	-2.50354	1.9619e-23	1.0485e-25	27.1207	152.097	Down
NCU04890	-2.42423	3.51903e-21	2.60401e-23	24.5762	130.277	Down
NCU04891	-2.4357	1.43235e-22	8.24372e-25	26.5388	141.752	Down
NCU04892	-2.50264	8.12805e-24	4.04253e-26	28.9304	161.998	Down
NCU04893	-2.6956	1.45858e-19	1.40911e-21	25.738	164.818	Down
NCU04894	-2.66113	3.77992e-26	1.08775e-28	24.6947	154.876	Down
NCU04896	-2.76097	1.93373e-29	1.98739e-32	18.8433	126.74	Down
NCU04897	-2.99539	1.11371e-39	2.28923e-43	20.3399	160.683	Down
NCU04900	-2.64975	8.12805e-24	4.09326e-26	21.7613	136.185	Down
NCU04901	-2.47691	9.08741e-19	9.61977e-21	17.3934	96.4461	Down
NCU04902	-1.25653	0.000613141	3.73052e-05	17.4022	41.3061	Down
NCU04903	-1.69381	1.03181e-07	3.80697e-09	17.9493	57.9166	Down
NCU04906	-1.21692	0.00268519	0.000182417	15.1348	35.0823	Down
NCU04907	-2.21318	6.91283e-13	1.46356e-14	15.9553	73.9602	Down
NCU04908	-1.98372	9.00413e-10	2.6744e-11	14.0859	55.635	Down
NCU04909	-1.50464	2.62071e-05	1.28208e-06	15.4798	43.7035	Down
NCU04910	-2.50098	2.90418e-17	3.61156e-19	16.9767	95.8259	Down
NCU04911	-2.85181	2.00655e-27	4.33068e-30	19.494	139.508	Down
NCU04912	-2.17939	1.60811e-13	3.12367e-15	16.475	74.392	Down
NCU04913	-1.25249	0.00385456	0.000270176	13.9424	33.017	Down
NCU04914	-2.35002	6.38838e-18	7.41919e-20	20.6071	104.796	Down
NCU04915	-2.90308	5.26491e-30	4.32881e-33	22.8304	168.599	Down
NCU04916	-2.76243	3.64792e-25	1.38719e-27	19.5423	131.486	Down
NCU04917	-2.95362	9.41357e-30	8.70731e-33	17.0785	131.358	Down
NCU04918	-2.97074	2.81718e-28	5.50117e-31	18.3713	142.802	Down
NCU04919	-2.80226	2.4463e-24	1.0811e-26	20.0473	138.674	Down
NCU04920	-2.8032	5.44727e-24	2.57528e-26	15.4869	107.757	Down
NCU04921	-1.97406	1.65893e-10	4.55226e-12	15.8384	61.8912	Down
NCU04922	-2.02838	7.36225e-10	2.17916e-11	16.6605	68.3769	Down
NCU04923	-1.62275	2.57431e-07	9.81571e-09	18.0451	55.0841	Down
NCU04926	-2.41876	2.3445e-22	1.4137e-24	25.8535	137.221	Down
NCU04928	-1.52436	5.89542e-06	2.65991e-07	15.8754	45.3088	Down
NCU04933	-1.18585	0.0008263	5.1718e-05	18.4006	41.3987	Down
NCU04934	-1.44594	1.96093e-05	9.37137e-07	17.1971	46.5624	Down
NCU04935	-1.96666	2.70096e-11	6.93977e-13	17.645	68.5245	Down
NCU04936	-1.05775	0.0106588	0.000823781	16.5688	34.1782	Down
NCU04937	-2.28496	9.55055e-14	1.7668e-15	14.7925	71.697	Down
NCU04939	-1.106	0.0133499	0.00105372	14.2005	30.3983	Down
NCU04947	-1.37995	0.000164069	9.00443e-06	18.14	47.1863	Down
NCU04948	-1.50129	0.000104988	5.5677e-06	16.4521	46.5875	Down
NCU04949	-1.64542	5.61297e-07	2.26711e-08	19.0013	59.2664	Down
NCU04950	-1.43816	2.75679e-05	1.35431e-06	19.4885	52.7035	Down
NCU04951	-1.42662	0.000160423	8.78781e-06	16.7634	45.0086	Down
NCU05063	-1.04977	1.17576e-05	5.49816e-07	52.0951	106.658	Down
NCU05091	-1.09438	1.13526e-06	4.70544e-08	87.6485	184.966	Down
NCU05101	-1.60344	1.01683e-10	2.71712e-12	42.4352	128.233	Down
NCU05102	-1.68268	1.46344e-07	5.44465e-09	23.4522	75.4901	Down
NCU05105	-1.47328	4.95452e-09	1.55815e-10	40.2979	111.329	Down
NCU05106	-1.74453	2.03428e-13	4.0142e-15	39.6921	132.013	Down
NCU05107	-1.33613	4.5055e-09	1.41231e-10	62.528	156.261	Down
NCU05111	-1.52016	2.15471e-11	5.3683e-13	47.6658	134.861	Down
NCU05113	-1.09735	1.64449e-06	6.98022e-08	50.529	107.143	Down
NCU05114	-1.60901	1.11617e-13	2.08779e-15	45.1476	136.475	Down
NCU05115	-1.08569	0.000747892	4.6503e-05	25.2009	52.989	Down
NCU05131	-1.354	6.54067e-06	2.9712e-07	30.5312	77.8156	Down
NCU05154	-1.52927	1.83453e-05	8.7107e-07	20.9198	60.6371	Down
NCU05155	-2.24258	4.68694e-19	4.72066e-21	31.8354	149.937	Down
NCU05156	-2.16733	1.23114e-20	1.01224e-22	25.5425	113.81	Down
NCU05157	-1.79163	1.02673e-09	3.09179e-11	19.4923	67.0791	Down
NCU05158	-2.09131	9.08741e-19	9.53182e-21	30.6679	130.137	Down
NCU05159	-1.49089	3.47873e-07	1.3586e-08	23.4483	65.6859	Down
NCU05189	-1.06815	0.00294037	0.000201263	25.4132	53.0413	Down
NCU05190	-1.17565	0.000880007	5.54413e-05	18.3834	41.0403	Down
NCU05379	-1.17803	0.00142779	9.31803e-05	18.0496	40.4314	Down
NCU05761	-1.01368	0.0130846	0.0010301	19.5353	39.3497	Down
NCU05769	-1.49721	9.84015e-07	4.04528e-08	21.6477	60.6422	Down
NCU05906	-1.85666	7.42688e-21	5.87738e-23	43.8089	156.851	Down
NCU05907	-2.04605	1.20023e-16	1.62827e-18	23.3431	95.6183	Down
NCU05908	-2.11143	1.58992e-13	3.072e-15	19.1368	82.5587	Down
NCU05909	-2.38578	4.64066e-24	2.14625e-26	25.2566	131.109	Down
NCU05910	-2.36227	4.01055e-20	3.58894e-22	33.441	170.18	Down
NCU05911	-3.1532	1.56743e-41	1.61092e-45	21.7677	190.819	Down
NCU05912	-1.93637	1.35493e-19	1.29505e-21	42.8154	162.339	Down
NCU05914	-1.2688	5.21372e-05	2.65776e-06	21.2944	50.7033	Down
NCU05915	-1.29937	0.000468872	2.75155e-05	15.5952	38.062	Down
NCU05918	-1.7179	4.82147e-08	1.69965e-09	19.7715	64.9063	Down
NCU05919	-2.2805	7.99163e-22	5.50297e-24	26.1956	126.475	Down
NCU05920	-1.94015	3.13423e-17	3.92986e-19	30.8636	117.409	Down
NCU05921	-1.54282	7.49396e-07	3.04226e-08	19.2785	55.9479	Down
NCU05922	-1.20123	0.000689259	4.23615e-05	19.1592	43.852	Down
NCU06154	-1.37999	0.000139931	7.60778e-06	15.6488	40.3226	Down
NCU06155	-1.43086	1.28807e-05	6.06257e-07	17.785	47.3569	Down
NCU06156	-1.19683	0.00719068	0.000535052	12.5627	28.4621	Down
NCU06157	-1.68009	3.28387e-08	1.12387e-09	17.8004	56.4597	Down
NCU06159	-1.65287	2.56313e-08	8.69305e-10	19.5998	60.8837	Down
NCU06160	-1.54325	2.97239e-05	1.46329e-06	13.2618	38.3569	Down
NCU06161	-1.54602	3.04218e-07	1.16935e-08	19.9218	57.1625	Down
NCU06163	-2.30791	2.29109e-15	3.55554e-17	14.8037	72.467	Down
NCU06164	-1.74807	3.99735e-08	1.38449e-09	16.1692	53.5486	Down
NCU06165	-1.95846	1.9556e-11	4.82367e-13	17.6576	67.664	Down
NCU06885	-2.50655	6.76077e-19	7.01786e-21	16.2185	91.5773	Down
NCU06886	-2.3564	1.14438e-13	2.15233e-15	21.6363	110.048	Down
NCU06887	-2.70381	2.19662e-17	2.70908e-19	20.1697	130.837	Down
NCU06888	-2.75422	2.3445e-22	1.42164e-24	16.4101	109.875	Down
NCU06889	-2.51199	4.31566e-18	4.87896e-20	16.4787	93.3158	Down
NCU06895	-1.40742	0.000135875	7.35931e-06	15.7192	40.9567	Down
NCU06896	-2.61809	9.75055e-18	1.17247e-19	17.7919	108.141	Down
NCU06897	-2.82272	5.2791e-21	4.01494e-23	18.0741	127.907	Down
NCU06898	-2.86949	4.10561e-26	1.22367e-28	16.4919	120.348	Down
NCU06899	-2.80022	2.43447e-31	1.75142e-34	21.0442	145.657	Down
NCU06901	-2.41908	2.46227e-22	1.51836e-24	21.8879	116.156	Down
NCU06902	-2.783	7.40335e-29	1.06523e-31	18.5995	127.091	Down
NCU06903	-2.35776	5.21401e-17	6.75195e-19	17.8451	91.261	Down
NCU06904	-2.59803	2.05562e-19	2.00703e-21	16.966	102.288	Down
NCU06905	-1.96089	1.75929e-11	4.30329e-13	18.108	69.7092	Down
NCU07047	-1.08256	0.00962797	0.000735209	16.8886	35.6863	Down
NCU07048	-1.15365	0.00301512	0.000206689	18.102	40.1004	Down
NCU07049	-2.44614	1.16111e-18	1.25299e-20	19.7875	107.274	Down
NCU07050	-1.9571	2.9764e-14	5.1391e-16	23.0733	88.5846	Down
NCU07051	-2.03979	7.25148e-17	9.61398e-19	25.9101	104.634	Down
NCU07053	-2.18456	1.3031e-14	2.1696e-16	16.2414	73.2476	Down
NCU07054	-2.12194	2.73463e-13	5.45239e-15	15.7365	67.8718	Down
NCU07076	-1.47092	9.91824e-08	3.63907e-09	26.1835	72.055	Down
NCU07077	-1.36493	3.0252e-06	1.32139e-07	23.1368	59.0639	Down
NCU07082	-1.02997	0.00421864	0.000299597	20.3484	40.9572	Down
NCU07083	-1.46916	9.92713e-08	3.65253e-09	24.4762	66.8326	Down
NCU07084	-2.13757	2.75233e-21	2.00838e-23	29.2672	127.029	Down
NCU07085	-1.39101	4.45895e-08	1.55353e-09	35.3486	91.7504	Down
NCU07086	-2.18524	4.60654e-19	4.54499e-21	22.6509	102.091	Down
NCU07087	-1.47621	1.09975e-09	3.33428e-11	32.956	90.8397	Down
NCU07088	-1.58852	7.25973e-12	1.71607e-13	32.2754	96.1826	Down
NCU07089	-1.77996	3.15466e-12	7.32738e-14	27.9442	95.3082	Down
NCU07090	-2.14647	4.01055e-20	3.62722e-22	28.9216	127.097	Down
NCU07091	-2.62023	8.46476e-27	1.91392e-29	19.7315	119.611	Down
NCU07092	-1.70706	3.93925e-14	6.88256e-16	39.7372	128.46	Down
NCU07094	-1.39242	3.76457e-09	1.17232e-10	39.8623	103.661	Down
NCU07095	-1.1588	3.97262e-08	1.36776e-09	51.2168	112.903	Down
NCU07107	-1.62366	2.93116e-15	4.60912e-17	43.5019	132.434	Down
NCU07109	-1.30128	1.33654e-15	2.0055e-17	89.4914	217.701	Down
NCU07115	-1.0376	1.4486e-06	6.10406e-08	58.5965	118.367	Down
NCU07480	-1.1946	0.00100226	6.35958e-05	18.2112	41.1321	Down
NCU07618	-1.14257	0.000121568	6.52193e-06	28.8634	63.195	Down
NCU07622	-1.42888	2.05602e-06	8.83264e-08	22.128	58.9982	Down
NCU07623	-2.45062	4.21277e-22	2.6844e-24	20.0617	108.637	Down
NCU07624	-2.49805	4.16003e-26	1.28264e-28	22.3119	124.651	Down
NCU07625	-2.07684	9.32156e-21	7.56838e-23	33.8535	140.767	Down
NCU07626	-1.67509	5.44534e-17	7.10748e-19	59.1638	185.96	Down
NCU07627	-1.017	2.53977e-06	1.10152e-07	83.6263	166.217	Down
NCU07628	-1.15188	4.55078e-06	2.02049e-07	88.7899	195.192	Down
NCU07629	-1.18309	1.54131e-06	6.52641e-08	81.8097	182.562	Down
NCU07630	-1.21501	3.05829e-07	1.17868e-08	79.7335	182.187	Down
NCU07631	-1.27895	8.72698e-08	3.14817e-09	81.5956	195.246	Down
NCU07632	-1.84336	8.9785e-14	1.64252e-15	41.9517	148.436	Down
NCU07633	-2.03142	5.66689e-15	9.20215e-17	38.9229	156.808	Down
NCU07634	-1.84456	7.31389e-14	1.30793e-15	42.5619	150.455	Down
NCU07635	-1.83897	1.5695e-12	3.50032e-14	26.2241	92.6156	Down
NCU07636	-2.13548	4.50246e-17	5.73798e-19	27.7824	120.311	Down
NCU07637	-1.6846	6.95013e-14	1.23574e-15	55.3591	175.337	Down
NCU07638	-1.88476	1.86558e-13	3.66214e-15	40.6852	148.023	Down
NCU07640	-2.00152	2.5084e-16	3.53187e-18	37.5222	148.382	Down
NCU07641	-1.8754	8.3507e-14	1.51051e-15	44.4188	160.458	Down
NCU07642	-1.97011	1.27671e-15	1.9026e-17	38.0618	146.592	Down
NCU07643	-1.87954	1.62989e-14	2.76395e-16	41.3878	150.067	Down
NCU07644	-2.06594	1.50062e-18	1.66564e-20	43.407	178.853	Down
NCU07645	-2.30156	6.7545e-18	7.9138e-20	36.3265	175.934	Down
NCU07646	-2.86013	3.19208e-29	3.93679e-32	18.5223	133.262	Down
NCU07647	-2.41765	1.65702e-20	1.37943e-22	21.8154	114.595	Down
NCU07648	-2.28924	1.21557e-18	1.33675e-20	27.1983	131.403	Down
NCU07649	-1.05866	0.0113194	0.000882983	15.8519	32.625	Down
NCU07651	-2.17535	1.99895e-17	2.44476e-19	22.5774	100.892	Down
NCU07652	-2.21436	2.87974e-18	3.22602e-20	25.1413	115.538	Down
NCU07653	-2.07451	6.02646e-15	9.84797e-17	23.3469	97.691	Down
NCU07802	-1.01413	0.0320159	0.00275409	19.024	38.4868	Down
NCU08083	-1.09359	1.13526e-06	4.71372e-08	75.7665	159.496	Down
NCU08084	-1.51048	2.99655e-13	6.00541e-15	52.2905	146.993	Down
NCU08085	-2.20053	6.01298e-25	2.41014e-27	32.2921	147.168	Down
NCU08086	-2.10266	1.43931e-23	7.54417e-26	32.5397	137.9	Down
NCU08096	-1.29696	2.96496e-07	1.13662e-08	34.223	83.0619	Down
NCU08100	-1.25371	1.51418e-07	5.64899e-09	44.9412	105.478	Down
NCU08101	-1.44452	1.54459e-08	5.09572e-10	53.8229	145.345	Down
NCU08102	-1.76727	4.83576e-16	6.90823e-18	43.7277	147.159	Down
NCU08103	-2.37324	1.39125e-28	2.57375e-31	29.4803	151.096	Down
NCU08105	-1.90074	3.58378e-15	5.70901e-17	50.9986	187.335	Down
NCU08106	-1.3597	1.56467e-09	4.80818e-11	67.5815	171.32	Down
NCU08107	-1.13471	6.11692e-06	2.76613e-07	71.9978	156.013	Down
NCU08109	-1.3737	3.46196e-08	1.18838e-09	45.9087	117.648	Down
NCU08180	-1.35405	5.37294e-05	2.74445e-06	18.8297	47.7602	Down
NCU08182	-1.1737	0.000292275	1.66414e-05	27.1999	60.915	Down
NCU08187	-1.17281	0.00069961	4.31414e-05	26.3523	59.3415	Down
NCU08188	-1.7754	2.13233e-09	6.61834e-11	21.1633	72.1076	Down
NCU08431	-1.40324	2.44234e-05	1.18477e-06	19.037	49.9353	Down
NCU08799	-1.92737	4.05951e-13	8.26087e-15	26.4894	100.295	Down
NCU08800	-1.57426	4.43646e-07	1.75999e-08	31.892	94.8357	Down
NCU08801	-1.37684	5.73642e-05	2.94191e-06	30.5531	79.8039	Down
NCU08802	-1.38749	3.47813e-05	1.72655e-06	23.9643	62.7375	Down
NCU08812	-2.37258	4.6836e-13	9.67526e-15	15.9693	82.8629	Down
NCU08813	-2.12614	9.03304e-13	1.94029e-14	19.831	86.3756	Down
NCU08814	-2.14859	2.01584e-14	3.43915e-16	20.8962	92.3702	Down
NCU08816	-1.20066	0.00115685	7.45471e-05	19.8935	45.7165	Down
NCU08818	-1.41736	0.000653638	3.99707e-05	18.1047	48.7753	Down
NCU08829	-1.96412	8.91491e-11	2.37303e-12	15.8294	61.4417	Down
NCU08830	-2.3772	1.57388e-16	2.1837e-18	15.652	81.0212	Down
NCU08832	-2.22959	5.04073e-16	7.30465e-18	17.1166	79.6357	Down
NCU08833	-2.7707	2.22723e-26	5.49369e-29	16.5462	111.601	Down
NCU08834	-2.66965	6.9769e-24	3.37014e-26	16.1484	102.083	Down
NCU08835	-2.46699	8.66165e-20	8.18985e-22	17.1884	94.5674	Down
NCU08836	-2.36961	4.6472e-19	4.63287e-21	17.5102	89.8094	Down
NCU08837	-2.34501	1.17366e-15	1.7249e-17	14.5556	73.5405	Down
NCU08838	-1.47928	6.55615e-06	2.98497e-07	17.2439	47.7937	Down
NCU08839	-1.43275	0.000141057	7.69795e-06	14.4733	38.8795	Down
NCU08845	-1.61052	3.30056e-07	1.27884e-08	18.3329	55.77	Down
NCU08846	-1.36966	0.000108741	5.7779e-06	17.4235	44.855	Down
NCU08881	-1.23191	0.000314674	1.80137e-05	35.8665	84.7315	Down
NCU08883	-1.43268	4.1947e-07	1.65977e-08	34.1114	91.295	Down
NCU08915	-2.1312	1.1854e-18	1.29139e-20	33.7013	145.85	Down
NCU08916	-1.7957	1.30076e-12	2.87424e-14	35.1045	120.094	Down
NCU08917	-1.82594	1.10259e-13	2.05106e-15	37.7113	132.385	Down
NCU08918	-2.04773	6.03158e-18	6.94283e-20	31.9002	130.343	Down
NCU08921	-1.63451	1.84642e-07	7.00234e-09	20.9483	64.8751	Down
NCU09026	-1.63774	2.36716e-08	8.00407e-10	20.5528	63.5649	Down
NCU09027	-1.17824	0.00152195	0.000100264	17.7324	39.8595	Down
NCU09031	-1.52303	1.6607e-07	6.28095e-09	20.7942	59.1006	Down
NCU09046	-1.14929	0.00192421	0.00012894	18.6684	41.0323	Down
NCU09053	-1.09814	0.00852563	0.000644899	16.4939	34.8992	Down
NCU09451	-1.12768	0.000414613	2.40331e-05	23.3682	50.5248	Down
NCU09452	-1.43675	4.70351e-08	1.64509e-09	27.2322	73.0529	Down
NCU09453	-1.50888	2.29783e-12	5.24274e-14	43.0218	121.329	Down
NCU09834	-1.68543	1.32769e-09	4.05267e-11	30.4919	97.1552	Down
NCU09835	-2.03008	7.16746e-18	8.47131e-20	32.3976	130.623	Down
NCU09836	-2.33801	1.39227e-22	7.87e-25	28.6784	143.478	Down
NCU09837	-1.22065	2.82223e-07	1.079e-08	62.3987	143.276	Down
NCU09838	-1.39377	6.92184e-09	2.22666e-10	45.2831	117.961	Down
NCU09839	-1.47425	1.48648e-06	6.27896e-08	30.0773	83.2428	Down
NCU09939	-1.70161	2.35729e-11	5.93561e-13	36.5869	118.344	Down
NCU09988	-1.33881	2.99546e-05	1.47772e-06	22.6591	57.0697	Down
NCU09990	-1.44252	5.50266e-06	2.47139e-07	18.9182	51.0695	Down
NCU10344	-2.28474	5.80203e-20	5.42636e-22	20.8781	100.875	Down
NCU10502	-2.80778	1.02374e-26	2.41995e-29	17.2559	120.698	Down
NCU10538	-1.52971	4.06597e-09	1.27035e-10	28.9923	82.9888	Down
NCU10539	-1.84029	3.76785e-11	9.71975e-13	22.1163	78.7587	Down
NCU10644	-3.11009	1.66253e-36	5.12598e-40	16.9329	144.894	Down
NCU10836	-1.95769	5.79741e-09	1.84707e-10	13.9496	54.0688	Down
NCU11087	-1.09422	5.51471e-06	2.48247e-07	49.3058	103.152	Down
NCU11129	-2.16325	1.38262e-13	2.65724e-15	17.0904	76.3995	Down
NCU12044	-2.81378	3.53839e-26	9.81877e-29	18.6242	130.122	Down
NCU12045	-2.8565	2.04623e-31	1.2618e-34	18.8041	134.535	Down
NCU12050	-1.6486	2.83422e-10	7.98126e-12	24.849	77.2605	Down
NCU12051	-1.67308	1.36417e-14	2.2853e-16	35.2296	110.985	Down
NCU12067	-1.22738	1.42988e-08	4.67321e-10	45.7297	105.684	Down
NCU12068	-1.63565	1.20529e-13	2.29127e-15	40.8431	125.555	Down
NCU12069	-1.28188	1.64584e-08	5.44668e-10	51.8521	124.671	Down
NCU12075	-1.75307	7.11757e-10	2.09211e-11	20.1478	67.2371	Down
NCU12076	-2.4877	4.74166e-20	4.38592e-22	18.2303	101.856	Down
NCU12077	-2.95706	7.05396e-21	5.50977e-23	19.7145	151.241	Down
NCU12078	-2.8576	5.00248e-18	5.70683e-20	14.1999	102.858	Down
NCU12104	-1.30482	0.000365929	2.11735e-05	16.6761	40.5354	Down
NCU12137	-1.72651	1.57986e-11	3.83192e-13	45.9748	150.924	Down
NCU16307	-1.84252	3.19721e-15	5.06034e-17	32.2037	114.734	Down
NCU16472	-1.26711	0.000306486	1.75135e-05	17.8138	42.5167	Down
NCU16630	-1.17473	0.000977108	6.18601e-05	19.0988	42.9071	Down
NCU16728	-1.96319	1.02592e-10	2.75197e-12	31.1254	119.234	Down
NCU16729	-1.47751	2.26119e-06	9.76051e-08	19.3831	53.486	Down
NCU16738	-3.02197	2.10349e-29	2.37804e-32	14.4422	116.547	Down
NCU16740	-2.71168	2.42554e-25	8.72496e-28	21.2599	137.763	Down
NCU16741	-1.76273	5.78765e-08	2.0462e-09	15.3883	52.0022	Down
NCU16742	-2.58053	2.70885e-21	1.94881e-23	17.699	105.391	Down
NCU16743	-2.17674	2.38533e-12	5.46689e-14	16.2081	72.7642	Down
NCU16744	-2.39361	2.28958e-20	1.97661e-22	19.53	102.163	Down
NCU16745	-1.69438	9.50502e-08	3.45815e-09	16.6244	53.1836	Down
NCU16876	-2.27146	4.48195e-16	6.35672e-18	16.1791	77.2187	Down
NCU16925	-1.00376	0.0154172	0.00122957	19.5448	39.0247	Down
NCU16926	-1.85764	1.51928e-15	2.29531e-17	39.1652	139.875	Down
NCU16960	-1.07294	0.010248	0.000788871	17.0031	35.4552	Down
NCU17064	-1.0175	0.0130897	0.00103184	18.1722	36.1471	Down
NCU17066	-1.791	3.99714e-08	1.38031e-09	17.9811	62.2403	Down
NCU17135	-1.10436	0.0073734	0.000549405	21.024	45.1648	Down
NCU17137	-1.12441	0.0174826	0.00140328	18.4883	40.5094	Down
NCU17138	-1.25916	0.00112499	7.21476e-05	21.9101	52.5858	Down
NCU17161	-1.44421	4.73052e-08	1.66273e-09	26.8924	72.2358	Down
NCU17170	-2.41588	3.77404e-17	4.77088e-19	17.424	91.9981	Down
NCU17172	-2.8845	2.76048e-22	1.73062e-24	12.2044	89.6054	Down
NCU17202	-2.09109	5.91275e-14	1.04521e-15	17.3591	73.3079	Down
NCU17203	-2.01498	2.41928e-11	6.19117e-13	15.3486	61.8392	Down
NCU17205	-1.07356	0.00986001	0.000756981	17.1079	35.6724	Down
NCU17263	-1.39764	3.90604e-06	1.72219e-07	23.7604	62.059	Down
NCU00003	-0.0660401	1	0.89908	15.2859	15.8166	Other
NCU00004	-0.359598	1	0.342492	15.8337	20.018	Other
NCU00005	0.0921002	1	0.895687	15.2234	14.0873	Other
NCU00006	0.088676	1	0.809957	17.9292	16.6014	Other
NCU00007	0.130962	1	0.895687	15.3201	13.7682	Other
NCU00008	-0.0805921	1	0.897426	14.8	15.4177	Other
NCU00009	0.258519	1	0.561398	20.3415	16.5925	Other
NCU00010	0.0407353	1	1	16.7334	16.0244	Other
NCU00011	-0.16497	1	0.794851	13.8358	15.2516	Other
NCU00013	-0.022397	1	1	13.3751	13.4179	Other
NCU00014	-0.0358019	1	1	16.524	16.6894	Other
NCU00015	0.020647	1	1	16.136	15.6622	Other
NCU00017	0.104797	1	0.900657	16.8558	15.4526	Other
NCU00018	0.0697158	1	1	15.6124	14.6401	Other
NCU00019	-0.0295191	1	1	15.0981	15.1759	Other
NCU00021	0.258634	1	0.602936	16.0372	13.1887	Other
NCU00022	-0.00333464	1	1	16.446	16.1595	Other
NCU00023	-0.0520039	1	1	15.4224	15.7344	Other
NCU00024	-0.0494941	1	1	17.1265	17.4179	Other
NCU00025	0.00854032	1	1	15.9156	15.5765	Other
NCU00026	-0.0584984	1	1	16.1328	16.5136	Other
NCU00027	0.0529999	1	1	16.0227	15.2199	Other
NCU00028	-0.0659982	1	0.900657	15.6836	16.198	Other
NCU00029	-0.093797	1	0.89908	15.3573	16.1721	Other
NCU00030	0.133108	1	0.794851	15.5189	13.9233	Other
NCU00031	-0.196359	1	0.614668	14.7548	16.5957	Other
NCU00032	0.136259	1	0.794851	15.5116	13.9127	Other
NCU00033	-0.580258	0.901121	0.124934	14.5484	21.3523	Other
NCU00034	0.0415906	1	1	16.3044	15.584	Other
NCU00035	0.0613436	1	0.900657	16.5664	15.6331	Other
NCU00037	0.00255349	1	1	16.083	15.8186	Other
NCU00038	0.143084	1	0.791373	15.054	13.4272	Other
NCU00039	0.34983	1	0.496631	15.2452	11.7724	Other
NCU00040	-0.00908893	1	1	14.7103	14.607	Other
NCU00041	0.12843	1	0.804324	17.0754	15.3356	Other
NCU00042	0.0373583	1	1	15.8925	15.1764	Other
NCU00043	0.0443476	1	1	15.6794	14.9676	Other
NCU00045	-0.00161283	1	1	16.38	16.1568	Other
NCU00046	0.0676093	1	0.902162	16.8931	15.873	Other
NCU00047	0.167545	1	0.787713	14.852	12.9816	Other
NCU00048	-0.139297	1	0.815129	17.5217	18.9068	Other
NCU00050	-0.0953591	1	0.902162	16.1644	17.0166	Other
NCU00051	0.333782	1	0.44998	17.7101	13.8292	Other
NCU00052	0.135466	1	0.804324	17.124	15.3342	Other
NCU00054	0.0426561	1	1	17.0956	16.3241	Other
NCU00055	0.0318974	1	1	16.8996	16.3479	Other
NCU00056	0.114343	1	0.801314	16.6271	15.1792	Other
NCU00057	-0.0465057	1	1	13.8409	14.1	Other
NCU00059	0.194831	1	0.694014	15.6062	13.4136	Other
NCU00060	0.119067	1	0.895687	15.1237	13.7149	Other
NCU00061	0.0231121	1	1	15.2157	14.7345	Other
NCU00064	-0.0271661	1	1	13.9506	14.0207	Other
NCU00065	0.205047	1	0.596654	15.3884	13.1356	Other
NCU00066	0.0937134	1	0.893857	14.7531	13.6238	Other
NCU00067	-0.198699	1	0.694014	13.6867	15.4241	Other
NCU00068	0.163159	1	0.698894	16.0384	14.0802	Other
NCU00069	-0.0567267	1	1	17.9606	18.3525	Other
NCU00070	0.0288108	1	1	15.1921	14.7062	Other
NCU00071	-0.232048	1	0.561398	17.0648	19.8237	Other
NCU00072	0.0394826	1	1	16.1404	15.4726	Other
NCU00073	0.026864	1	1	14.7947	14.3175	Other
NCU00074	-0.00325329	1	1	17.9686	17.7	Other
NCU00075	0.184028	1	0.703547	16.8543	14.6007	Other
NCU00076	-0.0359808	1	1	16.7506	16.9435	Other
NCU00077	0.735231	0.700821	0.0919244	15.963	9.22262	Other
NCU00078	0.04963	1	1	16.1976	15.4147	Other
NCU00079	0.254234	1	0.532325	17.6243	14.5529	Other
NCU00080	-0.0562486	1	0.900657	15.872	16.2965	Other
NCU00081	0.0375126	1	1	17.1059	16.4483	Other
NCU00082	-0.356658	1	0.389071	14.4941	18.2782	Other
NCU00083	0.00447399	1	1	15.8227	15.5377	Other
NCU00084	0.226062	1	0.614668	17.0385	14.2963	Other
NCU00085	-0.00442599	1	1	15.8151	15.6033	Other
NCU00086	0.27325	1	0.525789	16.8646	13.7939	Other
NCU00087	-0.0978164	1	0.89908	14.9177	15.8317	Other
NCU00088	-0.329284	1	0.463836	14.9729	18.5298	Other
NCU00089	-0.0581109	1	0.903601	16.7359	17.1378	Other
NCU00090	-0.245271	1	0.556015	16.4362	19.2664	Other
NCU00091	-0.226849	1	0.625421	15.5633	17.9359	Other
NCU00092	0.213956	1	0.608934	16.4832	13.93	Other
NCU00093	0.58031	1	0.202652	15.0565	9.80752	Other
NCU00095	0.125538	1	0.794851	15.6369	14.1018	Other
NCU00096	0.0133459	1	1	17.0458	16.6296	Other
NCU00097	0.258158	1	0.608934	16.6004	13.6751	Other
NCU00099	0.472018	1	0.322251	14.594	10.4449	Other
NCU00100	-0.101441	1	0.900657	15.5397	16.385	Other
NCU00101	0.149893	1	0.712242	17.4211	15.4235	Other
NCU00102	-0.0717898	1	0.893857	13.8538	14.3477	Other
NCU00103	0.00526598	1	1	13.6863	13.4181	Other
NCU00104	0.069804	1	0.902162	17.2054	16.143	Other
NCU00105	0.01328	1	1	15.7644	15.3651	Other
NCU00106	-0.0398692	1	1	15.5643	15.7413	Other
NCU00107	-0.245911	1	0.614668	14.5135	16.872	Other
NCU00108	0.115536	1	0.89908	16.3264	14.8486	Other
NCU00109	0.0520879	1	1	16.1543	15.3608	Other
NCU00110	0.150999	1	0.79816	16.345	14.4838	Other
NCU00111	-0.0216843	1	1	17.8454	17.8382	Other
NCU00112	0.0473733	1	1	15.3248	14.5594	Other
NCU00114	-0.0607249	1	1	14.4867	14.8855	Other
NCU00115	-0.307862	1	0.44998	14.2147	17.5498	Other
NCU00116	0.0260611	1	1	16.5964	16.0195	Other
NCU00117	-0.197396	1	0.614668	14.8539	16.808	Other
NCU00118	-0.0219664	1	1	15.445	15.4223	Other
NCU00119	0.136779	1	0.79816	16.3297	14.6783	Other
NCU00120	0.146927	1	0.707991	16.923	15.0766	Other
NCU00121	-0.235374	1	0.614668	14.4584	16.7745	Other
NCU00122	0.12688	1	0.807202	17.6925	15.9311	Other
NCU00123	-0.320095	1	0.44998	13.9583	17.1843	Other
NCU00124	0.108812	1	0.89908	16.1685	14.7634	Other
NCU00125	-0.0331721	1	1	14.8487	14.9408	Other
NCU00126	-0.101597	1	0.897426	14.7545	15.6184	Other
NCU00127	0.141059	1	0.804324	17.3613	15.5175	Other
NCU00128	0.27273	1	0.457038	17.899	14.5803	Other
NCU00129	0.0168455	1	1	16.275	15.8188	Other
NCU00130	0.141694	1	0.794851	15.5388	13.9209	Other
NCU00132	0.0653908	1	1	17.2671	16.3027	Other
NCU00133	0.0565948	1	0.900657	16.4228	15.5814	Other
NCU00134	0.0226523	1	1	17.8309	17.3297	Other
NCU00135	-0.325537	1	0.442643	13.6353	16.9266	Other
NCU00136	0.181883	1	0.703547	16.479	14.3028	Other
NCU00137	-0.141907	1	0.801314	15.266	16.565	Other
NCU00138	0.0531544	1	1	17.1702	16.2926	Other
NCU00142	0.0775033	1	0.900657	16.4093	15.2611	Other
NCU00143	0.107638	1	0.903601	17.857	16.3691	Other
NCU00144	-0.189483	1	0.630471	16.132	18.0962	Other
NCU00145	-0.0117541	1	1	16.1431	16.0148	Other
NCU00146	0.00108218	1	1	16.405	16.1611	Other
NCU00147	0.234209	1	0.639988	19.8903	16.6181	Other
NCU00148	0.000356291	1	1	14.5504	14.3115	Other
NCU00149	0.104676	1	0.895687	15.3479	13.9957	Other
NCU00150	-0.071836	1	0.895687	14.1571	14.7053	Other
NCU00151	0.159749	1	0.698894	15.9492	14.0308	Other
NCU00152	0.126903	1	0.895687	15.1747	13.684	Other
NCU00153	-0.0992333	1	0.89908	14.9099	15.7227	Other
NCU00154	0.00465829	1	1	15.692	15.3967	Other
NCU00155	-0.104654	1	0.801314	15.3417	16.2634	Other
NCU00157	-0.216371	1	0.625421	15.6367	17.9385	Other
NCU00158	0.272095	1	0.583144	14.7597	11.9436	Other
NCU00159	0.102148	1	0.897426	15.5861	14.247	Other
NCU00160	0.210626	1	0.694014	15.6916	13.3928	Other
NCU00161	-0.0645197	1	0.89908	15.2593	15.7007	Other
NCU00162	-0.0509278	1	1	16.038	16.3492	Other
NCU00163	-0.154503	1	0.807202	15.9411	17.4587	Other
NCU00164	0.0325591	1	1	15.2654	14.6997	Other
NCU00166	-0.205807	1	0.620158	15.3131	17.39	Other
NCU00167	0.0948721	1	0.900657	16.5483	15.2979	Other
NCU00168	-0.109338	1	0.897426	14.6367	15.6234	Other
NCU00169	0.0886852	1	0.89908	16.037	14.8372	Other
NCU00170	-0.0152165	1	1	15.5513	15.4845	Other
NCU00171	0.0757002	1	0.89908	16.1559	15.1045	Other
NCU00172	-0.156471	1	0.712242	15.6452	17.1858	Other
NCU00173	-0.136812	1	0.727559	17.7505	19.1867	Other
NCU00175	-0.22801	1	0.561398	17.2561	19.9119	Other
NCU00176	-0.198032	1	0.720214	16.5189	18.5833	Other
NCU00177	0.0774611	1	1	16.2973	15.2263	Other
NCU00178	0.17718	1	0.720214	18.6794	16.2737	Other
NCU00179	-0.134419	1	0.791373	13.7861	14.8499	Other
NCU00180	-0.0909641	1	0.897426	14.6524	15.4025	Other
NCU00181	0.253512	1	0.608934	16.7927	13.8674	Other
NCU00182	-0.175577	1	0.712242	15.4495	17.2068	Other
NCU00183	0.170824	1	0.783853	14.1505	12.3555	Other
NCU00184	0.0178129	1	1	13.2312	12.9238	Other
NCU00185	0.178098	1	0.630471	18.4772	16.1204	Other
NCU00186	0.00357651	1	1	14.8147	14.5255	Other
NCU00187	0.172459	1	0.72396	19.1946	16.7923	Other
NCU00188	0.073421	1	0.895687	14.973	14.0197	Other
NCU00189	-0.225178	1	0.620158	15.0339	17.1388	Other
NCU00192	-0.412547	1	0.340907	11.5805	15.1846	Other
NCU00193	0.073156	1	0.900657	16.5532	15.4725	Other
NCU00194	0.237738	1	0.608934	16.7741	13.9969	Other
NCU00195	0.124809	1	0.804324	16.9824	15.2791	Other
NCU00196	0.0595685	1	1	16.1194	15.2396	Other
NCU00197	-0.385358	1	0.321103	14.0229	18.0676	Other
NCU00198	-0.274347	1	0.457038	14.7967	17.5312	Other
NCU00199	0.115539	1	0.79816	15.9919	14.5117	Other
NCU00200	-0.0672184	1	1	14.0389	14.5103	Other
NCU00201	0.320796	1	0.457038	18.1983	14.374	Other
NCU00202	0.125476	1	0.801314	16.7045	15.1485	Other
NCU00203	-0.137731	1	0.801314	15.175	16.4458	Other
NCU00204	-0.144236	1	0.804324	15.6959	17.0532	Other
NCU00205	0.0245238	1	1	14.6101	14.1357	Other
NCU00206	0.0826805	1	0.895687	15.1631	14.1075	Other
NCU00207	0.154737	1	0.716312	18.1003	16.0069	Other
NCU00208	0.136475	1	0.893857	14.8499	13.2943	Other
NCU00209	-0.124178	1	0.79816	14.7778	15.9045	Other
NCU00210	0.0568986	1	1	15.5983	14.697	Other
NCU00211	0.152654	1	0.791373	15.1111	13.3913	Other
NCU00212	-0.0704473	1	0.904978	17.3294	17.9106	Other
NCU00213	0.170301	1	0.804324	17.3965	15.1711	Other
NCU00214	0.164123	1	0.712242	17.6486	15.5631	Other
NCU00215	-0.264099	1	0.614668	14.4253	17.0655	Other
NCU00216	-0.106277	1	0.900657	15.5697	16.5261	Other
NCU00218	-0.538191	0.961015	0.135403	15.5927	22.3045	Other
NCU00219	0.114385	1	0.893857	14.6688	13.3259	Other
NCU00220	-0.204266	1	0.620158	15.1737	17.2889	Other
NCU00221	0.141696	1	0.79816	16.0188	14.2827	Other
NCU00222	-0.0682534	1	0.897426	14.7225	15.247	Other
NCU00223	-0.168942	1	0.79816	14.4091	15.9354	Other
NCU00224	0.221868	1	0.614668	16.8629	14.1708	Other
NCU00225	0.0310645	1	1	14.5122	13.9895	Other
NCU00226	0.0809883	1	1	15.7329	14.7005	Other
NCU00227	0.208837	1	0.614668	16.9982	14.4663	Other
NCU00229	-0.115978	1	0.812596	17.3602	18.5699	Other
NCU00230	-0.174014	1	0.712242	15.4372	17.1811	Other
NCU00231	0.036383	1	1	13.5898	13.0712	Other
NCU00232	0.12631	1	0.891927	14.2896	12.9202	Other
NCU00233	-0.229234	1	0.614668	14.6078	16.7772	Other
NCU00234	-0.0306554	1	1	15.4346	15.5416	Other
NCU00236	-0.369887	1	0.366311	13.3487	16.9473	Other
NCU00237	0.0762849	1	0.897426	15.5656	14.5338	Other
NCU00238	0.0403405	1	1	16.0457	15.3755	Other
NCU00239	0.253053	1	0.590066	15.2005	12.5616	Other
NCU00240	0.00143652	1	1	14.8504	14.5983	Other
NCU00241	0.221564	1	0.602936	15.9232	13.4382	Other
NCU00242	-0.0520396	1	1	12.9044	13.2309	Other
NCU00243	-0.117054	1	0.897426	14.6134	15.6532	Other
NCU00244	-0.117743	1	0.89908	14.9057	15.907	Other
NCU00245	0.380489	1	0.470892	13.8317	10.4998	Other
NCU00246	-0.0927564	1	0.812596	17.3286	18.191	Other
NCU00247	-0.205142	1	0.561398	17.3662	19.6152	Other
NCU00248	-0.121765	1	0.79816	14.5998	15.6215	Other
NCU00249	0.077905	1	0.89908	15.9414	14.8612	Other
NCU00250	-0.397511	1	0.427059	12.3744	16.1667	Other
NCU00251	0.134549	1	0.79816	16.2548	14.5543	Other
NCU00252	-0.0635409	1	0.902162	16.2789	16.7463	Other
NCU00253	0.266029	1	0.518973	16.4018	13.3821	Other
NCU00254	-0.272685	1	0.590066	12.5544	14.9093	Other
NCU00257	0.316198	1	0.496631	14.9742	11.7951	Other
NCU00258	-0.0340808	1	1	15.4137	15.5476	Other
NCU00259	0.0535208	1	0.903601	17.4875	16.5206	Other
NCU00260	0.112138	1	0.79816	16.0056	14.5748	Other
NCU00261	-0.0689453	1	1	15.5235	16.0375	Other
NCU00262	-0.208339	1	0.635322	16.7994	19.2592	Other
NCU00263	0.237099	1	0.620158	17.5428	14.6107	Other
NCU00264	0.0421155	1	1	17.5257	16.7628	Other
NCU00265	0.120885	1	0.891927	14.3643	13.0183	Other
NCU00267	-0.160322	1	0.720214	16.6088	18.3431	Other
NCU00268	-0.207391	1	0.625421	15.736	17.8858	Other
NCU00269	-0.0163324	1	1	15.3948	15.3628	Other
NCU00270	0.0375681	1	1	16.6339	15.9098	Other
NCU00271	-0.622923	0.516043	0.0639618	14.8962	22.5168	Other
NCU00272	0.119039	1	0.89908	16.2554	14.6878	Other
NCU00273	0.135744	1	0.791373	14.9442	13.3699	Other
NCU00274	0.0681701	1	1	15.7889	14.831	Other
NCU00275	-0.172568	1	0.716312	15.9329	17.7128	Other
NCU00276	0.0996897	1	0.89908	16.143	14.8239	Other
NCU00277	0.119982	1	0.893857	14.658	13.2733	Other
NCU00278	-0.24303	1	0.608934	13.9918	16.2934	Other
NCU00279	0.0384351	1	1	15.4406	14.8021	Other
NCU00280	0.219101	1	0.596654	15.3246	12.9526	Other
NCU00281	0.264983	1	0.602936	16.217	13.2512	Other
NCU00282	-0.0409641	1	1	16.5279	16.7618	Other
NCU00283	-0.235171	1	0.620158	15.0609	17.4205	Other
NCU00284	-0.129957	1	0.731021	18.3284	19.7094	Other
NCU00285	-0.0445738	1	1	17.0837	17.3197	Other
NCU00287	-0.0173729	1	1	15.9414	15.8652	Other
NCU00288	-0.115013	1	0.809957	16.857	17.9838	Other
NCU00289	-0.128181	1	0.89908	14.9363	16.1084	Other
NCU00290	-0.086714	1	0.902162	16.0972	16.7876	Other
NCU00291	-0.0551155	1	1	13.1837	13.5292	Other
NCU00292	0.0931593	1	0.889887	13.4305	12.3366	Other
NCU00293	0.113687	1	0.794851	15.514	14.0878	Other
NCU00294	0.0073043	1	1	15.9282	15.585	Other
NCU00295	-0.262388	1	0.538599	15.2451	18.0233	Other
NCU00296	0.0447207	1	1	16.1401	15.3825	Other
NCU00297	0.30941	1	0.422212	21.0072	16.6215	Other
NCU00298	0.184778	1	0.707991	16.9975	14.7104	Other
NCU00299	0.360897	1	0.335578	19.4497	14.856	Other
NCU00300	-0.0600739	1	0.900657	15.8502	16.3093	Other
NCU00301	-0.027432	1	1	14.5861	14.632	Other
NCU00302	0.0631155	1	1	15.6734	14.7633	Other
NCU00303	-0.201112	1	0.712242	15.3797	17.4257	Other
NCU00304	-0.137563	1	0.712242	15.8345	17.1785	Other
NCU00305	0.050056	1	1	15.7445	15.046	Other
NCU00306	0.188577	1	0.794851	15.837	13.6704	Other
NCU00307	-0.269563	1	0.602936	13.3803	15.9002	Other
NCU00308	-0.0219053	1	1	14.0442	14.0224	Other
NCU00309	-0.17439	1	0.79816	14.4601	16.1265	Other
NCU00310	0.0308912	1	1	14.7404	14.2086	Other
NCU00311	0.0753769	1	0.897426	15.5002	14.4607	Other
NCU00312	-0.0940205	1	0.903601	16.5349	17.3728	Other
NCU00313	0.456043	1	0.28926	16.64	11.953	Other
NCU00314	-0.0116889	1	1	14.8179	14.7457	Other
NCU00315	-0.193315	1	0.712242	15.6343	17.6838	Other
NCU00316	-0.00446138	1	1	17.6761	17.3869	Other
NCU00317	-0.0120107	1	1	14.5637	14.5254	Other
NCU00318	0.0548789	1	0.902162	16.9541	16.0423	Other
NCU00319	-0.118582	1	0.815129	17.4237	18.6296	Other
NCU00320	0.0854654	1	0.900657	16.441	15.252	Other
NCU00321	-0.000255818	1	1	15.186	14.9763	Other
NCU00322	-0.427286	1	0.288805	15.495	20.5574	Other
NCU00324	0.0906746	1	0.89908	16.2178	14.9994	Other
NCU00325	0.0771315	1	1	16.8606	15.7679	Other
NCU00326	-0.0198458	1	1	16.5261	16.42	Other
NCU00327	-0.26312	1	0.544629	15.4192	18.188	Other
NCU00329	-0.0355398	1	1	15.6259	15.7374	Other
NCU00330	0.0659664	1	0.895687	14.8813	13.975	Other
NCU00331	0.238846	1	0.602936	16.2888	13.6168	Other
NCU00332	0.193564	1	0.698894	16.3397	14.0635	Other
NCU00333	-0.0846949	1	0.897426	14.8161	15.5043	Other
NCU00334	0.0932206	1	0.893857	14.3992	13.3178	Other
NCU00335	-0.348804	1	0.374169	13.7992	17.2992	Other
NCU00336	0.141532	1	0.791373	15.1917	13.5449	Other
NCU00337	0.108227	1	0.791373	14.8986	13.6693	Other
NCU00338	-0.164211	1	0.703547	14.7888	16.3513	Other
NCU00339	0.194792	1	0.707991	17.2998	14.8534	Other
NCU00340	-0.0505923	1	1	16.0659	16.3863	Other
NCU00343	-0.398347	1	0.328451	14.6526	19.0271	Other
NCU00344	0.0424213	1	1	16.2738	15.5999	Other
NCU00345	-0.0241659	1	1	15.5483	15.5387	Other
NCU00346	-0.0854299	1	0.89908	15.2301	15.9602	Other
NCU00347	0.0206753	1	1	16.5799	16.0955	Other
NCU00348	-0.0391623	1	1	17.6312	17.7426	Other
NCU00349	-0.0284903	1	1	16.5786	16.6681	Other
NCU00350	0.182999	1	0.703547	16.6874	14.4224	Other
NCU00351	-0.058356	1	1	16.2008	16.6551	Other
NCU00352	-0.12974	1	0.804324	15.5555	16.7636	Other
NCU00353	-0.250775	1	0.556015	16.6568	19.5839	Other
NCU00354	0.202548	1	0.584415	21.9158	18.9877	Other
NCU00355	-0.0863568	1	0.900657	15.5226	16.2496	Other
NCU00356	-0.0618405	1	1	15.5598	15.9396	Other
NCU00357	0.070768	1	0.902162	17.0897	15.9452	Other
NCU00358	-0.23365	1	0.602936	13.5917	15.7975	Other
NCU00359	-0.119164	1	0.794851	14.1475	15.1448	Other
NCU00360	-0.130086	1	0.801314	14.9511	16.0664	Other
NCU00361	-0.226397	1	0.614668	14.6548	16.8006	Other
NCU00362	-0.0329414	1	1	16.5393	16.7139	Other
NCU00363	0.175381	1	0.707991	17.1415	14.9361	Other
NCU00364	0.17287	1	0.698894	16.1111	14.0853	Other
NCU00365	-0.162637	1	0.694014	13.845	15.2461	Other
NCU00366	0.124621	1	0.902162	17.3564	15.6054	Other
NCU00367	0.206914	1	0.68889	15.3355	13.0618	Other
NCU00368	0.139396	1	0.794851	15.42	13.7603	Other
NCU00369	0.053158	1	1	15.5437	14.7838	Other
NCU00370	0.0485426	1	1	15.5592	14.8309	Other
NCU00371	0.0772364	1	0.893857	14.551	13.5913	Other
NCU00372	-0.102191	1	0.897426	14.7461	15.6263	Other
NCU00373	-0.0771573	1	0.89908	15.2267	15.8418	Other
NCU00375	-0.0333391	1	1	16.65	16.7246	Other
NCU00376	-0.0618123	1	0.900657	15.7322	16.1825	Other
NCU00377	-0.0150472	1	1	14.6685	14.6596	Other
NCU00378	0.241894	1	0.602936	16.0364	13.3765	Other
NCU00379	0.0866147	1	0.89908	16.2075	14.9496	Other
NCU00380	0.061675	1	1	17.652	16.5849	Other
NCU00382	-0.142167	1	0.707991	15.3179	16.6277	Other
NCU00384	-0.405086	1	0.328451	14.5646	18.9374	Other
NCU00385	-0.321989	1	0.496631	12.2009	14.9653	Other
NCU00386	-0.0820862	1	0.902162	16.4071	17.0321	Other
NCU00387	0.0227302	1	1	16.7982	16.2747	Other
NCU00388	-0.0284407	1	1	15.0669	15.1673	Other
NCU00389	0.0076974	1	1	15.9674	15.6605	Other
NCU00391	-0.285261	1	0.482808	16.715	20.0117	Other
NCU00392	0.0238121	1	1	16.6692	16.1295	Other
NCU00395	0.0648141	1	1	15.119	14.1933	Other
NCU00396	-0.0608105	1	0.89908	15.296	15.7123	Other
NCU00397	0.109983	1	0.902162	17.2555	15.7676	Other
NCU00398	-0.187039	1	0.703547	14.4408	16.2009	Other
NCU00399	-0.332285	1	0.402983	15.3438	19.0551	Other
NCU00400	-0.156359	1	0.716312	16.1763	17.7836	Other
NCU00401	0.0306386	1	1	16.3009	15.6793	Other
NCU00403	-0.0988304	1	0.906298	17.4725	18.3528	Other
NCU00404	-0.205995	1	0.614668	14.7476	16.8698	Other
NCU00405	0.181812	1	0.794851	15.8433	13.7731	Other
NCU00406	0.0447046	1	1	15.9667	15.2632	Other
NCU00407	-0.062534	1	0.89908	15.2375	15.6039	Other
NCU00408	-0.379982	1	0.288805	15.7748	20.2125	Other
NCU00409	-0.0638306	1	0.902162	16.1814	16.5909	Other
NCU00410	-0.237341	1	0.620158	15.0824	17.5198	Other
NCU00411	0.17111	1	0.716312	18.2446	15.9513	Other
NCU00412	-0.0152564	1	1	15.5934	15.4929	Other
NCU00413	0.000115785	1	1	15.8171	15.5425	Other
NCU00414	-0.142694	1	0.807202	16.23	17.6626	Other
NCU00415	-0.0574349	1	1	15.676	16.1166	Other
NCU00416	-0.157594	1	0.716312	16.1358	17.7968	Other
NCU00417	-0.0609091	1	1	15.5901	16.0263	Other
NCU00418	-0.179116	1	0.716312	16.0815	18.0054	Other
NCU00419	-0.185942	1	0.648806	18.1568	20.3639	Other
NCU00420	0.0362203	1	1	16.2462	15.5666	Other
NCU00421	0.228668	1	0.620158	17.8545	15.0255	Other
NCU00422	-0.232139	1	0.694014	13.4627	15.5933	Other
NCU00423	-0.00458254	1	1	15.5649	15.3994	Other
NCU00424	0.0547054	1	1	16.2146	15.3993	Other
NCU00425	0.3987	1	0.349698	16.1099	12.001	Other
NCU00426	0.0801493	1	0.903601	17.548	16.4253	Other
NCU00427	0.00724186	1	1	15.5123	15.2175	Other
NCU00428	0.0635492	1	1	15.3273	14.4552	Other
NCU00430	0.0421948	1	1	17.3742	16.6095	Other
NCU00431	0.129582	1	0.804324	17.1318	15.3779	Other
NCU00432	-0.116677	1	0.897426	14.3682	15.3531	Other
NCU00434	-0.0586814	1	1	16.4136	16.8652	Other
NCU00435	-0.186848	1	0.707991	15.0341	16.8962	Other
NCU00436	0.12517	1	0.79816	15.9175	14.3655	Other
NCU00437	0.26619	1	0.525789	17.1986	14.0943	Other
NCU00438	0.189002	1	0.703547	16.6468	14.3312	Other
NCU00439	-0.125486	1	0.807202	16.355	17.5221	Other
NCU00440	-0.100163	1	0.807202	16.3731	17.286	Other
NCU00441	0.0724293	1	0.904978	17.9302	16.8013	Other
NCU00442	-0.0722498	1	0.900657	15.636	16.2029	Other
NCU00443	-0.115453	1	0.801314	15.2532	16.2802	Other
NCU00444	-0.00367866	1	1	15.5994	15.4134	Other
NCU00445	0.180153	1	0.794851	15.8948	13.7628	Other
NCU00446	-0.0714639	1	1	16.4979	17.0379	Other
NCU00447	-0.0640345	1	1	15.9041	16.4022	Other
NCU00448	0.028882	1	1	15.3528	14.8091	Other
NCU00449	-0.236404	1	0.590066	12.7963	14.9744	Other
NCU00450	-0.0932934	1	0.902162	15.9043	16.7654	Other
NCU00451	-0.0412676	1	1	17.5992	17.8868	Other
NCU00453	-0.0411993	1	1	15.7029	15.8373	Other
NCU00454	0.0561767	1	1	16.0954	15.1927	Other
NCU00455	0.0906517	1	0.89908	16.1651	14.9025	Other
NCU00456	-0.506067	1	0.15393	14.8579	20.8569	Other
NCU00457	-0.18692	1	0.787713	12.8427	14.4181	Other
NCU00458	-0.167159	1	0.712242	15.5444	17.0992	Other
NCU00459	0.0485238	1	1	15.094	14.3717	Other
NCU00461	-0.0388603	1	1	16.1587	16.3206	Other
NCU00462	0.00620359	1	1	16.6583	16.2703	Other
NCU00463	0.0305149	1	1	16.6642	16.118	Other
NCU00464	-0.1636	1	0.804324	15.3749	17.0742	Other
NCU00465	-0.0403261	1	1	15.4029	15.6639	Other
NCU00466	0.149631	1	0.794851	15.6234	13.8266	Other
NCU00467	-0.133573	1	0.804324	15.4041	16.6565	Other
NCU00468	0.0202717	1	1	17.6161	17.237	Other
NCU00469	0.222364	1	0.608934	16.4804	13.8919	Other
NCU00470	0.0558379	1	1	16.0307	15.1588	Other
NCU00471	-0.0261529	1	1	17.4891	17.4856	Other
NCU00472	0.0159606	1	1	17.2592	16.8057	Other
NCU00473	-0.106382	1	0.900657	15.5092	16.5186	Other
NCU00474	0.0293321	1	1	16.3266	15.9146	Other
NCU00475	-0.0607121	1	0.902162	16.2655	16.7231	Other
NCU00476	0.115787	1	0.904978	18.3772	16.7021	Other
NCU00477	-0.227539	1	0.550429	16.3039	18.831	Other
NCU00478	-0.104787	1	0.807202	16.341	17.3307	Other
NCU00480	0.0352792	1	1	15.8823	15.2661	Other
NCU00481	-0.0388609	1	1	15.3527	15.557	Other
NCU00483	0.0779017	1	0.902162	17.0394	15.9173	Other
NCU00484	0.177862	1	0.698894	16.1842	13.9812	Other
NCU00485	-0.332816	1	0.290248	21.8541	27.1039	Other
NCU00486	-0.185816	1	0.712242	15.394	17.2262	Other
NCU00487	0.0338825	1	1	16.937	16.3105	Other
NCU00488	0.123746	1	0.804324	17.2137	15.5212	Other
NCU00489	-0.327271	1	0.416006	16.4966	20.4065	Other
NCU00490	-0.00251672	1	1	15.7995	15.6097	Other
NCU00491	-0.477013	1	0.181828	14.3382	19.7072	Other
NCU00492	-0.132229	1	0.809957	16.6658	18.0119	Other
NCU00493	-0.0684649	1	0.900657	15.831	16.3483	Other
NCU00494	-0.110171	1	0.804324	15.6549	16.6329	Other
NCU00495	-0.0241523	1	1	15.9531	15.9793	Other
NCU00496	-0.00859655	1	1	16.566	16.3771	Other
NCU00497	0.078745	1	1	16.8052	15.6472	Other
NCU00498	0.118905	1	0.809957	18.301	16.6048	Other
NCU00499	0.000645397	1	1	15.3558	15.1136	Other
NCU00500	-0.282499	1	0.470387	15.6185	18.689	Other
NCU00501	0.0576885	1	1	15.6871	14.8309	Other
NCU00502	-0.233285	1	0.596654	13.2755	15.4175	Other
NCU00503	0.0117616	1	1	14.3792	14.0395	Other
NCU00504	-0.0389983	1	1	15.7307	15.9187	Other
NCU00505	-0.154276	1	0.794851	14.1671	15.5573	Other
NCU00506	-0.360851	1	0.349203	16.2207	20.5461	Other
NCU00509	-0.399387	1	0.313521	13.615	17.768	Other
NCU00510	-0.328206	1	0.36821	17.7271	21.8794	Other
NCU00512	-0.00991986	1	1	15.662	15.5184	Other
NCU00513	-0.275467	1	0.518973	13.6521	16.1951	Other
NCU00515	-0.0793033	1	0.89908	15.0313	15.658	Other
NCU00516	-0.0504212	1	1	16.6558	16.8719	Other
NCU00517	0.0540056	1	1	15.2646	14.4916	Other
NCU00518	-0.09583	1	0.897426	14.6592	15.4176	Other
NCU00519	-0.470977	1	0.280626	11.5313	15.7496	Other
NCU00520	-0.206096	1	0.698894	13.8927	15.7744	Other
NCU00521	-0.466963	1	0.267831	13.9678	19.0927	Other
NCU00522	0.163834	1	0.707991	16.9286	14.815	Other
NCU00523	-0.173777	1	0.698894	14.3023	15.932	Other
NCU00524	-0.140212	1	0.887728	11.8785	12.8354	Other
NCU00525	-0.233606	1	0.538599	15.3012	17.7737	Other
NCU00526	0.16929	1	0.791373	15.1101	13.1747	Other
NCU00527	-0.28548	1	0.525789	13.9641	16.8378	Other
NCU00528	-0.0483393	1	1	14.6997	14.9719	Other
NCU00529	-0.23263	1	0.538599	15.4508	17.8667	Other
NCU00530	-0.245892	1	0.564164	16.826	19.6669	Other
NCU00531	-0.0696795	1	0.909951	19.2943	20.0029	Other
NCU00532	-0.265323	1	0.620158	14.859	17.612	Other
NCU00533	-0.172539	1	0.716312	16.225	17.9584	Other
NCU00534	-0.0857063	1	0.900657	15.8803	16.6549	Other
NCU00535	-0.235862	1	0.608934	14.234	16.5327	Other
NCU00536	0.00698354	1	1	15.6641	15.3584	Other
NCU00537	-0.374837	1	0.349203	16.0701	20.6793	Other
NCU00538	-0.0454519	1	1	15.7121	15.9917	Other
NCU00541	-0.284052	1	0.504418	12.7537	15.3134	Other
NCU00542	0.020081	1	1	15.3989	14.9182	Other
NCU00545	0.273192	1	0.590066	15.1296	12.3393	Other
NCU00547	0.199942	1	0.677818	14.2123	12.217	Other
NCU00548	-0.311213	1	0.525789	13.9598	17.1061	Other
NCU00549	0.0445223	1	1	16.328	15.6853	Other
NCU00550	0.0098781	1	1	14.9292	14.5626	Other
NCU00551	-0.112977	1	0.900657	15.4741	16.4799	Other
NCU00552	-0.291082	1	0.476707	16.183	19.4927	Other
NCU00553	-0.259085	1	0.518973	13.7794	16.2712	Other
NCU00554	-0.1373	1	0.804324	15.4092	16.6782	Other
NCU00556	0.127196	1	0.791373	14.8601	13.4568	Other
NCU00557	-0.160291	1	0.707991	15.1359	16.6063	Other
NCU00558	-0.0883633	1	0.897426	14.4426	15.1035	Other
NCU00559	-0.00978282	1	1	14.3284	14.1934	Other
NCU00560	-0.345214	1	0.401076	11.2874	14.1819	Other
NCU00561	-0.0342975	1	1	15.356	15.4995	Other
NCU00562	0.229913	1	0.68889	15.1956	12.7233	Other
NCU00563	-0.223577	1	0.620158	15.1446	17.3904	Other
NCU00564	-0.218376	1	0.625421	15.7032	18.0146	Other
NCU00565	-0.181121	1	0.794851	13.8781	15.5056	Other
NCU00566	0.00675842	1	1	14.2248	13.9486	Other
NCU00567	-0.212621	1	0.608934	14.3293	16.4027	Other
NCU00568	0.0196575	1	1	15.7032	15.3369	Other
NCU00569	-0.136602	1	0.801314	15.0188	16.3414	Other
NCU00570	-0.170684	1	0.707991	15.3583	17.0257	Other
NCU00571	-0.329123	1	0.457038	14.3944	17.8198	Other
NCU00572	-0.0645695	1	0.897426	14.7434	15.2105	Other
NCU00573	0.0351384	1	1	16.3263	15.6806	Other
NCU00574	-0.874041	0.165238	0.0169993	12.7691	23.1504	Other
NCU00575	-0.114212	1	0.801314	15.164	16.1921	Other
NCU00576	0.076767	1	1	16.7689	15.7186	Other
NCU00577	-0.0569212	1	1	15.9329	16.2791	Other
NCU00578	0.0331185	1	1	13.7509	13.2181	Other
NCU00579	0.0476312	1	1	15.3042	14.6005	Other
NCU00580	-0.262476	1	0.538599	14.9328	17.6527	Other
NCU00581	0.178605	1	0.703547	16.6269	14.4554	Other
NCU00582	-0.274711	1	0.538599	15.0549	17.9556	Other
NCU00583	-0.0589416	1	0.89908	15.1984	15.5884	Other
NCU00584	-0.0495155	1	1	15.5087	15.7114	Other
NCU00585	-0.119361	1	0.900657	15.4191	16.4794	Other
NCU00586	-0.259204	1	0.538599	15.2047	17.9365	Other
NCU00587	-0.218721	1	0.625421	15.4978	17.8368	Other
NCU00589	-0.137304	1	0.712242	15.8788	17.2455	Other
NCU00590	-0.137068	1	0.807202	16.0737	17.4339	Other
NCU00591	0.0392848	1	1	15.2884	14.6543	Other
NCU00592	-0.0983849	1	0.897426	14.7687	15.5617	Other
NCU00593	-0.155854	1	0.703547	14.7271	16.2115	Other
NCU00594	-0.516575	1	0.15393	14.7102	20.6943	Other
NCU00595	-0.0831896	1	0.902162	16.2199	16.8989	Other
NCU00596	-0.130189	1	0.79816	14.8537	16.0064	Other
NCU00597	-0.105959	1	0.897426	14.7344	15.6071	Other
NCU00598	-0.599011	1	0.14802	11.5368	17.236	Other
NCU00599	0.0232983	1	1	14.8934	14.4208	Other
NCU00600	-0.00691446	1	1	17.197	16.9797	Other
NCU00602	-0.00140009	1	1	14.7795	14.5331	Other
NCU00603	0.31811	1	0.396144	19.1093	15.0024	Other
NCU00604	0.0113089	1	1	15.9617	15.5933	Other
NCU00605	-0.042991	1	1	15.9265	16.1748	Other
NCU00606	-0.000368353	1	1	16.4496	16.305	Other
NCU00607	0.0211951	1	1	18.8367	18.2159	Other
NCU00608	0.260599	1	0.525789	16.8892	13.8512	Other
NCU00609	-0.302996	1	0.463836	15.1872	18.5102	Other
NCU00611	0.933644	0.0195685	0.00159685	39.4713	20.3961	Other
NCU00614	0.100486	1	0.902162	17.2411	15.835	Other
NCU00616	-0.0557614	1	1	16.9583	17.2932	Other
NCU00617	-0.0773031	1	0.893857	13.6751	14.2984	Other
NCU00618	-0.169562	1	0.716312	16.3217	18.0894	Other
NCU00619	0.0520722	1	1	15.1558	14.4326	Other
NCU00620	0.0791045	1	0.891927	14.0499	13.1137	Other
NCU00621	-0.00873128	1	1	15.2567	15.1399	Other
NCU00622	-0.019337	1	1	15.6846	15.6899	Other
NCU00623	-0.190897	1	0.707991	15.1283	17.0599	Other
NCU00624	-0.556401	1	0.168659	12.8835	18.7327	Other
NCU00627	-0.268955	1	0.532325	14.7478	17.5384	Other
NCU00628	-0.0201923	1	1	16.5093	16.4909	Other
NCU00629	0.0343402	1	1	16.1372	15.494	Other
NCU00630	-0.130988	1	0.804324	15.6118	16.7829	Other
NCU00631	-0.0286427	1	1	15.861	15.9609	Other
NCU00632	-0.160574	1	0.716312	16.0037	17.6902	Other
NCU00633	-0.174774	1	0.801314	14.9325	16.7399	Other
NCU00634	-0.0435519	1	1	17.1063	17.4207	Other
NCU00635	-0.317716	1	0.442643	13.5924	16.7032	Other
NCU00636	-0.0894547	1	0.893857	13.8431	14.4877	Other
NCU00638	-0.183986	1	0.716312	15.9054	17.8022	Other
NCU00640	0.172929	1	0.698894	16.0359	13.9451	Other
NCU00641	0.0424238	1	1	13.0796	12.6239	Other
NCU00642	-0.142455	1	0.801314	15.1666	16.5087	Other
NCU00643	0.0206504	1	1	16.4	15.8844	Other
NCU00644	0.217123	1	0.703547	16.7892	14.268	Other
NCU00645	-0.136022	1	0.804324	15.3985	16.6954	Other
NCU00646	-0.0974718	1	0.902162	16.2494	17.1733	Other
NCU00648	0.0643012	1	0.89908	15.9066	14.9346	Other
NCU00649	-0.256047	1	0.525789	14.1963	16.7757	Other
NCU00650	0.27967	1	0.518973	16.8361	13.6477	Other
NCU00651	-0.0343879	1	1	16.2043	16.345	Other
NCU00652	0.100277	1	0.897426	15.5246	14.2799	Other
NCU00653	-0.103279	1	0.804324	15.841	16.7394	Other
NCU00654	0.0961354	1	0.807202	17.4759	16.1152	Other
NCU00655	-0.146485	1	0.79816	14.5265	15.812	Other
NCU00656	0.244655	1	0.614668	17.2311	14.269	Other
NCU00657	0.340028	1	0.396144	19.37	15.0741	Other
NCU00658	0.0537059	1	1	16.1438	15.3201	Other
NCU00659	0.0185415	1	1	15.9885	15.5382	Other
NCU00660	0.338607	1	0.496631	15.1822	11.8306	Other
NCU00662	-0.0122447	1	1	16.8178	16.6994	Other
NCU00663	-0.172578	1	0.716312	16.094	17.8452	Other
NCU00664	0.2358	1	0.614668	17.1314	14.3384	Other
NCU00665	0.124929	1	0.807202	17.6609	15.9608	Other
NCU00666	-0.0853223	1	0.89908	15.1158	15.7555	Other
NCU00667	-0.411448	1	0.235117	15.3913	20.0992	Other
NCU00668	0.0536506	1	1	15.817	14.9948	Other
NCU00669	-0.0347868	1	1	14.9964	15.1704	Other
NCU00670	-0.395395	1	0.281999	15.3277	19.8662	Other
NCU00671	-0.105814	1	0.900657	15.3767	16.336	Other
NCU00673	-0.0535803	1	1	16.0926	16.4527	Other
NCU00674	0.0796787	1	0.903601	17.8032	16.6255	Other
NCU00675	0.131349	1	0.893857	14.7172	13.1969	Other
NCU00676	0.032447	1	1	12.9028	12.4411	Other
NCU00677	0.23849	1	0.532325	17.5143	14.591	Other
NCU00678	0.225288	1	0.703547	16.8776	14.2205	Other
NCU00679	0.0602541	1	0.900657	16.3763	15.4759	Other
NCU00680	0.173664	1	0.707991	17.2	15.0294	Other
NCU00681	-0.047965	1	1	14.9227	15.1981	Other
NCU00682	-0.0828085	1	0.900657	15.5684	16.2323	Other
NCU00684	-0.0719149	1	0.900657	15.589	16.0822	Other
NCU00685	-0.186455	1	0.707991	15.2381	17.0948	Other
NCU00687	-0.0749141	1	1	14.5422	15.1249	Other
NCU00688	0.0755061	1	0.900657	16.4809	15.4328	Other
NCU00689	-0.0902714	1	1	14.9183	15.6158	Other
NCU00690	-0.0238413	1	1	15.1264	15.0838	Other
NCU00691	-0.102606	1	0.900657	15.7076	16.5856	Other
NCU00692	0.132234	1	0.787713	14.3554	12.8658	Other
NCU00693	-0.00880268	1	1	12.4182	12.3738	Other
NCU00694	-0.110294	1	0.794851	14.3545	15.2348	Other
NCU00695	0.132599	1	0.794851	15.661	14.0832	Other
NCU00696	0.0826793	1	1	15.3271	14.2919	Other
NCU00697	0.0574584	1	0.903601	17.4789	16.5475	Other
NCU00698	0.183238	1	0.703547	16.7395	14.4784	Other
NCU00699	0.321013	1	0.396144	19.0325	14.9876	Other
NCU00700	0.0049176	1	1	15.6073	15.3124	Other
NCU00701	0.0510625	1	1	18.1419	17.2197	Other
NCU00704	0.308575	1	0.463836	18.8527	14.9719	Other
NCU00705	0.0191243	1	1	16.2701	15.7933	Other
NCU00706	-0.0266241	1	1	16.7157	16.7518	Other
NCU00707	0.253349	1	0.614668	17.1422	14.0897	Other
NCU00708	0.208193	1	0.625421	17.8937	15.3565	Other
NCU00709	0.227135	1	0.677818	14.0331	11.7893	Other
NCU00710	0.104856	1	0.794851	15.4191	14.0795	Other
NCU00711	0.0887744	1	0.895687	15.0357	13.8908	Other
NCU00712	0.231319	1	0.694014	15.7753	13.2462	Other
NCU00713	0.097736	1	0.895687	14.9132	13.7051	Other
NCU00714	-0.244654	1	0.608934	13.9292	16.2341	Other
NCU00715	0.00202935	1	1	17.1837	16.9071	Other
NCU00716	-0.294559	1	0.470387	15.5793	18.7336	Other
NCU00717	-0.206512	1	0.707991	14.9681	17.0056	Other
NCU00718	0.340126	1	0.381751	18.2366	14.157	Other
NCU00719	-0.341177	1	0.374169	13.7724	17.2329	Other
NCU00720	-0.121164	1	0.902162	15.9458	17.1047	Other
NCU00721	-0.117214	1	0.900657	15.5194	16.6326	Other
NCU00722	0.000879563	1	1	15.7301	15.5221	Other
NCU00723	-0.0582887	1	1	15.9558	16.3636	Other
NCU00724	0.225193	1	0.68889	15.3056	12.868	Other
NCU00725	0.038388	1	1	15.1049	14.5432	Other
NCU00726	-0.248197	1	0.532325	14.7326	17.285	Other
NCU00727	0.130687	1	0.79816	16.2986	14.6822	Other
NCU00728	-0.256216	1	0.614668	14.4121	16.916	Other
NCU00729	-0.128393	1	0.809957	16.5425	17.8412	Other
NCU00730	-0.285937	1	0.518973	13.6922	16.4518	Other
NCU00732	-0.125982	1	0.900657	15.469	16.5968	Other
NCU00733	-0.0332119	1	1	14.7477	14.9361	Other
NCU00734	-0.166477	1	0.703547	14.8368	16.4234	Other
NCU00735	-0.0759504	1	0.885437	11.7137	12.1219	Other
NCU00736	0.180137	1	0.783853	14.2461	12.3723	Other
NCU00737	0.212498	1	0.698894	16.2432	13.7513	Other
NCU00738	-0.118999	1	0.79816	14.7198	15.7422	Other
NCU00739	-0.589007	0.901121	0.124934	14.4307	21.4379	Other
NCU00740	0.00193292	1	1	16.2899	16.0192	Other
NCU00741	-0.0537239	1	1	14.2469	14.593	Other
NCU00742	-0.0226093	1	1	15.0359	15.1205	Other
NCU00743	-0.0262512	1	1	16.015	16.0604	Other
NCU00744	-0.36131	1	0.435009	12.9739	16.4608	Other
NCU00745	0.303094	1	0.476707	19.7425	15.7227	Other
NCU00746	0.179697	1	0.652779	18.9788	16.4896	Other
NCU00747	0.270094	1	0.50839	20.1551	16.5349	Other
NCU00748	-0.153375	1	0.712242	15.8471	17.3511	Other
NCU00749	-0.267092	1	0.538599	15.0389	17.7975	Other
NCU00751	-0.129493	1	0.807202	16.0478	17.2653	Other
NCU00752	0.0349042	1	1	14.8939	14.2844	Other
NCU00753	0.30909	1	0.44998	17.8454	14.1567	Other
NCU00754	-0.267567	1	0.544629	15.4576	18.2843	Other
NCU00755	0.0644218	1	1	16.2891	15.3326	Other
NCU00756	-0.0183102	1	1	15.9229	15.8392	Other
NCU00757	0.178491	1	0.712242	17.479	15.1277	Other
NCU00758	0.103387	1	0.79816	15.952	14.6051	Other
NCU00759	-0.0188375	1	1	15.8762	15.8185	Other
NCU00760	-0.185393	1	0.716312	16.0011	18.0066	Other
NCU00761	-0.03259	1	1	16.4208	16.5547	Other
NCU00762	0.0853577	1	0.89908	16.18	15.0213	Other
NCU00763	-0.0295131	1	1	15.4232	15.5266	Other
NCU00764	-0.52122	1	0.194726	15.3829	21.5393	Other
NCU00765	-0.0912534	1	0.902853	16.065	16.8918	Other
NCU00766	-0.209679	1	0.694014	13.5797	15.5059	Other
NCU00768	0.110047	1	0.895687	15.154	13.8064	Other
NCU00770	-0.149176	1	0.791373	13.7115	15.0185	Other
NCU00771	-0.126662	1	0.79816	14.7642	15.895	Other
NCU00772	0.0532767	1	1	15.6163	14.7847	Other
NCU00773	0.060742	1	1	14.461	13.6731	Other
NCU00774	-0.11039	1	0.804324	15.6643	16.6127	Other
NCU00775	0.0211009	1	1	16.0024	15.6151	Other
NCU00776	0.162606	1	0.770873	12.5827	11.056	Other
NCU00777	0.120117	1	0.783853	13.8953	12.5755	Other
NCU00778	-0.0459004	1	1	15.6855	15.9063	Other
NCU00779	0.120447	1	0.900657	16.886	15.2472	Other
NCU00780	-0.197466	1	0.703547	14.3986	16.3722	Other
NCU00781	0.14179	1	0.794851	15.4393	13.8029	Other
NCU00782	0.0136249	1	1	14.8272	14.4579	Other
NCU00783	0.135965	1	0.887728	13.0794	11.6834	Other
NCU00784	-0.100707	1	0.897426	14.5336	15.3451	Other
NCU00786	0.103237	1	0.891927	14.2974	13.1349	Other
NCU00787	0.337253	1	0.44998	17.6341	13.7545	Other
NCU00788	0.0875207	1	0.897426	15.488	14.3257	Other
NCU00789	0.0489819	1	1	15.634	14.8714	Other
NCU00790	0.109681	1	0.895687	15.3639	14.0057	Other
NCU00792	-0.239803	1	0.614668	14.4206	16.8311	Other
NCU00793	-0.105977	1	0.89908	15.176	16.1121	Other
NCU00794	0.0216929	1	1	15.4444	14.9554	Other
NCU00795	0.0674999	1	0.895687	14.9131	13.9784	Other
NCU00796	-0.0798371	1	0.897426	14.6029	15.2465	Other
NCU00797	-0.00255958	1	1	16.2484	16.0267	Other
NCU00798	0.218024	1	0.694014	15.7395	13.3268	Other
NCU00799	0.0760756	1	0.89908	15.917	14.855	Other
NCU00800	-0.0439388	1	1	15.8032	16.1113	Other
NCU00801	0.149985	1	0.698894	15.9169	14.1521	Other
NCU00802	0.100082	1	0.893857	14.5046	13.3349	Other
NCU00803	-0.0864893	1	0.89908	15.1108	15.7209	Other
NCU00804	0.0432878	1	1	20.1631	19.1368	Other
NCU00805	-0.234026	1	0.614668	14.719	17.093	Other
NCU00806	-0.22109	1	0.625421	15.7175	18.0494	Other
NCU00807	-0.00573952	1	1	19.9099	19.6716	Other
NCU00808	-0.208782	1	0.630471	15.9343	18.1128	Other
NCU00809	0.0732827	1	0.902162	16.9652	15.8729	Other
NCU00810	0.00903158	1	1	16.2128	15.8807	Other
NCU00811	0.0617549	1	1	14.1705	13.3941	Other
NCU00812	0.375469	1	0.427059	16.25	12.251	Other
NCU00813	0.116921	1	0.791373	15.0416	13.6076	Other
NCU00814	0.0827221	1	1	15.7729	14.6945	Other
NCU00817	0.136755	1	0.794851	15.486	13.8186	Other
NCU00818	-0.183481	1	0.68889	13.2717	14.8586	Other
NCU00819	0.0116271	1	1	18.1967	17.7659	Other
NCU00821	0.175773	1	0.630471	18.5764	16.2016	Other
NCU00822	-0.0337095	1	1	15.4304	15.4796	Other
NCU00823	-0.196984	1	0.698894	14.0504	15.8794	Other
NCU00824	-0.119219	1	0.89908	14.9438	16.0272	Other
NCU00825	0.113502	1	0.794851	15.412	14.0276	Other
NCU00826	0.0549159	1	1	15.1694	14.4278	Other
NCU00827	0.111144	1	0.794851	15.3677	14.0512	Other
NCU00828	-0.0550794	1	1	14.229	14.555	Other
NCU00829	0.196204	1	0.787713	14.8277	12.7127	Other
NCU00830	-0.190693	1	0.716312	16.0263	17.9736	Other
NCU00831	-0.0733576	1	1	14.3714	14.922	Other
NCU00832	-0.156387	1	0.801314	15.069	16.6061	Other
NCU00833	-0.021931	1	1	15.4468	15.4426	Other
NCU00834	0.115704	1	0.89908	16.1605	14.6809	Other
NCU00835	0.229699	1	0.538599	17.9498	15.043	Other
NCU00836	0.38085	1	0.374169	17.7986	13.4109	Other
NCU00837	0.393198	1	0.427059	16.3173	12.2839	Other
NCU00838	-0.205915	1	0.602936	13.8495	15.7515	Other
NCU00839	0.0919833	1	0.897426	15.7428	14.4668	Other
NCU00842	-0.505859	1	0.181828	14.0377	19.6879	Other
NCU00843	-0.00945484	1	1	14.8981	14.7505	Other
NCU00844	-0.242915	1	0.544629	15.6411	18.2653	Other
NCU00845	0.303998	1	0.504418	15.608	12.4713	Other
NCU00846	0.0490781	1	1	16.0543	15.2477	Other
NCU00847	0.164636	1	0.787713	14.8347	13.0861	Other
NCU00848	0.0930061	1	0.897426	15.6482	14.4439	Other
NCU00849	0.0773455	1	0.908781	19.7348	18.2914	Other
NCU00850	-0.0516753	1	0.904978	17.4113	17.7723	Other
NCU00851	-0.0368293	1	1	13.1506	13.2306	Other
NCU00852	0.451045	1	0.297612	17.0158	12.1621	Other
NCU00853	0.023277	1	1	15.6299	15.1563	Other
NCU00854	-0.0945185	1	0.897426	14.6981	15.4231	Other
NCU00855	-0.171105	1	0.703547	14.5826	16.088	Other
NCU00856	0.183037	1	0.703547	16.7074	14.4193	Other
NCU00857	0.103569	1	0.893857	14.7044	13.4397	Other
NCU00859	0.00332149	1	1	15.123	14.848	Other
NCU00860	0.0572729	1	1	16.3383	15.5022	Other
NCU00861	0.0231803	1	1	15.5552	15.0662	Other
NCU00862	-0.270916	1	0.538599	14.8704	17.7007	Other
NCU00863	0.1099	1	0.787713	14.3608	13.1078	Other
NCU00864	-0.231445	1	0.608934	14.0285	16.3359	Other
NCU00865	-0.0401113	1	1	17.0467	17.1956	Other
NCU00866	-0.422359	1	0.260454	13.7776	18.2289	Other
NCU00867	-0.276743	1	0.532325	14.494	17.3121	Other
NCU00868	-0.151051	1	0.807202	15.8859	17.3569	Other
NCU00869	-0.166326	1	0.707991	15.1391	16.6914	Other
NCU00870	-0.0762277	1	0.89908	15.2798	15.8215	Other
NCU00871	-0.163057	1	0.783853	12.7191	14.052	Other
NCU00872	-0.0127436	1	1	15.7572	15.7473	Other
NCU00873	-0.0257476	1	1	16.0108	16.0237	Other
NCU00874	-0.0424532	1	1	15.527	15.6986	Other
NCU00875	0.0939136	1	0.89908	16.3327	15.112	Other
NCU00876	0.227756	1	0.614668	17.0318	14.2842	Other
NCU00877	-0.268009	1	0.482808	16.5479	19.6869	Other
NCU00878	-0.635014	0.437452	0.0526471	16.7303	25.6847	Other
NCU00879	-0.233431	1	0.625421	15.4788	17.879	Other
NCU00880	0.0243288	1	1	14.9933	14.5827	Other
NCU00881	-0.0856406	1	0.895687	14.3692	15.0037	Other
NCU00882	-0.0010859	1	1	17.5751	17.3574	Other
NCU00883	-0.0302753	1	1	16.6473	16.6978	Other
NCU00884	-0.00137539	1	1	15.4804	15.2318	Other
NCU00885	0.0373334	1	1	15.527	14.8891	Other
NCU00886	-0.0545066	1	1	14.6015	15.0202	Other
NCU00887	-0.0169967	1	1	17.635	17.5539	Other
NCU00889	-0.0466019	1	1	15.791	16.0732	Other
NCU00890	0.193619	1	0.698894	15.9371	13.6702	Other
NCU00891	0.263814	1	0.590066	15.3517	12.5896	Other
NCU00892	0.0666122	1	1	15.1104	14.2203	Other
NCU00893	0.113652	1	0.895687	15.2909	13.9227	Other
NCU00894	0.143249	1	0.791373	15.3094	13.6448	Other
NCU00895	-0.0969364	1	0.900657	15.4462	16.2536	Other
NCU00896	-0.166326	1	0.707991	15.2477	16.8737	Other
NCU00897	0.43126	1	0.35816	16.6906	12.1744	Other
NCU00898	0.0352457	1	1	14.579	14.083	Other
NCU00899	-0.0475775	1	1	15.0022	15.2772	Other
NCU00900	-0.0595094	1	1	14.1058	14.446	Other
NCU00901	-0.120613	1	0.807202	16.0605	17.2059	Other
NCU00902	0.247418	1	0.614668	17.2797	14.2994	Other
NCU00903	-0.123081	1	0.807202	16.2008	17.4712	Other
NCU00904	-0.0662418	1	0.897426	14.8437	15.3036	Other
NCU00905	0.137753	1	0.79816	15.9551	14.2801	Other
NCU00906	0.0529548	1	1	14.7054	14.0107	Other
NCU00907	-0.0602326	1	1	15.0216	15.4234	Other
NCU00911	-0.192928	1	0.707991	15.0206	16.9674	Other
NCU00912	-0.0501902	1	1	15.3452	15.7093	Other
NCU00913	0.140639	1	0.801314	16.3772	14.6409	Other
NCU00914	-0.102193	1	0.897426	14.5734	15.4362	Other
NCU00915	-0.275936	1	0.463836	15.2245	18.2069	Other
NCU00916	-0.101184	1	0.804324	15.8044	16.6889	Other
NCU00917	0.0442816	1	1	16.0783	15.3909	Other
NCU00918	0.0279031	1	1	15.2356	14.7253	Other
NCU00919	0.10812	1	0.897426	15.4876	14.1178	Other
NCU00920	0.0455497	1	1	14.4216	13.7396	Other
NCU00921	-0.324905	1	0.457038	14.5626	18.049	Other
NCU00922	0.0848694	1	0.900657	16.5572	15.2309	Other
NCU00923	0.172967	1	0.79816	16.3605	14.2391	Other
NCU00924	0.120274	1	0.900657	16.8263	15.243	Other
NCU00925	0.227538	1	0.698894	16.2947	13.7397	Other
NCU00926	0.0764105	1	0.895687	14.8671	13.9144	Other
NCU00927	0.149413	1	0.79816	16.341	14.5017	Other
NCU00928	0.0161973	1	1	15.4586	15.0618	Other
NCU00929	0.133086	1	0.794851	15.5125	13.9043	Other
NCU00930	0.21569	1	0.698894	16.2849	13.7805	Other
NCU00931	0.0460165	1	1	15.6581	14.9349	Other
NCU00932	0.0182829	1	1	17.081	16.6557	Other
NCU00934	0.144838	1	0.716312	18.1046	15.9918	Other
NCU00935	0.0599497	1	1	14.6685	13.873	Other
NCU00936	-0.0450658	1	1	16.107	16.3518	Other
NCU00937	-0.0326424	1	1	15.6556	15.7956	Other
NCU00938	-0.183845	1	0.630471	16.2889	18.2484	Other
NCU00939	0.00225167	1	1	16.522	16.2536	Other
NCU00940	-0.340839	1	0.389071	14.6205	18.2512	Other
NCU00941	-0.0162087	1	1	15.0872	15.0205	Other
NCU00943	-0.03208	1	1	16.3237	16.5043	Other
NCU00944	0.0844158	1	1	15.8207	14.751	Other
NCU00945	0.00698881	1	1	16.0128	15.716	Other
NCU00946	-0.00709567	1	1	16.3029	16.248	Other
NCU00947	0.252339	1	0.561398	20.3741	16.8313	Other
NCU00948	-0.325539	1	0.416006	16.5812	20.5234	Other
NCU00949	-0.0204086	1	1	15.2737	15.2616	Other
NCU00950	-0.314263	1	0.511857	13.0298	15.999	Other
NCU00951	0.0715602	1	1	15.8172	14.8433	Other
NCU00952	-0.146849	1	0.801314	15.1592	16.5498	Other
NCU00953	0.253138	1	0.596654	15.5798	12.8586	Other
NCU00954	0.0152249	1	1	17.5323	17.0746	Other
NCU00955	-0.112814	1	0.807202	16.2799	17.3502	Other
NCU00956	-0.160749	1	0.712242	15.7932	17.3676	Other
NCU00957	-0.0588342	1	1	16.4816	16.8773	Other
NCU00958	0.0261965	1	1	15.3711	14.88	Other
NCU00959	0.0976345	1	0.895687	15.0463	13.8259	Other
NCU00960	-0.0549338	1	1	13.2104	13.5061	Other
NCU00961	-0.245506	1	0.625421	15.3745	17.9417	Other
NCU00962	0.199252	1	0.698894	16.2373	13.9395	Other
NCU00963	-0.277886	1	0.532325	14.3595	17.2707	Other
NCU00964	-0.190951	1	0.703547	14.3597	16.1501	Other
NCU00965	0.119115	1	0.809957	18.3464	16.6391	Other
NCU00966	0.185615	1	0.720214	18.86	16.372	Other
NCU00967	-0.0345161	1	1	15.8262	15.9685	Other
NCU00968	-0.222565	1	0.620158	15.0529	17.3604	Other
NCU00969	-0.0247699	1	1	15.7232	15.9015	Other
NCU00970	0.136827	1	0.791373	15.0473	13.4987	Other
NCU00971	-0.124187	1	0.902162	15.9057	17.1736	Other
NCU00972	0.197591	1	0.630471	18.4388	15.8413	Other
NCU00973	0.330759	1	0.442643	17.0592	13.3495	Other
NCU00974	-0.0172223	1	1	16.3286	16.2557	Other
NCU00975	0.16707	1	0.804324	17.3221	15.2045	Other
NCU00976	-0.0978644	1	0.824322	19.8102	20.8748	Other
NCU00977	0.0785552	1	0.895687	14.9851	14.015	Other
NCU00978	-0.00149889	1	1	16.5991	16.435	Other
NCU00979	-0.22726	1	0.635322	16.5463	19.1451	Other
NCU00980	-0.294225	1	0.518973	13.8	16.7642	Other
NCU00981	0.169385	1	0.712242	17.8012	15.5578	Other
NCU00983	-0.131155	1	0.809957	16.447	17.7842	Other
NCU00984	0.0484288	1	1	19.3375	18.467	Other
NCU00985	0.367245	1	0.342492	20.2506	15.3905	Other
NCU00986	0.166316	1	0.668322	22.5112	19.7446	Other
NCU00987	0.0921254	1	0.908781	19.8404	18.3645	Other
NCU00988	0.450245	1	0.260454	18.6868	13.4432	Other
NCU00989	0.0200371	1	1	18.5561	17.9532	Other
NCU00990	0.0388159	1	1	17.1253	16.4137	Other
NCU00992	0.0441666	1	0.908781	19.4561	18.6251	Other
NCU00993	0.136408	1	0.704451	26.1509	23.6273	Other
NCU00994	-0.112804	1	0.737129	28.9023	31.0288	Other
NCU00995	-0.469545	1	0.159599	21.5809	29.681	Other
NCU00998	-0.0156718	1	1	15.6183	15.5525	Other
NCU00999	0.184503	1	0.791373	15.4232	13.2445	Other
NCU01000	0.109255	1	0.794851	15.542	14.237	Other
NCU01001	-0.0761694	1	0.891927	13.1511	13.6665	Other
NCU01002	0.0754952	1	0.895687	14.8661	13.8516	Other
NCU01003	-0.314101	1	0.457038	14.5912	17.7744	Other
NCU01004	-0.0830014	1	1	13.8956	14.4847	Other
NCU01005	0.125079	1	0.804324	16.9111	15.259	Other
NCU01006	0.0263876	1	1	15.3814	14.8571	Other
NCU01007	0.095301	1	0.893857	14.645	13.427	Other
NCU01008	0.132698	1	0.727559	19.5751	17.5309	Other
NCU01009	0.0047729	1	1	16.196	15.8667	Other
NCU01010	0.0106525	1	1	15.8284	15.4845	Other
NCU01011	0.266459	1	0.602936	16.0575	13.0124	Other
NCU01012	0.0215469	1	1	15.188	14.6957	Other
NCU01013	-0.0695084	1	0.89908	15.1518	15.6929	Other
NCU01014	0.350351	1	0.427059	16.1144	12.4253	Other
NCU01015	0.0266655	1	1	14.2948	13.7839	Other
NCU01016	-0.156574	1	0.707991	15.3472	16.9003	Other
NCU01017	-0.0887681	1	0.903601	16.6762	17.5505	Other
NCU01019	0.145121	1	0.794851	15.8104	14.0882	Other
NCU01021	0.144586	1	0.783853	14.1447	12.5961	Other
NCU01022	0.137434	1	0.791373	14.8679	13.3734	Other
NCU01023	0.0937653	1	0.900657	16.6664	15.2653	Other
NCU01024	0.14312	1	0.791373	15.2857	13.587	Other
NCU01025	0.247238	1	0.602936	16.2854	13.6202	Other
NCU01026	0.0336433	1	1	15.1462	14.6059	Other
NCU01027	0.173894	1	0.794851	15.6365	13.6089	Other
NCU01032	-0.228298	1	0.602936	13.6854	15.735	Other
NCU01033	0.106329	1	0.891927	13.9281	12.7318	Other
NCU01034	-0.54502	0.901121	0.124934	14.8647	21.343	Other
NCU01036	-0.021776	1	1	14.7642	14.7678	Other
NCU01038	0.124856	1	0.897426	15.7476	14.2605	Other
NCU01039	-0.0919712	1	0.900657	15.4879	16.3037	Other
NCU01041	0.0102734	1	1	15.8868	15.5071	Other
NCU01042	0.136501	1	0.79816	16.2254	14.4816	Other
NCU01043	-0.205485	1	0.608934	14.3411	16.3396	Other
NCU01044	0.106696	1	0.89908	16.2427	14.8353	Other
NCU01045	-0.443235	1	0.349698	11.8586	15.9531	Other
NCU01047	0.279021	1	0.518973	16.6286	13.5261	Other
NCU01048	0.129386	1	0.895687	15.3013	13.77	Other
NCU01049	0.230876	1	0.590066	15.0424	12.6336	Other
NCU01050	0.139889	1	0.79816	16.1424	14.422	Other
NCU01051	0.0702249	1	1	16.7969	15.7466	Other
NCU01052	0.197739	1	0.703547	16.6226	14.3022	Other
NCU01053	0.0427237	1	1	14.7384	14.0345	Other
NCU01054	0.0477703	1	1	17.5978	16.6444	Other
NCU01055	-0.15993	1	0.794851	13.8762	15.2804	Other
NCU01056	0.0111651	1	1	14.8986	14.548	Other
NCU01057	0.0751811	1	1	14.72	13.7956	Other
NCU01058	-0.137563	1	0.801314	14.8944	16.1648	Other
NCU01059	0.0921848	1	0.895687	15.1081	13.9527	Other
NCU01060	-0.481253	1	0.170937	18.0825	24.8358	Other
NCU01061	-0.322168	1	0.355721	16.8394	20.7355	Other
NCU01063	0.141205	1	0.812596	18.7482	16.6468	Other
NCU01064	-0.244799	1	0.538599	15.2652	17.7752	Other
NCU01065	0.217225	1	0.620158	17.591	14.9267	Other
NCU01066	-0.132608	1	0.794851	14.2839	15.4589	Other
NCU01067	-0.147486	1	0.794851	14.2763	15.6003	Other
NCU01068	-0.0309563	1	1	15.6851	15.8067	Other
NCU01069	-0.290775	1	0.44998	14.2327	17.1517	Other
NCU01070	-0.269642	1	0.463836	15.2994	18.2211	Other
NCU01071	-0.131083	1	0.891927	13.0685	14.2136	Other
NCU01072	-0.259211	1	0.614668	14.3892	17.0255	Other
NCU01073	-0.187217	1	0.703547	14.6058	16.3779	Other
NCU01074	-0.393017	1	0.335578	15.0744	19.5654	Other
NCU01075	-0.273179	1	0.470387	15.736	18.6659	Other
NCU01076	0.0724414	1	0.893857	14.5133	13.6277	Other
NCU01077	-0.144163	1	0.891927	12.8918	14.0307	Other
NCU01078	-0.149171	1	0.707991	15.3608	16.7545	Other
NCU01079	-0.328628	1	0.389071	14.8061	18.3905	Other
NCU01080	-0.0145065	1	1	11.6905	11.6395	Other
NCU01081	-0.0710705	1	0.903601	16.5658	17.1437	Other
NCU01082	-0.159682	1	0.783853	12.4466	13.7299	Other
NCU01083	-0.0414393	1	1	13.8084	13.965	Other
NCU01084	0.106693	1	0.794851	15.4389	14.1336	Other
NCU01085	0.0719736	1	1	14.7472	13.8107	Other
NCU01086	0.186666	1	0.698894	16.0433	13.9304	Other
NCU01087	0.120898	1	0.895687	15.1274	13.7789	Other
NCU01088	0.00734021	1	1	15.5418	15.2464	Other
NCU01089	0.209721	1	0.620158	17.5841	14.9704	Other
NCU01090	-0.170424	1	0.703547	14.5953	16.1689	Other
NCU01091	-0.176027	1	0.703547	14.8632	16.5855	Other
NCU01092	-0.136869	1	0.79816	14.5451	15.7523	Other
NCU01093	-0.137431	1	0.747872	19.2649	20.9453	Other
NCU01094	0.0366719	1	1	14.2835	13.6651	Other
NCU01095	0.172028	1	0.703547	16.4308	14.3044	Other
NCU01096	-0.0164851	1	1	16.1582	16.1317	Other
NCU01097	-0.0769215	1	1	14.0207	14.6141	Other
NCU01098	0.0382361	1	1	14.2957	13.69	Other
NCU01099	0.0481667	1	1	13.5924	12.9354	Other
NCU01100	-0.0896071	1	0.891927	13.3885	14.017	Other
NCU01101	0.1026	1	0.900657	16.6902	15.2605	Other
NCU01102	0.166149	1	0.791373	15.0193	13.1434	Other
NCU01103	-0.40293	1	0.301894	16.3801	21.5102	Other
NCU01104	0.24873	1	0.596654	15.5485	12.8684	Other
NCU01105	0.111907	1	0.897426	15.8072	14.4007	Other
NCU01106	-0.137958	1	0.804324	15.5658	16.7934	Other
NCU01107	-0.119206	1	0.897426	14.5469	15.5006	Other
NCU01108	-0.00108905	1	1	15.6859	15.356	Other
NCU01109	0.0498448	1	1	18.3381	17.4211	Other
NCU01111	0.118707	1	0.791373	14.8588	13.5425	Other
NCU01112	-0.331837	1	0.44998	13.9185	17.2093	Other
NCU01113	-0.169252	1	0.716312	15.97	17.733	Other
NCU01114	-0.0721829	1	1	15.9233	16.4527	Other
NCU01115	-0.0918714	1	0.900657	15.7161	16.5759	Other
NCU01116	-0.125734	1	0.897426	14.3661	15.4636	Other
NCU01118	-0.0539379	1	1	15.5324	15.8925	Other
NCU01119	-0.00140429	1	1	15.3971	15.228	Other
NCU01120	0.215625	1	0.608934	16.5061	13.9823	Other
NCU01121	0.0670156	1	1	16.8512	15.8219	Other
NCU01122	-0.0244147	1	1	14.829	14.8624	Other
NCU01123	-0.0493238	1	1	13.2916	13.6141	Other
NCU01124	-0.0643981	1	1	16.4842	16.9928	Other
NCU01127	-0.277977	1	0.434064	18.1984	21.6967	Other
NCU01132	-0.0291079	1	1	14.9318	14.979	Other
NCU01134	0.123443	1	0.787713	14.4179	13.0325	Other
NCU01135	-0.201259	1	0.698894	13.9887	15.8397	Other
NCU01136	-0.409179	1	0.313521	13.5956	17.785	Other
NCU01138	-0.0749359	1	0.900657	15.7727	16.3449	Other
NCU01140	-0.0287043	1	1	16.2036	16.2572	Other
NCU01141	-0.0815861	1	0.897426	14.6447	15.215	Other
NCU01142	0.0172411	1	1	15.8802	15.3224	Other
NCU01143	0.148568	1	0.791373	15.0626	13.3653	Other
NCU01144	0.323418	1	0.41877	15.3725	12.1391	Other
NCU01145	-0.192136	1	0.703547	14.3755	16.2125	Other
NCU01146	-0.0929755	1	0.897426	14.794	15.5556	Other
NCU01147	-0.066954	1	1	16.0752	16.6435	Other
NCU01148	-0.112668	1	0.804324	15.7754	16.8279	Other
NCU01149	-0.26706	1	0.511857	13.2873	15.7294	Other
NCU01150	0.083141	1	0.895687	15.0413	14.0285	Other
NCU01151	0.0572922	1	1	15.8227	14.9731	Other
NCU01153	-0.0430416	1	1	17.6222	17.9321	Other
NCU01154	-0.00653888	1	1	15.4626	15.2455	Other
NCU01156	0.068192	1	1	14.5454	13.6815	Other
NCU01157	0.11085	1	0.801314	16.4123	14.9112	Other
NCU01158	0.0517564	1	0.897426	15.3769	14.6239	Other
NCU01159	0.205945	1	0.648806	20.6759	17.6576	Other
NCU01160	-0.183274	1	0.620158	15.4489	17.2263	Other
NCU01161	-0.0271151	1	1	14.5079	14.54	Other
NCU01162	0.0139147	1	1	16.9248	16.5134	Other
NCU01163	0.227001	1	0.625421	18.1205	15.2319	Other
NCU01164	0.0354307	1	1	15.7381	15.1447	Other
NCU01165	-0.00353431	1	1	16.3415	16.0996	Other
NCU01166	0.0540503	1	1	16.7227	15.8485	Other
NCU01167	-0.0156797	1	1	14.1498	14.02	Other
NCU01169	-0.274673	1	0.525789	14.3307	17.1512	Other
NCU01170	0.0616293	1	1	16.7562	15.7807	Other
NCU01171	0.137379	1	0.801314	16.5569	14.8322	Other
NCU01172	0.057851	1	1	14.4746	13.6841	Other
NCU01173	0.29793	1	0.4096	19.9973	16.0291	Other
NCU01174	0.187524	1	0.703547	16.8727	14.6042	Other
NCU01175	-0.452676	1	0.260454	13.5503	18.2933	Other
NCU01176	0.12985	1	0.89908	16.365	14.712	Other
NCU01177	0.0166753	1	1	15.3524	14.9291	Other
NCU01178	-0.0273436	1	1	14.7274	14.7775	Other
NCU01179	-0.214367	1	0.620158	15.1844	17.3486	Other
NCU01180	-0.240056	1	0.556015	16.5673	19.311	Other
NCU01181	-0.0227521	1	1	17.3291	17.3517	Other
NCU01182	0.0671373	1	1	14.672	13.7386	Other
NCU01183	-0.131625	1	0.807202	16.148	17.3763	Other
NCU01184	0.382997	1	0.366311	16.888	12.8174	Other
NCU01185	0.421971	1	0.35816	16.7401	12.3172	Other
NCU01186	0.300802	1	0.518973	16.6881	13.3252	Other
NCU01187	-0.160114	1	0.79816	14.398	15.8538	Other
NCU01188	-0.150562	1	0.787713	13.1117	14.3488	Other
NCU01189	-0.210137	1	0.614668	14.7187	16.8209	Other
NCU01190	0.162872	1	0.787713	14.457	12.6717	Other
NCU01191	-0.164207	1	0.694014	13.8063	15.2555	Other
NCU01192	0.140426	1	0.801314	16.4548	14.7406	Other
NCU01193	0.13077	1	0.716312	17.9689	16.1635	Other
NCU01195	0.222951	1	0.608934	16.6133	14.0744	Other
NCU01196	0.0588782	1	0.89908	15.8991	15.0159	Other
NCU01197	0.0904819	1	0.897426	15.7186	14.5724	Other
NCU01198	-0.0378115	1	1	15.7088	15.8478	Other
NCU01199	0.00503278	1	1	15.8805	15.5676	Other
NCU01200	-0.236219	1	0.482808	16.8751	19.5743	Other
NCU01201	-0.0493865	1	1	15.9306	16.3332	Other
NCU01202	-0.535556	1	0.168659	13.2608	19.0109	Other
NCU01203	-0.117788	1	0.815129	17.5299	18.72	Other
NCU01204	0.0707651	1	1	16.2571	15.1975	Other
NCU01205	-0.253303	1	0.544629	15.6346	18.4159	Other
NCU01206	0.0180051	1	1	16.6862	16.2221	Other
NCU01207	-0.0524908	1	1	15.4606	15.7996	Other
NCU01208	0.00170669	1	1	16.7116	16.4541	Other
NCU01209	0.070243	1	0.902162	17.0463	15.9904	Other
NCU01210	0.128932	1	0.895687	15.1654	13.6086	Other
NCU01211	-0.150849	1	0.707991	15.2476	16.7012	Other
NCU01212	-0.10187	1	0.907565	17.9278	18.9377	Other
NCU01213	-0.25279	1	0.532325	14.7944	17.408	Other
NCU01214	-0.139316	1	0.712242	15.8725	17.2126	Other
NCU01215	-0.140157	1	0.801314	15.0798	16.5814	Other
NCU01216	-0.131943	1	0.804324	15.8434	17.1423	Other
NCU01218	-0.290062	1	0.525789	13.8964	16.7718	Other
NCU01219	-0.0564311	1	0.907565	18.412	18.9162	Other
NCU01220	-0.211099	1	0.620158	15.3387	17.486	Other
NCU01221	-0.259909	1	0.614668	14.3766	17.0175	Other
NCU01223	0.284614	1	0.590066	15.1435	12.1473	Other
NCU01224	-0.101488	1	0.89908	15.1415	16.0256	Other
NCU01225	-0.000927813	1	1	16.5495	16.3754	Other
NCU01227	0.023296	1	1	16.0118	15.5734	Other
NCU01229	-0.109603	1	0.804324	15.8832	16.8503	Other
NCU01230	0.140422	1	0.804324	17.0119	15.3156	Other
NCU01231	-0.0441182	1	1	16.3864	16.657	Other
NCU01233	-0.232019	1	0.625421	15.3634	17.8513	Other
NCU01234	-0.207525	1	0.614668	14.5963	16.6308	Other
NCU01235	-0.0817932	1	0.906298	17.5954	18.2982	Other
NCU01236	-0.178212	1	0.707991	15.2255	17.0098	Other
NCU01238	-0.0911616	1	0.900657	15.3841	16.1752	Other
NCU01240	-0.0695028	1	0.897426	14.7304	15.2235	Other
NCU01241	-0.15194	1	0.804324	15.4449	16.9672	Other
NCU01242	-0.295645	1	0.532325	14.506	17.5487	Other
NCU01243	0.0627095	1	1	14.7052	13.9027	Other
NCU01245	0.085842	1	0.897426	15.7489	14.6596	Other
NCU01246	-0.439526	1	0.27501	14.5766	19.4564	Other
NCU01247	0.311844	1	0.511857	16.2438	12.9089	Other
NCU01248	0.161669	1	0.79816	16.1375	14.2163	Other
NCU01249	-0.0228963	1	1	15.1659	15.2067	Other
NCU01250	-0.18796	1	0.707991	15.2431	17.07	Other
NCU01252	-0.136467	1	0.807202	16.1288	17.4773	Other
NCU01253	0.0052185	1	1	15.1077	14.8683	Other
NCU01254	0.0706023	1	0.891927	13.9658	13.1579	Other
NCU01255	0.0576075	1	1	14.0888	13.3641	Other
NCU01256	-0.0411331	1	1	16.0154	16.2627	Other
NCU01257	-0.0367345	1	1	15.6817	15.8417	Other
NCU01258	-0.0212754	1	1	17.498	17.505	Other
NCU01259	-0.0842365	1	0.902162	15.9745	16.6952	Other
NCU01260	-0.0257644	1	1	16.1786	16.2379	Other
NCU01261	-0.0270138	1	1	15.8926	16.0575	Other
NCU01262	-0.535833	1	0.15393	14.3705	20.5107	Other
NCU01266	0.0338304	1	1	16.5078	15.8833	Other
NCU01267	0.0808709	1	1	16.277	15.2176	Other
NCU01268	-0.355484	1	0.335578	15.2111	19.1887	Other
NCU01269	-0.0295801	1	1	14.8359	14.929	Other
NCU01270	-0.115522	1	0.897426	14.401	15.3565	Other
NCU01271	-0.0998921	1	0.895687	14.3409	15.0797	Other
NCU01272	-0.482376	1	0.252872	13.0505	17.9333	Other
NCU01273	-0.0412844	1	1	16.842	17.1072	Other
NCU01274	-0.168703	1	0.801314	15.011	16.673	Other
NCU01275	0.0355854	1	1	14.3085	13.7978	Other
NCU01276	-0.356325	1	0.435009	13.0851	16.5145	Other
NCU01277	-0.171531	1	0.787713	12.9769	14.4148	Other
NCU01278	0.0642772	1	0.897426	15.5298	14.5983	Other
NCU01279	-0.144508	1	0.79816	14.7064	15.9859	Other
NCU01281	-0.238969	1	0.544629	15.8613	18.2535	Other
NCU01282	-0.336856	1	0.435009	13.1913	16.3888	Other
NCU01283	-0.00952387	1	1	14.0301	13.9194	Other
NCU01284	0.234023	1	0.683499	14.8873	12.4354	Other
NCU01285	-0.133658	1	0.791373	13.6153	14.7408	Other
NCU01288	0.0113237	1	1	14.8003	14.4405	Other
NCU01289	0.0360535	1	1	16.4112	15.7801	Other
NCU01290	0.0312019	1	1	15.5443	14.9754	Other
NCU01291	-0.0548601	1	1	14.6457	14.9875	Other
NCU01292	-0.453389	1	0.267831	14.0138	18.837	Other
NCU01294	-0.232743	1	0.614668	14.4444	16.7431	Other
NCU01296	-0.162445	1	0.707991	15.1741	16.7831	Other
NCU01297	-0.162538	1	0.804324	15.3596	16.9373	Other
NCU01298	-0.151455	1	0.804324	15.3402	16.8446	Other
NCU01299	-0.0842635	1	0.903601	16.4941	17.1574	Other
NCU01300	-0.175838	1	0.707991	14.9601	16.6051	Other
NCU01301	-0.302737	1	0.518973	13.4351	16.3767	Other
NCU01302	-0.0564494	1	1	15.9966	16.3332	Other
NCU01303	-0.0484334	1	1	15.088	15.3495	Other
NCU01304	-0.130669	1	0.779775	12.2953	13.2214	Other
NCU01305	-0.187796	1	0.625421	15.8741	17.817	Other
NCU01306	-0.202937	1	0.625421	15.6383	17.6936	Other
NCU01307	-0.267693	1	0.608934	13.9904	16.5763	Other
NCU01308	-0.22056	1	0.614668	14.587	16.7725	Other
NCU01309	-0.107044	1	0.89908	15.149	16.1114	Other
NCU01310	-0.198075	1	0.703547	14.4777	16.3314	Other
NCU01311	0.0617964	1	1	14.3358	13.5524	Other
NCU01312	-0.256373	1	0.518973	13.7888	16.1912	Other
NCU01313	-0.501546	1	0.237063	12.1413	16.9626	Other
NCU01314	-0.518617	0.961015	0.135403	15.6543	22.0374	Other
NCU01315	0.0731614	1	1	14.7594	13.806	Other
NCU01317	-0.0598051	1	0.900657	15.8185	16.2736	Other
NCU01318	-0.0366266	1	1	14.8902	15.0177	Other
NCU01319	-0.287147	1	0.538599	14.9208	17.9225	Other
NCU01320	-0.174438	1	0.639988	17.2481	19.2112	Other
NCU01321	-0.00843152	1	1	14.9113	14.7354	Other
NCU01322	-0.0255364	1	1	13.951	13.9866	Other
NCU01323	-0.173919	1	0.694014	13.7765	15.2952	Other
NCU01324	-0.347977	1	0.435009	12.8841	16.1651	Other
NCU01325	-0.209858	1	0.694014	13.6019	15.6131	Other
NCU01326	-0.188459	1	0.720214	16.6066	18.5901	Other
NCU01327	-0.123632	1	0.787713	13.3317	14.3316	Other
NCU01328	-0.0492736	1	1	13.5749	13.8393	Other
NCU01329	0.102454	1	0.794851	15.4194	14.1364	Other
NCU01330	-0.127148	1	0.895687	13.9374	15.0143	Other
NCU01331	-0.277704	1	0.463836	15.2435	18.2809	Other
NCU01332	-0.422746	1	0.27501	14.6442	19.3269	Other
NCU01333	-0.0514413	1	1	14.7079	15.0144	Other
NCU01334	-0.130327	1	0.895687	13.9674	15.0373	Other
NCU01335	-0.120891	1	0.794851	14.1612	15.2233	Other
NCU01336	0.00328154	1	1	15.937	15.6547	Other
NCU01337	0.026215	1	1	14.9793	14.4999	Other
NCU01338	0.12173	1	0.895687	15.2456	13.7926	Other
NCU01339	0.121288	1	0.89908	16.2583	14.7021	Other
NCU01340	0.251737	1	0.544629	18.5022	15.2182	Other
NCU01341	-0.0144694	1	1	14.6016	14.5151	Other
NCU01342	-0.107989	1	0.807202	16.2054	17.2609	Other
NCU01343	-0.323738	1	0.435009	13.2132	16.3641	Other
NCU01344	-0.0154431	1	1	12.6647	12.6029	Other
NCU01345	-0.113101	1	0.897426	14.6263	15.6018	Other
NCU01346	-0.471437	1	0.252872	12.9775	17.7241	Other
NCU01347	-0.340758	1	0.442643	13.631	17.0349	Other
NCU01348	-0.0521867	1	1	15.2839	15.5688	Other
NCU01349	-0.07368	1	1	13.9529	14.4729	Other
NCU01350	-0.369479	1	0.374169	13.7873	17.4901	Other
NCU01351	0.25878	1	0.677818	14.3412	11.7572	Other
NCU01353	-0.055076	1	1	14.0824	14.4666	Other
NCU01355	0.155443	1	0.698894	15.8797	13.9787	Other
NCU01356	-0.0246589	1	1	11.7021	11.7803	Other
NCU01357	-0.246004	1	0.550429	15.9673	18.6714	Other
NCU01358	0.0669238	1	1	14.0287	13.1678	Other
NCU01360	-0.364381	1	0.381751	14.1625	17.9273	Other
NCU01361	-0.0409779	1	1	13.6496	13.7875	Other
NCU01362	-0.0895913	1	1	14.0081	14.7124	Other
NCU01364	-0.0463946	1	1	15.8165	16.098	Other
NCU01365	-0.0846305	1	0.897426	14.639	15.3088	Other
NCU01366	-0.189626	1	0.707991	15.1533	16.9993	Other
NCU01367	-0.208662	1	0.68889	13.1451	14.9768	Other
NCU01368	-0.0370632	1	1	15.6893	15.8477	Other
NCU01369	-0.0375218	1	1	13.364	13.4774	Other
NCU01370	0.084126	1	0.893857	14.48	13.4012	Other
NCU01371	-0.182419	1	0.698894	14.2094	15.9322	Other
NCU01373	0.181847	1	0.787713	14.5975	12.6729	Other
NCU01374	-0.0246728	1	1	17.5121	17.459	Other
NCU01375	-0.751659	0.305884	0.0344237	13.8198	23.0088	Other
NCU01376	-0.147877	1	0.791373	13.5171	14.8264	Other
NCU01377	0.0586787	1	1	14.1823	13.4668	Other
NCU01378	0.054729	1	1	14.8325	14.0487	Other
NCU01379	-0.104053	1	0.794851	14.348	15.1908	Other
NCU01380	0.153423	1	0.787713	14.674	13.0271	Other
NCU01381	-0.0797356	1	0.89908	15.343	15.8909	Other
NCU01382	-0.277674	1	0.532325	14.4876	17.3245	Other
NCU01383	-0.385212	1	0.35816	12.8456	16.6726	Other
NCU01385	-0.12731	1	0.804324	15.6807	16.7289	Other
NCU01386	-0.0389055	1	1	15.008	15.1422	Other
NCU01387	-0.265375	1	0.602936	13.5197	16.022	Other
NCU01388	-0.107341	1	0.89908	15.2149	16.1505	Other
NCU01389	0.0482482	1	1	14.2208	13.5551	Other
NCU01390	-0.108053	1	0.897426	14.5904	15.5448	Other
NCU01391	-0.494813	1	0.175303	13.7527	19.2279	Other
NCU01392	-0.0407339	1	1	16.3622	16.4922	Other
NCU01393	0.0171332	1	1	14.561	14.1878	Other
NCU01394	0.105822	1	0.893857	14.7099	13.4688	Other
NCU01395	-0.041015	1	1	14.9421	15.138	Other
NCU01396	-0.53484	1	0.175303	13.5833	19.3744	Other
NCU01397	-0.158071	1	0.791373	13.7381	15.1558	Other
NCU01398	-0.409135	1	0.313521	13.8253	18.186	Other
NCU01399	-0.254786	1	0.614668	14.4294	16.9184	Other
NCU01400	-0.217982	1	0.625421	15.6124	17.9285	Other
NCU01401	-0.402373	1	0.35816	12.7535	16.6733	Other
NCU01402	0.12332	1	0.887728	13.2983	12.0594	Other
NCU01403	0.0386075	1	1	14.7706	14.1653	Other
NCU01404	-0.0450925	1	1	13.4838	13.7093	Other
NCU01407	-0.104599	1	0.891927	13.2732	14.0124	Other
NCU01408	0.00587425	1	1	15.723	15.3919	Other
NCU01409	-0.0128	1	1	15.2336	15.1331	Other
NCU01410	0.101585	1	0.897426	15.8287	14.5204	Other
NCU01411	-0.208862	1	0.614668	14.7059	16.803	Other
NCU01412	-0.183744	1	0.791373	13.5304	15.1815	Other
NCU01413	-0.255878	1	0.596654	12.9347	15.2807	Other
NCU01414	0.0143833	1	1	14.2515	13.9107	Other
NCU01415	-0.718366	0.360951	0.0413999	13.3506	21.7043	Other
NCU01416	-0.295118	1	0.44998	14.3111	17.297	Other
NCU01417	-0.273229	1	0.538599	15.2171	18.1962	Other
NCU01418	-0.121591	1	0.809957	16.5117	17.7269	Other
NCU01419	-0.116589	1	0.79816	14.7961	15.8373	Other
NCU01420	-0.246202	1	0.602936	13.8	16.1943	Other
NCU01421	0.0774631	1	0.897426	15.4166	14.392	Other
NCU01422	-0.449615	1	0.27501	14.4337	19.4198	Other
NCU01423	-0.433732	1	0.252872	13.3482	17.8699	Other
NCU01424	-0.0179294	1	1	16.8748	16.8351	Other
NCU01425	-0.230735	1	0.620158	14.9557	17.2758	Other
NCU01426	-0.174264	1	0.707991	15.2912	16.9893	Other
NCU01427	-0.363402	1	0.41877	12.1426	15.3501	Other
NCU01428	-0.078461	1	0.900657	15.7892	16.4727	Other
NCU01429	-0.0814671	1	0.897426	14.5239	15.2421	Other
NCU01430	0.0253449	1	1	16.1143	15.6584	Other
NCU01431	-0.058528	1	1	14.7361	15.1075	Other
NCU01432	-0.16687	1	0.807202	15.8511	17.5743	Other
NCU01433	0.0516415	1	0.902162	16.9226	16.1015	Other
NCU01434	0.0486752	1	1	15.3301	14.5252	Other
NCU01435	0.206383	1	0.707991	17.1449	14.6145	Other
NCU01436	0.151687	1	0.707991	16.9314	14.9681	Other
NCU01438	-0.24854	1	0.620158	14.9761	17.5947	Other
NCU01439	-0.143752	1	0.801314	15.2213	16.589	Other
NCU01440	-0.0611268	1	0.900657	15.7806	16.2703	Other
NCU01441	-0.29394	1	0.4096	16.2783	19.6794	Other
NCU01442	-0.312274	1	0.402983	15.8565	19.3914	Other
NCU01443	-0.126349	1	0.807202	16.0044	17.205	Other
NCU01444	-0.151218	1	0.72396	17.0676	18.6782	Other
NCU01445	0.0549463	1	1	16.6987	15.8296	Other
NCU01446	-0.114522	1	0.897426	14.4297	15.4338	Other
NCU01447	-0.112654	1	0.900657	15.4363	16.4381	Other
NCU01448	0.032782	1	1	17.7913	17.1737	Other
NCU01449	-0.016528	1	1	16.0982	16.0357	Other
NCU01450	-0.212808	1	0.625421	15.6688	17.8842	Other
NCU01451	-0.249439	1	0.538599	15.219	17.8423	Other
NCU01452	0.0370438	1	1	15.2644	14.6569	Other
NCU01453	-0.308883	1	0.518973	13.4919	16.551	Other
NCU01454	0.108755	1	0.906298	18.8201	17.23	Other
NCU01455	0.127255	1	0.889887	13.6746	12.3458	Other
NCU01456	-0.136869	1	0.720214	16.7913	18.1741	Other
NCU01457	0.0591312	1	1	15.1089	14.2858	Other
NCU01458	-0.0349128	1	1	14.8632	15.1089	Other
NCU01459	0.121522	1	0.804324	17.2066	15.5681	Other
NCU01460	-0.16902	1	0.79816	14.508	16.0636	Other
NCU01461	-0.035034	1	1	14.5227	14.6859	Other
NCU01462	-0.150385	1	0.79816	14.7546	16.1229	Other
NCU01463	-0.117444	1	0.807202	16.1613	17.2885	Other
NCU01464	-0.330564	1	0.457038	14.501	18.0333	Other
NCU01465	0.0761245	1	0.89908	15.9161	14.9033	Other
NCU01466	0.0657033	1	1	14.0094	13.2022	Other
NCU01467	-0.212369	1	0.596654	13.351	15.2675	Other
NCU01468	0.291154	1	0.518973	16.6076	13.402	Other
NCU01469	0.199989	1	0.703547	16.5278	14.1316	Other
NCU01470	0.00701965	1	1	15.7617	15.4628	Other
NCU01471	0.0103	1	1	16.6213	16.2745	Other
NCU01472	-0.0593797	1	1	15.0376	15.4872	Other
NCU01473	-0.149044	1	0.794851	13.8809	15.2249	Other
NCU01474	-0.0792789	1	1	15.9047	16.6023	Other
NCU01475	-0.110972	1	0.79816	14.8201	15.8622	Other
NCU01476	0.104841	1	0.807202	17.5065	16.0587	Other
NCU01477	0.0512282	1	1	16.6094	15.7611	Other
NCU01478	-0.088617	1	0.903601	16.791	17.6015	Other
NCU01479	0.0217032	1	1	16.04	15.5339	Other
NCU01480	0.059249	1	1	14.5581	13.722	Other
NCU01481	-0.00877349	1	1	16.3971	16.282	Other
NCU01483	-0.0406428	1	1	18.3117	18.5572	Other
NCU01484	0.112561	1	0.804324	17.0758	15.552	Other
NCU01485	-0.239982	1	0.590066	12.5865	14.6508	Other
NCU01486	0.0118454	1	1	15.6485	15.2503	Other
NCU01487	-0.31637	1	0.4096	16.2837	19.9512	Other
NCU01488	-0.144935	1	0.72396	17.3107	18.8395	Other
NCU01489	-0.142568	1	0.787713	13.132	14.3684	Other
NCU01490	0.0971433	1	0.807202	17.4543	16.0563	Other
NCU01491	-0.10099	1	0.902162	16.1402	17.055	Other
NCU01493	0.161149	1	0.801314	16.6566	14.6099	Other
NCU01494	-0.0235977	1	1	14.9191	14.9226	Other
NCU01495	0.295252	1	0.504418	15.5006	12.4052	Other
NCU01496	0.0515902	1	0.906298	18.5591	17.6097	Other
NCU01498	0.0191994	1	1	17.5413	17.0243	Other
NCU01499	0.0749316	1	1	16.8975	15.7894	Other
NCU01500	-0.096966	1	0.807202	16.219	17.0714	Other
NCU01501	0.0338034	1	1	15.4358	14.9065	Other
NCU01502	0.121119	1	0.79816	15.8603	14.3956	Other
NCU01503	0.0952081	1	0.89908	16.288	14.997	Other
NCU01504	-0.0726237	1	0.89908	15.3038	15.911	Other
NCU01505	0.572705	1	0.155017	17.9357	11.8724	Other
NCU01506	-0.203767	1	0.608934	14.3366	16.2798	Other
NCU01509	0.0560934	1	1	16.3559	15.484	Other
NCU01510	0.0083531	1	1	16.355	15.9981	Other
NCU01511	0.0889828	1	0.891927	14.1729	13.1254	Other
NCU01512	0.167218	1	0.703547	16.4683	14.4439	Other
NCU01514	0.0125379	1	1	15.2966	14.9506	Other
NCU01515	-0.237967	1	0.620158	15.0053	17.4317	Other
NCU01516	-0.333909	1	0.381751	14.2791	17.6348	Other
NCU01517	0.0327056	1	1	16.6928	16.0848	Other
NCU01519	-0.208914	1	0.694014	13.6721	15.5796	Other
NCU01520	-0.235445	1	0.625421	15.5854	18.1558	Other
NCU01521	0.212596	1	0.698894	16.1618	13.7606	Other
NCU01522	-0.0332435	1	1	15.2263	15.3739	Other
NCU01523	-0.0301532	1	1	15.5597	15.6825	Other
NCU01524	-0.072183	1	1	15.9266	16.549	Other
NCU01525	0.0436378	1	1	16.5722	15.8301	Other
NCU01526	-0.235274	1	0.532325	14.766	17.0253	Other
NCU01527	0.034299	1	1	15.3774	14.7679	Other
NCU01528	-0.681131	0.384728	0.0448388	15.6589	24.8537	Other
NCU01529	-0.00946284	1	1	18.7077	18.6518	Other
NCU01530	0.0179749	1	1	15.1127	14.6476	Other
NCU01531	0.121018	1	0.897426	15.8249	14.3182	Other
NCU01532	0.134104	1	0.801314	16.442	14.7241	Other
NCU01534	0.0753441	1	0.902162	16.9248	15.844	Other
NCU01535	-0.190626	1	0.625421	15.8857	17.8956	Other
NCU01536	-0.533656	0.961015	0.135403	15.5888	22.2568	Other
NCU01539	-0.0363066	1	1	15.4004	15.52	Other
NCU01540	-0.258144	1	0.608934	13.8815	16.3656	Other
NCU01541	-0.27024	1	0.488703	17.1803	20.3627	Other
NCU01542	0.309619	1	0.442643	17.1062	13.5734	Other
NCU01543	-0.104064	1	0.807202	16.1744	17.1128	Other
NCU01545	-0.414451	1	0.235117	15.3725	20.1246	Other
NCU01546	-0.26605	1	0.482808	16.8022	19.9473	Other
NCU01547	-0.0838323	1	1	14.9439	15.6654	Other
NCU01548	-0.301129	1	0.532325	14.4308	17.566	Other
NCU01549	-0.179809	1	0.630471	16.2541	18.1604	Other
NCU01550	0.0929208	1	0.895687	14.9597	13.7882	Other
NCU01551	0.173183	1	0.707991	17.0902	14.8924	Other
NCU01552	-0.22828	1	0.635322	16.4944	19.0668	Other
NCU01553	-0.0623538	1	0.904978	17.4156	17.8873	Other
NCU01554	0.00466405	1	1	16.0845	15.8152	Other
NCU01555	-0.0670933	1	0.909951	19.2818	19.8911	Other
NCU01559	-0.228253	1	0.625421	15.5439	17.9459	Other
NCU01560	-0.255913	1	0.550429	15.9055	18.7538	Other
NCU01561	0.148268	1	0.79816	16.3443	14.5073	Other
NCU01562	-0.0425775	1	1	13.8745	14.0676	Other
[truncated: 7,731 more rows]
