# Supplementary material for: The ACF chromatin-remodeling complex is essential for Polycomb repression
Source: eLife. 2022 Mar 8;11:e77595. doi: 10.7554/eLife.77595 (PMC9038196; doi:10.7554/eLife.77595)
Supplement: Figure 3—source data 2. [file elife-77595-fig3-data2.xlsx]

## Sheet: acf1
genes	logFC	FDR	Pvalue	acf1	wt	category
NCU00033	-1.10209	1	0.035567	9.0595	17.9802	Down
NCU00047	-1.09113	1	0.0408504	9.11558	17.1032	Down
NCU00048	-1.39294	0.747809	0.00722447	8.10811	18.0654	Down
NCU00082	-1.33566	0.797433	0.0113004	8.80723	18.3359	Down
NCU00123	-1.39921	0.862036	0.0144465	7.33159	16.1736	Down
NCU00164	-2.94394	7.02747e-06	3.67688e-09	4.3209	30.581	Down
NCU00179	-1.15203	0.814761	0.0128118	11.4527	22.886	Down
NCU00197	-1.34568	0.814761	0.0127825	7.71564	16.7317	Down
NCU00229	-1.32802	0.797433	0.0088156	9.29225	19.7323	Down
NCU00248	-1.17397	0.946496	0.0249999	9.39667	17.8199	Down
NCU00271	-1.39624	0.747809	0.00643791	8.50197	19.2017	Down
NCU00288	-1.1593	0.967015	0.0286228	8.67204	16.7862	Down
NCU00343	-1.05496	1	0.0492856	10.3156	18.2156	Down
NCU00365	-1.38131	0.747809	0.00643791	8.554	18.7348	Down
NCU00384	-1.34012	0.797433	0.0113004	8.54913	17.9783	Down
NCU00439	-1.42531	0.747809	0.00572882	8.53743	20.0487	Down
NCU00462	-1.41552	0.747809	0.00643791	8.15139	18.7699	Down
NCU00485	-1.11352	0.967015	0.0270312	10.7442	20.0446	Down
NCU00491	-1.53299	0.747809	0.00360143	8.24725	20.1001	Down
NCU00500	-1.1364	0.913696	0.0218484	10.2279	19.0979	Down
NCU00510	-1.1786	0.967015	0.0286228	8.5592	17.1731	Down
NCU00516	-1.24707	0.913696	0.0221616	7.85954	16.1532	Down
NCU00557	-1.12376	1	0.0327912	8.11267	15.7013	Down
NCU00583	-1.1161	1	0.0408504	9.41871	17.2204	Down
NCU00594	-1.30262	0.797433	0.00998352	8.98951	18.6063	Down
NCU00645	-1.30299	0.747809	0.00534313	10.8019	24.2101	Down
NCU00804	-1.45289	0.747809	0.00360143	8.14255	19.9679	Down
NCU00851	-1.07606	0.967015	0.0270312	10.7649	19.6051	Down
NCU00907	-1.21392	0.967015	0.0286228	9.0907	17.5587	Down
NCU00922	-1.42512	0.747809	0.00643791	8.75925	19.2937	Down
NCU00948	-1.11236	0.913696	0.0218484	10.1272	18.6483	Down
NCU00961	-1.25342	0.797433	0.010149	10.8299	22.1817	Down
NCU00989	-1.15825	0.946496	0.0249999	9.00545	17.8954	Down
NCU00995	-1.17206	0.946496	0.0249999	9.19568	18.2867	Down
NCU01010	-1.06986	0.967015	0.0270312	10.6327	19.9314	Down
NCU01096	-1.2025	1	0.0375916	7.83574	15.1383	Down
NCU01127	-1.00736	0.967015	0.0283982	11.4946	21.6414	Down
NCU01153	-1.37719	0.797433	0.0113004	7.96232	17.9839	Down
NCU01159	-1.01259	1	0.0428837	10.4125	18.8965	Down
NCU01308	-1.35828	0.747809	0.00643791	8.44671	18.6193	Down
NCU01313	-1.44057	0.747809	0.00722447	7.61062	17.6696	Down
NCU01346	-1.38826	0.747809	0.00572882	9.57793	19.6687	Down
NCU01385	-1.36945	0.814761	0.0127825	7.81745	17.0002	Down
NCU01392	-1.19559	0.892426	0.0194521	8.6492	16.784	Down
NCU01396	-1.16293	0.797433	0.0115558	10.3879	20.631	Down
NCU01415	-1.34873	0.747809	0.00572882	9.11521	19.8297	Down
NCU01416	-1.33503	0.797433	0.00998352	8.86525	18.8383	Down
NCU01450	-1.28303	0.862036	0.014989	9.27402	19.4495	Down
NCU01488	-1.19298	0.946496	0.0249999	9.38075	18.402	Down
NCU01519	-1.38069	0.747809	0.00643791	8.4758	18.9675	Down
NCU01681	-1.72409	0.586958	0.00066357	7.83836	21.2518	Down
NCU01684	-1.28676	0.797433	0.00998352	9.08806	18.7848	Down
NCU01686	-1.13653	1	0.035567	10.1364	18.4381	Down
NCU01746	-1.05481	1	0.0309942	10.3722	19.0232	Down
NCU01863	-1.52711	0.747809	0.00218316	8.17838	19.5815	Down
NCU01872	-1.08049	1	0.0408504	9.75676	17.0794	Down
NCU01876	-1.11361	0.747809	0.00280071	15.6753	30.9136	Down
NCU01891	-1.02835	0.967015	0.0270312	10.9822	19.5194	Down
NCU01923	-1.18161	0.967015	0.0286228	8.57645	17.45	Down
NCU01942	-1.36215	0.747809	0.00572882	8.79888	19.5811	Down
NCU01946	-1.67164	0.747809	0.00307992	6.26674	15.9872	Down
NCU01958	-6.03654	2.55134e-08	7.86641e-12	0.278429	24.4951	Down
NCU01959	-8.33345	8.46445e-14	8.69933e-18	0	37.6678	Down
NCU01960	-7.98856	1.99319e-12	4.09699e-16	0.0259059	34.0784	Down
NCU02073	-1.03917	1	0.037348	11.0469	20.2435	Down
NCU02129	-1.1084	0.967015	0.0286228	9.32785	16.7556	Down
NCU02145	-1.236	0.820808	0.0131599	9.79845	19.8556	Down
NCU02171	-1.39646	0.747809	0.00572882	8.35866	19.6502	Down
NCU02183	-1.38099	0.747809	0.00572882	9.01002	19.7481	Down
NCU02258	-1.1627	0.913696	0.0218484	9.83599	19.0837	Down
NCU02308	-1.12522	0.913696	0.0218484	9.84237	18.951	Down
NCU02309	-1.19587	0.862036	0.0170746	8.75479	17.8316	Down
NCU02365	-1.21058	0.946496	0.0249999	8.68266	18.1774	Down
NCU02377	-1.37281	0.747809	0.00572882	8.78862	20.106	Down
NCU02436	-1.22477	0.747809	0.0060575	10.4256	22.7407	Down
NCU02501	-1.33473	0.797433	0.00998352	9.34141	19.0272	Down
NCU02517	-1.65599	0.747809	0.00117011	7.34574	20.6845	Down
NCU02574	-1.35258	0.797433	0.00998352	8.95367	19.3484	Down
NCU02575	-1.06496	1	0.046964	8.87843	16.2104	Down
NCU02607	-1.02064	1	0.0428837	10.6833	18.9504	Down
NCU02622	-1.22862	0.862036	0.014989	9.40848	19.3096	Down
NCU02638	-1.26002	0.862036	0.0170746	8.88888	18.0903	Down
NCU02672	-1.01197	1	0.035567	10.4158	17.611	Down
NCU02698	-1.03244	1	0.0428837	11.0256	19.1035	Down
NCU02774	-1.21401	0.892426	0.0194521	8.34727	17.0546	Down
NCU02817	-1.09041	0.797433	0.00862551	13.2924	25.3613	Down
NCU02920	-1.20061	0.747809	0.00604981	12.3835	26.0607	Down
NCU02953	-1.2291	1	0.0327912	8.25484	16.5084	Down
NCU03014	-1.12065	0.967015	0.0286228	8.64056	16.801	Down
NCU03034	-1.16696	0.967015	0.0286228	9.23447	17.285	Down
NCU03044	-1.32565	0.814761	0.0127825	8.23757	17.1473	Down
NCU03140	-1.61876	0.747809	0.00541444	6.33039	16.2562	Down
NCU03165	-1.16849	0.913696	0.0218484	9.83819	19.037	Down
NCU03167	-1.04665	1	0.046964	9.25718	16.0369	Down
NCU03180	-1.12497	0.862036	0.0167143	10.9052	21.142	Down
NCU03182	-1.55692	0.721212	0.00088947	8.97932	23.5769	Down
NCU03202	-1.16997	0.797433	0.0115558	10.4435	20.7746	Down
NCU03275	-1.12483	0.892426	0.0191048	10.4007	19.4793	Down
NCU03452	-1.56678	0.747809	0.00239767	7.74699	18.9561	Down
NCU03520	-1.23465	0.946496	0.0249999	8.75435	18.5237	Down
NCU03553	-1.11636	1	0.0408504	8.88714	17.5281	Down
NCU03568	-1.08072	1	0.035567	9.88566	17.6844	Down
NCU03614	-1.11989	0.913696	0.0218484	9.97309	18.6553	Down
NCU03620	-1.34741	0.797433	0.0113004	8.1118	18.137	Down
NCU03640	-1.13713	0.946496	0.0249999	9.25802	18.0733	Down
NCU03665	-1.18884	0.892426	0.0191048	10.3202	20.0409	Down
NCU03700	-1.27279	0.952164	0.0252475	7.70748	15.1588	Down
NCU03701	-1.50304	0.747809	0.00400662	7.97283	18.631	Down
NCU03707	-1.07716	1	0.0408504	9.1756	16.8127	Down
NCU03721	-1.50594	0.747809	0.00322999	9.02883	21.0678	Down
NCU03746	-1.54602	0.747809	0.00218316	7.91392	19.5354	Down
NCU03780	-1	1	0.0492856	10.3223	18.4459	Down
NCU03828	-1.46463	0.787437	0.00809288	7.42011	17.3692	Down
NCU03829	-1.48312	0.747809	0.00400662	8.12691	19.2308	Down
NCU03854	-1.011	1	0.037348	11.0741	20.2919	Down
NCU03879	-1.50202	0.747809	0.0044454	7.79678	17.7344	Down
NCU03895	-1.49131	0.747809	0.0044454	7.32709	17.9926	Down
NCU04006	-1.48368	0.747809	0.00360143	8.71097	20.0622	Down
NCU04052	-1.43474	0.747809	0.00722447	8.22395	18.4444	Down
NCU04103	-1.1892	0.913696	0.0218484	10.13	19.3954	Down
NCU04146	-1.26718	0.862036	0.0170746	8.976	18.1121	Down
NCU04276	-1.0361	0.967015	0.0283982	12.0576	21.9787	Down
NCU04286	-1.6807	0.747809	0.00285106	6.71283	17.2649	Down
NCU04330	-1.50345	0.747809	0.00179126	8.7502	21.7295	Down
NCU04351	-1.08404	1	0.046964	8.88476	16.0343	Down
NCU04420	-1.54442	0.747809	0.0044454	7.56198	18.2283	Down
NCU04563	-1.00948	0.797433	0.0111074	15.4589	28.5167	Down
NCU04658	-1.02682	1	0.037348	11.2783	20.0326	Down
NCU04873	-1.48734	0.787437	0.00809288	7.31012	17.2967	Down
NCU04925	-1.16708	1	0.0431249	7.72817	14.1314	Down
NCU04974	-1.37744	0.862036	0.0144465	7.39589	15.8315	Down
NCU05024	-1.07386	1	0.035567	9.65512	18.1511	Down
NCU05070	-1.1181	1	0.035567	9.86939	18.1664	Down
NCU05150	-1.32781	0.797433	0.0113004	8.53317	18.4991	Down
NCU05177	-1.51309	0.747809	0.0044454	7.72173	17.8947	Down
NCU05284	-1.56842	0.747809	0.00400662	7.89916	19.4293	Down
NCU05368	-1.6833	0.586958	0.00066357	7.37808	20.6198	Down
NCU05370	-1.18372	0.913696	0.0218484	9.65513	19.2519	Down
NCU05391	-1.0554	1	0.0309942	10.5819	18.6096	Down
NCU05437	-1.53457	0.747809	0.0044454	7.71931	18.3032	Down
NCU05507	-1.22367	1	0.0327912	8.30236	16.3254	Down
NCU05556	-1.06154	1	0.046964	8.84334	16.2763	Down
NCU05570	-1.30639	0.797433	0.0113004	8.54037	18.1366	Down
NCU05576	-1.32849	0.797433	0.00998352	8.79184	19.2085	Down
NCU05662	-1.31357	0.747809	0.00686626	9.99304	21.8965	Down
NCU05703	-1.31579	0.862036	0.0170746	8.53962	18.3721	Down
NCU05742	-1.30461	0.862036	0.0170746	8.69538	18.2594	Down
NCU05766	-1.00429	1	0.0492856	10.3147	18.0776	Down
NCU05784	-1.06664	1	0.046964	8.57091	16.293	Down
NCU05892	-1.08139	0.913696	0.0218484	9.78433	18.5785	Down
NCU05947	-1.04074	0.747809	0.00370719	19.3394	34.2824	Down
NCU05998	-1.08158	1	0.035567	9.92161	18.4942	Down
NCU06000	-1.38664	0.747809	0.00722447	8.02004	17.6265	Down
NCU06094	-1.27707	0.862036	0.0170746	8.79418	18.0686	Down
NCU06096	-1.55519	0.747809	0.00179126	8.61534	22.3509	Down
NCU06124	-1.39788	0.787437	0.00809288	7.75866	16.8445	Down
NCU06185	-1.03652	1	0.035567	10.0756	17.8839	Down
NCU06236	-1.13228	0.946496	0.0249999	9.83047	18.0359	Down
NCU06313	-1.16398	0.946496	0.0249999	9.16899	17.6063	Down
NCU06350	-1.20049	0.747809	0.00251323	14.2678	29.277	Down
NCU06455	-1.28235	0.862036	0.0170746	8.73386	18.22	Down
NCU06529	-1.29331	0.892426	0.0194521	7.62229	17.0991	Down
NCU06640	-1.34194	0.862036	0.0144465	7.33522	16.2266	Down
NCU06657	-1.14307	1	0.046964	8.78042	16.4791	Down
NCU06683	-1.53309	0.747809	0.00400662	7.40116	18.8456	Down
NCU06686	-1.28085	0.797433	0.0088156	9.32998	19.5139	Down
NCU06690	-1.51238	0.747809	0.00198056	8.70852	20.6599	Down
NCU06784	-1.14054	0.892426	0.0191048	10.546	19.8475	Down
NCU06795	-1.28098	0.797433	0.0088156	9.57476	19.9633	Down
NCU06797	-1.57707	0.747809	0.00400662	8.07428	19.5273	Down
NCU06841	-1.11379	0.967015	0.0286228	9.01848	16.6228	Down
NCU06872	-1.36967	0.862036	0.0144465	7.73437	16.2706	Down
NCU06876	-1.01633	0.892426	0.0180073	12.6478	22.5121	Down
NCU06912	-1.12432	0.862036	0.0167143	10.6895	20.9212	Down
NCU07161	-1.36239	0.797433	0.0113004	8.52424	18.5144	Down
NCU07239	-1.70112	0.747809	0.00262163	6.58206	18.3445	Down
NCU07316	-1.13745	0.913696	0.0218484	9.67318	18.8255	Down
NCU07317	-1.55416	0.747809	0.00400662	7.56078	19.0682	Down
NCU07390	-1.55273	0.747809	0.0044454	7.32338	17.8163	Down
NCU07396	-1.14846	0.946496	0.0249999	9.26868	18.2413	Down
NCU07406	-1.37899	0.747809	0.00509189	8.80497	20.6123	Down
NCU07413	-1.17364	0.862036	0.0167143	10.6683	21.1236	Down
NCU07486	-1.27288	0.747809	0.00471245	12.3643	25.0053	Down
NCU07555	-1.42788	0.747809	0.00643791	8.26368	19.0154	Down
NCU07613	-1.49835	0.747809	0.00360143	8.26487	19.593	Down
NCU07616	-1.23497	0.862036	0.0170746	8.63057	17.9233	Down
NCU07676	-1.41009	0.814761	0.0127825	7.7006	17.3671	Down
NCU07744	-1.55312	0.747809	0.00400662	7.81118	18.9532	Down
NCU07785	-1.1187	0.862036	0.0146301	11.9722	21.8423	Down
NCU07833	-1.51128	0.747809	0.00218316	8.9069	19.5309	Down
NCU07838	-1.10901	0.862036	0.0146301	11.4695	21.677	Down
NCU07847	-1.88541	0.405945	0.000375489	6.49454	20.0385	Down
NCU07848	-1.34333	0.913696	0.0221616	7.51183	16.3353	Down
NCU07867	-1.22836	0.892426	0.0194521	8.10721	17.086	Down
NCU07912	-1.15609	1	0.0327912	7.9335	15.9355	Down
NCU08014	-1.24754	0.862036	0.014989	8.91691	19.3255	Down
NCU08015	-1.54433	0.787437	0.00809288	7.19426	17.5461	Down
NCU08079	-1.11665	1	0.035567	9.74363	18.3895	Down
NCU08170	-1.07657	0.747809	0.0058265	15.1693	28.3315	Down
NCU08305	-1.50885	0.787437	0.00809288	7.03757	17.2435	Down
NCU08321	-1.37959	0.797433	0.0113004	8.06055	18.059	Down
NCU08470	-1.02749	0.946496	0.0235923	11.5975	20.5336	Down
NCU08506	-1.14341	0.862036	0.0167143	10.5446	20.6668	Down
NCU08508	-1.34105	0.814761	0.0127825	8.2206	17.3317	Down
NCU08557	-1.24911	0.862036	0.014989	9.2497	19.354	Down
NCU08617	-1.0929	0.967015	0.0270312	10.7168	20.1341	Down
NCU08636	-1.04787	1	0.0309942	9.87179	18.6418	Down
NCU08774	-1.03346	1	0.0492856	10.0207	18.0779	Down
NCU08777	-1.12907	0.967015	0.0286228	8.74086	16.9099	Down
NCU08822	-1.33498	0.892426	0.0194521	8.01377	17.596	Down
NCU08830	-1.50516	0.364491	0.000299684	11.7546	29.1715	Down
NCU08937	-1.38218	0.797433	0.0113004	8.29172	18.3214	Down
NCU08979	-1.05167	1	0.0309942	9.88328	18.6086	Down
NCU08987	-1.38985	0.747809	0.00572882	8.87263	19.9944	Down
NCU09028	-1.10865	0.814761	0.0128118	12.0453	22.6992	Down
NCU09046	-1.11041	0.747809	0.00346845	16.2515	32.6477	Down
NCU09066	-1.46665	0.747809	0.00643791	8.15206	19.1639	Down
NCU09084	-1.31007	0.797433	0.00998352	8.63483	19.2018	Down
NCU09096	-1.19302	0.967015	0.0286228	9.23829	17.3133	Down
NCU09145	-1.53902	0.747809	0.00239767	7.76871	18.7002	Down
NCU09242	-1.40029	0.747809	0.00722447	8.33565	18.169	Down
NCU09268	-1.03811	1	0.0492856	9.99123	18.0949	Down
NCU09323	-1.19318	0.946496	0.0249999	9.88487	18.4525	Down
NCU09348	-1.26514	0.913696	0.0221616	7.9645	16.4102	Down
NCU09351	-1.1855	0.797433	0.0115558	10.4287	20.6243	Down
NCU09393	-1.07493	1	0.035567	10.1206	18.3534	Down
NCU09394	-1.24728	0.892426	0.0194521	8.4114	17.1105	Down
NCU09448	-1.11971	1	0.046964	8.32419	16.1138	Down
NCU09667	-1.22392	1	0.0375916	7.58778	15.0177	Down
NCU09682	-1.10704	1	0.0309942	10.2513	19.2895	Down
NCU09687	-1.17253	0.820808	0.0131599	10.4604	19.6728	Down
NCU09809	-1.45196	0.747809	0.00643791	8.18314	19.4166	Down
NCU09968	-3.12787	1.06275e-06	4.36894e-10	3.65165	31.4079	Down
NCU09969	-2.51667	7.02747e-06	4.33349e-09	6.25237	36.3215	Down
NCU10076	-1.2839	0.797433	0.0088156	9.33247	19.9125	Down
NCU10092	-1.75495	0.747809	0.00137378	6.47939	18.6994	Down
NCU10274	-1.15831	0.967015	0.0286228	8.78399	17.0895	Down
NCU10396	-1.18441	0.862036	0.0170746	8.67379	17.7869	Down
NCU10429	-1.1248	0.747809	0.00688309	12.3183	24.2308	Down
NCU10449	-1.08792	1	0.0408504	9.67597	16.8675	Down
NCU10621	-1.6547	0.747809	0.00239767	7.46436	19.2069	Down
NCU10697	-1.04182	0.892426	0.0189281	13.1507	24.9426	Down
NCU10772	-1.3959	0.892426	0.0183837	6.41996	14.198	Down
NCU10894	-1.33874	0.797433	0.00998352	8.63227	18.7334	Down
NCU10896	-1.25385	0.913696	0.0221616	8.10758	15.8717	Down
NCU10954	-1.05025	0.967015	0.0270312	10.5343	19.4945	Down
NCU11151	-1.3565	0.747809	0.00643791	8.05152	18.9274	Down
NCU11290	-1.29552	0.797433	0.0113004	8.38728	17.8107	Down
NCU11293	-1.13998	0.946496	0.0249999	9.41975	17.9169	Down
NCU11300	-1.3974	0.747809	0.00722447	8.1129	18.129	Down
NCU12045	-1.99892	0.00330863	2.38031e-06	9.15569	31.2181	Down
NCU16305	-1.17199	0.913696	0.0218484	9.79817	19.1773	Down
NCU16310	-1.4577	0.797433	0.00904589	7.32413	16.2778	Down
NCU16325	-1.0315	0.913696	0.020605	11.3166	21.6696	Down
NCU16334	-1.31601	0.892426	0.0194521	8.25138	17.5758	Down
NCU16352	-1.19101	0.946496	0.0249999	9.36769	17.9434	Down
NCU16353	-1.26732	0.913696	0.0221616	8.0559	16.4048	Down
NCU16361	-1.09292	0.967015	0.0270312	11.1361	20.1788	Down
NCU16366	-1.30868	0.747809	0.00686626	10.1063	21.8367	Down
NCU16371	-1.4116	0.747809	0.00722447	7.95351	17.8846	Down
NCU16372	-1.35671	0.747809	0.00452143	9.802	21.7302	Down
NCU16376	-1.51298	0.747809	0.00360143	8.12388	19.7737	Down
NCU16380	-1.24526	0.862036	0.0170746	9.02219	18.4389	Down
NCU16381	-1.316	0.913696	0.0221616	8.25736	16.6412	Down
NCU16382	-1.34396	0.747809	0.00643791	8.6224	18.696	Down
NCU16409	-1.11127	0.913696	0.0218484	9.83719	18.6167	Down
NCU16441	-1.21368	0.862036	0.0170746	9.01886	17.9752	Down
NCU16452	-1.04739	1	0.0492856	10.3859	18.245	Down
NCU16459	-1.1061	0.967015	0.0286228	9.09943	16.7388	Down
NCU16501	-1.05778	1	0.0492856	10.2	18.4755	Down
NCU16553	-1.31778	0.797433	0.00998352	8.95887	19.1789	Down
NCU16557	-1.352	0.747809	0.00643791	8.63928	18.5689	Down
NCU16558	-1.1172	0.946496	0.0235923	11.5551	21.3059	Down
NCU16561	-1.32301	0.797433	0.00998352	8.70373	18.7484	Down
NCU16562	-1.15745	0.946496	0.0249999	9.43144	17.818	Down
NCU16567	-1.59807	0.747809	0.00107188	8.54951	22.389	Down
NCU16645	-1.4024	0.747809	0.00722447	8.16363	18.1793	Down
NCU16649	-1.22374	1	0.0375916	8.10527	15.3594	Down
NCU16677	-1.32061	0.797433	0.0113004	8.85551	18.3261	Down
NCU16678	-1.17231	0.913696	0.0218484	9.95149	19.3024	Down
NCU16685	-1.17086	1	0.0327912	8.33103	16.4316	Down
NCU16686	-1.2635	0.862036	0.0170746	8.84306	18.4724	Down
NCU16688	-1.29036	0.892426	0.0194521	8.01422	16.9032	Down
NCU16713	-1.35937	0.797433	0.0088156	9.38337	20.4059	Down
NCU16714	-1.19335	0.862036	0.0170746	8.61509	17.7289	Down
NCU16754	-1.30454	0.797433	0.00998352	9.2846	19.0387	Down
NCU16755	-1.1641	1	0.0375916	7.79863	14.8194	Down
NCU16763	-1.32412	0.797433	0.00998352	8.68174	18.615	Down
NCU16777	-1.14906	0.946496	0.0249999	9.28158	18.3653	Down
NCU16786	-1.38056	0.814761	0.0127825	7.78992	17.4351	Down
NCU16807	-1.09447	0.862036	0.0157464	12.5569	24.204	Down
NCU16826	-1.41329	0.747809	0.00643791	8.07269	19.1573	Down
NCU16830	-1.55972	0.747809	0.0044454	7.33046	17.8362	Down
NCU16834	-1.19423	0.913696	0.0218484	9.92709	19.4029	Down
NCU16857	-1.23123	0.797433	0.0115558	10.5761	21.3125	Down
NCU16867	-1.12763	1	0.0309942	10.5894	19.3271	Down
NCU16892	-1.08095	0.913696	0.020605	11.4004	21.7871	Down
NCU16948	-1.15981	0.892426	0.0191048	9.9935	19.9717	Down
NCU16967	-1.28429	0.787437	0.00778127	9.67317	20.9754	Down
NCU16980	-1.41161	0.797433	0.0113004	8.38386	18.4201	Down
NCU16988	-1.47613	0.747809	0.00322999	9.08121	21.1299	Down
NCU16991	-1.23715	0.820808	0.0131599	9.70969	19.7878	Down
NCU16998	-1.01319	1	0.0492856	10.1385	18.4431	Down
NCU17004	-1.24588	0.862036	0.014989	9.12349	19.0918	Down
NCU17024	-1.14436	0.946496	0.0249999	9.64103	18.3444	Down
NCU17031	-1.03272	0.967015	0.0270312	10.8102	19.7218	Down
NCU17032	-1.10666	1	0.0309942	10.4194	19.2484	Down
NCU17037	-1.52847	0.747809	0.00491603	6.6268	17.0914	Down
NCU17073	-1.35914	0.797433	0.00998352	8.75107	19.1928	Down
NCU17074	-1.06987	1	0.035567	9.7551	17.6398	Down
NCU17107	-1.04806	1	0.0408504	9.14271	16.737	Down
NCU17126	-1.2443	0.862036	0.014989	9.01678	19.183	Down
NCU17145	-1.79169	0.747809	0.00137378	6.77023	19.5357	Down
NCU17230	-1.27366	0.892426	0.0194521	8.58542	17.4755	Down
NCU17232	-1.30424	0.797433	0.00998352	8.88809	18.6943	Down
NCU17251	-1.17349	0.797433	0.0115558	10.3974	20.8083	Down
NCU17252	-1.05564	0.967015	0.0270312	10.4886	19.7539	Down
NCU00003	-0.375183	1	0.466008	18.3696	20.2603	Other
NCU00004	0.0889793	1	0.928719	37.3813	33.274	Other
NCU00005	0.0327081	1	1	25.0329	22.3129	Other
NCU00006	0.0831664	1	0.923371	33.4054	28.9463	Other
NCU00007	0.089724	1	0.872585	35.9888	31.6021	Other
NCU00008	-0.0107476	1	1	28.9367	26.5708	Other
NCU00009	-0.168613	1	0.634263	31.143	32.8934	Other
NCU00010	0.104176	1	0.819456	37.7212	31.9826	Other
NCU00011	-0.729929	1	0.218873	10.1004	15.3069	Other
NCU00013	-0.123011	1	0.73741	32.2525	31.5156	Other
NCU00014	0.134902	1	0.753802	33.0417	28.2076	Other
NCU00015	-0.363653	1	0.418784	17.7545	20.5782	Other
NCU00017	-0.0711762	1	0.960578	30.5158	29.4225	Other
NCU00018	0.346863	1	0.251567	47.309	34.6812	Other
NCU00019	0.0956169	1	0.924537	34.4056	29.5746	Other
NCU00021	0.282009	1	0.394637	38.9497	29.3089	Other
NCU00022	-0.137005	1	0.672798	29.3221	29.6839	Other
NCU00023	0.0196773	1	1	33.0808	29.7647	Other
NCU00024	-0.196117	1	0.704781	24.6731	25.5901	Other
NCU00025	0.236926	1	0.49495	33.9065	26.6051	Other
NCU00026	-0.236923	1	0.559248	20.1463	22.2588	Other
NCU00027	-0.0034381	1	1	26.4814	24.4718	Other
NCU00028	-0.0488295	1	0.955988	24.5984	23.4742	Other
NCU00029	-0.0998501	1	0.83355	26.2001	26.2108	Other
NCU00030	0.0964889	1	0.909679	24.0266	20.5755	Other
NCU00031	-0.489715	1	0.18089	22.3154	29.3205	Other
NCU00032	-0.178411	1	0.650087	25.5293	26.0157	Other
NCU00034	0.092817	1	0.911571	25.1531	21.4066	Other
NCU00035	0.0963315	1	0.85528	28.2105	24.6603	Other
NCU00037	0.187449	1	0.659151	36.9581	29.5808	Other
NCU00038	0.127416	1	0.749969	32.4946	27.4488	Other
NCU00039	0.0190967	1	1	36.0384	32.4111	Other
NCU00040	0.380068	1	0.205529	44.8242	31.1272	Other
NCU00041	-0.031852	1	1	35.0554	32.9541	Other
NCU00042	-0.133555	1	0.779412	27.5631	28.1262	Other
NCU00043	0.207513	1	0.62086	38.8516	31.3294	Other
NCU00045	0.225405	1	0.468432	44.261	34.8991	Other
NCU00046	0.167083	1	0.668085	39.1422	31.736	Other
NCU00050	-0.0281678	1	0.959912	29.3094	27.8757	Other
NCU00051	-0.427767	1	0.301983	18.9667	23.2884	Other
NCU00052	0.0733761	1	0.87764	40.3441	34.8971	Other
NCU00054	0.0698968	1	0.932275	42.5099	37.2626	Other
NCU00055	0.261834	1	0.3806	48.462	37.6042	Other
NCU00056	0.129847	1	0.798953	29.8987	25.19	Other
NCU00057	0.230343	1	0.553119	36.021	27.9293	Other
NCU00059	0.178561	1	0.745952	32.1546	25.7273	Other
NCU00060	0.290511	1	0.425549	37.0184	27.8474	Other
NCU00061	0.0783913	1	0.920868	31.0831	26.9764	Other
NCU00064	0.2463	1	0.451244	40.9675	31.983	Other
NCU00065	0.139766	1	0.745952	31.9374	26.5138	Other
NCU00066	0.26644	1	0.438829	39.5841	30.1551	Other
NCU00067	-0.2115	1	0.68652	21.586	22.8199	Other
NCU00068	0.270792	1	0.369616	47.2286	35.5723	Other
NCU00069	-0.987033	1	0.101987	9.02207	15.525	Other
NCU00070	0.222882	1	0.51454	37.071	29.4127	Other
NCU00071	-0.388744	1	0.297962	26.3284	31.4268	Other
NCU00072	-0.132777	1	0.823547	23.0125	23.4627	Other
NCU00073	0.380339	1	0.260107	39.7552	28.1699	Other
NCU00074	0.257664	1	0.537925	25.5684	20.0274	Other
NCU00075	0.109622	1	0.862562	31.0152	26.9709	Other
NCU00076	0.104296	1	0.816907	35.7018	30.7602	Other
NCU00077	0.0502787	1	0.981622	34.9819	31.5165	Other
NCU00078	-0.0457986	1	0.956865	24.2831	24.0107	Other
NCU00079	0.0101051	1	1	26.0243	24.7665	Other
NCU00080	0.0799403	1	0.862562	30.4344	27.4907	Other
NCU00081	0.205078	1	0.58547	41.1193	33.2377	Other
NCU00083	0.300897	1	0.438829	38.709	29.4599	Other
NCU00084	-0.166054	1	0.667536	27.617	28.7774	Other
NCU00085	-0.235623	1	0.559248	20.1564	22.1543	Other
NCU00086	-0.0854583	1	0.897868	27.662	27.2414	Other
NCU00087	0.0930362	1	0.916606	28.5515	23.9753	Other
NCU00088	-0.0170566	1	1	26.4919	24.101	Other
NCU00089	0.0627945	1	0.920868	31.7333	27.4503	Other
NCU00090	-0.127286	1	0.78308	30.0764	29.2719	Other
NCU00091	0.034459	1	0.981353	35.2043	31.2963	Other
NCU00092	-0.209326	1	0.591542	25.0449	26.0994	Other
NCU00093	0.201458	1	0.570201	38.8066	30.7942	Other
NCU00095	0.283401	1	0.363907	46.3981	34.5258	Other
NCU00096	-0.103256	1	0.751804	35.5098	35.4073	Other
NCU00097	0.436169	1	0.159891	45.8342	30.2076	Other
NCU00099	-0.812924	1	0.0578479	14.3613	22.4478	Other
NCU00100	0.0108248	1	1	37.6961	34.0115	Other
NCU00101	-0.178076	1	0.704781	24.678	25.7521	Other
NCU00102	-0.0448454	1	0.961816	33.0395	30.7778	Other
NCU00103	0.442912	1	0.251334	33.726	23.0442	Other
NCU00104	0.0809032	1	0.814247	34.9635	30.417	Other
NCU00105	0.0118817	1	1	26.4853	24.4487	Other
NCU00106	0.180286	1	0.700704	34.1611	27.8429	Other
NCU00107	0.00987766	1	1	22.8706	21.035	Other
NCU00108	0.192473	1	0.600217	34.1659	28.2993	Other
NCU00109	0.18313	1	0.700704	33.2799	27.6778	Other
NCU00110	0.158686	1	0.749969	32.3017	27.0021	Other
NCU00111	-0.498955	1	0.265305	16.1325	20.7549	Other
NCU00112	0.123442	1	0.764322	36.0194	30.8484	Other
NCU00114	0.179147	1	0.686423	30.989	25.1599	Other
NCU00115	0.283947	1	0.425549	37.0279	27.8899	Other
NCU00116	-0.178336	1	0.692978	22.5487	23.3383	Other
NCU00117	0.102027	1	0.77063	38.3773	33.104	Other
NCU00118	0.140857	1	0.724247	39.8323	33.5471	Other
NCU00119	0.184272	1	0.605691	36.0966	29.1573	Other
NCU00120	0.061986	1	0.926717	35.6415	31.8836	Other
NCU00121	0.265671	1	0.478602	38.8913	29.6955	Other
NCU00122	-0.0827525	1	0.83355	27.4462	26.0018	Other
NCU00124	0.300862	1	0.314924	43.4199	32.2024	Other
NCU00125	0.0984195	1	0.860259	30.3313	26.4777	Other
NCU00126	0.0754645	1	0.980145	30.7267	26.7909	Other
NCU00127	0.0418602	1	0.980469	31.6563	28.3521	Other
NCU00128	0.0271509	1	1	40.5276	36.2753	Other
NCU00129	-0.205794	1	0.591542	24.4467	26.0463	Other
NCU00130	-0.305921	1	0.488722	18.7624	21.4967	Other
NCU00132	-0.256321	1	0.499052	19.2916	22.1478	Other
NCU00133	0.368975	1	0.25922	43.0547	31.5997	Other
NCU00134	0.196045	1	0.575476	39.7843	32.0972	Other
NCU00135	-0.134127	1	0.762624	24.5337	24.2237	Other
NCU00136	0.481328	1	0.148827	42.7402	27.8866	Other
NCU00137	0.0694929	1	0.9768	22.5721	19.8417	Other
NCU00138	-0.230436	1	0.52622	30.1102	31.9556	Other
NCU00142	0.0330982	1	1	27.4265	24.3466	Other
NCU00143	-0.0702259	1	0.896011	27.7133	26.1439	Other
NCU00144	-0.0165914	1	1	28.2696	26.3717	Other
NCU00145	-0.0205047	1	1	22.5198	21.4244	Other
NCU00146	-0.273647	1	0.517978	21.9631	24.6497	Other
NCU00147	-0.381018	1	0.313115	20.3809	24.0574	Other
NCU00148	0.0421228	1	0.980777	32.9569	29.1668	Other
NCU00149	-0.240917	1	0.512353	27.9474	30.2297	Other
NCU00150	-0.272185	1	0.568031	21.6185	23.9827	Other
NCU00151	0.0059247	1	1	31.3985	28.2482	Other
NCU00152	0.315225	1	0.2625	50.3173	36.746	Other
NCU00153	0.0479042	1	0.978666	26.8124	23.6638	Other
NCU00154	-0.0430055	1	0.958472	28.5234	26.3102	Other
NCU00155	0.162117	1	0.717027	38.25	31.5825	Other
NCU00157	-0.088601	1	0.7899	30.8779	30.5745	Other
NCU00158	0.100893	1	0.843486	24.7161	20.8377	Other
NCU00159	0.364134	1	0.322298	34.0333	24.3758	Other
NCU00160	-0.0152849	1	1	29.7792	27.9086	Other
NCU00161	-0.0763173	1	0.899629	29.3656	27.9969	Other
NCU00162	0.169939	1	0.691408	32.0396	26.1973	Other
NCU00163	-0.185145	1	0.643631	24.2556	25.0997	Other
NCU00166	-0.159228	1	0.704781	24.6936	25.3652	Other
NCU00167	0.114792	1	0.760966	35.9572	30.3072	Other
NCU00168	0.0323163	1	0.979067	27.868	24.6661	Other
NCU00169	0.156101	1	0.700704	34.9398	28.2159	Other
NCU00170	0.12382	1	0.85528	28.8288	24.1996	Other
NCU00171	-0.116571	1	0.891972	25.018	24.8286	Other
NCU00172	0.130854	1	0.757463	34.1715	29.3333	Other
NCU00173	-0.186996	1	0.629572	21.8777	23.1532	Other
NCU00175	-0.386027	1	0.333947	21.4992	26.6008	Other
NCU00176	-0.837538	1	0.0868459	12.3368	19.8942	Other
NCU00177	0.17392	1	0.663707	38.4636	30.745	Other
NCU00178	0.0583794	1	0.979067	27.8687	24.0985	Other
NCU00180	-0.0804787	1	0.902893	31.2074	30.2421	Other
NCU00181	0.0338538	1	1	30.5604	27.0723	Other
NCU00182	0.216287	1	0.605691	36.0055	28.5975	Other
NCU00183	-0.34919	1	0.441723	19.9534	22.7935	Other
NCU00184	0.01258	1	1	33.2206	29.9113	Other
NCU00185	0.00814428	1	1	38.0219	35.2239	Other
NCU00186	-0.322374	1	0.379835	23.1205	25.9203	Other
NCU00187	0.319118	1	0.380646	36.2196	26.9136	Other
NCU00188	0.230436	1	0.457154	41.5138	33.0296	Other
NCU00189	-1.01582	1	0.0567008	9.98623	16.9994	Other
NCU00192	0.0337726	1	1	30.8245	27.0804	Other
NCU00193	-0.28805	1	0.497205	25.4507	28.6392	Other
NCU00194	-0.1045	1	0.836524	27.9594	27.0093	Other
NCU00195	0.0885024	1	0.915024	26.7807	23.4136	Other
NCU00196	0.152869	1	0.757463	34.4427	28.6799	Other
NCU00198	-0.621214	1	0.162817	15.2737	21.5463	Other
NCU00199	0.250527	1	0.420051	41.8688	32.9395	Other
NCU00200	0.163718	1	0.705048	35.0639	28.6913	Other
NCU00201	-0.111961	1	0.758166	38.2819	37.2968	Other
NCU00202	0.391634	1	0.246809	42.437	29.5774	Other
NCU00203	0.280559	1	0.458922	35.166	26.8493	Other
NCU00204	0.201953	1	0.633228	31.5546	25.2317	Other
NCU00205	0.14796	1	0.642672	44.2703	36.6129	Other
NCU00206	0.152389	1	0.753802	33.8662	27.9529	Other
NCU00207	-0.113344	1	0.894049	26.2533	25.7019	Other
NCU00208	0.0594616	1	0.930565	39.8389	35.3772	Other
NCU00209	0.0892544	1	0.874339	37.9198	32.779	Other
NCU00210	0.0939632	1	0.802314	30.8502	26.6102	Other
NCU00211	0.0683245	1	0.980777	31.8755	28.6203	Other
NCU00212	-0.0200066	1	1	28.1578	26.5348	Other
NCU00213	0.207151	1	0.520585	37.7629	30.3076	Other
NCU00214	-0.069727	1	0.951856	20.6613	19.6039	Other
NCU00215	-0.173117	1	0.752654	22.4779	22.9657	Other
NCU00216	0.25278	1	0.533836	33.0312	24.9917	Other
NCU00218	-0.795505	1	0.110848	12.9559	20.1101	Other
NCU00219	0.306834	1	0.327106	45.3094	33.6847	Other
NCU00220	0.258614	1	0.553119	35.7483	27.5686	Other
NCU00221	0.00212531	1	1	35.6312	32.954	Other
NCU00222	0.336768	1	0.308594	42.2914	30.7141	Other
NCU00223	-0.192475	1	0.650087	25.3837	26.2851	Other
NCU00224	0.0293775	1	0.983024	41.8485	37.5279	Other
NCU00225	0.501859	1	0.132098	44.6978	27.7524	Other
NCU00226	-0.115206	1	0.77555	26.9828	26.9118	Other
NCU00227	-0.00651898	1	1	25.45	22.6824	Other
NCU00230	0.144099	1	0.760966	35.3079	29.5539	Other
NCU00231	-0.0810109	1	0.839345	29.3531	27.867	Other
NCU00232	0.221203	1	0.600217	35.3386	27.7329	Other
NCU00233	-0.219419	1	0.728252	17.2451	19.101	Other
NCU00234	-0.0867746	1	0.83355	26.3459	25.9571	Other
NCU00236	-0.329372	1	0.441723	19.8418	22.5012	Other
NCU00237	-0.0663512	1	0.957691	26.9421	25.7973	Other
NCU00238	0.0520096	1	1	27.0076	24.172	Other
NCU00239	0.365161	1	0.253084	43.4239	30.9644	Other
NCU00240	-0.239183	1	0.526675	22.8255	25.0814	Other
NCU00241	0.319713	1	0.345844	42.6973	31.359	Other
NCU00242	0.211783	1	0.570201	39.2509	30.5895	Other
NCU00243	-0.130062	1	0.811493	21.1056	20.6704	Other
NCU00244	-0.558783	1	0.153926	17.129	23.151	Other
NCU00245	-0.131582	1	0.827079	25.5383	24.7205	Other
NCU00246	-0.507379	1	0.17232	21.6975	28.0231	Other
NCU00247	-0.948256	1	0.0884013	10.1262	16.5156	Other
NCU00249	-0.293023	1	0.517978	22.0699	24.7896	Other
NCU00250	-0.629719	1	0.143508	16.15	22.433	Other
NCU00251	-0.0372233	1	1	33.482	31.4226	Other
NCU00252	-0.267986	1	0.477609	29.3003	32.1905	Other
NCU00253	-0.443132	1	0.278116	16.9168	21.2603	Other
NCU00254	-0.167742	1	0.677817	29.8942	31.0813	Other
NCU00257	0.18619	1	0.600217	34.7609	28.3216	Other
NCU00258	0.278005	1	0.363907	45.9137	34.7559	Other
NCU00259	-0.762859	1	0.110848	12.8774	19.9176	Other
NCU00260	-0.142605	1	0.767178	25.1243	25.4404	Other
NCU00261	0.156427	1	0.625541	40.9238	33.0741	Other
NCU00262	-0.644464	1	0.18472	15.0268	21.1437	Other
NCU00263	-0.0165975	1	1	28.9752	26.5468	Other
NCU00264	-0.416979	1	0.261837	22.316	26.8915	Other
NCU00265	-0.282841	1	0.437859	24.7768	27.0624	Other
NCU00267	-0.0356698	1	0.962945	34.7858	32.6925	Other
NCU00268	-0.321384	1	0.47161	22.954	25.8106	Other
NCU00269	0.109456	1	0.814247	35.7621	29.8234	Other
NCU00270	-0.277282	1	0.568031	21.8845	23.6851	Other
NCU00272	0.300445	1	0.352028	44.1148	32.842	Other
NCU00273	0.213172	1	0.496301	41.8315	32.9718	Other
NCU00274	0.17164	1	0.676352	40.5663	33.4436	Other
NCU00275	0.0508088	1	1	30.3757	26.8901	Other
NCU00276	0.152586	1	0.760966	36.1229	29.5388	Other
NCU00277	0.368729	1	0.349597	32.9154	23.3307	Other
NCU00278	-0.136634	1	0.823547	23.5383	23.5036	Other
NCU00279	0.14461	1	0.802314	30.0395	25.8398	Other
NCU00280	0.309119	1	0.401295	40.1014	29.5686	Other
NCU00281	0.224645	1	0.553119	36.1184	28.2473	Other
NCU00282	0.0362136	1	0.980469	31.5754	28.2791	Other
NCU00283	-0.267087	1	0.568031	21.0808	23.892	Other
NCU00284	0.155189	1	0.795415	27.5428	24.0032	Other
NCU00285	0.0324109	1	1	34.6928	30.6994	Other
NCU00287	-0.164227	1	0.650087	25.0137	25.8704	Other
NCU00289	-0.382537	1	0.375915	18.1507	21.4224	Other
NCU00290	-0.0612584	1	0.959912	29.3371	28.2435	Other
NCU00291	-0.491076	1	0.284653	14.6421	18.5462	Other
NCU00292	-0.0828782	1	0.897868	28.9089	27.5525	Other
NCU00293	-0.00225306	1	1	22.9662	20.5224	Other
NCU00294	0.106653	1	0.819456	38.3431	31.9445	Other
NCU00295	0.167695	1	0.638884	32.4411	26.5495	Other
NCU00296	-0.278262	1	0.534922	24.2608	26.5432	Other
NCU00297	-0.429879	1	0.181011	32.5089	40.0339	Other
NCU00298	0.0934519	1	0.913349	26.3396	22.464	Other
NCU00299	-0.462632	1	0.216097	20.9058	26.111	Other
NCU00300	-0.129581	1	0.78308	29.4527	29.2015	Other
NCU00301	0.136074	1	0.709208	37.2393	30.3725	Other
NCU00302	0.127829	1	0.849729	25.892	22.5029	Other
NCU00303	0.0142736	1	1	28.8434	25.9496	Other
NCU00304	-0.248936	1	0.61371	19.8869	21.897	Other
NCU00305	-0.428584	1	0.323759	20.8934	25.9287	Other
NCU00306	0.00555177	1	1	28.8184	26.7369	Other
NCU00307	-0.980975	1	0.0753092	9.30541	15.2869	Other
NCU00308	-0.156427	1	0.71532	27.0998	27.1077	Other
NCU00309	0.121502	1	0.860259	31.1143	26.002	Other
NCU00310	0.178566	1	0.700704	34.3448	27.6494	Other
NCU00311	0.318508	1	0.403774	34.3743	25.1221	Other
NCU00312	-0.336649	1	0.30625	27.5297	31.6827	Other
NCU00313	-0.204086	1	0.557305	27.0301	28.7952	Other
NCU00314	0.103427	1	0.826509	38.9264	34.474	Other
NCU00315	0.189628	1	0.603514	46.6821	37.1498	Other
NCU00316	-0.306709	1	0.499052	20.0943	22.4441	Other
NCU00317	0.0955214	1	0.860259	30.4735	26.343	Other
NCU00318	0.0752122	1	0.927739	37.6531	32.4913	Other
NCU00319	-0.356952	1	0.319819	24.6786	29.0617	Other
NCU00320	0.188273	1	0.599224	44.965	36.2382	Other
NCU00321	-0.126704	1	0.779412	28.6686	28.073	Other
NCU00322	-0.235603	1	0.557305	27.8609	29.3735	Other
NCU00324	0.221058	1	0.484705	39.2827	31.1824	Other
NCU00325	0.0805479	1	0.920868	31.2766	27.1491	Other
NCU00326	-0.109352	1	0.815781	21.4668	21.5241	Other
NCU00327	-0.973936	1	0.0666623	10.2358	18.3663	Other
NCU00329	-0.133282	1	0.823547	23.522	23.8697	Other
NCU00330	-0.0798214	1	0.899629	29.5876	28.4194	Other
NCU00331	0.0427725	1	0.981072	33.9883	30.2125	Other
NCU00332	0.3814	1	0.266837	39.8301	28.6599	Other
NCU00333	0.223863	1	0.594508	33.3916	26.724	Other
NCU00334	0.338556	1	0.35235	37.7613	27.9696	Other
NCU00335	0.432072	1	0.173112	42.0668	29.0088	Other
NCU00336	0.234437	1	0.508263	36.972	28.391	Other
NCU00337	0.200207	1	0.605691	36.8366	29.0189	Other
NCU00338	-0.116856	1	0.786572	30.9792	30.2246	Other
NCU00339	0.112477	1	0.781861	44.2454	36.5096	Other
NCU00340	0.30053	1	0.339487	42.0759	31.0019	Other
NCU00344	0.0868186	1	0.923371	33.4874	28.6693	Other
NCU00345	0.0849824	1	0.868846	35.0602	30.2701	Other
NCU00346	-0.0952375	1	0.827079	25.2063	24.1487	Other
NCU00347	0.195973	1	0.649456	34.502	27.9041	Other
NCU00348	0.104238	1	0.805511	31.7983	27.3662	Other
NCU00349	-0.146035	1	0.78308	29.4715	29.347	Other
NCU00350	0.0664613	1	0.870756	35.8191	31.2197	Other
NCU00351	-0.367166	1	0.359488	20.3717	24.1827	Other
NCU00352	0.167978	1	0.630053	41.7009	33.7823	Other
NCU00353	-0.867019	1	0.076739	12.0054	19.1376	Other
NCU00354	-0.806311	1	0.114254	10.9217	18.0883	Other
NCU00355	0.212152	1	0.564725	37.7363	30.0202	Other
NCU00356	0.0165536	1	1	26.1968	23.8341	Other
NCU00357	-0.119611	1	0.7899	32.1598	31.1105	Other
NCU00358	-0.176091	1	0.677817	31.3062	31.1701	Other
NCU00359	0.014831	1	1	32.8502	29.0151	Other
NCU00360	0.25158	1	0.5758	30.7788	24.208	Other
NCU00361	0.209953	1	0.5758	30.8946	24.5614	Other
NCU00362	0.026387	1	1	36.8326	33.4898	Other
NCU00363	0.0527274	1	0.927739	37.0311	32.9572	Other
NCU00364	-0.410672	1	0.392834	14.9516	19.0118	Other
NCU00366	0.110579	1	0.764322	37.1644	31.2652	Other
NCU00367	0.170836	1	0.625541	40.0873	32.9741	Other
NCU00368	0.158253	1	0.619396	49.5754	41.0822	Other
NCU00369	-0.0753013	1	0.90441	32.7017	31.2107	Other
NCU00370	0.289029	1	0.480504	31.6601	24.0129	Other
NCU00371	0.146767	1	0.745952	31.3431	26.4056	Other
NCU00372	0.19706	1	0.625541	40.6039	32.4108	Other
NCU00373	-0.0598225	1	0.961212	32.0605	30.1406	Other
NCU00375	-0.59422	1	0.20956	14.6109	19.7837	Other
NCU00376	-0.0335299	1	1	30.2101	28.3751	Other
NCU00377	-0.142849	1	0.830407	25.5437	25.8135	Other
NCU00378	0.0489384	1	0.91952	28.5536	26.5871	Other
NCU00379	-0.0316654	1	0.959912	30.3363	27.9964	Other
NCU00380	-0.0243194	1	1	36.9992	33.9765	Other
NCU00382	0.160876	1	0.616	39.0539	31.3245	Other
NCU00385	0.262533	1	0.487878	33.3253	25.4491	Other
NCU00386	0.00970774	1	1	30.2375	28.4192	Other
NCU00387	-0.213992	1	0.591542	24.7095	26.3316	Other
NCU00388	0.175935	1	0.676352	41.8768	33.3173	Other
NCU00389	0.103032	1	0.773599	39.258	34.0619	Other
NCU00391	-1.05618	1	0.0567008	9.50995	17.4597	Other
NCU00392	-0.121091	1	0.830407	26.4499	25.3187	Other
NCU00395	-0.2496	1	0.534922	24.4229	26.0934	Other
NCU00396	0.186631	1	0.59021	43.1523	34.7612	Other
NCU00397	-0.713845	1	0.096918	13.6846	20.4952	Other
NCU00398	-0.0111128	1	1	28.6028	26.2919	Other
NCU00399	-0.409175	1	0.375915	18.8205	21.8223	Other
NCU00400	0.0420943	1	1	26.0655	23.0398	Other
NCU00401	-0.0170627	1	1	31.4621	28.8592	Other
NCU00403	-0.188568	1	0.617656	28.4736	29.9795	Other
NCU00404	-0.0384928	1	1	31.867	30.3646	Other
NCU00405	0.0524808	1	1	31.8351	27.7307	Other
NCU00406	0.0787273	1	0.872585	37.3058	32.153	Other
NCU00407	-0.0653974	1	0.851541	33.6551	32.4953	Other
NCU00408	-0.248873	1	0.470325	28.5052	30.9873	Other
NCU00409	-0.0272016	1	0.961212	31.5448	29.8313	Other
NCU00410	0.106902	1	0.730941	42.5686	36.0209	Other
NCU00411	-0.12425	1	0.757793	22.935	23.0374	Other
NCU00412	0.338179	1	0.298134	45.8331	33.3042	Other
NCU00413	0.281801	1	0.344273	49.0495	36.5282	Other
NCU00414	0.177651	1	0.659151	36.6799	30.0425	Other
NCU00415	0.319055	1	0.303959	46.5766	34.4377	Other
NCU00416	0.26709	1	0.407942	47.5599	36.2421	Other
NCU00417	0.0820228	1	0.925651	35.8804	30.6412	Other
NCU00418	-0.00939173	1	1	36.6627	34.2799	Other
NCU00419	-0.0300723	1	0.962393	33.6701	31.7541	Other
NCU00420	0.0991601	1	0.91952	31.0346	25.9587	Other
NCU00421	0.484621	1	0.112579	45.4899	30.0373	Other
NCU00422	-0.0485976	1	0.905858	33.5409	31.6994	Other
NCU00423	0.189058	1	0.659151	36.7454	29.6872	Other
NCU00424	0.27677	1	0.370284	54.0279	40.7391	Other
NCU00425	0.417062	1	0.16451	54.6416	36.9416	Other
NCU00426	-0.179267	1	0.667536	28.5615	29.1688	Other
NCU00427	0.380778	1	0.217014	46.0961	32.8236	Other
NCU00428	0.15364	1	0.680261	40.7908	34.4859	Other
NCU00430	0.131265	1	0.730941	43.3124	35.6411	Other
NCU00431	0.19673	1	0.649456	34.8109	27.6607	Other
NCU00432	0.013906	1	1	30.5495	27.5964	Other
NCU00434	-0.126411	1	0.77555	26.8056	27.4208	Other
NCU00435	-0.301744	1	0.428782	23.1749	26.0725	Other
NCU00436	0.146415	1	0.724247	40.8221	33.6095	Other
NCU00437	0.118885	1	0.805511	32.1826	27.0219	Other
NCU00438	-0.224995	1	0.591542	25.5706	26.5884	Other
NCU00440	0.0747299	1	0.821902	38.424	33.1763	Other
NCU00441	-0.080757	1	0.839345	28.4122	27.7866	Other
NCU00442	0.0269427	1	1	34.0176	30.8372	Other
NCU00443	0.132627	1	0.757463	34.5072	29.2286	Other
NCU00444	-0.154722	1	0.771479	25.7456	26.4815	Other
NCU00445	0.0457233	1	1	32.3622	28.6736	Other
NCU00446	-0.385402	1	0.375915	18.2944	21.7047	Other
NCU00447	0.246968	1	0.46288	44.1427	33.6159	Other
NCU00448	0.136732	1	0.77063	38.6399	32.4663	Other
NCU00449	-0.250876	1	0.542754	25.9334	27.3171	Other
NCU00450	-0.000850055	1	1	31.7832	29.7046	Other
NCU00451	-0.404479	1	0.337084	18.6671	22.7294	Other
NCU00453	0.0938303	1	0.874339	38.2576	32.3878	Other
NCU00454	-0.0323367	1	0.960578	31.3881	28.8707	Other
NCU00455	0.117813	1	0.808558	32.6873	27.9837	Other
NCU00456	-0.656304	1	0.172012	13.9955	20.2298	Other
NCU00457	0.102092	1	0.808558	33.6314	28.3364	Other
NCU00458	-0.72198	1	0.145244	11.7977	17.9558	Other
NCU00459	0.268962	1	0.407942	47.4512	36.2219	Other
NCU00461	-0.125663	1	0.793077	32.2726	32.2511	Other
NCU00463	-0.20657	1	0.611598	27.5348	29.5373	Other
NCU00464	0.562137	0.892426	0.0190701	79.4497	48.3111	Other
NCU00465	0.190165	1	0.616	38.1361	30.9855	Other
NCU00466	0.0158953	1	1	33.9161	30.6511	Other
NCU00467	0.250857	1	0.438829	38.8217	30.2717	Other
NCU00468	0.044422	1	0.979067	26.7266	24.361	Other
NCU00469	0.11821	1	0.814247	35.2764	29.9321	Other
NCU00470	-0.072706	1	0.961212	31.2364	30.422	Other
NCU00471	-0.111966	1	0.83355	26.0697	26.4779	Other
NCU00472	-0.053699	1	0.855696	35.8243	34.3084	Other
NCU00473	-0.370408	1	0.359488	21.1334	24.2036	Other
NCU00474	-0.0181198	1	1	30.0082	28.794	Other
NCU00475	0.499222	1	0.065076	56.4653	36.6059	Other
NCU00476	0.00360407	1	1	25.3459	23.2272	Other
NCU00477	0.225758	1	0.53203	40.2368	31.7437	Other
NCU00478	0.0707587	1	0.924537	34.848	30.1117	Other
NCU00480	0.138489	1	0.684031	42.8643	35.7276	Other
NCU00481	-4.63295e-05	1	1	31.2871	29.3068	Other
NCU00483	-0.0184432	1	1	29.5326	27.0693	Other
NCU00484	-0.437702	1	0.375915	17.7757	22.0919	Other
NCU00486	-0.1434	1	0.699053	22.8837	24.0642	Other
NCU00487	-0.0607025	1	1	24.5978	23.7695	Other
NCU00488	0.301999	1	0.345844	41.9005	31.826	Other
NCU00489	0.33932	1	0.265222	46.1413	32.987	Other
NCU00490	0.00983264	1	1	31.4494	28.8542	Other
NCU00492	0.0982695	1	0.77063	38.2963	33.0884	Other
NCU00493	0.109482	1	0.874339	38.5	32.3098	Other
NCU00494	0.060749	1	0.879196	40.9823	35.9708	Other
NCU00495	0.218541	1	0.605691	35.9958	28.5237	Other
NCU00496	-0.426759	1	0.244252	24.2223	29.1029	Other
NCU00497	-0.107433	1	0.839345	28.3699	28.0884	Other
NCU00498	-0.0151173	1	1	30.4888	28.4356	Other
NCU00499	0.314514	1	0.337811	37.0654	26.5566	Other
NCU00501	0.0456237	1	0.981072	34.503	30.1105	Other
NCU00502	0.229114	1	0.51454	37.4467	29.3172	Other
NCU00503	-0.0335244	1	0.959211	28.9485	26.9283	Other
NCU00504	-0.0752589	1	0.844574	30.3225	29.6831	Other
NCU00505	0.339429	1	0.359283	38.4861	28.5434	Other
NCU00506	0.0884668	1	0.862562	30.856	27.5366	Other
NCU00509	-0.491194	1	0.17232	21.7651	28.1055	Other
NCU00512	-0.0513226	1	1	26.7564	25.5416	Other
NCU00513	0.0106036	1	1	24.218	21.9198	Other
NCU00515	0.107388	1	0.811467	33.7252	29.1294	Other
NCU00517	0.179398	1	0.610948	36.8345	30.3717	Other
NCU00518	-0.120748	1	0.830407	25.3873	25.2772	Other
NCU00519	-0.224552	1	0.655909	18.029	18.9013	Other
NCU00520	0.2664	1	0.390984	44.3091	33.881	Other
NCU00521	-0.0377763	1	1	25.1889	23.7171	Other
NCU00522	0.315612	1	0.403774	33.7006	25.2511	Other
NCU00523	0.0272581	1	1	29.8557	26.875	Other
NCU00524	-0.0793167	1	0.847004	31.8874	30.6666	Other
NCU00525	-0.123221	1	0.76117	39.7073	38.9399	Other
NCU00526	0.193578	1	0.659151	36.939	29.6077	Other
NCU00527	0.155389	1	0.717027	37.9407	31.4941	Other
NCU00528	0.133326	1	0.802314	31.7336	26.2541	Other
NCU00529	0.245405	1	0.384525	57.0375	43.7877	Other
NCU00530	0.304935	1	0.254955	59.6794	43.8799	Other
NCU00531	0.243373	1	0.396081	52.715	40.1584	Other
NCU00532	0.0314384	1	0.935347	45.7378	41.6335	Other
NCU00533	0.0822036	1	0.883529	44.1325	38.2477	Other
NCU00534	-0.524379	1	0.145589	21.3248	27.9718	Other
NCU00535	-0.485333	1	0.3216	13.8339	17.866	Other
NCU00536	0.0916718	1	0.849729	26.6077	22.6786	Other
NCU00537	-0.0852017	1	0.894049	25.589	25.2372	Other
NCU00538	0.197521	1	0.53203	40.1938	32.229	Other
NCU00541	0.348443	1	0.373288	36.128	25.6982	Other
NCU00542	-0.548776	1	0.208801	17.7386	22.6201	Other
NCU00545	0.169021	1	0.638884	32.9446	26.641	Other
NCU00547	-0.296483	1	0.407105	25.5446	28.7381	Other
NCU00548	-0.0456204	1	1	21.9006	21.6754	Other
NCU00549	-0.430016	1	0.363522	15.9223	20.7659	Other
NCU00550	0.173407	1	0.644288	33.6978	27.2424	Other
NCU00551	0.21707	1	0.517341	45.3769	36.1007	Other
NCU00552	0.193941	1	0.638884	31.2459	26.4172	Other
NCU00553	0.0292217	1	1	34.0807	30.5557	Other
NCU00554	0.210289	1	0.627297	30.8571	24.3488	Other
NCU00556	0.279763	1	0.438829	39.9297	29.5512	Other
NCU00558	-0.145258	1	0.677817	30.4465	30.5647	Other
NCU00559	-0.122409	1	0.771479	25.6749	25.9584	Other
NCU00560	-0.22176	1	0.559248	20.7643	22.1529	Other
NCU00561	-0.84883	1	0.0881763	11.6892	17.9088	Other
NCU00562	-0.00844018	1	1	26.3954	24.1344	Other
NCU00563	0.00180677	1	1	32.6674	29.9705	Other
NCU00564	0.294298	1	0.487878	33.3202	24.7661	Other
NCU00565	-0.011884	1	1	25.9489	24.0173	Other
NCU00566	-0.234646	1	0.576311	22.5881	24.073	Other
NCU00567	0.151204	1	0.700704	34.1052	28.1171	Other
NCU00568	-0.0747978	1	0.897868	28.1511	27.2405	Other
NCU00569	-0.271083	1	0.585575	16.7442	18.7829	Other
NCU00570	-0.312123	1	0.529309	17.7568	20.1292	Other
NCU00571	-0.0508949	1	1	25.8838	24.6741	Other
NCU00572	-0.0489244	1	1	19.371	18.2988	Other
NCU00573	0.198656	1	0.654405	35.681	28.6006	Other
NCU00574	-0.869331	1	0.134593	9.59874	15.1433	Other
NCU00575	-0.179235	1	0.643631	24.4446	25.0712	Other
NCU00576	-0.0926401	1	0.946288	16.373	16.1851	Other
NCU00577	0.00215431	1	1	31.4113	29.2781	Other
NCU00578	-0.459112	1	0.363176	13.7374	16.8766	Other
NCU00579	0.260885	1	0.451244	41.2118	31.499	Other
NCU00580	-0.00996605	1	1	27.0594	24.6882	Other
NCU00581	0.146786	1	0.732629	28.7073	23.7722	Other
NCU00582	-0.0463106	1	1	32.7502	30.4153	Other
NCU00584	-0.190981	1	0.672281	19.3585	20.4954	Other
NCU00585	0.116671	1	0.814247	34.476	29.7636	Other
NCU00586	-0.448278	1	0.3216	13.9579	17.6268	Other
NCU00587	0.174213	1	0.745952	31.4078	25.814	Other
NCU00589	0.173621	1	0.649456	34.8647	28.4267	Other
NCU00590	-0.149749	1	0.704781	25.3534	25.2477	Other
NCU00591	0.0776843	1	0.979804	28.9283	25.9865	Other
NCU00592	0.29293	1	0.451857	34.4219	25.9953	Other
NCU00593	0.0248066	1	0.981353	34.3487	31.2932	Other
NCU00595	-0.291052	1	0.568031	21.2577	23.9739	Other
NCU00596	-0.797905	1	0.0868459	12.9736	19.5974	Other
NCU00597	-0.0328667	1	0.958472	27.803	25.9278	Other
NCU00598	-0.113209	1	0.879373	19.6518	19.9335	Other
NCU00599	0.0601398	1	0.91952	30.2467	26.4617	Other
NCU00600	0.0741821	1	0.918102	28.6249	25.5176	Other
NCU00602	0.192418	1	0.686423	31.8516	25.1718	Other
NCU00603	0.203805	1	0.575476	38.9068	31.5767	Other
NCU00604	0.0826159	1	0.925651	35.227	30.4824	Other
NCU00605	0.215816	1	0.51454	35.9459	29.3515	Other
NCU00606	0.00753342	1	1	28.415	25.2962	Other
NCU00607	0.0641708	1	0.874339	39.0453	33.082	Other
NCU00608	0.0704531	1	0.92215	32.12	28.2844	Other
NCU00609	0.029163	1	1	26.9805	25.4587	Other
NCU00611	-0.166215	1	0.729207	29.7765	30.5354	Other
NCU00614	0.00417157	1	1	32.9183	30.6176	Other
NCU00616	-0.230419	1	0.679638	20.106	21.8984	Other
NCU00617	-0.130339	1	0.767178	25.2184	25.2472	Other
NCU00618	0.300704	1	0.327106	46.2995	33.7208	Other
NCU00619	0.0593097	1	0.979445	28.3581	25.1277	Other
NCU00620	0.273348	1	0.418552	36.5699	27.5286	Other
NCU00621	0.191012	1	0.570201	38.212	31.1281	Other
NCU00622	0.342695	1	0.27684	47.6417	34.4689	Other
NCU00623	-0.0630315	1	0.959912	30.0815	28.5559	Other
NCU00624	-0.0676811	1	0.836524	27.9088	26.7879	Other
NCU00627	0.11446	1	0.857835	30.2828	25.0552	Other
NCU00628	0.09043	1	0.92215	32.6561	27.8897	Other
NCU00629	0.411557	1	0.17593	47.9718	32.8809	Other
NCU00630	-0.0566048	1	1	22.071	21.0233	Other
NCU00631	0.0105451	1	1	32.0154	29.9857	Other
NCU00632	0.223209	1	0.526411	38.8381	30.7731	Other
NCU00633	0.214266	1	0.58232	32.319	25.4512	Other
NCU00634	0.414665	1	0.167747	50.1271	34.4643	Other
NCU00635	0.156869	1	0.753802	34.3934	27.792	Other
NCU00636	0.120377	1	0.819456	37.8858	31.5684	Other
NCU00638	-0.477772	1	0.241772	20.4632	25.8647	Other
NCU00640	0.216172	1	0.575476	39.8117	31.3375	Other
NCU00641	-0.293718	1	0.499052	18.8837	22.4392	Other
NCU00642	-0.184348	1	0.682613	31.3427	32.4108	Other
NCU00643	-0.0592583	1	1	21.9693	21.8049	Other
NCU00644	0.0567266	1	0.91952	30.3298	26.5606	Other
NCU00646	-0.623703	1	0.120212	17.9739	25.3666	Other
NCU00648	0.138567	1	0.764322	36.6362	30.7123	Other
NCU00649	-0.207118	1	0.643631	24.0541	25.4993	Other
NCU00650	0.174178	1	0.696163	33.8624	27.1082	Other
NCU00651	0.31867	1	0.372528	41.1688	30.4755	Other
NCU00652	0.0945682	1	0.826509	39.9718	34.783	Other
NCU00653	-0.062296	1	0.955988	24.4438	23.445	Other
NCU00654	-0.45852	1	0.301983	18.6944	24.0508	Other
NCU00655	0.146574	1	0.764322	37.0454	30.6638	Other
NCU00656	0.064991	1	0.980777	32.4169	28.8782	Other
NCU00657	0.234507	1	0.533836	31.7022	25.6077	Other
NCU00658	0.141848	1	0.730941	41.4935	35.1576	Other
NCU00659	-0.407979	1	0.38763	18.725	22.8298	Other
NCU00660	0.423717	1	0.173112	42.6063	29.2541	Other
NCU00662	-0.0405556	1	0.962945	34.4136	32.972	Other
NCU00663	0.0104594	1	1	24.7215	22.9908	Other
NCU00664	0.297713	1	0.411299	34.4397	26.3337	Other
NCU00665	0.12622	1	0.798953	29.324	25.2105	Other
NCU00666	-0.230662	1	0.559248	20.4649	22.1401	Other
NCU00667	0.167702	1	0.668085	38.628	31.9203	Other
NCU00668	0.291854	1	0.358047	45.1159	33.8576	Other
NCU00669	0.540348	1	0.10693	41.155	26.0685	Other
NCU00670	-0.213057	1	0.68652	21.2405	22.9932	Other
NCU00671	0.20571	1	0.594792	43.2523	35.0807	Other
NCU00673	0.234118	1	0.484705	39.5313	31.0943	Other
NCU00674	-0.121811	1	0.741242	32.1559	32.5444	Other
NCU00675	0.246654	1	0.51454	37.231	28.6671	Other
NCU00676	0.106829	1	0.90318	21.3077	17.9632	Other
NCU00677	-0.361765	1	0.343707	22.9996	27.4025	Other
NCU00678	-0.096652	1	0.894049	24.9655	25.551	Other
NCU00679	-0.0954822	1	0.827079	24.5575	24.1732	Other
NCU00680	0.27964	1	0.472806	29.863	23.5359	Other
NCU00681	0.231813	1	0.496301	42.2241	32.5962	Other
NCU00682	0.201407	1	0.600217	34.7457	27.9496	Other
NCU00684	-0.100336	1	0.78308	30.443	28.8663	Other
NCU00685	0.306737	1	0.338691	48.414	35.1968	Other
NCU00687	0.186923	1	0.644288	33.9729	27.1443	Other
NCU00688	-0.190751	1	0.710194	25.1856	26.6332	Other
NCU00689	0.213031	1	0.588549	33.6401	26.2758	Other
NCU00690	0.204893	1	0.553119	35.0968	28.3828	Other
NCU00691	0.0846991	1	0.85528	28.3806	24.5938	Other
NCU00692	0.259058	1	0.511841	29.9676	22.7045	Other
NCU00693	-0.0826178	1	0.839345	28.2719	27.8699	Other
NCU00694	-0.228829	1	0.591542	24.6881	26.3515	Other
NCU00695	-0.330741	1	0.499052	20.4681	23.0268	Other
NCU00696	-0.0692184	1	1	24.5984	22.8991	Other
NCU00697	-0.223946	1	0.591542	24.3848	26.176	Other
NCU00698	-0.131102	1	0.83355	25.6516	26.5662	Other
NCU00699	0.0974046	1	0.870756	35.5009	30.7577	Other
NCU00700	0.12847	1	0.757463	34.0189	29.1254	Other
NCU00701	-0.41865	1	0.313115	20.6881	24.8241	Other
NCU00704	-0.00124782	1	1	30.6417	27.9014	Other
NCU00705	-0.144325	1	0.779412	28.8169	28.5114	Other
NCU00706	0.397074	1	0.177383	52.6044	36.0922	Other
NCU00707	0.149622	1	0.745952	31.7788	26.1903	Other
NCU00708	0.127558	1	0.811467	34.0808	28.5658	Other
NCU00709	-0.0408459	1	0.960578	30.8772	29.004	Other
NCU00710	0.099551	1	0.846703	25.3391	21.6729	Other
NCU00711	0.207642	1	0.65042	24.8254	19.8629	Other
NCU00712	0.496787	1	0.107957	44.3758	29.037	Other
NCU00713	-0.173604	1	0.747174	21.4079	21.6409	Other
NCU00714	0.242809	1	0.490601	41.244	31.6144	Other
NCU00715	0.150803	1	0.717027	38.2117	31.7211	Other
NCU00716	-0.332799	1	0.389327	24.4011	27.1316	Other
NCU00717	0.125813	1	0.798953	30.9882	25.4515	Other
NCU00718	-0.683394	1	0.0902708	17.5947	24.1586	Other
NCU00719	-0.297589	1	0.508786	21.2109	23.3965	Other
NCU00720	0.153922	1	0.798953	30.6346	24.8684	Other
NCU00721	0.0558374	1	0.978666	25.9481	23.2651	Other
NCU00722	0.0848168	1	0.918102	29.1778	25.1051	Other
NCU00723	0.195838	1	0.616	37.4476	30.7999	Other
NCU00724	-0.117854	1	0.844574	30.7973	30.4341	Other
NCU00725	0.290521	1	0.387758	37.0885	28.209	Other
NCU00726	-0.308826	1	0.539952	18.4374	20.907	Other
NCU00727	0.14107	1	0.802314	31.3644	25.7963	Other
NCU00728	-0.0681374	1	0.957691	26.5183	25.5038	Other
NCU00729	-0.714531	1	0.145244	12.0515	17.8599	Other
NCU00730	-0.158667	1	0.704781	24.914	24.9403	Other
NCU00732	0.034193	1	1	32.5737	28.6821	Other
NCU00733	-0.401168	1	0.253061	24.0746	29.904	Other
NCU00734	0.0803766	1	0.918102	29.3332	25.3175	Other
NCU00735	-0.0849351	1	0.9493	18.9234	18.0146	Other
NCU00736	-0.159951	1	0.752654	21.3606	22.3454	Other
NCU00737	0.00110281	1	1	23.5558	21.5886	Other
NCU00738	0.13607	1	0.805511	31.8681	26.8499	Other
NCU00739	0.0868192	1	0.925651	35.6276	30.5584	Other
NCU00740	0.00183423	1	1	29.7897	27.3851	Other
NCU00741	-0.182792	1	0.757793	23.6773	23.749	Other
NCU00742	-0.0564904	1	0.955055	24.3908	22.3859	Other
NCU00743	0.268845	1	0.396793	45.5504	34.58	Other
NCU00744	0.100559	1	0.915024	27.1592	23.1183	Other
NCU00745	-0.300694	1	0.343892	33.0704	36.3466	Other
NCU00746	0.000745671	1	1	35.1094	32.1805	Other
NCU00747	-0.165604	1	0.691596	32.9048	34.2355	Other
NCU00748	-0.574115	1	0.18472	15.4017	20.4704	Other
NCU00749	0.213553	1	0.605691	36.1489	28.6688	Other
NCU00751	-0.716314	1	0.106906	14.8561	21.508	Other
NCU00752	0.376278	1	0.288574	39.7495	27.8673	Other
NCU00753	0.0576578	1	1	23.7475	20.4469	Other
NCU00754	-0.0497652	1	0.902893	31.4742	29.6573	Other
NCU00755	0.0192198	1	1	26.8398	24.7067	Other
NCU00756	-0.792941	1	0.0995742	12.3171	18.9774	Other
NCU00757	0.166285	1	0.668085	39.0638	31.5648	Other
NCU00758	-0.0580874	1	0.960578	30.3918	29.4259	Other
NCU00759	-0.000492356	1	1	27.218	24.7317	Other
NCU00760	-1.06478	1	0.0869671	8.27971	14.6742	Other
NCU00761	-0.691469	1	0.132844	15.263	21.9076	Other
NCU00762	-0.37581	1	0.333947	22.2393	26.3503	Other
NCU00763	0.198127	1	0.564725	38.0296	30.2693	Other
NCU00764	0.116864	1	0.76754	37.8519	31.7942	Other
NCU00765	0.222542	1	0.564725	37.3048	29.7935	Other
NCU00766	-0.369976	1	0.440018	15.2111	17.8402	Other
NCU00768	-0.00154782	1	1	29.639	26.5661	Other
NCU00770	0.209779	1	0.580561	40.764	32.3616	Other
NCU00771	0.229847	1	0.540537	33.1157	26.4348	Other
NCU00772	0.253978	1	0.51454	37.1064	28.5198	Other
NCU00773	-0.163777	1	0.704781	24.6982	25.3268	Other
NCU00774	-0.215511	1	0.636805	23.1021	24.4271	Other
NCU00775	0.266948	1	0.480504	31.6787	24.6528	Other
NCU00776	0.327898	1	0.314924	43.251	31.6111	Other
NCU00777	0.276728	1	0.425549	36.921	28.0359	Other
NCU00778	0.178237	1	0.663707	37.189	30.6299	Other
NCU00779	0.25915	1	0.407942	46.4115	36.2738	Other
NCU00780	-0.339941	1	0.529309	17.8453	19.9848	Other
NCU00781	-0.185953	1	0.55632	34.2095	36.3617	Other
NCU00782	0.134471	1	0.760966	36.0114	30.0949	Other
NCU00783	0.0236111	1	1	12.5637	11.4075	Other
NCU00784	0.0371085	1	0.980469	31.8805	28.4203	Other
NCU00786	-0.153941	1	0.667536	28.1443	28.8512	Other
NCU00787	-0.829972	1	0.0668439	12.5067	19.7275	Other
NCU00788	-0.213296	1	0.568031	21.3971	23.0773	Other
NCU00789	0.172356	1	0.700704	34.4373	27.8739	Other
NCU00790	0.211881	1	0.526411	38.7848	31.0913	Other
NCU00792	0.197815	1	0.638884	32.4997	26.14	Other
NCU00793	0.432311	1	0.152829	45.8436	31.7925	Other
NCU00794	-0.0187276	1	1	24.298	21.9447	Other
NCU00795	0.212475	1	0.605691	35.7651	28.9083	Other
NCU00796	0.274553	1	0.438829	38.923	29.7644	Other
NCU00797	-0.196027	1	0.656205	25.9877	27.2339	Other
NCU00798	0.153118	1	0.717027	37.9304	31.5185	Other
NCU00799	-0.0295612	1	0.960578	30.3404	28.6482	Other
NCU00800	-0.0368603	1	1	29.6319	28.2969	Other
NCU00801	-0.155768	1	0.704781	24.7628	25.1116	Other
NCU00802	-0.00153138	1	1	32.9825	29.9216	Other
NCU00803	-0.226169	1	0.504951	27.1292	28.7108	Other
NCU00805	0.117496	1	0.864756	32.6125	27.7089	Other
NCU00806	-0.234022	1	0.504032	32.7418	35.6721	Other
NCU00807	-0.179222	1	0.644205	33.3543	35.1584	Other
NCU00808	0.0848794	1	0.821902	37.9771	33.0582	Other
NCU00809	-0.0315001	1	1	30.6827	28.5235	Other
NCU00810	-0.013563	1	1	33.8223	31.6312	Other
NCU00811	-0.0624832	1	1	23.3075	21.9569	Other
NCU00812	0.0968414	1	0.85528	28.4555	24.3336	Other
NCU00813	-0.0739067	1	0.897868	27.4119	27.0826	Other
NCU00814	0.18299	1	0.659151	36.5336	29.768	Other
NCU00817	0.250919	1	0.391047	51.3904	39.5111	Other
NCU00818	-0.271515	1	0.489087	24.445	27.2787	Other
NCU00819	-0.953197	1	0.0666623	10.9448	18.0459	Other
NCU00821	-0.0163549	1	1	30.9972	28.199	Other
NCU00822	0.207476	1	0.62086	40.009	31.3869	Other
NCU00823	0.17733	1	0.605691	35.5317	29.2491	Other
NCU00824	0.351301	1	0.337811	36.4275	25.9697	Other
NCU00825	0.0285266	1	1	32.0927	28.9278	Other
NCU00826	-0.133324	1	0.741242	33.0905	32.7903	Other
NCU00827	0.268351	1	0.487878	33.7713	25.135	Other
NCU00828	0.023482	1	1	17.8776	16.064	Other
NCU00829	0.151776	1	0.757463	34.8776	28.7696	Other
NCU00830	-0.171748	1	0.767178	24.7994	25.8035	Other
NCU00831	0.0533748	1	0.978242	25.6912	22.5231	Other
NCU00832	-0.0731634	1	0.884921	21.8558	21.1492	Other
NCU00833	0.164385	1	0.625541	39.5802	32.8886	Other
NCU00834	-0.485316	1	0.216097	21.0231	26.3891	Other
NCU00835	-0.329398	1	0.441723	19.483	22.3915	Other
NCU00836	-0.378272	1	0.398727	20.3176	23.5321	Other
NCU00837	-0.0682515	1	0.955988	24.2301	23.6271	Other
NCU00838	-0.0615322	1	1	26.1878	24.7537	Other
NCU00839	-0.0773886	1	0.901301	31.2238	29.1488	Other
NCU00840	0.0138239	1	1	38.0837	34.7412	Other
NCU00841	0.0773912	1	0.816907	36.5206	31.3253	Other
NCU00842	-0.232514	1	0.532727	31.0022	33.1926	Other
NCU00843	0.108824	1	0.791683	27.55	23.7374	Other
NCU00844	-0.000322186	1	1	35.303	32.6472	Other
NCU00845	0.0781225	1	0.862562	31.5012	27.4076	Other
NCU00846	-0.102167	1	0.887422	23.2858	22.683	Other
NCU00847	0.132035	1	0.791683	27.6231	23.4199	Other
NCU00848	-0.398907	1	0.406224	16.1762	19.627	Other
NCU00849	-0.841782	1	0.0505802	15.0089	23.5631	Other
NCU00850	-0.227082	1	0.591542	25.4144	26.6143	Other
NCU00852	-0.00678763	1	1	29.7378	28.1777	Other
NCU00853	0.157256	1	0.642672	44.9403	36.6661	Other
NCU00854	-0.317464	1	0.441723	18.8441	22.1523	Other
NCU00855	-0.113206	1	0.896011	26.9455	26.7039	Other
NCU00856	0.096312	1	0.85528	27.6064	24.6447	Other
NCU00857	0.178216	1	0.700704	33.7375	27.5992	Other
NCU00859	0.0958109	1	0.85528	28.735	24.6851	Other
NCU00860	-0.0524488	1	0.958472	27.5967	26.3941	Other
NCU00861	-0.206656	1	0.662013	27.0408	28.5274	Other
NCU00862	0.0807715	1	0.85528	28.5734	24.6442	Other
NCU00863	0.104484	1	0.860259	30.3619	25.9873	Other
NCU00864	0.0523306	1	1	22.4819	20.2217	Other
NCU00865	0.0782918	1	0.979804	29.4183	25.8932	Other
NCU00866	0.17184	1	0.672296	40.7194	32.4815	Other
NCU00867	0.0347288	1	1	33.1009	28.9409	Other
NCU00868	-0.357109	1	0.3699	21.6371	25.5906	Other
NCU00869	0.0380941	1	0.925651	34.9897	31.3083	Other
NCU00870	0.135276	1	0.709208	36.4163	30.4045	Other
NCU00871	-0.372931	1	0.3699	21.61	25.6322	Other
NCU00872	-0.0215934	1	1	36.3251	34.1848	Other
NCU00873	-0.333545	1	0.370689	26.272	30.4569	Other
NCU00874	0.188131	1	0.62086	38.681	31.6113	Other
NCU00875	0.0294455	1	1	34.5478	31.6821	Other
NCU00876	0.250301	1	0.511841	29.1986	22.7684	Other
NCU00877	-0.229601	1	0.604976	18.835	20.5841	Other
NCU00878	-0.271561	1	0.549908	19.8929	21.806	Other
NCU00879	-0.00809985	1	1	31.5679	29.0886	Other
NCU00880	0.352979	1	0.314924	42.8171	31.2484	Other
NCU00881	0.00844531	1	1	29.6046	26.2056	Other
NCU00882	-0.411041	1	0.359488	20.6718	24.7571	Other
NCU00883	0.168319	1	0.654405	35.9794	28.9797	Other
NCU00884	0.427229	1	0.193619	40.672	28.9967	Other
NCU00885	-0.0596915	1	0.853663	34.9922	33.4088	Other
NCU00886	-0.404525	1	0.337084	18.6067	22.5575	Other
NCU00887	-0.100274	1	0.830407	24.8867	25.4125	Other
NCU00889	0.163661	1	0.745952	31.8962	25.8925	Other
NCU00890	0.143788	1	0.696163	32.1394	27.4838	Other
NCU00891	0.222251	1	0.540537	32.4808	26.3394	Other
NCU00892	0.144432	1	0.808558	33.5981	27.7415	Other
NCU00893	0.0829035	1	0.860259	30.9597	26.3413	Other
NCU00894	0.388381	1	0.238875	37.6771	25.6146	Other
NCU00895	0.124703	1	0.862562	31.7374	26.8438	Other
NCU00896	0.292623	1	0.432303	38.6963	28.7642	Other
NCU00897	0.167796	1	0.668085	38.3476	31.885	Other
NCU00898	-0.249198	1	0.568031	21.0822	23.4163	Other
NCU00899	0.0949085	1	0.860259	30.5837	26.3807	Other
NCU00900	0.31438	1	0.418552	36.3331	26.715	Other
NCU00901	0.245476	1	0.407942	45.8944	36.6732	Other
NCU00902	-0.157666	1	0.767178	24.4592	25.4564	Other
NCU00903	0.221491	1	0.61452	28.3597	22.5954	Other
NCU00904	0.158625	1	0.696163	33.0705	27.1439	Other
NCU00905	0.272732	1	0.436869	32.7451	24.6209	Other
NCU00906	-0.106038	1	0.823547	23.6623	23.4	Other
NCU00911	-0.172631	1	0.667536	28.3647	29.0515	Other
NCU00912	-0.309761	1	0.370689	25.7704	29.7946	Other
NCU00913	0.00892559	1	1	31.461	28.2647	Other
NCU00914	0.222204	1	0.53203	40.6301	31.5218	Other
NCU00915	0.0623789	1	0.876022	40.7187	33.9348	Other
NCU00916	0.208567	1	0.570201	39.0207	30.6886	Other
NCU00917	0.191487	1	0.649456	34.1637	27.9325	Other
NCU00918	-0.104548	1	0.827079	25.389	24.4284	Other
NCU00919	0.40597	1	0.222244	43.9549	29.7909	Other
NCU00920	0.155615	1	0.680261	41.1673	34.4014	Other
NCU00921	0.0905606	1	0.819456	36.3814	32.1202	Other
NCU00923	-0.110291	1	0.844574	31.5758	30.4658	Other
NCU00924	0.010349	1	1	30.6079	27.3044	Other
NCU00925	0.109231	1	0.814247	35.8323	30.0893	Other
NCU00926	0.178056	1	0.616	38.0543	31.2628	Other
NCU00927	0.314332	1	0.267806	50.5485	37.7554	Other
NCU00928	0.0309259	1	1	26.6801	24.8855	Other
NCU00929	0.100122	1	0.814247	35.1292	30.2139	Other
NCU00930	-0.414586	1	0.29129	22.0351	26.5059	Other
NCU00931	0.208742	1	0.559036	36.8724	29.3854	Other
NCU00932	0.102149	1	0.830776	41.7197	36.2123	Other
NCU00934	-0.795029	1	0.150801	10.3143	16.4961	Other
NCU00935	0.443599	1	0.173112	42.5355	28.928	Other
NCU00936	0.0353294	1	1	29.3638	26.2376	Other
NCU00937	-0.261527	1	0.542754	25.216	27.3226	Other
NCU00938	0.01144	1	1	34.5858	31.1718	Other
NCU00939	0.180908	1	0.634407	42.3259	34.2912	Other
NCU00940	-0.905423	1	0.101415	10.3932	17.5176	Other
NCU00941	-0.0106209	1	1	28.8643	26.7532	Other
NCU00943	-0.179595	1	0.656205	26.5082	27.1481	Other
NCU00944	-0.13093	1	0.83355	27.0029	26.6945	Other
NCU00945	0.20732	1	0.53203	39.6588	31.9993	Other
NCU00946	-0.668789	1	0.0647057	21.4639	29.9479	Other
NCU00947	-0.325898	1	0.370689	26.6008	30.1929	Other
NCU00949	0.148873	1	0.6466	45.119	37.4567	Other
NCU00950	0.154217	1	0.741734	31.2274	25.1512	Other
NCU00951	0.0253967	1	1	25.722	23.3083	Other
NCU00952	-0.0431302	1	0.897868	27.2994	26.7701	Other
NCU00953	-0.14148	1	0.779412	28.5031	28.2699	Other
NCU00954	-0.048325	1	0.959912	29.9899	28.2899	Other
NCU00955	0.0716372	1	0.925651	35.3769	30.995	Other
NCU00956	-0.174986	1	0.699053	23.1061	24.4815	Other
NCU00957	-0.144783	1	0.83355	26.3849	26.7771	Other
NCU00958	-0.164255	1	0.704781	25.1354	25.0272	Other
NCU00959	-0.284539	1	0.534922	25.9421	26.7389	Other
NCU00960	0.0198094	1	1	38.3077	32.87	Other
NCU00962	0.229836	1	0.473816	44.9779	35.4191	Other
NCU00963	-0.0305586	1	1	26.5831	24.8122	Other
NCU00964	0.110908	1	0.826509	39.8317	34.2402	Other
NCU00965	0.328521	1	0.314924	42.8788	31.6729	Other
NCU00966	0.183485	1	0.616	37.9067	31.0262	Other
NCU00967	0.223626	1	0.484705	40.6157	31.2212	Other
NCU00968	-0.0176443	1	0.962393	34.0583	31.5137	Other
NCU00969	-0.0869698	1	0.894049	26.0411	25.4404	Other
NCU00970	0.326254	1	0.298134	46.188	33.735	Other
NCU00971	0.320998	1	0.278114	53.7238	39.0233	Other
NCU00972	-0.324614	1	0.499052	19.43	22.8423	Other
NCU00973	-0.0252238	1	0.957691	26.4734	24.9866	Other
NCU00974	-0.281696	1	0.480566	23.3259	26.0993	Other
NCU00975	-0.0423604	1	0.962945	34.3734	32.6715	Other
NCU00976	-0.0553574	1	0.896011	27.577	25.9623	Other
NCU00977	0.177057	1	0.7373	29.541	23.8865	Other
NCU00978	0.298816	1	0.363907	46.2278	34.2849	Other
NCU00979	0.394786	1	0.138924	61.452	41.9285	Other
NCU00980	0.183426	1	0.610948	37.1079	30.1386	Other
NCU00981	0.161732	1	0.713197	37.8654	30.4904	Other
NCU00983	0.205276	1	0.553119	35.2783	28.2657	Other
NCU00984	-0.208554	1	0.570556	30.0739	31.0153	Other
NCU00985	0.219857	1	0.442567	47.3148	36.8176	Other
NCU00986	0.186861	1	0.552672	44.4923	35.8511	Other
NCU00987	-0.0224672	1	1	34.7177	32.1201	Other
NCU00988	0.246375	1	0.49495	33.943	26.3576	Other
NCU00990	-0.441949	1	0.259159	18.8158	23.1738	Other
NCU00992	-0.548601	1	0.208801	17.4605	22.6358	Other
NCU00993	0.0578273	1	0.916606	28.2135	24.7377	Other
NCU00994	-0.0768154	1	0.955988	25.0943	23.9214	Other
NCU00998	0.140645	1	0.76754	38.1168	31.365	Other
NCU00999	-0.103529	1	0.894049	26.2991	25.7701	Other
NCU01000	0.151884	1	0.724247	40.6146	33.5347	Other
NCU01001	0.0591441	1	0.913349	26.9016	22.7527	Other
NCU01002	0.00898321	1	1	25.3188	22.5575	Other
NCU01003	-0.975148	1	0.0579814	11.625	19.1927	Other
NCU01004	0.203615	1	0.654405	36.0246	28.5227	Other
NCU01005	-0.319082	1	0.362054	25.7115	28.8517	Other
NCU01006	0.172258	1	0.659151	37.2239	29.9953	Other
NCU01007	0.188471	1	0.681189	30.7527	24.4023	Other
NCU01008	0.0391004	1	0.979804	30.4032	26.5737	Other
NCU01009	-0.0317533	1	1	31.4252	29.4773	Other
NCU01011	0.170687	1	0.696163	33.233	27.2462	Other
NCU01012	0.0998279	1	0.824251	39.7016	33.7093	Other
NCU01013	-0.105393	1	0.771479	27.2211	25.9271	Other
NCU01014	-0.305696	1	0.360863	29.7233	33.945	Other
NCU01015	0.101078	1	0.862562	32.2299	27.2678	Other
NCU01016	0.11531	1	0.862562	31.546	26.7222	Other
NCU01017	0.203532	1	0.638884	33.2042	26.2413	Other
NCU01019	0.165756	1	0.717027	38.6261	31.3694	Other
NCU01021	0.283527	1	0.464759	30.6328	22.7942	Other
NCU01022	0.287499	1	0.425549	37.8934	27.959	Other
NCU01023	0.231517	1	0.627297	30.7745	23.9144	Other
NCU01024	0.370612	1	0.253207	39.1535	27.4042	Other
NCU01025	0.189209	1	0.515956	52.9806	43.8817	Other
NCU01026	0.0360317	1	0.981353	34.1743	31.0537	Other
NCU01027	0.227041	1	0.58232	31.7305	25.3484	Other
NCU01032	-0.0884267	1	0.891972	25.629	24.6309	Other
NCU01033	0.191079	1	0.654405	35.6876	28.8274	Other
NCU01034	-0.834078	1	0.076739	11.9494	18.8351	Other
NCU01036	0.175488	1	0.634407	42.6163	34.3644	Other
NCU01038	0.293115	1	0.325965	51.2293	38.0411	Other
NCU01039	0.0181194	1	1	41.7092	37.3381	Other
NCU01041	-0.0736875	1	0.959912	29.9879	28.6064	Other
NCU01042	-0.247199	1	0.465505	34.1502	36.8872	Other
NCU01043	0.0801521	1	0.828682	41.5213	36.0246	Other
NCU01044	-0.0164271	1	0.956865	26.165	23.927	Other
NCU01045	-0.273018	1	0.646747	16.5188	18.0651	Other
NCU01047	0.224425	1	0.542698	42.5611	33.2162	Other
NCU01048	0.0218175	1	1	37.3982	33.961	Other
NCU01049	0.0482189	1	0.923371	33.2203	29.4237	Other
NCU01050	0.28033	1	0.487878	34.2334	25.084	Other
NCU01051	-0.16596	1	0.588383	32.9937	33.4223	Other
NCU01052	0.129973	1	0.77063	38.5444	32.5971	Other
NCU01053	-0.189306	1	0.677817	29.8493	31.3698	Other
NCU01054	-0.309773	1	0.437859	23.9526	27.1336	Other
NCU01055	-0.338182	1	0.38763	19.0021	22.203	Other
NCU01056	-0.717366	1	0.0721617	16.4469	24.3889	Other
NCU01057	-0.288733	1	0.517978	22.1439	24.4933	Other
NCU01058	0.0263029	1	1	35.5749	32.4039	Other
NCU01059	0.0475338	1	0.91952	30.1556	26.7001	Other
NCU01060	-0.635824	1	0.114088	19.8319	27.8268	Other
NCU01061	0.176696	1	0.700704	33.9852	27.8579	Other
NCU01063	-0.472582	1	0.290329	19.0641	22.6301	Other
NCU01064	-0.415756	1	0.323759	21.4242	25.7848	Other
NCU01065	-0.027354	1	1	28.3032	26.475	Other
NCU01066	0.0263734	1	0.978666	27.0459	23.7971	Other
NCU01067	0.134244	1	0.749969	32.3757	27.1283	Other
NCU01068	0.136036	1	0.741734	31.0354	25.7056	Other
NCU01069	-0.00265475	1	1	29.4287	27.6427	Other
NCU01070	-0.263595	1	0.61371	19.5867	21.7522	Other
NCU01071	0.091776	1	0.852583	28.1044	23.5347	Other
NCU01072	-0.779368	1	0.131204	11.3252	16.6214	Other
NCU01073	-0.997319	1	0.0567008	9.3163	17.0395	Other
NCU01074	-0.796387	1	0.110848	12.6689	20.2898	Other
NCU01075	-0.241714	1	0.584135	24.2708	25.8026	Other
NCU01076	-0.68162	1	0.0647057	20.3796	30.2629	Other
NCU01077	-0.391221	1	0.253061	24.9975	29.7591	Other
NCU01078	-0.865401	1	0.0339139	16.3095	26.6702	Other
NCU01079	-0.326221	1	0.409254	22.407	24.3538	Other
NCU01080	-0.187805	1	0.692978	23.253	23.4186	Other
NCU01081	-0.318453	1	0.46218	21.1871	24.4253	Other
NCU01082	0.100173	1	0.870756	36.1767	30.5771	Other
NCU01083	0.148088	1	0.709208	37.0738	29.8363	Other
NCU01084	-0.155865	1	0.710194	25.9639	26.0637	Other
NCU01085	-0.00662894	1	1	30.9398	27.8388	Other
NCU01086	0.138105	1	0.7373	29.4772	24.5052	Other
NCU01087	0.353965	1	0.228087	49.5361	34.897	Other
NCU01088	-0.194489	1	0.801935	18.2836	19.0954	Other
NCU01089	0.0802406	1	0.872585	36.3881	31.9075	Other
NCU01090	0.0688189	1	0.925651	34.8102	30.9256	Other
NCU01091	0.0225812	1	1	35.2271	31.5636	Other
NCU01092	0.0266216	1	1	17.0562	15.585	Other
NCU01093	-0.262152	1	0.517978	21.8446	24.269	Other
NCU01094	0.0883586	1	0.857835	29.6014	25.5921	Other
NCU01095	0.0605423	1	0.978242	26.3627	22.2577	Other
NCU01097	-0.144017	1	0.724806	29.4733	28.8922	Other
NCU01098	0.195928	1	0.696163	33.6081	26.6805	Other
NCU01099	-0.111009	1	0.836524	28.3425	27.5947	Other
NCU01100	0.0633899	1	0.920868	31.0632	27.2036	Other
NCU01101	-0.479398	1	0.3216	14.2342	17.9417	Other
NCU01102	0.0430536	1	0.978242	25.668	22.9599	Other
NCU01103	-0.0430737	1	0.955988	24.7408	23.3644	Other
NCU01104	0.0959134	1	0.911571	25.6042	21.6137	Other
NCU01105	-0.078851	1	0.901301	30.0615	29.3536	Other
NCU01106	-0.0353906	1	1	23.9758	22.6191	Other
NCU01107	0.0481483	1	1	25.6569	23.047	Other
NCU01108	-0.57418	1	0.145401	18.9323	25.5984	Other
NCU01109	-0.332921	1	0.379835	23.2681	26.2199	Other
NCU01111	0.172273	1	0.709208	36.5497	29.6961	Other
NCU01112	-0.166865	1	0.672798	28.8645	30.0623	Other
NCU01113	-0.0686333	1	0.90441	31.3166	30.8348	Other
NCU01114	-0.240848	1	0.534922	24.1916	25.9286	Other
NCU01115	0.0670747	1	0.915024	27.4467	23.8696	Other
NCU01116	0.155671	1	0.791683	28.9979	23.2282	Other
NCU01118	0.0960789	1	0.918102	27.9354	25.0774	Other
NCU01119	0.07778	1	0.866848	32.9732	29.125	Other
NCU01120	0.0124295	1	1	36.6365	33.6315	Other
NCU01121	-0.263012	1	0.604976	19.5156	20.8895	Other
NCU01122	0.064565	1	0.923371	33.227	29.1656	Other
NCU01123	0.30675	1	0.327106	45.314	33.6718	Other
NCU01124	-0.315811	1	0.47161	22.3233	25.8654	Other
NCU01132	0.171458	1	0.659151	36.994	30.0251	Other
NCU01134	-0.0130663	1	1	35.2072	32.3082	Other
NCU01135	0.180587	1	0.607669	46.1526	37.9298	Other
NCU01136	-0.601518	1	0.174143	16.5152	22.6222	Other
NCU01138	-0.00678462	1	1	40.9676	37.8418	Other
NCU01140	0.0366205	1	1	32.8688	29.6881	Other
NCU01141	-0.0506745	1	1	24.8856	23.8305	Other
NCU01142	0.0315064	1	1	25.8795	23.0137	Other
NCU01143	0.170824	1	0.610948	37.5257	30.1852	Other
NCU01144	0.0423778	1	1	29.7372	26.062	Other
NCU01145	-0.0393774	1	0.959912	30.0734	27.809	Other
NCU01146	0.0773533	1	0.979067	27.8272	23.957	Other
NCU01147	-0.458187	1	0.325006	18.0035	21.8311	Other
NCU01148	-0.419845	1	0.271345	23.1147	28.2374	Other
NCU01149	-0.639607	1	0.136037	17.7366	24.7299	Other
NCU01150	0.194994	1	0.600217	35.4067	28.2547	Other
NCU01151	0.000946708	1	1	35.1092	32.1903	Other
NCU01154	0.294458	1	0.418552	35.5785	26.964	Other
NCU01156	-0.0165897	1	1	34.9279	31.7334	Other
NCU01157	0.0471635	1	0.925651	36.5414	31.3527	Other
NCU01158	0.107685	1	0.868846	34.6683	29.6005	Other
NCU01160	0.048951	1	0.91952	29.7169	26.5412	Other
NCU01161	0.155364	1	0.709208	35.5675	29.9042	Other
NCU01162	0.138637	1	0.713197	37.2027	31.1769	Other
NCU01163	-0.180122	1	0.617656	28.7482	30.0043	Other
NCU01164	0.1816	1	0.562024	46.1326	37.7462	Other
NCU01165	0.128957	1	0.77063	39.2243	32.5121	Other
NCU01166	0.0127741	1	1	32.38	29.265	Other
NCU01167	-0.193105	1	0.611598	27.3132	28.9231	Other
NCU01169	-0.166998	1	0.650087	26.0423	26.0218	Other
NCU01170	0.0955537	1	0.85528	29.4495	24.6905	Other
NCU01171	0.325885	1	0.319302	38.1223	28.3038	Other
NCU01172	0.314885	1	0.339487	41.5606	30.7056	Other
NCU01173	0.0350225	1	0.927739	37.0785	33.2747	Other
NCU01174	-0.0446153	1	0.961816	32.2797	31.1187	Other
NCU01175	0.191138	1	0.649456	34.219	28.1144	Other
NCU01176	0.102901	1	0.91952	29.242	25.8891	Other
NCU01177	-0.389297	1	0.29129	21.9267	26.0765	Other
NCU01178	0.0438137	1	0.981072	34.1837	29.9367	Other
NCU01179	-0.213388	1	0.656205	26.4696	27.6603	Other
NCU01180	0.0956678	1	0.816907	36.24	31.0617	Other
NCU01181	-0.145855	1	0.667536	28.2662	28.7031	Other
NCU01182	-0.302912	1	0.517978	21.9563	24.6797	Other
NCU01183	0.113551	1	0.808558	33.0599	28.3822	Other
NCU01184	0.168699	1	0.732629	27.7637	23.1909	Other
NCU01185	0.115962	1	0.832465	20.4981	18.0273	Other
NCU01186	0.240339	1	0.431637	44.7422	34.8576	Other
NCU01187	0.180734	1	0.625541	40.5413	32.8097	Other
NCU01188	-0.200706	1	0.62189	20.918	22.3633	Other
NCU01189	0.0644756	1	0.927739	37.2053	32.7099	Other
NCU01190	0.34095	1	0.349597	32.674	23.6519	Other
NCU01191	-0.501884	1	0.235413	17.108	21.5093	Other
NCU01192	0.187448	1	0.599224	43.4682	36.0671	Other
NCU01193	0.248569	1	0.46288	44.073	33.5409	Other
NCU01195	0.12604	1	0.77063	39.3036	32.4279	Other
NCU01196	0.182429	1	0.705048	35.4323	28.6019	Other
NCU01197	0.394202	1	0.196271	52.2579	36.079	Other
NCU01198	0.15848	1	0.659151	36.5134	30.3814	Other
NCU01199	0.113022	1	0.808558	33.1729	28.3772	Other
NCU01200	-0.0602184	1	0.959211	28.0824	27.529	Other
NCU01201	-0.162113	1	0.692978	22.592	23.1546	Other
NCU01202	0.110053	1	0.868846	34.4502	29.5529	Other
NCU01203	0.0365967	1	0.980145	30.4337	27.4038	Other
NCU01204	0.0832629	1	0.920868	31.3107	27.1113	Other
NCU01205	0.110989	1	0.866848	32.8891	28.5837	Other
NCU01206	0.235694	1	0.468432	43.9085	34.5112	Other
NCU01207	0.167185	1	0.642672	44.8872	36.4556	Other
NCU01208	-0.0415499	1	0.907243	34.5003	32.5643	Other
NCU01209	-0.0938312	1	0.80705	37.0304	36.4953	Other
NCU01210	0.0776566	1	0.880693	42.2211	36.6067	Other
NCU01211	-0.0089545	1	1	29.911	28.0927	Other
NCU01212	-0.136815	1	0.748428	34.3385	35.0171	Other
NCU01213	-0.347095	1	0.343707	23.693	26.9634	Other
NCU01214	-0.025256	1	1	35.9947	35.032	Other
NCU01215	-0.178679	1	0.662013	27.5928	28.1308	Other
NCU01216	0.119994	1	0.764322	36.8496	30.9828	Other
NCU01218	-0.150573	1	0.815781	21.6171	21.7472	Other
NCU01219	0.150088	1	0.798953	28.6989	24.9999	Other
NCU01220	-0.228407	1	0.542754	25.424	26.8602	Other
NCU01221	0.493703	1	0.0763493	57.8625	37.2171	Other
NCU01223	-0.284026	1	0.386985	27.769	31.7216	Other
NCU01224	0.247614	1	0.46288	43.3064	33.5175	Other
NCU01225	-0.0294497	1	1	26.5861	24.8523	Other
NCU01227	0.229878	1	0.508263	36.0689	28.1868	Other
NCU01229	0.00394042	1	1	33.6803	30.8914	Other
NCU01230	-0.0345311	1	1	31.5022	29.0974	Other
NCU01231	-0.17757	1	0.677817	30.077	31.4245	Other
NCU01233	-0.0135367	1	1	28.7551	26.712	Other
NCU01234	0.126415	1	0.816907	35.5586	30.6124	Other
NCU01235	0.188215	1	0.634407	42.0395	34.1375	Other
NCU01236	-0.569312	1	0.208801	17.2983	23.1327	Other
NCU01238	0.215783	1	0.484117	47.5088	37.3662	Other
NCU01240	-0.0584954	1	0.901301	29.998	28.687	Other
NCU01241	0.130563	1	0.76754	37.5042	31.7425	Other
NCU01242	0.0528082	1	0.981622	34.3555	31.8819	Other
NCU01243	0.360078	1	0.253084	42.25	30.9946	Other
NCU01245	0.320915	1	0.326224	39.9138	29.1217	Other
NCU01246	-0.677586	1	0.12685	12.9176	18.4795	Other
NCU01247	0.298484	1	0.338691	47.4442	35.339	Other
NCU01248	0.223857	1	0.564725	36.7631	29.5907	Other
NCU01249	0.115206	1	0.819456	37.218	31.6484	Other
NCU01250	0.0473529	1	0.980777	32.9632	29.227	Other
NCU01252	0.203654	1	0.575476	39.4057	31.849	Other
NCU01253	-0.18826	1	0.636805	23.2393	24.2064	Other
NCU01254	0.248986	1	0.62107	29.4557	22.9926	Other
NCU01255	0.129659	1	0.720707	39.9683	33.0905	Other
NCU01256	0.15409	1	0.668085	38.0368	31.9971	Other
NCU01257	0.230651	1	0.588549	33.7273	25.9589	Other
NCU01258	-0.173527	1	0.643631	23.7125	25.0203	Other
NCU01259	0.164041	1	0.696163	32.1791	27.0544	Other
NCU01260	0.133552	1	0.676352	40.7603	34.1094	Other
NCU01261	0.0691864	1	0.876022	39.4759	34.0905	Other
NCU01262	0.0369666	1	1	38.6612	34.3725	Other
NCU01266	-0.0258518	1	1	33.5736	31.2394	Other
NCU01267	0.0653033	1	0.981072	33.9107	29.7357	Other
NCU01268	-0.0384075	1	0.901301	30.1365	28.6401	Other
NCU01269	0.0701608	1	0.928719	38.5024	33.4707	Other
NCU01270	-0.251911	1	0.568031	21.2974	23.2712	Other
NCU01271	0.38229	1	0.201022	49.1437	33.5988	Other
NCU01272	0.0971721	1	0.816907	36.0584	31.1984	Other
NCU01273	0.27356	1	0.47228	37.6822	28.8744	Other
NCU01274	-0.0479966	1	1	32.8975	31.3961	Other
NCU01275	-0.0697751	1	1	20.6087	20.0472	Other
NCU01276	-0.0747137	1	0.959211	27.9923	27.5039	Other
NCU01277	0.0617139	1	0.91952	30.2645	26.3562	Other
NCU01278	0.180718	1	0.58547	41.6532	33.9824	Other
NCU01279	-0.104093	1	0.78308	29.1754	28.7231	Other
NCU01281	0.00541483	1	1	37.8157	34.1566	Other
NCU01282	0.136009	1	0.745952	31.8213	26.4579	Other
NCU01283	0.157402	1	0.654083	48.4788	39.0802	Other
NCU01284	0.23515	1	0.588549	34.0208	25.7889	Other
NCU01285	0.104986	1	0.866848	33.6786	28.9016	Other
NCU01288	0.256097	1	0.407942	47.3631	36.5511	Other
NCU01289	-0.16731	1	0.762624	24.9405	24.8915	Other
NCU01290	0.225363	1	0.570201	39.8786	30.4098	Other
NCU01291	0.194567	1	0.654405	35.5749	28.7282	Other
NCU01292	-0.206245	1	0.570556	29.3642	30.9742	Other
NCU01294	-0.0578277	1	0.962945	34.3787	33.0941	Other
NCU01296	-0.146525	1	0.71532	26.3198	26.9147	Other
NCU01297	-0.229428	1	0.591542	24.4424	26.2206	Other
NCU01298	-0.108302	1	0.823547	23.7089	23.5262	Other
NCU01299	-0.787733	1	0.0721617	16.0533	24.985	Other
NCU01300	-0.336322	1	0.505617	15.3826	17.8037	Other
NCU01301	0.0369963	1	1	31.1652	27.7902	Other
NCU01302	-0.270121	1	0.526675	23.2382	25.419	Other
NCU01303	0.0501538	1	0.923371	32.6177	29.2477	Other
NCU01304	0.261197	1	0.369616	46.6791	35.7843	Other
NCU01305	0.0749587	1	0.868846	34.3293	30.2119	Other
NCU01306	-0.0891477	1	0.90441	32.4502	31.3578	Other
NCU01307	-0.137294	1	0.720183	27.6135	27.7281	Other
NCU01309	-0.0974815	1	0.83355	26.2189	26.048	Other
NCU01310	0.318392	1	0.308594	42.2134	31.0205	Other
NCU01311	-0.0345227	1	0.961816	33.0015	30.9036	Other
NCU01312	-0.29675	1	0.407105	25.3081	28.7271	Other
NCU01314	-0.758734	1	0.0721617	16.7361	24.7252	Other
NCU01315	0.195927	1	0.540295	50.4139	40.7785	Other
NCU01317	0.521185	1	0.065076	57.7191	36.2893	Other
NCU01318	0.39346	1	0.234329	45.1005	31.4625	Other
NCU01319	0.12187	1	0.76754	38.6571	32.074	Other
NCU01320	-0.164563	1	0.762624	25.0985	24.9141	Other
NCU01321	-0.249575	1	0.636805	22.7517	24.9303	Other
NCU01322	0.196323	1	0.686423	30.7798	24.8657	Other
NCU01323	0.210787	1	0.557421	45.1822	36.1619	Other
NCU01324	0.242151	1	0.533836	32.2561	25.5586	Other
NCU01325	0.0300365	1	1	40.216	37.1118	Other
NCU01326	0.151097	1	0.687671	42.5816	36.3142	Other
NCU01327	0.43088	1	0.17593	47.5742	32.3915	Other
NCU01328	0.209507	1	0.526411	39.1391	31.1289	Other
NCU01329	-0.273751	1	0.542754	25.2464	27.7666	Other
NCU01330	0.0948351	1	0.830776	42.2136	36.3975	Other
NCU01331	0.135646	1	0.741734	31.4638	25.7046	Other
NCU01332	0.266077	1	0.442567	46.063	35.983	Other
NCU01333	0.315396	1	0.418552	36.1518	26.6319	Other
NCU01334	-0.400503	1	0.38763	19.5208	22.8915	Other
NCU01335	0.21798	1	0.542698	41.967	33.3719	Other
NCU01336	0.0958642	1	0.913349	26.2385	22.4179	Other
NCU01337	-0.32065	1	0.441723	19.4609	22.3302	Other
NCU01338	0.149491	1	0.659151	37.3071	30.3392	Other
NCU01339	0.0395099	1	0.920868	31.1836	27.6267	Other
NCU01340	-0.238068	1	0.584135	23.0502	25.3752	Other
NCU01341	0.256264	1	0.508263	35.949	27.6728	Other
NCU01342	0.136496	1	0.814247	35.504	29.6002	Other
NCU01343	0.264103	1	0.458922	35.3807	27.374	Other
NCU01344	0.364035	1	0.240191	45.8354	32.7888	Other
NCU01345	0.263071	1	0.47228	38.0741	28.8316	Other
NCU01347	-0.225793	1	0.576311	22.3274	24.2079	Other
NCU01348	0.0714861	1	0.870756	35.6277	31.0609	Other
NCU01349	0.176329	1	0.616	38.4622	30.9533	Other
NCU01350	-0.193546	1	0.605243	27.9766	28.1543	Other
NCU01351	0.0927882	1	0.918102	29.497	24.8598	Other
NCU01353	0.229036	1	0.478602	39.0217	30.3112	Other
NCU01355	-0.419286	1	0.301983	19.4716	23.5343	Other
NCU01356	-0.244396	1	0.489087	25.5626	26.9747	Other
NCU01357	-0.0132954	1	0.961816	31.6786	30.5119	Other
NCU01358	0.255305	1	0.385888	49.3184	38.3052	Other
NCU01360	0.078716	1	0.924537	33.899	29.5872	Other
NCU01361	0.113635	1	0.77063	38.9043	32.8305	Other
NCU01362	0.16264	1	0.630053	40.8812	33.7462	Other
NCU01364	-0.411988	1	0.29129	22.3579	26.3639	Other
NCU01365	0.0442857	1	0.92966	38.7197	35.079	Other
NCU01366	0.206851	1	0.59021	42.406	34.1814	Other
NCU01367	0.408996	1	0.193619	42.9355	29.2298	Other
NCU01368	0.190126	1	0.649456	34.2657	27.9786	Other
NCU01369	0.430088	1	0.141335	49.3075	33.0375	Other
NCU01370	-0.215511	1	0.568031	21.605	23.1046	Other
NCU01371	-0.143086	1	0.662013	27.029	27.7293	Other
NCU01373	0.193642	1	0.542698	41.3287	33.855	Other
NCU01374	-0.330419	1	0.407105	25.4793	29.4176	Other
NCU01375	-0.997741	0.967015	0.0283982	12.0376	21.4593	Other
NCU01376	0.0646465	1	0.926717	36.0424	31.9993	Other
NCU01377	0.145409	1	0.654405	35.3731	29.4753	Other
NCU01378	0.0669161	1	0.923371	32.818	29.2694	Other
NCU01379	0.222798	1	0.517341	46.0156	36.0356	Other
NCU01380	-0.405685	1	0.281011	20.9409	25.146	Other
NCU01381	-0.333073	1	0.499052	20.502	23.0715	Other
NCU01382	0.0413176	1	0.925651	35.128	31.3472	Other
NCU01383	-0.529312	1	0.222763	15.4483	20.3461	Other
NCU01386	0.277986	1	0.396793	46.0355	34.4075	Other
NCU01387	0.023355	1	0.981353	34.5007	31.3347	Other
NCU01388	0.313083	1	0.359283	38.9607	29.0551	Other
NCU01389	-0.203866	1	0.557305	27.3908	28.8572	Other
NCU01390	-0.144047	1	0.767178	25.8657	25.5423	Other
NCU01391	-0.397783	1	0.343707	23.5925	27.6889	Other
NCU01393	0.219847	1	0.62107	29.4385	23.1663	Other
NCU01394	0.0879962	1	0.821902	38.3213	32.9787	Other
NCU01395	0.0655093	1	0.92215	32.2928	28.0752	Other
NCU01397	-0.0596588	1	0.901301	30.2887	28.9445	Other
NCU01398	-0.118821	1	0.83355	26.5943	26.4006	Other
NCU01399	-0.14629	1	0.747174	21.5541	21.4194	Other
NCU01400	-0.278885	1	0.549908	20.0853	21.7201	Other
NCU01401	-0.0850556	1	0.958472	27.2345	26.7056	Other
NCU01402	0.103115	1	0.773599	39.5954	33.8947	Other
NCU01403	0.112135	1	0.791683	28.5165	23.8505	Other
NCU01404	-0.0656766	1	0.897868	27.8603	26.8162	Other
NCU01407	0.145362	1	0.760966	35.0193	29.7448	Other
NCU01408	0.144671	1	0.764322	36.6358	30.4236	Other
NCU01409	0.146628	1	0.691189	43.8328	37.0812	Other
NCU01410	0.170088	1	0.700704	34.4096	28.0589	Other
NCU01411	-0.109157	1	0.7899	31.3702	30.9749	Other
NCU01412	0.314007	1	0.35235	38.2678	28.0966	Other
NCU01413	0.338595	1	0.288574	39.1372	28.3571	Other
NCU01414	0.340329	1	0.25922	44.645	32.0573	Other
NCU01417	-0.0116205	1	1	30.8916	28.7468	Other
NCU01418	-0.287914	1	0.517978	22.3856	24.635	Other
NCU01419	0.275531	1	0.49495	33.4124	25.7791	Other
NCU01420	0.241867	1	0.465725	35.746	28.4236	Other
NCU01421	-0.0195645	1	1	28.3979	25.9236	Other
NCU01422	0.22614	1	0.553119	35.5761	27.9448	Other
NCU01423	-0.478786	1	0.312278	15.6659	21.0982	Other
NCU01424	-0.589087	1	0.18472	14.9859	20.3223	Other
NCU01425	0.0434579	1	1	24.6116	22.373	Other
NCU01426	-0.0701127	1	0.897868	28.2643	26.9692	Other
NCU01427	-0.0140361	1	1	22.4488	21.1084	Other
NCU01428	-0.880668	1	0.0508367	13.5824	21.6441	Other
NCU01429	0.0802251	1	0.91952	30.6134	26.36	Other
NCU01430	0.0819492	1	0.814247	35.2135	30.3962	Other
NCU01431	0.219166	1	0.512327	44.9322	35.2907	Other
NCU01432	-0.337505	1	0.488722	17.9995	21.8859	Other
NCU01433	0.0832635	1	0.864756	32.6074	28.5035	Other
NCU01434	-0.382086	1	0.398727	19.6896	23.6465	Other
NCU01435	0.29434	1	0.401295	39.457	29.6459	Other
NCU01436	-0.0640546	1	0.958472	27.1805	26.4953	Other
NCU01438	0.300626	1	0.325965	51.6159	37.8336	Other
NCU01439	0.0407152	1	0.981072	34.7	30.1331	Other
NCU01440	0.265577	1	0.442567	46.7297	36.0465	Other
NCU01441	-0.0563748	1	0.896011	27.7106	25.9986	Other
NCU01442	-0.120624	1	0.83355	27.1546	26.7375	Other
NCU01443	-0.0622366	1	0.90441	32.7006	30.9123	Other
NCU01444	-0.164145	1	0.729207	30.2084	30.4512	Other
NCU01445	0.0122886	1	1	31.5616	29.2934	Other
NCU01446	0.0771925	1	0.91952	29.5289	26.0193	Other
NCU01447	0.0260422	1	1	29.5405	27.119	Other
NCU01448	-0.944925	1	0.0567008	9.45626	16.6324	Other
NCU01449	-0.101235	1	0.786572	30.0496	29.8914	Other
NCU01451	-0.014288	1	1	30.6799	28.531	Other
NCU01452	0.358968	1	0.201172	52.7757	37.4948	Other
NCU01453	-0.93006	1	0.0383561	12.5365	21.3831	Other
NCU01454	-0.0796314	1	0.90441	32.825	31.4232	Other
NCU01455	0.222313	1	0.546958	34.7786	27.1942	Other
NCU01456	-0.0949266	1	0.83355	26.5479	25.8874	Other
NCU01457	0.157801	1	0.709208	35.9737	29.9326	Other
NCU01458	-0.00328607	1	1	28.1084	25.622	Other
NCU01459	0.0857863	1	0.866848	32.8294	29.0769	Other
NCU01460	-0.210176	1	0.664394	18.226	19.4785	Other
NCU01461	0.253351	1	0.490601	40.2447	31.4708	Other
NCU01462	-0.0862507	1	0.811897	39.7022	38.4515	Other
NCU01463	0.0469262	1	1	29.8574	26.8883	Other
NCU01464	-0.0247127	1	1	31.3605	30.1832	Other
NCU01465	0.304464	1	0.358047	44.4305	33.4062	Other
NCU01466	0.283316	1	0.372528	42.0731	31.1126	Other
NCU01467	0.0725443	1	0.860259	30.9696	26.5416	Other
NCU01468	0.261882	1	0.445139	41.3098	30.9777	Other
NCU01469	-0.197178	1	0.643631	23.7693	25.1341	Other
NCU01470	0.131877	1	0.779209	41.461	35.195	Other
NCU01471	0.0419618	1	1	35.4401	31.6351	Other
NCU01472	0.0905887	1	0.832795	42.9519	37.2295	Other
NCU01473	0.259074	1	0.519513	30.7633	23.3112	Other
NCU01474	0.25977	1	0.568966	29.9807	23.0914	Other
NCU01475	0.393328	1	0.222601	47.7121	33.2158	Other
NCU01476	-0.264164	1	0.489087	24.6245	27.1434	Other
NCU01477	0.185663	1	0.649456	35.6461	27.8524	Other
NCU01478	0.188173	1	0.580561	40.7012	32.7461	Other
NCU01479	0.253564	1	0.420051	43.9027	33.1169	Other
NCU01480	-0.264836	1	0.446523	25.9049	27.9079	Other
NCU01481	-0.255101	1	0.591542	25.0951	26.7077	Other
NCU01483	-0.571662	1	0.19698	15.7041	21.4651	Other
NCU01484	0.13658	1	0.724247	40.5398	33.6918	Other
NCU01485	0.216807	1	0.681189	30.6179	23.8674	Other
NCU01486	-0.117022	1	0.78308	30.1629	28.7423	Other
NCU01487	-0.110371	1	0.779412	29.7915	27.955	Other
NCU01489	-0.0479607	1	0.959211	28.8928	27.2403	Other
NCU01490	-0.8011	1	0.0505802	14.9236	23.2232	Other
NCU01491	0.0974337	1	0.870756	35.7014	30.793	Other
NCU01493	0.0151408	1	1	33.2407	30.196	Other
NCU01494	-0.0213182	1	1	26.4435	24.1223	Other
NCU01495	-0.108333	1	0.847004	32.0918	31.3064	Other
NCU01496	0.0377222	1	1	36.6388	32.5558	Other
NCU01498	0.144301	1	0.672296	40.0894	33.1045	Other
NCU01499	-0.00534406	1	1	31.8789	28.7204	Other
NCU01500	-0.358652	1	0.32863	26.16	30.2925	Other
NCU01501	-0.0706617	1	0.891972	25.6273	24.0768	Other
NCU01502	0.175	1	0.644288	33.6579	27.2819	Other
NCU01503	0.178122	1	0.654405	36.4529	29.0472	Other
NCU01504	-0.0450315	1	1	23.2857	22.6832	Other
NCU01505	-0.130297	1	0.677817	30.3379	30.5723	Other
NCU01506	0.0207056	1	1	25.3085	22.5748	Other
NCU01509	0.0754685	1	0.862562	32.7955	27.456	Other
NCU01510	0.177139	1	0.610948	36.2013	30.0944	Other
NCU01511	0.0901122	1	0.92215	32.5193	27.8715	Other
NCU01512	0.040462	1	1	27.1706	24.0364	Other
NCU01514	-0.244942	1	0.568031	22.244	23.483	Other
NCU01515	0.191626	1	0.634407	42.2081	34.158	Other
NCU01516	0.0217556	1	0.978666	26.6281	23.7917	Other
NCU01517	-0.126973	1	0.81979	22.5354	22.5713	Other
NCU01520	-0.894642	1	0.0334725	13.6833	22.3265	Other
NCU01521	-0.268213	1	0.504951	27.3317	29.2467	Other
NCU01522	0.111853	1	0.76754	37.3189	32.262	Other
NCU01523	0.209619	1	0.553119	35.0945	28.3233	Other
NCU01524	0.0824828	1	0.868846	35.1113	30.2215	Other
NCU01525	0.135673	1	0.717027	38.2062	32.128	Other
NCU01526	-0.123591	1	0.78308	28.54	29.0101	Other
NCU01527	0.318346	1	0.314924	43.8312	32.0368	Other
NCU01528	-0.532809	1	0.144577	23.897	31.4932	Other
NCU01529	-0.701245	1	0.139159	14.4658	19.7287	Other
NCU01530	-0.0110754	1	1	40.529	37.4016	Other
NCU01531	0.156785	1	0.661111	49.5388	40.8566	Other
NCU01532	0.0142351	1	1	43.491	39.338	Other
NCU01534	0.142642	1	0.727656	41.1373	34.5419	Other
NCU01535	0.293245	1	0.425549	37.1602	27.8288	Other
NCU01536	-0.800099	1	0.0881763	11.4565	17.6936	Other
NCU01539	0.0332483	1	0.981622	36.2187	32.234	Other
NCU01540	0.00200053	1	1	35.6911	32.204	Other
NCU01541	-0.64492	1	0.126489	17.1998	23.696	Other
NCU01542	0.220863	1	0.627297	30.6467	24.0675	Other
NCU01543	0.202399	1	0.580561	41.2918	32.7775	Other
NCU01545	0.193086	1	0.547767	42.8803	34.8687	Other
NCU01546	0.407671	1	0.167747	51.0667	34.5078	Other
NCU01547	0.188662	1	0.649456	33.9314	27.9237	Other
NCU01548	-0.235603	1	0.629572	21.9727	23.7606	Other
NCU01549	0.0614579	1	0.87764	39.1888	34.885	Other
NCU01550	0.341483	1	0.38784	31.6054	23.1453	Other
NCU01551	0.123168	1	0.852583	27.0379	23.0946	Other
NCU01552	0.272548	1	0.431637	45.7043	34.1213	Other
NCU01553	0.105544	1	0.791683	28.4736	23.8288	Other
NCU01554	0.318465	1	0.315212	49.1178	36.1003	Other
NCU01555	-0.404413	1	0.3699	21.2855	25.9142	Other
NCU01559	0.179081	1	0.605691	36.5614	29.2372	Other
NCU01560	0.398158	1	0.153512	61.0597	41.5919	Other
NCU01561	0.306617	1	0.303959	46.4189	34.8372	Other
NCU01562	-0.0278332	1	1	30.1701	27.9987	Other
NCU01563	-0.0731342	1	0.891972	25.5005	24.2069	Other
NCU01564	-0.206917	1	0.617656	29.8289	30.3508	Other
NCU01565	0.0822591	1	0.925651	35.946	30.4907	Other
NCU01566	-0.0217225	1	1	38.3771	35.5483	Other
NCU01567	0.173142	1	0.663707	38.9283	30.5283	Other
NCU01568	0.147357	1	0.668085	37.9013	31.9913	Other
NCU01569	0.312749	1	0.352028	44.0386	32.294	Other
NCU01570	0.22762	1	0.564725	38.0868	29.6915	Other
NCU01571	0.0911385	1	0.824251	40.0785	33.8728	Other
NCU01572	0.275551	1	0.34123	53.5507	41.107	Other
NCU01573	0.0740595	1	0.843557	50.6488	43.2586	Other
NCU01575	-0.0909346	1	0.851541	34.0941	32.7581	Other
NCU01577	-0.0220146	1	1	28.2121	26.5055	Other
NCU01579	-0.930875	0.987587	0.0296377	14.9858	25.8419	Other
NCU01580	0.0527432	1	0.979445	28.6704	25.2331	Other
NCU01581	-0.147036	1	0.77555	27.2892	27.6222	Other
NCU01584	0.0307652	1	1	35.9387	31.8056	Other
NCU01585	0.0603626	1	0.918102	29.5278	25.7612	Other
NCU01587	0.113417	1	0.864756	32.7441	27.8591	Other
NCU01589	0.176847	1	0.668085	40.0803	31.6362	Other
NCU01591	0.36243	1	0.279811	42.9394	30.6642	Other
NCU01592	0.147025	1	0.704158	48.581	40.8102	Other
NCU01593	0.117737	1	0.748434	48.0088	40.8441	Other
NCU01595	0.261981	1	0.445139	39.9392	30.8124	Other
NCU01596	0.262893	1	0.465725	36.7065	28.065	Other
NCU01597	0.224024	1	0.517341	46.169	36.2336	Other
NCU01598	-0.171228	1	0.699053	23.7509	24.0882	Other
NCU01599	0.276452	1	0.478602	39.2918	29.5402	Other
NCU01601	-0.18252	1	0.68652	21.644	22.2276	Other
NCU01605	0.0108663	1	1	26.2886	24.2898	Other
NCU01606	0.143522	1	0.676352	41.0643	33.9934	Other
NCU01607	0.302343	1	0.380646	36.276	27.3058	Other
NCU01608	0.113938	1	0.773599	38.5823	33.692	Other
NCU01610	-0.923119	1	0.0666623	10.8435	17.9355	Other
NCU01611	0.24304	1	0.457154	42.7476	33.0125	Other
NCU01612	0.225689	1	0.553119	36.2326	28.1494	Other
NCU01613	0.24756	1	0.501739	35.0776	27.0776	Other
NCU01614	0.0873299	1	0.927739	36.5575	32.4353	Other
NCU01615	0.191422	1	0.570201	39.051	31.2655	Other
NCU01620	-0.659804	1	0.0938455	18.8563	27.224	Other
NCU01623	-0.0428606	1	1	33.3636	32.3223	Other
NCU01625	0.0839442	1	0.821902	38.4533	33.0549	Other
NCU01629	-0.213887	1	0.68652	21.5618	22.9554	Other
NCU01631	-0.959201	1	0.0653051	9.34087	15.8227	Other
NCU01632	0.302538	1	0.33297	47.365	34.482	Other
NCU01633	-0.207434	1	0.557305	27.9399	28.9859	Other
NCU01634	0.0398181	1	0.925651	34.6204	31.3059	Other
NCU01635	0.046744	1	1	28.779	26.9283	Other
NCU01636	-0.595011	1	0.136037	17.5162	24.2508	Other
NCU01637	0.149829	1	0.798953	29.7708	24.9323	Other
NCU01638	0.201448	1	0.557421	45.916	36.112	Other
NCU01640	-0.0540168	1	0.909838	37.4684	34.6205	Other
NCU01642	0.268713	1	0.349723	49.305	37.7635	Other
NCU01643	0.266009	1	0.369616	46.898	35.7189	Other
NCU01644	0.122231	1	0.724247	40.8639	33.9216	Other
NCU01645	-0.101447	1	0.839345	29.725	28.1302	Other
NCU01646	0.24133	1	0.478602	38.2575	29.9436	Other
NCU01647	-0.0212898	1	1	31.0482	29.2473	Other
NCU01648	0.0773468	1	0.874339	37.4092	32.8764	Other
NCU01649	-0.362546	1	0.3699	21.9691	25.6277	Other
NCU01650	0.0547681	1	0.91952	29.8927	26.6411	Other
NCU01651	-0.165312	1	0.71532	26.6473	27.2771	Other
NCU01652	0.128125	1	0.760966	35.6594	30.0139	Other
NCU01653	-0.380912	1	0.406224	16.6934	19.8814	Other
NCU01654	-0.0574319	1	0.957691	26.8562	25.4432	Other
NCU01655	0.0038886	1	1	25.378	23.6915	Other
NCU01656	0.135216	1	0.676352	40.053	33.9507	Other
NCU01657	-0.268543	1	0.595623	17.4361	19.8189	Other
NCU01658	0.230145	1	0.442567	46.5894	36.7819	Other
NCU01659	0.241546	1	0.51454	37.0676	29.0105	Other
NCU01660	-0.644288	1	0.18472	14.9045	21.0613	Other
NCU01664	-0.031386	1	0.962945	34.7135	32.8235	Other
NCU01665	0.0987229	1	0.866848	34.8298	28.9814	Other
NCU01666	0.0217286	1	1	30.4589	27.4311	Other
NCU01667	-0.169461	1	0.704781	25.8941	25.1106	Other
NCU01668	-0.170377	1	0.62897	30.9923	31.7131	Other
NCU01669	0.369475	1	0.273403	41.564	29.6877	Other
NCU01670	-0.180969	1	0.692978	22.3961	23.2528	Other
NCU01672	0.182513	1	0.63861	43.8615	35.1464	Other
NCU01673	-0.152849	1	0.699053	23.9414	24.0289	Other
NCU01674	0.237547	1	0.47228	37.1388	29.2521	Other
NCU01675	0.292601	1	0.385009	43.3784	32.4398	Other
NCU01678	0.027648	1	0.980145	30.7906	27.5196	Other
NCU01679	0.0970868	1	0.870756	36.5349	30.8263	Other
NCU01680	0.250377	1	0.407942	48.189	36.7082	Other
NCU01688	-0.176175	1	0.644205	33.9575	35.1886	Other
NCU01689	0.105058	1	0.821902	38.2378	32.8853	Other
NCU01692	0.127883	1	0.749969	32.467	27.5375	Other
NCU01695	-0.0329511	1	1	31.8106	29.3381	Other
NCU01696	0.0559733	1	0.920868	31.5875	27.5553	Other
NCU01697	-0.0608018	1	0.894049	26.0622	24.9531	Other
NCU01698	0.166387	1	0.58547	41.8899	34.0393	Other
NCU01699	0.152905	1	0.672296	40.064	32.8308	Other
NCU01700	-0.490312	1	0.231181	18.6838	24.5002	Other
NCU01701	0.01194	1	1	33.2844	31.4911	Other
NCU01702	0.437724	1	0.193619	42.8349	28.843	Other
NCU01703	0.209275	1	0.559036	36.913	29.3717	Other
NCU01704	-0.281425	1	0.452234	20.1224	23.1444	Other
NCU01705	-0.0311512	1	1	22.91	21.5594	Other
NCU01706	-0.210007	1	0.679638	20.3931	21.7139	Other
NCU01713	-0.0171222	1	1	27.9573	26.9083	Other
NCU01715	-0.0609447	1	0.897868	27.8608	27.1652	Other
NCU01717	-0.0465668	1	1	34.5908	33.2967	Other
NCU01720	0.0462374	1	0.979804	29.4731	26.1518	Other
NCU01722	0.303414	1	0.327106	45.5762	33.9196	Other
NCU01724	0.118283	1	0.741734	30.3579	25.7055	Other
NCU01725	-0.0805365	1	0.894049	26.4206	25.5366	Other
NCU01728	0.00714182	1	1	31.3502	28.9661	Other
NCU01729	0.0705955	1	0.870756	35.4517	31.3044	Other
NCU01731	0.242002	1	0.51454	37.7187	28.9236	Other
NCU01734	-0.218114	1	0.68652	21.9357	22.8361	Other
NCU01735	-0.188843	1	0.699053	24.0894	24.8392	Other
NCU01737	0.171323	1	0.634407	42.3999	34.5108	Other
NCU01738	0.11793	1	0.791683	27.4234	23.5806	Other
NCU01739	-0.482248	1	0.336442	14.5063	19.0284	Other
NCU01740	-0.460407	1	0.241772	20.0183	25.5081	Other
NCU01741	-0.175618	1	0.643631	24.1977	25.1229	Other
NCU01742	0.059225	1	0.925651	35.0631	30.9486	Other
NCU01744	0.0305121	1	0.983024	43.5208	37.624	Other
NCU01745	0.176661	1	0.709208	36.2272	29.6058	Other
NCU01747	0.153834	1	0.717027	38.4146	31.7233	Other
NCU01748	0.270631	1	0.478602	39.2662	29.5355	Other
NCU01750	-0.643382	1	0.162817	15.8702	22.0768	Other
NCU01751	-0.0573154	1	0.958472	27.0563	26.2463	Other
NCU01752	-0.0549332	1	0.955988	25.0519	23.3781	Other
NCU01753	0.165671	1	0.705048	36.861	28.9754	Other
NCU01754	-0.524749	1	0.173995	19.7338	25.3535	Other
NCU01756	0.00322526	1	1	26.0799	23.7107	Other
NCU01757	-0.0380365	1	0.908568	34.6111	33.329	Other
NCU01758	-0.00808455	1	1	29.6908	26.7563	Other
NCU01759	-0.0795113	1	0.830407	25.5513	24.9583	Other
NCU01760	0.2164	1	0.501816	42.338	33.7206	Other
NCU01761	0.0216646	1	0.981353	34.7506	31.2648	Other
NCU01762	-0.314712	1	0.539952	18.0657	21.1042	Other
NCU01763	0.117239	1	0.824251	39.0705	33.397	Other
NCU01764	-0.0796273	1	0.955988	24.7137	23.8672	Other
NCU01765	0.0904439	1	0.87764	40.9011	34.3364	Other
NCU01766	-0.336088	1	0.343707	23.1489	26.9601	Other
NCU01767	-0.0519893	1	1	28.351	26.5284	Other
NCU01768	0.161407	1	0.594792	43.447	35.9277	Other
NCU01769	-0.214813	1	0.576311	23.8746	24.2383	Other
NCU01771	-0.193738	1	0.747174	21.0769	21.9565	Other
NCU01772	0.191973	1	0.616	38.2334	30.678	Other
NCU01776	0.304292	1	0.298631	52.1272	38.3551	Other
NCU01777	0.115013	1	0.724247	40.5099	34.0531	Other
NCU01779	-0.117432	1	0.779412	28.9756	28.1823	Other
NCU01780	-0.371903	1	0.337123	27.5323	31.5115	Other
NCU01781	-0.0224271	1	1	32.0655	30.3621	Other
NCU01782	0.0886633	1	0.862562	31.8795	27.4465	Other
NCU01783	-0.174836	1	0.650087	25.4631	25.9716	Other
NCU01784	0.276969	1	0.445139	40.8448	30.6618	Other
NCU01785	-0.103579	1	0.83355	27.0482	26.3829	Other
NCU01786	-0.00961982	1	1	28.3018	25.9061	Other
NCU01788	-0.282325	1	0.568031	21.3246	23.9238	Other
NCU01789	0.244404	1	0.442567	47.2046	36.2194	Other
NCU01790	-0.719789	1	0.166408	11.5337	17.2005	Other
NCU01791	0.0856771	1	0.864756	32.2983	28.1468	Other
NCU01792	-0.0144293	1	1	29.7712	27.3763	Other
NCU01793	0.233711	1	0.46288	43.9834	33.6972	Other
NCU01794	-0.0800007	1	0.956865	24.2078	24.8144	Other
NCU01795	0.15231	1	0.672296	39.6481	32.7046	Other
NCU01796	0.0759101	1	0.874339	37.9405	32.9622	Other
NCU01797	0.266758	1	0.431637	45.1664	34.3098	Other
NCU01798	0.0641967	1	0.928719	37.8444	33.6144	Other
NCU01799	-0.383224	1	0.333947	22.4143	26.4106	Other
NCU01800	0.000450285	1	1	28.2134	25.2874	Other
NCU01801	-0.0772345	1	0.853663	34.6579	33.5547	Other
NCU01802	0.0231609	1	0.982127	37.6952	34.03	Other
NCU01803	-0.26195	1	0.470325	28.6485	31.0182	Other
NCU01804	-0.0650536	1	0.889768	23.5931	23.0025	Other
NCU01805	-0.138695	1	0.827079	24.42	24.6056	Other
NCU01806	0.0426573	1	0.979804	30.124	26.295	Other
NCU01807	-0.196437	1	0.629572	23.6833	23.3786	Other
NCU01808	-0.362732	1	0.3699	22.9746	25.1595	Other
NCU01809	0.267795	1	0.418552	36.6825	27.5132	Other
NCU01810	0.16474	1	0.709208	36.3101	29.7928	Other
NCU01811	-0.792396	1	0.12685	12.4578	19.3026	Other
NCU01812	-0.134614	1	0.823547	23.7839	23.9137	Other
NCU01813	0.121151	1	0.760966	35.2483	30.1112	Other
NCU01814	-0.0469665	1	0.961816	33.704	31.1559	Other
NCU01815	-0.125039	1	0.771479	26.0101	26.336	Other
NCU01816	-0.212297	1	0.692978	22.2614	23.8582	Other
NCU01817	0.140841	1	0.709208	35.9914	30.0674	Other
NCU01818	0.0422747	1	0.980469	30.7696	28.0712	Other
NCU01819	-0.0283336	1	0.959211	28.4438	26.9512	Other
NCU01820	0.24801	1	0.43718	44.7315	35.3557	Other
NCU01821	-0.152287	1	0.811493	20.4543	20.9188	Other
NCU01822	0.0130105	1	1	27.1138	24.5862	Other
NCU01823	0.167692	1	0.650401	46.4969	37.922	Other
NCU01824	0.231776	1	0.478602	37.7934	30.2562	Other
NCU01826	0.0319361	1	0.98188	37.0825	33.2266	Other
NCU01827	0.188054	1	0.611697	48.8334	38.8567	Other
NCU01828	-0.50208	1	0.241772	19.5608	25.7866	Other
NCU01829	-0.272647	1	0.446523	24.3514	27.8009	Other
NCU01830	-0.0548768	1	0.897868	28.492	26.9692	Other
NCU01831	0.373678	1	0.279811	41.7603	30.5275	Other
NCU01833	0.280636	1	0.385888	49.7657	37.8779	Other
NCU01834	-0.971534	1	0.0428837	11.1224	18.8048	Other
NCU01835	-0.499243	1	0.161762	22.4032	30.0935	Other
NCU01837	-0.115676	1	0.786572	30.1048	30.168	Other
NCU01838	0.152165	1	0.745952	31.9401	26.1832	Other
NCU01839	-0.188686	1	0.564081	28.2456	29.6445	Other
NCU01840	0.186783	1	0.607669	46.7037	37.935	Other
NCU01841	-0.481021	1	0.259159	18.0907	23.7418	Other
NCU01842	0.274387	1	0.390984	44.2688	33.6676	Other
NCU01843	0.127733	1	0.757463	35.0743	28.9685	Other
NCU01844	-0.11729	1	0.771479	26.8368	26.0216	Other
NCU01845	0.0514288	1	0.981622	37.8776	31.8611	Other
NCU01846	0.163135	1	0.709208	37.3613	29.8229	Other
NCU01848	0.00592473	1	1	39.6382	36.2457	Other
NCU01849	0.251685	1	0.478602	38.8286	29.943	Other
NCU01850	0.0991947	1	0.920868	31.801	26.7945	Other
NCU01851	0.0388584	1	0.979067	27.583	24.5155	Other
NCU01852	0.425526	1	0.170658	46.4731	31.8904	Other
NCU01853	0.119191	1	0.826509	40.0789	34.2001	Other
NCU01854	-0.368443	1	0.418784	17.4106	20.6811	Other
NCU01855	-0.421998	1	0.325006	18.5007	21.6729	Other
NCU01856	0.27141	1	0.47228	38.2276	28.854	Other
NCU01857	0.189002	1	0.564725	37.5759	30.2323	Other
NCU01858	0.0372728	1	1	27.4762	25.0781	Other
NCU01859	0.0560995	1	1	32.0613	28.5984	Other
NCU01860	0.0498984	1	1	29.7152	26.8067	Other
NCU01861	-0.433076	1	0.37852	14.3254	17.5744	Other
NCU01862	-0.320912	1	0.419259	21.927	25.0779	Other
NCU01865	0.127614	1	0.816907	36.2326	30.4317	Other
NCU01866	-0.386501	1	0.379835	22.3807	26.7879	Other
NCU01867	0.103929	1	0.911571	24.4786	21.239	Other
NCU01868	-0.0387533	1	0.899629	29.4142	27.7049	Other
NCU01869	-0.277581	1	0.470325	28.9811	31.5309	Other
NCU01870	-0.727929	1	0.0698319	17.7926	26.9238	Other
NCU01871	0.0416362	1	0.91952	31.4264	26.6467	Other
NCU01873	-0.0583256	1	0.905858	33.6401	31.8956	Other
NCU01874	0.160445	1	0.696163	33.9685	27.144	Other
NCU01875	0.163685	1	0.594792	43.8305	35.9549	Other
NCU01877	0.176669	1	0.644288	34.706	27.2956	Other
NCU01878	0.202353	1	0.594792	44.3128	35.1733	Other
NCU01879	0.251097	1	0.533836	32.7524	25.0112	Other
NCU01880	-0.172691	1	0.710194	26.285	26.5803	Other
NCU01881	-0.0221372	1	1	34.3535	31.8997	Other
NCU01882	0.0181687	1	1	33.7401	29.6482	Other
NCU01883	0.162898	1	0.649456	34.5458	28.3935	Other
NCU01884	0.137263	1	0.760966	35.1829	29.9853	Other
NCU01886	-0.0609759	1	0.907243	36.0062	33.0089	Other
NCU01888	0.0202215	1	1	31.3842	28.3174	Other
NCU01889	-0.395308	1	0.363522	17.5847	20.5858	Other
NCU01893	-0.487556	1	0.235413	16.3596	21.2978	Other
NCU01894	0.228382	1	0.553119	36.0344	27.917	Other
NCU01895	-0.0399291	1	0.958472	27.7663	26.2207	Other
NCU01896	-0.170562	1	0.806891	19.3164	19.8855	Other
NCU01897	-0.276648	1	0.526675	23.1796	25.415	Other
NCU01898	-0.281535	1	0.480566	24.3571	26.2481	Other
NCU01899	-0.0824559	1	0.836524	27.8143	26.841	Other
NCU01900	-0.19547	1	0.720934	17.1881	17.934	Other
NCU01901	-0.131356	1	0.720183	27.8171	27.9245	Other
NCU01902	-0.45903	1	0.363176	13.2542	16.675	Other
NCU01903	0.19432	1	0.696163	33.3802	26.8188	Other
NCU01904	-0.0756637	1	0.891972	24.4185	24.4304	Other
NCU01905	0.0149772	1	1	24.5565	23.174	Other
NCU01906	-0.318438	1	0.452234	20.1898	23.1944	Other
NCU01907	-0.304993	1	0.499052	19.7786	22.7191	Other
NCU01908	0.0929716	1	0.923371	33.2977	28.7859	Other
NCU01910	-0.0205029	1	1	29.2686	27.4751	Other
NCU01911	0.238959	1	0.564725	38.3406	29.4886	Other
NCU01912	0.262251	1	0.413992	42.0107	32.124	Other
NCU01913	0.0635539	1	0.980469	31.6812	27.8431	Other
NCU01914	0.119134	1	0.741734	30.0899	25.6934	Other
NCU01916	0.13185	1	0.805511	32.8942	26.9354	Other
NCU01917	-0.0984168	1	0.839345	28.2115	28.1966	Other
NCU01918	0.138575	1	0.808558	31.8918	27.7127	Other
NCU01919	0.183935	1	0.58547	41.3046	33.7826	Other
NCU01920	0.0222377	1	1	27.884	25.1187	Other
NCU01922	0.0900768	1	0.857835	29.2763	25.6836	Other
NCU01924	0.323725	1	0.373288	35.7198	26.1812	Other
NCU01926	-0.296519	1	0.454805	25.833	29.5665	Other
NCU01927	0.313116	1	0.366005	40.5673	29.9005	Other
NCU01928	0.126856	1	0.805511	31.8449	27.1149	Other
NCU01929	0.17883	1	0.58547	40.8148	33.89	Other
NCU01930	0.109773	1	0.918102	28.8734	24.9746	Other
NCU01931	-0.464425	1	0.290329	17.8944	22.8185	Other
NCU01932	0.326915	1	0.308594	41.9265	30.8687	Other
NCU01935	-0.297962	1	0.47161	22.1205	25.4111	Other
NCU01936	0.12318	1	0.757463	34.5752	29.486	Other
NCU01938	0.214631	1	0.570201	39.4877	30.8766	Other
NCU01939	0.136762	1	0.737171	44.72	37.2975	Other
NCU01940	0.320637	1	0.33295	41.4455	30.0645	Other
NCU01943	-0.22254	1	0.570556	28.9964	31.3607	Other
NCU01944	-0.0401877	1	0.960578	30.7225	28.8454	Other
NCU01945	0.0268884	1	1	31.0624	27.7373	Other
NCU01947	-0.0352732	1	0.962945	34.3414	32.7885	Other
NCU01948	0.180078	1	0.59021	43.7739	34.5416	Other
NCU01949	0.257552	1	0.46288	43.998	33.4198	Other
NCU01950	0.199479	1	0.649456	34.1774	27.856	Other
NCU01951	0.199074	1	0.580561	39.1031	32.7021	Other
NCU01953	0.308962	1	0.30965	47.6367	35.3878	Other
NCU01954	0.0439555	1	1	34.712	31.5738	Other
NCU01955	-0.0294503	1	1	27.5945	26.3035	Other
NCU01956	0.333153	1	0.271094	45.9098	33.8119	Other
NCU01957	-0.798289	1	0.096918	13.2729	21.0782	Other
NCU01961	0.0272111	1	1	42.0135	38.1417	Other
NCU01962	0.144915	1	0.749969	33.072	27.2129	Other
NCU01963	0.208886	1	0.553119	34.7697	28.2549	Other
NCU01964	0.0722917	1	0.870756	35.7213	31.3599	Other
NCU01965	0.243103	1	0.473816	45.7909	35.1013	Other
NCU01966	0.29682	1	0.254955	60.5137	44.0559	Other
NCU01967	0.0198889	1	1	31.0421	28.0299	Other
NCU01968	0.244195	1	0.47228	37.4967	29.3945	Other
NCU01969	-0.466526	1	0.312278	15.6163	20.8547	Other
NCU01970	-0.188369	1	0.672281	17.9576	20.4155	Other
NCU01971	-0.0635603	1	1	24.288	22.8665	Other
NCU01972	-0.374935	1	0.280525	24.205	28.8859	Other
NCU01973	-0.0830014	1	0.902893	30.6316	30.3446	Other
NCU01974	0.0662579	1	0.925651	34.8626	30.8233	Other
NCU01975	-0.0637279	1	0.897868	28.1165	27.0368	Other
NCU01976	0.03	1	1	37.5636	33.7167	Other
NCU01977	-0.043228	1	0.963473	36.791	33.6348	Other
NCU01978	0.0749853	1	0.876022	38.638	33.8929	Other
NCU01979	0.13453	1	0.760966	35.9191	29.6868	Other
NCU01980	-0.00678434	1	1	30.5655	27.777	Other
NCU01981	-0.0485442	1	0.897868	28.46	26.801	Other
NCU01982	-0.0945838	1	0.955988	24.2769	23.8232	Other
NCU01983	0.00422787	1	1	27.4088	24.3698	Other
NCU01984	0.229014	1	0.526411	39.5648	30.8843	Other
NCU01985	0.317907	1	0.380646	37.0084	26.8552	Other
NCU01987	0.0497452	1	0.928719	38.7967	34.025	Other
NCU01988	0.0460324	1	0.931436	41.0688	37.0255	Other
NCU01989	0.146603	1	0.724247	39.4748	33.5419	Other
NCU01990	0.0119599	1	1	32.6783	29.8701	Other
NCU01991	0.110168	1	0.819456	37.4616	31.8248	Other
NCU01992	0.143268	1	0.684031	42.8327	35.7406	Other
NCU01993	0.0987752	1	0.862562	31.6839	27.0507	Other
NCU01994	0.0954191	1	0.920868	30.9056	26.9268	Other
NCU01995	0.0177788	1	0.982593	40.2937	36.0391	Other
[truncated: 7,731 more rows]

## Sheet: iswi
genes	logFC	FDR	Pvalue	iswi	wt	category
NCU10644	1.17488	0.0302031	9.75628e-05	61.5336	24.9679	Up
NCU00009	-1.03315	0.150425	0.00422056	17.6514	32.8934	Down
NCU00013	-1.02364	0.196045	0.0074824	17.7374	31.5156	Down
NCU00031	-1.01862	0.217544	0.00973297	15.6563	29.3205	Down
NCU00071	-1.10986	0.14771	0.00394702	16.9588	31.4268	Down
NCU00099	-1.17425	0.208206	0.00891508	11.9603	22.4478	Down
NCU00297	-1.11675	0.0820747	0.000892643	20.7014	40.0339	Down
NCU00365	-1.20901	0.260737	0.014989	9.02709	18.7348	Down
NCU00474	-1.04471	0.19332	0.00711291	16.0026	28.794	Down
NCU00525	-1.1822	0.0632259	0.000500349	18.7967	38.9399	Down
NCU00532	-1.2251	0.0439286	0.000239282	19.7371	41.6335	Down
NCU00533	-1.07596	0.0966925	0.00141289	19.7499	38.2477	Down
NCU00645	-1.15779	0.19332	0.00688309	12.1563	24.2101	Down
NCU00746	-1.48083	0.0324834	0.000136878	12.9313	32.1805	Down
NCU00806	-1.26024	0.0632259	0.000494989	16.7375	35.6721	Down
NCU00807	-1.02806	0.155997	0.00444101	19.3541	35.1584	Down
NCU00834	-1.00566	0.258608	0.0144852	14.5923	26.3891	Down
NCU00840	-1.21493	0.0773998	0.00081934	16.9466	34.7412	Down
NCU00841	-1.0525	0.171858	0.00547542	17.1085	31.3253	Down
NCU00851	-1.24443	0.208206	0.0088156	8.99848	19.6051	Down
NCU00852	-1.16773	0.150162	0.00411274	13.9195	28.1777	Down
NCU00861	-1.02514	0.231423	0.0111074	15.9208	28.5274	Down
NCU00946	-1.16375	0.117201	0.00221635	15.2768	29.9479	Down
NCU00947	-1.01192	0.204982	0.00853216	16.2926	30.1929	Down
NCU00961	-1.02733	0.284896	0.0180073	12.6375	22.1817	Down
NCU00995	-1.05422	0.419187	0.0492856	9.99158	18.2867	Down
NCU01054	-1.02357	0.210376	0.00925395	14.631	27.1336	Down
NCU01056	-1.11678	0.217544	0.00983755	12.5986	24.3889	Down
NCU01075	-1.25369	0.150162	0.0041559	12.1374	25.8026	Down
NCU01076	-1.62983	0.0302031	9.94762e-05	10.6047	30.2629	Down
NCU01077	-1.11595	0.136425	0.00318279	14.4954	29.7591	Down
NCU01078	-1.31787	0.120618	0.00247242	12.2386	26.6702	Down
NCU01090	-1.36487	0.0548098	0.000385577	13.6435	30.9256	Down
NCU01153	-1.24656	0.278853	0.0170746	9.07331	17.9839	Down
NCU01262	-1.19165	0.0938779	0.00134111	16.2521	34.3725	Down
NCU01292	-1.01863	0.196045	0.0074824	17.0468	30.9742	Down
NCU01314	-1.30288	0.136425	0.0031523	11.2083	24.7252	Down
NCU01396	-1.13621	0.277053	0.0167143	10.9149	20.631	Down
NCU01415	-1.00876	0.38414	0.037348	11.195	19.8297	Down
NCU01462	-1.33263	0.0302031	0.000102436	17.2074	38.4515	Down
NCU01519	-1.05659	0.356049	0.0309942	10.8823	18.9675	Down
NCU01620	-1.04963	0.210376	0.00925395	14.9718	27.224	Down
NCU01681	-1.05338	0.295624	0.020605	13.2063	21.2518	Down
NCU01734	-1.04268	0.326843	0.0247903	12.3696	22.8361	Down
NCU01848	-1.21901	0.074187	0.000724333	17.6478	36.2457	Down
NCU01863	-1.13496	0.289488	0.0191048	10.424	19.5815	Down
NCU01870	-1.03709	0.210376	0.00925395	14.3638	26.9238	Down
NCU01876	-1.03265	0.171858	0.00547542	16.4251	30.9136	Down
NCU01899	-1.06064	0.224379	0.0105617	14.4224	26.841	Down
NCU01943	-1.27683	0.0820747	0.000902569	15.0476	31.3607	Down
NCU01957	-1.07392	0.316625	0.0235923	11.6038	21.0782	Down
NCU01958	-1.03522	0.329586	0.0262517	17.3466	24.4951	Down
NCU01959	-2.04222	0.00628187	1.42347e-06	13.2272	37.6678	Down
NCU01960	-1.58225	0.0324834	0.00012103	16.5025	34.0784	Down
NCU02171	-1.04022	0.335049	0.0270312	11.1102	19.6502	Down
NCU02174	-1.07318	0.247779	0.0137768	13.4645	24.4389	Down
NCU02183	-1.12471	0.289488	0.0191048	10.2994	19.7481	Down
NCU02189	-1.18602	0.178604	0.00604981	12.4785	25.4924	Down
NCU02275	-1.03366	0.144863	0.00370719	18.8784	33.9413	Down
NCU02323	-1.324	0.0367553	0.000174957	16.9371	37.9045	Down
NCU02377	-1.1671	0.289488	0.0191048	10.2219	20.106	Down
NCU02436	-1.03093	0.326843	0.0247903	12.4017	22.7407	Down
NCU02517	-1.18315	0.236703	0.0115558	10.154	20.6845	Down
NCU02703	-1.08084	0.164818	0.00511564	15.7944	29.1037	Down
NCU02854	-1.01635	0.177379	0.0057607	17.9339	32.939	Down
NCU02861	-1.05804	0.117201	0.00221276	20.1786	37.8092	Down
NCU02862	-1.34035	0.0344484	0.000155912	17.1964	38.8718	Down
NCU02865	-1.22866	0.074187	0.000724333	17.7182	36.3385	Down
NCU02867	-1.21021	0.0894128	0.00118543	15.4308	31.6951	Down
NCU02876	-1.029	0.326843	0.0247903	12.6922	22.736	Down
NCU02908	-1.04128	0.144863	0.00370719	18.8823	33.5535	Down
NCU02920	-1.10266	0.196045	0.00756559	13.5505	26.0607	Down
NCU02921	-1.26142	0.178604	0.0060575	10.8288	22.982	Down
NCU02922	-1.31383	0.129766	0.00279227	11.3303	25.8477	Down
NCU02924	-1.1147	0.335049	0.0270312	11.0184	20.2883	Down
NCU02931	-1.05412	0.238499	0.0120598	13.9302	25.4125	Down
NCU02939	-1.2082	0.159614	0.00467645	13.6314	27.8513	Down
NCU03140	-1.10451	0.416934	0.046964	8.93155	16.2562	Down
NCU03163	-1.05819	0.120618	0.00235718	18.9069	34.6731	Down
NCU03182	-1.16774	0.197441	0.0078327	12.0626	23.5769	Down
NCU03286	-1.39454	0.0275193	5.93943e-05	17.152	40.2077	Down
NCU03392	-1.06934	0.19332	0.00711291	15.5601	29.2231	Down
NCU03414	-1.00423	0.245797	0.0126814	15.1746	27.5296	Down
NCU03424	-1.06839	0.159614	0.00480646	17.0237	32.2328	Down
NCU03452	-1.05391	0.356049	0.0309942	11.0956	18.9561	Down
NCU03456	-1.01521	0.14771	0.00390106	19.7138	35.8346	Down
NCU03499	-1.17272	0.0894128	0.00118301	17.1652	35.0447	Down
NCU03520	-1.00001	0.404251	0.0428837	11.0339	18.5237	Down
NCU03701	-1.03142	0.356049	0.0309942	11.0138	18.631	Down
NCU03721	-1.15801	0.277053	0.0167143	11.4462	21.0678	Down
NCU03829	-1.14714	0.305439	0.0218484	9.86868	19.2308	Down
NCU03864	-1.02367	0.204982	0.00853216	16.8249	30.1455	Down
NCU03875	-3.43185	2.50946e-08	2.57909e-12	3.60403	35.1261	Down
NCU03918	-1.03839	0.177379	0.0057607	18.1941	33.3119	Down
NCU03984	-1.25047	0.0548098	0.000388682	18.1262	38.0726	Down
NCU04006	-1.03879	0.38414	0.037348	11.6165	20.0622	Down
NCU04031	-1.23417	0.0632259	0.000494989	17.1005	35.9727	Down
NCU04214	-1.18266	0.0894128	0.00118301	16.9453	35.1558	Down
NCU04222	-1.06268	0.142397	0.00346845	16.6722	31.79	Down
NCU04276	-1.04197	0.344532	0.0283982	12.0465	21.9787	Down
NCU04283	-1.30559	0.136425	0.0031523	11.4652	24.292	Down
NCU04330	-1.07953	0.295624	0.020605	11.9422	21.7295	Down
NCU04366	-1.14294	0.0773998	0.00081234	18.4893	37.5625	Down
NCU04371	-1.02758	0.238499	0.0120598	13.8544	25.2333	Down
NCU04420	-1.05645	0.419187	0.0492856	10.4116	18.2283	Down
NCU04424	-1.1274	0.206207	0.00862551	13.0834	25.4638	Down
NCU04478	-1.00532	0.196045	0.0074824	17.2301	31.1165	Down
NCU04490	-1.41002	0.029523	8.19239e-05	15.548	36.5513	Down
NCU04559	-1.03822	0.363016	0.0325544	11.3562	20.9678	Down
NCU04561	-1.33794	0.0966925	0.0014503	11.9715	27.4973	Down
NCU04563	-1.4343	0.0649336	0.000533883	11.9375	28.5167	Down
NCU04689	-1.03947	0.275805	0.0165539	14.1575	25.7608	Down
NCU04704	-1.65906	0.0274459	4.94235e-05	11.3095	32.3505	Down
NCU04705	-1.36506	0.0966925	0.0014503	12.4033	27.456	Down
NCU04708	-1.62598	0.0238783	2.45409e-05	12.5178	34.0348	Down
NCU04709	-1.28352	0.0548098	0.000374284	16.1023	34.7713	Down
NCU04875	-1.34384	0.136425	0.0031523	10.7261	25.0555	Down
NCU04876	-1.47762	0.0318371	0.000111931	14.3858	33.8304	Down
NCU04891	-1.03483	0.120618	0.00251649	19.1906	36.435	Down
NCU04892	-1.10212	0.126604	0.00268041	17.6497	34.3295	Down
NCU04893	-1.30912	0.0530856	0.000332808	16.0562	36.1809	Down
NCU04894	-1.02001	0.136606	0.00325721	19.0178	34.5215	Down
NCU04896	-1.15615	0.129766	0.00280071	15.8356	31.5117	Down
NCU04937	-1.04496	0.224379	0.0105617	14.0198	26.1358	Down
NCU04948	-1.41361	0.0344484	0.00015932	14.4206	34.8001	Down
NCU04961	-1.1355	0.0741504	0.000693493	21.4157	41.8931	Down
NCU04962	-1.45378	0.0384625	0.000197649	13.7432	33.2961	Down
NCU04974	-1.046	0.416934	0.046964	8.76005	15.8315	Down
NCU05018	-1.03946	0.144863	0.00370719	18.4831	34.2214	Down
NCU05030	-1.01034	0.231423	0.0111074	16.091	28.5378	Down
NCU05040	-1.18623	0.236703	0.0115558	10.304	20.8554	Down
NCU05055	-1.00421	0.196045	0.0074824	17.8291	31.4508	Down
NCU05056	-1.32023	0.102364	0.00163067	11.7976	26.2991	Down
NCU05059	-1.23355	0.120618	0.00247242	12.2902	26.0695	Down
NCU05080	-1.26511	0.110572	0.00193668	13.0875	28.0409	Down
NCU05084	-1.06925	0.144863	0.00370719	17.923	34.3558	Down
NCU05086	-1.00475	0.258608	0.0144852	15.0566	26.8461	Down
NCU05099	-1.02609	0.187301	0.00656421	17.9122	32.3545	Down
NCU05111	-1.04257	0.150425	0.00422056	17.921	33.3569	Down
NCU05142	-1.36946	0.0830783	0.00093922	11.8782	27.1744	Down
NCU05172	-1.20188	0.178604	0.00604981	12.8288	25.9459	Down
NCU05178	-1.12508	0.136425	0.00318279	15.4664	30.0142	Down
NCU05277	-1.14355	0.129766	0.00280071	15.9092	31.5038	Down
NCU05284	-1.06282	0.335049	0.0270312	11.1379	19.4293	Down
NCU05320	-1.19547	0.120618	0.00251323	14.306	29.5194	Down
NCU05351	-1.48499	0.0274459	5.14681e-05	14.4312	37.3126	Down
NCU05354	-1.39349	0.0330897	0.000142833	15.3235	36.0516	Down
NCU05358	-1.10633	0.144863	0.00361767	14.8488	28.8412	Down
NCU05368	-1.19044	0.236703	0.0115558	10.8686	20.6198	Down
NCU05576	-1.02718	0.404251	0.0428837	10.7996	19.2085	Down
NCU05628	-1.17033	0.136425	0.00318279	15.2458	30.2307	Down
NCU05662	-1.0307	0.344532	0.0283982	11.6088	21.8965	Down
NCU05761	-1.39376	0.0324834	0.000127945	15.1207	36.6995	Down
NCU05762	-1.12573	0.196045	0.00756559	13.5706	26.8073	Down
NCU05764	-1.39028	0.0830783	0.00093922	11.736	27.2702	Down
NCU05767	-1.20011	0.120618	0.00251323	14.0016	29.535	Down
NCU05769	-1.08324	0.115887	0.0020734	18.6114	35.6293	Down
NCU05773	-1.16745	0.110572	0.00195461	15.7439	31.1166	Down
NCU05794	-1.21094	0.0302031	0.000101308	21.3713	45.111	Down
NCU05821	-1.30738	0.0530856	0.000332808	16.2845	36.1315	Down
NCU05845	-1.12369	0.103538	0.00168215	17.8197	34.6051	Down
NCU05896	-1.08891	0.164818	0.00511564	15.2717	29.0656	Down
NCU05911	-1.62638	0.0274459	5.35942e-05	11.201	31.2229	Down
NCU05947	-1.71205	0.0171375	1.40904e-05	12.2928	34.2824	Down
NCU05953	-1.05504	0.247779	0.0137768	13.5019	24.4125	Down
NCU05962	-1.47463	0.00628187	1.93686e-06	19.8574	49.8472	Down
NCU06019	-1.23256	0.150162	0.0041559	12.2551	25.6164	Down
NCU06064	-1.10432	0.0741504	0.000693493	21.7604	41.7986	Down
NCU06096	-1.12751	0.247232	0.0128118	12.0932	22.3509	Down
NCU06161	-1.41906	0.0367553	0.000177544	14.1088	33.6762	Down
NCU06163	-1.18805	0.0938779	0.00134111	16.5997	33.8664	Down
NCU06221	-1.24448	0.0938779	0.0013405	15.0633	31.5535	Down
NCU06350	-1.20265	0.120618	0.00251323	14.7379	29.277	Down
NCU06476	-1.00205	0.125706	0.00264847	20.2777	38.6979	Down
NCU06514	-1.22076	0.0938779	0.0013405	14.9101	31.1264	Down
NCU06571	-1.04122	0.210376	0.00925395	15.0695	26.9379	Down
NCU06572	-1.07419	0.247779	0.0137768	13.4917	24.8515	Down
NCU06640	-1.16178	0.363016	0.0327912	8.455	16.2266	Down
NCU06794	-1.11098	0.085705	0.00101295	19.7659	38.3521	Down
NCU06861	-1.15782	0.178604	0.00604981	13.3364	25.6845	Down
NCU06885	-1.25398	0.085705	0.00104819	16.0514	33.5552	Down
NCU06887	-1.0535	0.103538	0.00171205	21.5761	39.7716	Down
NCU06897	-1.41375	0.0275193	5.93943e-05	16.4754	39.8916	Down
NCU06898	-1.21084	0.103538	0.00172387	15.9448	32.2387	Down
NCU06899	-1.42146	0.0533131	0.000345193	13.1164	32.4933	Down
NCU06902	-1.25331	0.0548098	0.000388682	17.8267	38.199	Down
NCU06916	-1.1021	0.0530856	0.000326186	24.2863	47.1118	Down
NCU06955	-1.06694	0.136425	0.0030487	17.8393	32.6703	Down
NCU07031	-1.09526	0.14771	0.00394702	16.5744	30.6991	Down
NCU07043	-1.22403	0.085705	0.00104819	15.3568	33.0733	Down
NCU07044	-1.15998	0.0894128	0.00118301	17.3054	34.5922	Down
NCU07048	-1.50869	0.0324834	0.000136878	13.1697	32.5408	Down
NCU07084	-1.43174	0.0384625	0.000197649	13.85	32.9153	Down
NCU07085	-1.12968	0.170226	0.00531847	13.1184	26.0305	Down
NCU07090	-1.57811	0.0270286	4.16679e-05	13.1692	33.9982	Down
NCU07091	-1.25726	0.0894128	0.00118543	14.7507	32.3639	Down
NCU07095	-1.4569	0.0302031	9.10142e-05	14.559	36.3059	Down
NCU07107	-1.18636	0.0966925	0.00152045	16.1949	33.033	Down
NCU07146	-1.04265	0.144863	0.00370719	18.2559	33.6299	Down
NCU07147	-1.02819	0.204982	0.00853216	17.0663	30.634	Down
NCU07202	-1.09942	0.142397	0.00346845	15.9078	31.9982	Down
NCU07211	-1.0649	0.150425	0.00422056	17.6963	33.4282	Down
NCU07215	-1.26816	0.0662644	0.000558446	16.0539	34.9415	Down
NCU07216	-1.60968	0.0270286	3.81161e-05	13.0064	35.481	Down
NCU07217	-1.28648	0.085705	0.00101687	14.1414	30.4686	Down
NCU07218	-1.52235	0.0324834	0.000136878	12.5386	32.1847	Down
NCU07219	-1.23121	0.0938779	0.0013405	15.2858	31.1683	Down
NCU07224	-1.02951	0.196045	0.0074824	16.9878	31.5086	Down
NCU07226	-1.27675	0.0820747	0.000902569	14.3765	30.8437	Down
NCU07228	-1.17186	0.159614	0.00467645	13.5506	27.5349	Down
NCU07239	-1.11868	0.374937	0.035567	9.97892	18.3445	Down
NCU07243	-1.26863	0.0662644	0.000558446	16.9829	35.0835	Down
NCU07244	-1.34555	0.0318371	0.000114522	15.9394	37.5689	Down
NCU07371	-1.12901	0.0966925	0.00148148	18.4601	35.7148	Down
NCU07449	-1.15576	0.0966925	0.00152045	16.2266	32.6593	Down
NCU07455	-1.23922	0.159614	0.00471245	11.6186	25.0056	Down
NCU07480	-1.0266	0.19332	0.00711291	15.6026	29.0871	Down
NCU07510	-1.46606	0.0520702	0.000299684	12.0669	29.1683	Down
NCU07573	-1.11302	0.196045	0.00756559	13.1968	26.5526	Down
NCU07594	-1.38244	0.0533131	0.000345193	13.7916	32.5348	Down
NCU07595	-1.38336	0.0682258	0.000596012	13.5046	31.5817	Down
NCU07596	-1.22412	0.117201	0.00221635	14.6795	30.4763	Down
NCU07601	-1.17473	0.110572	0.00195461	14.8684	31.079	Down
NCU07602	-1.20657	0.048682	0.000270178	19.6179	40.5823	Down
NCU07603	-1.09987	0.14771	0.00394702	16.3866	31.038	Down
NCU07606	-1.04533	0.197549	0.0081115	15.133	28.4587	Down
NCU07616	-1.10846	0.374937	0.035567	9.37443	17.9233	Down
NCU07627	-1.12233	0.110572	0.00191032	17.5585	34.3075	Down
NCU07628	-1.19156	0.0663549	0.000566029	18.5284	38.1413	Down
NCU07629	-1.21442	0.0773998	0.00081934	16.2041	34.5053	Down
NCU07630	-1.25066	0.0592803	0.000438662	16.9715	36.5948	Down
NCU07631	-1.05343	0.144863	0.00370719	18.9438	34.3922	Down
NCU07634	-1.0817	0.136425	0.0030487	17.2991	32.6411	Down
NCU07635	-1.12178	0.335049	0.0270312	10.1828	20.0819	Down
NCU07636	-1.29066	0.0894128	0.00114518	13.3208	29.066	Down
NCU07637	-1.01368	0.245797	0.0126814	15.4947	27.5374	Down
NCU07653	-1.07004	0.171858	0.00547542	16.5243	31.1145	Down
NCU07744	-1.30179	0.218917	0.00998352	8.84372	18.9532	Down
NCU07780	-1.03193	0.196045	0.0074824	17.0961	31.5116	Down
NCU07797	-1.26542	0.0773998	0.000800832	15.0977	31.9772	Down
NCU07799	-1.27965	0.0388025	0.000207372	17.7439	39.9336	Down
NCU07815	-1.05798	0.197549	0.0081115	14.7919	28.0682	Down
NCU07847	-1.06249	0.335049	0.0270312	11.1607	20.0385	Down
NCU07902	-1.19623	0.0966925	0.00152045	16.3999	33.17	Down
NCU07918	-1.01787	0.159614	0.00480646	17.6028	31.6747	Down
NCU07976	-1.16021	0.0938779	0.00134111	17.2079	33.9952	Down
NCU07977	-1.30768	0.0548098	0.000374284	15.7285	34.6081	Down
NCU07978	-1.13234	0.217544	0.00983755	12.882	24.9056	Down
NCU08078	-1.1573	0.196045	0.00756559	13.5068	26.8975	Down
NCU08105	-1.34056	0.0966925	0.0014503	12.2417	27.6843	Down
NCU08107	-1.07588	0.224379	0.0105617	14.3098	26.4557	Down
NCU08180	-1.14744	0.103538	0.00172387	15.7917	31.6945	Down
NCU08188	-1.09512	0.217544	0.00983755	13.1516	24.5849	Down
NCU08204	-1.1008	0.136425	0.0030487	16.929	32.8617	Down
NCU08207	-1.03199	0.155997	0.00444101	19.5314	35.2715	Down
NCU08208	-1.03403	0.304927	0.0216551	12.8735	23.8201	Down
NCU08220	-1.17242	0.0699355	0.00063251	20.3058	40.1332	Down
NCU08221	-1.02787	0.196045	0.0074824	17.3249	31.4572	Down
NCU08236	-1.01764	0.155997	0.00444101	19.2281	34.9626	Down
NCU08238	-1.21628	0.117201	0.00221635	14.6612	30.3827	Down
NCU08239	-1.26423	0.103538	0.00171345	13.5792	29.3094	Down
NCU08241	-1.40306	0.0589634	0.000430257	12.8544	30.2465	Down
NCU08242	-1.21944	0.0966925	0.00151566	14.5853	30.063	Down
NCU08243	-1.03104	0.217544	0.00973297	16.1965	29.714	Down
NCU08244	-1.52731	0.029523	7.59207e-05	12.7781	32.9874	Down
NCU08254	-1.07625	0.120618	0.00235718	18.3301	34.5394	Down
NCU08256	-1.58584	0.085705	0.00097805	8.6422	22.5685	Down
NCU08263	-1.32032	0.0649336	0.000530988	14.3596	31.8045	Down
NCU08305	-1.07596	0.397872	0.0408504	9.27809	17.2435	Down
NCU08321	-1.00275	0.419187	0.0492856	10.156	18.059	Down
NCU08361	-1.49754	0.0324834	0.000123875	13.0645	32.9829	Down
NCU08383	-1.37982	0.0759569	0.00074942	13.2431	29.7967	Down
NCU08431	-1.05137	0.265073	0.0157464	12.8558	23.5546	Down
NCU08442	-1.08663	0.196045	0.00756559	14.0668	26.0147	Down
NCU08508	-1.07914	0.397872	0.0408504	9.07675	17.3317	Down
NCU08521	-1.08621	0.23336	0.0112243	12.6343	23.2207	Down
NCU08538	-1.02263	0.231423	0.0111074	15.7444	28.7591	Down
NCU08548	-1.26998	0.159614	0.00471245	11.6026	24.9274	Down
NCU08557	-1.07561	0.289488	0.0191048	10.3663	19.354	Down
NCU08558	-1.12262	0.177717	0.0058265	15.0862	28.7888	Down
NCU08569	-1.22548	0.085705	0.00104819	15.8107	32.88	Down
NCU08571	-1.44799	0.029523	8.19239e-05	15.4333	37.2583	Down
NCU08573	-1.18861	0.0894128	0.00118301	17.6783	35.3595	Down
NCU08574	-1.13592	0.117201	0.00216979	16.5437	32.6007	Down
NCU08576	-1.28251	0.110572	0.00193668	13.2582	28.611	Down
NCU08630	-1.39688	0.0344484	0.00015932	15.3926	35.2114	Down
NCU08635	-1.32838	0.0938779	0.00128909	12.9283	28.5844	Down
NCU08638	-1.26356	0.136606	0.00323185	13.373	27.85	Down
NCU08639	-1.13302	0.177717	0.0058265	14.3934	28.4207	Down
NCU08640	-1.09411	0.196045	0.00756559	14.2233	26.4917	Down
NCU08645	-1.29239	0.0773998	0.000800832	14.6107	31.8521	Down
NCU08646	-1.39316	0.0830783	0.00093922	11.3749	27.4027	Down
NCU08670	-1.08548	0.120618	0.00235718	18.3915	35.157	Down
NCU08697	-1.03275	0.180152	0.00623959	16.1591	30.1729	Down
NCU08724	-1.07552	0.108227	0.00182418	19.6029	36.4817	Down
NCU08745	-1.03443	0.120618	0.00251649	20.4523	36.8262	Down
NCU08757	-1.12	0.14771	0.00394702	16.1825	31.5595	Down
NCU08765	-1.11381	0.177717	0.0058265	14.6758	28.3483	Down
NCU08769	-1.07523	0.224379	0.0105617	13.7424	26.785	Down
NCU08789	-1.0076	0.14771	0.00390106	19.658	35.4757	Down
NCU08790	-1.09398	0.197549	0.0081115	14.6499	28.7509	Down
NCU08799	-1.05076	0.144863	0.00370719	18.2707	33.7788	Down
NCU08805	-1.02496	0.304927	0.0216551	12.7106	23.7691	Down
NCU08812	-1.07103	0.144863	0.00370719	18.3667	34.1707	Down
NCU08830	-1.44105	0.0630583	0.00047958	11.7682	29.1715	Down
NCU08833	-1.66917	0.0238783	2.45409e-05	12.8009	34.2401	Down
NCU08866	-1.04721	0.180152	0.00623959	16.3061	30.5925	Down
NCU08881	-1.02997	0.245797	0.0126814	14.9141	27.3962	Down
NCU08883	-1.14518	0.196045	0.00756559	13.5784	26.7122	Down
NCU08918	-1.37807	0.0548098	0.000385577	13.2466	30.9046	Down
NCU08969	-1.05533	0.159614	0.00480646	17.1407	31.9064	Down
NCU08970	-1.43639	0.0270286	3.78725e-05	16.5426	39.3119	Down
NCU09028	-1.23898	0.178604	0.0060575	11.0216	22.6992	Down
NCU09036	-1.04335	0.335049	0.0270312	10.4519	19.874	Down
NCU09046	-1.16669	0.0966925	0.00152045	16.2941	32.6477	Down
NCU09053	-1.33903	0.073092	0.00066857	13.4981	30.4117	Down
NCU09060	-1.33806	0.0384625	0.000196235	16.6608	37.0783	Down
NCU09147	-1.113	0.159614	0.00467645	14.0858	26.9388	Down
NCU09148	-1.23413	0.0773998	0.00081934	16.5999	35.0203	Down
NCU09149	-1.7461	0.0135264	6.95089e-06	12.2681	36.3839	Down
NCU09150	-1.08156	0.108227	0.00182418	18.3424	36.4092	Down
NCU09166	-1.18937	0.144863	0.00361767	14.4153	29.7089	Down
NCU09177	-1.17419	0.0966925	0.00152045	16.2759	33.1369	Down
NCU09179	-1.33982	0.0649336	0.000530988	14.4924	31.7119	Down
NCU09180	-1.11107	0.142397	0.00346845	17.2221	32.5693	Down
NCU09184	-1.05189	0.19332	0.00711291	15.706	29.26	Down
NCU09276	-1.13126	0.117201	0.00216979	16.6406	32.7239	Down
NCU09277	-1.26671	0.0388025	0.000207372	18.8421	40.1852	Down
NCU09339	-1.23413	0.110572	0.00195461	14.6212	31.6477	Down
NCU09404	-1.40127	0.120618	0.00230689	9.93562	23.992	Down
NCU09413	-1.01806	0.231423	0.0111074	15.945	28.6371	Down
NCU09418	-1.0925	0.316625	0.0235923	11.2723	21.0431	Down
NCU09448	-1.54517	0.208206	0.00904589	5.74596	16.1138	Down
NCU09451	-1.08981	0.247779	0.0137768	13.3002	25.003	Down
NCU09452	-1.05686	0.136606	0.00325721	19.2417	35.3719	Down
NCU09453	-1.25532	0.103538	0.00171345	13.4898	29.5998	Down
NCU09490	-1.06844	0.224379	0.0105617	14.3626	26.6275	Down
NCU09584	-1.20097	0.120618	0.00251323	14.1017	29.405	Down
NCU09590	-1.42164	0.0302031	0.000100997	14.4515	34.577	Down
NCU09591	-1.24294	0.144863	0.00366491	13.2709	26.7805	Down
NCU09603	-1.20561	0.120618	0.00251323	14.1881	29.6148	Down
NCU09605	-1.03778	0.19332	0.00711291	15.6891	28.9784	Down
NCU09612	-1.10996	0.217544	0.00983755	12.5817	24.7954	Down
NCU09619	-1.02253	0.204982	0.00853216	16.5267	30.6258	Down
NCU09623	-1.13584	0.156686	0.00449285	15.523	30.5277	Down
NCU09645	-1.01829	0.217544	0.00973297	16.7691	29.1498	Down
NCU09650	-1.12712	0.120618	0.00246493	16.7964	32.078	Down
NCU09660	-1.04292	0.197549	0.0081115	15.6944	28.5001	Down
NCU09665	-1.27669	0.074187	0.000710343	15.1421	33.4068	Down
NCU09685	-1.14161	0.136425	0.00318279	14.8219	30.3785	Down
NCU09726	-1.15711	0.0966925	0.00148148	18.454	36.298	Down
NCU09761	-1.27022	0.110572	0.00193668	12.9409	28.1116	Down
NCU09766	-1.25984	0.136606	0.00323185	12.8878	27.7022	Down
NCU09836	-1.27689	0.0699355	0.000629907	15.5627	33.8708	Down
NCU09924	-1.08653	0.196045	0.00756559	14.1736	26.1052	Down
NCU09951	-1.50857	0.029523	6.90708e-05	13.1549	34.0801	Down
NCU09952	-1.14611	0.0699355	0.00063251	20.5806	39.8185	Down
NCU09956	-1.21127	0.0938779	0.0013405	15.1549	31.0091	Down
NCU09961	-1.65335	0.0169304	1.21801e-05	13.0981	35.8726	Down
NCU09965	-1.0317	0.120618	0.00251649	19.8385	36.8005	Down
NCU09969	-1.12685	0.0966925	0.00148148	20.2479	36.3215	Down
NCU09970	-1.18746	0.178604	0.00604981	12.9843	25.7148	Down
NCU09978	-1.1073	0.136425	0.0030487	17.1444	33.0938	Down
NCU09981	-1.31859	0.0530856	0.000332808	16.1965	36.0544	Down
NCU10027	-1.15501	0.150162	0.00411274	14.6532	28.7996	Down
NCU10039	-1.01222	0.289488	0.0189281	13.8881	24.3533	Down
NCU10092	-1.1684	0.305439	0.0218484	9.98822	18.6994	Down
NCU10106	-1.04357	0.247779	0.0137768	13.0502	24.1809	Down
NCU10220	-1.016	0.344532	0.0283982	12.2137	21.5848	Down
NCU10396	-1.08781	0.374937	0.035567	10.2707	17.7869	Down
NCU10404	-1.25325	0.178604	0.0060575	10.7076	22.2793	Down
NCU10427	-1.13579	0.117201	0.00216979	17.1337	33.3636	Down
NCU10429	-1.10547	0.217544	0.00983755	12.6	24.2308	Down
NCU10502	-1.0811	0.0888009	0.00109518	20.2784	40.4032	Down
NCU10605	-1.04236	0.316625	0.0235923	11.4829	20.6457	Down
NCU10684	-1.13526	0.14771	0.00394702	16.4475	31.6395	Down
NCU10697	-1.25769	0.159614	0.00471245	11.6642	24.9426	Down
NCU10799	-1.0787	0.156686	0.00449285	15.2855	29.7541	Down
NCU10932	-1.15599	0.085705	0.00104361	17.5297	35.9118	Down
NCU10954	-1.19553	0.247232	0.0131599	10.0071	19.4945	Down
NCU11006	-1.33347	0.0682258	0.000596012	14.1359	30.781	Down
NCU11038	-1.09241	0.164818	0.00511564	15.0247	28.8001	Down
NCU11211	-1.48611	0.0520702	0.000299684	12.183	29.5821	Down
NCU11286	-1.05776	0.159614	0.00480646	17.3871	32.2527	Down
NCU11309	-1.00521	0.258608	0.0144852	14.7373	26.4475	Down
NCU11331	-1.36918	0.0274459	5.32665e-05	17.672	40.6945	Down
NCU12028	-1.10971	0.247232	0.0128118	11.9623	22.7031	Down
NCU12036	-1.24289	0.150162	0.0041559	12.5211	25.8374	Down
NCU12045	-1.88628	0.0148389	9.15038e-06	9.53032	31.2181	Down
NCU12067	-1.13807	0.110572	0.00191032	16.9082	33.9986	Down
NCU12077	-1.52476	0.0270286	3.47914e-05	14.2677	35.8534	Down
NCU12078	-1.12736	0.136425	0.00318279	15.2159	30.1257	Down
NCU12086	-1.04971	0.131383	0.00286262	19.1162	36.1793	Down
NCU12099	-1.02877	0.344532	0.0283982	12.3966	22.0269	Down
NCU12144	-1.14472	0.129766	0.00280071	16.03	31.4773	Down
NCU16307	-1.44508	0.029523	8.19239e-05	15.9098	37.041	Down
NCU16321	-1.05393	0.136606	0.00325721	18.897	35.0575	Down
NCU16357	-1.16484	0.150162	0.00411274	14.7823	28.7027	Down
NCU16363	-1.30861	0.074187	0.000710343	15.1893	33.3664	Down
NCU16452	-1.03294	0.419187	0.0492856	10.77	18.245	Down
NCU16488	-1.29937	0.0820747	0.000902569	13.9381	31.2706	Down
NCU16494	-1.20364	0.120618	0.00251323	14.6858	29.6005	Down
NCU16509	-1.60393	0.0270286	4.16679e-05	12.3648	34.3798	Down
NCU16529	-1.42824	0.029523	8.19239e-05	15.2093	37.0787	Down
NCU16567	-1.05957	0.284896	0.0180073	12.6744	22.389	Down
NCU16600	-1.04165	0.19332	0.00711291	15.8267	29.2275	Down
NCU16616	-1.40255	0.0589634	0.000430257	12.8564	30.487	Down
NCU16664	-1.01682	0.275805	0.0165539	13.9671	25.7527	Down
NCU16702	-1.0253	0.247779	0.0137768	13.4339	24.2496	Down
NCU16703	-1.00108	0.245797	0.0126814	15.7208	27.3199	Down
NCU16705	-1.16777	0.085705	0.00104361	17.5985	35.4408	Down
NCU16706	-1.17718	0.0894128	0.00118301	16.8278	34.9287	Down
NCU16707	-1.00228	0.155997	0.00444101	19.8798	35.1723	Down
NCU16710	-1.29296	0.0938779	0.00128909	12.3947	28.0417	Down
NCU16716	-1.21076	0.117201	0.00221635	14.3763	30.1023	Down
NCU16720	-1.18209	0.120618	0.00251323	14.4251	29.3697	Down
NCU16723	-1.01476	0.231423	0.0111074	15.3699	28.1763	Down
NCU16740	-1.03305	0.363016	0.0325544	11.6366	21.1717	Down
NCU16745	-1.07467	0.238499	0.0120598	13.3939	25.4079	Down
NCU16750	-1.08933	0.120618	0.00235718	18.3874	34.607	Down
NCU16807	-1.04405	0.247779	0.0137768	12.5454	24.204	Down
NCU16846	-1.1839	0.0966925	0.00152045	16.263	33.3753	Down
NCU16916	-1.16226	0.0894128	0.00118301	17.6705	35.0989	Down
NCU16917	-1.18378	0.103538	0.00172387	16.0667	32.5198	Down
NCU16939	-1.34849	0.0630171	0.00047279	14.9764	33.5789	Down
NCU16940	-1.10782	0.0773998	0.000786738	20.9193	40.4104	Down
NCU16961	-1.18806	0.117201	0.00221635	14.5218	29.9244	Down
NCU16967	-1.05994	0.316625	0.0235923	11.9464	20.9754	Down
NCU17038	-1.69022	0.0072914	2.99749e-06	13.4938	39.6079	Down
NCU17043	-1.0048	0.289488	0.0189281	14.2308	24.9249	Down
NCU17044	-1.21344	0.131383	0.00284996	13.505	28.1228	Down
NCU17143	-1.19394	0.305439	0.0218484	9.47048	19.0288	Down
NCU17145	-1.364	0.177379	0.00572882	8.97135	19.5357	Down
NCU17161	-1.2163	0.085705	0.00104819	15.0744	33.1914	Down
NCU17170	-1.19243	0.208206	0.00891508	11.2192	22.4858	Down
NCU17172	-1.10724	0.101423	0.00160526	19.8643	37.985	Down
NCU17185	-1.16084	0.208206	0.00891508	11.467	22.6183	Down
NCU17202	-1.27873	0.0530856	0.000332808	16.6592	35.7522	Down
NCU17249	-1.03728	0.159614	0.00480646	17.8331	32.0919	Down
NCU17263	-1.01212	0.164571	0.00505721	18.611	33.8055	Down
NCU17267	-1.12244	0.206207	0.00862551	13.2203	25.1781	Down
NCU17268	-1.33827	0.136425	0.0031523	10.8666	24.951	Down
NCU17270	-1.06149	0.180152	0.00623959	16.92	30.5624	Down
NCU17271	-1.36892	0.115683	0.00205686	10.6764	24.3577	Down
NCU17282	-1.18508	0.150162	0.00411274	14.2805	28.6315	Down
NCU00003	-0.0219265	1	1	22.1896	20.2603	Other
NCU00004	0.215741	0.868013	0.542698	42.442	33.274	Other
NCU00005	0.111607	1	0.849729	26.877	22.3129	Other
NCU00006	0.176159	0.927376	0.654405	36.1241	28.9463	Other
NCU00007	0.129503	0.975848	0.76754	36.8291	31.6021	Other
NCU00008	0.0964377	1	0.920868	32.1022	26.5708	Other
NCU00010	0.0661452	1	0.872585	36.7796	31.9826	Other
NCU00011	-0.29723	0.946571	0.694834	13.886	15.3069	Other
NCU00014	0.246975	0.826214	0.465725	37.0352	28.2076	Other
NCU00015	-0.432977	0.764937	0.363522	17.4096	20.5782	Other
NCU00017	-0.604642	0.541103	0.108166	21.1395	29.4225	Other
NCU00018	0.534999	0.473106	0.0703095	55.3255	34.6812	Other
NCU00019	0.176528	0.929903	0.659151	37.1932	29.5746	Other
NCU00021	0.442963	0.626286	0.178875	43.9962	29.3089	Other
NCU00022	-0.410897	0.687057	0.253061	24.7794	29.6839	Other
NCU00023	0.261639	0.81206	0.438829	39.6537	29.7647	Other
NCU00024	-0.334739	0.798785	0.419259	22.7625	25.5901	Other
NCU00025	0.219814	0.896276	0.594508	33.4411	26.6051	Other
NCU00026	0.0495858	1	1	24.9362	22.2588	Other
NCU00027	0.0342355	1	0.979067	27.7017	24.4718	Other
NCU00028	-0.00153187	1	1	25.7442	23.4742	Other
NCU00029	-0.0338546	1	1	28.0797	26.2108	Other
NCU00030	0.240569	0.89921	0.600336	26.8622	20.5755	Other
NCU00032	-0.116274	0.977026	0.771479	26.052	26.0157	Other
NCU00033	-0.862492	0.504571	0.0881763	10.7383	17.9802	Other
NCU00034	0.337533	0.795739	0.411936	28.7982	21.4066	Other
NCU00035	-0.0945223	1	0.956865	25.3622	24.6603	Other
NCU00037	0.251411	0.83588	0.478602	38.8529	29.5808	Other
NCU00038	0.409243	0.694332	0.260107	40.1694	27.4488	Other
NCU00039	-0.148518	0.942419	0.687201	32.8341	32.4111	Other
NCU00040	0.656994	0.327331	0.0259512	54.4359	31.1272	Other
NCU00041	0.247093	0.847391	0.501816	42.5045	32.9541	Other
NCU00042	-0.37351	0.729552	0.310672	24.1768	28.1262	Other
NCU00043	0.291879	0.797178	0.413992	42.3013	31.3294	Other
NCU00045	0.349929	0.694332	0.257088	48.9021	34.8991	Other
NCU00046	0.42659	0.599921	0.152829	47.0548	31.736	Other
NCU00047	-0.690524	0.653792	0.207224	12.4761	17.1032	Other
NCU00048	-0.850377	0.504571	0.0881763	11.192	18.0654	Other
NCU00050	0.0830446	1	0.92215	32.4835	27.8757	Other
NCU00051	-0.180979	0.945014	0.692978	23.3911	23.2884	Other
NCU00052	-0.270456	0.821192	0.452508	32.4843	34.8971	Other
NCU00054	-0.252936	0.807509	0.429345	34.5542	37.2626	Other
NCU00055	-0.0568032	1	0.965379	39.8602	37.6042	Other
NCU00056	-0.253247	0.859223	0.526675	23.1638	25.19	Other
NCU00057	0.280801	0.803937	0.425549	37.5114	27.9293	Other
NCU00059	0.178905	0.944983	0.691408	32.6149	25.7273	Other
NCU00060	0.370524	0.711742	0.288574	39.6861	27.8474	Other
NCU00061	-0.349049	0.750626	0.343707	23.5823	26.9764	Other
NCU00064	0.267612	0.823877	0.457154	42.141	31.983	Other
NCU00065	0.394947	0.705465	0.281533	38.6885	26.5138	Other
NCU00066	0.559703	0.477317	0.0717377	49.3149	30.1551	Other
NCU00067	0.0803697	1	0.978666	26.2099	22.8199	Other
NCU00068	0.454123	0.571409	0.129314	53.6106	35.5723	Other
NCU00069	-0.48045	0.751937	0.346679	12.9145	15.525	Other
NCU00070	0.330593	0.742562	0.33295	41.1983	29.4127	Other
NCU00072	-0.0438734	1	1	24.9958	23.4627	Other
NCU00073	0.54011	0.541103	0.107957	45.4524	28.1699	Other
NCU00074	0.452317	0.711742	0.287915	29.2395	20.0274	Other
NCU00075	0.263998	0.824162	0.458922	35.351	26.9709	Other
NCU00076	0.0456733	1	0.981353	35.4087	30.7602	Other
NCU00077	-0.018398	1	1	34.1451	31.5165	Other
NCU00078	-0.0833352	1	0.891972	24.4593	24.0107	Other
NCU00079	0.0289058	1	1	27.175	24.7665	Other
NCU00080	-0.0560178	1	1	28.7575	27.4907	Other
NCU00081	0.0539012	1	0.982127	37.7664	33.2377	Other
NCU00082	-0.777411	0.589997	0.145244	12.272	18.3359	Other
NCU00083	0.499492	0.547871	0.112579	46.4268	29.4599	Other
NCU00084	-0.532634	0.599921	0.153754	22.1607	28.7774	Other
NCU00085	-0.355512	0.775998	0.38763	19.3508	22.1543	Other
NCU00086	-0.600621	0.547871	0.114088	20.7991	27.2414	Other
NCU00087	0.0993135	1	0.916606	28.3029	23.9753	Other
NCU00088	0.0493067	1	0.979067	26.8957	24.101	Other
NCU00089	0.210309	0.924758	0.649456	35.5297	27.4503	Other
NCU00090	0.223357	0.907006	0.610948	37.9466	29.2719	Other
NCU00091	-0.0959335	0.989313	0.793077	32.3845	31.2963	Other
NCU00092	-0.315901	0.807051	0.428782	23.6634	26.0994	Other
NCU00093	-0.384396	0.717854	0.297962	26.5877	30.7942	Other
NCU00095	0.479199	0.50222	0.0856187	53.1704	34.5258	Other
NCU00096	-0.610889	0.467284	0.0684358	25.4945	35.4073	Other
NCU00097	0.638404	0.383938	0.0370127	52.8704	30.2076	Other
NCU00100	0.0465794	1	1	38.855	34.0115	Other
NCU00101	-0.00310102	1	1	28.1503	25.7521	Other
NCU00102	0.0287619	1	1	34.7657	30.7778	Other
NCU00103	0.594859	0.509207	0.0916651	39.2511	23.0442	Other
NCU00104	0.0159808	1	1	33.4698	30.417	Other
NCU00105	0.0638518	1	0.916606	29.0313	24.4487	Other
NCU00106	0.224959	0.875239	0.553119	36.0576	27.8429	Other
NCU00107	-0.0700747	1	0.884921	22.5243	21.035	Other
NCU00108	0.178141	0.89921	0.600217	34.8447	28.2993	Other
NCU00109	0.21076	0.89921	0.600217	35.6017	27.6778	Other
NCU00110	0.217348	0.871443	0.546958	35.1809	27.0021	Other
NCU00111	-0.507336	0.699201	0.265305	16.4799	20.7549	Other
NCU00112	-0.026359	1	1	33.5797	30.8484	Other
NCU00114	0.22321	0.89242	0.58232	32.6959	25.1599	Other
NCU00115	0.607703	0.415423	0.0467084	47.3384	27.8899	Other
NCU00116	-0.0329655	1	1	25.5913	23.3383	Other
NCU00117	0.11508	1	0.824251	39.5607	33.104	Other
NCU00118	-0.0296984	1	1	36.9696	33.5471	Other
NCU00119	0.135269	0.947007	0.705048	35.7045	29.1573	Other
NCU00120	-0.0971156	1	0.849324	33.2547	31.8836	Other
NCU00121	0.410944	0.645738	0.199628	43.0759	29.6955	Other
NCU00122	0.154865	0.970985	0.745952	32.4602	26.0018	Other
NCU00123	-1.00225	0.462482	0.0653051	9.36643	16.1736	Other
NCU00124	0.46344	0.569039	0.126256	48.9745	32.2024	Other
NCU00125	0.0157828	1	1	29.6899	26.4777	Other
NCU00126	0.143669	0.971664	0.749969	32.9007	26.7909	Other
NCU00127	-0.0091081	1	1	30.2702	28.3521	Other
NCU00128	-0.404058	0.65808	0.213386	30.1785	36.2753	Other
NCU00129	-0.431314	0.687057	0.251985	21.5199	26.0463	Other
NCU00130	-0.290796	0.873566	0.549908	19.4336	21.4967	Other
NCU00132	-0.162675	0.942419	0.68652	20.9984	22.1478	Other
NCU00133	0.44045	0.599921	0.152829	47.6245	31.5997	Other
NCU00134	0.268438	0.823877	0.457154	42.8754	32.0972	Other
NCU00135	-0.132497	0.97559	0.762624	25.3045	24.2237	Other
NCU00136	0.694963	0.308513	0.0226813	50.5005	27.8866	Other
NCU00137	0.166032	0.951979	0.711098	23.7307	19.8417	Other
NCU00138	-0.155494	0.96659	0.73741	33.1103	31.9556	Other
NCU00142	0.153496	0.96659	0.7373	29.7908	24.3466	Other
NCU00143	-0.905288	0.327331	0.0259339	16.1097	26.1439	Other
NCU00144	-0.325584	0.807051	0.428782	23.4218	26.3717	Other
NCU00145	-0.1267	0.998183	0.815781	22.0164	21.4244	Other
NCU00146	-0.272975	0.886984	0.576311	21.7942	24.6497	Other
NCU00147	-0.479839	0.676427	0.231181	18.6683	24.0574	Other
NCU00148	-0.00352547	1	1	31.563	29.1668	Other
NCU00149	-0.557343	0.580246	0.137122	22.8203	30.2297	Other
NCU00150	-0.456484	0.676427	0.231181	19.7379	23.9827	Other
NCU00151	0.223306	0.851477	0.508263	36.4489	28.2482	Other
NCU00152	0.552065	0.41816	0.0471881	60.3946	36.746	Other
NCU00153	0.41219	0.711742	0.289464	35.115	23.6638	Other
NCU00154	-0.11396	1	0.83355	27.055	26.3102	Other
NCU00155	0.392543	0.654959	0.211323	46.4578	31.5825	Other
NCU00157	-0.0736827	1	0.847004	31.7896	30.5745	Other
NCU00158	0.335235	0.823877	0.456338	29.1541	20.8377	Other
NCU00159	0.474179	0.607514	0.161923	37.7183	24.3758	Other
NCU00160	-0.0689609	1	0.899629	29.4452	27.9086	Other
NCU00161	-0.0567802	1	0.959912	29.6699	27.9969	Other
NCU00162	0.364851	0.701237	0.274297	37.9481	26.1973	Other
NCU00163	-0.0674315	1	0.894049	26.0494	25.0997	Other
NCU00164	0.759156	0.196045	0.00724972	57.9807	30.581	Other
NCU00166	-0.351261	0.798785	0.419259	21.207	25.3652	Other
NCU00167	0.211329	0.908959	0.616	37.9399	30.3072	Other
NCU00168	0.268913	0.863865	0.533836	33.0014	24.6661	Other
NCU00169	0.308914	0.754361	0.35235	38.5353	28.2159	Other
NCU00170	0.368124	0.735794	0.322298	34.8345	24.1996	Other
NCU00171	0.17088	0.967696	0.741734	31.1749	24.8286	Other
NCU00172	0.217238	0.907006	0.610948	37.8168	29.3333	Other
NCU00173	-0.195796	0.915261	0.629572	21.7564	23.1532	Other
NCU00175	-0.623027	0.571409	0.12881	18.8665	26.6008	Other
NCU00176	-0.612244	0.654048	0.20956	14.9665	19.8942	Other
NCU00177	0.261184	0.816451	0.445139	41.2674	30.745	Other
NCU00178	0.122378	1	0.85528	28.871	24.0985	Other
NCU00179	-0.849484	0.441487	0.0578479	14.6437	22.886	Other
NCU00180	0.189718	0.932432	0.663707	38.1694	30.2421	Other
NCU00181	0.249224	0.847391	0.501739	36.2984	27.0723	Other
NCU00182	0.37943	0.699201	0.266837	40.6284	28.5975	Other
NCU00183	-0.329928	0.845954	0.499052	20.5208	22.7935	Other
NCU00184	0.0401277	1	0.981072	33.7795	29.9113	Other
NCU00185	-0.686402	0.428278	0.0526434	24.8499	35.2239	Other
NCU00186	-0.471425	0.662244	0.216097	21.0899	25.9203	Other
NCU00187	0.360273	0.729552	0.312175	37.2022	26.9136	Other
NCU00188	0.276571	0.803937	0.42593	44.2483	33.0296	Other
NCU00189	-0.920767	0.478427	0.0767223	10.4861	16.9994	Other
NCU00192	-0.668707	0.478427	0.0763629	19.5839	27.0804	Other
NCU00193	-0.483188	0.626559	0.18089	23.1024	28.6392	Other
NCU00194	-0.0320482	1	1	29.5044	27.0093	Other
NCU00195	0.164952	0.96422	0.732629	29.4156	23.4136	Other
NCU00196	0.212825	0.901955	0.605691	36.7503	28.6799	Other
NCU00197	-0.7368	0.574792	0.131204	11.3485	16.7317	Other
NCU00198	-0.430968	0.737135	0.325006	18.2003	21.5463	Other
NCU00199	0.326314	0.738024	0.327106	45.8314	32.9395	Other
NCU00200	0.161977	0.947007	0.705048	35.7466	28.6913	Other
NCU00201	-0.473206	0.569039	0.126094	29.5362	37.2968	Other
NCU00202	0.592743	0.427677	0.0524766	49.1596	29.5774	Other
NCU00203	0.327638	0.770958	0.380646	36.1446	26.8493	Other
NCU00204	0.286298	0.816451	0.444512	33.1812	25.2317	Other
NCU00205	0.16578	0.89921	0.599224	45.3001	36.6129	Other
NCU00206	-0.0289448	1	1	30.444	27.9529	Other
NCU00207	-0.518231	0.653536	0.2061	19.7015	25.7019	Other
NCU00208	-0.705715	0.354528	0.0307525	24.2407	35.3772	Other
NCU00209	0.175421	0.892114	0.580561	41.1181	32.779	Other
NCU00210	0.0151718	1	1	29.1519	26.6102	Other
NCU00211	-0.0777261	1	0.842024	30.1577	28.6203	Other
NCU00212	0.115089	1	0.862562	31.4264	26.5348	Other
NCU00213	0.31959	0.770958	0.372528	42.3166	30.3076	Other
NCU00214	-0.175055	0.965282	0.735023	20.0203	19.6039	Other
NCU00215	0.0406628	1	1	26.5484	22.9657	Other
NCU00216	0.380151	0.717854	0.297266	36.4104	24.9917	Other
NCU00218	-0.757231	0.547871	0.110848	13.4884	20.1101	Other
NCU00219	0.466813	0.532127	0.104074	51.4601	33.6847	Other
NCU00220	0.272458	0.826214	0.465725	37.2747	27.5686	Other
NCU00221	-0.526695	0.580246	0.135979	25.0272	32.954	Other
NCU00222	0.416069	0.63005	0.184546	45.5758	30.7141	Other
NCU00223	-0.0146948	1	1	29.2087	26.2851	Other
NCU00224	-0.947566	0.170855	0.00539081	22.5875	37.5279	Other
NCU00225	0.715197	0.289488	0.0195072	50.4299	27.7524	Other
NCU00226	-0.148239	0.954087	0.71532	27.4039	26.9118	Other
NCU00227	0.19765	0.908429	0.61452	29.0114	22.6824	Other
NCU00229	-0.795637	0.50222	0.0868459	13.2605	19.7323	Other
NCU00230	0.244694	0.855913	0.520585	38.8264	29.5539	Other
NCU00231	-0.682106	0.46259	0.0673203	19.3756	27.867	Other
NCU00232	0.379508	0.694332	0.260107	39.6687	27.7329	Other
NCU00233	-0.385052	0.821192	0.45347	16.382	19.101	Other
NCU00234	0.0370226	1	1	28.8839	25.9571	Other
NCU00236	-0.432773	0.744317	0.337084	18.5819	22.5012	Other
NCU00237	-0.0729498	1	0.896011	27.4663	25.7973	Other
NCU00238	-0.0386432	1	1	25.9401	24.172	Other
NCU00239	0.466777	0.599921	0.152829	47.4849	30.9644	Other
NCU00240	-0.345303	0.770958	0.3699	21.7433	25.0814	Other
NCU00241	0.464293	0.580246	0.13655	48.0483	31.359	Other
NCU00242	0.418909	0.63005	0.184546	45.2026	30.5895	Other
NCU00243	0.22341	0.89921	0.600336	27.1568	20.6704	Other
NCU00244	-0.928163	0.344554	0.0292305	13.5835	23.151	Other
NCU00245	0.0757658	1	0.979445	29.4	24.7205	Other
NCU00246	-0.868101	0.327331	0.0260384	17.1578	28.0231	Other
NCU00247	-0.650319	0.610309	0.166408	12.0809	16.5156	Other
NCU00248	-0.741658	0.589997	0.145244	11.687	17.8199	Other
NCU00249	-0.0192881	1	1	27.1623	24.7896	Other
NCU00250	-0.61443	0.589997	0.143508	16.4022	22.433	Other
NCU00251	0.0230583	1	1	35.622	31.4226	Other
NCU00252	-0.606948	0.508509	0.0910926	23.5923	32.1905	Other
NCU00253	-0.629418	0.576784	0.132844	15.5912	21.2603	Other
NCU00254	-0.904557	0.247232	0.0133942	18.6613	31.0813	Other
NCU00257	0.139922	0.946661	0.700704	34.5892	28.3216	Other
NCU00258	0.449068	0.585006	0.139608	52.6928	34.7559	Other
NCU00259	-0.450317	0.754361	0.350388	15.9437	19.9176	Other
NCU00260	-0.42063	0.736194	0.323759	21.1114	25.4404	Other
NCU00261	0.325934	0.738024	0.327106	45.9504	33.0741	Other
NCU00262	-0.632535	0.576784	0.132844	15.5502	21.1437	Other
NCU00263	-0.0094121	1	1	29.0241	26.5468	Other
NCU00264	-0.610986	0.547871	0.114088	19.9744	26.8915	Other
NCU00265	-0.433505	0.695515	0.261837	22.2922	27.0624	Other
NCU00267	-0.539246	0.547871	0.115318	25.7491	32.6925	Other
NCU00268	0.114711	1	0.860259	31.4643	25.8106	Other
NCU00269	0.240882	0.83588	0.478602	39.0064	29.8234	Other
NCU00270	-0.170703	0.973376	0.757793	23.6246	23.6851	Other
NCU00271	-0.90703	0.478427	0.076739	12.2808	19.2017	Other
NCU00272	0.352873	0.680289	0.240191	46.6238	32.842	Other
NCU00273	0.321589	0.738024	0.327106	45.6228	32.9718	Other
NCU00274	-0.110216	0.970985	0.744911	34.3775	33.4436	Other
NCU00275	0.0118882	1	1	29.9114	26.8901	Other
NCU00276	0.155311	0.950757	0.709208	37.0816	29.5388	Other
NCU00277	0.49571	0.599987	0.155251	36.4089	23.3307	Other
NCU00278	0.078591	1	0.915024	27.6173	23.5036	Other
NCU00279	0.106694	1	0.860259	31.0588	25.8398	Other
NCU00280	0.458667	0.605672	0.159891	45.3709	29.5686	Other
NCU00281	0.242458	0.826214	0.465725	37.0042	28.2473	Other
NCU00282	-0.188887	0.932432	0.662013	27.4865	28.2791	Other
NCU00283	-0.422059	0.753839	0.348564	19.5529	23.892	Other
NCU00284	0.281426	0.83588	0.480504	32.8718	24.0032	Other
NCU00285	0.32455	0.728615	0.308594	43.4252	30.6994	Other
NCU00287	-0.235505	0.863865	0.534922	24.4101	25.8704	Other
NCU00288	-0.60256	0.687057	0.25371	12.3691	16.7862	Other
NCU00289	-0.328868	0.843462	0.488722	18.6362	21.4224	Other
NCU00290	-0.671321	0.496744	0.0829099	19.4245	28.2435	Other
NCU00291	-0.291468	0.855913	0.517896	16.8098	18.5462	Other
NCU00292	-0.357643	0.777376	0.389327	23.7331	27.5525	Other
NCU00293	-0.195331	0.936795	0.672281	19.8457	20.5224	Other
NCU00294	0.315323	0.729747	0.314924	43.4383	31.9445	Other
NCU00295	0.154179	0.971664	0.749969	32.9963	26.5495	Other
NCU00296	-0.825726	0.406554	0.0437225	16.5482	26.5432	Other
NCU00298	-0.413582	0.744317	0.337084	19.1756	22.464	Other
NCU00299	-0.714624	0.471851	0.0698319	17.9493	26.111	Other
NCU00300	-0.0980284	1	0.901301	30.7587	29.2015	Other
NCU00301	0.426312	0.63005	0.184546	45.3968	30.3725	Other
NCU00302	0.209949	0.908429	0.61452	28.8549	22.5029	Other
NCU00303	0.334744	0.770958	0.373288	36.0612	25.9496	Other
NCU00304	-0.268346	0.908335	0.61371	19.8864	21.897	Other
NCU00305	-0.578156	0.571409	0.12881	19.2969	25.9287	Other
NCU00306	-0.033232	1	0.959211	28.8217	26.7369	Other
NCU00307	-0.320807	0.908429	0.614145	14.4813	15.2869	Other
NCU00308	-0.254477	0.868013	0.542754	25.3489	27.1077	Other
NCU00309	0.271728	0.845954	0.49495	34.0447	26.002	Other
NCU00310	0.122835	0.995227	0.808558	33.9669	27.6494	Other
NCU00311	0.491874	0.597988	0.149159	38.9292	25.1221	Other
NCU00312	-0.889856	0.236703	0.01175	19.5598	31.6827	Other
NCU00313	-0.54528	0.571409	0.129551	22.2822	28.7952	Other
NCU00314	-0.0450927	1	0.963979	36.3457	34.474	Other
NCU00315	0.453327	0.541103	0.107359	55.9868	37.1498	Other
NCU00316	-0.315496	0.845954	0.499052	20.1983	22.4441	Other
NCU00317	0.0050194	1	1	29.8116	26.343	Other
NCU00318	-0.452173	0.63005	0.184832	26.3202	32.4913	Other
NCU00319	-0.622738	0.504571	0.0894538	21.0897	29.0617	Other
NCU00320	0.350792	0.680003	0.238766	51.6666	36.2382	Other
NCU00321	0.0944737	1	0.864756	33.2043	28.073	Other
NCU00322	-0.138525	0.982891	0.78308	28.3081	29.3735	Other
NCU00324	0.307386	0.770958	0.378859	43.0366	31.1824	Other
NCU00325	0.0188426	1	1	30.3095	27.1491	Other
NCU00326	-0.603753	0.607514	0.162817	15.3616	21.5241	Other
NCU00327	-0.82262	0.478427	0.076739	11.776	18.3663	Other
NCU00329	-0.132081	0.97559	0.762624	24.1894	23.8697	Other
NCU00330	0.120897	1	0.866848	34.1003	28.4194	Other
NCU00331	0.151465	0.975836	0.764322	37.6037	30.2125	Other
NCU00332	0.509329	0.541103	0.107957	44.3515	28.6599	Other
NCU00333	0.333594	0.770958	0.380646	36.9306	26.724	Other
NCU00334	0.423997	0.633909	0.187502	40.5548	27.9696	Other
NCU00335	0.63199	0.413627	0.0458556	49.5546	29.0088	Other
NCU00336	0.459888	0.617723	0.173112	43.6803	28.391	Other
NCU00337	0.287208	0.782456	0.394637	39.4689	29.0189	Other
NCU00338	-0.230717	0.882837	0.564081	27.9859	30.2246	Other
NCU00339	-0.419762	0.632907	0.186685	30.468	36.5096	Other
NCU00340	0.586587	0.441487	0.0583507	51.5975	31.0019	Other
NCU00343	-0.611895	0.665563	0.222858	13.8508	18.2156	Other
NCU00344	0.190148	0.927376	0.654405	36.2999	28.6693	Other
NCU00345	0.04161	1	1	34.5622	30.2701	Other
NCU00346	-0.146294	0.97559	0.762624	24.0174	24.1487	Other
NCU00347	0.315421	0.754361	0.35235	38.002	27.9041	Other
NCU00348	0.0231561	1	0.980145	30.4567	27.3662	Other
NCU00349	-0.291815	0.821927	0.454805	26.1715	29.347	Other
NCU00350	0.149892	0.975848	0.76754	37.9292	31.2197	Other
NCU00351	-0.305714	0.826214	0.46218	21.3317	24.1827	Other
NCU00352	0.267007	0.77905	0.390984	45.1231	33.7823	Other
NCU00353	-0.606871	0.678103	0.23772	14.5271	19.1376	Other
NCU00354	-0.662378	0.626559	0.1814	13.6205	18.0883	Other
NCU00355	0.404269	0.645738	0.199628	43.5676	30.0202	Other
NCU00356	0.128468	1	0.85528	28.8688	23.8341	Other
NCU00357	0.201947	0.911602	0.62086	39.3103	31.1105	Other
NCU00358	0.0249775	1	0.981353	35.0963	31.1701	Other
NCU00359	0.24783	0.830823	0.47228	37.8968	29.0151	Other
NCU00360	0.337411	0.762486	0.357779	33.8494	24.208	Other
NCU00361	0.436554	0.680003	0.238875	36.7128	24.5614	Other
NCU00362	-0.367473	0.711742	0.2857	28.6408	33.4898	Other
NCU00363	-0.514728	0.580246	0.135979	25.3586	32.9572	Other
NCU00364	-0.359504	0.855913	0.517896	16.3118	19.0118	Other
NCU00366	0.354574	0.711742	0.286065	44.6198	31.2652	Other
NCU00367	-0.398344	0.705465	0.277908	27.9435	32.9741	Other
NCU00368	-0.0444053	1	0.917455	43.5294	41.0822	Other
NCU00369	-0.050209	1	1	33.3062	31.2107	Other
NCU00370	-0.151003	0.946661	0.699053	23.6529	24.0129	Other
NCU00371	0.0719989	1	0.860259	31.1014	26.4056	Other
NCU00372	0.116504	0.977026	0.77063	39.168	32.4108	Other
NCU00373	0.0995049	0.99756	0.814247	35.9554	30.1406	Other
NCU00375	-0.459941	0.754361	0.350388	16.0915	19.7837	Other
NCU00376	-0.037978	1	1	30.894	28.3751	Other
NCU00377	-0.0975914	1	0.83355	26.0996	25.8135	Other
NCU00378	-0.129859	1	0.83355	26.2766	26.5871	Other
NCU00379	0.128571	0.972357	0.753802	33.9545	27.9964	Other
NCU00380	-0.59908	0.50222	0.0863913	25.1711	33.9765	Other
NCU00382	0.4225	0.636812	0.190127	46.9885	31.3245	Other
NCU00384	-0.660204	0.626559	0.1814	13.3314	17.9783	Other
NCU00385	0.458948	0.665563	0.220249	38.6516	25.4491	Other
NCU00386	-0.229763	0.901955	0.605243	26.3325	28.4192	Other
NCU00387	0.0233951	1	1	29.0781	26.3316	Other
NCU00388	0.422833	0.607514	0.162836	50.0371	33.3173	Other
NCU00389	0.0642567	1	0.92966	39.6981	34.0619	Other
NCU00391	-0.761732	0.547871	0.114254	11.8684	17.4597	Other
NCU00392	-0.00536024	1	1	28.1169	25.3187	Other
NCU00395	0.101239	1	0.860259	31.2175	26.0934	Other
NCU00396	0.271498	0.81206	0.43718	46.399	34.7612	Other
NCU00397	-0.389167	0.764937	0.363522	17.1867	20.4952	Other
NCU00398	0.174609	0.920122	0.638884	32.9652	26.2919	Other
NCU00399	-0.0929755	1	0.954061	22.9009	21.8223	Other
NCU00400	-0.412189	0.720973	0.301983	19.3296	23.0398	Other
NCU00401	0.0349085	1	1	32.6285	28.8592	Other
NCU00403	-0.342965	0.770958	0.370689	25.7641	29.9795	Other
NCU00404	-0.0921883	0.987755	0.7899	31.1714	30.3646	Other
NCU00405	0.171586	0.946661	0.700704	33.8989	27.7307	Other
NCU00406	0.396081	0.662965	0.217014	47.0335	32.153	Other
NCU00407	-0.127065	0.967696	0.741242	32.6518	32.4953	Other
NCU00408	-0.447467	0.67084	0.228083	25.02	30.9873	Other
NCU00409	-0.15637	0.936795	0.672798	30.2961	29.8313	Other
NCU00410	0.297217	0.750626	0.344273	49.4554	36.0209	Other
NCU00411	-0.000863669	1	1	25.5503	23.0374	Other
NCU00412	0.497719	0.509386	0.0925585	51.4965	33.3042	Other
NCU00413	0.552314	0.433822	0.0533694	59.5281	36.5282	Other
NCU00414	0.219681	0.855913	0.520585	38.4242	30.0425	Other
NCU00415	0.429973	0.580246	0.135196	51.9031	34.4377	Other
NCU00416	0.113509	0.982755	0.781861	42.4519	36.2421	Other
NCU00417	0.229086	0.859223	0.526411	38.6825	30.6412	Other
NCU00418	-0.300933	0.770547	0.368247	29.9938	34.2799	Other
NCU00419	-0.12394	0.96659	0.73741	31.732	31.7541	Other
NCU00420	0.361979	0.725367	0.304833	37.1585	25.9587	Other
NCU00421	0.64427	0.383938	0.0370127	52.2649	30.0373	Other
NCU00422	0.171088	0.911602	0.62086	39.6449	31.6994	Other
NCU00423	0.130842	0.97559	0.760966	35.2599	29.6872	Other
NCU00424	0.40795	0.580246	0.135156	59.6427	40.7391	Other
NCU00425	-0.101506	0.973728	0.758166	38.194	36.9416	Other
NCU00426	-0.178941	0.934243	0.667536	28.3263	29.1688	Other
NCU00427	0.551403	0.462482	0.064303	53.2983	32.8236	Other
NCU00428	0.183	0.895271	0.59021	43.1648	34.4859	Other
NCU00430	0.335954	0.711742	0.287966	49.8182	35.6411	Other
NCU00431	0.248712	0.851477	0.508263	36.6729	27.6607	Other
NCU00432	0.0451519	1	1	31.0257	27.5964	Other
NCU00434	0.00190585	1	1	29.7013	27.4208	Other
NCU00435	-0.272429	0.83588	0.480566	23.2433	26.0725	Other
NCU00436	0.273981	0.77905	0.390984	44.7215	33.6095	Other
NCU00437	-0.21897	0.89921	0.598567	25.3789	27.0219	Other
NCU00438	-0.472461	0.687057	0.251985	21.6087	26.5884	Other
NCU00439	-0.888336	0.462482	0.0668439	12.5218	20.0487	Other
NCU00440	0.349093	0.699201	0.271094	46.0704	33.1763	Other
NCU00441	0.0321219	1	1	31.8663	27.7866	Other
NCU00442	0.168554	0.932432	0.663707	37.3657	30.8372	Other
NCU00443	0.246948	0.855913	0.520585	37.6185	29.2286	Other
NCU00444	-0.149933	0.977026	0.771479	26.3461	26.4815	Other
NCU00445	0.130415	0.996445	0.811467	34.3807	28.6736	Other
NCU00446	-0.299825	0.873566	0.549908	19.4361	21.7047	Other
NCU00447	0.588313	0.413627	0.0462089	56.4858	33.6159	Other
NCU00448	-0.0153015	1	1	35.2239	32.4663	Other
NCU00449	-0.709778	0.478427	0.0763629	18.4877	27.3171	Other
NCU00450	0.123446	0.99756	0.814247	35.0157	29.7046	Other
NCU00451	-0.31124	0.845954	0.499052	19.7656	22.7294	Other
NCU00453	0.154953	0.957858	0.720707	39.72	32.3878	Other
NCU00454	0.0876909	1	0.866848	33.5539	28.8707	Other
NCU00455	0.19185	0.89921	0.600217	34.7258	27.9837	Other
NCU00456	-0.606675	0.599921	0.151153	15.116	20.2298	Other
NCU00457	0.446824	0.639917	0.193619	42.8697	28.3364	Other
NCU00458	-0.612101	0.665563	0.222858	13.0338	17.9558	Other
NCU00459	0.3545	0.662965	0.216709	51.2861	36.2219	Other
NCU00461	-0.206028	0.863865	0.532727	30.6303	32.2511	Other
NCU00462	-0.811493	0.521487	0.0995742	12.4378	18.7699	Other
NCU00463	-0.228612	0.855534	0.512353	27.4272	29.5373	Other
NCU00464	0.714126	0.115887	0.0020843	87.1882	48.3111	Other
NCU00465	0.22208	0.840076	0.484705	39.6599	30.9855	Other
NCU00466	-0.206725	0.884985	0.570556	29.3604	30.6511	Other
NCU00467	0.150189	0.975836	0.764322	36.351	30.2717	Other
NCU00468	0.168962	0.941607	0.681189	30.0863	24.361	Other
NCU00469	-0.0500066	1	0.961212	32.2546	29.9321	Other
NCU00470	-0.309794	0.770958	0.378992	27.6579	30.422	Other
NCU00471	-0.452088	0.687057	0.251985	21.4697	26.4779	Other
NCU00472	-0.0014071	1	1	38.2347	34.3084	Other
NCU00473	-0.382753	0.762717	0.359488	20.6162	24.2036	Other
NCU00475	0.683821	0.229249	0.0108381	64.3941	36.6059	Other
NCU00476	0.145177	0.988461	0.791683	28.1569	23.2272	Other
NCU00477	0.430884	0.599921	0.152829	46.9706	31.7437	Other
NCU00478	0.138089	0.950757	0.709208	36.4727	30.1117	Other
NCU00480	0.174517	0.875239	0.552672	44.8319	35.7276	Other
NCU00481	-0.125195	1	0.842024	29.1633	29.3068	Other
NCU00483	0.0417122	1	0.980145	31.3566	27.0693	Other
NCU00484	-0.374512	0.744317	0.337084	19.2021	22.0919	Other
NCU00485	-0.47699	0.754361	0.350388	16.3347	20.0446	Other
NCU00486	-0.251337	0.855913	0.517978	22.0841	24.0642	Other
NCU00487	-0.505582	0.694332	0.259159	18.5307	23.7695	Other
NCU00488	0.239266	0.821192	0.451244	40.9739	31.826	Other
NCU00489	0.629571	0.344554	0.0294043	56.5265	32.987	Other
NCU00490	0.0890237	1	0.866848	33.433	28.8542	Other
NCU00491	-0.99831	0.38414	0.037348	11.494	20.1001	Other
NCU00492	0.381617	0.665563	0.222601	47.3909	33.0884	Other
NCU00493	0.379866	0.680289	0.240191	46.0376	32.3098	Other
NCU00494	-0.261767	0.824217	0.459122	32.9644	35.9708	Other
NCU00495	0.267435	0.830823	0.47228	37.9857	28.5237	Other
NCU00496	-0.639667	0.504571	0.0894538	20.6434	29.1029	Other
NCU00497	-0.430954	0.699201	0.271345	22.9694	28.0884	Other
NCU00498	-0.227304	0.901955	0.605243	26.318	28.4356	Other
NCU00499	0.480285	0.607514	0.161316	41.2732	26.5566	Other
NCU00500	-0.77284	0.569039	0.12685	12.8068	19.0979	Other
NCU00501	0.218821	0.855913	0.520585	39.5587	30.1105	Other
NCU00502	0.396977	0.68515	0.246809	42.8606	29.3172	Other
NCU00503	0.280889	0.824162	0.458922	37.0925	26.9283	Other
NCU00504	-0.193675	0.910023	0.617656	28.0992	29.6831	Other
NCU00505	0.358283	0.716118	0.295426	40.4418	28.5434	Other
NCU00506	0.000736951	1	1	29.252	27.5366	Other
NCU00509	-0.564282	0.589997	0.145589	21.2292	28.1055	Other
NCU00510	-0.679472	0.653792	0.207224	12.4989	17.1731	Other
NCU00512	-0.319806	0.830823	0.47161	22.4284	25.5416	Other
NCU00513	-0.0710643	1	0.887422	23.1204	21.9198	Other
NCU00515	0.00406028	1	1	31.4346	29.1294	Other
NCU00516	-0.837221	0.550308	0.116765	10.6169	16.1532	Other
NCU00517	0.0307589	1	1	34.1222	30.3717	Other
NCU00518	-0.19586	0.922986	0.643631	23.9233	25.2772	Other
NCU00519	-0.115477	1	0.876281	19.0581	18.9013	Other
NCU00520	0.423125	0.612681	0.167747	49.0194	33.881	Other
NCU00521	0.232707	0.91426	0.627297	30.9495	23.7171	Other
NCU00522	0.200056	0.918912	0.633228	31.8326	25.2511	Other
NCU00523	0.0553215	1	0.980145	31.0291	26.875	Other
NCU00524	-0.711754	0.413627	0.0461444	20.5419	30.6666	Other
NCU00526	-0.521472	0.580246	0.137122	22.6629	29.6077	Other
NCU00527	-0.00173671	1	1	34.1452	31.4941	Other
NCU00528	0.231706	0.867749	0.540537	34.2631	26.2541	Other
NCU00529	-0.32481	0.698567	0.26356	38.4606	43.7877	Other
NCU00530	-0.31772	0.698567	0.26356	38.986	43.8799	Other
NCU00531	-0.479467	0.566984	0.123828	31.8673	40.1584	Other
NCU00534	-0.934295	0.260737	0.014973	16.3137	27.9718	Other
NCU00535	-0.398703	0.812931	0.440018	14.9469	17.866	Other
NCU00536	0.411777	0.729747	0.314143	33.0267	22.6786	Other
NCU00537	-0.0199693	1	1	26.9476	25.2372	Other
NCU00538	0.31074	0.754361	0.352028	44.1901	32.229	Other
NCU00541	0.593339	0.477317	0.0719889	42.662	25.6982	Other
NCU00542	-0.388344	0.775998	0.38763	19.0367	22.6201	Other
NCU00545	0.387169	0.705465	0.281533	38.4573	26.641	Other
NCU00547	-0.884215	0.327331	0.0260384	17.2868	28.7381	Other
NCU00548	-0.295471	0.873566	0.549908	19.0185	21.6754	Other
NCU00549	-0.434317	0.764937	0.363522	16.7647	20.7659	Other
NCU00550	0.306588	0.770958	0.380646	37.2358	27.2424	Other
NCU00551	0.326056	0.711742	0.287966	50.1789	36.1007	Other
NCU00552	-0.203887	0.924758	0.650087	25.7076	26.4172	Other
NCU00553	0.0600721	1	0.981353	35.4056	30.5557	Other
NCU00554	0.203338	0.91426	0.627297	31.0653	24.3488	Other
NCU00556	0.505301	0.547871	0.112579	46.3592	29.5512	Other
NCU00557	-0.574981	0.711742	0.288857	12.0249	15.7013	Other
NCU00558	-0.471097	0.615792	0.169612	24.9597	30.5647	Other
NCU00559	-0.364978	0.743547	0.333947	22.0819	25.9584	Other
NCU00560	-0.326742	0.812931	0.441723	19.6386	22.1529	Other
NCU00561	-0.69302	0.626559	0.1814	12.3876	17.9088	Other
NCU00562	0.177681	0.941607	0.681189	30.8227	24.1344	Other
NCU00563	0.0217606	1	1	33.3113	29.9705	Other
NCU00564	0.369961	0.739226	0.330183	35.344	24.7661	Other
NCU00565	0.119301	1	0.85528	29.0165	24.0173	Other
NCU00566	-0.0314296	1	1	25.8097	24.073	Other
NCU00567	0.376099	0.676682	0.233829	40.1303	28.1171	Other
NCU00568	-0.0127615	1	1	29.6117	27.2405	Other
NCU00569	-0.339051	0.855913	0.517896	16.7295	18.7829	Other
NCU00570	-0.284591	0.83588	0.477731	18.5823	20.1292	Other
NCU00571	-0.463943	0.699201	0.270309	19.3723	24.6741	Other
NCU00572	-0.587734	0.699201	0.269631	13.8918	18.2988	Other
NCU00573	0.143455	0.973376	0.757463	34.3702	28.6006	Other
NCU00574	-0.545983	0.738024	0.328887	11.6592	15.1433	Other
NCU00575	0.0121741	1	1	27.8749	25.0712	Other
NCU00576	0.109221	1	0.823679	19.5947	16.1851	Other
NCU00577	-0.0468367	1	1	30.8212	29.2781	Other
NCU00578	-0.535401	0.725367	0.305773	12.5883	16.8766	Other
NCU00579	0.38015	0.676682	0.234329	45.1798	31.499	Other
NCU00580	0.172481	0.967696	0.741734	30.5704	24.6882	Other
NCU00581	0.314967	0.81206	0.436869	32.3726	23.7722	Other
NCU00582	-0.457006	0.665563	0.219681	24.0818	30.4153	Other
NCU00583	-1.0011	0.441487	0.0567008	9.83329	17.2204	Other
NCU00584	-0.243321	0.901955	0.604976	19.6938	20.4954	Other
NCU00585	0.0313719	1	1	32.9224	29.7636	Other
NCU00586	-0.411299	0.770958	0.37852	14.4348	17.6268	Other
NCU00587	0.312876	0.795298	0.411299	35.1418	25.814	Other
NCU00589	0.356749	0.738024	0.326224	40.0592	28.4267	Other
NCU00590	0.0669299	1	0.918102	28.6988	25.2477	Other
NCU00591	-0.097069	1	0.83355	27.2228	25.9865	Other
NCU00592	0.676133	0.374937	0.0354975	45.648	25.9953	Other
NCU00593	0.0536461	1	0.981622	35.5684	31.2932	Other
NCU00594	-0.968732	0.404251	0.0428837	10.7223	18.6063	Other
NCU00595	-0.366027	0.762717	0.359488	20.3514	23.9739	Other
NCU00596	-0.604456	0.654048	0.20956	14.4194	19.5974	Other
NCU00597	0.0407085	1	1	30.3567	25.9278	Other
NCU00598	-0.13114	1	0.879373	19.8162	19.9335	Other
NCU00599	-0.00810845	1	1	28.5002	26.4617	Other
NCU00600	0.202519	0.89242	0.58232	32.3772	25.5176	Other
NCU00602	0.136791	0.991137	0.798953	30.7752	25.1718	Other
NCU00603	-0.892262	0.236703	0.01175	19.03	31.5767	Other
NCU00604	-0.0119587	1	1	32.7179	30.4824	Other
NCU00605	0.0605055	1	0.981072	34.0425	29.3515	Other
NCU00606	-0.0728275	1	0.957691	26.0036	25.2962	Other
NCU00607	-0.502362	0.605672	0.15912	25.8958	33.082	Other
NCU00608	-0.0629509	1	0.959912	30.1278	28.2844	Other
NCU00609	0.0479394	1	0.918102	28.9059	25.4587	Other
NCU00611	-0.105468	0.987755	0.7899	31.2645	30.5354	Other
NCU00614	-0.0263756	1	1	33.2188	30.6176	Other
NCU00616	-0.397067	0.807509	0.430594	18.5353	21.8984	Other
NCU00617	-0.0107719	1	1	27.4277	25.2472	Other
NCU00618	0.486955	0.541103	0.108038	52.1852	33.7208	Other
NCU00619	0.206188	0.918912	0.633228	32.6977	25.1277	Other
NCU00620	0.464794	0.611817	0.167259	42.5739	27.5286	Other
NCU00621	0.336126	0.729747	0.314924	43.0837	31.1281	Other
NCU00622	0.47584	0.518677	0.0962764	52.7771	34.4689	Other
NCU00623	0.0582747	1	0.980777	32.7059	28.5559	Other
NCU00624	0.0280389	1	1	30.7598	26.7879	Other
NCU00627	0.324611	0.788267	0.403774	34.2438	25.0552	Other
NCU00628	0.281579	0.803937	0.425549	36.5057	27.8897	Other
NCU00629	0.52796	0.495462	0.0821454	51.1649	32.8809	Other
NCU00630	0.0127007	1	1	23.7337	21.0233	Other
NCU00631	-0.0395701	1	1	32.0037	29.9857	Other
NCU00632	0.400119	0.653536	0.205529	44.3345	30.7731	Other
NCU00633	-0.00159585	1	1	26.8933	25.4512	Other
NCU00634	0.630791	0.295624	0.0206906	58.707	34.4643	Other
NCU00635	0.469696	0.597891	0.148827	41.7533	27.792	Other
NCU00636	0.165942	0.934243	0.668085	39.3847	31.5684	Other
NCU00638	-0.611285	0.541103	0.106218	19.2549	25.8647	Other
NCU00640	0.0243824	1	1	35.3067	31.3375	Other
NCU00641	0.121172	1	0.849729	26.95	22.4392	Other
NCU00642	-0.590824	0.493542	0.0809551	23.7606	32.4108	Other
NCU00643	-0.274463	0.908335	0.61371	19.8738	21.8049	Other
NCU00644	0.323525	0.770958	0.380646	37.1346	26.5606	Other
NCU00646	-0.840808	0.386506	0.0387292	16.0184	25.3666	Other
NCU00648	-0.130513	0.964456	0.733403	31.9396	30.7123	Other
NCU00649	0.035289	1	0.979445	28.8719	25.4993	Other
NCU00650	0.422837	0.651354	0.203172	41.1189	27.1082	Other
NCU00651	0.547761	0.477317	0.0717377	49.3159	30.4755	Other
NCU00652	-0.0431514	1	0.963979	36.8973	34.783	Other
NCU00653	-0.0408891	1	1	25.2647	23.445	Other
NCU00654	-0.246779	0.855913	0.517978	22.2208	24.0508	Other
NCU00655	0.361582	0.687057	0.253084	43.718	30.6638	Other
NCU00656	0.0634894	1	0.923371	33.3307	28.8782	Other
NCU00657	0.245403	0.89422	0.588549	33.4977	25.6077	Other
NCU00658	-0.110803	0.972357	0.751804	36.2518	35.1576	Other
NCU00659	-0.24066	0.911705	0.62189	21.4396	22.8298	Other
NCU00660	0.313856	0.786424	0.401295	40.3952	29.2541	Other
NCU00662	-0.450225	0.65808	0.213181	26.8129	32.972	Other
NCU00663	-0.113625	1	0.823547	23.0588	22.9908	Other
NCU00664	0.362677	0.701237	0.274297	37.5981	26.3337	Other
NCU00665	0.163521	0.942419	0.686423	31.4625	25.2105	Other
NCU00666	-0.125779	1	0.81979	22.7145	22.1401	Other
NCU00667	0.177714	0.886984	0.575476	39.7142	31.9203	Other
NCU00668	0.393389	0.653536	0.206337	49.3698	33.8576	Other
NCU00669	0.692119	0.329738	0.0263316	47.4444	26.0685	Other
NCU00670	0.121646	1	0.852583	27.5951	22.9932	Other
NCU00671	0.183894	0.896287	0.594792	43.8821	35.0807	Other
NCU00673	0.398736	0.676682	0.234329	45.2899	31.0943	Other
NCU00674	-0.432954	0.65808	0.213181	26.5054	32.5444	Other
NCU00675	0.376052	0.699201	0.266837	41.3753	28.6671	Other
NCU00676	0.420732	0.715015	0.293353	27.0286	17.9632	Other
NCU00677	-0.300274	0.843462	0.489087	24.7611	27.4025	Other
NCU00678	-0.534567	0.653536	0.2061	19.7398	25.551	Other
NCU00679	0.0200057	1	1	26.985	24.1732	Other
NCU00680	0.300882	0.807051	0.428907	32.4485	23.5359	Other
NCU00681	0.346812	0.699201	0.265222	45.7044	32.5962	Other
NCU00682	0.17481	0.924758	0.649456	33.4647	27.9496	Other
NCU00684	-0.115673	0.982891	0.78308	29.3057	28.8663	Other
NCU00685	0.589624	0.363016	0.0329887	58.6645	35.1968	Other
NCU00687	0.324881	0.750626	0.345196	37.9525	27.1443	Other
NCU00688	-0.456209	0.712123	0.29129	21.9021	26.6332	Other
NCU00689	0.16698	0.944983	0.691408	32.2019	26.2758	Other
NCU00690	0.263214	0.855913	0.51454	37.3462	28.3828	Other
NCU00691	-0.106042	1	0.891972	24.884	24.5938	Other
NCU00692	0.531953	0.599987	0.155251	36.7229	22.7045	Other
NCU00693	0.172141	0.946661	0.700704	34.3792	27.8699	Other
NCU00694	-0.0115215	1	1	29.5236	26.3515	Other
NCU00695	0.017966	1	1	25.9459	23.0268	Other
NCU00696	0.185455	0.96422	0.732629	28.733	22.8991	Other
NCU00697	-0.659179	0.50222	0.0866253	18.2386	26.176	Other
NCU00698	-0.518576	0.662244	0.216097	21.2211	26.5662	Other
NCU00699	-0.253881	0.830823	0.470325	28.6695	30.7577	Other
NCU00700	-0.182351	0.934243	0.667536	28.7333	29.1254	Other
NCU00701	-0.481479	0.699201	0.270309	20.0319	24.8241	Other
NCU00704	-0.832745	0.327331	0.0260384	16.7953	27.9014	Other
NCU00705	-0.779545	0.404251	0.0429047	18.0589	28.5114	Other
NCU00706	0.716777	0.186556	0.00648057	65.4756	36.0922	Other
NCU00707	0.258078	0.845954	0.49495	34.8448	26.1903	Other
NCU00708	-0.131693	0.960289	0.724806	28.4505	28.5658	Other
NCU00709	-0.587204	0.541103	0.108166	21.3924	29.004	Other
NCU00710	-0.182002	0.971535	0.747174	21.4214	21.6729	Other
NCU00711	0.197977	0.924826	0.65042	25.9082	19.8629	Other
NCU00712	0.744135	0.258608	0.0144794	54.2278	29.037	Other
NCU00713	-0.0921265	1	0.954061	22.415	21.6409	Other
NCU00714	0.567141	0.421426	0.0512382	51.2562	31.6144	Other
NCU00715	-0.0429916	1	0.962393	34.1748	31.7211	Other
NCU00716	-0.620894	0.547871	0.114088	20.0304	27.1316	Other
NCU00717	0.296065	0.788267	0.403774	34.5395	25.4515	Other
NCU00718	-0.710125	0.477317	0.0721617	15.7155	24.1586	Other
NCU00719	-0.282601	0.851477	0.508786	21.9428	23.3965	Other
NCU00720	0.105991	1	0.857835	30.0205	24.8684	Other
NCU00721	0.210485	0.911602	0.62107	29.7391	23.2651	Other
NCU00722	0.16731	0.942419	0.686423	31.4694	25.1051	Other
NCU00723	-0.141762	0.964456	0.733403	30.2815	30.7999	Other
NCU00724	-0.59597	0.547871	0.115237	22.5341	30.4341	Other
NCU00725	0.436292	0.662244	0.216015	42.1198	28.209	Other
NCU00726	-0.0324739	1	1	22.526	20.907	Other
NCU00727	0.144099	0.992185	0.802314	32.2267	25.7963	Other
NCU00728	-0.0675683	1	0.957691	26.7925	25.5038	Other
NCU00729	-0.581628	0.665563	0.222858	13.5118	17.8599	Other
NCU00730	-0.636263	0.521487	0.0982721	18.0715	24.9403	Other
NCU00732	-0.406818	0.682532	0.244252	24.2775	28.6821	Other
NCU00733	-0.920657	0.260737	0.015274	17.7795	29.904	Other
NCU00734	-0.041394	1	1	27.0603	25.3175	Other
NCU00735	-0.196476	0.990756	0.796576	17.465	18.0146	Other
NCU00736	-0.477574	0.685409	0.247536	17.5199	22.3454	Other
NCU00737	-0.0571417	1	1	22.7309	21.5886	Other
NCU00738	0.0501201	1	0.980145	30.7905	26.8499	Other
NCU00739	-0.702991	0.462482	0.0647057	20.011	30.5584	Other
NCU00740	-0.276072	0.843462	0.489087	25.2891	27.3851	Other
NCU00741	0.0514588	1	1	27.0754	23.749	Other
NCU00742	0.0713083	1	0.913349	25.6483	22.3859	Other
NCU00743	0.365051	0.653536	0.206337	49.1527	34.58	Other
NCU00744	0.424251	0.687057	0.251334	34.634	23.1183	Other
NCU00745	-0.98649	0.142397	0.00342772	21.0524	36.3466	Other
NCU00747	-0.754627	0.361045	0.0316518	21.8348	34.2355	Other
NCU00748	-0.189362	0.936795	0.672281	19.4388	20.4704	Other
NCU00749	0.455322	0.599921	0.154396	42.9381	28.6688	Other
NCU00751	-0.933838	0.386506	0.0383561	12.4858	21.508	Other
NCU00752	0.0931742	1	0.864756	32.6295	27.8673	Other
NCU00753	0.377009	0.764162	0.361428	29.5692	20.4469	Other
NCU00754	-0.27147	0.826214	0.462731	26.8503	29.6573	Other
NCU00755	-0.446217	0.729552	0.313115	19.9646	24.7067	Other
NCU00756	-0.848025	0.478427	0.076739	11.5793	18.9774	Other
NCU00757	-0.286401	0.775998	0.386985	27.7448	31.5648	Other
NCU00758	-0.435988	0.705465	0.280525	23.696	29.4259	Other
NCU00759	0.23478	0.89242	0.58232	32.2814	24.7317	Other
NCU00760	-0.512256	0.738024	0.328887	11.9156	14.6742	Other
NCU00761	-0.780627	0.50222	0.0847815	14.3699	21.9076	Other
NCU00762	-0.56389	0.599921	0.154574	19.7208	26.3503	Other
NCU00763	-0.531166	0.607514	0.161762	23.4512	30.2693	Other
NCU00764	-0.837632	0.289488	0.0199893	20.2472	31.7942	Other
NCU00765	-0.492907	0.607514	0.161762	23.4053	29.7935	Other
NCU00766	-0.188967	0.990756	0.796576	16.9333	17.8402	Other
NCU00768	0.116089	1	0.862562	31.7771	26.5661	Other
NCU00770	0.229421	0.845954	0.496301	42.0935	32.3616	Other
NCU00771	0.327877	0.798785	0.418552	37.0669	26.4348	Other
NCU00772	0.381507	0.699201	0.266837	40.8509	28.5198	Other
NCU00773	-0.44615	0.705465	0.281011	20.2819	25.3268	Other
NCU00774	-0.0454648	1	1	25.7159	24.4271	Other
NCU00775	0.460365	0.65808	0.213224	37.7079	24.6528	Other
NCU00776	0.282789	0.770958	0.378859	42.9756	31.6111	Other
NCU00777	0.295591	0.775998	0.387758	38.5403	28.0359	Other
NCU00778	0.244799	0.840076	0.484705	40.0462	30.6299	Other
NCU00779	0.290829	0.750626	0.344273	49.2422	36.2738	Other
NCU00780	-0.702944	0.584382	0.139159	13.8937	19.9848	Other
NCU00781	-0.645474	0.419187	0.0503849	25.4531	36.3617	Other
NCU00782	-0.299775	0.798708	0.415443	27.6169	30.0949	Other
NCU00783	-0.0427108	1	1	12.389	11.4075	Other
NCU00784	-0.0607302	1	0.959912	29.8021	28.4203	Other
NCU00786	-0.586195	0.541103	0.108166	21.4109	28.8512	Other
NCU00787	-0.827131	0.50222	0.0868459	12.3961	19.7275	Other
NCU00788	-0.564633	0.599921	0.153926	16.8191	23.0773	Other
NCU00789	0.34235	0.735486	0.319302	39.0243	27.8739	Other
NCU00790	0.0740968	1	0.870756	36.1891	31.0913	Other
NCU00792	0.347229	0.725367	0.304833	36.526	26.14	Other
NCU00793	0.620749	0.402291	0.0415522	54.2979	31.7925	Other
NCU00794	0.206541	0.961667	0.7277	28.1321	21.9447	Other
NCU00795	-0.141277	0.960289	0.724806	28.5671	28.9083	Other
NCU00796	0.288633	0.786424	0.401295	39.36	29.7644	Other
NCU00797	-0.283491	0.843462	0.489087	24.7665	27.2339	Other
NCU00798	-0.00593978	1	1	35.5395	31.5185	Other
NCU00799	-0.133846	0.960289	0.724806	29.3067	28.6482	Other
NCU00800	-0.747299	0.435113	0.0540575	18.5076	28.2969	Other
NCU00801	-0.222968	0.892951	0.584135	24.2282	25.1116	Other
NCU00802	-0.17862	0.936795	0.672798	29.1479	29.9216	Other
NCU00803	-0.610978	0.504571	0.0894538	21.0116	28.7108	Other
NCU00804	-0.851967	0.50222	0.0868459	12.7323	19.9679	Other
NCU00805	0.377318	0.711742	0.288574	40.5109	27.7089	Other
NCU00808	-0.247215	0.863865	0.532727	30.5951	33.0582	Other
NCU00809	-0.0392433	1	0.960578	30.4795	28.5235	Other
NCU00810	-0.0940141	1	0.849324	32.4532	31.6312	Other
NCU00811	0.150753	1	0.849729	27.2751	21.9569	Other
NCU00812	0.131716	0.990688	0.795415	29.6176	24.3336	Other
NCU00813	-0.0888794	1	0.897868	27.8775	27.0826	Other
NCU00814	0.0894256	1	0.868846	34.9105	29.768	Other
NCU00817	-0.26081	0.812931	0.441661	36.8422	39.5111	Other
NCU00818	-0.17693	0.954087	0.71532	26.5637	27.2787	Other
NCU00819	-0.578929	0.699201	0.269631	13.6818	18.0459	Other
NCU00821	-0.214202	0.901955	0.605243	26.9311	28.199	Other
NCU00822	-0.773045	0.383618	0.0368636	20.6493	31.3869	Other
NCU00823	0.370912	0.720973	0.302097	41.7388	29.2491	Other
NCU00824	0.490904	0.580246	0.137477	40.0851	25.9697	Other
NCU00825	-0.267704	0.821927	0.454805	26.3555	28.9278	Other
NCU00826	-0.825058	0.278853	0.017563	20.7722	32.7903	Other
NCU00827	0.441567	0.636812	0.189799	38.3148	25.135	Other
NCU00828	-0.0463597	1	1	17.5777	16.064	Other
NCU00829	0.236511	0.855913	0.51454	37.8642	28.7696	Other
NCU00830	-0.143132	0.950899	0.710194	25.9266	25.8035	Other
NCU00831	0.156074	0.961667	0.7277	28.0401	22.5231	Other
NCU00832	-0.0616919	1	0.884921	22.2799	21.1492	Other
NCU00833	0.18318	0.892114	0.580561	41.1043	32.8886	Other
NCU00835	-0.342786	0.812931	0.441723	19.5129	22.3915	Other
NCU00836	-0.409668	0.753839	0.348564	19.6888	23.5321	Other
NCU00837	-0.416377	0.753839	0.348564	19.7997	23.6271	Other
NCU00838	-0.218011	0.946661	0.699053	23.2628	24.7537	Other
NCU00839	0.0985534	0.996445	0.811467	34.12	29.1488	Other
NCU00842	-0.653668	0.462482	0.066972	24.2756	33.1926	Other
NCU00843	0.160061	0.990688	0.795415	29.3582	23.7374	Other
NCU00844	-0.474593	0.605672	0.15912	26.0373	32.6472	Other
NCU00845	-0.212891	0.927494	0.656205	26.2963	27.4076	Other
NCU00846	-0.407957	0.775998	0.38763	18.8787	22.683	Other
NCU00847	0.162707	0.96422	0.732629	28.7924	23.4199	Other
NCU00848	-0.332025	0.826214	0.466008	17.6259	19.627	Other
NCU00849	-0.995486	0.304927	0.0216551	13.8143	23.5631	Other
NCU00850	0.217317	0.922986	0.644288	33.4742	26.6143	Other
NCU00853	0.114587	0.964996	0.734111	44.4013	36.6661	Other
NCU00854	-0.233874	0.87936	0.559248	20.8804	22.1523	Other
NCU00855	-0.504246	0.662244	0.216097	21.1554	26.7039	Other
NCU00856	-0.252615	0.886984	0.576311	23.111	24.6447	Other
NCU00857	0.300063	0.803937	0.425549	37.405	27.5992	Other
NCU00859	-0.434737	0.729552	0.313115	20.6001	24.6851	Other
NCU00860	-0.0841561	1	0.896011	27.8036	26.3941	Other
NCU00862	-0.0899621	1	0.956865	25.6744	24.6442	Other
NCU00863	-0.0982934	1	0.83355	26.8909	25.9873	Other
NCU00864	0.0241775	1	1	22.9636	20.2217	Other
NCU00865	0.366981	0.725367	0.304833	37.2183	25.8932	Other
NCU00866	0.320272	0.735794	0.321092	43.542	32.4815	Other
NCU00867	0.151155	0.947007	0.705048	34.6572	28.9409	Other
NCU00868	-0.31487	0.830823	0.47161	21.9743	25.5906	Other
NCU00869	0.0029679	1	1	33.8498	31.3083	Other
NCU00870	0.0562914	1	0.981353	34.8878	30.4045	Other
NCU00871	-0.56703	0.617723	0.173995	18.533	25.6322	Other
NCU00872	-0.594263	0.50222	0.0863913	25.174	34.1848	Other
NCU00873	-0.914051	0.260737	0.015274	17.5519	30.4569	Other
NCU00874	-0.189862	0.887241	0.576753	30.4653	31.6113	Other
NCU00875	-0.258474	0.83588	0.477609	28.9535	31.6821	Other
NCU00876	0.298561	0.855913	0.519513	30.4279	22.7684	Other
NCU00877	-0.325437	0.83588	0.477731	18.3472	20.5841	Other
NCU00878	-0.54385	0.676682	0.235413	16.8662	21.806	Other
NCU00879	0.0974045	0.996445	0.811467	34.5132	29.0886	Other
NCU00880	0.450063	0.599921	0.152829	45.9875	31.2484	Other
NCU00881	0.26735	0.821192	0.451857	34.6277	26.2056	Other
NCU00882	-0.608666	0.607764	0.16409	18.2829	24.7571	Other
NCU00883	0.0695462	1	0.923371	34.9359	28.9797	Other
NCU00884	0.306161	0.762717	0.359283	40.4401	28.9967	Other
NCU00885	-0.685958	0.389646	0.0394051	23.4539	33.4088	Other
NCU00886	-0.333406	0.812931	0.441723	19.5843	22.5575	Other
NCU00887	-0.425449	0.705465	0.281011	21.0554	25.4125	Other
NCU00889	0.328739	0.770958	0.373288	36.2786	25.8925	Other
NCU00890	-0.032052	1	1	29.6636	27.4838	Other
NCU00891	0.207572	0.89422	0.588549	33.5042	26.3394	Other
NCU00892	0.076426	1	0.92215	32.2261	27.7415	Other
NCU00893	-0.114664	1	0.83355	26.9531	26.3413	Other
NCU00894	0.518428	0.580246	0.137477	40.4776	25.6146	Other
NCU00895	0.289114	0.824162	0.458922	35.2316	26.8438	Other
NCU00896	0.302499	0.782456	0.394637	39.1072	28.7642	Other
NCU00897	0.167713	0.911602	0.62086	39.3282	31.885	Other
NCU00898	-0.36361	0.78487	0.398727	20.0805	23.4163	Other
NCU00899	0.281649	0.795298	0.411299	35.0677	26.3807	Other
NCU00900	0.391368	0.705465	0.281533	38.7975	26.715	Other
NCU00901	0.107188	0.964996	0.734111	43.9614	36.6732	Other
NCU00902	-0.241941	0.892951	0.584135	22.8873	25.4564	Other
NCU00903	0.297028	0.799468	0.420604	30.8683	22.5954	Other
NCU00904	0.161894	0.946571	0.696163	33.1111	27.1439	Other
NCU00905	0.380295	0.739226	0.330183	34.6914	24.6209	Other
NCU00906	0.119189	0.988461	0.791683	27.9146	23.4	Other
NCU00907	-0.356936	0.812931	0.440018	15.7499	17.5587	Other
NCU00911	-0.163565	0.960289	0.724806	28.6864	29.0515	Other
NCU00912	-0.224348	0.882837	0.564081	28.3542	29.7946	Other
NCU00913	0.189774	0.89921	0.600217	35.896	28.2647	Other
NCU00914	0.370691	0.676682	0.234329	45.2816	31.5218	Other
NCU00915	0.106081	1	0.87764	38.6104	33.9348	Other
NCU00916	0.42725	0.610199	0.165312	44.9402	30.6886	Other
NCU00917	0.1151	0.995227	0.808558	33.0071	27.9325	Other
NCU00918	0.0624916	1	0.916606	27.841	24.4284	Other
NCU00919	0.622914	0.369365	0.034794	51.2961	29.7909	Other
NCU00920	0.14881	0.941607	0.680261	41.8432	34.4014	Other
NCU00921	-0.301865	0.807509	0.431136	29.0334	32.1202	Other
NCU00922	-0.926779	0.478427	0.076739	12.098	19.2937	Other
NCU00923	0.135449	0.975836	0.764322	37.4351	30.4658	Other
NCU00924	0.246131	0.824162	0.458922	35.8495	27.3044	Other
NCU00925	0.42886	0.653536	0.205529	44.8922	30.0893	Other
NCU00926	0.105416	1	0.872585	36.8929	31.2628	Other
NCU00927	0.397887	0.614686	0.168991	54.4189	37.7554	Other
NCU00928	0.0109876	1	1	27.8029	24.8855	Other
NCU00929	0.113636	1	0.870756	36.2397	30.2139	Other
NCU00930	-0.262531	0.863865	0.534922	24.7027	26.5059	Other
NCU00931	0.323467	0.766351	0.366005	41.1781	29.3854	Other
NCU00932	-0.337187	0.701237	0.273917	31.8848	36.2123	Other
NCU00934	-0.369858	0.803937	0.425539	14.245	16.4961	Other
NCU00935	0.785539	0.225634	0.010644	55.079	28.928	Other
NCU00936	0.16084	0.944983	0.691408	32.2143	26.2376	Other
NCU00937	-0.701396	0.478427	0.0763629	18.5023	27.3226	Other
NCU00938	0.167345	0.955185	0.717027	37.7803	31.1718	Other
NCU00939	0.310168	0.742562	0.33297	46.7633	34.2912	Other
NCU00940	-0.640212	0.626559	0.1814	13.1927	17.5176	Other
NCU00941	-0.199886	0.89921	0.598567	25.8881	26.7532	Other
NCU00943	-0.430463	0.695515	0.261837	22.4024	27.1481	Other
NCU00944	-0.147152	0.954087	0.71532	26.2364	26.6945	Other
NCU00945	0.298733	0.775998	0.385009	43.5289	31.9993	Other
NCU00948	-0.65733	0.605672	0.158852	13.2823	18.6483	Other
NCU00949	0.282679	0.735794	0.320649	50.5902	37.4567	Other
NCU00950	0.473039	0.61422	0.168484	38.7923	25.1512	Other
NCU00951	0.0526404	1	0.978666	26.8247	23.3083	Other
NCU00952	-0.0526256	1	0.897868	28.1266	26.7701	Other
NCU00953	-0.0191435	1	1	31.3816	28.2699	Other
NCU00954	-0.0368878	1	1	30.3452	28.2899	Other
NCU00955	-0.0745015	1	0.90441	32.5267	30.995	Other
NCU00956	-0.0944154	1	0.891972	25.7742	24.4815	Other
NCU00957	-0.184609	0.927494	0.656205	25.7951	26.7771	Other
NCU00958	-0.0883258	1	0.894049	26.271	25.0272	Other
NCU00959	-0.483519	0.639697	0.193027	21.9528	26.7389	Other
NCU00960	-0.00544659	1	1	36.2211	32.87	Other
NCU00962	0.306408	0.729552	0.30965	48.0513	35.4191	Other
NCU00963	0.101636	1	0.918102	29.4832	24.8122	Other
NCU00964	-0.0287281	1	0.963979	37.0599	34.2402	Other
NCU00965	0.226525	0.843592	0.490601	40.6595	31.6729	Other
NCU00966	0.11475	0.975836	0.764322	36.3779	31.0262	Other
NCU00967	0.370943	0.694332	0.25922	44.7236	31.2212	Other
NCU00968	0.144295	0.955185	0.717027	39.4326	31.5137	Other
NCU00969	0.12852	0.967696	0.741734	30.636	25.4404	Other
NCU00970	0.325294	0.699201	0.271094	47.1019	33.735	Other
NCU00971	0.476096	0.478427	0.0735346	60.1438	39.0233	Other
NCU00972	-0.303152	0.87936	0.559248	20.3299	22.8423	Other
NCU00973	-0.111753	1	0.830407	25.7671	24.9866	Other
NCU00974	-0.342146	0.770958	0.379835	22.3913	26.0993	Other
NCU00975	-0.46733	0.63005	0.184832	26.6069	32.6715	Other
NCU00976	-0.744917	0.439206	0.0556117	16.9057	25.9623	Other
NCU00977	0.448633	0.676427	0.231431	36.4112	23.8865	Other
NCU00978	0.33331	0.705465	0.27684	47.96	34.2849	Other
NCU00979	0.638539	0.239192	0.0121194	71.9091	41.9285	Other
NCU00980	0.405086	0.67084	0.228348	43.9289	30.1386	Other
NCU00981	0.190847	0.908959	0.616	37.9656	30.4904	Other
NCU00983	0.527089	0.541103	0.107957	45.3178	28.2657	Other
NCU00984	-0.321839	0.770958	0.378992	27.4904	31.0153	Other
NCU00985	-0.386128	0.68124	0.24246	30.961	36.8176	Other
NCU00986	-0.804298	0.289488	0.0195367	22.8961	35.8511	Other
NCU00987	-0.641691	0.478427	0.075521	22.7959	32.1201	Other
NCU00988	-0.390014	0.743547	0.333947	22.4054	26.3576	Other
NCU00989	-0.585014	0.665563	0.222858	13.1509	17.8954	Other
NCU00990	-0.586195	0.599921	0.153926	16.9873	23.1738	Other
NCU00992	-0.357875	0.812931	0.441723	19.7836	22.6358	Other
NCU00993	-0.164256	0.97559	0.762624	24.0767	24.7377	Other
NCU00994	-0.678852	0.569039	0.126489	16.8777	23.9214	Other
NCU00998	0.177315	0.934243	0.668085	39.2503	31.365	Other
NCU00999	-0.17793	0.924758	0.650087	25.7891	25.7701	Other
NCU01000	0.106965	0.978362	0.773599	39.8153	33.5347	Other
NCU01001	0.654572	0.471851	0.0693122	39.736	22.7527	Other
NCU01002	0.11335	1	0.849729	27.097	22.5575	Other
NCU01003	-0.628834	0.678103	0.23772	14.0717	19.1927	Other
NCU01004	0.368346	0.716118	0.295426	40.8464	28.5227	Other
NCU01005	-0.254038	0.850031	0.504951	27.1048	28.8517	Other
NCU01006	0.284368	0.766351	0.366005	41.2056	29.9953	Other
NCU01007	0.358534	0.735794	0.322298	34.7806	24.4023	Other
NCU01008	0.113297	1	0.862562	30.8555	26.5737	Other
NCU01009	-0.468189	0.682532	0.244252	23.8422	29.4773	Other
NCU01010	-0.923025	0.419187	0.0504785	11.6386	19.9314	Other
NCU01011	-0.580865	0.580246	0.137272	21.6093	27.2462	Other
NCU01012	-0.378976	0.711742	0.2857	28.6725	33.7093	Other
NCU01013	-0.336713	0.770958	0.379835	23.4696	25.9271	Other
NCU01014	-0.785982	0.327331	0.0251742	21.8225	33.945	Other
NCU01015	0.136072	0.971664	0.749969	33.7932	27.2678	Other
NCU01016	0.304032	0.798785	0.418552	36.4372	26.7222	Other
NCU01017	0.339346	0.744317	0.337811	37.159	26.2413	Other
NCU01019	0.300352	0.770958	0.378859	42.6598	31.3694	Other
NCU01021	0.515576	0.620441	0.175883	36.2305	22.7942	Other
NCU01022	0.211327	0.875239	0.553119	35.6867	27.959	Other
NCU01023	0.3874	0.735794	0.322298	34.7853	23.9144	Other
NCU01024	0.477173	0.611817	0.167259	42.5053	27.4042	Other
NCU01025	-0.0532475	1	0.920177	46.9209	43.8817	Other
NCU01026	-0.256319	0.855913	0.519435	28.9594	31.0537	Other
NCU01027	-0.230062	0.892951	0.584135	24.0133	25.3484	Other
NCU01032	-0.00628984	1	1	27.0726	24.6309	Other
NCU01033	-0.680084	0.444104	0.0593525	19.6547	28.8274	Other
NCU01034	-0.755204	0.569039	0.12685	12.8211	18.8351	Other
NCU01036	0.394524	0.63253	0.186249	49.5976	34.3644	Other
NCU01038	-0.263209	0.78372	0.395485	33.7055	38.0411	Other
NCU01039	-0.253866	0.807509	0.429345	34.9352	37.3381	Other
NCU01041	-0.0814879	1	0.842024	30.5311	28.6064	Other
NCU01042	-0.466585	0.607514	0.162324	29.6544	36.8872	Other
NCU01043	-0.812292	0.289488	0.0195367	22.5917	36.0246	Other
NCU01044	-0.0229448	1	1	26.1037	23.927	Other
NCU01045	-0.472227	0.770958	0.37852	14.0739	18.0651	Other
NCU01047	0.433581	0.590226	0.14607	49.7853	33.2162	Other
NCU01048	-0.729252	0.389646	0.0394051	23.1386	33.961	Other
NCU01049	-0.601483	0.541103	0.108166	21.7473	29.4237	Other
NCU01050	-0.87318	0.344554	0.0296377	14.8647	25.084	Other
NCU01051	-0.920103	0.247232	0.0135373	20.0264	33.4223	Other
NCU01052	-0.233278	0.840076	0.484605	30.3246	32.5971	Other
NCU01053	-0.440969	0.67084	0.228083	25.7363	31.3698	Other
NCU01055	-0.720972	0.512909	0.0937486	15.0986	22.203	Other
NCU01057	-0.795366	0.441487	0.0569118	16.174	24.4933	Other
NCU01058	-0.551784	0.518677	0.0970207	25.0263	32.4039	Other
NCU01059	-0.271157	0.81206	0.437859	24.873	26.7001	Other
NCU01060	-0.915281	0.260737	0.014973	16.291	27.8268	Other
NCU01061	-0.254454	0.845954	0.497205	25.7433	27.8579	Other
NCU01063	-0.73766	0.512909	0.0937486	15.2681	22.6301	Other
NCU01064	-0.507454	0.680289	0.241772	19.874	25.7848	Other
NCU01065	0.204866	0.922986	0.644288	33.0609	26.475	Other
NCU01066	0.0800694	1	0.979067	27.8782	23.7971	Other
NCU01067	0.350086	0.729552	0.312175	37.925	27.1283	Other
NCU01068	0.195797	0.944983	0.691408	32.4844	25.7056	Other
NCU01069	0.0859291	1	0.92215	31.7699	27.6427	Other
NCU01070	-0.475013	0.705465	0.278116	17.3495	21.7522	Other
NCU01071	-0.945591	0.344554	0.0292305	13.8359	23.5347	Other
NCU01072	-0.517691	0.725367	0.305773	12.9609	16.6214	Other
NCU01073	-0.736445	0.610309	0.166408	11.5748	17.0395	Other
NCU01074	-0.935822	0.406554	0.0439844	11.639	20.2898	Other
NCU01079	-0.900938	0.363016	0.0338882	14.8064	24.3538	Other
NCU01080	-0.214687	0.915261	0.629572	22.3097	23.4186	Other
NCU01081	-0.477867	0.699201	0.270309	19.5648	24.4253	Other
NCU01082	-0.0282533	1	0.961816	33.5198	30.5771	Other
NCU01083	0.416755	0.626286	0.178875	45.0832	29.8363	Other
NCU01084	-0.196186	0.924758	0.650087	25.8026	26.0637	Other
NCU01085	0.273664	0.826214	0.465725	37.8167	27.8388	Other
NCU01086	0.148684	0.96659	0.7373	30.3049	24.5052	Other
NCU01087	-0.684884	0.404251	0.043001	23.8643	34.897	Other
NCU01088	-0.399309	0.821192	0.45347	16.359	19.0954	Other
NCU01089	-0.251499	0.83588	0.477609	29.7109	31.9075	Other
NCU01091	-0.35137	0.725367	0.30625	27.8428	31.5636	Other
NCU01092	-0.276342	0.914139	0.625992	14.6665	15.585	Other
NCU01093	-0.935847	0.327331	0.0255421	14.0599	24.269	Other
NCU01094	-0.418547	0.736194	0.323759	21.4603	25.5921	Other
NCU01095	0.153332	0.985941	0.78774	27.4801	22.2577	Other
NCU01096	-0.672422	0.665563	0.218873	10.8855	15.1383	Other
NCU01097	0.137138	0.973376	0.757463	35.1528	28.8922	Other
NCU01098	0.157942	0.971664	0.749969	32.5227	26.6805	Other
NCU01099	-0.0920293	1	0.839345	28.4928	27.5947	Other
NCU01100	0.0930437	1	0.862562	31.8698	27.2036	Other
NCU01101	-0.0947741	1	0.9493	19.3861	17.9417	Other
NCU01102	0.2088	0.939469	0.675684	29.3824	22.9599	Other
NCU01103	-0.371589	0.78487	0.398727	19.8847	23.3644	Other
NCU01104	0.242638	0.876745	0.554251	29.1836	21.6137	Other
NCU01105	-0.485186	0.654959	0.211042	23.2153	29.3536	Other
NCU01106	-0.347735	0.812931	0.441723	19.9361	22.6191	Other
NCU01107	-0.332031	0.78487	0.398727	19.5857	23.047	Other
NCU01108	-0.94966	0.308513	0.0223321	14.8059	25.5984	Other
NCU01109	-0.876114	0.327331	0.0259339	16.0872	26.2199	Other
NCU01111	-0.480157	0.636812	0.189259	23.6195	29.6961	Other
NCU01112	-0.781524	0.363016	0.033135	19.0453	30.0623	Other
NCU01113	-0.898933	0.247232	0.0133942	18.4416	30.8348	Other
NCU01114	-0.689104	0.471851	0.0698319	18.0573	25.9286	Other
NCU01115	0.298254	0.83588	0.480504	32.7029	23.8696	Other
NCU01116	0.371488	0.729747	0.314143	33.7456	23.2282	Other
NCU01118	0.131247	0.991137	0.798953	30.2665	25.0774	Other
NCU01119	0.13466	0.947007	0.705048	35.529	29.125	Other
NCU01120	-0.941548	0.192021	0.00680856	19.6014	33.6315	Other
NCU01121	-0.111134	1	0.952997	22.0977	20.8895	Other
NCU01122	0.0206304	1	0.980777	32.8846	29.1656	Other
NCU01123	0.218293	0.847391	0.501816	43.4164	33.6718	Other
NCU01124	-0.699064	0.471851	0.0698319	17.9062	25.8654	Other
NCU01127	-0.856284	0.419187	0.0508367	13.2684	21.6414	Other
NCU01132	-0.790138	0.363016	0.033135	19.66	30.0251	Other
NCU01134	-0.569975	0.571409	0.129151	24.4408	32.3082	Other
NCU01135	0.171014	0.904624	0.607669	47.011	37.9298	Other
NCU01136	-0.466957	0.711742	0.290329	18.2033	22.6222	Other
NCU01138	-0.245053	0.830823	0.47167	35.3375	37.8418	Other
NCU01140	-0.211773	0.882837	0.564081	28.6381	29.6881	Other
NCU01141	0.0538679	1	1	27.5863	23.8305	Other
NCU01142	0.125721	1	0.852583	28.588	23.0137	Other
NCU01143	0.228562	0.884985	0.570201	39.8189	30.1852	Other
NCU01144	0.0872696	1	0.91952	30.2885	26.062	Other
NCU01145	0.00216373	1	1	30.2169	27.809	Other
NCU01146	0.251803	0.886984	0.5758	31.587	23.957	Other
NCU01147	-0.411894	0.770958	0.375915	18.41	21.8311	Other
NCU01148	-0.717871	0.46259	0.0673203	19.2235	28.2374	Other
NCU01149	-0.747364	0.477317	0.0721617	16.2359	24.7299	Other
NCU01150	0.371521	0.716118	0.295426	40.4792	28.2547	Other
NCU01151	-0.411797	0.699201	0.269878	26.7472	32.1903	Other
NCU01154	0.33283	0.750626	0.345196	38.3038	26.964	Other
NCU01156	-0.0267044	1	1	34.0876	31.7334	Other
NCU01157	0.0780283	1	0.926717	36.8108	31.3527	Other
NCU01158	0.143576	0.97559	0.760966	35.5557	29.6005	Other
NCU01159	-0.934378	0.441487	0.0579814	11.472	18.8965	Other
NCU01160	0.227294	0.896276	0.594508	34.6608	26.5412	Other
NCU01161	0.0500681	1	0.981072	33.9867	29.9042	Other
NCU01162	-0.373732	0.744317	0.337123	26.6004	31.1769	Other
NCU01163	-0.526627	0.607514	0.161762	23.2741	30.0043	Other
NCU01164	0.251049	0.798785	0.418507	49.3811	37.7462	Other
NCU01165	0.421211	0.605672	0.157863	47.9432	32.5121	Other
NCU01166	0.136032	0.947007	0.705048	34.7644	29.265	Other
NCU01167	-0.150884	0.960289	0.724806	28.587	28.9231	Other
NCU01169	-0.0117706	1	1	28.7781	26.0218	Other
NCU01170	0.323859	0.788267	0.403774	34.5805	24.6905	Other
NCU01171	0.255666	0.855913	0.51454	37.2107	28.3038	Other
NCU01172	0.386363	0.67084	0.228348	44.0958	30.7056	Other
NCU01173	-0.427852	0.639583	0.192203	27.1867	33.2747	Other
NCU01174	-0.0522933	1	0.961816	32.9486	31.1187	Other
NCU01175	0.339673	0.711742	0.288574	40.3155	28.1144	Other
NCU01176	-0.0323933	1	0.958472	27.7149	25.8891	Other
NCU01177	-0.485552	0.662244	0.216097	19.9731	26.0765	Other
NCU01178	0.0806333	1	0.868846	35.2	29.9367	Other
NCU01179	-0.0202068	1	1	30.0241	27.6603	Other
NCU01180	-0.00218396	1	1	33.6909	31.0617	Other
NCU01181	-0.498942	0.599921	0.153754	21.7407	28.7031	Other
NCU01182	-0.614078	0.580246	0.136037	18.1946	24.6797	Other
NCU01183	-0.0888968	1	0.899629	29.3182	28.3822	Other
NCU01184	0.129633	0.988461	0.791683	28.4492	23.1909	Other
NCU01185	0.0498627	1	0.975662	20.8134	18.0273	Other
NCU01186	0.333348	0.729552	0.30965	48.1817	34.8576	Other
NCU01187	0.0800537	1	0.874339	37.7159	32.8097	Other
NCU01188	-0.00894855	1	1	23.8081	22.3633	Other
NCU01189	-0.00641505	1	1	35.1188	32.7099	Other
NCU01190	0.526233	0.607514	0.161923	37.2717	23.6519	Other
NCU01191	-0.527917	0.676682	0.235413	16.5459	21.5093	Other
NCU01192	0.281614	0.770958	0.375178	48.6523	36.0671	Other
NCU01193	0.360842	0.665563	0.222601	48.0044	33.5409	Other
NCU01195	0.416713	0.620441	0.17593	47.8196	32.4279	Other
NCU01196	0.525389	0.518677	0.0953671	45.9175	28.6019	Other
NCU01197	0.628007	0.294143	0.0204359	61.9037	36.079	Other
NCU01198	0.169306	0.952823	0.713197	37.8414	30.3814	Other
NCU01199	-0.0320734	1	1	30.8973	28.3772	Other
NCU01200	0.00354778	1	1	29.4744	27.529	Other
NCU01201	-0.155722	0.973376	0.757793	23.0116	23.1546	Other
NCU01202	0.0848644	1	0.924537	34.2838	29.5529	Other
NCU01203	0.0266804	1	0.980145	30.3767	27.4038	Other
NCU01204	0.474149	0.589997	0.143187	40.3558	27.1113	Other
NCU01205	0.140216	0.973376	0.757463	33.6346	28.5837	Other
NCU01206	0.347519	0.687057	0.251567	48.6139	34.5112	Other
NCU01207	0.194884	0.855913	0.517341	45.7614	36.4556	Other
NCU01208	0.0342813	1	0.98188	36.449	32.5643	Other
NCU01209	-0.602104	0.452915	0.0608852	26.4874	36.4953	Other
NCU01210	-0.610655	0.452915	0.0608852	26.6038	36.6067	Other
NCU01211	-0.0155685	1	1	30.9034	28.0927	Other
NCU01212	-0.210469	0.896276	0.593851	33.2588	35.0171	Other
NCU01213	-0.477281	0.639697	0.193027	20.9772	26.9634	Other
NCU01214	-0.812737	0.308513	0.0221754	21.4087	35.032	Other
NCU01215	-0.196033	0.932432	0.662013	27.4521	28.1308	Other
NCU01216	0.240977	0.816451	0.445139	40.1335	30.9828	Other
NCU01218	-0.0200705	1	1	23.1423	21.7472	Other
NCU01219	-0.0535182	1	0.957691	26.405	24.9999	Other
NCU01220	0.00140832	1	1	30.0526	26.8602	Other
NCU01221	0.717915	0.196045	0.00755011	67.0812	37.2171	Other
NCU01223	-0.567166	0.542097	0.108921	23.2938	31.7216	Other
NCU01224	0.373347	0.665563	0.222601	48.0536	33.5175	Other
NCU01225	0.0427003	1	1	28.4605	24.8523	Other
NCU01227	0.391835	0.654048	0.209658	40.4882	28.1868	Other
NCU01229	0.168522	0.908959	0.616	38.4863	30.8914	Other
NCU01230	-0.36174	0.735486	0.319819	25.2399	29.0974	Other
NCU01231	-0.871361	0.308513	0.0227571	19.256	31.4245	Other
NCU01233	-0.378448	0.720973	0.30117	22.6272	26.712	Other
NCU01234	0.205704	0.884985	0.570201	39.4319	30.6124	Other
NCU01235	0.325312	0.72506	0.303959	46.6626	34.1375	Other
NCU01236	-0.168415	0.945014	0.692978	22.4574	23.1327	Other
NCU01238	0.360152	0.647289	0.201172	52.4726	37.3662	Other
NCU01240	0.0325075	1	1	31.559	28.687	Other
NCU01241	0.268194	0.797178	0.413992	42.231	31.7425	Other
NCU01242	0.0484243	1	0.926717	35.9941	31.8819	Other
NCU01243	0.325365	0.705465	0.279811	42.6478	30.9946	Other
NCU01245	0.520123	0.547871	0.112579	46.6275	29.1217	Other
NCU01246	-0.366013	0.821192	0.45347	16.0263	18.4795	Other
NCU01247	0.54183	0.419187	0.0485747	56.911	35.339	Other
NCU01248	0.273183	0.81206	0.438829	39.4654	29.5907	Other
NCU01249	0.40638	0.636812	0.190127	46.6091	31.6484	Other
NCU01250	-0.237269	0.87936	0.557305	27.7254	29.227	Other
NCU01252	0.355157	0.676682	0.234329	45.2084	31.849	Other
NCU01253	-0.118972	1	0.827079	24.5374	24.2064	Other
NCU01254	0.421815	0.705465	0.281416	34.6349	22.9926	Other
NCU01255	0.403786	0.647235	0.201022	48.3562	33.0905	Other
NCU01256	0.154967	0.911602	0.62086	39.6293	31.9971	Other
NCU01257	0.329375	0.770958	0.373288	36.7726	25.9589	Other
NCU01258	-0.512659	0.653536	0.2061	19.9976	25.0203	Other
NCU01259	0.19512	0.896276	0.594508	34.0275	27.0544	Other
NCU01260	-0.0366855	1	0.909838	36.5135	34.1094	Other
NCU01261	-0.341009	0.763968	0.360863	30.126	34.0905	Other
NCU01266	0.134915	0.975848	0.76754	37.6707	31.2394	Other
NCU01267	0.265479	0.81206	0.438829	39.3489	29.7357	Other
NCU01268	-0.410242	0.682532	0.244252	23.3859	28.6401	Other
NCU01269	0.273622	0.77905	0.390984	44.8267	33.4707	Other
NCU01270	-0.227318	0.915261	0.629572	21.8842	23.2712	Other
NCU01271	0.58489	0.363016	0.033663	57.1223	33.5988	Other
NCU01272	0.217875	0.886984	0.575476	39.4024	31.1984	Other
NCU01273	0.362336	0.699201	0.266837	40.2349	28.8744	Other
NCU01274	0.121324	1	0.819456	37.635	31.3961	Other
NCU01275	-0.1199	1	0.951856	20.387	20.0472	Other
NCU01276	-0.174129	0.954087	0.71532	27.188	27.5039	Other
NCU01277	0.204134	0.89422	0.588549	33.7132	26.3562	Other
NCU01278	0.231107	0.851477	0.507155	43.7604	33.9824	Other
NCU01279	0.0572087	1	0.980777	33.2278	28.7231	Other
NCU01281	-0.327587	0.763968	0.360863	29.6524	34.1566	Other
NCU01282	0.164374	0.920122	0.638884	32.2667	26.4579	Other
NCU01283	0.427044	0.547871	0.11467	58.4803	39.0802	Other
NCU01284	0.481908	0.618501	0.174935	38.786	25.7889	Other
NCU01285	0.106666	0.996445	0.811467	34.0902	28.9016	Other
NCU01288	0.323056	0.696326	0.2625	50.0977	36.5511	Other
NCU01289	0.0315579	1	1	27.3808	24.8915	Other
NCU01290	0.424085	0.63005	0.184546	45.9207	30.4098	Other
NCU01291	0.211444	0.901955	0.605691	35.2984	28.7282	Other
NCU01294	-0.125846	0.990688	0.796114	33.3856	33.0941	Other
NCU01296	-0.00821858	1	1	29.2633	26.9147	Other
NCU01297	-0.0835257	1	0.896011	27.2795	26.2206	Other
NCU01298	-0.522387	0.665563	0.220197	18.9788	23.5262	Other
NCU01299	-0.884278	0.344554	0.0296377	14.9917	24.985	Other
NCU01300	-0.240156	0.924758	0.646747	16.5734	17.8037	Other
NCU01301	0.102194	1	0.864756	33.7117	27.7902	Other
NCU01302	-0.653597	0.521487	0.0982721	17.6052	25.419	Other
NCU01303	0.124672	0.973376	0.757463	34.4078	29.2477	Other
NCU01304	0.42501	0.605672	0.159977	53.1235	35.7843	Other
NCU01305	0.156961	0.975836	0.764322	37.4137	30.2119	Other
NCU01306	-0.00111801	1	1	34.5368	31.3578	Other
NCU01307	-0.129881	0.957858	0.720183	27.8483	27.7281	Other
NCU01308	-0.688252	0.605672	0.158852	13.0056	18.6193	Other
NCU01309	0.12919	0.992185	0.802314	31.5863	26.048	Other
NCU01310	0.358886	0.711742	0.286065	44.9677	31.0205	Other
NCU01311	-0.441696	0.67084	0.228083	25.0304	30.9036	Other
NCU01312	-0.313942	0.792675	0.407105	25.7003	28.7271	Other
NCU01313	-0.667416	0.626559	0.1814	13.0956	17.6696	Other
NCU01315	0.234784	0.809339	0.433366	52.5478	40.7785	Other
NCU01317	0.732602	0.19332	0.00700467	66.5415	36.2893	Other
NCU01318	0.536195	0.478427	0.075202	50.7908	31.4625	Other
NCU01319	0.184961	0.936795	0.672296	40.2437	32.074	Other
NCU01320	-0.144151	0.947007	0.704781	25.2429	24.9141	Other
NCU01321	-0.149631	0.947007	0.704781	25.2834	24.9303	Other
NCU01322	0.441622	0.65808	0.213224	38.1963	24.8657	Other
NCU01323	0.354581	0.680003	0.238766	51.2575	36.1619	Other
NCU01324	0.315047	0.821192	0.451857	35.5356	25.5586	Other
NCU01325	-0.65944	0.419187	0.0503849	26.2305	37.1118	Other
NCU01326	-0.682445	0.363016	0.0336668	24.3971	36.3142	Other
NCU01327	0.614931	0.361209	0.0317404	54.8391	32.3915	Other
NCU01328	0.43908	0.617288	0.170658	46.2092	31.1289	Other
NCU01329	-0.0711311	1	0.899629	29.6779	27.7666	Other
NCU01330	-0.0222847	1	1	39.4095	36.3975	Other
NCU01331	0.407437	0.701237	0.274297	37.7406	25.7046	Other
NCU01332	0.375345	0.662965	0.216709	51.4151	35.983	Other
NCU01333	0.486452	0.607514	0.161316	41.2325	26.6319	Other
NCU01334	-0.247144	0.911705	0.62189	21.2136	22.8915	Other
NCU01335	0.0632111	1	0.928719	38.1414	33.3719	Other
NCU01336	0.200461	0.935683	0.669884	28.8051	22.4179	Other
NCU01337	-0.300514	0.845954	0.499052	20.3377	22.3302	Other
NCU01338	-0.0799211	1	0.847004	32.1824	30.3392	Other
NCU01339	-0.101795	0.979803	0.779412	29.0308	27.6267	Other
NCU01340	-0.318047	0.830823	0.47161	22.8825	25.3752	Other
NCU01341	0.330355	0.754361	0.35235	38.8337	27.6728	Other
NCU01342	0.229512	0.855913	0.520585	37.7505	29.6002	Other
NCU01343	0.504157	0.575857	0.132098	42.8127	27.374	Other
NCU01344	0.547685	0.478427	0.0727531	53.6852	32.7888	Other
NCU01345	0.427942	0.639917	0.193619	42.8805	28.8316	Other
NCU01346	-0.964505	0.38414	0.037348	11.9881	19.6687	Other
NCU01347	-0.16865	0.946661	0.699053	23.5179	24.2079	Other
NCU01348	-0.679228	0.441487	0.0571606	20.8987	31.0609	Other
NCU01349	0.153946	0.932432	0.663707	37.9038	30.9533	Other
NCU01350	-0.749109	0.435113	0.0540575	17.8539	28.1543	Other
NCU01351	-0.138066	0.947007	0.704781	25.3513	24.8598	Other
NCU01353	0.34821	0.728615	0.308594	41.3485	30.3112	Other
NCU01355	-0.350332	0.821192	0.452234	20.1755	23.5343	Other
NCU01356	-0.460129	0.67084	0.225781	21.3959	26.9747	Other
NCU01357	-0.262158	0.803771	0.423446	27.5787	30.5119	Other
NCU01358	-0.06593	1	0.914435	40.6019	38.3052	Other
NCU01360	0.0617652	1	0.981072	33.3491	29.5872	Other
NCU01361	0.232406	0.823877	0.457154	42.7594	32.8305	Other
NCU01362	0.228179	0.826214	0.46288	43.1304	33.7462	Other
NCU01364	-0.329571	0.807051	0.428782	22.8187	26.3639	Other
NCU01365	-0.246782	0.798785	0.416193	31.4255	35.079	Other
NCU01366	0.248526	0.829754	0.468432	44.6912	34.1814	Other
NCU01367	0.630912	0.392988	0.0399854	50.9127	29.2298	Other
NCU01368	0.209172	0.89921	0.600217	35.0839	27.9786	Other
NCU01369	0.701396	0.245797	0.0125629	59.9722	33.0375	Other
NCU01370	-0.285885	0.851477	0.508786	20.8428	23.1046	Other
NCU01371	-0.524757	0.589997	0.145589	21.5242	27.7293	Other
NCU01373	-0.244611	0.843592	0.49133	32.1215	33.855	Other
NCU01374	-0.317358	0.821927	0.454805	25.804	29.4176	Other
NCU01375	-0.520593	0.676682	0.235413	16.5464	21.4593	Other
NCU01376	-0.41783	0.677901	0.236255	26.6861	31.9993	Other
NCU01377	0.139488	0.97559	0.760966	36.0774	29.4753	Other
NCU01378	0.0694322	1	0.866848	33.6768	29.2694	Other
NCU01379	0.392576	0.623758	0.177383	51.9952	36.0356	Other
NCU01380	-0.670527	0.521487	0.0982721	17.9012	25.146	Other
NCU01381	-0.322874	0.78487	0.398727	20.2128	23.0715	Other
NCU01382	-0.128402	0.941969	0.682613	30.7992	31.3472	Other
NCU01383	-0.665066	0.559957	0.12195	14.0207	20.3461	Other
NCU01385	-0.784302	0.574792	0.131204	12.1642	17.0002	Other
NCU01386	0.415252	0.599921	0.150757	49.0464	34.4075	Other
NCU01387	-0.137643	0.941969	0.682613	31.2203	31.3347	Other
NCU01388	0.336533	0.716118	0.295426	40.4901	29.0551	Other
NCU01389	-0.215722	0.87936	0.557305	27.3669	28.8572	Other
NCU01390	-0.00667373	1	1	28.2893	25.5423	Other
NCU01391	-0.057956	1	0.899629	29.328	27.6889	Other
NCU01392	-0.63089	0.653792	0.207224	12.6985	16.784	Other
NCU01393	0.276132	0.855913	0.519513	31.3019	23.1663	Other
NCU01394	-0.0287686	1	1	35.9671	32.9787	Other
NCU01395	0.262332	0.826214	0.465725	37.8438	28.0752	Other
NCU01397	-0.334494	0.764162	0.362054	24.9171	28.9445	Other
NCU01398	-0.366836	0.770958	0.379835	22.202	26.4006	Other
NCU01399	-0.1165	0.998183	0.815781	21.3702	21.4194	Other
NCU01400	-0.102795	1	0.884921	22.1624	21.7201	Other
NCU01401	0.172425	0.946571	0.696163	33.7529	26.7056	Other
NCU01402	-0.319346	0.763968	0.360863	30.4384	33.8947	Other
NCU01403	0.30142	0.83588	0.480504	32.9427	23.8505	Other
NCU01404	-0.157913	0.954087	0.71532	26.4159	26.8162	Other
NCU01407	-0.144037	0.961667	0.729207	29.9875	29.7448	Other
NCU01408	0.218747	0.884985	0.570201	38.87	30.4236	Other
NCU01409	0.158091	0.924758	0.6466	45.0333	37.0812	Other
NCU01410	0.409177	0.654048	0.209658	40.4627	28.0589	Other
NCU01411	-0.409836	0.695515	0.261599	26.0525	30.9749	Other
NCU01412	0.358732	0.694332	0.260107	39.7134	28.0966	Other
NCU01413	0.457902	0.617723	0.173112	42.8863	28.3571	Other
NCU01414	0.613144	0.381147	0.036352	54.2149	32.0573	Other
NCU01416	-0.740722	0.569039	0.12685	12.3591	18.8383	Other
NCU01417	-0.360142	0.735486	0.319819	24.9299	28.7468	Other
NCU01418	0.118463	1	0.918102	28.7749	24.635	Other
NCU01419	0.198193	0.920122	0.638884	32.0799	25.7791	Other
NCU01420	0.231167	0.87936	0.559036	35.9981	28.4236	Other
NCU01421	0.215696	0.89422	0.588549	33.5746	25.9236	Other
NCU01422	0.222811	0.875239	0.553119	35.2089	27.9448	Other
NCU01423	-0.476019	0.729552	0.312278	16.9762	21.0982	Other
NCU01424	-0.451397	0.729552	0.312278	16.2051	20.3223	Other
NCU01425	-0.147297	0.972357	0.752654	21.0654	22.373	Other
NCU01426	-0.0378816	1	0.959211	28.6824	26.9692	Other
NCU01427	0.16312	0.983117	0.783563	26.4353	21.1084	Other
NCU01428	-0.642468	0.607514	0.162817	15.4324	21.6441	Other
NCU01429	-0.00411896	1	1	28.7112	26.36	Other
NCU01430	-0.208577	0.855913	0.519435	28.4734	30.3962	Other
NCU01431	0.406325	0.599987	0.155392	51.7861	35.2907	Other
NCU01432	-0.39232	0.807509	0.430594	18.4641	21.8859	Other
NCU01433	0.187378	0.927376	0.654405	36.1354	28.5035	Other
NCU01434	-0.795834	0.462482	0.0649698	15.5747	23.6465	Other
NCU01435	0.304101	0.766351	0.366005	40.3469	29.6459	Other
NCU01436	0.100607	0.992185	0.802314	30.6676	26.4953	Other
NCU01438	0.445451	0.547871	0.111023	56.3962	37.8336	Other
NCU01439	0.131109	0.950757	0.709208	35.2865	30.1331	Other
NCU01440	0.397878	0.623758	0.177383	52.5043	36.0465	Other
NCU01441	-0.274142	0.83588	0.480566	23.0174	25.9986	Other
NCU01442	-0.383673	0.720973	0.30117	22.0768	26.7375	Other
NCU01443	-0.0345547	1	1	33.3918	30.9123	Other
NCU01444	-0.0651583	1	0.847004	32.2908	30.4512	Other
NCU01445	0.0860106	1	0.924537	33.6791	29.2934	Other
NCU01446	0.172604	0.944983	0.691408	32.4877	26.0193	Other
NCU01447	0.0957103	1	0.862562	31.9599	27.119	Other
NCU01448	-0.556047	0.687057	0.25371	13.5004	16.6324	Other
NCU01449	-0.194964	0.910023	0.617656	28.593	29.8914	Other
NCU01450	-0.933972	0.419187	0.0504785	11.6691	19.4495	Other
NCU01451	0.024343	1	1	31.5567	28.531	Other
NCU01452	0.584774	0.363432	0.03399	61.9843	37.4948	Other
NCU01453	-0.621283	0.607514	0.162817	15.3634	21.3831	Other
NCU01454	-0.0334548	1	0.962393	33.457	31.4232	Other
NCU01455	0.399028	0.67084	0.227116	39.5726	27.1942	Other
NCU01456	0.152989	0.970985	0.745952	32.0061	25.8874	Other
NCU01457	0.39445	0.645738	0.199628	44.0453	29.9326	Other
NCU01458	0.23261	0.89422	0.588549	33.6367	25.622	Other
NCU01459	0.161049	0.927376	0.654405	35.6758	29.0769	Other
NCU01460	-0.105096	1	0.879373	20.3731	19.4785	Other
NCU01461	0.40915	0.636812	0.190127	45.9711	31.4708	Other
NCU01463	-0.129774	0.978362	0.77555	27.3286	26.8883	Other
NCU01464	-0.244661	0.882837	0.564081	27.5195	30.1832	Other
NCU01465	0.38223	0.647235	0.201022	48.3722	33.4062	Other
NCU01466	0.573692	0.441487	0.0583507	51.663	31.1126	Other
NCU01467	0.193723	0.946571	0.696163	32.9126	26.5416	Other
NCU01468	0.136592	0.952823	0.713197	36.7009	30.9777	Other
NCU01469	0.137725	0.991137	0.798953	30.6334	25.1341	Other
NCU01470	0.176352	0.920122	0.63861	43.4807	35.195	Other
NCU01471	0.279763	0.770958	0.378859	42.1402	31.6351	Other
NCU01472	-0.162254	0.906523	0.609038	36.7221	37.2295	Other
NCU01473	0.440042	0.66734	0.223795	35.5305	23.3112	Other
NCU01474	0.573485	0.536293	0.104999	38.2327	23.0914	Other
NCU01475	0.65621	0.289488	0.019378	58.2027	33.2158	Other
NCU01476	-0.367577	0.750626	0.343707	23.1015	27.1434	Other
NCU01477	0.31065	0.775998	0.387758	37.4749	27.8524	Other
NCU01478	0.283332	0.754361	0.352028	43.9459	32.7461	Other
NCU01479	0.436109	0.607514	0.162836	49.416	33.1169	Other
NCU01480	-0.379038	0.729552	0.310672	24.2257	27.9079	Other
NCU01481	-0.105276	0.978362	0.77555	27.855	26.7077	Other
NCU01483	-0.583281	0.642683	0.19698	15.686	21.4651	Other
NCU01484	0.34661	0.685028	0.245936	47.5364	33.6918	Other
NCU01485	0.38938	0.735794	0.322298	34.8233	23.8674	Other
NCU01486	-0.0971535	1	0.842024	30.0051	28.7423	Other
NCU01487	-0.0817629	1	0.899629	28.4196	27.955	Other
NCU01488	-0.833291	0.478427	0.076739	11.9377	18.402	Other
NCU01489	0.128974	0.971664	0.749969	33.0037	27.2403	Other
NCU01490	-0.548305	0.63005	0.18513	17.5721	23.2232	Other
NCU01491	0.0715596	1	0.870756	36.0464	30.793	Other
NCU01493	0.134118	0.950757	0.709208	36.8177	30.196	Other
NCU01494	0.103966	1	0.85528	29.2174	24.1223	Other
NCU01495	-0.713843	0.441487	0.0571606	21.1237	31.3064	Other
NCU01496	-0.437666	0.63005	0.184832	26.5182	32.5558	Other
NCU01498	0.2481	0.826214	0.46288	42.9977	33.1045	Other
NCU01499	-0.0460162	1	0.960578	30.6312	28.7204	Other
NCU01500	-0.388291	0.738024	0.32863	25.4801	30.2925	Other
NCU01501	0.383971	0.711742	0.289464	34.4655	24.0768	Other
NCU01502	0.242732	0.847391	0.501739	36.7576	27.2819	Other
NCU01503	0.376976	0.680289	0.240392	41.7947	29.0472	Other
NCU01504	0.145466	0.961667	0.7277	27.4143	22.6832	Other
NCU01505	-0.617175	0.50222	0.0851461	21.8431	30.5723	Other
NCU01506	0.281775	0.826214	0.464759	30.3244	22.5748	Other
NCU01509	0.206407	0.924758	0.649456	33.7781	27.456	Other
NCU01510	0.0928495	0.99756	0.814247	35.2803	30.0944	Other
NCU01511	0.126178	0.995227	0.808558	33.2512	27.8715	Other
NCU01512	0.191745	0.941607	0.681189	30.0082	24.0364	Other
NCU01514	-0.129605	1	0.823547	23.8902	23.483	Other
NCU01515	0.313733	0.742562	0.33297	47.052	34.158	Other
NCU01516	0.0916505	1	0.979067	27.9376	23.7917	Other
NCU01517	-0.0353622	1	1	24.411	22.5713	Other
NCU01520	-0.767129	0.478427	0.0742006	14.4012	22.3265	Other
NCU01521	-0.673422	0.478427	0.0732455	19.9046	29.2467	Other
NCU01522	0.0563387	1	0.98188	36.7178	32.262	Other
NCU01523	0.246781	0.87936	0.559036	37.2404	28.3233	Other
NCU01524	0.258895	0.840076	0.484705	40.7714	30.2215	Other
NCU01525	0.127487	1	0.821902	38.2689	32.128	Other
NCU01526	-0.0299269	1	1	31.3826	29.0101	Other
NCU01527	0.537167	0.485096	0.0786722	51.8432	32.0368	Other
NCU01528	-0.741871	0.413627	0.0461444	20.0055	31.4932	Other
NCU01529	-0.38329	0.792097	0.406224	16.7016	19.7287	Other
NCU01530	-0.581663	0.462482	0.0650594	26.8345	37.4016	Other
NCU01531	-0.296443	0.726547	0.306897	37.1181	40.8566	Other
NCU01532	-0.32782	0.716118	0.294213	34.8212	39.338	Other
NCU01534	0.126123	0.961667	0.727656	42.1235	34.5419	Other
NCU01535	0.540913	0.508509	0.0910327	44.8111	27.8288	Other
NCU01536	-0.562632	0.699201	0.269631	14.2357	17.6936	Other
NCU01539	0.0924864	1	0.874339	38.4799	32.234	Other
NCU01540	0.187469	0.913891	0.625541	40.7771	32.204	Other
NCU01541	-0.397942	0.753839	0.348564	20.0678	23.696	Other
NCU01542	0.333907	0.783865	0.39596	33.5915	24.0675	Other
NCU01543	0.300291	0.735794	0.321092	44.7862	32.7775	Other
NCU01545	0.23635	0.855534	0.512327	44.1749	34.8687	Other
NCU01546	0.364864	0.67084	0.228087	46.9285	34.5078	Other
NCU01547	0.337525	0.735486	0.319302	38.997	27.9237	Other
NCU01548	-0.171258	0.973376	0.757793	23.528	23.7606	Other
NCU01549	-0.0500214	1	0.963979	37.0937	34.885	Other
NCU01550	0.434567	0.687057	0.251334	34.6409	23.1453	Other
NCU01551	0.176855	0.96422	0.732629	28.3655	23.0946	Other
NCU01552	0.494465	0.518677	0.0962764	51.9967	34.1213	Other
NCU01553	0.0943046	1	0.916606	27.971	23.8288	Other
NCU01554	0.408515	0.605672	0.159977	53.1982	36.1003	Other
NCU01555	-0.319203	0.770958	0.379835	22.5312	25.9142	Other
NCU01559	0.59195	0.447484	0.0599252	49.1295	29.2372	Other
NCU01560	0.653805	0.206391	0.00865444	72.6075	41.5919	Other
NCU01561	-0.228175	0.871	0.544979	32.5186	34.8372	Other
NCU01562	-0.536271	0.589997	0.145589	21.5887	27.9987	Other
NCU01563	-0.127316	1	0.827079	24.9303	24.2069	Other
NCU01564	-0.0541517	1	0.90441	32.3372	30.3508	Other
NCU01565	-0.00337373	1	1	34.0967	30.4907	Other
NCU01566	-0.647601	0.415423	0.0466641	25.3788	35.5483	Other
NCU01567	0.343805	0.728615	0.308594	42.4037	30.5283	Other
NCU01568	0.191234	0.863865	0.53203	40.4115	31.9913	Other
NCU01569	0.260453	0.823877	0.457154	42.4245	32.294	Other
NCU01570	0.246069	0.83588	0.478602	39.2104	29.6915	Other
NCU01571	0.195981	0.868013	0.542698	42.9189	33.8728	Other
NCU01572	0.0724348	1	0.840203	47.6345	41.107	Other
NCU01573	-0.395199	0.626559	0.180822	36.584	43.2586	Other
NCU01575	0.00708742	1	1	36.7396	32.7581	Other
NCU01577	-0.253808	0.895271	0.591542	24.8869	26.5055	Other
NCU01579	-0.965792	0.308513	0.0223321	14.6567	25.8419	Other
NCU01580	-0.0529998	1	0.957691	26.8114	25.2331	Other
NCU01581	-0.159298	0.932432	0.662013	27.3018	27.6222	Other
NCU01584	0.254652	0.797178	0.413992	41.8948	31.8056	Other
NCU01585	0.138084	0.992185	0.802314	31.2535	25.7612	Other
NCU01587	0.235878	0.875239	0.553119	35.4125	27.8591	Other
NCU01589	0.521055	0.478427	0.075202	51.1147	31.6362	Other
NCU01591	-0.0155456	1	1	33.9205	30.6642	Other
NCU01592	-0.16621	0.89242	0.58135	40.1371	40.8102	Other
NCU01593	-0.245468	0.797178	0.413802	38.1977	40.8441	Other
NCU01595	0.418984	0.610199	0.165312	46.143	30.8124	Other
NCU01596	0.38623	0.676682	0.233829	40.6641	28.065	Other
NCU01597	0.373474	0.642683	0.196271	52.3218	36.2336	Other
NCU01598	-0.174704	0.946661	0.699053	24.5047	24.0882	Other
NCU01599	0.480161	0.569039	0.126842	45.1519	29.5402	Other
NCU01601	-0.0152589	1	1	23.9675	22.2276	Other
NCU01605	0.112029	1	0.85528	28.7926	24.2898	Other
NCU01606	0.328181	0.72506	0.303959	48.2716	33.9934	Other
NCU01607	0.367797	0.735486	0.319302	38.5146	27.3058	Other
NCU01608	-0.00306984	1	1	37.2354	33.692	Other
NCU01610	-0.283719	0.924758	0.646747	16.7078	17.9355	Other
NCU01611	0.278084	0.803937	0.42593	44.3872	33.0125	Other
NCU01612	0.448769	0.597891	0.148827	43.0774	28.1494	Other
NCU01613	0.27596	0.798785	0.418552	36.8363	27.0776	Other
NCU01614	0.110511	1	0.821902	38.3458	32.4353	Other
NCU01615	0.116449	1	0.819456	37.5507	31.2655	Other
NCU01623	-0.242664	0.840076	0.484605	30.4877	32.3223	Other
NCU01625	0.108639	1	0.824251	39.8338	33.0549	Other
NCU01629	-0.0189817	1	1	24.9142	22.9554	Other
NCU01631	-0.418877	0.794327	0.409899	13.1859	15.8227	Other
NCU01632	0.546409	0.427677	0.0524816	55.5674	34.482	Other
NCU01633	0.0730582	1	0.923371	32.8676	28.9859	Other
NCU01634	0.175237	0.934243	0.668085	37.9799	31.3059	Other
NCU01635	0.195687	0.922986	0.644288	33.5587	26.9283	Other
NCU01636	-0.386156	0.762717	0.359488	19.9096	24.2508	Other
NCU01637	0.294478	0.816451	0.444512	33.8733	24.9323	Other
NCU01638	0.448346	0.549923	0.115906	55.309	36.112	Other
NCU01640	0.00552214	1	1	36.2865	34.6205	Other
NCU01642	0.397145	0.614686	0.168991	54.9753	37.7635	Other
NCU01643	0.470667	0.532064	0.103679	54.7244	35.7189	Other
NCU01644	0.257866	0.829754	0.468432	44.4647	33.9216	Other
NCU01645	0.0849719	1	0.864756	33.0921	28.1302	Other
NCU01646	0.289023	0.766351	0.366005	39.8363	29.9436	Other
NCU01647	0.0621323	1	0.866848	33.5353	29.2473	Other
NCU01648	0.255802	0.798885	0.420051	43.1641	32.8764	Other
NCU01649	-0.230944	0.922986	0.643631	24.5016	25.6277	Other
NCU01650	-0.0879432	1	0.836524	27.3497	26.6411	Other
NCU01651	-0.147319	0.978362	0.77555	27.583	27.2771	Other
NCU01652	-0.0504436	1	0.961212	30.9624	30.0139	Other
NCU01653	-0.367178	0.826214	0.466008	16.6118	19.8814	Other
NCU01654	0.19689	0.89242	0.58232	32.6798	25.4432	Other
NCU01655	-0.136021	1	0.823547	23.4813	23.6915	Other
NCU01656	0.207869	0.895271	0.59021	43.4124	33.9507	Other
NCU01657	-0.109169	1	0.879373	20.0685	19.8189	Other
NCU01658	0.177592	0.924758	0.6466	45.8517	36.7819	Other
NCU01659	0.356471	0.699201	0.266837	40.2986	29.0105	Other
NCU01660	-0.554695	0.699201	0.265305	16.1679	21.0613	Other
NCU01664	-0.0500277	1	0.962945	35.1679	32.8235	Other
NCU01665	0.237725	0.855913	0.51454	37.7183	28.9814	Other
NCU01666	0.035669	1	0.980145	30.2622	27.4311	Other
NCU01667	-0.0663288	1	0.894049	26.9344	25.1106	Other
NCU01668	-0.0500401	1	0.962393	34.1627	31.7131	Other
NCU01669	0.282536	0.786424	0.401295	39.9919	29.6877	Other
NCU01670	-0.0125652	1	1	25.0713	23.2528	Other
NCU01672	0.183782	0.896287	0.594792	43.9125	35.1464	Other
NCU01673	0.0112324	1	1	26.3262	24.0289	Other
NCU01674	0.268955	0.83588	0.478602	38.395	29.2521	Other
NCU01675	0.471817	0.547871	0.112538	50.579	32.4398	Other
NCU01678	-0.306177	0.843462	0.489087	24.747	27.5196	Other
NCU01679	0.0554641	1	0.925651	35.1772	30.8263	Other
NCU01680	0.504243	0.478427	0.0763493	57.2329	36.7082	Other
NCU01684	-0.93078	0.441487	0.0579814	11.8038	18.7848	Other
NCU01686	-0.781674	0.521487	0.0995742	12.6861	18.4381	Other
NCU01688	-0.733622	0.369365	0.0348107	23.8056	35.1886	Other
NCU01689	0.262113	0.775998	0.385009	43.49	32.8853	Other
NCU01692	0.41597	0.676682	0.233829	40.9165	27.5375	Other
NCU01695	0.120643	0.99756	0.814247	34.8789	29.3381	Other
NCU01696	0.146991	0.972357	0.753802	33.9473	27.5553	Other
NCU01697	0.157359	0.967696	0.741734	30.8801	24.9531	Other
NCU01698	0.237092	0.851477	0.507155	44.2164	34.0393	Other
NCU01699	0.184631	0.892114	0.580561	40.8375	32.8308	Other
NCU01700	-0.685722	0.507415	0.0902708	16.5025	24.5002	Other
NCU01701	-0.0196348	1	1	34.2566	31.4911	Other
NCU01702	0.68004	0.298815	0.0210548	50.2487	28.843	Other
NCU01703	0.459451	0.605672	0.159891	44.5249	29.3717	Other
NCU01704	-0.16047	0.945014	0.692978	22.5163	23.1444	Other
NCU01705	-0.02598	1	1	23.4662	21.5594	Other
NCU01706	-0.262204	0.908335	0.61371	20.1934	21.7139	Other
NCU01713	-0.237767	0.868013	0.542754	25.0559	26.9083	Other
NCU01715	0.0260945	1	1	30.8962	27.1652	Other
NCU01717	-0.648668	0.462482	0.066972	23.6284	33.2967	Other
NCU01720	0.146844	0.970985	0.745952	30.9674	26.1518	Other
NCU01722	0.459197	0.580246	0.135196	51.2906	33.9196	Other
NCU01724	0.265435	0.867749	0.540537	33.7229	25.7055	Other
NCU01725	0.115029	0.991137	0.798953	30.494	25.5366	Other
NCU01728	0.213908	0.87936	0.559036	36.6143	28.9661	Other
NCU01729	0.292155	0.797178	0.413992	41.5216	31.3044	Other
NCU01731	0.459158	0.580246	0.137367	43.6495	28.9236	Other
NCU01735	-0.785755	0.477317	0.0721617	16.1772	24.8392	Other
NCU01737	0.191969	0.872018	0.547767	43.3964	34.5108	Other
NCU01738	0.239986	0.855913	0.519513	31.0993	23.5806	Other
NCU01739	-0.224008	0.961667	0.728252	17.732	19.0284	Other
NCU01740	-0.185712	0.947007	0.704781	23.9605	25.5081	Other
NCU01741	0.00625427	1	1	27.8582	25.1229	Other
NCU01742	0.122495	0.975836	0.764322	37.6434	30.9486	Other
NCU01744	0.250382	0.821192	0.4529	50.3678	37.624	Other
NCU01745	0.327305	0.742562	0.33295	39.6311	29.6058	Other
NCU01746	-0.644642	0.642259	0.195779	13.2779	19.0232	Other
NCU01747	0.131247	0.955185	0.717027	37.7373	31.7233	Other
NCU01748	0.513886	0.521487	0.0996881	46.0006	29.5355	Other
NCU01750	-0.645488	0.607514	0.162817	15.7349	22.0768	Other
NCU01751	-0.258421	0.863865	0.534922	23.9838	26.2463	Other
NCU01752	0.323504	0.775998	0.38784	32.7188	23.3781	Other
NCU01753	0.384816	0.680289	0.240392	41.3616	28.9754	Other
NCU01754	-0.49958	0.653536	0.2061	19.6501	25.3535	Other
NCU01756	0.565084	0.547871	0.110507	39.4856	23.7107	Other
NCU01757	-0.243562	0.816451	0.445649	30.9535	33.329	Other
NCU01758	-0.0692805	1	0.897868	28.1295	26.7563	Other
NCU01759	-0.116548	0.975848	0.767178	25.0054	24.9583	Other
NCU01760	-0.279552	0.787407	0.402111	30.1819	33.7206	Other
NCU01761	-0.272497	0.830823	0.470325	29.121	31.2648	Other
NCU01762	-0.345408	0.807509	0.430594	19.052	21.1042	Other
NCU01763	0.115158	0.978362	0.773599	40.8265	33.397	Other
NCU01764	-0.224465	0.886984	0.576311	22.6545	23.8672	Other
NCU01765	0.188185	0.895271	0.59021	42.9934	34.3364	Other
NCU01766	-0.25068	0.868013	0.542754	24.9289	26.9601	Other
NCU01767	-0.0795891	1	0.958472	27.6426	26.5284	Other
NCU01768	0.184253	0.89921	0.599224	44.6299	35.9277	Other
NCU01769	0.0892111	1	0.916606	27.6253	24.2383	Other
NCU01771	-0.0793562	1	0.887422	23.0862	21.9565	Other
NCU01772	0.358736	0.687057	0.253084	43.6753	30.678	Other
NCU01776	0.384191	0.599921	0.152597	56.0479	38.3551	Other
NCU01777	0.215202	0.872018	0.547767	43.5181	34.0531	Other
NCU01779	-0.128372	0.979803	0.779412	28.5254	28.1823	Other
NCU01780	-0.681969	0.419187	0.0504949	22.023	31.5115	Other
NCU01781	-0.157426	0.912328	0.62344	28.9333	30.3621	Other
NCU01782	0.267864	0.851477	0.508263	36.758	27.4465	Other
NCU01783	-0.346862	0.770958	0.379835	22.8214	25.9716	Other
NCU01784	0.152009	0.952823	0.713197	37.8748	30.6618	Other
NCU01785	-0.0170425	1	1	29.0067	26.3829	Other
NCU01786	0.255542	0.845954	0.49495	34.5364	25.9061	Other
NCU01788	-0.271558	0.826214	0.46218	22.1345	23.9238	Other
NCU01789	0.45632	0.532064	0.103679	54.5967	36.2194	Other
NCU01790	-0.504329	0.764937	0.363176	14.0519	17.2005	Other
NCU01791	0.0676407	1	0.92215	32.0423	28.1468	Other
NCU01792	0.0813156	1	0.862562	32.16	27.3763	Other
NCU01793	0.509006	0.518677	0.0962764	53.3546	33.6972	Other
NCU01794	-0.374517	0.794067	0.409254	20.9388	24.8144	Other
NCU01795	0.28521	0.754361	0.352028	43.8402	32.7046	Other
NCU01796	-0.240251	0.863865	0.532727	30.5415	32.9622	Other
NCU01797	0.475736	0.518677	0.0962764	52.6417	34.3098	Other
NCU01798	-0.223467	0.867749	0.538974	32.4343	33.6144	Other
NCU01799	-0.609393	0.571409	0.12881	19.4541	26.4106	Other
NCU01800	0.17251	0.942419	0.686423	31.9225	25.2874	Other
NCU01801	0.048618	1	0.982127	37.4992	33.5547	Other
NCU01802	-0.546742	0.559957	0.121654	25.4656	34.03	Other
NCU01803	-0.152649	0.964456	0.733403	30.5929	31.0182	Other
NCU01804	0.089101	1	0.915024	26.8977	23.0025	Other
NCU01805	0.0197052	1	0.979067	27.4489	24.6056	Other
NCU01806	0.175868	0.920122	0.638884	32.9804	26.295	Other
NCU01807	0.0827846	1	0.915024	27.7702	23.3786	Other
NCU01808	-0.0747555	1	0.894049	27.8381	25.1595	Other
NCU01809	0.282647	0.826214	0.465725	36.8634	27.5132	Other
NCU01810	0.0615749	1	0.924537	33.814	29.7928	Other
NCU01811	-0.52764	0.687057	0.251854	14.7665	19.3026	Other
NCU01812	-0.684977	0.569039	0.126489	16.5014	23.9137	Other
NCU01813	0.165875	0.907006	0.610948	37.7363	30.1112	Other
NCU01814	-0.129608	0.987755	0.7899	32.0717	31.1559	Other
NCU01815	-0.255303	0.863865	0.534922	24.003	26.336	Other
NCU01816	-0.140209	0.946661	0.699053	23.2676	23.8582	Other
NCU01817	0.322888	0.720973	0.302097	41.6882	30.0674	Other
NCU01818	0.081255	1	0.864756	32.3654	28.0712	Other
NCU01819	-0.53986	0.607764	0.163548	20.4574	26.9512	Other
NCU01820	0.27997	0.770958	0.369616	47.0842	35.3557	Other
NCU01821	0.00781174	1	1	23.139	20.9188	Other
NCU01822	-0.0468825	1	1	26.5445	24.5862	Other
NCU01823	0.330468	0.687057	0.249064	52.8001	37.922	Other
NCU01824	0.327239	0.746318	0.339487	41.8685	30.2562	Other
NCU01826	0.206414	0.893469	0.58547	42.7613	33.2266	Other
NCU01827	0.479671	0.478427	0.0735346	59.6539	38.8567	Other
NCU01828	-0.182609	0.924758	0.650087	25.0407	25.7866	Other
[truncated: 7,731 more rows]
