# Supplementary material for: The ACF chromatin-remodeling complex is essential for Polycomb repression
Source: eLife. 2022 Mar 8;11:e77595. doi: 10.7554/eLife.77595 (PMC9038196; doi:10.7554/eLife.77595)
Supplement: Figure 3—source data 3. [file elife-77595-fig3-data3.xlsx]

## Sheet: iswi
gene	RNAseq.log2fc	RNAseq.category	H3K27me.log2fc	H3K27me.category			H3K27me genes
NCU04865	2.25449	up	-0.63431	gray			NCU02196
NCU04938	3.64485	up	-0.98809	gray			NCU02867
NCU05071	3.79082	up	-0.38928	gray			NCU03469
NCU05080	2.12758	up	-0.33256	gray			NCU03470
NCU05083	3.07913	up	-0.3485	gray			NCU03472
NCU05097	4.56261	up	-0.99596	gray			NCU03473
NCU05098	2.98861	up	-0.64871	gray			NCU03474
NCU05170	2.80995	up	-0.03134	gray			NCU03475
NCU05176	3.3142	up	0.31623	gray			NCU03476
NCU05184	3.6747	up	0.50422	gray			NCU03581
NCU05187	2.27824	up	-0.50562	gray			NCU03582
NCU05191	4.76071	up	-0.74144	gray			NCU04689
NCU05321	2.75433	up	-0.77949	gray			NCU04690
NCU05467	7.71564	up	0.76754	gray			NCU04691
NCU05655	3.83261	up	0.54601	gray			NCU04694
NCU05658	3.67835	up	0.45169	gray			NCU04695
NCU05676	4.77079	up	-0.31095	gray			NCU04697
NCU05678	3.40786	up	0.29572	gray			NCU04700
NCU05903	2.21129	up	0.57123	gray			NCU04701
NCU06954	7.32486	up	-0.7718	gray			NCU04702
NCU07116	2.59032	up	-0.41136	gray			NCU04703
NCU07150	6.21889	up	0.61914	gray			NCU04704
NCU07152	8.15075	up	-0.000779999	gray			NCU04705
NCU07163	3.72396	up	0.73699	gray			NCU04706
NCU07212	6.1077	up	0.20855	gray			NCU04707
NCU07228	4.20327	up	-0.02838	gray			NCU04708
NCU07249	5.80583	up	-0.1505	gray			NCU04709
NCU07581	2.40364	up	0.2641	gray			NCU04710
NCU07593	4.68834	up	-0.62623	gray			NCU04722
NCU07597	2.26182	up	-0.89336	gray			NCU04852
NCU07609	2.01251	up	-0.49897	gray			NCU04853
NCU08073	3.92442	up	-0.07752	gray			NCU04860
NCU08074	4.92472	up	-0.59738	gray			NCU04862
NCU08089	3.39351	up	-0.59459	gray			NCU04865
NCU08192	5.55297	up	0.91738	gray			NCU04867
NCU08222	6.80751	up	0.11741	gray			NCU04869
NCU08261	5.13798	up	0.38116	gray			NCU04870
NCU08522	3.14786	up	-0.73884	gray			NCU04871
NCU08530	7.89339	up	0.43475	gray			NCU04874
NCU08531	4.2796	up	-0.34674	gray			NCU04875
NCU08533	4.36188	up	-0.41339	gray			NCU04876
NCU08539	5.15225	up	-0.72059	gray			NCU04877
NCU08543	5.43334	up	-0.36505	gray			NCU04879
NCU08546	8.9692	up	-0.62253	gray			NCU04881
NCU08547	6.15115	up	-0.62868	gray			NCU04882
NCU08569	3.09514	up	-0.52657	gray			NCU04883
NCU08570	2.77189	up	-0.05004	gray			NCU04884
NCU08630	3.54399	up	0.64223	gray			NCU04886
NCU08756	5.76209	up	-0.00199	gray			NCU04887
NCU08764	2.32092	up	0.47137	gray			NCU04888
NCU08790	3.25055	up	-0.97281	gray			NCU04889
NCU08796	10.9233	up	-0.22486	gray			NCU04890
NCU08797	4.90926	up	-0.10218	gray			NCU04891
NCU09147	6.81866	up	0.13047	gray			NCU04892
NCU09148	6.47718	up	-0.18156	gray			NCU04893
NCU09165	5.21615	up	0.1844	gray			NCU04894
NCU09306	3.42492	up	0.18024	gray			NCU04896
NCU09431	5.8704	up	-0.85675	gray			NCU04897
NCU09506	3.56581	up	0.53706	gray			NCU04900
NCU09589	8.6362	up	-0.96613	gray			NCU04901
NCU09603	2.939	up	-0.21248	gray			NCU04903
NCU09604	6.45939	up	-0.02542	gray			NCU04908
NCU09605	5.97706	up	-0.06215	gray			NCU04910
NCU09623	6.01944	up	-0.15126	gray			NCU04911
NCU09633	4.14754	up	-0.04608	gray			NCU04912
NCU09635	5.77075	up	0.50185	gray			NCU04914
NCU09636	3.66409	up	0.37333	gray			NCU04915
NCU09637	2.31667	up	0.73481	gray			NCU04916
NCU09639	5.56632	up	0.20348	gray			NCU04917
NCU09640	2.97637	up	0.09732	gray			NCU04918
NCU09650	4.42102	up	0.1437	gray			NCU04919
NCU09855	3.9993	up	0.60846	gray			NCU04920
NCU09856	2.7691	up	0.33364	gray			NCU04922
NCU09907	3.40216	up	0.24595	gray			NCU04923
NCU09951	6.39042	up	0.23355	gray			NCU04926
NCU09952	6.27655	up	0.20284	gray			NCU04928
NCU09953	5.88165	up	0.31201	gray			NCU04934
NCU09955	2.57896	up	0.45434	gray			NCU04935
NCU09956	2.73348	up	0.41796	gray			NCU04937
NCU09966	4.40887	up	0.10482	gray			NCU04938
NCU10285	5.00399	up	0.65709	gray			NCU04947
NCU11365	3.54143	up	-0.19928	gray			NCU04948
NCU16716	2.58321	up	-0.34781	gray			NCU04949
NCU16929	7.60195	up	-0.54715	gray			NCU04950
NCU16930	4.85117	up	-0.76215	gray			NCU04951
NCU17041	2.1362	up	0.05541	gray			NCU04991
NCU17042	3.56576	up	0.08872	gray			NCU04992
NCU17043	2.08062	up	-0.09881	gray			NCU04994
NCU17053	6.17867	up	-0.04616	gray			NCU04997
NCU05470	6.45468	up	1.02634	green			NCU04998
NCU11405	3.50151	up	1.37681	green			NCU05000
NCU17150	3.72569	up	1.05494	green			NCU05004
NCU03474	3.16741	up	-1.88934	red			NCU05017
NCU03476	4.30849	up	-1.81956	red			NCU05018
NCU04697	5.03714	up	-2.21958	red			NCU05048
NCU04702	5.6072	up	-2.85436	red			NCU05049
NCU04703	7.22521	up	-2.74368	red			NCU05055
NCU04706	8.87242	up	-3.17061	red			NCU05056
NCU04707	8.86783	up	-3.142	red			NCU05057
NCU04710	5.13825	up	-2.87556	red			NCU05058
NCU04860	10.4049	up	-2.75183	red			NCU05059
NCU04867	12.2245	up	-3.13276	red			NCU05060
NCU04869	13.8378	up	-3.3105	red			NCU05061
NCU04877	4.94158	up	-3.07203	red			NCU05063
NCU04879	6.65569	up	-3.64338	red			NCU05069
NCU04897	2.95952	up	-3.07871	red			NCU05070
NCU04917	3.21995	up	-3.01008	red			NCU05071
NCU04918	6.20511	up	-2.98669	red			NCU05073
NCU04919	6.13168	up	-2.9041	red			NCU05074
NCU04920	6.14234	up	-2.82839	red			NCU05078
NCU04935	2.37475	up	-2.02453	red			NCU05079
NCU04947	3.15262	up	-1.48337	red			NCU05080
NCU04948	3.03271	up	-1.58438	red			NCU05081
NCU05101	3.68905	up	-1.71251	red			NCU05082
NCU05102	3.01254	up	-1.75502	red			NCU05083
NCU05105	4.32498	up	-1.55439	red			NCU05084
NCU05106	6.14284	up	-1.98332	red			NCU05085
NCU05107	4.8326	up	-1.92849	red			NCU05086
NCU05114	2.05353	up	-1.6965	red			NCU05089
NCU05186	3.47126	up	-1.02196	red			NCU05091
NCU05912	5.75084	up	-2.3374	red			NCU05092
NCU05918	3.44776	up	-1.76712	red			NCU05093
NCU06155	5.21669	up	-1.38358	red			NCU05094
NCU06157	5.48059	up	-1.74797	red			NCU05096
NCU06159	3.48664	up	-1.71526	red			NCU05097
NCU06163	7.88949	up	-2.33778	red			NCU05098
NCU06164	7.65266	up	-1.75697	red			NCU05099
NCU06165	3.88813	up	-2.01576	red			NCU05100
NCU06888	6.5401	up	-2.72418	red			NCU05101
NCU06889	7.41536	up	-2.6225	red			NCU05102
NCU06901	7.28451	up	-2.79378	red			NCU05104
NCU06902	10.1454	up	-3.01536	red			NCU05105
NCU06905	5.98718	up	-2.06935	red			NCU05106
NCU06953	6.47941	up	-1.12559	red			NCU05107
NCU07054	5.45083	up	-2.18459	red			NCU05108
NCU07089	6.68996	up	-1.97697	red			NCU05110
NCU07091	6.93493	up	-2.70913	red			NCU05111
NCU07623	3.51591	up	-2.51401	red			NCU05112
NCU07624	3.21889	up	-2.57472	red			NCU05113
NCU07625	4.8205	up	-2.10869	red			NCU05114
NCU07633	7.23575	up	-2.20833	red			NCU05131
NCU07641	3.89966	up	-2.04436	red			NCU05154
NCU07643	4.44948	up	-1.9002	red			NCU05155
NCU07652	2.6806	up	-2.29225	red			NCU05156
NCU08084	3.82872	up	-1.60193	red			NCU05157
NCU08085	5.37173	up	-2.29228	red			NCU05158
NCU08087	5.19246	up	-1.01535	red			NCU05159
NCU08096	3.33806	up	-1.35054	red			NCU05160
NCU08097	2.13302	up	-1.07762	red			NCU05163
NCU08099	2.68387	up	-1.18033	red			NCU05164
NCU08100	3.39066	up	-1.58564	red			NCU05165
NCU08103	3.20797	up	-2.50484	red			NCU05170
NCU08186	3.43024	up	-1.07256	red			NCU05171
NCU08187	3.70935	up	-1.32683	red			NCU05172
NCU08523	3.31862	up	-1.06736	red			NCU05173
NCU08812	6.1091	up	-2.45509	red			NCU05175
NCU08830	4.36479	up	-2.41241	red			NCU05176
NCU08832	6.09384	up	-2.23383	red			NCU05177
NCU08834	5.57953	up	-2.75155	red			NCU05178
NCU08835	7.16762	up	-2.54757	red			NCU05179
NCU08837	6.3474	up	-2.362	red			NCU05183
NCU08838	4.98163	up	-1.58097	red			NCU05184
NCU08915	7.59466	up	-2.18241	red			NCU05186
NCU09046	2.82258	up	-1.29855	red			NCU05187
NCU09455	4.57925	up	-1.09127	red			NCU05189
NCU09456	3.71489	up	-1.00762	red			NCU05191
NCU09590	7.28986	up	-1.36565	red			NCU05321
NCU09939	4.73686	up	-2.05779	red			NCU05462
NCU09990	2.73462	up	-1.49152	red			NCU05463
NCU10502	12.7225	up	-3.05931	red			NCU05466
NCU12050	2.9369	up	-1.65813	red			NCU05467
NCU12067	2.38037	up	-1.42299	red			NCU05469
NCU12068	2.74592	up	-1.77629	red			NCU05470
NCU12069	7.79451	up	-1.42688	red			NCU05479
NCU12075	4.83698	up	-1.8523	red			NCU05655
NCU16738	8.44738	up	-3.17688	red			NCU05656
NCU16876	5.21276	up	-2.42588	red			NCU05657
NCU16916	5.88493	up	-1.09958	red			NCU05658
NCU17202	7.48415	up	-2.23152	red			NCU05659
NCU17203	9.54921	up	-1.76245	red			NCU05660
NCU05069	-2.62414	down	-0.25782	gray			NCU05661
NCU05070	-2.9396	down	-0.37119	gray			NCU05662
NCU05084	-2.30745	down	-0.08887	gray			NCU05663
NCU05669	-6.0348	down	0.83005	gray			NCU05666
NCU05670	-4.27643	down	0.28287	gray			NCU05669
NCU06420	-2.90927	down	-0.90835	gray			NCU05670
NCU07119	-2.60953	down	0.63901	gray			NCU05671
NCU07124	-2.94961	down	0.74251	gray			NCU05673
NCU07138	-2.11021	down	0.63288	gray			NCU05674
NCU07142	-2.36011	down	0.39687	gray			NCU05675
NCU07232	-10.172	down	0.86144	gray			NCU05676
NCU07234	-3.75604	down	0.47191	gray			NCU05677
NCU07237	-5.12167	down	0.81535	gray			NCU05678
NCU08095	-2.88592	down	-0.8998	gray			NCU05679
NCU08538	-2.09152	down	-0.67914	gray			NCU05699
NCU08557	-3.00161	down	0.11639	gray			NCU05713
NCU08638	-2.24931	down	0.66514	gray			NCU05769
NCU08784	-3.88041	down	0.53683	gray			NCU05845
NCU08907	-7.80217	down	-0.50398	gray			NCU05866
NCU09169	-3.65875	down	0.36339	gray			NCU05886
NCU09170	-6.82172	down	0.47801	gray			NCU05887
NCU09176	-2.6922	down	-0.12787	gray			NCU05888
NCU09181	-3.71958	down	0.38664	gray			NCU05896
NCU09526	-2.92501	down	0.99791	gray			NCU05897
NCU09619	-3.54648	down	0.36138	gray			NCU05899
NCU09630	-3.58621	down	0.47923	gray			NCU05900
NCU09631	-3.06632	down	0.47257	gray			NCU05903
NCU09959	-2.07795	down	0.97811	gray			NCU05906
NCU09964	-4.25816	down	0.82441	gray			NCU05907
NCU10031	-3.00554	down	0.21815	gray			NCU05908
NCU10070	-3.24895	down	0.2954	gray			NCU05909
NCU11088	-2.08184	down	0.06592	gray			NCU05910
NCU11291	-3.71047	down	0.17666	gray			NCU05911
NCU11424	-3.36169	down	0.17713	gray			NCU05912
NCU04998	-2.75713	down	1.72511	green			NCU05914
NCU05897	-6.90414	down	1.68371	green			NCU05918
NCU05899	-2.18512	down	1.37757	green			NCU05919
NCU07134	-2.3228	down	1.2655	green			NCU05920
NCU07231	-2.40742	down	1.36215	green			NCU05921
NCU08641	-2.57806	down	1.16263	green			NCU06155
NCU09182	-4.66682	down	1.10491	green			NCU06157
NCU09183	-3.98785	down	1.01278	green			NCU06159
NCU09523	-2.81472	down	1.62751	green			NCU06161
NCU09904	-5.03465	down	1.64974	green			NCU06163
NCU09906	-5.0012	down	1.02601	green			NCU06164
NCU04722	-2.79517	down	-1.111	red			NCU06165
NCU04914	-4.12754	down	-2.45104	red			NCU06420
NCU04928	-3.15697	down	-1.47696	red			NCU06885
NCU04950	-2.42464	down	-1.47573	red			NCU06886
NCU05154	-2.10739	down	-1.7871	red			NCU06887
NCU03581	2.27346		0.98817	gray			NCU06888
NCU03582	2.35526		0.4857	gray			NCU06889
NCU04991	0.171072		0.67415	gray			NCU06896
NCU04992	-3.59151		0.57483	gray			NCU06897
NCU05017	1.79643		-0.30048	gray			NCU06898
NCU05018	1.25563		-0.21217	gray			NCU06899
NCU05048	-0.692509		-0.39713	gray			NCU06901
NCU05049	1.15949		-0.08687	gray			NCU06902
NCU05056	2.19127		-0.94206	gray			NCU06903
NCU05057	0.849037		-0.95788	gray			NCU06904
NCU05058	2.18323		-0.76285	gray			NCU06905
NCU05059	1.38514		-0.39514	gray			NCU06953
NCU05060	-1.0588		-0.20083	gray			NCU06954
NCU05061	-0.399106		-0.35365	gray			NCU06955
NCU05073	1.47361		-0.02151	gray			NCU07049
NCU05074	0.198306		0.22671	gray			NCU07050
NCU05078	-1.38821		-0.25035	gray			NCU07051
NCU05079	1.20862		-0.10388	gray			NCU07053
NCU05081	0.322508		-0.11336	gray			NCU07054
NCU05082	-1.12142		-0.65797	gray			NCU07055
NCU05085	-0.365355		0.05192	gray			NCU07076
NCU05086	1.84591		-0.25826	gray			NCU07083
NCU05089	0.485453		-0.6791	gray			NCU07084
NCU05093	-0.484736		-0.3843	gray			NCU07085
NCU05094	-1.25808		-0.26961	gray			NCU07086
NCU05096	2.18966		-0.65835	gray			NCU07087
NCU05099	-2.62676		-0.93188	gray			NCU07088
NCU05100	2.33493		-0.98131	gray			NCU07089
NCU05104	2.58008		-0.48638	gray			NCU07090
NCU05110	3.31375		-0.53003	gray			NCU07091
NCU05160	-0.891558		0.75649	gray			NCU07092
NCU05171	-2.50344		-0.23373	gray			NCU07094
NCU05172	1.77933		0.02447	gray			NCU07095
NCU05173	2.11645		0.353	gray			NCU07099
NCU05175	0.433118		0.57209	gray			NCU07102
NCU05178	-0.0965696		0.2802	gray			NCU07103
NCU05179	-2.25677		0.47254	gray			NCU07104
NCU05183	0.362105		0.07541	gray			NCU07105
NCU05462	-2.32674		0.65342	gray			NCU07106
NCU05463	3.82768		0.85964	gray			NCU07107
NCU05466	-1.19581		0.87432	gray			NCU07109
NCU05469	5.83557		0.98643	gray			NCU07110
NCU05479	2.58673		-0.24964	gray			NCU07111
NCU05656	-0.262029		0.39645	gray			NCU07114
NCU05657	-1.55404		0.43264	gray			NCU07115
NCU05659	1.29248		0.05265	gray			NCU07116
NCU05660	-2.0453		0.05013	gray			NCU07119
NCU05661	-2.26585		0.15363	gray			NCU07124
NCU05662	-0.42416		0.46635	gray			NCU07130
NCU05663	0.31941		0.44052	gray			NCU07132
NCU05666	-0.680017		0.23007	gray			NCU07133
NCU05671	-0.00899548		0.22209	gray			NCU07134
NCU05673	1.32822		-0.01446	gray			NCU07136
NCU05674	0.64822		0.23194	gray			NCU07138
NCU05675	4.59314		-0.01286	gray			NCU07139
NCU05677	3.22528		-0.27226	gray			NCU07140
NCU05679	0.237002		0.38758	gray			NCU07142
NCU05699	1.01335		-0.01545	gray			NCU07143
NCU05713	-0.469181		0.83783	gray			NCU07144
NCU05896	-1.64378		0.33276	gray			NCU07145
NCU05900	-1.78861		0.7586	gray			NCU07146
NCU06955	6.20041		-0.78804	gray			NCU07147
NCU07055	1.95426		-0.65901	gray			NCU07148
NCU07099	-0.103069		-0.13086	gray			NCU07149
NCU07102	0.633496		-0.63286	gray			NCU07150
NCU07103	1.38931		-0.80388	gray			NCU07151
NCU07106	1.93566		-0.97077	gray			NCU07152
NCU07110	0.293007		-0.39236	gray			NCU07161
NCU07111	0.0757613		-0.68508	gray			NCU07162
NCU07114	-1.11332		-0.29098	gray			NCU07163
NCU07132	-0.606083		0.45307	gray			NCU07206
NCU07140	1.196		0.64563	gray			NCU07207
NCU07143	-1.37004		0.66733	gray			NCU07208
NCU07144	1.07744		0.7645	gray			NCU07209
NCU07145	-1.78463		0.53871	gray			NCU07210
NCU07146	-1.62752		0.47474	gray			NCU07211
NCU07147	-0.0869391		0.28775	gray			NCU07212
NCU07148	-1.20656		0.35726	gray			NCU07213
NCU07149	0.208458		0.83086	gray			NCU07214
NCU07151	3.51936		0.03859	gray			NCU07215
NCU07161	0.0543355		-0.32846	gray			NCU07216
NCU07207	2.91573		0.7254	gray			NCU07217
NCU07208	-0.686568		0.76622	gray			NCU07218
NCU07209	1.83597		0.61854	gray			NCU07219
NCU07210	-0.0964325		0.2887	gray			NCU07222
NCU07211	-2.91979		0.38045	gray			NCU07224
NCU07213	-2.10587		0.06448	gray			NCU07225
NCU07214	-1.25156		0.36642	gray			NCU07226
NCU07216	0.86873		0.01636	gray			NCU07227
NCU07217	2.17114		-0.11464	gray			NCU07228
NCU07218	-2.97208		-0.22098	gray			NCU07229
NCU07219	0.0542779		-0.47266	gray			NCU07230
NCU07222	-1.24227		-0.16163	gray			NCU07231
NCU07224	0.194221		-0.2883	gray			NCU07232
NCU07225	1.43649		0.14323	gray			NCU07234
NCU07226	-1.02717		0.28689	gray			NCU07235
NCU07227	6.38966		-0.20807	gray			NCU07237
NCU07229	0.583501		0.35347	gray			NCU07241
NCU07230	-1.57239		0.43198	gray			NCU07242
NCU07235	0.861532		0.53533	gray			NCU07243
NCU07242	1.22328		0.55279	gray			NCU07244
NCU07243	-1.12321		0.10452	gray			NCU07245
NCU07244	-2.62596		0.31939	gray			NCU07249
NCU07245	0.0657386		0.13848	gray			NCU07480
NCU07511	0.982458		-0.36717	gray			NCU07510
NCU07518	-0.743254		0.24369	gray			NCU07511
NCU07582	1.49684		0.68212	gray			NCU07518
NCU07592	-0.676286		-0.75702	gray			NCU07581
NCU07594	-0.398545		-0.62517	gray			NCU07582
NCU07595	3.21937		-0.47905	gray			NCU07592
NCU07599	0.326892		-0.41544	gray			NCU07593
NCU07600	-3.76969		-0.3496	gray			NCU07594
NCU07601	-0.785512		-0.68527	gray			NCU07595
NCU07603	-3.44756		-0.15475	gray			NCU07596
NCU07606	0.0543626		-0.93405	gray			NCU07597
NCU07610	0.848496		-0.74165	gray			NCU07599
NCU07617	-0.717748		-0.379	gray			NCU07600
NCU07620	1.58937		-0.91026	gray			NCU07601
NCU07797	-1.0787		-0.88221	gray			NCU07602
NCU08059	-1.78471		-0.16967	gray			NCU07603
NCU08075	-1.02132		-0.2184	gray			NCU07606
NCU08076	-0.470377		-0.04859	gray			NCU07609
NCU08077	1.18136		-0.57819	gray			NCU07610
NCU08079	1.8981		-0.88363	gray			NCU07617
NCU08080	0		-0.70368	gray			NCU07618
NCU08081	1.53803		-0.5631	gray			NCU07620
NCU08113	-0.683889		-0.89016	gray			NCU07622
NCU08116	0.252529		-0.74431	gray			NCU07623
NCU08189	0.149905		0.65462	gray			NCU07624
NCU08200	0.054335		0.77553	gray			NCU07625
NCU08204	1.20887		-0.14305	gray			NCU07626
NCU08206	-0.78554		-0.0932	gray			NCU07627
NCU08207	-2.45712		-0.45556	gray			NCU07628
NCU08208	-2.62596		-0.58739	gray			NCU07629
NCU08209	-1.21633		0.17799	gray			NCU07630
NCU08210	-1.46623		0.14211	gray			NCU07631
NCU08211	-2.22102		0.11108	gray			NCU07632
NCU08212	-2.04528		0.23417	gray			NCU07633
NCU08213	-1.78471		-0.000760002	gray			NCU07634
NCU08219	-2.42104		-0.02178	gray			NCU07635
NCU08220	0.202945		0.09224	gray			NCU07636
NCU08221	3.81249		0.12346	gray			NCU07637
NCU08223	0.0244005		0.07008	gray			NCU07638
NCU08224	-0.0479689		-0.21167	gray			NCU07640
NCU08225	0.951439		-0.34353	gray			NCU07641
NCU08226	1.76675		0.222	gray			NCU07642
NCU08232	-1.66949		0.43289	gray			NCU07643
NCU08233	-0.265674		0.27374	gray			NCU07644
NCU08234	-0.540636		0.14443	gray			NCU07645
NCU08235	-2.27967		0.32698	gray			NCU07646
NCU08236	-3.35185		0.40308	gray			NCU07647
NCU08237	-2.26588		0.25405	gray			NCU07648
NCU08238	-2.28041		0.10267	gray			NCU07651
NCU08240	-0.679964		0.13573	gray			NCU07652
NCU08241	-1.99342		-0.26141	gray			NCU07653
NCU08242	1.53666		-0.26749	gray			NCU07797
NCU08243	0.644277		-0.18975	gray			NCU07802
NCU08244	-0.307164		-0.45917	gray			NCU08049
NCU08245	-3.31834		0.36188	gray			NCU08059
NCU08246	-2.26587		0.27625	gray			NCU08073
NCU08248	-1.2163		0.54532	gray			NCU08074
NCU08250	2.17456		0.53765	gray			NCU08075
NCU08251	-2.44269		0.29125	gray			NCU08076
NCU08252	1.21556		0.56132	gray			NCU08077
NCU08253	1.2689		0.42583	gray			NCU08078
NCU08254	2.48894		0.30239	gray			NCU08079
NCU08255	-1.46628		0.20046	gray			NCU08080
NCU08257	0.170128		0.63019	gray			NCU08081
NCU08258	-0.97914		0.86217	gray			NCU08083
NCU08259	3.29798		0.26974	gray			NCU08084
NCU08260	3.65482		0.36659	gray			NCU08085
NCU08262	0.91047		0.11967	gray			NCU08086
NCU08263	-1.78466		0.17355	gray			NCU08087
NCU08264	-1.84088		0.31535	gray			NCU08089
NCU08265	-3.4097		0.33426	gray			NCU08095
NCU08521	1.23704		-0.20872	gray			NCU08096
NCU08524	1.52476		-0.83284	gray			NCU08097
NCU08532	2.65957		-0.65473	gray			NCU08099
NCU08534	-3.70068		-0.16453	gray			NCU08100
NCU08537	-1.91977		-0.74042	gray			NCU08101
NCU08541	-1.74638		-0.07507	gray			NCU08102
NCU08542	-0.601307		0.03685	gray			NCU08103
NCU08544	-1.58284		-0.44752	gray			NCU08105
NCU08545	-0.448095		0.04933	gray			NCU08106
NCU08548	6.45038		-0.48748	gray			NCU08107
NCU08549	-1.70615		-0.83041	gray			NCU08109
NCU08558	-0.491218		0.02937	gray			NCU08113
NCU08571	0		-0.09025	gray			NCU08116
NCU08572	0.525292		0.05384	gray			NCU08182
NCU08573	-0.679963		-0.05728	gray			NCU08186
NCU08574	-2.45717		-0.09701	gray			NCU08187
NCU08575	-0.680017		0.2536	gray			NCU08188
NCU08576	2.2286		-0.26099	gray			NCU08189
NCU08639	-1.81262		0.29853	gray			NCU08192
NCU08640	-2.56278		0.73353	gray			NCU08200
NCU08752	-0.654088		0.48119	gray			NCU08204
NCU08753	0.155526		0.36649	gray			NCU08206
NCU08755	0.33618		0.7249	gray			NCU08207
NCU08757	3.33798		0.07352	gray			NCU08208
NCU08765	0.0542779		0.18931	gray			NCU08209
NCU08768	0.154995		0.42032	gray			NCU08210
NCU08769	1.03304		0.05341	gray			NCU08211
NCU08770	-1.07498		0.44471	gray			NCU08212
NCU08780	2.02769		-0.93845	gray			NCU08213
NCU08781	-2.04526		0.04341	gray			NCU08219
NCU08785	-0.093383		0.13881	gray			NCU08220
NCU08789	3.31808		-0.75085	gray			NCU08221
NCU08795	0.711424		-0.25333	gray			NCU08222
NCU08865	2.28061		-0.79453	gray			NCU08223
NCU08866	0.0542775		-0.28878	gray			NCU08224
NCU08884	1.49283		-0.7353	gray			NCU08225
NCU08905	0.0489623		-0.83494	gray			NCU08226
NCU08912	4.82144		-0.67293	gray			NCU08232
NCU09150	-1.12326		-0.08946	gray			NCU08233
NCU09151	-0.108457		0.80278	gray			NCU08234
NCU09158	-0.424249		-0.52439	gray			NCU08235
NCU09163	0.0850774		0.04309	gray			NCU08236
NCU09164	-0.907108		-0.79187	gray			NCU08237
NCU09166	-0.0586275		-0.34016	gray			NCU08238
NCU09167	-0.924193		0.4108	gray			NCU08239
NCU09168	-0.314768		0.18329	gray			NCU08240
NCU09171	-2.5574		0.50582	gray			NCU08241
NCU09172	0.302755		0.27481	gray			NCU08242
NCU09173	1.5344		-0.23125	gray			NCU08243
NCU09177	-0.0200086		-0.04438	gray			NCU08244
NCU09178	0.534784		0.26321	gray			NCU08245
NCU09179	-0.384018		0.25688	gray			NCU08246
NCU09180	1.54743		0.19927	gray			NCU08247
NCU09184	-0.716885		0.26723	gray			NCU08248
NCU09185	-1.01948		0.49524	gray			NCU08249
NCU09186	-0.979524		0.58744	gray			NCU08250
NCU09187	-0.262466		0.12121	gray			NCU08251
NCU09188	-0.9069		0.13467	gray			NCU08252
NCU09189	2.67299		0.3858	gray			NCU08253
NCU09190	-1.46626		0.1581	gray			NCU08254
NCU09274	1.98414		-0.80385	gray			NCU08255
NCU09275	1.57261		-0.78185	gray			NCU08256
NCU09276	1.37899		-0.69645	gray			NCU08257
NCU09277	-0.630866		-0.52295	gray			NCU08258
NCU09278	-0.112781		-0.47805	gray			NCU08259
NCU09279	1.18454		-0.36215	gray			NCU08260
NCU09293	0.0192476		-0.41349	gray			NCU08261
NCU09304	1.27648		0.38924	gray			NCU08262
NCU09305	-0.723091		0.26824	gray			NCU08263
NCU09338	3.49831		-0.97778	gray			NCU08264
NCU09490	-1.09591		0.48361	gray			NCU08265
NCU09491	-1.01511		0.35434	gray			NCU08431
NCU09494	-0.156315		0.87449	gray			NCU08521
NCU09495	-1.99541		0.49275	gray			NCU08522
NCU09519	-1.46166		0.72824	gray			NCU08523
NCU09524	-1.29542		0.93836	gray			NCU08524
NCU09525	0.864193		0.47575	gray			NCU08530
NCU09577	2.75733		0.0043	gray			NCU08531
NCU09579	-0.390641		0.46837	gray			NCU08532
NCU09582	-0.593358		0.82878	gray			NCU08533
NCU09584	-0.680017		-0.1135	gray			NCU08534
NCU09585	2.11214		-0.18484	gray			NCU08537
NCU09586	-0.668063		-0.36167	gray			NCU08538
NCU09587	-0.680017		-0.34176	gray			NCU08539
NCU09588	1.32098		-0.55163	gray			NCU08541
NCU09593	2.33239		0.39254	gray			NCU08542
NCU09612	-1.96488		0.44962	gray			NCU08543
NCU09613	1.33874		0.6234	gray			NCU08544
NCU09620	2.16663		0.48736	gray			NCU08545
NCU09627	0.290818		0.10576	gray			NCU08546
NCU09632	0.4342		0.14957	gray			NCU08547
NCU09634	1.64081		0.65756	gray			NCU08548
NCU09638	3.2684		0.66456	gray			NCU08549
NCU09641	0.312347		0.8506	gray			NCU08557
NCU09645	0.38087		0.37183	gray			NCU08558
NCU09651	-1.12277		0.80984	gray			NCU08569
NCU09660	1.67661		-0.75073	gray			NCU08570
NCU09664	-1.35557		-0.10631	gray			NCU08571
NCU09665	-3.26016		-0.01562	gray			NCU08572
NCU09724	1.32602		0.35128	gray			NCU08573
NCU09725	-1.55403		0.57186	gray			NCU08574
NCU09726	-0.0113298		-0.00545001	gray			NCU08575
NCU09851	3.02505		0.97342	gray			NCU08576
NCU09857	1.35169		-0.04528	gray			NCU08630
NCU09908	-3.62146		0.05718	gray			NCU08635
NCU09909	1.63976		0.64511	gray			NCU08638
NCU09947	-0.713483		0.56915	gray			NCU08639
NCU09948	3.10451		0.32661	gray			NCU08640
NCU09949	5.07053		0.20144	gray			NCU08641
NCU09950	5.25378		0.08618	gray			NCU08752
NCU09954	1.87442		0.81285	gray			NCU08753
NCU09957	-1.28891		0.37183	gray			NCU08755
NCU09958	-1.36397		0.98059	gray			NCU08756
NCU09961	-0.621541		0.28477	gray			NCU08757
NCU09965	1.12641		-0.13459	gray			NCU08763
NCU10005	-1.49452		0.23418	gray			NCU08764
NCU10027	-0.734631		0.35776	gray			NCU08765
NCU10030	-1.62584		0.46253	gray			NCU08768
NCU10037	-2.70775		0.3668	gray			NCU08769
NCU10038	0.329601		0.51794	gray			NCU08770
NCU10039	-0.011832		0.53981	gray			NCU08780
NCU10040	-0.138292		0.98683	gray			NCU08781
NCU10055	-0.834706		0.23832	gray			NCU08784
NCU10129	-1.8773		0.54158	gray			NCU08785
NCU10210	1.14016		0.28497	gray			NCU08789
NCU10427	0.939666		0.21476	gray			NCU08790
NCU10501	-2.58401		0.62094	gray			NCU08795
NCU10572	0.570496		0.67099	gray			NCU08796
NCU10605	-0.611536		0.27171	gray			NCU08797
NCU10629	-0.679964		0.14895	gray			NCU08799
NCU10641	1.74594		0.44393	gray			NCU08800
NCU10766	-3.35936		-0.73124	gray			NCU08801
NCU10936	-0.680017		-0.99347	gray			NCU08802
NCU11286	3.19652		0.08586	gray			NCU08812
NCU11292	-0.572749		0.09532	gray			NCU08813
NCU11341	-0.6828		0.45917	gray			NCU08814
NCU11342	-1.67145		0.65513	gray			NCU08818
NCU11363	1.18314		-0.25684	gray			NCU08829
NCU11364	1.57992		-0.49364	gray			NCU08830
NCU12036	-1.46628		0.28294	gray			NCU08832
NCU12039	-1.78471		0.26637	gray			NCU08833
NCU12052	1.56126		-0.96899	gray			NCU08834
NCU12065	-1.03542		0.98099	gray			NCU08835
NCU12144	-3.62146		-0.29181	gray			NCU08836
NCU16305	-0.365334		-0.82216	gray			NCU08837
NCU16600	0		-0.18286	gray			NCU08838
NCU16611	-0.717385		-0.11305	gray			NCU08845
NCU16614	-3.2846		0.17865	gray			NCU08865
NCU16701	-0.00449812		0.17242	gray			NCU08866
NCU16702	-3.0388		-0.35725	gray			NCU08881
NCU16704	-0.134679		0.35711	gray			NCU08883
NCU16705	-0.89906		0.33956	gray			NCU08884
NCU16706	-1.1232		0.12522	gray			NCU08885
NCU16707	-0.437036		0.08845	gray			NCU08905
NCU16718	-3.3662		0.27358	gray			NCU08907
NCU16719	-0.59173		0.31153	gray			NCU08912
NCU16720	-0.301585		-0.9631	gray			NCU08915
NCU16723	-1.46628		-0.04099	gray			NCU08916
NCU16724	0.868924		-0.55834	gray			NCU08917
NCU16904	-0.380424		0.46735	gray			NCU08918
NCU16906	2.44004		0.24033	gray			NCU09026
NCU16928	-1.41523		-0.18865	gray			NCU09046
NCU16936	-0.182072		-0.61923	gray			NCU09147
NCU17044	-0.396219		-0.18318	gray			NCU09148
NCU17054	-1.79012		0.13129	gray			NCU09149
NCU17055	-1.20488		0.62773	gray			NCU09150
NCU17143	-1.12326		-0.31403	gray			NCU09151
NCU17180	-2.26585		0.256	gray			NCU09158
NCU17181	-1.46628		0.07516	gray			NCU09163
NCU04994	0.668159		1.45444	green			NCU09164
NCU04997	-0.521213		1.23597	green			NCU09165
NCU05000	-1.72404		2.11864	green			NCU09166
NCU05004	1.96781		1.22521	green			NCU09167
NCU05163	1.12044		1.09198	green			NCU09168
NCU05164	-0.611335		1.00697	green			NCU09169
NCU05165	1.65103		1.07434	green			NCU09170
NCU05866	-0.999697		1.23695	green			NCU09171
NCU05886	-3.35305		1.27648	green			NCU09172
NCU05887	-0.459297		1.32496	green			NCU09173
NCU05888	0.25085		1.27044	green			NCU09176
NCU07130	-1.53603		1.1797	green			NCU09177
NCU07133	1.61329		1.13001	green			NCU09178
NCU07136	-1.74815		1.21801	green			NCU09179
NCU07139	1.02728		1.54614	green			NCU09180
NCU07162	-0.762863		1.54429	green			NCU09181
NCU07206	-0.271392		1.22445	green			NCU09182
NCU07241	-1.83454		1.41717	green			NCU09183
NCU08049	0.360607		1.15342	green			NCU09184
NCU08635	-1.45866		1.44178	green			NCU09185
NCU08763	-1.20632		1.46056	green			NCU09186
NCU09484	1.80551		1.34436	green			NCU09187
NCU09486	-1.83482		1.87167	green			NCU09188
NCU09487	-0.631519		1.78301	green			NCU09189
NCU09520	-0.865923		1.53588	green			NCU09190
NCU09629	-1.58174		1.04476	green			NCU09274
NCU09652	-0.198978		1.18037	green			NCU09275
NCU09901	0.153674		1.33776	green			NCU09276
NCU09913	1.42541		1.26643	green			NCU09277
NCU09914	-0.478805		1.02689	green			NCU09278
NCU10004	2.76765		1.0143	green			NCU09279
NCU11409	-0.102379		1.00728	green			NCU09293
NCU16905	-2.39999		1.08698	green			NCU09304
NCU17282	-3.57992		1.01864	green			NCU09305
NCU17283	2.77372		1.12593	green			NCU09306
NCU02196	-1.98241		-1.28552	red			NCU09338
NCU02867	1.55876		-1.20958	red			NCU09339
NCU03470	-2.58395		-1.44007	red			NCU09431
NCU03472	1.2589		-1.77732	red			NCU09452
NCU03473	2.25122		-1.87581	red			NCU09453
NCU03475	3.29646		-2.05589	red			NCU09455
NCU04689	2.77183		-2.10725	red			NCU09456
NCU04690	-0.205891		-1.44105	red			NCU09484
NCU04691	1.06959		-1.82789	red			NCU09486
NCU04694	1.68572		-2.44077	red			NCU09487
NCU04695	0.284559		-2.2171	red			NCU09490
NCU04700	2.28013		-2.56358	red			NCU09491
NCU04701	1.19809		-2.93323	red			NCU09494
NCU04704	0.824555		-2.78023	red			NCU09495
NCU04705	3.48236		-3.02921	red			NCU09506
NCU04708	4.15072		-3.16193	red			NCU09519
NCU04709	2.59708		-2.94572	red			NCU09520
NCU04852	1.89475		-2.46228	red			NCU09523
NCU04853	2.01226		-2.25369	red			NCU09524
NCU04862	0.621762		-1.67317	red			NCU09525
NCU04870	6.65362		-2.98228	red			NCU09526
NCU04871	-1.86069		-2.76495	red			NCU09577
NCU04874	0.727181		-2.80533	red			NCU09578
NCU04875	2.27342		-3.02121	red			NCU09579
NCU04876	3.77989		-2.93707	red			NCU09582
NCU04881	-0.369502		-3.05937	red			NCU09584
NCU04882	6.13939		-3.07373	red			NCU09585
NCU04883	1.99328		-2.65811	red			NCU09586
NCU04884	1.32644		-2.16891	red			NCU09587
NCU04886	0.794007		-2.61841	red			NCU09588
NCU04887	-0.80171		-2.72345	red			NCU09589
NCU04888	1.44738		-2.85636	red			NCU09590
NCU04889	0.708629		-2.73043	red			NCU09591
NCU04890	-4.40375		-2.52715	red			NCU09593
NCU04891	-2.21864		-2.64182	red			NCU09603
NCU04892	-1.78468		-2.84425	red			NCU09604
NCU04894	3.33608		-2.8464	red			NCU09605
NCU04896	2.66884		-2.82141	red			NCU09612
NCU04900	1.21961		-3.01527	red			NCU09613
NCU04901	-1.14397		-2.54628	red			NCU09619
NCU04903	1.92366		-1.78676	red			NCU09620
NCU04908	-0.930191		-1.809	red			NCU09623
NCU04910	-0.323569		-2.58026	red			NCU09627
NCU04911	0.890859		-2.9601	red			NCU09629
NCU04912	-1.54465		-2.20958	red			NCU09630
NCU04915	-1.85636		-2.94969	red			NCU09631
NCU04916	4.27274		-2.81111	red			NCU09632
NCU04923	1.27278		-1.64172	red			NCU09633
NCU04926	0.00803973		-2.45145	red			NCU09634
NCU04934	1.6993		-1.50137	red			NCU09635
NCU04937	-1.78471		-2.25117	red			NCU09636
NCU04949	1.71255		-1.60867	red			NCU09637
NCU04951	-0.521541		-1.51851	red			NCU09638
NCU05055	-2.57425		-1.23552	red			NCU09639
NCU05063	0.357638		-1.19033	red			NCU09640
NCU05091	2.3774		-1.21736	red			NCU09641
NCU05092	-3.06329		-1.29162	red			NCU09645
NCU05108	1.94526		-1.21476	red			NCU09650
NCU05111	-2.31844		-1.53181	red			NCU09651
NCU05112	2.32951		-1.09296	red			NCU09652
NCU05113	-0.668002		-1.14309	red			NCU09660
NCU05131	-1.15036		-1.45585	red			NCU09664
NCU05155	1.54917		-2.47463	red			NCU09665
NCU05156	-0.118004		-2.25893	red			NCU09698
NCU05157	-1.8471		-1.85239	red			NCU09724
NCU05158	2.31398		-2.19462	red			NCU09725
NCU05159	0.677217		-1.55881	red			NCU09726
NCU05189	-1.08883		-1.1151	red			NCU09834
NCU05769	-1.46626		-1.81916	red			NCU09835
NCU05906	-0.319394		-1.9492	red			NCU09836
NCU05907	-2.6361		-1.84838	red			NCU09837
NCU05908	0.967066		-2.19214	red			NCU09838
NCU05909	1.75832		-2.41221	red			NCU09839
NCU05910	0.2568		-2.59381	red			NCU09851
NCU05914	-0.761304		-1.39975	red			NCU09855
NCU05919	0.586477		-2.32353	red			NCU09856
NCU05920	0.547858		-1.98955	red			NCU09857
NCU05921	0.235934		-1.5659	red			NCU09901
NCU06161	5.51142		-1.49514	red			NCU09904
NCU06885	-2.0453		-2.56603	red			NCU09906
NCU06886	7.17311		-2.54381	red			NCU09907
NCU06887	2.65783		-2.69017	red			NCU09908
NCU06896	5.36146		-2.78053	red			NCU09909
NCU06897	6.31516		-3.1386	red			NCU09913
NCU06898	5.58654		-3.17198	red			NCU09914
NCU06899	4.41022		-2.95246	red			NCU09939
NCU06903	4.1847		-2.49587	red			NCU09947
NCU06904	-3.77303		-2.68195	red			NCU09948
NCU07049	-0.536184		-2.53197	red			NCU09949
NCU07050	-1.30294		-1.9491	red			NCU09950
NCU07051	2.26904		-2.27219	red			NCU09951
NCU07053	0.510706		-2.16066	red			NCU09952
NCU07076	0.312239		-1.46011	red			NCU09953
NCU07083	0.803202		-1.44915	red			NCU09954
NCU07084	0.58541		-2.43497	red			NCU09955
NCU07085	5.23858		-2.31949	red			NCU09956
NCU07086	3.695		-2.23887	red			NCU09957
NCU07087	4.85948		-1.67437	red			NCU09958
NCU07088	0.81071		-1.72275	red			NCU09959
NCU07090	3.215		-2.28456	red			NCU09961
NCU07092	3.89278		-1.7999	red			NCU09964
NCU07094	-1.77245		-1.49244	red			NCU09965
NCU07095	1.91434		-1.53577	red			NCU09966
NCU07104	6.11422		-1.12311	red			NCU09988
NCU07105	4.94364		-1.09442	red			NCU09990
NCU07107	2.76856		-1.79749	red			NCU10004
NCU07109	-0.986754		-1.27838	red			NCU10005
NCU07115	0.564453		-1.15336	red			NCU10027
NCU07480	3.38638		-1.15385	red			NCU10030
NCU07510	1.75596		-1.0062	red			NCU10031
NCU07596	1.57319		-1.14333	red			NCU10037
NCU07618	-0.144228		-1.01248	red			NCU10038
NCU07622	1.4848		-1.4563	red			NCU10039
NCU07626	0.0741334		-1.77736	red			NCU10040
NCU07627	0.126468		-1.44524	red			NCU10055
NCU07628	-3.53925		-1.52009	red			NCU10070
NCU07629	-0.785584		-1.57332	red			NCU10129
NCU07630	0.810209		-1.6483	red			NCU10210
NCU07631	1.45231		-1.46465	red			NCU10285
NCU07632	-0.163112		-1.88966	red			NCU10344
NCU07634	-0.0428871		-1.92424	red			NCU10427
NCU07635	-0.680017		-2.12393	red			NCU10501
NCU07636	0.585344		-2.13365	red			NCU10502
NCU07637	1.12325		-1.81598	red			NCU10538
NCU07638	3.49954		-2.02375	red			NCU10539
NCU07640	3.11195		-2.16859	red			NCU10572
NCU07642	2.19494		-2.07718	red			NCU10605
NCU07644	0.759894		-2.17797	red			NCU10629
NCU07645	3.29455		-2.48353	red			NCU10641
NCU07646	6.1809		-2.87373	red			NCU10644
NCU07647	4.85681		-2.77482	red			NCU10766
NCU07648	3.71559		-2.45583	red			NCU10936
NCU07651	-0.611711		-2.18151	red			NCU11087
NCU07653	3.87702		-2.28101	red			NCU11088
NCU07802	1.16512		-1.20481	red			NCU11129
NCU08078	2.86603		-1.31078	red			NCU11134
NCU08083	1.22346		-1.19143	red			NCU11286
NCU08086	4.05964		-2.09718	red			NCU11291
NCU08101	1.70716		-1.58161	red			NCU11292
NCU08102	3.38431		-2.07969	red			NCU11341
NCU08105	1.97253		-2.1786	red			NCU11342
NCU08106	2.0906		-1.58113	red			NCU11363
NCU08107	1.38106		-1.58583	red			NCU11364
NCU08109	2.8728		-1.63766	red			NCU11365
NCU08182	-2.77708		-1.36037	red			NCU11405
NCU08188	1.72974		-1.80797	red			NCU11409
NCU08431	1.08982		-1.45163	red			NCU11424
NCU08799	1.55881		-1.87858	red			NCU12036
NCU08800	1.47359		-1.61426	red			NCU12039
NCU08801	0.892901		-1.62282	red			NCU12044
NCU08802	5.84322		-1.45396	red			NCU12045
NCU08813	5.07145		-2.20925	red			NCU12050
NCU08814	1.66296		-2.203	red			NCU12051
NCU08818	-0.636155		-1.52384	red			NCU12052
NCU08829	-0.0832141		-1.99885	red			NCU12065
NCU08833	3.72901		-2.79657	red			NCU12067
NCU08836	5.57123		-2.42822	red			NCU12068
NCU08845	3.21976		-1.77862	red			NCU12069
NCU08881	0.359996		-1.35656	red			NCU12075
NCU08883	-0.679962		-1.5906	red			NCU12076
NCU08885	3.64176		-1.02722	red			NCU12077
NCU08916	9.34834		-1.95607	red			NCU12078
NCU08917	6.71085		-2.11316	red			NCU12137
NCU08918	2.01329		-2.15204	red			NCU12144
NCU09026	-0.848183		-1.69347	red			NCU16305
NCU09339	5.96058		-1.11975	red			NCU16307
NCU09452	0.739323		-1.49405	red			NCU16600
NCU09453	3.00768		-1.88986	red			NCU16611
NCU09591	2.19494		-1.18807	red			NCU16614
NCU09698	-0.437689		-1.04485	red			NCU16701
NCU09834	0.81589		-1.8063	red			NCU16702
NCU09835	5.8077		-2.22383	red			NCU16703
NCU09836	2.79131		-2.54485	red			NCU16704
NCU09837	2.18266		-1.30344	red			NCU16705
NCU09838	1.81722		-1.55045	red			NCU16706
NCU09839	1.47612		-1.55478	red			NCU16707
NCU09988	0.292763		-1.31002	red			NCU16716
NCU10344	2.58507		-2.30773	red			NCU16718
NCU10538	0.992651		-1.59947	red			NCU16719
NCU10539	1.59087		-1.85094	red			NCU16720
NCU10644	5.65818		-3.18081	red			NCU16723
NCU11087	-1.97146		-1.44332	red			NCU16724
NCU11129	-0.432037		-2.27826	red			NCU16728
NCU12044	-0.680017		-2.86545	red			NCU16729
NCU12045	3.05068		-2.96797	red			NCU16738
NCU12051	1.84317		-1.93355	red			NCU16740
NCU12076	4.97203		-2.32628	red			NCU16741
NCU12077	3.85261		-2.99205	red			NCU16742
NCU12078	3.54999		-2.90401	red			NCU16743
NCU12137	2.5405		-1.87515	red			NCU16744
NCU16307	0.568176		-1.7712	red			NCU16745
NCU16728	-0.846543		-2.34767	red			NCU16876
NCU16729	1.30004		-1.73622	red			NCU16904
NCU16740	-0.462191		-2.7604	red			NCU16905
NCU16741	0.657073		-1.49601	red			NCU16906
NCU16742	-1.26055		-2.85811	red			NCU16916
NCU16743	-1.78468		-2.79047	red			NCU16924
NCU16744	1.62576		-2.64482	red			NCU16925
NCU16745	2.02327		-1.77315	red			NCU16926
NCU16924	4.59148		-1.31676	red			NCU16927
NCU16926	3.00768		-2.02089	red			NCU16928
NCU16927	1.47359		-1.49073	red			NCU16929
NCU17066	0.213471		-1.90635	red			NCU16930
NCU17137	0.521673		-1.03544	red			NCU16936
NCU17138	-0.206291		-1.34644	red			NCU17041
NCU17161	-1.12323		-1.57244	red			NCU17042
NCU17170	-1.96541		-2.70116	red			NCU17043
NCU17172	1.7642		-2.74896	red			NCU17044
NCU17263	-0.396598		-1.47502	red			NCU17053
NCU17264	0.489608		-1.07409	red			NCU17054
NCU00021	2.61107	up	0.17409	gray			NCU17055
NCU00031	6.19632	up	-0.17037	gray			NCU17066
NCU00052	3.7821	up	0.23362	gray			NCU17137
NCU00086	2.09358	up	0.31207	gray			NCU17138
NCU00092	2.20305	up	-0.06565	gray			NCU17143
NCU00115	2.20901	up	-0.21178	gray			NCU17150
NCU00118	3.61334	up	-0.07236	gray			NCU17161
NCU00149	10.7984	up	-0.07773	gray			NCU17170
NCU00153	2.61002	up	-0.00039001	gray			NCU17172
NCU00180	3.03959	up	-0.0679	gray			NCU17180
NCU00194	2.06001	up	0.28173	gray			NCU17181
NCU00195	2.12351	up	0.29394	gray			NCU17202
NCU00208	4.32894	up	0.0577	gray			NCU17203
NCU00227	3.06821	up	0.18646	gray			NCU17263
NCU00231	2.49917	up	0.12591	gray			NCU17264
NCU00265	3.065	up	0.28343	gray			NCU17282
NCU00296	3.59842	up	-0.00654003	gray			NCU17283
NCU00312	3.12358	up	-0.07812	gray
NCU00318	3.0942	up	0.04062	gray
NCU00319	2.12828	up	-0.09111	gray
NCU00367	4.02648	up	0.3337	gray
NCU00370	6.57939	up	-0.00030998	gray
NCU00408	2.03206	up	-0.27458	gray
NCU00437	3.461	up	0.04144	gray
NCU00476	2.10578	up	0.01791	gray
NCU00646	2.51172	up	-0.14626	gray
NCU00698	2.47803	up	0.08765	gray
NCU00735	2.09098	up	-0.17829	gray
NCU00742	3.01577	up	-0.06529	gray
NCU00806	9.43253	up	-0.15782	gray
NCU00818	3.23445	up	-0.11046	gray
NCU00819	2.56804	up	-0.05635	gray
NCU00821	2.65953	up	0.29363	gray
NCU00822	8.339	up	-0.01291	gray
NCU00827	2.64718	up	0.0982	gray
NCU00836	4.70781	up	0.19699	gray
NCU00839	5.32937	up	-0.14447	gray
NCU00844	3.10138	up	-0.23094	gray
NCU00845	4.12807	up	0.34583	gray
NCU00850	2.51237	up	-0.31351	gray
NCU00871	3.44863	up	-0.10138	gray
NCU00931	2.20764	up	0.13409	gray
NCU00932	4.80814	up	0.01665	gray
NCU00947	4.33528	up	0.06373	gray
NCU00963	3.20471	up	-0.30018	gray
NCU01000	2.22433	up	0.12077	gray
NCU01011	4.17822	up	0.02446	gray
NCU01014	2.49256	up	0.33856	gray
NCU01042	7.25433	up	0.14956	gray
NCU01050	5.33915	up	-0.0223	gray
NCU01054	4.23038	up	-0.0154501	gray
NCU01064	3.63756	up	-0.19216	gray
NCU01066	6.53338	up	-0.22199	gray
NCU01076	4.99175	up	-0.00651	gray
NCU01083	2.18482	up	-0.0446099	gray
NCU01091	7.5812	up	-0.22079	gray
NCU01095	3.75193	up	0.06148	gray
NCU01115	2.27736	up	0.04171	gray
NCU01195	2.2741	up	0.26862	gray
NCU01196	2.95196	up	0.12821	gray
NCU01212	3.01175	up	-0.05465	gray
NCU01246	2.31192	up	-0.45238	gray
NCU01298	7.45901	up	-0.12548	gray
NCU01311	2.79289	up	-0.04702	gray
NCU01325	5.27978	up	-0.2233	gray
NCU01329	2.58209	up	0.000369991	gray
NCU01351	2.30449	up	-0.06222	gray
NCU01357	2.0381	up	-0.29212	gray
NCU01373	2.30952	up	0.11381	gray
NCU01395	2.27351	up	-0.02803	gray
NCU01407	2.78687	up	-0.00806001	gray
NCU01439	2.26772	up	0.0041	gray
NCU01462	3.67123	up	-0.01723	gray
NCU01496	2.02262	up	0.14406	gray
NCU01561	4.85901	up	0.1563	gray
NCU01562	4.16099	up	-0.28371	gray
NCU01589	2.60196	up	0.14512	gray
NCU01595	2.27399	up	0.31315	gray
NCU01613	2.17443	up	0.32671	gray
NCU01632	2.60134	up	0.128	gray
NCU01651	2.21516	up	0.30427	gray
NCU01653	2.80493	up	0.07544	gray
NCU01667	3.14855	up	-0.01757	gray
NCU01689	2.1348	up	-0.0415	gray
NCU01784	2.51812	up	0.09915	gray
NCU01785	2.58576	up	0.03287	gray
NCU01796	2.44812	up	0.00114001	gray
NCU01830	2.01379	up	0.14306	gray
NCU01849	6.12533	up	0.32905	gray
NCU01894	2.02557	up	0.10152	gray
NCU01995	5.16148	up	0.03307	gray
NCU02021	6.00379	up	-0.05258	gray
NCU02032	4.87076	up	0.18687	gray
NCU02077	3.0394	up	-0.03904	gray
NCU02105	2.20365	up	-0.14444	gray
NCU02146	3.53544	up	0.25786	gray
NCU02155	2.69914	up	0.55229	gray
NCU02184	2.04312	up	0.26408	gray
NCU02215	4.1172	up	0.0655	gray
NCU02246	2.39045	up	0.12216	gray
NCU02274	2.20698	up	0.11759	gray
NCU02306	6.41547	up	0.11969	gray
NCU02316	2.56712	up	0.34578	gray
NCU02321	2.113	up	0.21631	gray
NCU02324	7.56166	up	0.12888	gray
NCU02325	2.89306	up	0.14711	gray
NCU02329	2.08027	up	-0.07659	gray
NCU02339	9.18247	up	0.09444	gray
NCU02340	5.42765	up	0.23144	gray
NCU02346	2.1467	up	0.2787	gray
NCU02361	3.61459	up	0.03514	gray
NCU02383	2.31906	up	0.1383	gray
NCU02477	2.43338	up	0.27722	gray
NCU02486	3.99069	up	0.31186	gray
NCU02487	3.25684	up	-0.04752	gray
NCU02488	3.17272	up	-0.3495	gray
NCU02543	2.59379	up	-0.07501	gray
NCU02593	7.41491	up	-0.47326	gray
NCU02639	2.03443	up	0.39635	gray
NCU02677	3.4186	up	0.17594	gray
NCU02704	2.79311	up	0.08395	gray
NCU02722	3.73066	up	0.17187	gray
NCU02727	2.83558	up	0.0478799	gray
NCU02729	2.56963	up	0.04131	gray
NCU02785	2.00014	up	0.13927	gray
NCU02791	2.16806	up	-0.02084	gray
NCU02857	2.80337	up	-0.52759	gray
NCU02864	5.94897	up	-0.92582	gray
NCU02865	6.95815	up	-0.92642	gray
NCU02879	5.85072	up	-0.29057	gray
NCU02880	6.46252	up	0.37304	gray
NCU02889	5.11411	up	0.14372	gray
NCU02895	3.43135	up	0.04517	gray
NCU02914	5.80497	up	-0.25275	gray
NCU03011	2.5609	up	-0.21018	gray
NCU03018	2.10262	up	0.55703	gray
NCU03030	2.03001	up	0.04286	gray
NCU03078	4.30637	up	0.29159	gray
NCU03092	2.63274	up	-0.06875	gray
NCU03118	2.03437	up	-0.17267	gray
NCU03213	2.68778	up	-0.04189	gray
NCU03247	2.88811	up	0.17925	gray
NCU03287	2.74673	up	0.34726	gray
NCU03294	2.32405	up	0.01665	gray
NCU03351	4.15402	up	-0.22995	gray
NCU03376	6.2085	up	-0.00338998	gray
NCU03424	3.57408	up	0.2043	gray
NCU03468	3.69805	up	-0.32296	gray
NCU03478	3.81035	up	-0.59336	gray
NCU03481	7.79296	up	-0.51242	gray
NCU03484	3.03809	up	0.12687	gray
NCU03499	7.17936	up	-0.7703	gray
NCU03509	2.86952	up	0.20034	gray
NCU03511	5.00781	up	0.14252	gray
NCU03541	4.23847	up	-0.000969962	gray
NCU03560	2.78323	up	0.04552	gray
NCU03561	3.05612	up	0.09886	gray
NCU03575	2.12166	up	0.26027	gray
NCU03584	4.56326	up	0.0883	gray
NCU03608	2.18041	up	0.09448	gray
NCU03618	2.8718	up	0.18913	gray
NCU03639	5.84475	up	0.2831	gray
NCU03696	3.42948	up	-0.29011	gray
NCU03776	2.24077	up	-0.07758	gray
NCU03785	2.4162	up	0.07259	gray
NCU03847	2.12338	up	0.21382	gray
NCU03851	2.30042	up	-0.19848	gray
NCU03934	2.21479	up	-0.00315002	gray
NCU03935	2.33724	up	-0.10319	gray
NCU03977	5.52149	up	0.04273	gray
NCU04016	2.09297	up	-0.23616	gray
NCU04020	2.19441	up	-0.35815	gray
NCU04030	3.49902	up	0.10147	gray
NCU04034	4.25633	up	-0.13003	gray
NCU04038	3.00356	up	0.13041	gray
NCU04039	2.79552	up	-0.04221	gray
NCU04047	2.22322	up	-0.16149	gray
NCU04138	2.32988	up	0.2408	gray
NCU04169	2.92905	up	0.39445	gray
NCU04216	2.07429	up	0.37632	gray
NCU04222	6.10661	up	0.3461	gray
NCU04228	4.19096	up	0.26203	gray
NCU04230	2.69478	up	0.0371	gray
NCU04234	7.83738	up	0.32554	gray
NCU04277	2.3928	up	-0.30484	gray
NCU04280	2.20931	up	0.0283	gray
NCU04282	5.62448	up	0.38486	gray
NCU04292	2.53925	up	-0.07679	gray
NCU04303	3.35192	up	0.01179	gray
NCU04334	2.12447	up	-0.18184	gray
NCU04339	2.27686	up	-0.02589	gray
NCU04356	8.47397	up	-0.17047	gray
NCU04366	6.04383	up	-0.13842	gray
NCU04367	2.18364	up	0.12244	gray
NCU04385	2.20756	up	-0.0181	gray
NCU04466	2.48401	up	-0.25532	gray
NCU04467	2.06861	up	-0.17749	gray
NCU04490	6.26242	up	-0.0867	gray
NCU04500	7.5034	up	0.02111	gray
NCU04537	2.39056	up	-0.06976	gray
NCU04542	3.9533	up	0.13664	gray
NCU04546	2.27438	up	0.14537	gray
NCU04547	6.22119	up	0.07523	gray
NCU04561	3.50905	up	-0.21943	gray
NCU04573	5.66041	up	-0.0867	gray
NCU04575	2.89517	up	0.24837	gray
NCU04579	2.33467	up	0.04865	gray
NCU04583	5.15171	up	0.01358	gray
NCU04608	4.23124	up	-0.1323	gray
NCU04616	4.54721	up	-0.06492	gray
NCU04618	2.85347	up	0.29172	gray
NCU04625	5.39711	up	0.09719	gray
NCU04630	4.94774	up	-0.1556	gray
NCU04647	2.31925	up	0.13278	gray
NCU04740	2.62716	up	0.07077	gray
NCU04754	2.19213	up	0.1547	gray
NCU04768	2.41549	up	0.17927	gray
NCU04778	2.60213	up	0.07304	gray
NCU04787	2.9493	up	-0.0493299	gray
NCU04788	2.33103	up	0.14923	gray
NCU04936	2.45397	up	-0.72628	gray
NCU04960	4.47494	up	-0.70958	gray
NCU05014	2.15889	up	0.87323	gray
NCU05036	6.02314	up	0.10025	gray
NCU05037	2.94152	up	-0.01304	gray
NCU05038	3.43017	up	0.25131	gray
NCU05045	2.29323	up	0.24174	gray
NCU05046	2.99082	up	-0.30037	gray
NCU05128	2.12559	up	0.02939	gray
NCU05207	2.28156	up	0.19012	gray
NCU05208	2.02932	up	0.27373	gray
NCU05217	2.04574	up	0.25572	gray
NCU05230	3.2393	up	-0.25339	gray
NCU05268	2.16535	up	0.3188	gray
NCU05300	2.26367	up	0.04491	gray
NCU05317	2.50796	up	0.21657	gray
NCU05318	2.13392	up	0.18656	gray
NCU05319	6.07937	up	0.24964	gray
NCU05358	2.76583	up	0.00652999	gray
NCU05378	3.62205	up	-0.09486	gray
NCU05410	2.63055	up	-0.04906	gray
NCU05477	4.87249	up	0.41767	gray
NCU05506	2.32252	up	-0.431	gray
NCU05516	2.2882	up	-0.0318	gray
NCU05518	3.98091	up	0.36154	gray
NCU05526	2.18092	up	0.1529	gray
NCU05540	2.23879	up	0.3608	gray
NCU05542	2.30615	up	-0.26159	gray
NCU05548	2.82073	up	-0.1248	gray
NCU05574	3.76234	up	-0.2	gray
NCU05580	3.03982	up	0.2429	gray
NCU05586	2.63153	up	0.0335901	gray
NCU05604	2.37739	up	0.11118	gray
NCU05609	2.66772	up	0.1274	gray
NCU05612	5.23727	up	-0.19815	gray
NCU05613	4.87565	up	-0.59753	gray
NCU05616	2.90548	up	-0.14651	gray
NCU05629	2.80851	up	0.00335	gray
NCU05650	2.58086	up	0.35569	gray
NCU05651	3.19172	up	-0.04003	gray
NCU05681	2.86906	up	0.76304	gray
NCU05707	4.16046	up	0.34731	gray
NCU05758	5.50003	up	-0.45487	gray
NCU05764	8.09878	up	-0.81587	gray
NCU05768	6.74433	up	-0.7021	gray
NCU05812	4.1096	up	0.02825	gray
NCU05821	4.06792	up	-0.02876	gray
NCU05822	5.65965	up	0.34771	gray
NCU05823	3.01473	up	0.17891	gray
NCU05932	2.9541	up	-0.24996	gray
NCU05948	2.71259	up	-0.3388	gray
NCU05977	2.18844	up	0.40154	gray
NCU06019	2.50783	up	-0.14879	gray
NCU06048	2.06268	up	-0.39545	gray
NCU06088	2.09411	up	-0.0393	gray
NCU06098	3.07089	up	-0.0317699	gray
NCU06129	3.43595	up	-0.27735	gray
NCU06136	2.38063	up	0.14994	gray
NCU06140	2.49042	up	-0.10579	gray
NCU06235	2.30062	up	-0.10858	gray
NCU06288	7.2423	up	0.15918	gray
NCU06301	2.18878	up	-0.24061	gray
NCU06336	2.07131	up	0.49442	gray
NCU06359	3.49324	up	0.17166	gray
NCU06376	3.63666	up	0.11364	gray
NCU06384	5.96459	up	-0.05891	gray
NCU06409	2.31798	up	0.31324	gray
NCU06434	6.29946	up	-0.31971	gray
NCU06475	6.37799	up	0.15711	gray
NCU06480	2.13243	up	-0.08847	gray
NCU06514	3.37517	up	-0.28001	gray
NCU06548	3.53796	up	-0.0366401	gray
NCU06559	2.3583	up	-0.16394	gray
NCU06573	2.98295	up	0.36572	gray
NCU06574	3.22242	up	-0.0179	gray
NCU06581	4.95437	up	0.00523002	gray
NCU06590	9.39178	up	0.03616	gray
NCU06591	8.58029	up	-0.1894	gray
NCU06604	2.81267	up	0.14576	gray
NCU06613	2.54944	up	0.000369991	gray
NCU06629	2.00657	up	0.16966	gray
NCU06650	4.40193	up	-0.44491	gray
NCU06689	2.01393	up	-0.30528	gray
NCU06693	2.75194	up	-0.1394	gray
NCU06721	2.10991	up	-0.12553	gray
NCU06725	2.60946	up	-0.14036	gray
NCU06752	2.27758	up	0.12723	gray
NCU06784	2.94356	up	-0.1851	gray
NCU06792	4.05831	up	-0.0547	gray
NCU06793	8.02723	up	0.28402	gray
NCU06822	5.90412	up	0.29097	gray
NCU06823	4.06359	up	0.04919	gray
NCU06911	3.7255	up	-0.03765	gray
NCU06916	2.96885	up	-0.35772	gray
NCU06917	5.5431	up	-0.12025	gray
NCU06919	3.71607	up	-0.144	gray
NCU06920	3.994	up	-0.40957	gray
NCU06933	2.05785	up	0.11551	gray
NCU06936	3.59708	up	0.17452	gray
NCU06938	4.21265	up	0.11208	gray
NCU06964	4.67044	up	0.16026	gray
NCU07036	3.08083	up	-0.43038	gray
NCU07043	3.14092	up	-0.63169	gray
NCU07044	3.11707	up	-0.55691	gray
NCU07046	3.38844	up	-0.64433	gray
NCU07156	2.38177	up	0.13237	gray
NCU07159	2.09766	up	0.87124	gray
NCU07176	2.95757	up	0.44791	gray
NCU07180	4.41106	up	0.15302	gray
NCU07201	6.33788	up	0.99338	gray
NCU07266	2.01591	up	0.16009	gray
NCU07309	2.03757	up	0.24109	gray
NCU07331	2.1331	up	-0.07782	gray
NCU07370	7.80515	up	-0.08509	gray
NCU07398	2.02976	up	0.0760001	gray
NCU07410	4.60593	up	0.14159	gray
NCU07433	3.78764	up	-0.14244	gray
NCU07452	2.78726	up	-0.21721	gray
NCU07485	2.18777	up	0.1495	gray
NCU07500	7.21609	up	-0.44959	gray
NCU07501	5.8337	up	-0.63434	gray
NCU07507	2.70018	up	-0.10876	gray
NCU07508	3.44895	up	-0.22815	gray
NCU07517	2.93969	up	0.8297	gray
NCU07614	2.61212	up	-0.13064	gray
NCU07621	2.38276	up	-0.73299	gray
NCU07714	3.11544	up	-0.17346	gray
NCU07722	3.79826	up	0.02002	gray
NCU07732	2.55434	up	0.085	gray
NCU07752	9.98718	up	-0.21486	gray
NCU07755	2.30609	up	0.29129	gray
NCU07760	3.16556	up	0.03692	gray
NCU07774	2.53748	up	0.05389	gray
NCU07789	4.36843	up	-0.28706	gray
NCU07801	4.72065	up	-0.89362	gray
NCU07810	3.99455	up	0.30371	gray
NCU07884	2.2427	up	-0.02918	gray
NCU07896	2.54204	up	0.30593	gray
NCU07897	3.52609	up	-0.07835	gray
NCU07898	5.68717	up	-0.19884	gray
NCU07906	2.13093	up	-0.15081	gray
NCU07920	3.71766	up	-0.00102002	gray
NCU07923	2.59333	up	0.00770998	gray
NCU07942	2.77236	up	-0.17298	gray
NCU07966	3.56082	up	0.02576	gray
NCU07969	3.6982	up	-0.06511	gray
NCU07978	5.16237	up	0.0536601	gray
NCU07981	5.85899	up	0.23196	gray
NCU07982	2.00248	up	0.13965	gray
NCU08030	2.23759	up	0.02441	gray
NCU08032	2.32598	up	0.00245	gray
NCU08117	2.87098	up	-0.51632	gray
NCU08138	2.98319	up	0.01698	gray
NCU08152	3.28342	up	0.00270996	gray
NCU08153	2.32126	up	-0.48317	gray
NCU08162	2.47499	up	-0.2917	gray
NCU08183	3.56604	up	-0.62531	gray
NCU08355	2.56006	up	-0.02245	gray
NCU08358	3.10724	up	-0.16605	gray
NCU08361	4.44191	up	-0.18671	gray
NCU08368	2.7403	up	0.21127	gray
NCU08371	2.05537	up	0.37503	gray
NCU08383	2.99382	up	0.0267	gray
NCU08390	2.92686	up	-0.32222	gray
NCU08404	2.79587	up	0.41697	gray
NCU08421	2.0369	up	0.02459	gray
NCU08432	2.88637	up	-0.82616	gray
NCU08437	6.38008	up	-0.49684	gray
NCU08473	2.2624	up	0.29668	gray
NCU08478	2.3377	up	0.45226	gray
NCU08510	2.04918	up	0.13331	gray
NCU08535	2.98076	up	0.48897	gray
NCU08649	2.80813	up	-0.12456	gray
NCU08654	8.32304	up	0.36013	gray
NCU08692	2.12124	up	-0.03957	gray
NCU08724	4.08844	up	-0.05771	gray
NCU08786	2.49534	up	0.14813	gray
NCU08853	5.83045	up	-0.68791	gray
NCU08863	4.95064	up	0.13807	gray
NCU08864	2.99068	up	-0.06341	gray
NCU08887	2.94644	up	-0.0381299	gray
NCU08894	2.05122	up	-7.99701e-05	gray
NCU08923	2.2199	up	0.14297	gray
NCU08952	2.02279	up	0.10943	gray
NCU08968	2.28845	up	-0.10957	gray
NCU08969	7.20661	up	0.23622	gray
NCU08980	2.37723	up	0.01521	gray
NCU09028	3.97752	up	-0.74233	gray
NCU09093	5.27055	up	0.4157	gray
NCU09094	2.47947	up	-0.00208997	gray
NCU09116	2.62667	up	0.00767006	gray
NCU09193	2.70629	up	0.08938	gray
NCU09264	2.3141	up	-0.1713	gray
NCU09280	2.55515	up	-0.55798	gray
NCU09402	3.7556	up	0.12312	gray
NCU09406	2.46032	up	-0.30952	gray
NCU09412	5.98847	up	-0.48118	gray
NCU09415	2.85308	up	-0.31154	gray
NCU09423	2.14481	up	-0.07456	gray
NCU09430	2.25306	up	-0.56746	gray
NCU09434	3.64214	up	0.24874	gray
NCU09465	2.1722	up	0.19541	gray
NCU09489	2.77125	up	0.4716	gray
NCU09497	3.59899	up	0.29453	gray
NCU09498	3.18199	up	0.82427	gray
NCU09499	2.02494	up	0.6353	gray
NCU09543	2.46485	up	-0.13218	gray
NCU09564	2.73652	up	0.66199	gray
NCU09565	3.11284	up	0.35508	gray
NCU09568	2.51127	up	0.48255	gray
NCU09569	4.6101	up	0.45573	gray
NCU09570	2.61439	up	0.2476	gray
NCU09596	3.02738	up	0.70007	gray
NCU09597	4.22566	up	0.62148	gray
NCU09691	4.305	up	-0.27551	gray
NCU09695	4.85601	up	-0.09806	gray
NCU09708	2.21084	up	0.14845	gray
NCU09742	2.07287	up	-0.03293	gray
NCU09767	2.27569	up	0.77636	gray
NCU09781	2.97497	up	-0.244	gray
NCU09794	2.3432	up	0.35367	gray
NCU09796	3.48299	up	0.1954	gray
NCU09817	2.39838	up	0.19903	gray
NCU09848	2.88736	up	0.66656	gray
NCU09923	3.27842	up	0.10037	gray
NCU09924	3.79893	up	-0.14342	gray
NCU09971	3.13262	up	0.09321	gray
NCU10152	4.45418	up	-0.38026	gray
NCU10186	3.62216	up	-0.06878	gray
NCU10220	2.06181	up	-0.30253	gray
NCU10276	4.31291	up	0.62669	gray
NCU10387	3.03611	up	0.53676	gray
NCU10392	2.40624	up	-0.0811299	gray
NCU10393	2.36991	up	0.1525	gray
NCU10444	6.44818	up	-0.22647	gray
NCU10521	3.548	up	-0.36939	gray
NCU10591	3.80616	up	-0.26469	gray
NCU10610	2.1337	up	-0.25635	gray
NCU10799	4.86702	up	-0.00686997	gray
NCU10889	4.66503	up	-0.06253	gray
NCU10932	2.83335	up	0.12231	gray
NCU11030	2.04541	up	0.11893	gray
NCU11175	2.05242	up	0.22878	gray
NCU11289	2.35182	up	0.8531	gray
NCU11290	4.47305	up	-0.02981	gray
NCU11320	2.50412	up	-0.07061	gray
NCU11321	2.11592	up	-0.18434	gray
NCU11356	2.90249	up	0.09312	gray
NCU11380	3.17765	up	-0.04493	gray
NCU12025	6.46069	up	0.09636	gray
NCU12085	2.10154	up	-0.18958	gray
NCU12112	2.12208	up	0.09548	gray
NCU16321	6.68708	up	-0.00911996	gray
NCU16341	4.59839	up	0.11231	gray
NCU16402	3.20799	up	-0.70874	gray
NCU16482	5.7253	up	-0.6156	gray
NCU16483	6.51795	up	-0.3543	gray
NCU16492	2.45063	up	0.18471	gray
NCU16555	2.05375	up	-0.20736	gray
NCU16616	2.69453	up	0.16229	gray
NCU16632	4.35311	up	-0.1119	gray
NCU16633	5.75661	up	-0.13497	gray
NCU16648	3.59806	up	-0.06555	gray
NCU16695	2.74162	up	-0.2432	gray
NCU16715	2.27263	up	-0.038	gray
NCU16803	2.59783	up	-0.05031	gray
NCU16805	6.2941	up	-0.08875	gray
NCU16823	3.01705	up	0.00759998	gray
NCU16898	2.11033	up	-0.00364998	gray
NCU16939	3.21876	up	-0.46342	gray
NCU17026	3.95927	up	-0.08406	gray
NCU17105	3.29875	up	0.15709	gray
NCU17157	3.53104	up	-0.56282	gray
NCU17171	3.28304	up	-0.94884	gray
NCU17186	4.49405	up	-0.267	gray
NCU17247	3.54994	up	-0.15425	gray
NCU17257	3.71849	up	-0.19606	gray
NCU17267	4.51492	up	-0.89956	gray
NCU17268	6.54504	up	-0.46057	gray
NCU17269	4.22399	up	-0.20782	gray
NCU05001	2.20248	up	1.62875	green
NCU05015	4.764	up	1.48299	green
NCU05472	8.42102	up	1.40702	green
NCU05870	2.27802	up	1.16785	green
NCU07200	3.81561	up	1.17995	green
NCU08056	3.24039	up	1.06735	green
NCU08625	2.37104	up	1.36109	green
NCU09504	2.44582	up	1.39542	green
NCU09505	2.16645	up	1.21694	green
NCU09648	5.18064	up	1.08208	green
NCU09854	3.64621	up	1.77674	green
NCU16346	2.77409	up	1.04766	green
NCU16538	6.1448	up	1.15432	green
NCU02197	2.07817	up	-1.08135	red
NCU02866	7.17778	up	-1.12871	red
NCU03477	5.41362	up	-1.52338	red
NCU04939	2.90944	up	-1.05589	red
NCU05190	8.63466	up	-1.24406	red
NCU05761	4.64143	up	-1.12578	red
NCU06160	8.39347	up	-1.47662	red
NCU06895	4.08673	up	-1.43249	red
NCU07047	6.15833	up	-1.08838	red
NCU08839	2.6419	up	-1.58748	red
NCU11383	2.26961	up	-1.04793	red
NCU17064	3.96866	up	-1.08264	red
NCU03875	-2.54577	down
NCU00025	-2.06555	down	0.011	gray
NCU00054	-2.36592	down	0.01894	gray
NCU00080	-2.0143	down	-0.04109	gray
NCU00175	-5.33033	down	-0.23072	gray
NCU00176	-6.38154	down	-0.3749	gray
NCU00185	-3.99586	down	0.08261	gray
NCU00203	-2.6938	down	-0.12155	gray
NCU00229	-4.48995	down	-0.26655	gray
NCU00236	-2.05827	down	-0.37125	gray
NCU00244	-2.12485	down	-0.15195	gray
NCU00247	-2.39544	down	-0.30242	gray
NCU00248	-2.6221	down	-0.03329	gray
NCU00260	-3.47376	down	0.11994	gray
NCU00281	-2.72086	down	0.33029	gray
NCU00288	-3.7132	down	-0.18875	gray
NCU00289	-2.54266	down	-0.0533	gray
NCU00306	-4.63038	down	0.26529	gray
NCU00314	-2.36484	down	-0.0661899	gray
NCU00332	-2.35134	down	0.16358	gray
NCU00356	-2.59884	down	0.09047	gray
NCU00368	-2.42862	down	0.0682599	gray
NCU00373	-2.06534	down	-0.16043	gray
NCU00399	-8.20165	down	-0.37715	gray
NCU00401	-2.40629	down	0.13297	gray
NCU00403	-4.54187	down	0.00259	gray
NCU00450	-2.55202	down	-0.02811	gray
NCU00451	-5.9349	down	-0.08107	gray
NCU00471	-2.15082	down	-0.10542	gray
NCU00486	-2.58984	down	-0.04654	gray
NCU00515	-2.54367	down	0.09302	gray
NCU00521	-2.59631	down	-0.4697	gray
NCU00552	-5.34239	down	-0.1316	gray
NCU00559	-2.08532	down	0.0229	gray
NCU00573	-2.26635	down	0.15783	gray
NCU00582	-6.62397	down	-0.38877	gray
NCU00585	-4.87658	down	-0.03851	gray
NCU00586	-3.4338	down	-0.25326	gray
NCU00607	-10.7961	down	0.02224	gray
NCU00627	-2.25045	down	-0.08189	gray
NCU00631	-2.45433	down	0.25815	gray
NCU00642	-5.88424	down	0.03769	gray
NCU00643	-3.31955	down	-0.03865	gray
NCU00667	-2.1224	down	-0.45581	gray
NCU00684	-4.43936	down	0.01669	gray
NCU00691	-3.23268	down	0.0309	gray
NCU00694	-2.69236	down	0.02961	gray
NCU00695	-21.4461	down	0.17976	gray
NCU00701	-2.84459	down	-0.01286	gray
NCU00705	-2.69012	down	-0.05088	gray
NCU00716	-8.13224	down	-0.3198	gray
NCU00732	-4.29422	down	-0.15563	gray
NCU00748	-2.67351	down	-0.12798	gray
NCU00754	-3.21595	down	-0.23178	gray
NCU00755	-2.27324	down	0.02935	gray
NCU00757	-4.41878	down	-0.0136	gray
NCU00759	-3.68692	down	0.29664	gray
NCU00761	-4.56031	down	-0.00654003	gray
NCU00780	-2.22358	down	-0.24187	gray
NCU00788	-2.93094	down	0.24206	gray
NCU00790	-6.20416	down	0.02829	gray
NCU00795	-2.41282	down	0.07721	gray
NCU00801	-5.13372	down	0.11329	gray
NCU00813	-3.10855	down	0.10204	gray
NCU00855	-2.28518	down	-0.34527	gray
NCU00865	-3.88657	down	0.04847	gray
NCU00876	-2.48829	down	0.22368	gray
NCU00878	-2.93641	down	-0.7215	gray
NCU00893	-2.12328	down	0.11472	gray
NCU00899	-2.53327	down	0.06576	gray
NCU00939	-2.27297	down	0.09181	gray
NCU00941	-2.03656	down	0.000119996	gray
NCU00985	-4.17767	down	0.35755	gray
NCU00999	-3.14184	down	0.12073	gray
NCU01009	-2.93635	down	-0.06452	gray
NCU01010	-3.05249	down	-0.04702	gray
NCU01063	-5.14387	down	-0.03687	gray
NCU01068	-3.49355	down	-0.08645	gray
NCU01072	-2.83617	down	-0.38759	gray
NCU01080	-2.45783	down	-0.00692007	gray
NCU01089	-2.88787	down	0.25542	gray
NCU01106	-3.04459	down	-0.13184	gray
NCU01107	-2.64504	down	-0.13776	gray
NCU01124	-3.92529	down	-0.07964	gray
NCU01127	-3.8707	down	-0.53632	gray
NCU01140	-2.88434	down	0.26542	gray
NCU01162	-2.62274	down	-0.01588	gray
NCU01180	-2.42536	down	-0.28248	gray
NCU01181	-2.97052	down	-0.0613499	gray
NCU01193	-3.27201	down	0.02337	gray
NCU01210	-3.25903	down	0.21385	gray
NCU01213	-2.07193	down	-0.3079	gray
NCU01223	-2.72957	down	-0.33621	gray
NCU01233	-2.67107	down	-0.31016	gray
NCU01285	-2.72389	down	-0.04834	gray
NCU01348	-4.3833	down	0.01218	gray
NCU01349	-2.6857	down	0.08445	gray
NCU01423	-2.74713	down	-0.41437	gray
NCU01424	-2.51283	down	-0.16956	gray
NCU01425	-2.21564	down	-0.22957	gray
NCU01426	-3.51992	down	-0.15195	gray
NCU01430	-5.77192	down	0.27586	gray
NCU01432	-2.46929	down	-0.34397	gray
NCU01444	-2.08605	down	-0.12659	gray
NCU01451	-2.17134	down	-0.26609	gray
NCU01459	-2.03911	down	0.2474	gray
NCU01476	-2.20387	down	0.1146	gray
NCU01477	-2.07794	down	0.10973	gray
NCU01509	-2.50506	down	0.32163	gray
NCU01510	-2.97204	down	0.15476	gray
NCU01529	-3.03352	down	-0.1772	gray
NCU01572	-2.41159	down	0.36786	gray
NCU01581	-2.235	down	-0.1801	gray
NCU01591	-4.70919	down	0.42593	gray
NCU01608	-2.32668	down	-0.1333	gray
NCU01620	-3.63054	down	0.14973	gray
NCU01633	-2.98787	down	-0.22647	gray
NCU01640	-3.59383	down	-0.57961	gray
NCU01645	-2.71208	down	-0.04243	gray
NCU01660	-2.90395	down	-0.30741	gray
NCU01678	-3.91243	down	0.20699	gray
NCU01734	-4.09706	down	-0.10153	gray
NCU01735	-3.91117	down	-0.41201	gray
NCU01748	-2.14	down	0.04566	gray
NCU01754	-2.40757	down	-0.57725	gray
NCU01833	-2.08084	down	-0.11529	gray
NCU01837	-4.73766	down	-0.20595	gray
NCU01851	-2.29125	down	0.0718	gray
NCU01856	-2.01005	down	-0.43146	gray
NCU01861	-2.77641	down	-0.20334	gray
NCU01873	-3.01906	down	-0.32934	gray
NCU01883	-2.40945	down	-0.07981	gray
NCU01891	-2.04772	down	-0.24347	gray
NCU01898	-3.71594	down	-0.49926	gray
NCU01899	-2.46059	down	0.12604	gray
NCU01901	-2.7869	down	0.08152	gray
NCU01903	-2.87076	down	0.07971	gray
NCU01904	-2.4451	down	-0.07808	gray
NCU01905	-4.79394	down	-0.0583001	gray
NCU01906	-2.86126	down	0.15917	gray
NCU01911	-3.29955	down	0.1461	gray
NCU01989	-2.05258	down	-0.0672499	gray
NCU02051	-2.65856	down	0.21495	gray
NCU02071	-2.21139	down	0.19017	gray
NCU02074	-3.314	down	-0.0232	gray
NCU02097	-2.93782	down	-0.16585	gray
NCU02122	-3.86606	down	0.16186	gray
NCU02138	-3.89362	down	-0.00400001	gray
NCU02163	-2.87184	down	0.05184	gray
NCU02164	-2.00105	down	-0.00913	gray
NCU02175	-3.47186	down	0.0505	gray
NCU02190	-3.89397	down	-0.21388	gray
NCU02191	-4.27815	down	0.15632	gray
NCU02213	-2.17971	down	0.18487	gray
NCU02240	-2.25563	down	0.63574	gray
NCU02257	-2.79711	down	0.29572	gray
NCU02295	-2.09498	down	0.08799	gray
NCU02317	-4.13273	down	-0.4234	gray
NCU02322	-2.30988	down	-0.05101	gray
NCU02343	-3.17996	down	0.01466	gray
NCU02356	-2.34151	down	0.000949955	gray
NCU02369	-4.76695	down	-0.31836	gray
NCU02478	-2.48043	down	0.13466	gray
NCU02507	-2.14432	down	0.00335	gray
NCU02526	-2.537	down	0.11534	gray
NCU02540	-2.77135	down	-0.16915	gray
NCU02550	-2.02044	down	0.128	gray
NCU02558	-2.2312	down	0.01476	gray
NCU02603	-3.36766	down	0.10394	gray
NCU02609	-2.11236	down	0.03447	gray
NCU02651	-2.90905	down	-0.18532	gray
NCU02653	-3.3453	down	-0.00480004	gray
NCU02660	-3.49261	down	-0.13679	gray
NCU02665	-3.15365	down	-0.00145003	gray
NCU02691	-2.18748	down	0.07606	gray
NCU02712	-3.16318	down	-0.06439	gray
NCU02713	-4.2117	down	-0.43661	gray
NCU02733	-2.06982	down	-0.20983	gray
NCU02739	-2.58257	down	-0.0158	gray
NCU02798	-3.52676	down	-0.07987	gray
NCU02799	-4.47309	down	0.15486	gray
NCU02801	-2.09905	down	-0.27714	gray
NCU02819	-2.3629	down	-0.25001	gray
NCU02833	-2.0008	down	-0.000980012	gray
NCU02843	-2.12618	down	-0.1464	gray
NCU02854	-4.25066	down	-0.1225	gray
NCU02875	-2.74945	down	-0.10357	gray
NCU02883	-4.41884	down	-0.26339	gray
NCU02903	-3.28147	down	-0.13423	gray
NCU02904	-3.99618	down	-0.05986	gray
NCU02906	-2.38439	down	-0.02185	gray
NCU02919	-6.35335	down	-0.19324	gray
NCU02932	-3.86356	down	-0.19794	gray
NCU02945	-2.54284	down	-0.27358	gray
NCU02946	-2.1977	down	-9.99712e-05	gray
NCU02975	-2.33778	down	-0.0616599	gray
NCU02976	-2.4671	down	0.39184	gray
NCU03064	-2.07543	down	0.08737	gray
NCU03098	-2.52321	down	-0.12221	gray
NCU03141	-2.18836	down	0.19157	gray
NCU03184	-2.51094	down	-0.37609	gray
NCU03205	-2.10283	down	-0.19239	gray
NCU03208	-3.36305	down	0.02227	gray
NCU03220	-2.02897	down	-0.07152	gray
NCU03222	-3.88132	down	-0.30242	gray
NCU03271	-2.27321	down	-0.03279	gray
NCU03275	-3.343	down	-0.20128	gray
NCU03281	-2.16825	down	-0.36558	gray
NCU03370	-2.33913	down	-0.14587	gray
NCU03374	-2.68264	down	-0.24816	gray
NCU03383	-2.73309	down	0.02225	gray
NCU03388	-5.51106	down	-0.15945	gray
NCU03403	-3.60379	down	0.0306	gray
NCU03404	-2.59264	down	-0.0939	gray
NCU03426	-2.70141	down	0.14923	gray
NCU03583	-2.97516	down	-0.16369	gray
NCU03601	-2.00368	down	-0.18913	gray
NCU03617	-3.02946	down	0.00983004	gray
NCU03641	-3.86843	down	0.05839	gray
NCU03646	-5.27697	down	0.09543	gray
NCU03647	-2.8332	down	0.37729	gray
NCU03648	-2.90692	down	0.43079	gray
NCU03651	-4.88367	down	-0.23579	gray
NCU03654	-2.23472	down	0.00240995	gray
NCU03660	-3.03723	down	0.00676001	gray
NCU03686	-4.28664	down	0.10973	gray
NCU03697	-2.40553	down	-0.16118	gray
NCU03699	-2.55256	down	0.02331	gray
NCU03707	-2.36596	down	-0.26836	gray
NCU03736	-2.19229	down	-0.06907	gray
NCU03755	-2.61376	down	-0.00401999	gray
NCU03771	-5.37076	down	0.2404	gray
NCU03773	-3.72121	down	-0.30047	gray
NCU03803	-3.13761	down	-0.05754	gray
NCU03805	-2.26214	down	-0.21057	gray
NCU03819	-2.09255	down	0.05505	gray
NCU03868	-2.78447	down	0.372	gray
NCU03879	-4.49508	down	-0.16831	gray
NCU03918	-2.33708	down	-0.16553	gray
NCU03921	-2.39595	down	0.42174	gray
NCU03931	-2.94358	down	-0.05812	gray
NCU03940	-4.69159	down	0.05601	gray
NCU03966	-2.119	down	-0.14878	gray
NCU03967	-4.21058	down	-0.31221	gray
NCU04042	-2.82073	down	0.45463	gray
NCU04052	-2.47305	down	-0.28655	gray
NCU04065	-2.73554	down	-0.03807	gray
NCU04066	-3.7937	down	0.1688	gray
NCU04133	-2.06413	down	0.01714	gray
NCU04144	-2.87653	down	-0.0785101	gray
NCU04179	-2.19855	down	0.12241	gray
NCU04197	-3.44181	down	0.0517401	gray
NCU04205	-4.70958	down	0.15659	gray
NCU04211	-2.83388	down	-0.01889	gray
NCU04223	-2.27852	down	0.08104	gray
NCU04224	-2.30581	down	0.17741	gray
NCU04226	-4.26156	down	-0.14957	gray
NCU04262	-2.67218	down	0.05186	gray
NCU04265	-4.40973	down	-0.02409	gray
NCU04266	-2.29153	down	-0.52605	gray
NCU04268	-3.13989	down	0.12414	gray
NCU04269	-2.83696	down	0.03294	gray
NCU04283	-2.95123	down	-0.50518	gray
NCU04284	-3.21377	down	-0.4425	gray
NCU04295	-3.25839	down	0.09199	gray
NCU04314	-3.15743	down	-0.46401	gray
NCU04343	-4.49865	down	-0.23642	gray
NCU04350	-2.53912	down	0.20759	gray
NCU04352	-2.80786	down	-0.06288	gray
NCU04383	-2.36956	down	0.06268	gray
NCU04416	-2.70578	down	-0.03036	gray
NCU04421	-2.50105	down	-0.10664	gray
NCU04424	-3.05213	down	0.04384	gray
NCU04430	-3.42096	down	0.02576	gray
NCU04431	-2.64637	down	-0.19125	gray
NCU04433	-2.01832	down	0.04446	gray
NCU04435	-2.29203	down	0.16266	gray
NCU04442	-2.84921	down	-0.0192	gray
NCU04444	-3.11711	down	0.0525199	gray
NCU04450	-2.13062	down	0.0843001	gray
NCU04451	-6.41765	down	0.05179	gray
NCU04452	-2.02152	down	-0.04791	gray
NCU04480	-3.60103	down	-0.08103	gray
NCU04493	-3.18246	down	-0.02867	gray
NCU04506	-2.37434	down	0.10554	gray
NCU04526	-5.25056	down	-0.26536	gray
NCU04554	-2.81349	down	-0.10468	gray
NCU04591	-4.59992	down	0.13212	gray
NCU04605	-2.66956	down	-0.04014	gray
NCU04632	-2.33517	down	0.00314001	gray
NCU04639	-4.08372	down	-0.22895	gray
NCU04669	-3.44965	down	0.1089	gray
NCU04670	-2.08781	down	0.20485	gray
NCU04675	-2.24428	down	-0.2272	gray
NCU04720	-2.32914	down	-0.78277	gray
NCU04723	-5.27576	down	-0.35689	gray
NCU04751	-4.61074	down	0.06617	gray
NCU04816	-2.23344	down	-0.19958	gray
NCU04818	-3.21086	down	-0.19886	gray
NCU04819	-2.95413	down	-0.16735	gray
NCU04844	-2.31393	down	-0.05235	gray
NCU04930	-2.23761	down	-0.29038	gray
NCU04931	-2.90244	down	-0.48592	gray
NCU04963	-4.72157	down	-0.59548	gray
NCU04983	-2.01272	down	-0.18114	gray
NCU05068	-2.22714	down	-0.01033	gray
NCU05122	-4.16028	down	-0.49169	gray
NCU05126	-2.27243	down	-0.47991	gray
NCU05134	-3.69572	down	0.11811	gray
NCU05135	-2.06176	down	-0.14093	gray
NCU05136	-2.27398	down	-0.0393799	gray
NCU05137	-3.51807	down	-0.26329	gray
NCU05143	-2.70595	down	-0.08951	gray
NCU05146	-2.7872	down	-0.23889	gray
NCU05148	-2.44035	down	-0.45954	gray
NCU05149	-2.50817	down	-0.63655	gray
NCU05193	-3.05094	down	0.41671	gray
NCU05229	-2.48085	down	-0.0218	gray
NCU05243	-2.30278	down	0.06794	gray
NCU05291	-3.67063	down	-0.1843	gray
NCU05309	-3.00346	down	-0.42117	gray
NCU05311	-3.36067	down	-0.28128	gray
NCU05315	-2.67797	down	0.05942	gray
NCU05340	-3.91922	down	-0.06173	gray
NCU05350	-2.42341	down	-0.31149	gray
NCU05384	-3.17374	down	-0.11331	gray
NCU05394	-3.98369	down	-0.18838	gray
NCU05395	-4.29758	down	-0.5663	gray
NCU05401	-2.16304	down	-0.32141	gray
NCU05417	-2.33543	down	0.37546	gray
NCU05448	-2.8046	down	-0.25481	gray
NCU05490	-2.19917	down	-0.26171	gray
NCU05498	-3.82786	down	-0.71423	gray
NCU05507	-2.78839	down	0.17665	gray
NCU05524	-3.60148	down	-0.14533	gray
NCU05527	-2.11873	down	0.00770998	gray
NCU05534	-5.70103	down	-0.21845	gray
NCU05546	-2.17899	down	0.28686	gray
NCU05568	-3.46047	down	-0.21296	gray
NCU05595	-4.43306	down	0.027	gray
NCU05597	-3.58092	down	0.13688	gray
NCU05598	-5.15651	down	0.17883	gray
NCU05626	-2.37474	down	-0.21093	gray
NCU05627	-4.07871	down	0.01368	gray
NCU05631	-3.15986	down	0.12796	gray
NCU05637	-2.42239	down	0.01848	gray
NCU05638	-2.54329	down	0.00355001	gray
NCU05639	-4.236	down	0.04428	gray
NCU05652	-3.08809	down	-0.75812	gray
NCU05667	-2.85906	down	0.03872	gray
NCU05686	-2.94765	down	0.59755	gray
NCU05721	-3.60585	down	0.63382	gray
NCU05728	-2.32858	down	-0.03556	gray
NCU05766	-3.41735	down	-0.30238	gray
NCU05770	-2.61516	down	-0.2528	gray
NCU05775	-2.05997	down	0.15926	gray
NCU05838	-2.59115	down	0.34545	gray
NCU05840	-2.40742	down	0.77353	gray
NCU05841	-2.57725	down	0.67214	gray
NCU05844	-4.9093	down	0.53257	gray
NCU05854	-3.12455	down	0.99354	gray
NCU05855	-3.7323	down	0.8296	gray
NCU05860	-6.66421	down	0.45677	gray
NCU05864	-2.08635	down	0.77302	gray
NCU05873	-2.26259	down	0.93894	gray
NCU05881	-2.91176	down	0.57075	gray
NCU05931	-2.40907	down	-0.1001	gray
NCU05964	-4.84696	down	0.49822	gray
NCU06042	-3.15138	down	-0.0230701	gray
NCU06045	-4.83237	down	0.25732	gray
NCU06046	-5.02741	down	-0.08474	gray
NCU06121	-2.12261	down	-0.15331	gray
NCU06123	-3.88835	down	-0.12282	gray
NCU06125	-3.45265	down	-0.06404	gray
NCU06131	-2.44914	down	-0.19936	gray
NCU06132	-3.03947	down	-0.09715	gray
NCU06137	-3.63502	down	0.06812	gray
NCU06148	-2.81344	down	-0.17821	gray
NCU06174	-2.0261	down	0.1954	gray
NCU06207	-2.42689	down	-0.33214	gray
NCU06220	-2.0288	down	-0.14722	gray
NCU06265	-2.19465	down	-0.30661	gray
NCU06305	-6.77625	down	-0.16688	gray
NCU06306	-4.25331	down	-0.06976	gray
NCU06312	-2.89804	down	0.21779	gray
NCU06375	-2.30235	down	0.32807	gray
NCU06419	-2.4668	down	-0.13441	gray
NCU06427	-7.30251	down	0.02003	gray
NCU06465	-2.85047	down	-0.08776	gray
NCU06483	-2.20952	down	-0.20935	gray
NCU06518	-2.47546	down	-0.44486	gray
NCU06524	-5.22681	down	-0.18315	gray
NCU06589	-2.1332	down	-0.0508699	gray
NCU06597	-2.98119	down	-0.20732	gray
NCU06603	-2.19587	down	-0.06956	gray
NCU06655	-4.23753	down	-0.46011	gray
NCU06669	-2.35269	down	-0.1789	gray
NCU06681	-3.28776	down	-0.0233	gray
NCU06682	-3.88693	down	-0.39101	gray
NCU06719	-3.5632	down	-0.42797	gray
NCU06751	-2.46673	down	-0.06466	gray
NCU06765	-2.35027	down	0.03784	gray
NCU06773	-2.81657	down	0.13457	gray
NCU06803	-2.1144	down	0.04979	gray
NCU06815	-2.03951	down	-0.42616	gray
NCU06833	-2.14288	down	-0.14827	gray
NCU06847	-4.0482	down	0.18481	gray
NCU06861	-2.21428	down	0.02341	gray
NCU06910	-2.1857	down	-0.29011	gray
NCU06915	-5.52862	down	0.22123	gray
NCU06931	-2.28723	down	0.28047	gray
NCU06940	-3.7583	down	-0.09325	gray
NCU06961	-2.88127	down	0.13541	gray
NCU06969	-3.28535	down	0.21226	gray
NCU06973	-4.95775	down	-0.06136	gray
NCU06977	-3.10891	down	-0.31016	gray
NCU06989	-3.39195	down	0.0541199	gray
NCU07027	-2.9681	down	-0.34992	gray
NCU07033	-4.36895	down	-0.06765	gray
NCU07034	-2.30766	down	-0.17401	gray
NCU07061	-4.70467	down	-0.2656	gray
NCU07064	-2.75376	down	-0.4007	gray
NCU07073	-2.06333	down	-0.70794	gray
NCU07075	-3.07722	down	-0.35453	gray
NCU07079	-2.41455	down	-0.27118	gray
NCU07117	-2.51337	down	0.14755	gray
NCU07221	-3.34936	down	0.63758	gray
NCU07233	-2.7916	down	0.82029	gray
NCU07257	-3.50879	down	-0.60751	gray
NCU07258	-2.58691	down	0.03719	gray
NCU07267	-3.20782	down	0.22133	gray
NCU07277	-3.76755	down	0.15351	gray
NCU07287	-3.03817	down	-0.04148	gray
NCU07310	-2.22334	down	-0.62165	gray
NCU07322	-2.16233	down	0.1072	gray
NCU07332	-2.97256	down	0.22752	gray
NCU07333	-2.25075	down	0.20628	gray
NCU07340	-2.66279	down	0.30355	gray
NCU07344	-2.32851	down	0.15405	gray
NCU07349	-2.32922	down	-0.25329	gray
NCU07351	-3.25449	down	0.0149	gray
NCU07359	-2.75453	down	-0.05563	gray
NCU07415	-3.20886	down	-0.0640001	gray
NCU07425	-2.80813	down	-0.12221	gray
NCU07454	-3.29509	down	-0.1153	gray
NCU07473	-2.05713	down	0.16424	gray
NCU07491	-2.22714	down	0.0361	gray
NCU07540	-3.19783	down	-0.11511	gray
NCU07564	-2.40744	down	0.18193	gray
NCU07569	-6.9713	down	-0.10487	gray
NCU07661	-3.39584	down	-0.27879	gray
NCU07694	-2.02023	down	0.09162	gray
NCU07695	-2.1959	down	0.02701	gray
NCU07723	-2.30487	down	0.18246	gray
NCU07730	-2.5653	down	-0.00169	gray
NCU07736	-3.84192	down	0.11831	gray
NCU07737	-3.42817	down	0.07606	gray
NCU07769	-3.65291	down	0.30816	gray
NCU07787	-6.91068	down	-0.2369	gray
NCU07806	-2.83089	down	-0.21908	gray
NCU07816	-3.48121	down	0.08231	gray
NCU07817	-5.57874	down	-0.2597	gray
NCU07818	-4.52261	down	0.38751	gray
NCU07834	-2.88211	down	0.20032	gray
NCU07837	-2.7	down	-0.01354	gray
NCU07840	-2.19387	down	0.23761	gray
NCU07881	-2.4283	down	0.13206	gray
NCU07888	-4.33704	down	-0.19559	gray
NCU07910	-2.11989	down	0.21201	gray
NCU07915	-2.15345	down	-0.27636	gray
NCU07916	-2.2942	down	-0.24207	gray
NCU07921	-2.38614	down	-0.12709	gray
NCU07934	-2.52932	down	0.28468	gray
NCU07938	-2.74774	down	0.04561	gray
NCU07946	-2.95064	down	-0.27696	gray
NCU07949	-2.32292	down	-0.14697	gray
NCU07951	-2.35737	down	-0.3178	gray
NCU07971	-3.19798	down	-0.08067	gray
NCU08013	-3.48011	down	-0.29546	gray
NCU08017	-2.42856	down	-0.04731	gray
NCU08070	-2.691	down	0.12496	gray
NCU08092	-3.46963	down	-0.32394	gray
NCU08159	-2.00796	down	-0.16261	gray
NCU08166	-2.55677	down	-0.23273	gray
NCU08167	-2.78951	down	0.02213	gray
NCU08168	-3.45069	down	-0.31955	gray
NCU08170	-2.93599	down	-0.24282	gray
NCU08171	-2.07885	down	-0.25337	gray
NCU08173	-4.67874	down	0.12899	gray
NCU08270	-3.07883	down	-0.08935	gray
NCU08288	-2.75738	down	-0.3141	gray
NCU08308	-5.19901	down	-0.35552	gray
NCU08319	-2.09665	down	0.08982	gray
NCU08330	-3.63501	down	-0.20907	gray
NCU08331	-2.44657	down	-0.23013	gray
NCU08334	-2.07815	down	0.11349	gray
NCU08378	-3.78422	down	0.74957	gray
NCU08391	-2.87304	down	-0.04719	gray
NCU08398	-2.42724	down	-0.15234	gray
NCU08412	-2.39645	down	0.14439	gray
NCU08413	-4.35273	down	0.31027	gray
NCU08414	-2.19349	down	0.05944	gray
NCU08438	-4.929	down	-0.60175	gray
NCU08487	-4.61167	down	0.29512	gray
NCU08564	-2.38642	down	-0.07302	gray
NCU08606	-2.55783	down	0.00803997	gray
NCU08610	-3.25479	down	0.56903	gray
NCU08621	-2.20409	down	0.20002	gray
NCU08643	-4.96281	down	0.39074	gray
NCU08644	-4.33008	down	-0.08708	gray
NCU08677	-2.2061	down	-0.44099	gray
NCU08695	-2.98222	down	-0.24874	gray
NCU08696	-2.45386	down	0.64801	gray
NCU08699	-5.97057	down	0.03702	gray
NCU08701	-2.22419	down	0.29402	gray
NCU08703	-2.02389	down	0.73527	gray
NCU08709	-3.29301	down	0.33463	gray
NCU08715	-2.12686	down	0.16301	gray
NCU08719	-2.15924	down	-0.02093	gray
NCU08720	-7.55894	down	-0.36638	gray
NCU08726	-3.40453	down	0.04608	gray
NCU08727	-4.61183	down	-0.20558	gray
NCU08738	-3.76451	down	0.20056	gray
NCU08739	-3.28569	down	0.06152	gray
NCU08742	-2.31786	down	-0.24446	gray
NCU08747	-4.94154	down	0.10764	gray
NCU08750	-4.78767	down	0.34624	gray
NCU08806	-2.55372	down	-0.27576	gray
NCU08807	-2.02823	down	-0.31143	gray
NCU08820	-2.77624	down	-0.42515	gray
NCU08842	-3.08872	down	0.02702	gray
NCU08850	-3.31317	down	-0.0393	gray
NCU08851	-2.1754	down	-0.04484	gray
NCU08891	-2.19789	down	0.15377	gray
NCU08892	-2.05138	down	-0.0842901	gray
NCU08909	-3.15588	down	-0.69831	gray
NCU08936	-2.10145	down	-0.10497	gray
NCU08967	-2.23114	down	0.36679	gray
NCU09010	-3.2263	down	-0.25058	gray
NCU09023	-2.88957	down	-0.75241	gray
NCU09024	-4.07612	down	-0.20713	gray
NCU09041	-2.24685	down	-0.3047	gray
NCU09043	-2.10814	down	-0.5859	gray
NCU09066	-2.16391	down	-0.32954	gray
NCU09075	-2.41858	down	0.16604	gray
NCU09078	-2.32208	down	-0.0858201	gray
NCU09097	-2.67263	down	-0.04336	gray
NCU09108	-3.19567	down	0.03719	gray
NCU09160	-3.56371	down	0.77986	gray
NCU09174	-3.82645	down	0.17722	gray
NCU09211	-3.98113	down	0.13336	gray
NCU09235	-6.76004	down	-0.10296	gray
NCU09253	-2.08481	down	0.20372	gray
NCU09261	-3.01425	down	0.0849001	gray
NCU09262	-3.85196	down	0.28282	gray
NCU09263	-4.54731	down	0.06098	gray
NCU09267	-3.52719	down	0.03432	gray
NCU09268	-2.12149	down	-0.16549	gray
NCU09285	-3.55348	down	0.6461	gray
NCU09325	-2.24484	down	0.01706	gray
NCU09335	-3.03717	down	-0.17155	gray
NCU09400	-2.49067	down	0.07752	gray
NCU09420	-2.83497	down	0.06711	gray
NCU09532	-2.26442	down	0.03735	gray
NCU09535	-2.46348	down	-0.0317699	gray
NCU09559	-5.98269	down	0.66751	gray
NCU09567	-3.27953	down	0.43196	gray
NCU09686	-2.23212	down	0.39821	gray
NCU09702	-5.16734	down	0.028	gray
NCU09713	-2.00227	down	-0.1889	gray
NCU09714	-6.7598	down	-0.22069	gray
NCU09754	-2.09051	down	0.48681	gray
NCU09759	-3.07828	down	0.93405	gray
NCU09761	-3.45581	down	0.62669	gray
NCU09762	-3.54081	down	0.89893	gray
NCU09772	-2.16454	down	0.37244	gray
NCU09773	-3.82526	down	0.39733	gray
NCU09775	-9.18085	down	0.64064	gray
NCU09776	-5.17852	down	0.46587	gray
NCU09777	-2.06695	down	0.81832	gray
NCU09810	-3.25407	down	0.19949	gray
NCU09820	-3.10486	down	-0.05588	gray
NCU09823	-2.86362	down	-0.12039	gray
NCU09830	-3.11831	down	-0.23367	gray
NCU09873	-2.72473	down	-0.08246	gray
NCU09886	-2.35789	down	-0.3895	gray
NCU09976	-2.9033	down	0.12156	gray
NCU10011	-2.59281	down	-0.10108	gray
NCU10051	-3.0485	down	0.31914	gray
NCU10063	-3.39684	down	0.23403	gray
NCU10069	-2.03336	down	-0.17113	gray
NCU10091	-2.05946	down	-0.0141399	gray
NCU10237	-2.53728	down	-0.33093	gray
NCU10359	-2.20052	down	0.19528	gray
NCU10400	-2.0268	down	-0.13409	gray
NCU10429	-4.78825	down	-0.18962	gray
NCU10500	-4.32046	down	-0.23207	gray
NCU10506	-2.55534	down	-0.11413	gray
NCU10529	-2.26403	down	0.12207	gray
NCU10570	-2.28911	down	-0.21499	gray
NCU10603	-3.46078	down	-0.21267	gray
NCU10703	-4.34745	down	0.51017	gray
NCU10732	-2.07022	down	0.2018	gray
NCU10809	-2.0744	down	0.61204	gray
NCU10852	-3.8077	down	0.00628	gray
NCU10865	-7.07206	down	-0.06439	gray
NCU10895	-6.22207	down	-0.24146	gray
NCU11067	-2.13789	down	-0.33134	gray
NCU11200	-3.47621	down	0.21019	gray
NCU11260	-3.27259	down	-0.20583	gray
NCU11324	-3.18964	down	0.28285	gray
NCU11352	-3.02236	down	0.09479	gray
NCU11395	-3.60348	down	-0.3387	gray
NCU11417	-4.07348	down	0.85395	gray
NCU12033	-2.1858	down	-0.10876	gray
NCU15831	-2.23078	down	-0.10374	gray
NCU15833	-2.36869	down	0.52178	gray
NCU15834	-3.09405	down	-0.13917	gray
NCU16325	-2.40921	down	-0.57278	gray
NCU16343	-2.07133	down	-0.19569	gray
NCU16347	-2.17045	down	-0.20626	gray
NCU16348	-2.68944	down	-0.45231	gray
NCU16374	-2.04363	down	-0.3182	gray
NCU16442	-6.64884	down	-0.20652	gray
NCU16443	-2.33435	down	0.34702	gray
NCU16445	-5.37078	down	-0.35802	gray
NCU16454	-2.4525	down	-0.11609	gray
NCU16597	-2.22202	down	-0.04	gray
NCU16623	-3.93732	down	0.06891	gray
NCU16625	-3.64476	down	-0.23686	gray
NCU16661	-3.57322	down	-0.1377	gray
NCU16664	-3.8988	down	-0.28577	gray
NCU16683	-2.63806	down	0.04352	gray
NCU16688	-3.94596	down	-0.11172	gray
NCU16699	-3.65981	down	-0.12849	gray
NCU16713	-2.7778	down	0.05269	gray
NCU16755	-3.10857	down	-0.11124	gray
NCU16776	-2.41692	down	-0.04024	gray
NCU16819	-2.01016	down	-0.1153	gray
NCU16834	-3.88027	down	-0.47027	gray
NCU16848	-2.24803	down	-0.47144	gray
NCU16852	-3.39541	down	-0.39952	gray
NCU16854	-2.15705	down	-0.02242	gray
NCU16875	-3.03417	down	-0.80507	gray
NCU16997	-3.63777	down	-0.14855	gray
NCU16999	-2.52151	down	-0.13041	gray
NCU17069	-2.01221	down	-0.27022	gray
NCU01926	-2.17971	down	2.80262	green
NCU05005	-3.20424	down	1.61453	green
NCU05161	-4.45407	down	1.21548	green
NCU05162	-2.36179	down	2.00018	green
NCU05668	-2.15732	down	1.25216	green
NCU05842	-2.5806	down	1.1551	green
NCU05882	-3.60395	down	1.33943	green
NCU05884	-2.29599	down	1.49402	green
[truncated: 7,587 more rows]

## Sheet: acf1
gene	RNAseq.log2fc	RNAseq.category	H3K27me.log2fc	H3K27me.category			H3K27me genes
NCU04702	3.81035	up	-0.56674	gray			NCU02196
NCU04703	4.36403	up	-0.59284	gray			NCU02867
NCU04860	5.89929	up	0.30598	gray			NCU03469
NCU04867	3.02951	up	0.02063	gray			NCU03470
NCU05071	2.5228	up	0.30085	gray			NCU03472
NCU05081	2.12576	up	0.48826	gray			NCU03473
NCU05083	2.18077	up	0.16731	gray			NCU03474
NCU05097	3.10906	up	-0.01491	gray			NCU03475
NCU05106	3.24446	up	-0.06324	gray			NCU03476
NCU05176	3.16945	up	0.08787	gray			NCU03581
NCU05184	2.37306	up	-0.1567	gray			NCU03582
NCU05658	2.53099	up	0.32	gray			NCU04689
NCU05903	2.24841	up	0.1384	gray			NCU04690
NCU05912	4.26468	up	-0.70008	gray			NCU04691
NCU06155	2.2485	up	-0.75684	gray			NCU04694
NCU06159	3.08535	up	-0.64227	gray			NCU04695
NCU06163	2.62689	up	-0.59065	gray			NCU04697
NCU06164	5.54026	up	-0.56934	gray			NCU04700
NCU06165	2.20324	up	-0.50881	gray			NCU04701
NCU06953	3.83478	up	-0.19132	gray			NCU04702
NCU07150	5.03181	up	0.56726	gray			NCU04703
NCU07152	4.67146	up	-0.0915	gray			NCU04704
NCU07228	2.37628	up	0.12127	gray			NCU04705
NCU07249	3.20349	up	0.1778	gray			NCU04706
NCU07596	2.31418	up	-0.00386	gray			NCU04707
NCU07597	2.31771	up	-0.03343	gray			NCU04708
NCU07624	2.8703	up	-0.93316	gray			NCU04709
NCU08087	4.20904	up	0.1221	gray			NCU04710
NCU08089	4.41881	up	-0.12418	gray			NCU04722
NCU08186	2.05136	up	-0.36929	gray			NCU04852
NCU08222	4.75339	up	0.17144	gray			NCU04853
NCU08223	2.54508	up	-0.05458	gray			NCU04860
NCU08522	2.46012	up	-0.95569	gray			NCU04862
NCU08530	6.76959	up	-0.59429	gray			NCU04865
NCU08531	4.49734	up	-0.00722	gray			NCU04867
NCU08539	4.17073	up	0.04746	gray			NCU04869
NCU08543	4.21539	up	0.027	gray			NCU04870
NCU08570	2.35938	up	-0.14639	gray			NCU04871
NCU08630	2.26539	up	0.30188	gray			NCU04874
NCU08756	3.52208	up	0.39108	gray			NCU04875
NCU08796	7.15216	up	0.21146	gray			NCU04876
NCU09147	5.5955	up	-0.32457	gray			NCU04877
NCU09165	5.07859	up	0.49129	gray			NCU04879
NCU09304	2.81745	up	0.19763	gray			NCU04881
NCU09306	3.08574	up	0.05098	gray			NCU04882
NCU09506	2.59763	up	-0.53861	gray			NCU04883
NCU09590	3.46173	up	-0.31728	gray			NCU04884
NCU09603	3.18295	up	-0.52481	gray			NCU04886
NCU09604	5.86012	up	-0.70735	gray			NCU04887
NCU09605	5.75926	up	-0.55335	gray			NCU04888
NCU09633	5.33012	up	-0.95744	gray			NCU04889
NCU09634	4.88841	up	0.26491	gray			NCU04890
NCU09650	2.3148	up	0.16835	gray			NCU04891
NCU09855	6.41988	up	-0.31891	gray			NCU04892
NCU09953	2.80805	up	0.10989	gray			NCU04893
NCU09990	2.6057	up	-0.98278	gray			NCU04894
NCU11365	4.16772	up	-0.44392	gray			NCU04896
NCU11405	3.00177	up	0.16905	gray			NCU04897
NCU12050	2.338	up	-0.98426	gray			NCU04900
NCU12051	2.72245	up	-0.68461	gray			NCU04901
NCU12069	2.86871	up	-0.08576	gray			NCU04903
NCU16738	2.22453	up	0.2471	gray			NCU04908
NCU17042	3.54932	up	-0.05567	gray			NCU04910
NCU17053	4.69664	up	-0.26628	gray			NCU04911
NCU17202	5.15231	up	-0.94209	gray			NCU04912
NCU03474	2.96896	up	-1.4507	red			NCU04914
NCU03476	2.92512	up	-1.3808	red			NCU04915
NCU04694	2.38087	up	-1.78495	red			NCU04916
NCU04697	3.6551	up	-1.36244	red			NCU04917
NCU04710	3.44462	up	-1.17742	red			NCU04918
NCU05186	3.10314	up	-1.03893	red			NCU04919
NCU06902	7.6992	up	-1.18553	red			NCU04920
NCU06905	5.37285	up	-1.25049	red			NCU04922
NCU07054	2.80625	up	-1.00176	red			NCU04923
NCU07091	5.49843	up	-1.63444	red			NCU04926
NCU07623	2.51781	up	-1.46738	red			NCU04928
NCU08085	4.18315	up	-1.18247	red			NCU04934
NCU08523	2.98529	up	-1.36976	red			NCU04935
NCU08830	4.22505	up	-2.07692	red			NCU04937
NCU08832	3.26231	up	-1.85504	red			NCU04938
NCU08834	4.04973	up	-1.98652	red			NCU04947
NCU08835	5.69298	up	-1.92278	red			NCU04948
NCU08837	3.45536	up	-1.77828	red			NCU04949
NCU08838	4.73546	up	-1.49958	red			NCU04950
NCU09939	2.82463	up	-1.17808	red			NCU04951
NCU12067	2.18883	up	-1.16314	red			NCU04991
NCU12068	2.34168	up	-1.02099	red			NCU04992
NCU12075	3.78814	up	-1.53232	red			NCU04994
NCU16876	5.09048	up	-2.00448	red			NCU04997
NCU02196	-2.9569	down	-0.84272	gray			NCU04998
NCU04722	-3.46178	down	-0.48102	gray			NCU05000
NCU04871	-2.75967	down	0.21842	gray			NCU05004
NCU04912	-2.44608	down	-0.53747	gray			NCU05017
NCU04914	-4.22217	down	-0.12944	gray			NCU05018
NCU04928	-2.95096	down	-0.31909	gray			NCU05048
NCU04950	-3.16	down	-0.38761	gray			NCU05049
NCU04998	-3.29	down	0.2235	gray			NCU05055
NCU05070	-3.86226	down	-0.04952	gray			NCU05056
NCU05078	-2.20283	down	0.26934	gray			NCU05057
NCU05084	-2.66196	down	0.2363	gray			NCU05058
NCU05154	-2.33289	down	-0.60162	gray			NCU05059
NCU05669	-3.78981	down	0.32111	gray			NCU05060
NCU05670	-7.1323	down	0.17157	gray			NCU05061
NCU05897	-5.35424	down	0.17148	gray			NCU05063
NCU05899	-2.26963	down	0.22576	gray			NCU05069
NCU07050	-2.38954	down	-0.57904	gray			NCU05070
NCU07094	-5.7214	down	-0.43012	gray			NCU05071
NCU07124	-5.4469	down	-0.04014	gray			NCU05073
NCU07138	-3.2502	down	-0.08168	gray			NCU05074
NCU07222	-2.97163	down	-0.04054	gray			NCU05078
NCU07231	-2.54742	down	0.40673	gray			NCU05079
NCU07232	-8.93519	down	0.18441	gray			NCU05080
NCU07234	-2.61419	down	0.25638	gray			NCU05081
NCU07237	-2.8766	down	-0.07823	gray			NCU05082
NCU08232	-2.13424	down	-0.28531	gray			NCU05083
NCU08544	-3.26005	down	0.11957	gray			NCU05084
NCU08545	-2.08467	down	0.03131	gray			NCU05085
NCU08557	-2.29821	down	-0.42277	gray			NCU05086
NCU08558	-4.84481	down	0.40325	gray			NCU05089
NCU08640	-5.10148	down	0.24001	gray			NCU05091
NCU08641	-2.95704	down	0.46731	gray			NCU05092
NCU08770	-2.42946	down	-0.45448	gray			NCU05093
NCU08784	-3.91895	down	0.43227	gray			NCU05094
NCU08907	-8.63275	down	-0.44116	gray			NCU05096
NCU09169	-3.26425	down	0.36785	gray			NCU05097
NCU09170	-6.23254	down	0.66571	gray			NCU05098
NCU09181	-6.10114	down	0.28438	gray			NCU05099
NCU09182	-4.01331	down	0.73398	gray			NCU05100
NCU09183	-4.98514	down	0.78665	gray			NCU05101
NCU09523	-2.27296	down	0.27506	gray			NCU05102
NCU09619	-4.38135	down	0.04781	gray			NCU05104
NCU09641	-2.14618	down	0.08523	gray			NCU05105
NCU09651	-2.43349	down	0.27713	gray			NCU05106
NCU09906	-5.23685	down	0.80838	gray			NCU05107
NCU09957	-4.41484	down	0.29964	gray			NCU05108
NCU09958	-2.41238	down	0.44272	gray			NCU05110
NCU09964	-8.29484	down	0.28339	gray			NCU05111
NCU10031	-3.39846	down	0.08195	gray			NCU05112
NCU10572	-2.93953	down	-0.04685	gray			NCU05113
NCU11088	-2.13608	down	-0.50384	gray			NCU05114
NCU11291	-3.41249	down	0.15783	gray			NCU05131
NCU11424	-2.23815	down	-0.07656	gray			NCU05154
NCU16930	-3.6276	down	0.03938	gray			NCU05155
NCU09904	-6.4831	down	1.03893	green			NCU05156
NCU06420	-2.8176	down	-1.02261	red			NCU05157
NCU07049	-2.484	down	-1.0305	red			NCU05158
NCU02867	-0.0162786		-0.32543	gray			NCU05159
NCU03470	-2.65461		-0.99645	gray			NCU05160
NCU03581	-0.75054		-0.02894	gray			NCU05163
NCU03582	0.664679		-0.25223	gray			NCU05164
NCU04701	-0.824541		-0.84755	gray			NCU05165
NCU04704	-0.750557		-0.90653	gray			NCU05170
NCU04705	1.12873		-0.59251	gray			NCU05171
NCU04706	0.0311739		-0.24991	gray			NCU05172
NCU04707	3.15902		-0.24721	gray			NCU05173
NCU04708	-1.39832		-0.43087	gray			NCU05175
NCU04709	-1.19378		-0.00998	gray			NCU05176
NCU04852	-1.92345		0.03378	gray			NCU05177
NCU04853	-0.676342		-0.40137	gray			NCU05178
NCU04862	-0.13076		-0.24308	gray			NCU05179
NCU04865	1.18839		-0.23518	gray			NCU05183
NCU04869	0		0.40598	gray			NCU05184
NCU04870	-3.51344		0.49039	gray			NCU05186
NCU04874	-1.33682		0.41677	gray			NCU05187
NCU04875	-0.75054		0.33246	gray			NCU05189
NCU04876	0		0.40138	gray			NCU05191
NCU04877	-2.51289		0.55153	gray			NCU05321
NCU04879	1.3536		0.62263	gray			NCU05462
NCU04881	-0.27868		-0.04965	gray			NCU05463
NCU04882	-0.016267		0.00561	gray			NCU05466
NCU04883	0.668733		-0.33385	gray			NCU05467
NCU04884	0.803348		-0.46311	gray			NCU05469
NCU04886	0.516252		-0.88201	gray			NCU05470
NCU04888	-1.43132		-0.20011	gray			NCU05479
NCU04889	-3.64414		0.28846	gray			NCU05655
NCU04890	-4.4744		0.36687	gray			NCU05656
NCU04891	-2.38573		0.24894	gray			NCU05657
NCU04892	-0.450661		0.05812	gray			NCU05658
NCU04894	-1.29089		0.31811	gray			NCU05659
NCU04896	1.567		-0.20324	gray			NCU05660
NCU04897	1.98508		-0.596	gray			NCU05661
NCU04900	-1.85525		-0.61349	gray			NCU05662
NCU04901	0.280394		-0.21702	gray			NCU05663
NCU04903	1.36829		-0.48438	gray			NCU05666
NCU04908	0.217143		-0.97507	gray			NCU05669
NCU04910	0.257118		-0.5622	gray			NCU05670
NCU04911	-0.131674		0.15871	gray			NCU05671
NCU04915	-1.92697		0.15403	gray			NCU05673
NCU04916	-1.18459		0.37841	gray			NCU05674
NCU04917	0.695291		0.13944	gray			NCU05675
NCU04918	-0.137524		0.1387	gray			NCU05676
NCU04919	0.409699		0.16759	gray			NCU05677
NCU04920	1.43718		0.2192	gray			NCU05678
NCU04923	1.57673		-0.6048	gray			NCU05679
NCU04926	-3.8436		0.07063	gray			NCU05699
NCU04934	1.05312		-0.32726	gray			NCU05713
NCU04935	0.195741		-0.15561	gray			NCU05769
NCU04937	-1.85528		-0.14282	gray			NCU05845
NCU04938	-0.667174		0.3352	gray			NCU05866
NCU04947	1.37354		-0.27965	gray			NCU05886
NCU04948	1.17123		-0.26979	gray			NCU05887
NCU04949	0.559349		-0.43895	gray			NCU05888
NCU04951	-1.48372		-0.52477	gray			NCU05896
NCU04991	-0.172738		0.52159	gray			NCU05897
NCU04992	-2.18087		0.35159	gray			NCU05899
NCU04994	-0.848007		0.29207	gray			NCU05900
NCU04997	1.16165		0.49726	gray			NCU05903
NCU05000	-0.142141		0.58533	gray			NCU05906
NCU05004	2.65134		-0.1574	gray			NCU05907
NCU05017	0.489372		-0.80425	gray			NCU05908
NCU05018	0.543146		-0.486	gray			NCU05909
NCU05048	-3.13424		0.35808	gray			NCU05910
NCU05049	1.53207		-0.04902	gray			NCU05911
NCU05055	-4.14942		0.46393	gray			NCU05912
NCU05056	-0.580098		0.62514	gray			NCU05914
NCU05057	0.912569		0.41512	gray			NCU05918
NCU05058	2.12794		-0.33751	gray			NCU05919
NCU05059	-1.30462		0.57961	gray			NCU05920
NCU05060	-0.834998		0.21173	gray			NCU05921
NCU05061	0.079972		-0.06413	gray			NCU06155
NCU05063	-1.0294		-0.01636	gray			NCU06157
NCU05069	-1.99947		0.5449	gray			NCU06159
NCU05073	-0.0162794		0.23436	gray			NCU06161
NCU05074	-0.313682		0.22306	gray			NCU06163
NCU05079	-1.05249		0.21811	gray			NCU06164
NCU05080	-0.237861		0.17431	gray			NCU06165
NCU05082	-2.69659		-0.09874	gray			NCU06420
NCU05085	-1.85527		0.49665	gray			NCU06885
NCU05086	-2.144		0.64567	gray			NCU06886
NCU05089	-0.0770501		0.10902	gray			NCU06887
NCU05091	-2.69656		0.40825	gray			NCU06888
NCU05092	-3.13389		-0.23088	gray			NCU06889
NCU05093	-3.54524		0.58952	gray			NCU06896
NCU05094	-1.9554		0.22696	gray			NCU06897
NCU05096	0.730291		0.89161	gray			NCU06898
NCU05098	-0.0270444		0.49165	gray			NCU06899
NCU05099	-2.69744		0.38372	gray			NCU06901
NCU05100	-2.34144		0.07547	gray			NCU06902
NCU05101	-0.0728543		-0.43804	gray			NCU06903
NCU05104	0.437995		0.70943	gray			NCU06904
NCU05105	1.12222		-0.00514001	gray			NCU06905
NCU05107	-0.297798		-0.21283	gray			NCU06953
NCU05108	-2.69656		0.11553	gray			NCU06954
NCU05110	-0.46187		0.64473	gray			NCU06955
NCU05111	-0.984446		0.0562	gray			NCU07049
NCU05112	0.662546		0.22596	gray			NCU07050
NCU05113	-1.11697		0.11124	gray			NCU07051
NCU05114	1.37621		-0.14995	gray			NCU07053
NCU05155	-2.0925		-0.22454	gray			NCU07054
NCU05156	-1.26712		-0.40676	gray			NCU07055
NCU05158	1.24307		-0.98587	gray			NCU07076
NCU05160	-0.99779		0.24725	gray			NCU07083
NCU05163	0.605239		-0.01898	gray			NCU07084
NCU05164	-0.465787		-0.10927	gray			NCU07085
NCU05165	1.40188		0.01992	gray			NCU07086
NCU05170	1.44719		-0.30244	gray			NCU07087
NCU05171	-1.16944		-0.43534	gray			NCU07088
NCU05172	0.490886		0.15817	gray			NCU07089
NCU05173	1.81681		0.19256	gray			NCU07090
NCU05175	-2.19871		0.4193	gray			NCU07091
NCU05178	-3.61142		0.18968	gray			NCU07092
NCU05179	-3.36023		0.08432	gray			NCU07094
NCU05183	-1.55541		-0.20483	gray			NCU07095
NCU05187	1.88768		-0.98486	gray			NCU07099
NCU05189	-0.386212		-0.70881	gray			NCU07102
NCU05191	0.785697		-0.09386	gray			NCU07103
NCU05321	-1.33119		-0.12502	gray			NCU07104
NCU05462	-2.39737		0.1152	gray			NCU07105
NCU05463	-0.729834		0.53493	gray			NCU07106
NCU05466	-2.69121		0.29582	gray			NCU07107
NCU05467	-3.16406		0.20165	gray			NCU07109
NCU05469	-1.24434		0.13407	gray			NCU07110
NCU05470	0.759506		0.07453	gray			NCU07111
NCU05479	-2.11533		-0.0723	gray			NCU07114
NCU05655	-0.0957552		0.58536	gray			NCU07115
NCU05656	-2.8477		0.17543	gray			NCU07116
NCU05657	-1.62462		0.28909	gray			NCU07119
NCU05659	1.13035		0.04758	gray			NCU07124
NCU05660	-2.11589		0.0799	gray			NCU07130
NCU05661	-0.931868		0.11328	gray			NCU07132
NCU05662	2.06911		-0.25828	gray			NCU07133
NCU05663	0.797267		-0.52667	gray			NCU07134
NCU05666	-0.750574		-0.08261	gray			NCU07136
NCU05671	-0.977279		-0.08047	gray			NCU07138
NCU05673	-2.49396		-0.22281	gray			NCU07139
NCU05674	-2.76314		0.21014	gray			NCU07140
NCU05675	1.8132		0.03968	gray			NCU07142
NCU05676	4.09616		-0.24758	gray			NCU07143
NCU05677	1.48761		-0.41864	gray			NCU07144
NCU05678	-4.7389		0.000900005	gray			NCU07145
NCU05679	-2.11714		-0.26134	gray			NCU07146
NCU05699	-0.908118		0.50238	gray			NCU07147
NCU05713	-1.9591		0.19352	gray			NCU07148
NCU05769	-1.53685		-0.77917	gray			NCU07149
NCU05866	-1.69872		0.2127	gray			NCU07150
NCU05886	-1.8511		0.36015	gray			NCU07151
NCU05887	-0.783379		0.43559	gray			NCU07152
NCU05888	-0.848492		0.37714	gray			NCU07161
NCU05896	0.214838		0.06204	gray			NCU07162
NCU05900	-1.67666		-0.06365	gray			NCU07163
NCU05909	1.46081		-0.86928	gray			NCU07206
NCU05910	-0.953568		-0.84006	gray			NCU07207
NCU05914	-0.33559		-0.93618	gray			NCU07208
NCU05918	0.787752		-0.41983	gray			NCU07209
NCU05919	0.988057		-0.66553	gray			NCU07210
NCU05920	0.0565722		-0.57529	gray			NCU07211
NCU05921	0.119551		-0.61931	gray			NCU07212
NCU06157	-1.09711		-0.92801	gray			NCU07213
NCU06161	2.2386		-0.56823	gray			NCU07214
NCU06885	-2.11589		-0.69658	gray			NCU07215
NCU06886	4.43277		-0.68234	gray			NCU07216
NCU06887	-1.19378		-0.59478	gray			NCU07217
NCU06888	2.87202		-0.59058	gray			NCU07218
NCU06889	0.460855		-0.35394	gray			NCU07219
NCU06896	-2.84764		-0.57426	gray			NCU07222
NCU06897	0.780991		-0.68656	gray			NCU07224
NCU06903	-0.46266		-0.91287	gray			NCU07225
NCU06954	2.31846		0.05202	gray			NCU07226
NCU06955	0		-0.1101	gray			NCU07227
NCU07051	-0.152819		-0.90225	gray			NCU07228
NCU07055	-0.2718		-0.44145	gray			NCU07229
NCU07076	-0.351456		-0.75229	gray			NCU07230
NCU07083	1.20271		-0.97964	gray			NCU07231
NCU07087	4.05723		-0.89913	gray			NCU07232
NCU07092	0.833995		-0.36965	gray			NCU07234
NCU07095	-0.323317		-0.66015	gray			NCU07235
NCU07099	-2.50749		-0.24813	gray			NCU07237
NCU07102	-0.977305		-0.37129	gray			NCU07241
NCU07103	-2.6853		0.00747001	gray			NCU07242
NCU07104	-0.016236		-0.21144	gray			NCU07243
NCU07105	-0.749466		-0.18858	gray			NCU07244
NCU07106	-1.85525		0.00254	gray			NCU07245
NCU07107	-0.27048		-0.41555	gray			NCU07249
NCU07110	0.208077		-0.91996	gray			NCU07480
NCU07111	0.445489		-0.89167	gray			NCU07510
NCU07114	-1.11797		-0.35702	gray			NCU07511
NCU07115	0.637475		-0.27185	gray			NCU07518
NCU07116	0.328197		-0.10999	gray			NCU07581
NCU07119	-0.815466		-0.21753	gray			NCU07582
NCU07130	-1.68618		0.28785	gray			NCU07592
NCU07132	0.397405		-0.10549	gray			NCU07593
NCU07133	1.06675		0.13211	gray			NCU07594
NCU07134	-1.68263		0.19901	gray			NCU07595
NCU07136	-1.58959		0.05785	gray			NCU07596
NCU07139	0.285985		0.59912	gray			NCU07597
NCU07140	-0.53978		0.47065	gray			NCU07599
NCU07142	-0.964649		0.09658	gray			NCU07600
NCU07143	0.302446		0.42625	gray			NCU07601
NCU07144	-1.18546		0.65187	gray			NCU07602
NCU07145	-1.85528		0.43576	gray			NCU07603
NCU07146	-3.99646		0.37703	gray			NCU07606
NCU07147	-1.12313		0.28186	gray			NCU07609
NCU07148	-2.69659		0.26896	gray			NCU07610
NCU07149	-0.122146		0.7901	gray			NCU07617
NCU07151	-1.14796		-0.24586	gray			NCU07618
NCU07161	-0.0162927		-0.80287	gray			NCU07620
NCU07162	-1.17428		0.60619	gray			NCU07622
NCU07163	-1.27753		0.22401	gray			NCU07623
NCU07206	-0.420121		-0.05754	gray			NCU07624
NCU07207	-1.80629		0.25932	gray			NCU07625
NCU07208	-2.17647		0.29514	gray			NCU07626
NCU07209	-0.859498		0.27442	gray			NCU07627
NCU07210	-0.331081		0.02838	gray			NCU07628
NCU07211	-1.58363		0.47699	gray			NCU07629
NCU07212	-1.90274		0.37585	gray			NCU07630
NCU07213	-2.17648		0.24004	gray			NCU07631
NCU07214	-3.69358		0.37079	gray			NCU07632
NCU07216	-3.23116		0.24447	gray			NCU07633
NCU07217	1.11081		0.20447	gray			NCU07634
NCU07218	-1.40359		0.24186	gray			NCU07635
NCU07219	-0.0162927		0.15114	gray			NCU07636
NCU07224	-1.26175		0.31483	gray			NCU07637
NCU07225	-1.59904		0.33219	gray			NCU07638
NCU07226	-1.53818		0.55229	gray			NCU07640
NCU07227	-0.0162334		-0.06315	gray			NCU07641
NCU07229	1.83536		0.43457	gray			NCU07642
NCU07230	0.671567		0.0901	gray			NCU07643
NCU07235	0.00230097		0.58913	gray			NCU07644
NCU07241	0.0102844		0.46175	gray			NCU07645
NCU07242	1.3438		0.241	gray			NCU07646
NCU07243	-1.19382		0.27172	gray			NCU07647
NCU07244	-1.14992		0.29055	gray			NCU07648
NCU07245	-1.32453		0.06691	gray			NCU07651
NCU07480	0.118984		-0.21292	gray			NCU07652
NCU07510	0.168423		-0.66061	gray			NCU07653
NCU07511	0.645479		-0.12611	gray			NCU07797
NCU07518	0.390112		-0.49656	gray			NCU07802
NCU07581	2.32497		0.38411	gray			NCU08049
NCU07582	0.979278		0.02826	gray			NCU08059
NCU07592	-3.25847		-0.01886	gray			NCU08073
NCU07593	1.167		0.12707	gray			NCU08074
NCU07594	-3.52273		0.13348	gray			NCU08075
NCU07595	-2.03661		0.08778	gray			NCU08076
NCU07599	-1.15297		0.11193	gray			NCU08077
NCU07600	-3.84038		0.36633	gray			NCU08078
NCU07601	1.46637		0.35492	gray			NCU08079
NCU07603	-3.51817		0.23922	gray			NCU08080
NCU07606	-0.0162927		-0.4626	gray			NCU08081
NCU07609	0.285495		-0.35822	gray			NCU08083
NCU07610	-1.30909		-0.07425	gray			NCU08084
NCU07617	-1.52352		-0.28449	gray			NCU08085
NCU07618	0.355443		-0.33247	gray			NCU08086
NCU07620	0.856805		-0.1228	gray			NCU08087
NCU07622	0.52266		-0.60903	gray			NCU08089
NCU07625	4.03008		0.09343	gray			NCU08095
NCU07626	-0.154252		0.05493	gray			NCU08096
NCU07627	-2.45131		0.1684	gray			NCU08097
NCU07628	-3.60991		0.09681	gray			NCU08099
NCU07629	-0.856143		0.00809	gray			NCU08100
NCU07630	-3.45737		0.14926	gray			NCU08101
NCU07631	-2.33896		0.17555	gray			NCU08102
NCU07632	-4.47436		0.47681	gray			NCU08103
NCU07633	-0.180499		0.44821	gray			NCU08105
NCU07634	-3.16305		0.46156	gray			NCU08106
NCU07635	-0.750574		-0.07838	gray			NCU08107
NCU07636	-1.85526		0.20419	gray			NCU08109
NCU07637	-3.49685		0.61419	gray			NCU08113
NCU07638	-4.11611		0.55805	gray			NCU08116
NCU07640	-1.54755		0.26054	gray			NCU08182
NCU07641	-2.22058		0.2277	gray			NCU08186
NCU07642	0		0.29553	gray			NCU08187
NCU07643	0.190441		0.49668	gray			NCU08188
NCU07644	-1.27409		0.56662	gray			NCU08189
NCU07645	-4.56435		0.43578	gray			NCU08192
NCU07646	0		0.09276	gray			NCU08200
NCU07647	-1.93349		0.27927	gray			NCU08204
NCU07648	-1.16918		0.10137	gray			NCU08206
NCU07651	-0.682345		0.07004	gray			NCU08207
NCU07652	-1.58523		0.18198	gray			NCU08208
NCU07653	2.25181		-0.24539	gray			NCU08209
NCU07797	-1.82823		0.19023	gray			NCU08210
NCU07802	0.710526		-0.02541	gray			NCU08211
NCU08049	0.731375		0.03362	gray			NCU08212
NCU08059	-1.85528		-0.55501	gray			NCU08213
NCU08073	1.4392		-0.15279	gray			NCU08219
NCU08074	2.69026		-0.28539	gray			NCU08220
NCU08075	-2.18841		0.30662	gray			NCU08221
NCU08076	-0.340038		0.45091	gray			NCU08222
NCU08077	0.461972		0.24851	gray			NCU08223
NCU08078	-1.25338		-0.48416	gray			NCU08224
NCU08079	2.17326		-0.59864	gray			NCU08225
NCU08080	0		-0.06655	gray			NCU08226
NCU08081	-1.53683		0.05973	gray			NCU08232
NCU08083	-3.10938		-0.62496	gray			NCU08233
NCU08084	0.731739		-0.05457	gray			NCU08234
NCU08086	4.70391		-0.65322	gray			NCU08235
NCU08095	-1.30414		-0.70282	gray			NCU08236
NCU08096	0.0838368		-0.24241	gray			NCU08237
NCU08097	1.28968		-0.63817	gray			NCU08238
NCU08099	1.74373		-0.57745	gray			NCU08239
NCU08100	1.83088		-0.38308	gray			NCU08240
NCU08101	-1.25483		0.11835	gray			NCU08241
NCU08102	-0.0888924		-0.32337	gray			NCU08242
NCU08103	1.45475		-0.77178	gray			NCU08243
NCU08105	-1.10335		-0.01187	gray			NCU08244
NCU08106	-3.25275		0.11812	gray			NCU08245
NCU08107	-1.82072		0.29027	gray			NCU08246
NCU08109	0.231676		0.24314	gray			NCU08247
NCU08113	-0.0679881		0.14527	gray			NCU08248
NCU08116	0.705062		0.17755	gray			NCU08249
NCU08182	-2.84773		-0.46873	gray			NCU08250
NCU08187	1.04003		-0.42248	gray			NCU08251
NCU08188	-1.34462		-0.89427	gray			NCU08252
NCU08189	-0.410529		-0.52895	gray			NCU08253
NCU08192	-0.0162799		-0.5312	gray			NCU08254
NCU08200	1.53039		-0.19294	gray			NCU08255
NCU08204	-4.18789		0.16843	gray			NCU08256
NCU08206	-0.856143		-0.24553	gray			NCU08257
NCU08207	-2.52776		-0.33901	gray			NCU08258
NCU08208	-1.29198		-0.56598	gray			NCU08259
NCU08209	-1.2869		0.30238	gray			NCU08260
NCU08210	0.00983217		0.19505	gray			NCU08261
NCU08211	-0.645016		0.16601	gray			NCU08262
NCU08212	-2.11589		0.217	gray			NCU08263
NCU08213	-1.85528		0.10659	gray			NCU08264
NCU08219	-3.91147		0.09042	gray			NCU08265
NCU08220	-1.28718		0.14989	gray			NCU08431
NCU08221	-3.43189		0.2868	gray			NCU08521
NCU08224	0.377487		-0.64283	gray			NCU08522
NCU08225	1.30068		-0.29351	gray			NCU08523
NCU08226	0.932224		-0.28039	gray			NCU08524
NCU08233	-0.154786		-0.60519	gray			NCU08530
NCU08234	-2.11587		0.25466	gray			NCU08531
NCU08235	-2.41096		0.48398	gray			NCU08532
NCU08236	-4.92197		0.48152	gray			NCU08533
NCU08237	-2.33649		0.44894	gray			NCU08534
NCU08238	-3.77074		0.28887	gray			NCU08537
NCU08240	0.654047		0.27856	gray			NCU08538
NCU08241	-0.657247		0.40607	gray			NCU08539
NCU08242	-1.53836		0.12507	gray			NCU08541
NCU08243	-2.52773		0.44013	gray			NCU08542
NCU08244	-3.43121		0.0365	gray			NCU08543
NCU08245	-1.85917		0.49539	gray			NCU08544
NCU08246	-0.789804		0.31019	gray			NCU08545
NCU08248	-1.2869		0.39749	gray			NCU08546
NCU08250	1.98465		0.357	gray			NCU08547
NCU08251	-2.39165		0.35372	gray			NCU08548
NCU08252	-2.43982		0.63931	gray			NCU08549
NCU08253	-1.85525		0.61677	gray			NCU08557
NCU08254	-1.30058		0.65935	gray			NCU08558
NCU08255	-1.53685		0.4491	gray			NCU08569
NCU08257	-2.34462		0.48836	gray			NCU08570
NCU08258	-2.64463		0.90116	gray			NCU08571
NCU08259	-0.750528		0.46689	gray			NCU08572
NCU08260	0.373109		0.57343	gray			NCU08573
NCU08261	1.69018		0.47841	gray			NCU08574
NCU08262	-2.52772		0.56344	gray			NCU08575
NCU08263	-1.85528		0.36685	gray			NCU08576
NCU08264	-3.33083		0.51661	gray			NCU08630
NCU08265	-3.48031		0.45542	gray			NCU08635
NCU08431	-1.02906		-0.71724	gray			NCU08638
NCU08521	2.13492		-0.55628	gray			NCU08639
NCU08532	-1.1902		0.21221	gray			NCU08640
NCU08533	1.16261		0.15233	gray			NCU08641
NCU08534	-3.77132		0.30623	gray			NCU08752
NCU08537	-1.06103		-0.11065	gray			NCU08753
NCU08538	-1.98984		0.06332	gray			NCU08755
NCU08541	-1.69532		-0.14763	gray			NCU08756
NCU08542	-0.629757		0.0212	gray			NCU08757
NCU08546	3.61982		0.00890001	gray			NCU08763
NCU08547	-0.102443		-0.14545	gray			NCU08764
NCU08548	-0.0162699		-0.02753	gray			NCU08765
NCU08549	0.309755		-0.42501	gray			NCU08768
NCU08569	-1.00859		-0.06448	gray			NCU08769
NCU08571	0		-0.27555	gray			NCU08770
NCU08572	0.682948		-0.04504	gray			NCU08780
NCU08573	-0.750574		-0.01702	gray			NCU08781
NCU08574	-2.52776		0.21603	gray			NCU08784
NCU08575	-0.750574		0.41196	gray			NCU08785
NCU08576	-0.344975		-0.15524	gray			NCU08789
NCU08635	-3.11542		0.38966	gray			NCU08790
NCU08638	-0.866568		0.32783	gray			NCU08795
NCU08639	-1.88322		0.05103	gray			NCU08796
NCU08752	-1.03765		0.29084	gray			NCU08797
NCU08753	-1.32587		0.30547	gray			NCU08799
NCU08755	0.265404		0.3523	gray			NCU08800
NCU08757	0.333337		0.36292	gray			NCU08801
NCU08763	-0.839401		0.2434	gray			NCU08802
NCU08764	1.75136		0.03666	gray			NCU08812
NCU08765	-0.0162927		0.25331	gray			NCU08813
NCU08768	0.527513		-0.12729	gray			NCU08814
NCU08769	-1.61063		-0.40167	gray			NCU08818
NCU08780	-2.61869		-0.55411	gray			NCU08829
NCU08781	-2.11589		-0.43968	gray			NCU08830
NCU08785	-3.16713		0.61294	gray			NCU08832
NCU08789	-0.874828		-0.49832	gray			NCU08833
NCU08790	1.60671		-0.75882	gray			NCU08834
NCU08795	0.358956		-0.361	gray			NCU08835
NCU08797	-0.161483		0.04318	gray			NCU08836
NCU08799	-0.0162786		-0.93493	gray			NCU08837
NCU08800	-0.0162794		-0.90374	gray			NCU08838
NCU08801	-0.682154		-0.75189	gray			NCU08845
NCU08802	-0.0162674		-0.74922	gray			NCU08865
NCU08812	1.39594		-0.65529	gray			NCU08866
NCU08813	-0.0162806		-0.8318	gray			NCU08881
NCU08814	-3.01425		-0.7709	gray			NCU08883
NCU08865	-1.56994		-0.15621	gray			NCU08884
NCU08866	-0.0162927		-0.17846	gray			NCU08885
NCU08881	-1.45397		-0.83962	gray			NCU08905
NCU08883	-0.750574		-0.58789	gray			NCU08907
NCU08884	-1.63045		-0.65448	gray			NCU08912
NCU08885	0.684442		-0.47234	gray			NCU08915
NCU08905	-0.0621874		-0.35843	gray			NCU08916
NCU08912	-1.54329		0.18396	gray			NCU08917
NCU08915	-0.66674		-0.12765	gray			NCU08918
NCU08916	2.54773		0.11631	gray			NCU09026
NCU08917	-2.52767		-0.14975	gray			NCU09046
NCU08918	0.518323		-0.98064	gray			NCU09147
NCU09026	-1.94297		-0.52135	gray			NCU09148
NCU09046	1.55267		-0.951	gray			NCU09149
NCU09148	3.10131		0.04828	gray			NCU09150
NCU09150	-1.19382		-0.07723	gray			NCU09151
NCU09151	0.519244		-0.0323	gray			NCU09158
NCU09158	-0.49483		0.04102	gray			NCU09163
NCU09163	0.0420022		0.30373	gray			NCU09164
NCU09164	-0.97767		-0.70032	gray			NCU09165
NCU09166	-0.0180003		0.25099	gray			NCU09166
NCU09167	1.60247		0.51656	gray			NCU09167
NCU09168	1.80727		0.35678	gray			NCU09168
NCU09171	-4.3089		0.90902	gray			NCU09169
NCU09172	-0.812668		0.69077	gray			NCU09170
NCU09173	1.33133		-0.01061	gray			NCU09171
NCU09176	-1.94988		0.07481	gray			NCU09172
NCU09177	-1.12816		0.21357	gray			NCU09173
NCU09178	-0.898964		0.22171	gray			NCU09176
NCU09179	-2.89855		0.43151	gray			NCU09177
NCU09180	-1.30961		0.4271	gray			NCU09178
NCU09184	-3.63701		0.56926	gray			NCU09179
NCU09185	-0.914085		0.51329	gray			NCU09180
NCU09186	-0.125481		0.69429	gray			NCU09181
NCU09187	0.420665		0.37198	gray			NCU09182
NCU09188	-0.740903		0.38211	gray			NCU09183
NCU09189	0.0766116		0.49356	gray			NCU09184
NCU09190	-1.53685		0.17664	gray			NCU09185
NCU09274	0.898001		-0.64984	gray			NCU09186
NCU09275	-1.5508		-0.06	gray			NCU09187
NCU09276	-0.446615		-0.17459	gray			NCU09188
NCU09277	-0.379956		-0.26945	gray			NCU09189
NCU09278	-1.3857		-0.32032	gray			NCU09190
NCU09279	0.102071		-0.5783	gray			NCU09274
NCU09293	1.79401		-0.48442	gray			NCU09275
NCU09305	-1.13458		-0.07018	gray			NCU09276
NCU09338	1.3979		-0.36589	gray			NCU09277
NCU09339	0		-0.21943	gray			NCU09278
NCU09431	4.25297		-0.38047	gray			NCU09279
NCU09452	-0.750558		-0.30914	gray			NCU09293
NCU09453	-0.0162651		-0.08233	gray			NCU09304
NCU09455	-1.46014		-0.04456	gray			NCU09305
NCU09456	1.81297		-0.03941	gray			NCU09306
NCU09484	1.6237		0.27745	gray			NCU09338
NCU09486	0.547693		0.81404	gray			NCU09339
NCU09487	-1.75109		0.74307	gray			NCU09431
NCU09490	-0.242304		0.19972	gray			NCU09452
NCU09491	-0.1777		-0.42762	gray			NCU09453
NCU09494	-0.295671		0.45373	gray			NCU09455
NCU09495	-1.7108		-0.02082	gray			NCU09456
NCU09519	-0.500175		0.23728	gray			NCU09484
NCU09520	-0.80106		0.67586	gray			NCU09486
NCU09524	-1.72941		0.3548	gray			NCU09487
NCU09525	1.16708		0.24644	gray			NCU09490
NCU09526	-1.09768		0.41038	gray			NCU09491
NCU09577	-2.34249		0.14634	gray			NCU09494
NCU09579	0.516905		-0.09114	gray			NCU09495
NCU09582	-0.974821		0.26235	gray			NCU09506
NCU09584	-0.750574		0.42968	gray			NCU09519
NCU09585	-3.3347		0.28727	gray			NCU09520
NCU09586	-3.69207		0.21482	gray			NCU09523
NCU09587	-0.750574		0.26349	gray			NCU09524
NCU09588	-1.1938		0.31567	gray			NCU09525
NCU09589	2.34839		0.05792	gray			NCU09526
NCU09591	0		-0.30547	gray			NCU09577
NCU09593	0.77374		-0.14016	gray			NCU09578
NCU09612	-0.966132		-0.22736	gray			NCU09579
NCU09613	0.292444		0.33247	gray			NCU09582
NCU09620	-1.87668		0.00958999	gray			NCU09584
NCU09623	2.21112		-0.10536	gray			NCU09585
NCU09627	0.545596		-0.46512	gray			NCU09586
NCU09629	-0.400599		0.07589	gray			NCU09587
NCU09630	-0.959196		-0.06885	gray			NCU09588
NCU09631	-0.367465		0.05228	gray			NCU09589
NCU09632	1.81022		-0.74623	gray			NCU09590
NCU09635	-1.33979		0.41282	gray			NCU09591
NCU09636	-2.06452		0.52963	gray			NCU09593
NCU09637	-1.35472		0.49501	gray			NCU09603
NCU09638	0.968499		0.43853	gray			NCU09604
NCU09639	0.372196		-0.08307	gray			NCU09605
NCU09640	-0.416566		0.2952	gray			NCU09612
NCU09645	-1.18056		0.09742	gray			NCU09613
NCU09652	-0.0571101		0.09758	gray			NCU09619
NCU09660	1.60958		-0.91285	gray			NCU09620
NCU09664	-1.31367		0.00582999	gray			NCU09623
NCU09665	-3.33085		0.18806	gray			NCU09627
NCU09698	-1.10395		-0.65837	gray			NCU09629
NCU09724	0.737299		0.21264	gray			NCU09630
NCU09725	-1.62463		0.29466	gray			NCU09631
NCU09726	-3.8626		0.06272	gray			NCU09632
NCU09834	-1.62489		0.20865	gray			NCU09633
NCU09835	-1.19375		-0.18514	gray			NCU09634
NCU09836	-1.24071		-0.80262	gray			NCU09635
NCU09837	-1.48055		0.15232	gray			NCU09636
NCU09838	0.975932		-0.3625	gray			NCU09637
NCU09839	-0.131155		-0.70274	gray			NCU09638
NCU09851	1.07636		0.00223001	gray			NCU09639
NCU09856	1.968		0.09791	gray			NCU09640
NCU09857	1.98834		-0.09688	gray			NCU09641
NCU09901	-0.298488		0.27487	gray			NCU09645
NCU09907	2.97541		0.36347	gray			NCU09650
NCU09908	-3.6921		0.12223	gray			NCU09651
NCU09909	1.2401		0.49963	gray			NCU09652
NCU09913	-1.04506		0.73252	gray			NCU09660
NCU09914	-1.59635		0.313	gray			NCU09664
NCU09947	-1.10082		-0.00357999	gray			NCU09665
NCU09948	0.665374		0.20509	gray			NCU09698
NCU09949	-0.0162457		0.23281	gray			NCU09724
NCU09950	3.95471		0.12849	gray			NCU09725
NCU09951	4.70402		0.31292	gray			NCU09726
NCU09952	2.30657		0.20414	gray			NCU09834
NCU09954	1.46429		0.45534	gray			NCU09835
NCU09955	1.32041		0.16808	gray			NCU09836
NCU09956	1.61655		0.30471	gray			NCU09837
NCU09959	-1.83356		-0.12073	gray			NCU09838
NCU09961	-3.69765		0.27846	gray			NCU09839
NCU09965	-3.74002		0.31997	gray			NCU09851
NCU09966	1.20719		0.35413	gray			NCU09855
NCU09988	0.483477		-0.8101	gray			NCU09856
NCU10004	-0.128738		0.75105	gray			NCU09857
NCU10005	-2.98449		0.0482	gray			NCU09901
NCU10027	-1.34915		0.45934	gray			NCU09904
NCU10030	-0.735418		0.17546	gray			NCU09906
NCU10037	-2.81527		0.22702	gray			NCU09907
NCU10038	0.392418		0.19157	gray			NCU09908
NCU10039	-0.0663645		0.29973	gray			NCU09909
NCU10040	-1.49998		0.3208	gray			NCU09913
NCU10055	-0.489438		-0.38687	gray			NCU09914
NCU10070	-1.11111		0.01058	gray			NCU09939
NCU10129	-0.598344		0.24194	gray			NCU09947
NCU10210	-2.98447		0.36134	gray			NCU09948
NCU10285	-1.88364		0.53702	gray			NCU09949
NCU10344	0.189335		-0.69587	gray			NCU09950
NCU10427	0.925521		0.4663	gray			NCU09951
NCU10501	-1.23931		0.38626	gray			NCU09952
NCU10502	2.73491		0.24644	gray			NCU09953
NCU10605	-0.682166		-0.23706	gray			NCU09954
NCU10629	-0.750574		-0.29367	gray			NCU09955
NCU10641	-0.0456144		0.28923	gray			NCU09956
NCU10644	0		0.5519	gray			NCU09957
NCU10766	-1.88331		0.08417	gray			NCU09958
NCU10936	-0.750574		-0.13362	gray			NCU09959
NCU11087	-2.04207		-0.5954	gray			NCU09961
NCU11286	-0.367185		0.38723	gray			NCU09964
NCU11292	-0.866845		-0.25336	gray			NCU09965
NCU11341	-0.162329		0.20518	gray			NCU09966
NCU11342	-3.04211		0.39062	gray			NCU09988
NCU11363	1.30412		0.27704	gray			NCU09990
NCU11364	1.61518		-0.24558	gray			NCU10004
NCU11409	0.195579		0.32925	gray			NCU10005
NCU12036	-1.53685		0.03942	gray			NCU10027
NCU12039	-1.85528		0.45699	gray			NCU10030
NCU12044	-0.750574		-0.83734	gray			NCU10031
NCU12052	1.75716		-0.8151	gray			NCU10037
NCU12065	-2.16114		0.12728	gray			NCU10038
NCU12076	0		-0.97335	gray			NCU10039
NCU12077	-2.69947		-0.63759	gray			NCU10040
NCU12078	-1.53681		-0.04515	gray			NCU10055
NCU12137	-0.581685		-0.65947	gray			NCU10070
NCU12144	-3.6921		0.23869	gray			NCU10129
NCU16305	1.13606		-0.03627	gray			NCU10210
NCU16307	-1.94598		-0.42131	gray			NCU10285
NCU16600	2.10967		0.1128	gray			NCU10344
NCU16611	-0.787973		-0.52674	gray			NCU10427
NCU16614	-3.35526		0.27601	gray			NCU10501
NCU16701	0.846852		-0.43642	gray			NCU10502
NCU16702	-1.7048		-0.35484	gray			NCU10538
NCU16704	-1.62461		0.5573	gray			NCU10539
NCU16705	-2.38896		0.47614	gray			NCU10572
NCU16706	-1.19382		0.26144	gray			NCU10605
NCU16707	-1.92695		0.3755	gray			NCU10629
NCU16716	1.92327		-0.2097	gray			NCU10641
NCU16718	-2.02882		-0.1496	gray			NCU10644
NCU16719	-1.40775		0.08177	gray			NCU10766
NCU16723	-1.53685		0.29679	gray			NCU10936
NCU16724	-1.71103		-0.03959	gray			NCU11087
NCU16728	-2.33648		0.39051	gray			NCU11088
NCU16729	-0.671373		-0.62501	gray			NCU11129
NCU16740	-3.63352		-0.26137	gray			NCU11134
NCU16741	-1.44024		-0.69147	gray			NCU11286
NCU16743	-0.450661		-0.03383	gray			NCU11291
NCU16744	-2.85094		-0.05418	gray			NCU11292
NCU16745	-1.98483		0.05014	gray			NCU11341
NCU16904	-1.61111		-0.07891	gray			NCU11342
NCU16905	-3.03878		0.19455	gray			NCU11363
NCU16906	-1.27101		0.39214	gray			NCU11364
NCU16916	-1.46173		0.66952	gray			NCU11365
NCU16924	-0.0162671		-0.3342	gray			NCU11405
NCU16926	-0.0162651		0.02672	gray			NCU11409
NCU16927	-0.0162794		0.12397	gray			NCU11424
NCU16928	0.0608256		0.30362	gray			NCU12036
NCU16929	-0.044375		0.11962	gray			NCU12039
NCU16936	-3.05871		-0.76909	gray			NCU12044
NCU17041	1.33266		0.01644	gray			NCU12045
NCU17043	0.777605		-0.07185	gray			NCU12050
NCU17044	-3.1426		-0.1147	gray			NCU12051
NCU17054	-0.357762		-0.19512	gray			NCU12052
NCU17055	-0.209898		0.10521	gray			NCU12065
NCU17066	-0.155876		-0.90947	gray			NCU12067
NCU17143	-1.19382		0.02806	gray			NCU12068
NCU17150	0.5538		-0.39296	gray			NCU12069
NCU17161	0.210798		-0.47462	gray			NCU12075
NCU17180	-0.789804		0.17348	gray			NCU12076
NCU17181	-1.53685		0.03958	gray			NCU12077
NCU17203	5.1548		-0.73735	gray			NCU12078
NCU17263	-1.96033		-0.70818	gray			NCU12137
NCU17264	-0.851894		-0.33623	gray			NCU12144
NCU17282	-2.24513		-0.0807	gray			NCU16305
NCU17283	-1.10623		-0.22371	gray			NCU16307
NCU03472	-0.873872		-1.37997	red			NCU16600
NCU03473	-2.43828		-1.38761	red			NCU16611
NCU03475	-1.3546		-1.75601	red			NCU16614
NCU04689	-0.115467		-1.02645	red			NCU16701
NCU04690	-0.432615		-1.23531	red			NCU16702
NCU04691	-0.262018		-1.38777	red			NCU16703
NCU04695	1.10992		-1.82992	red			NCU16704
NCU04700	0		-1.01467	red			NCU16705
NCU04887	-1.2674		-1.27161	red			NCU16706
NCU05102	0.961201		-1.06364	red			NCU16707
NCU05131	-0.446979		-1.48125	red			NCU16716
NCU05157	-1.13839		-1.20635	red			NCU16718
NCU05159	0.895795		-1.18475	red			NCU16719
NCU05906	-0.0722785		-1.29544	red			NCU16720
NCU05907	-1.75776		-1.45827	red			NCU16723
NCU05908	0.203532		-1.34953	red			NCU16724
NCU06898	0		-1.25185	red			NCU16728
NCU06899	2.22778		-1.14526	red			NCU16729
NCU06901	2.54323		-1.23929	red			NCU16738
NCU06904	-3.84364		-1.20656	red			NCU16740
NCU07053	-0.206954		-1.03736	red			NCU16741
NCU07084	-0.450652		-1.21118	red			NCU16742
NCU07085	2.10969		-1.20723	red			NCU16743
NCU07086	4.1276		-1.28418	red			NCU16744
NCU07088	0.0566754		-1.09622	red			NCU16745
NCU07089	4.31513		-1.3178	red			NCU16876
NCU07090	-0.932081		-1.13122	red			NCU16904
NCU07109	0.292109		-1.44275	red			NCU16905
NCU08524	0.832544		-1.09678	red			NCU16906
NCU08818	-1.64195		-1.13845	red			NCU16916
NCU08829	-1.71347		-1.61642	red			NCU16924
NCU08833	0		-2.02075	red			NCU16925
NCU08836	3.7741		-1.81328	red			NCU16926
NCU08845	2.11215		-1.17755	red			NCU16927
NCU10538	0.903293		-1.08874	red			NCU16928
NCU10539	1.38318		-1.01229	red			NCU16929
NCU11129	-0.191378		-1.25792	red			NCU16930
NCU12045	1.63593		-2.10071	red			NCU16936
NCU16720	1.1352		-1.05192	red			NCU17041
NCU16742	-0.410489		-1.14631	red			NCU17042
NCU17137	0.710599		-1.0092	red			NCU17043
NCU17138	0.394866		-1.19049	red			NCU17044
NCU17170	-2.05073		-1.03034	red			NCU17053
NCU17172	0.796178		-1.13813	red			NCU17054
NCU00031	2.94378	up	-0.11419	gray			NCU17055
NCU00118	2.69353	up	0.06802	gray			NCU17066
NCU00149	8.20602	up	-0.07927	gray			NCU17137
NCU00231	2.38669	up	0.17212	gray			NCU17138
NCU00267	3.04032	up	-0.09215	gray			NCU17143
NCU00312	2.05389	up	-0.15855	gray			NCU17150
NCU00567	2.32769	up	0.0263	gray			NCU17161
NCU00646	2.0923	up	-0.30213	gray			NCU17170
NCU00742	2.67447	up	0.0197	gray			NCU17172
NCU00806	3.71424	up	-0.14133	gray			NCU17180
NCU00836	4.18846	up	0.12265	gray			NCU17181
NCU00844	4.14752	up	-0.14863	gray			NCU17202
NCU00845	4.33052	up	0.23706	gray			NCU17203
NCU00871	2.17221	up	-0.07299	gray			NCU17263
NCU00932	2.20604	up	-0.14222	gray			NCU17264
NCU00947	2.23207	up	-0.00513	gray			NCU17282
NCU00963	2.11429	up	0.0423501	gray			NCU17283
NCU01014	3.1939	up	0.47429	gray
NCU01064	4.09433	up	-0.21637	gray
NCU01066	7.5182	up	-0.05668	gray
NCU01076	3.94094	up	0.08876	gray
NCU01196	2.15302	up	0.19437	gray
NCU01339	2.45054	up	0.11861	gray
NCU01532	5.70676	up	0.07696	gray
NCU01589	2.22468	up	0.51353	gray
NCU01613	2.03446	up	0.22402	gray
NCU01653	2.38089	up	-0.04641	gray
NCU01667	2.25873	up	0.11271	gray
NCU01689	2.73884	up	-0.0454799	gray
NCU01784	2.43995	up	0.20071	gray
NCU01849	3.84973	up	0.35426	gray
NCU02105	2.20245	up	-0.11102	gray
NCU02126	2.21182	up	0.14444	gray
NCU02246	2.22325	up	0.13535	gray
NCU02324	5.37223	up	-0.0303701	gray
NCU02325	2.11141	up	0.15689	gray
NCU02339	5.37666	up	-0.000930004	gray
NCU02361	2.66397	up	-0.08013	gray
NCU02487	3.80668	up	0.0108899	gray
NCU02543	2.80268	up	-0.1805	gray
NCU02677	3.35293	up	0.24399	gray
NCU02704	3.14807	up	0.18873	gray
NCU02727	2.49152	up	0.03956	gray
NCU02879	7.63617	up	-0.3931	gray
NCU02880	9.65265	up	0.23753	gray
NCU02895	3.23873	up	-0.05796	gray
NCU02936	2.45873	up	-0.08436	gray
NCU03076	2.76536	up	-0.05025	gray
NCU03078	5.56055	up	0.10184	gray
NCU03213	2.76092	up	-0.02301	gray
NCU03376	4.59114	up	-0.06877	gray
NCU03468	2.49543	up	-0.55714	gray
NCU03478	4.51042	up	-0.37485	gray
NCU03481	6.66609	up	-0.51224	gray
NCU03484	2.50716	up	-0.12342	gray
NCU03499	4.24946	up	-0.43091	gray
NCU03561	2.13089	up	0.02664	gray
NCU03639	6.248	up	0.29915	gray
NCU03692	2.19221	up	0.0540201	gray
NCU03696	3.20581	up	-0.25834	gray
NCU03788	4.27468	up	0.29583	gray
NCU03789	3.12296	up	0.13019	gray
NCU03913	2.45652	up	-0.40789	gray
NCU04030	4.48109	up	-0.28142	gray
NCU04039	2.09346	up	0.05385	gray
NCU04169	2.41949	up	0.03232	gray
NCU04222	3.28039	up	0.15611	gray
NCU04228	3.61893	up	0.0553	gray
NCU04230	2.62359	up	0.18563	gray
NCU04234	6.36581	up	0.34845	gray
NCU04292	2.62896	up	0.01451	gray
NCU04303	2.4299	up	0.000300031	gray
NCU04366	4.65877	up	-0.10215	gray
NCU04467	2.18049	up	-0.14482	gray
NCU04490	3.50577	up	-0.14484	gray
NCU04542	2.30345	up	-0.00611	gray
NCU04547	6.23776	up	0.04698	gray
NCU04561	2.75199	up	-0.04663	gray
NCU04583	3.24598	up	0.0880201	gray
NCU04608	2.9213	up	-0.2256	gray
NCU04618	3.1111	up	0.17162	gray
NCU04656	2.09511	up	-0.35065	gray
NCU04699	2.46263	up	-0.78966	gray
NCU04778	3.15416	up	-0.18381	gray
NCU04909	2.05357	up	-0.76139	gray
NCU04924	2.18691	up	-0.14435	gray
NCU04939	2.66056	up	-0.07212	gray
NCU05035	2.07257	up	-0.36152	gray
NCU05037	2.51904	up	-0.28266	gray
NCU05038	2.65702	up	-0.17125	gray
NCU05045	2.8431	up	-0.17163	gray
NCU05046	3.85286	up	-0.47835	gray
NCU05127	2.12611	up	0.01774	gray
NCU05147	3.48249	up	-0.51769	gray
NCU05190	5.0506	up	-0.39835	gray
NCU05257	2.76105	up	-0.05595	gray
NCU05410	2.3867	up	-0.11485	gray
NCU05477	2.01088	up	0.04833	gray
NCU05499	2.52196	up	-0.43334	gray
NCU05516	2.40435	up	0.12265	gray
NCU05518	2.65413	up	0.27763	gray
NCU05537	3.21242	up	0.01301	gray
NCU05548	2.17638	up	-0.04027	gray
NCU05574	2.18248	up	-0.18612	gray
NCU05612	7.12429	up	-0.25449	gray
NCU05613	6.8886	up	-0.55114	gray
NCU05616	2.04798	up	-0.19573	gray
NCU05629	2.79173	up	0.05292	gray
NCU05707	3.93404	up	0.20794	gray
NCU05764	4.98648	up	-0.49382	gray
NCU05768	4.13649	up	-0.19701	gray
NCU05923	2.30371	up	-0.63843	gray
NCU05948	2.05011	up	-0.21331	gray
NCU06062	2.76566	up	-0.1302	gray
NCU06063	3.92189	up	-0.00278006	gray
NCU06129	2.62926	up	0.10981	gray
NCU06140	2.02708	up	-0.11816	gray
NCU06160	5.73175	up	-0.61887	gray
NCU06376	3.05371	up	0.00996992	gray
NCU06514	2.59222	up	-0.43173	gray
NCU06574	2.82371	up	-0.07356	gray
NCU06613	2.4603	up	0.15706	gray
NCU06650	4.8941	up	-0.25713	gray
NCU06666	2.23583	up	-0.13404	gray
NCU06721	2.05772	up	0.04798	gray
NCU06725	2.26741	up	-0.00295001	gray
NCU06783	2.42174	up	-0.13556	gray
NCU06785	2.23218	up	0.16188	gray
NCU06792	2.02756	up	-0.13594	gray
NCU06793	6.44621	up	0.34069	gray
NCU06895	3.61918	up	-0.58033	gray
NCU06911	3.66011	up	-0.02775	gray
NCU06919	2.36062	up	-0.15264	gray
NCU06936	2.81985	up	-0.0371299	gray
NCU07046	2.26017	up	-0.36443	gray
NCU07156	2.15673	up	0.12593	gray
NCU07176	3.90184	up	-0.2029	gray
NCU07298	2.20254	up	0.09411	gray
NCU07307	2.25274	up	0.05883	gray
NCU07308	2.3992	up	0.01487	gray
NCU07410	3.48209	up	0.10888	gray
NCU07517	2.38731	up	0.07345	gray
NCU07621	4.41428	up	-0.6567	gray
NCU07732	2.15124	up	0.23875	gray
NCU07760	3.25768	up	0.08973	gray
NCU07897	2.75593	up	0.00708001	gray
NCU07898	5.36015	up	-0.17601	gray
NCU07899	2.24809	up	0.0664599	gray
NCU07906	2.09923	up	-0.05005	gray
NCU07966	2.11105	up	0.06274	gray
NCU07969	3.47688	up	-0.0717699	gray
NCU07981	2.97334	up	0.11756	gray
NCU08117	2.03998	up	-0.12707	gray
NCU08183	2.79265	up	-0.36478	gray
NCU08275	2.06561	up	0.18211	gray
NCU08325	2.78452	up	0.11308	gray
NCU08383	2.97782	up	0.25683	gray
NCU08404	2.09954	up	0.15929	gray
NCU08437	4.68056	up	-0.35199	gray
NCU08440	2.22048	up	0.09318	gray
NCU08535	3.46547	up	-0.41133	gray
NCU08625	2.30908	up	0.14232	gray
NCU08863	3.41209	up	0.0577	gray
NCU08864	2.15377	up	-0.0540801	gray
NCU09049	2.22307	up	-0.48004	gray
NCU09093	3.38658	up	0.30169	gray
NCU09116	2.24204	up	0.0285099	gray
NCU09354	2.33386	up	-0.0468499	gray
NCU09402	2.481	up	0.06675	gray
NCU09412	4.64335	up	-0.19025	gray
NCU09497	2.89738	up	0.08493	gray
NCU09543	2.23775	up	0.21157	gray
NCU09596	3.66718	up	-0.44664	gray
NCU09597	5.24284	up	-0.31725	gray
NCU09648	5.67911	up	0.07376	gray
NCU09695	3.71497	up	-0.04193	gray
NCU09767	2.58027	up	0.06842	gray
NCU09794	2.20218	up	0.32045	gray
NCU09854	6.56667	up	-0.06366	gray
NCU09924	3.21482	up	-0.32489	gray
NCU10007	2.17917	up	-0.0350399	gray
NCU10245	2.12625	up	0.13081	gray
NCU10276	3.5552	up	-0.44254	gray
NCU10387	2.02957	up	0.20917	gray
NCU10521	3.10151	up	-0.70014	gray
NCU10799	3.02602	up	-0.34809	gray
NCU11383	2.67906	up	-0.41555	gray
NCU12025	4.35328	up	-0.0145001	gray
NCU12058	2.08826	up	-0.16233	gray
NCU16402	2.22423	up	-0.50959	gray
NCU16482	6.65597	up	-0.42104	gray
NCU16632	2.91513	up	-0.15473	gray
NCU16805	3.94107	up	-0.26657	gray
NCU17026	2.31249	up	-0.15685	gray
NCU17064	4.93144	up	-0.96435	gray
NCU17087	7.27169	up	-0.44481	gray
NCU17157	3.31319	up	-0.56544	gray
NCU17186	3.20814	up	-0.03586	gray
NCU17247	3.42054	up	-0.06946	gray
NCU17268	3.61838	up	-0.36168	gray
NCU17269	2.49899	up	0.11193	gray
NCU03477	5.25364	up	-1.36437	red
NCU08839	2.46789	up	-1.14268	red
NCU01958	-19.6279	down
NCU09968	-4.68715	down
NCU00175	-4.32305	down	0.11663	gray
NCU00176	-5.12434	down	-0.2402	gray
NCU00207	-2.45767	down	-0.07536	gray
NCU00247	-2.87226	down	-0.09777	gray
NCU00248	-2.70076	down	-0.04962	gray
NCU00260	-2.55793	down	0.07401	gray
NCU00306	-2.49527	down	0.18837	gray
NCU00314	-2.8121	down	-0.0312	gray
NCU00373	-2.11252	down	-0.02204	gray
NCU00399	-7.41703	down	-0.48884	gray
NCU00401	-2.56156	down	0.10059	gray
NCU00403	-3.36518	down	-0.08765	gray
NCU00451	-4.31763	down	-0.0838	gray
NCU00478	-2.2976	down	-0.0194799	gray
NCU00521	-2.39152	down	-0.21257	gray
NCU00552	-3.70276	down	-0.11263	gray
NCU00582	-4.81263	down	-0.40337	gray
NCU00585	-2.83868	down	0.02943	gray
NCU00586	-2.02449	down	-0.1033	gray
NCU00596	-2.34656	down	0.17415	gray
NCU00607	-11.8965	down	0.06369	gray
NCU00642	-3.53719	down	-0.17125	gray
NCU00643	-2.2832	down	-0.04755	gray
NCU00684	-3.51768	down	0.00642005	gray
NCU00691	-2.45007	down	0.0783	gray
NCU00694	-2.5005	down	0.08045	gray
NCU00697	-2.8689	down	-0.05292	gray
NCU00701	-3.31027	down	-0.08776	gray
NCU00705	-2.1135	down	-0.09437	gray
NCU00716	-9.4391	down	-0.20872	gray
NCU00717	-2.85382	down	-0.19792	gray
NCU00732	-4.63922	down	0.06478	gray
NCU00754	-3.04561	down	-0.0730099	gray
NCU00757	-3.15841	down	-0.0257601	gray
NCU00759	-3.2781	down	0.26856	gray
NCU00761	-3.37176	down	-0.0433999	gray
NCU00773	-2.13036	down	-0.06886	gray
NCU00788	-2.06827	down	-0.04758	gray
NCU00790	-4.11549	down	-0.0822699	gray
NCU00797	-5.78532	down	0.10875	gray
NCU00801	-3.16205	down	-0.11504	gray
NCU00826	-2.53703	down	0.03749	gray
NCU00835	-2.68762	down	0.18728	gray
NCU00850	-2.37019	down	-0.22362	gray
NCU00853	-2.22887	down	-0.16253	gray
NCU00855	-5.51439	down	-0.10272	gray
NCU00865	-2.8006	down	-0.2342	gray
NCU00899	-2.15309	down	0.19365	gray
NCU00937	-2.23714	down	-0.01367	gray
NCU00939	-2.13197	down	0.09287	gray
NCU00985	-3.05301	down	0.1249	gray
NCU00988	-2.69475	down	0.28976	gray
NCU00990	-3.0347	down	-0.03381	gray
NCU00995	-2.39699	down	-0.90274	gray
NCU00999	-3.91386	down	0.11348	gray
NCU01009	-2.30023	down	-0.0582599	gray
NCU01010	-2.29984	down	-0.0992	gray
NCU01034	-5.26485	down	-0.3241	gray
NCU01038	-3.14724	down	-0.1029	gray
NCU01048	-3.16448	down	0.13562	gray
NCU01061	-2.58606	down	-0.08263	gray
NCU01063	-5.10207	down	-0.11286	gray
NCU01068	-3.14866	down	-0.09105	gray
NCU01072	-2.083	down	-0.29283	gray
NCU01080	-2.40489	down	0.16642	gray
NCU01089	-2.32404	down	0.06583	gray
NCU01092	-2.54079	down	0.08092	gray
NCU01106	-3.89098	down	-0.22957	gray
NCU01109	-4.26943	down	0.06292	gray
NCU01123	-6.81544	down	-0.05023	gray
NCU01124	-2.83317	down	-0.10721	gray
NCU01127	-2.33164	down	-0.50068	gray
NCU01162	-2.20648	down	-0.11896	gray
NCU01193	-2.4351	down	-0.1782	gray
NCU01210	-3.17776	down	0.29695	gray
NCU01214	-2.00897	down	0.01313	gray
NCU01223	-2.19391	down	0.15246	gray
NCU01231	-3.42856	down	0.0558601	gray
NCU01233	-2.12119	down	-0.03044	gray
NCU01312	-2.06955	down	0.04115	gray
NCU01385	-4.37778	down	-0.0529799	gray
NCU01424	-2.64623	down	-0.0775	gray
NCU01426	-2.54702	down	0.12378	gray
NCU01430	-4.04346	down	0.15607	gray
NCU01432	-2.39894	down	0.01531	gray
NCU01444	-2.01648	down	-0.22088	gray
NCU01476	-2.11787	down	0.05484	gray
NCU01477	-2.39632	down	0.12695	gray
NCU01504	-2.56222	down	0.20897	gray
NCU01509	-2.33039	down	0.09865	gray
NCU01517	-2.11351	down	0.07361	gray
NCU01530	-2.7909	down	-0.03143	gray
NCU01581	-2.0026	down	-0.0145	gray
NCU01591	-4.77979	down	0.16336	gray
NCU01620	-3.56273	down	-0.11304	gray
NCU01629	-2.55769	down	0.00297003	gray
NCU01633	-2.40915	down	-0.28085	gray
NCU01678	-3.89937	down	0.06885	gray
NCU01734	-3.56208	down	-0.19735	gray
NCU01735	-4.45309	down	-0.43253	gray
NCU01748	-2.16943	down	-0.000579928	gray
NCU01880	-2.26683	down	-0.02048	gray
NCU01883	-2.20651	down	0.03232	gray
NCU01898	-3.53128	down	-0.08515	gray
NCU01899	-3.90194	down	-0.08016	gray
NCU01903	-2.66576	down	-0.18779	gray
NCU01906	-2.12154	down	0.03763	gray
NCU01911	-2.29704	down	-0.10681	gray
NCU01917	-2.74381	down	-0.09434	gray
NCU01957	-3.24064	down	-0.04874	gray
NCU02042	-2.03588	down	-0.00333	gray
NCU02051	-2.56919	down	0.19805	gray
NCU02062	-2.29132	down	-0.00528005	gray
NCU02074	-2.1031	down	0.1103	gray
NCU02084	-2.58153	down	-0.24516	gray
NCU02097	-2.6041	down	0.0249199	gray
NCU02122	-3.30509	down	-0.0294	gray
NCU02137	-2.09043	down	0.13926	gray
NCU02138	-2.97978	down	-0.11991	gray
NCU02163	-2.96466	down	-0.03892	gray
NCU02164	-2.13043	down	0.16513	gray
NCU02175	-3.11487	down	0.08676	gray
NCU02190	-2.9065	down	-0.21271	gray
NCU02191	-3.23746	down	0.12708	gray
NCU02213	-2.458	down	0.08309	gray
NCU02243	-2.28332	down	0.34398	gray
NCU02257	-2.15953	down	0.08999	gray
NCU02317	-2.92872	down	-0.12408	gray
NCU02338	-2.51274	down	0.04365	gray
NCU02363	-2.69425	down	0.09886	gray
NCU02369	-4.71085	down	-0.12856	gray
NCU02478	-2.37685	down	-0.00154	gray
NCU02558	-2.74707	down	0.06101	gray
NCU02579	-2.22446	down	0.02802	gray
NCU02584	-2.30042	down	0.01174	gray
NCU02660	-2.18669	down	-0.15685	gray
NCU02691	-2.47858	down	-0.0145	gray
NCU02713	-3.06899	down	-0.28044	gray
NCU02798	-2.45444	down	-0.01596	gray
NCU02799	-3.42082	down	0.05783	gray
NCU02819	-3.09152	down	-0.15101	gray
NCU02854	-3.33011	down	0.16116	gray
NCU02856	-5.7966	down	0.29816	gray
NCU02875	-2.65343	down	-0.11089	gray
NCU02883	-3.03251	down	0.06167	gray
NCU02945	-2.68282	down	0.07204	gray
NCU02975	-2.79134	down	0.00516002	gray
NCU03035	-2.75126	down	0.0446999	gray
NCU03064	-2.0495	down	-0.15617	gray
NCU03098	-2.46505	down	-0.07775	gray
NCU03141	-2.03682	down	0.2866	gray
NCU03197	-2.25649	down	0.12807	gray
NCU03208	-3.36795	down	-0.22177	gray
NCU03222	-3.76496	down	-0.0828999	gray
NCU03270	-2.2305	down	0.02049	gray
NCU03271	-2.77863	down	0.18964	gray
NCU03388	-5.13949	down	-0.30741	gray
NCU03403	-2.51274	down	-0.0203999	gray
NCU03427	-3.67537	down	-0.02389	gray
NCU03428	-3.09415	down	0.07247	gray
NCU03501	-2.43646	down	-0.07596	gray
NCU03534	-6.2038	down	-0.12378	gray
NCU03601	-2.574	down	-0.14044	gray
NCU03602	-2.1308	down	-0.07299	gray
NCU03604	-2.50927	down	-0.03587	gray
NCU03641	-3.95201	down	0.09709	gray
NCU03646	-4.4092	down	-0.16422	gray
NCU03651	-4.58947	down	-0.20075	gray
NCU03654	-2.11128	down	0.07925	gray
NCU03660	-2.55553	down	-0.04512	gray
NCU03686	-3.34911	down	0.13114	gray
NCU03699	-2.37687	down	0.0354199	gray
NCU03707	-2.76751	down	-0.03534	gray
NCU03736	-2.24912	down	0.02784	gray
NCU03755	-2.10971	down	-0.09172	gray
NCU03762	-2.29739	down	0.0669	gray
NCU03771	-4.90086	down	0.12015	gray
NCU03773	-3.14494	down	-0.03992	gray
NCU03803	-2.03336	down	-0.02552	gray
NCU03805	-2.50528	down	-0.03309	gray
NCU03821	-2.04922	down	-0.24585	gray
NCU03868	-2.76156	down	0.62308	gray
NCU03878	-2.12582	down	-0.10934	gray
NCU03918	-3.26841	down	-0.27754	gray
NCU03921	-2.48723	down	0.19565	gray
NCU03931	-2.09306	down	-0.11247	gray
NCU03940	-4.76218	down	-0.0254	gray
NCU03950	-2.15103	down	0.08224	gray
NCU03967	-3.54831	down	-0.09559	gray
NCU04042	-2.00052	down	0.15556	gray
NCU04065	-2.7908	down	-0.0729701	gray
NCU04066	-3.14058	down	0.10668	gray
NCU04085	-3.05552	down	0.22178	gray
NCU04144	-2.1863	down	0.08227	gray
NCU04148	-4.19147	down	0.17211	gray
NCU04197	-4.38915	down	-0.15352	gray
NCU04205	-6.00206	down	-0.13666	gray
NCU04209	-5.12361	down	-0.2375	gray
NCU04211	-3.65876	down	-0.12464	gray
NCU04219	-2.3854	down	-0.06696	gray
NCU04262	-2.22271	down	0.12817	gray
NCU04265	-2.86633	down	-0.11592	gray
NCU04268	-2.29576	down	0.12841	gray
NCU04269	-2.31004	down	0.06781	gray
NCU04283	-2.02313	down	-0.03015	gray
NCU04285	-2.02105	down	0.57743	gray
NCU04295	-2.29825	down	0.19995	gray
NCU04350	-2.46537	down	-0.13431	gray
NCU04351	-4.99399	down	-0.15117	gray
NCU04352	-2.79541	down	-0.11083	gray
NCU04367	-2.42592	down	0.07111	gray
NCU04395	-2.52275	down	0.16585	gray
NCU04430	-2.79327	down	0.19863	gray
NCU04433	-2.15152	down	-0.0298299	gray
NCU04442	-2.51885	down	-0.10432	gray
NCU04451	-5.40856	down	-0.02456	gray
NCU04492	-2.03034	down	-0.05861	gray
NCU04493	-2.50921	down	0.03228	gray
NCU04506	-2.53907	down	0.20717	gray
NCU04526	-4.27045	down	-0.00363007	gray
NCU04528	-3.48457	down	0.02171	gray
NCU04555	-2.12096	down	-0.01998	gray
NCU04591	-4.24717	down	0.0493799	gray
NCU04632	-2.06057	down	0.09897	gray
NCU04671	-2.11132	down	0.19712	gray
NCU04721	-2.0823	down	0.02644	gray
NCU04818	-2.8135	down	-0.0897599	gray
NCU04819	-3.96145	down	-0.09217	gray
NCU04913	-2.23313	down	-0.39345	gray
NCU04931	-2.55118	down	0.05245	gray
NCU04952	-2.88417	down	-0.32356	gray
NCU04963	-4.15312	down	-0.45011	gray
NCU05022	-4.29529	down	-0.12613	gray
NCU05068	-4.09701	down	0.43853	gray
NCU05122	-7.83063	down	-0.44868	gray
NCU05134	-4.39501	down	-0.01554	gray
NCU05137	-2.85971	down	-0.21706	gray
NCU05143	-2.25661	down	-0.21215	gray
NCU05153	-2.88894	down	-0.28531	gray
NCU05161	-2.01169	down	0.29042	gray
NCU05202	-2.57215	down	-0.07852	gray
NCU05212	-2.29891	down	0.08481	gray
NCU05229	-2.2813	down	-0.08359	gray
NCU05236	-2.09489	down	-0.09671	gray
NCU05291	-3.34519	down	-0.03803	gray
NCU05315	-2.55902	down	-0.19812	gray
NCU05350	-2.25969	down	-0.06292	gray
NCU05384	-3.98479	down	-0.07285	gray
NCU05394	-4.07401	down	-0.03546	gray
NCU05395	-4.56494	down	-0.4483	gray
NCU05401	-2.1858	down	-0.17019	gray
NCU05414	-2.27754	down	0.29554	gray
NCU05417	-2.16804	down	0.22789	gray
NCU05508	-2.30115	down	-0.13043	gray
NCU05524	-2.47788	down	0.0382	gray
NCU05534	-5.74121	down	-0.15428	gray
NCU05546	-2.07581	down	0.27059	gray
NCU05567	-3.16539	down	-0.29383	gray
NCU05568	-4.49249	down	0.08755	gray
NCU05583	-2.67343	down	-0.32094	gray
NCU05595	-3.28574	down	0.10661	gray
NCU05597	-4.20336	down	-0.00465999	gray
NCU05598	-4.00847	down	0.24337	gray
NCU05627	-3.39061	down	0.03763	gray
NCU05637	-2.10027	down	0.04778	gray
NCU05667	-2.86481	down	-0.27104	gray
NCU05668	-4.49202	down	0.02927	gray
NCU05686	-3.24966	down	0.20542	gray
NCU05721	-3.17792	down	0.21115	gray
NCU05722	-2.0625	down	-0.0577599	gray
NCU05728	-2.04017	down	0.08712	gray
NCU05751	-2.14509	down	-0.47842	gray
NCU05755	-3.30178	down	-0.12506	gray
NCU05784	-2.26431	down	-0.03186	gray
NCU05788	-4.40632	down	0.09527	gray
NCU05819	-2.97076	down	0.15679	gray
NCU05842	-2.02093	down	0.1114	gray
NCU05844	-2.10983	down	0.07099	gray
NCU05854	-2.5914	down	0.08717	gray
NCU05860	-3.32422	down	-0.1324	gray
NCU05873	-2.50185	down	0.0831	gray
NCU05880	-3.32209	down	-0.12415	gray
NCU05881	-2.00632	down	0.38548	gray
NCU05882	-2.59111	down	0.12061	gray
NCU05964	-5.26948	down	0.32929	gray
NCU05978	-2.17626	down	0.39384	gray
NCU05980	-3.26628	down	0.20698	gray
NCU06010	-2.01435	down	0.22036	gray
NCU06042	-2.5861	down	0.06316	gray
NCU06045	-3.91051	down	0.11198	gray
NCU06046	-5.09799	down	-0.15328	gray
NCU06114	-2.69042	down	-0.14847	gray
NCU06119	-2.48642	down	-0.0981201	gray
NCU06121	-2.16145	down	0.01744	gray
NCU06137	-4.58565	down	-0.02389	gray
NCU06148	-2.35196	down	0.0252	gray
NCU06252	-2.8143	down	0.14265	gray
NCU06305	-4.62602	down	-0.03923	gray
NCU06306	-3.04733	down	-0.00603996	gray
NCU06312	-2.55264	down	0.12899	gray
NCU06315	-2.12777	down	-0.10128	gray
NCU06316	-2.47218	down	0.0944101	gray
NCU06326	-2.96523	down	-0.31722	gray
NCU06327	-2.10238	down	0.10793	gray
NCU06328	-2.20483	down	-0.16647	gray
NCU06373	-3.09715	down	-0.02444	gray
NCU06427	-5.9163	down	-0.1086	gray
NCU06443	-2.84943	down	0.12294	gray
NCU06465	-2.47566	down	-0.1451	gray
NCU06518	-2.29284	down	-0.05887	gray
NCU06524	-4.47964	down	-0.15496	gray
NCU06525	-2.23253	down	-0.13404	gray
NCU06531	-2.88354	down	-0.03623	gray
NCU06589	-2.24127	down	-0.12847	gray
NCU06604	-5.00378	down	0.05276	gray
NCU06655	-3.90616	down	0.000350007	gray
NCU06669	-2.4811	down	-0.08446	gray
NCU06682	-2.47318	down	-0.09397	gray
NCU06719	-3.15916	down	-0.37049	gray
NCU06810	-3.10379	down	-0.12365	gray
NCU06824	-2.52331	down	-0.13365	gray
NCU06841	-2.88763	down	-0.24585	gray
NCU06847	-3.01308	down	0.01695	gray
NCU06910	-2.01497	down	-0.08704	gray
NCU06915	-7.41559	down	0.29684	gray
NCU06961	-2.92403	down	-0.18515	gray
NCU06969	-2.39013	down	0.29089	gray
NCU06989	-2.8039	down	0.03568	gray
NCU07033	-4.771	down	-0.17198	gray
NCU07034	-2.04451	down	-0.1299	gray
NCU07061	-2.01559	down	-0.05246	gray
NCU07075	-3.44061	down	-0.28976	gray
NCU07221	-2.67163	down	0.09552	gray
NCU07253	-2.37623	down	0.12398	gray
NCU07277	-2.79708	down	0.32023	gray
NCU07325	-2.77384	down	0.09534	gray
NCU07338	-2.29213	down	-0.14675	gray
NCU07349	-2.13792	down	-0.33256	gray
NCU07359	-2.78334	down	-0.15022	gray
NCU07392	-2.15136	down	-0.30358	gray
NCU07454	-2.31184	down	0.10308	gray
NCU07476	-2.08149	down	0.0540501	gray
NCU07540	-2.53491	down	-0.16645	gray
NCU07541	-2.44499	down	0.3548	gray
NCU07569	-5.65936	down	-0.32158	gray
NCU07695	-2.89	down	0.1168	gray
NCU07728	-2.16188	down	-0.0506301	gray
NCU07737	-2.00269	down	0.18168	gray
NCU07748	-2.12076	down	-0.14618	gray
NCU07749	-3.06374	down	0.23435	gray
NCU07768	-2.9508	down	0.12469	gray
NCU07769	-4.23594	down	0.16799	gray
NCU07787	-6.62655	down	-0.20517	gray
NCU07817	-4.97786	down	-0.37656	gray
NCU07818	-2.17836	down	-0.09693	gray
NCU07819	-5.66701	down	-0.00195005	gray
NCU07823	-3.28582	down	0.0686	gray
NCU07825	-2.72575	down	0.02836	gray
NCU07840	-2.89248	down	-0.22458	gray
NCU07841	-2.12052	down	0.19202	gray
NCU07869	-2.36106	down	0.08803	gray
NCU07881	-2.95469	down	0.04742	gray
NCU07888	-3.58604	down	0.01565	gray
NCU07934	-2.99455	down	0.42788	gray
NCU07935	-2.38405	down	-0.15809	gray
NCU07938	-3.15179	down	0.09897	gray
NCU07949	-2.04389	down	0.1478	gray
NCU07971	-3.065	down	-0.03721	gray
NCU07977	-2.6675	down	-0.19916	gray
NCU08013	-2.50426	down	-0.30534	gray
NCU08052	-7.77346	down	0.41458	gray
NCU08070	-2.5878	down	-0.00736002	gray
NCU08114	-2.22524	down	0.03804	gray
NCU08128	-4.41163	down	0.000390001	gray
NCU08159	-2.09348	down	0.0151	gray
NCU08168	-2.46588	down	-0.39867	gray
NCU08170	-2.42238	down	-0.3019	gray
NCU08173	-4.48286	down	0.00351999	gray
NCU08230	-2.31046	down	-0.45523	gray
NCU08270	-2.21007	down	-0.12552	gray
NCU08288	-2.87574	down	-0.11838	gray
NCU08337	-2.52709	down	0.08765	gray
NCU08378	-2.54191	down	0.72745	gray
NCU08438	-8.44301	down	-0.3846	gray
NCU08487	-2.06219	down	-0.1566	gray
NCU08606	-3.38858	down	-0.00289996	gray
NCU08610	-2.67915	down	0.13552	gray
NCU08621	-2.10043	down	-0.0135	gray
NCU08626	-3.52164	down	0.21253	gray
NCU08631	-2.08232	down	0.43261	gray
NCU08636	-2.93247	down	0.33658	gray
NCU08643	-3.83045	down	0.34479	gray
NCU08683	-2.11228	down	-0.31433	gray
NCU08695	-2.47606	down	-0.31859	gray
NCU08697	-2.25538	down	-0.05416	gray
NCU08699	-4.0914	down	-0.19812	gray
NCU08702	-2.69942	down	-0.18623	gray
NCU08709	-2.5625	down	0.15941	gray
NCU08715	-2.11956	down	0.06695	gray
NCU08720	-5.775	down	-0.14013	gray
NCU08727	-2.29004	down	0.0584299	gray
NCU08738	-3.149	down	0.14597	gray
NCU08739	-5.45752	down	0.2926	gray
NCU08742	-2.50536	down	-0.02966	gray
NCU08747	-4.05424	down	-0.0554	gray
NCU08750	-3.97316	down	-0.0159599	gray
NCU08791	-2.31944	down	0.17974	gray
NCU08806	-2.04694	down	-0.04355	gray
NCU08842	-3.30167	down	-0.17281	gray
NCU08850	-2.18074	down	-0.05953	gray
NCU08851	-3.25869	down	-0.23884	gray
NCU08901	-2.18538	down	0.01724	gray
NCU08909	-3.29152	down	-0.42449	gray
NCU08936	-2.19155	down	0.01204	gray
NCU08967	-2.1495	down	0.16886	gray
NCU09023	-2.76544	down	-0.39463	gray
NCU09066	-2.6595	down	-0.24155	gray
NCU09069	-2.12842	down	0.03934	gray
NCU09074	-5.95987	down	0.05647	gray
NCU09075	-2.11601	down	0.12599	gray
NCU09079	-2.2741	down	-0.14014	gray
NCU09099	-3.00899	down	-0.0716901	gray
NCU09108	-2.18224	down	0.25682	gray
NCU09126	-3.9615	down	-0.05639	gray
NCU09174	-2.35492	down	0.33217	gray
NCU09214	-2.27749	down	-0.0294	gray
NCU09235	-4.5123	down	-0.37085	gray
NCU09247	-2.33233	down	-0.13786	gray
NCU09253	-2.22825	down	-0.01045	gray
NCU09261	-3.16096	down	-0.20602	gray
NCU09262	-4.48734	down	0.00732993	gray
NCU09263	-3.38074	down	-0.0959701	gray
NCU09267	-3.65404	down	-0.0306501	gray
NCU09287	-2.16052	down	-0.03683	gray
NCU09335	-2.90912	down	-0.27769	gray
NCU09420	-11.0251	down	-0.17363	gray
NCU09421	-2.29093	down	-0.13667	gray
NCU09424	-4.76381	down	0.1598	gray
NCU09502	-2.42538	down	-0.02389	gray
NCU09522	-2.0749	down	0.37193	gray
NCU09532	-2.24569	down	-0.1473	gray
NCU09534	-2.33961	down	-0.12551	gray
NCU09535	-2.10178	down	0.09825	gray
NCU09559	-6.66685	down	0.21098	gray
NCU09567	-4.30661	down	0.12974	gray
NCU09568	-2.71805	down	0.37675	gray
NCU09615	-2.35684	down	0.24159	gray
NCU09616	-2.41705	down	0.34645	gray
NCU09617	-4.02764	down	0.30775	gray
NCU09672	-2.01083	down	0.16096	gray
NCU09702	-4.98733	down	-0.04204	gray
NCU09714	-2.16898	down	-0.26319	gray
NCU09761	-4.97784	down	0.25396	gray
NCU09762	-4.92891	down	0.17723	gray
NCU09773	-3.85092	down	-0.13777	gray
NCU09774	-3.04733	down	0.11623	gray
NCU09775	-6.81757	down	0.20373	gray
NCU09776	-4.1695	down	-0.00119001	gray
NCU09830	-2.40286	down	0.06219	gray
NCU09832	-3.94815	down	-0.09993	gray
NCU09915	-2.33465	down	-0.13278	gray
NCU09976	-3.73871	down	0.0536	gray
NCU10010	-2.98539	down	-0.10353	gray
NCU10011	-2.09851	down	-0.17227	gray
NCU10021	-2.43563	down	0.01351	gray
NCU10063	-2.73929	down	0.07539	gray
NCU10470	-4.02069	down	0.08634	gray
NCU10500	-3.43291	down	-0.18825	gray
NCU10603	-3.29225	down	-0.16381	gray
NCU10697	-2.61632	down	0.3599	gray
NCU10703	-4.41805	down	0.04664	gray
NCU10761	-5.92268	down	-0.12072	gray
NCU10852	-2.65296	down	-0.11075	gray
NCU10865	-6.23007	down	0.07058	gray
NCU10895	-5.15328	down	-0.02388	gray
NCU11216	-5.50446	down	0.75685	gray
NCU11253	-2.60718	down	-0.18178	gray
NCU11260	-2.74343	down	-0.16997	gray
NCU11324	-2.37079	down	0.14571	gray
NCU11352	-2.1266	down	-0.16782	gray
NCU11417	-3.42175	down	0.08049	gray
NCU12125	-2.44775	down	-0.20289	gray
NCU15833	-2.93135	down	-0.50983	gray
NCU15834	-2.34222	down	0.02703	gray
NCU16323	-2.19388	down	-0.36819	gray
NCU16343	-2.36786	down	-0.0441599	gray
NCU16347	-2.44737	down	-0.18693	gray
NCU16348	-3.08223	down	-0.44247	gray
NCU16350	-4.22545	down	-0.05478	gray
NCU16404	-4.04951	down	-0.07213	gray
NCU16443	-2.57958	down	0.0753299	gray
NCU16445	-5.78169	down	-0.25	gray
NCU16494	-5.28061	down	0.10403	gray
NCU16591	-4.70392	down	-0.51214	gray
NCU16597	-2.14026	down	-0.11105	gray
NCU16625	-4.81111	down	-0.04244	gray
NCU16661	-3.04241	down	-0.0509	gray
NCU16664	-2.63827	down	-0.06821	gray
NCU16688	-3.68067	down	-0.15009	gray
NCU16699	-2.25306	down	-0.49264	gray
NCU16756	-2.06217	down	-0.09215	gray
NCU16771	-6.02908	down	-0.10489	gray
NCU16819	-2.82038	down	-0.14834	gray
NCU16827	-2.44038	down	-0.01025	gray
NCU16834	-4.27683	down	-0.3259	gray
NCU16852	-2.03983	down	-0.15511	gray
NCU16867	-2.96679	down	0.13212	gray
NCU16875	-3.34326	down	-0.72232	gray
NCU16918	-6.5942	down	-0.05292	gray
NCU16967	-4.52893	down	-0.0478	gray
NCU16980	-2.96749	down	-0.11345	gray
NCU16997	-2.09719	down	-0.12501	gray
NCU17069	-2.65805	down	-0.29322	gray
NCU17113	-2.09003	down	-0.0699	gray
NCU00077	1.04604
NCU00164	0.194541
NCU01959	0
NCU01960	-0.856083
NCU09969	-1.0409
NCU00003	0.290729		-0.05094	gray
NCU00004	0.285007		-0.25328	gray
NCU00005	-0.670287		0.28269	gray
NCU00006	-0.519436		0.00760998	gray
NCU00007	-1.27359		0.21349	gray
NCU00008	0.523594		0.00956994	gray
NCU00009	1.38834		-0.06116	gray
NCU00010	-1.06792		-0.03321	gray
NCU00011	-2.38306		-0.06527	gray
NCU00013	-1.84831		0.00382994	gray
NCU00014	0.216387		0.05169	gray
NCU00015	-1.0423		-0.06384	gray
NCU00017	1.75755		0.19332	gray
NCU00018	0.494444		0.07549	gray
NCU00019	-0.133622		0.11356	gray
NCU00021	1.60699		0.14357	gray
NCU00022	0.261154		0.15211	gray
NCU00023	-0.0745978		0.0301501	gray
NCU00024	-0.967427		-0.07996	gray
NCU00025	-1.62993		0.0251001	gray
NCU00026	-1.81238		0.10458	gray
NCU00027	-1.12642		0.14934	gray
NCU00028	1.19983		0.02697	gray
NCU00029	-0.862197		0.03259	gray
NCU00030	0.813125		0.17726	gray
NCU00032	-1.4943		0.04963	gray
NCU00033	-0.601685		-0.14089	gray
NCU00034	-1.18059		0.0222	gray
NCU00035	-0.703017		-0.0588	gray
NCU00037	0.175597		-0.14617	gray
NCU00038	-0.401244		0.0119801	gray
NCU00039	-0.615051		0.41226	gray
NCU00040	0.464355		0.000610047	gray
NCU00041	-0.970028		0.0715199	gray
NCU00042	-1.8556		0.12427	gray
NCU00043	0.334711		-0.04616	gray
NCU00045	-0.597211		-0.02028	gray
NCU00046	0.178054		-0.10442	gray
NCU00047	-0.554265		0.19701	gray
NCU00048	-0.682166		-0.16055	gray
NCU00050	1.1819		-0.11611	gray
NCU00051	-0.143684		0.0524499	gray
NCU00052	0.939801		0.1952	gray
NCU00054	-0.826376		-0.1395	gray
NCU00055	-1.24328		0.0960999	gray
NCU00056	0.963055		-0.000929969	gray
NCU00057	0.0511008		0.26027	gray
NCU00059	1.03074		0.19836	gray
NCU00060	-0.129665		0.10013	gray
NCU00061	-1.42484		0.13884	gray
NCU00064	-1.1536		0.07176	gray
NCU00065	0.673831		0.3546	gray
NCU00066	0.215133		0.10231	gray
NCU00067	-0.646912		-0.28996	gray
NCU00068	-0.0204503		0.42227	gray
NCU00069	-0.51693		-0.1398	gray
NCU00070	-0.500794		0.1864	gray
NCU00071	-0.0162698		-0.000209975	gray
NCU00072	-0.41838		-0.10637	gray
NCU00073	-0.0388271		0.11152	gray
NCU00074	-0.561766		-0.09485	gray
NCU00075	0.072459		0.21856	gray
NCU00076	0.566351		-0.02971	gray
NCU00078	-0.0525002		0.08396	gray
NCU00079	-1.29181		0.25967	gray
NCU00080	-0.84416		0.22228	gray
NCU00081	0.258754		0.09709	gray
NCU00082	-1.38244		-0.17407	gray
NCU00083	0.385152		0.13207	gray
NCU00084	0.440724		0.32915	gray
NCU00085	-0.200225		0.12624	gray
NCU00086	0.473439		0.21389	gray
NCU00087	0.807197		-0.13272	gray
NCU00088	1.45136		-0.00672	gray
NCU00089	0.0716204		-0.11749	gray
NCU00090	1.02825		-0.04633	gray
NCU00091	0.308812		-0.17295	gray
NCU00092	0.911757		-0.07519	gray
NCU00093	-1.37337		0.02991	gray
NCU00095	0.245121		0.10302	gray
NCU00096	0.761863		0.01549	gray
NCU00097	-0.610645		0.02913	gray
NCU00099	-1.19382		-0.10777	gray
NCU00100	-0.208888		-0.02489	gray
NCU00101	0.732872		0.25848	gray
NCU00102	0.0368908		0.16287	gray
NCU00103	1.24036		0.22922	gray
NCU00104	-0.654165		0.21399	gray
NCU00105	0.0963694		0.10178	gray
NCU00106	1.5869		-0.03125	gray
NCU00107	0.737609		-0.20665	gray
NCU00108	-0.0404567		0.10105	gray
NCU00109	0.105747		-0.07596	gray
NCU00110	1.28192		0.23634	gray
NCU00111	-0.158824		-0.06073	gray
NCU00112	0.474006		0.11017	gray
NCU00114	0.758851		-0.10044	gray
NCU00115	0.504321		-0.19593	gray
NCU00116	0.0680784		0.02577	gray
NCU00117	0.00815822		-0.1155	gray
NCU00119	-0.344171		0.06563	gray
NCU00120	-0.282347		0.11846	gray
NCU00121	-1.17723		0.26588	gray
NCU00122	0.391022		0.0139299	gray
NCU00123	0		-0.36137	gray
NCU00124	-0.618025		0.05276	gray
NCU00125	0.27891		0.02379	gray
NCU00126	-0.745938		0.0768601	gray
NCU00127	-1.02748		-0.09173	gray
NCU00128	1.24317		0.24477	gray
NCU00129	-0.997403		-0.000949984	gray
NCU00130	0.759069		0.08988	gray
NCU00132	-0.289951		-0.0398701	gray
NCU00133	0.716541		0.24646	gray
NCU00134	0.563416		-0.21979	gray
NCU00135	-0.0355376		-0.19659	gray
NCU00136	1.1454		0.3231	gray
NCU00137	0.691646		-0.0447101	gray
NCU00138	-0.721278		-0.0337901	gray
NCU00142	-0.0960814		0.2027	gray
NCU00144	-1.15621		-0.00645995	gray
NCU00145	0.75414		-0.04666	gray
NCU00146	-0.792351		-0.18655	gray
NCU00147	0.115744		0.03474	gray
NCU00148	0.415343		0.07409	gray
NCU00150	0.836781		-0.09218	gray
NCU00151	0.213264		0.23586	gray
NCU00152	-0.714229		-0.0319601	gray
NCU00153	1.40683		0.042	gray
NCU00154	0.274862		0.23634	gray
NCU00155	-0.0401881		-0.11471	gray
NCU00157	0.617521		-0.31519	gray
NCU00158	0.222489		0.20279	gray
NCU00159	0.734394		0.05411	gray
NCU00160	0.040775		0.10032	gray
NCU00161	-0.651899		0.0468899	gray
NCU00162	0.715894		0.20628	gray
NCU00163	0.744064		0.0640699	gray
NCU00166	0.974294		-0.06946	gray
NCU00167	0.189591		0.21253	gray
NCU00168	1.01005		0.28526	gray
NCU00169	-0.770345		-0.17173	gray
NCU00170	0.764293		-0.00702997	gray
NCU00171	-0.929728		-0.06601	gray
NCU00172	-0.500066		-0.15519	gray
NCU00173	0.702059		-0.00135997	gray
NCU00177	1.55337		0.00957996	gray
NCU00178	0.13542		-0.11315	gray
NCU00180	1.93973		0.14134	gray
NCU00181	-0.784231		0.0758	gray
NCU00182	-0.974021		0.1826	gray
NCU00183	0.167289		0.36151	gray
NCU00184	-0.512406		-0.07592	gray
NCU00185	-1.75091		-0.11881	gray
NCU00186	-0.247991		0.02577	gray
NCU00187	1.21116		-0.10121	gray
NCU00188	-0.629111		0.23459	gray
NCU00189	-0.953031		-0.20147	gray
NCU00192	0		-0.02514	gray
NCU00193	0.940874		0.14305	gray
NCU00194	1.12845		0.22028	gray
NCU00195	1.69359		0.0553	gray
NCU00196	-0.958019		-0.08053	gray
NCU00197	-2.95975		-0.12215	gray
NCU00198	-0.450369		-0.25861	gray
NCU00199	0.461644		0.01731	gray
NCU00200	1.33498		0.12823	gray
NCU00201	-1.16624		0.17839	gray
NCU00202	0.429522		0.17188	gray
NCU00203	-1.3979		0.03412	gray
NCU00204	0.0586902		0.0255401	gray
NCU00205	0.756922		0.23669	gray
NCU00206	0.0937806		0.02721	gray
NCU00208	1.46456		0.16429	gray
NCU00209	-0.43726		-0.00964001	gray
NCU00210	0.372277		0.20883	gray
NCU00211	0.526983		0.25893	gray
NCU00212	-0.292683		-0.05245	gray
NCU00213	0.125073		0.0579	gray
NCU00214	0.235699		-0.27625	gray
NCU00215	0.506195		-0.23165	gray
NCU00216	0.61126		0.13158	gray
NCU00218	0.587705		-0.27042	gray
NCU00219	0.471012		0.22552	gray
NCU00220	-0.375834		-0.19381	gray
NCU00221	-1.27316		0.04905	gray
NCU00222	-0.128025		0.0533	gray
NCU00223	-0.0114684		-0.06278	gray
NCU00224	0		0.01954	gray
NCU00225	0.99418		0.11758	gray
NCU00226	-0.39471		0.12397	gray
NCU00227	1.49134		0.10618	gray
NCU00229	-2.11951		-0.21707	gray
NCU00230	-0.881925		-0.2287	gray
NCU00232	0.803866		0.10803	gray
NCU00233	-1.53695		-0.20386	gray
NCU00234	-1.08217		-0.0647	gray
NCU00236	-1.25053		-0.04451	gray
NCU00237	-0.504846		-0.04638	gray
NCU00238	-0.556187		0.07239	gray
NCU00239	-0.308925		-0.04172	gray
NCU00240	-0.54428		0.09659	gray
NCU00241	-1.32521		0.16751	gray
NCU00242	-0.592082		0.15941	gray
NCU00243	0.194696		-0.08599	gray
NCU00244	-1.71257		0.0821	gray
NCU00245	0.634234		0.29661	gray
NCU00246	-0.55267		-0.25452	gray
NCU00249	-0.867059		0.1338	gray
NCU00250	-1.60281		-0.32001	gray
NCU00251	-0.622904		0.06077	gray
NCU00252	0.59659		-0.15608	gray
NCU00253	0.328954		0.0972199	gray
NCU00254	0		0.00837005	gray
NCU00257	1.39626		0.39291	gray
NCU00258	0.766966		-0.17207	gray
NCU00259	-0.350245		0.11312	gray
NCU00261	0.933939		-0.13639	gray
NCU00262	-0.961678		-0.06604	gray
NCU00263	0.129127		0.11471	gray
NCU00264	0.591703		0.01785	gray
NCU00265	1.68533		0.375	gray
NCU00268	-0.546257		-0.17247	gray
NCU00269	-0.0942412		0.0891401	gray
NCU00270	-1.02944		0.15761	gray
NCU00271	-0.0162786		-0.13259	gray
NCU00272	-0.209317		0.25622	gray
NCU00273	0.492714		0.08001	gray
NCU00274	-0.469442		0.04476	gray
NCU00275	-1.79709		0.17509	gray
NCU00276	-0.319567		0.05385	gray
NCU00277	1.44618		0.26071	gray
NCU00278	0.734278		-0.14014	gray
NCU00279	0.69092		0.15562	gray
NCU00280	0.200058		0.14357	gray
NCU00281	-1.11113		0.18773	gray
NCU00282	-0.585947		-0.12517	gray
NCU00283	-1.21418		-0.22629	gray
NCU00284	0.366581		-0.20043	gray
NCU00285	-0.555147		-0.06239	gray
NCU00287	-1.55274		-0.10548	gray
NCU00288	-0.545141		-0.01787	gray
NCU00289	-1.16987		-0.07845	gray
NCU00290	1.08049		0.07445	gray
NCU00291	-0.112458		0.03598	gray
NCU00292	-1.48454		0.45307	gray
NCU00293	0.653137		-0.0601701	gray
NCU00294	0.641393		0.11211	gray
NCU00295	-0.452448		-0.0467901	gray
NCU00296	1.43087		-0.01492	gray
NCU00297	-0.686216		-0.0084	gray
NCU00298	-0.517172		-0.04211	gray
NCU00299	-0.799083		0.14839	gray
NCU00300	-0.966107		0.11474	gray
NCU00301	-0.209333		0.0722	gray
NCU00302	0.240971		-0.0520501	gray
NCU00303	0.482082		-0.08716	gray
NCU00304	0.0286895		-0.0679899	gray
NCU00305	0.103852		0.15426	gray
NCU00307	-0.981013		-0.08594	gray
NCU00308	-1.68262		0.21273	gray
NCU00309	0.82815		0.1144	gray
NCU00310	0.49488		0.27743	gray
NCU00311	0.0648652		-0.0355	gray
NCU00313	-1.81259		0.13351	gray
NCU00315	0.335004		-0.18768	gray
NCU00316	-0.259326		-0.21425	gray
NCU00317	-0.564022		0.29697	gray
NCU00318	-0.119223		-0.13051	gray
NCU00319	0.696516		0.00432997	gray
NCU00320	0.200252		-0.10232	gray
NCU00321	0.0712562		0.21832	gray
NCU00322	0.261263		-0.12084	gray
NCU00324	-0.0894627		-0.064	gray
NCU00325	-0.0971071		0.08332	gray
NCU00326	0.886884		-0.07584	gray
NCU00327	-1.66398		0.00410004	gray
NCU00329	-0.0211568		-0.11486	gray
NCU00330	-1.1867		0.10871	gray
NCU00331	0.536067		0.19123	gray
NCU00332	-1.41394		0.0209401	gray
NCU00333	0.00295565		-0.21225	gray
NCU00334	0.597243		0.02313	gray
NCU00335	0.00617834		-0.10089	gray
NCU00336	0.914191		-0.06299	gray
NCU00337	1.13957		0.28888	gray
NCU00338	-1.15377		-0.11138	gray
NCU00339	0		0.00744002	gray
NCU00340	-0.441004		-0.03097	gray
NCU00343	-1.04465		-0.20089	gray
NCU00344	0.0244465		0.12716	gray
NCU00345	-0.278023		0.18759	gray
NCU00346	0.139172		-0.00869005	gray
NCU00347	-0.598529		0.0194199	gray
NCU00348	-0.465393		-0.14834	gray
NCU00349	-0.906867		-0.0485299	gray
NCU00350	0.202015		0.16783	gray
NCU00351	-0.441873		0.24698	gray
NCU00352	-1.06316		-0.02588	gray
NCU00353	-2.86517		-0.47501	gray
NCU00354	-0.861694		-0.15997	gray
NCU00355	1.28171		0.0646	gray
NCU00356	-1.77258		-0.04031	gray
NCU00357	-0.520717		0.20518	gray
NCU00358	-0.0826547		-0.01109	gray
NCU00359	-0.666763		0.14892	gray
NCU00360	-1.04097		0.13875	gray
NCU00361	0.89654		-0.19906	gray
NCU00362	-0.445886		0.04288	gray
NCU00363	-1.88429		0.20775	gray
NCU00364	0.654384		-0.22823	gray
NCU00365	0.568503		-0.02112	gray
NCU00366	-0.337523		0.20628	gray
NCU00367	0.79766		0.31997	gray
NCU00368	-1.66294		0.16839	gray
NCU00369	-0.974447		0.17831	gray
NCU00370	-0.2608		0.03853	gray
NCU00371	0.57928		0.05647	gray
NCU00372	1.09431		0.03412	gray
NCU00375	-1.39434		0.24316	gray
NCU00376	0.831429		-0.218	gray
NCU00377	-0.38279		0.12123	gray
NCU00378	1.23205		0.22448	gray
NCU00379	-0.209152		0.06077	gray
NCU00380	0.0369199		-0.02321	gray
NCU00382	1.15452		0.05606	gray
NCU00384	-1.62585		0.0522	gray
NCU00385	0.571383		0.08471	gray
NCU00386	-1.38454		-0.11979	gray
NCU00387	0.246757		-0.00838	gray
NCU00388	-0.61152		0.02802	gray
NCU00389	1.16493		0.05631	gray
NCU00391	-0.97767		-0.17551	gray
NCU00392	0.287982		0.05786	gray
NCU00395	-0.146073		0.25889	gray
NCU00396	0.18352		-0.26509	gray
NCU00397	-1.03891		0.04747	gray
NCU00398	-0.0685505		-0.00847998	gray
NCU00400	-0.993601		0.05048	gray
NCU00404	0.170082		-0.16089	gray
NCU00405	1.63231		0.23226	gray
NCU00406	0.0134835		-0.07448	gray
NCU00407	0.409712		0.18222	gray
NCU00408	-0.0718868		-0.17049	gray
NCU00409	1.38596		-0.00589003	gray
NCU00410	0.645909		-0.04512	gray
NCU00411	0.594216		-0.04265	gray
NCU00412	-0.293604		-0.00182997	gray
NCU00413	0.490576		0.02826	gray
NCU00414	0.588948		-0.24149	gray
NCU00415	0.48218		-0.0457301	gray
NCU00416	-1.47162		-0.06314	gray
NCU00417	-0.571076		0.03675	gray
NCU00418	-0.00473828		-0.18158	gray
NCU00419	0.50348		-0.18271	gray
NCU00420	-1.45222		-0.0578199	gray
NCU00421	-0.0404107		0.14859	gray
NCU00422	1.0306		-0.1057	gray
NCU00423	-0.668251		0.00192001	gray
NCU00424	0.0611421		-0.08103	gray
NCU00425	-0.016278		0.31606	gray
NCU00426	0.330156		-0.18791	gray
NCU00427	-0.160994		-0.0132201	gray
NCU00428	0.180392		0.31179	gray
NCU00430	-0.773298		0.00446005	gray
NCU00431	0.22174		0.06572	gray
NCU00432	-0.522657		0.0478399	gray
NCU00434	-0.875346		0.16803	gray
NCU00435	-0.399005		0.000529969	gray
NCU00436	-0.0930618		0.042	gray
NCU00437	1.68139		0.04269	gray
NCU00438	0.995972		-0.10609	gray
NCU00440	-0.395169		-0.28535	gray
NCU00441	-1.11864		0.09897	gray
NCU00442	-0.032267		-0.24038	gray
NCU00443	0.270427		-0.01867	gray
NCU00444	0.399914		-0.14041	gray
NCU00445	-0.546189		-0.03712	gray
NCU00446	-0.253898		-0.2352	gray
NCU00447	-0.26686		0.02993	gray
NCU00448	-0.0393639		0.1597	gray
NCU00449	-2.019		0.18222	gray
NCU00450	-1.73696		0.20332	gray
NCU00453	-0.0224084		-0.0747601	gray
NCU00454	-0.43549		0.04976	gray
NCU00455	0.158612		-0.07542	gray
NCU00456	0.614424		-0.25397	gray
NCU00457	1.01814		0.06244	gray
NCU00458	0.401362		-0.04064	gray
NCU00459	-0.329351		0.13431	gray
NCU00461	-0.539603		0.01509	gray
NCU00462	-1.52688		0.11027	gray
NCU00463	1.29905		0.19574	gray
NCU00464	0.492836		0.10061	gray
NCU00465	0.826389		0.19758	gray
NCU00466	0.534528		0.32803	gray
NCU00467	0.185091		-0.13622	gray
NCU00468	-0.0193279		-0.0186701	gray
NCU00469	0.233355		0.09864	gray
NCU00470	0.636852		0.03565	gray
NCU00471	-1.23624		-0.22399	gray
NCU00472	0.730891		-0.10391	gray
NCU00473	-0.711399		0.07441	gray
NCU00474	2.11158		-0.09311	gray
NCU00475	0.463768		-0.12935	gray
NCU00476	1.34572		0.15883	gray
NCU00477	0.435459		0.05489	gray
NCU00480	-0.178162		0.0698801	gray
NCU00481	0.23839		0.04269	gray
NCU00483	-0.607782		-0.00721005	gray
NCU00484	-0.208391		-0.00458004	gray
NCU00485	-4.1811		-0.2926	gray
NCU00486	-1.62437		0.0559001	gray
NCU00487	1.62777		-0.08907	gray
NCU00488	0.390613		0.06909	gray
NCU00489	0.607273		-0.45255	gray
NCU00490	-1.49467		0.35238	gray
NCU00491	2.10985		-0.33201	gray
NCU00492	-0.496678		-0.1609	gray
NCU00493	-0.162135		0.01849	gray
NCU00494	0.590312		-0.01493	gray
NCU00495	-0.688283		0.07504	gray
NCU00496	-1.41404		0.05082	gray
NCU00497	-1.41751		0.07043	gray
NCU00498	0.0977135		0.10578	gray
NCU00499	-0.0995603		0.13654	gray
NCU00500	-0.932531		-0.04918	gray
NCU00501	0.956773		0.19149	gray
NCU00502	0.477009		-0.05596	gray
NCU00503	1.36338		-0.0438099	gray
NCU00504	1.05313		-0.27619	gray
NCU00505	0.429328		-0.2464	gray
NCU00506	0.128142		-0.34221	gray
NCU00509	-0.783484		0.03036	gray
NCU00510	-2.12548		-0.31402	gray
NCU00512	-0.819231		-0.17207	gray
NCU00513	-0.22597		-0.08557	gray
NCU00515	-1.55357		-0.17011	gray
NCU00516	-1.93753		-0.32798	gray
NCU00517	-0.206188		0.20986	gray
NCU00518	0.5733		0.33137	gray
NCU00519	1.26475		-0.23791	gray
NCU00520	-1.48522		0.000560027	gray
NCU00522	0.834898		-0.0289601	gray
NCU00523	0.0739302		-0.17325	gray
NCU00524	-1.23427		0.15539	gray
NCU00525	-1.4431		-0.08161	gray
NCU00526	-3.54748		0.0764801	gray
NCU00527	0.354478		-0.07041	gray
NCU00528	-0.298789		-0.07405	gray
NCU00529	0		-0.19756	gray
NCU00532	-0.0162652		0.06505	gray
NCU00533	-3.54276		0.19936	gray
NCU00534	-0.779899		-0.18526	gray
NCU00535	1.61382		-0.25888	gray
NCU00536	0.270072		-0.03332	gray
[truncated: 7,587 more rows]
