# Supplementary material for: The ACF chromatin-remodeling complex is essential for Polycomb repression
Source: eLife. 2022 Mar 8;11:e77595. doi: 10.7554/eLife.77595 (PMC9038196; doi:10.7554/eLife.77595)
Supplement: Figure 5—source data 1. [file elife-77595-fig5-data1.xlsx]

## Sheet: H3K27me SD genes
1: shifted 10 ~ 100bp
0: shift is not 10 ~ 100bp range
	H3K27me enrich & SD enriched genes
gene	iswi	acf1	iaf-3	iaf-1	iaf-2	set-7
NCU02196	1	1	1	0	0	0
NCU02867	0	0	0	0	0	0
NCU03474	0	0	0	0	1	1
NCU03476	1	1	0	0	0	0
NCU03582	1	1	1	1	1	1
NCU04689	0	0	0	0	0	0
NCU04690	0	0	0	1	1	0
NCU04694	0	0	1	0	1	0
NCU04695	1	1	1	0	0	0
NCU04697	1	0	0	0	0	0
NCU04706	0	0	1	0	0	0
NCU04710	0	0	0	0	0	0
NCU04852	0	0	0	0	0	0
NCU04862	0	1	0	0	0	0
NCU04865	0	1	0	0	0	0
NCU04871	0	0	0	0	0	0
NCU04874	0	1	1	0	0	0
NCU04876	1	0	0	0	0	0
NCU04877	1	0	0	0	0	1
NCU04881	0	1	0	0	0	0
NCU04884	0	0	0	0	1	1
NCU04886	1	1	1	1	1	0
NCU04887	0	1	0	0	1	1
NCU04896	0	0	0	0	0	0
NCU04897	0	1	0	0	1	1
NCU04901	1	0	1	1	0	0
NCU04908	1	1	0	0	0	1
NCU04910	1	1	0	0	0	1
NCU04912	0	1	0	0	0	0
NCU04914	0	1	1	0	1	0
NCU04922	0	0	0	0	0	0
NCU04923	1	0	0	1	1	0
NCU04926	0	0	0	0	0	0
NCU04928	0	0	0	0	0	1
NCU04934	0	0	0	0	0	0
NCU04935	0	0	0	0	0	0
NCU04937	0	1	0	0	0	0
NCU04938	1	1	0	1	0	0
NCU04949	0	0	0	0	1	0
NCU04950	1	0	0	1	0	1
NCU04951	1	1	0	1	0	0
NCU04991	0	1	0	0	0	0
NCU04992	1	1	0	0	0	0
NCU04994	0	0	0	0	0	0
NCU04997	0	1	1	1	1	1
NCU05000	0	0	0	0	1	0
NCU05049	1	1	0	0	0	0
NCU05057	0	0	0	0	0	0
NCU05058	0	0	0	0	0	0
NCU05059	0	0	0	0	0	0
NCU05061	0	0	0	0	0	0
NCU05069	1	0	1	0	0	0
NCU05070	1	1	0	1	0	0
NCU05071	1	0	0	0	1	0
NCU05074	1	1	0	0	0	0
NCU05079	0	1	0	1	0	1
NCU05080	1	1	1	1	0	0
NCU05082	0	0	0	1	0	0
NCU05083	0	1	0	0	0	0
NCU05089	1	0	0	0	0	1
NCU05092	1	0	0	0	0	0
NCU05093	0	1	0	0	0	0
NCU05107	0	0	0	1	0	0
NCU05108	1	1	0	0	0	0
NCU05113	1	1	1	0	0	0
NCU05131	1	1	1	0	0	0
NCU05154	1	0	0	0	0	0
NCU05155	0	0	0	0	0	0
NCU05156	0	0	0	0	0	0
NCU05157	0	0	0	0	0	0
NCU05158	0	0	0	0	0	0
NCU05159	1	1	0	0	0	0
NCU05160	1	1	1	0	0	1
NCU05163	0	1	1	1	1	1
NCU05164	1	1	0	1	0	0
NCU05171	0	0	0	0	0	0
NCU05172	0	0	0	0	0	1
NCU05173	0	0	1	0	0	0
NCU05175	0	0	0	0	1	0
NCU05176	1	1	0	0	0	0
NCU05183	1	0	0	0	0	0
NCU05184	1	1	0	0	0	0
NCU05186	0	0	1	1	1	0
NCU05189	0	0	0	0	0	0
NCU05191	1	1	0	1	1	1
NCU05462	0	0	0	0	0	0
NCU05463	0	1	0	0	0	0
NCU05657	0	0	0	0	0	0
NCU05658	0	0	1	0	1	1
NCU05659	0	0	0	0	0	0
NCU05661	1	1	1	0	1	0
NCU05662	1	1	0	0	0	0
NCU05663	0	0	0	0	0	0
NCU05886	0	0	0	0	0	0
NCU05887	0	1	1	0	1	0
NCU05888	0	1	0	0	0	0
NCU05897	1	1	1	0	0	0
NCU05899	1	1	0	0	0	0
NCU05900	0	0	0	0	0	0
NCU05906	1	0	0	0	0	0
NCU05907	1	1	0	0	0	0
NCU05908	0	1	1	0	0	0
NCU05909	0	0	0	0	1	0
NCU05914	0	0	0	0	0	0
NCU05918	1	0	1	1	0	0
NCU05919	1	1	1	1	0	1
NCU05920	1	1	0	1	1	1
NCU05921	1	0	1	0	1	1
NCU06155	0	0	0	0	0	0
NCU06159	0	0	0	0	0	0
NCU06901	0	0	0	0	0	0
NCU06902	0	1	1	1	0	0
NCU07049	0	0	0	0	0	0
NCU07054	0	0	0	0	1	0
NCU07088	1	0	0	0	0	0
NCU07089	0	0	0	0	0	0
NCU07094	1	0	0	0	0	0
NCU07095	0	0	0	1	0	0
NCU07102	0	1	1	1	1	1
NCU07105	0	0	0	0	0	0
NCU07106	0	0	0	0	0	0
NCU07111	1	1	0	1	1	1
NCU07119	0	0	0	0	0	0
NCU07130	0	0	0	0	0	1
NCU07132	0	0	1	0	1	0
NCU07133	0	0	0	0	0	0
NCU07134	0	0	0	0	0	0
NCU07136	0	0	0	0	0	0
NCU07138	1	0	0	1	0	0
NCU07139	0	0	1	0	0	1
NCU07140	0	0	0	0	0	0
NCU07142	1	1	0	0	0	0
NCU07143	1	1	0	0	0	0
NCU07144	1	1	0	0	0	1
NCU07147	0	1	1	1	0	1
NCU07148	1	1	0	0	0	0
NCU07150	0	1	1	0	0	0
NCU07151	0	0	0	0	0	0
NCU07161	1	1	1	1	1	1
NCU07162	0	1	0	1	0	1
NCU07210	1	1	0	0	0	0
NCU07222	0	0	0	0	1	0
NCU07224	1	1	1	0	1	0
NCU07225	1	1	0	0	0	0
NCU07227	0	0	0	1	0	0
NCU07230	1	0	0	0	1	0
NCU07232	0	0	0	0	0	0
NCU07234	0	0	1	0	0	0
NCU07235	1	0	1	0	0	0
NCU07237	0	0	0	0	1	1
NCU07241	0	0	1	1	0	0
NCU07245	1	1	0	0	0	0
NCU07480	0	0	0	0	1	0
NCU07581	1	0	1	0	0	0
NCU07597	0	0	1	0	0	0
NCU07601	1	0	1	0	0	1
NCU07602	0	0	0	0	0	0
NCU07618	0	0	0	0	0	0
NCU07620	1	1	1	0	0	0
NCU07622	1	1	0	0	0	1
NCU07624	0	0	1	1	0	0
NCU07626	1	0	0	0	0	0
NCU07634	0	0	0	0	0	0
NCU07635	0	0	1	0	0	0
NCU07636	1	1	0	0	0	1
NCU07638	1	1	1	1	1	0
NCU07651	0	0	1	1	1	1
NCU07653	0	1	1	0	0	0
NCU08059	0	0	0	0	0	0
NCU08073	0	1	1	1	1	1
NCU08075	1	0	0	0	0	0
NCU08076	1	1	0	0	0	0
NCU08079	1	1	1	0	0	1
NCU08080	0	0	0	1	1	0
NCU08081	0	1	0	1	0	0
NCU08083	0	0	0	0	0	0
NCU08084	0	0	0	0	0	0
NCU08085	0	0	0	0	0	0
NCU08089	1	1	1	1	0	1
NCU08095	0	1	0	0	0	0
NCU08097	0	0	0	0	0	0
NCU08102	0	0	1	1	1	1
NCU08103	0	0	0	0	0	0
NCU08186	1	1	1	0	0	1
NCU08188	1	0	1	1	1	1
NCU08192	0	0	1	1	0	0
NCU08206	1	1	1	1	1	0
NCU08223	1	0	0	1	0	0
NCU08225	0	0	0	0	1	0
NCU08226	1	1	0	0	0	0
NCU08232	0	1	0	0	1	0
NCU08238	1	0	0	0	0	0
NCU08239	0	0	1	1	1	1
NCU08240	0	1	0	0	0	0
NCU08241	0	1	0	0	0	0
NCU08248	0	0	0	0	0	0
NCU08250	1	1	1	0	1	0
NCU08256	0	0	0	0	0	0
NCU08257	0	0	0	0	0	0
NCU08261	1	0	1	0	0	0
NCU08431	0	0	0	0	0	0
NCU08522	1	0	1	1	1	1
NCU08524	1	1	1	1	1	1
NCU08530	0	0	0	1	0	0
NCU08532	1	0	0	0	0	0
NCU08537	1	1	0	0	0	1
NCU08538	1	0	0	0	0	0
NCU08541	0	0	1	1	0	0
NCU08542	0	0	1	0	1	1
NCU08544	0	0	0	0	0	1
NCU08545	0	0	0	0	0	0
NCU08546	1	1	1	1	1	1
NCU08547	0	1	0	0	0	0
NCU08549	1	1	0	0	0	0
NCU08570	0	0	1	0	0	0
NCU08571	0	0	0	0	0	1
NCU08572	1	0	1	0	1	0
NCU08576	0	0	0	1	1	0
NCU08635	0	0	1	0	1	0
NCU08638	0	0	1	0	0	1
NCU08640	0	0	0	0	0	1
NCU08641	0	0	0	1	0	0
NCU08753	0	0	0	0	0	0
NCU08755	1	1	0	0	1	1
NCU08763	0	0	0	1	0	0
NCU08764	1	1	1	0	0	0
NCU08768	0	0	0	0	0	0
NCU08769	0	1	0	0	0	0
NCU08770	0	0	0	0	0	0
NCU08784	1	1	0	0	1	1
NCU08790	1	1	0	0	0	0
NCU08795	0	0	0	0	0	0
NCU08797	0	0	0	0	0	0
NCU08812	0	0	0	0	0	0
NCU08836	1	1	1	1	1	0
NCU08865	0	0	0	0	0	0
NCU08881	1	1	1	1	1	1
NCU08883	1	1	0	0	1	0
NCU08885	0	1	0	1	1	0
NCU08907	1	0	0	0	0	0
NCU08912	0	0	0	1	0	0
NCU08918	0	1	0	1	1	0
NCU09026	0	0	0	0	0	0
NCU09149	1	1	0	1	0	0
NCU09151	1	1	0	0	0	0
NCU09164	0	0	0	0	0	0
NCU09165	1	1	1	1	0	0
NCU09173	0	0	0	0	0	0
NCU09176	0	0	0	0	0	0
NCU09178	0	1	1	1	0	1
NCU09179	1	0	0	0	0	1
NCU09181	0	0	0	0	0	0
NCU09182	0	0	0	0	0	0
NCU09183	1	1	0	0	0	0
NCU09184	0	0	0	0	0	0
NCU09185	0	0	0	0	1	0
NCU09186	1	1	0	0	0	0
NCU09277	0	0	1	1	1	1
NCU09278	0	0	0	0	1	0
NCU09293	0	0	0	0	0	0
NCU09306	1	1	0	0	0	1
NCU09339	1	1	0	1	1	0
NCU09431	1	0	1	0	0	0
NCU09455	1	0	1	0	0	1
NCU09456	0	0	0	0	0	0
NCU09484	0	1	1	1	1	0
NCU09486	1	1	0	0	0	0
NCU09495	1	1	1	0	1	1
NCU09506	0	1	0	0	1	1
NCU09520	1	1	0	0	0	0
NCU09523	0	0	0	0	0	0
NCU09524	1	1	0	0	0	1
NCU09525	0	0	0	0	0	0
NCU09526	0	0	0	0	0	0
NCU09579	1	1	0	1	0	0
NCU09619	0	0	1	1	0	0
NCU09627	0	0	0	1	1	0
NCU09629	0	0	0	0	0	0
NCU09630	0	1	0	0	0	1
NCU09631	0	0	0	0	0	0
NCU09632	0	0	0	0	0	0
NCU09633	1	0	0	1	0	0
NCU09634	0	0	0	0	0	0
NCU09635	1	0	1	1	0	1
NCU09637	0	0	0	1	0	0
NCU09639	1	0	1	1	1	1
NCU09641	0	0	0	0	0	0
NCU09652	1	0	0	1	0	1
NCU09698	1	0	1	1	0	0
NCU09724	0	0	0	0	0	0
NCU09725	0	1	1	0	0	0
NCU09838	0	0	0	0	0	0
NCU09839	0	1	0	1	0	1
NCU09855	0	0	0	0	0	0
NCU09856	0	0	1	0	0	0
NCU09857	1	1	0	0	0	0
NCU09901	0	0	0	0	0	0
NCU09904	0	0	1	0	0	1
NCU09906	0	0	0	0	0	1
NCU09909	1	0	1	0	0	0
NCU09914	0	0	0	1	0	0
NCU09947	0	0	1	0	0	1
NCU09952	0	0	0	0	0	0
NCU09953	1	0	0	0	1	0
NCU09954	0	0	0	0	0	0
NCU09956	0	0	1	0	0	1
NCU09958	0	0	0	0	0	0
NCU09959	0	0	0	0	0	0
NCU09964	0	0	0	0	0	0
NCU09966	0	0	0	0	0	1
NCU09988	1	1	0	1	0	0
NCU09990	1	1	1	0	0	0
NCU10005	0	0	0	0	0	0
NCU10030	0	0	1	1	0	1
NCU10037	1	1	0	0	0	0
NCU10038	1	1	0	0	0	0
NCU10055	1	1	0	0	0	0
NCU10070	1	0	0	0	1	0
NCU10129	1	0	0	0	0	1
NCU10501	0	0	0	0	0	0
NCU10538	1	0	1	1	0	0
NCU10572	0	1	0	0	0	0
NCU10629	0	0	0	0	0	0
NCU10641	0	0	1	0	0	1
NCU10644	0	0	0	0	0	0
NCU10766	1	1	1	1	0	0
NCU11134	0	0	0	0	0	0
NCU11291	0	0	1	0	0	0
NCU11292	0	1	0	0	0	0
NCU11341	1	0	0	0	0	1
NCU11365	0	1	1	0	0	1
NCU11409	1	1	0	0	0	0
NCU11424	0	0	0	0	0	0
NCU12045	0	0	0	1	1	1
NCU12050	0	1	1	0	0	0
NCU12051	1	0	0	1	0	0
NCU12052	0	0	0	0	0	0
NCU12065	0	1	0	0	0	1
NCU12075	0	0	0	0	0	0
NCU16305	1	1	0	1	0	1
NCU16600	0	1	0	0	0	1
NCU16611	0	0	0	0	0	1
NCU16723	0	1	0	0	0	0
NCU16724	1	0	1	1	0	0
NCU16738	1	0	1	1	0	1
NCU16742	0	1	0	0	0	0
NCU16906	0	1	0	0	0	0
NCU17041	0	0	0	0	0	0
NCU17044	1	0	0	0	0	0
NCU17053	0	0	0	0	1	0
NCU17055	0	0	0	0	1	0
NCU17066	0	0	0	0	0	0
NCU17137	0	0	0	0	0	0
NCU17143	0	0	0	0	0	1
NCU17180	1	1	0	1	1	0
NCU17181	0	0	1	1	0	0
NCU17264	0	0	1	0	1	1
NCU17283	1	0	0	0	0	0

## Sheet: All SD genes
1: shifted 10 ~ 100bp
0: shift is not 10 ~ 100bp range
	SD enriched genes
gene	iswi	acf1	iaf-3	iaf-1	iaf-2	set-7
NCU00003	1	0	1	0	0	0
NCU00004	0	0	0	0	0	0
NCU00006	1	1	1	1	1	1
NCU00007	1	0	1	1	1	0
NCU00008	0	1	0	0	0	0
NCU00010	0	0	0	0	0	0
NCU00011	0	0	0	0	0	0
NCU00013	0	1	1	1	1	1
NCU00014	1	1	0	0	0	0
NCU00015	0	0	0	0	0	0
NCU00017	0	0	0	0	1	1
NCU00018	0	0	0	0	0	1
NCU00019	0	0	0	0	0	0
NCU00021	0	0	0	0	0	0
NCU00022	0	1	0	0	0	0
NCU00023	1	1	0	0	0	0
NCU00024	0	0	0	0	1	1
NCU00025	0	0	0	0	0	0
NCU00026	1	0	0	0	1	0
NCU00027	0	0	0	0	0	0
NCU00028	0	0	0	0	0	0
NCU00029	0	1	0	1	1	0
NCU00030	1	1	1	1	1	1
NCU00031	0	0	0	0	0	0
NCU00032	0	0	0	0	0	0
NCU00033	1	1	0	1	1	1
NCU00034	1	1	0	0	0	1
NCU00035	1	1	1	1	1	0
NCU00037	1	1	1	1	1	1
NCU00038	1	1	0	0	0	0
NCU00039	1	0	0	0	0	0
NCU00040	0	1	0	0	0	0
NCU00041	0	1	0	0	0	0
NCU00042	0	0	0	0	0	0
NCU00043	1	0	0	0	0	0
NCU00045	0	0	0	0	0	0
NCU00046	0	0	0	1	0	0
NCU00047	0	0	0	0	1	0
NCU00048	0	1	0	1	1	1
NCU00050	0	0	0	0	0	0
NCU00051	0	0	0	0	0	1
NCU00056	1	0	1	1	1	1
NCU00057	1	1	1	1	1	0
NCU00059	0	1	0	0	0	0
NCU00060	0	0	0	0	0	0
NCU00064	0	0	0	0	0	0
NCU00065	0	0	0	0	0	0
NCU00066	1	1	1	1	0	0
NCU00067	0	1	0	0	0	0
NCU00068	1	0	0	0	0	0
NCU00069	0	0	0	0	0	0
NCU00070	1	0	1	1	1	1
NCU00072	1	1	0	0	0	0
NCU00073	1	0	0	1	1	1
NCU00075	0	0	1	1	0	0
NCU00076	1	0	0	0	0	1
NCU00077	0	0	0	0	0	0
NCU00078	1	1	0	0	0	0
NCU00079	0	1	0	0	0	1
NCU00080	0	0	0	1	0	1
NCU00081	0	0	0	0	0	0
NCU00082	0	0	1	1	1	0
NCU00083	0	0	1	1	1	0
NCU00084	1	1	0	0	0	0
NCU00085	0	0	0	0	0	0
NCU00086	0	0	1	0	0	0
NCU00087	0	0	0	0	0	0
NCU00088	1	0	1	1	1	0
NCU00089	0	0	0	1	0	0
NCU00090	1	0	1	0	1	0
NCU00091	0	0	0	0	0	0
NCU00092	0	0	0	0	0	0
NCU00093	1	1	1	0	1	0
NCU00095	0	1	0	0	0	0
NCU00096	0	1	0	0	0	0
NCU00097	0	0	0	1	1	1
NCU00100	1	1	0	0	0	0
NCU00101	0	0	0	0	0	0
NCU00102	0	0	0	0	1	0
NCU00103	1	1	1	1	0	0
NCU00104	1	0	0	0	0	0
NCU00105	0	0	0	0	0	0
NCU00106	0	0	0	0	0	0
NCU00107	0	0	0	0	0	0
NCU00108	0	0	0	0	0	0
NCU00109	0	1	1	1	1	1
NCU00110	0	0	0	0	0	0
NCU00111	1	0	0	0	0	0
NCU00112	1	1	0	0	0	0
NCU00114	0	0	0	1	0	1
NCU00115	0	0	0	0	0	0
NCU00116	0	0	0	0	0	0
NCU00117	0	0	0	0	0	0
NCU00118	1	0	0	0	0	0
NCU00119	0	0	0	0	0	0
NCU00120	0	0	0	0	0	0
NCU00121	0	0	0	0	0	1
NCU00123	0	0	0	1	1	0
NCU00124	1	0	1	1	1	0
NCU00125	0	0	0	0	0	0
NCU00126	0	1	0	0	0	0
NCU00127	0	1	0	0	1	1
NCU00128	0	0	0	0	0	0
NCU00129	0	0	0	0	0	0
NCU00132	0	0	0	0	1	1
NCU00133	0	1	0	0	0	0
NCU00134	0	0	0	0	0	0
NCU00135	0	1	0	0	0	1
NCU00136	1	1	1	0	0	0
NCU00137	0	0	0	0	0	0
NCU00138	0	0	0	0	0	0
NCU00142	0	0	1	1	0	0
NCU00143	1	0	0	0	1	0
NCU00144	0	0	0	0	0	0
NCU00145	1	1	1	1	1	0
NCU00146	0	0	1	0	0	0
NCU00147	0	0	0	0	0	0
NCU00148	0	0	1	0	0	0
NCU00149	0	0	0	0	1	1
NCU00150	1	1	1	1	1	0
NCU00151	0	0	0	0	0	0
NCU00153	0	0	1	0	0	0
NCU00154	0	0	0	0	0	0
NCU00155	1	1	1	1	1	0
NCU00157	1	0	0	0	0	1
NCU00158	1	1	1	1	0	1
NCU00159	0	1	0	1	0	0
NCU00160	0	0	0	0	0	0
NCU00161	1	1	0	0	1	0
NCU00162	1	1	1	0	1	0
NCU00163	0	0	0	0	0	0
NCU00164	0	1	0	0	0	0
NCU00167	1	1	0	1	1	1
NCU00168	0	0	0	1	1	1
NCU00169	0	1	0	0	0	0
NCU00170	0	1	0	0	0	1
NCU00171	0	1	0	0	0	0
NCU00172	0	0	0	0	0	0
NCU00173	0	0	0	1	0	0
NCU00175	0	0	1	1	1	1
NCU00176	0	0	0	0	0	0
NCU00177	1	1	0	0	0	0
NCU00178	0	0	0	0	0	0
NCU00179	0	0	0	0	0	0
NCU00180	0	1	0	0	0	0
NCU00181	0	1	0	0	0	0
NCU00182	0	1	0	0	0	0
NCU00183	1	0	1	1	1	0
NCU00184	1	0	0	0	0	0
NCU00186	1	0	0	0	0	0
NCU00187	1	0	0	0	0	0
NCU00188	0	0	0	0	0	0
NCU00189	0	1	1	1	0	0
NCU00193	0	0	0	0	0	0
NCU00194	0	0	0	0	0	0
NCU00195	0	0	0	0	0	0
NCU00196	1	1	1	1	1	0
NCU00197	0	1	0	0	0	1
NCU00198	1	1	0	0	0	1
NCU00199	0	1	0	0	0	0
NCU00200	1	0	1	1	1	1
NCU00202	0	0	1	1	1	0
NCU00203	1	1	1	1	0	0
NCU00204	0	1	0	0	0	1
NCU00205	1	1	0	0	0	0
NCU00206	0	0	0	1	0	1
NCU00207	1	0	0	0	0	0
NCU00209	0	0	1	0	1	0
NCU00210	0	1	0	0	1	1
NCU00211	0	0	0	0	0	0
NCU00213	0	0	0	1	0	0
NCU00214	1	1	0	0	0	0
NCU00218	0	1	0	1	1	1
NCU00219	0	1	0	1	0	0
NCU00220	0	0	0	0	0	0
NCU00223	0	0	0	0	0	0
NCU00224	1	0	1	1	1	0
NCU00225	0	0	0	0	0	0
NCU00226	0	0	0	0	0	0
NCU00227	0	0	0	0	0	0
NCU00229	0	0	0	0	0	0
NCU00230	0	0	1	1	1	0
NCU00232	0	0	1	0	0	0
NCU00233	0	0	1	1	0	1
NCU00234	0	1	0	0	0	0
NCU00236	0	1	0	1	1	1
NCU00237	0	0	1	1	0	0
NCU00238	0	0	0	0	0	0
NCU00239	1	1	0	0	0	0
NCU00242	0	1	1	0	0	0
NCU00243	0	0	1	0	0	0
NCU00244	0	0	0	0	0	1
NCU00245	0	0	0	0	0	0
NCU00246	0	0	0	0	0	0
NCU00247	0	1	0	0	0	1
NCU00248	1	0	0	1	0	0
NCU00249	0	0	0	0	0	0
NCU00250	0	1	1	0	0	0
NCU00251	0	0	0	0	0	1
NCU00252	1	1	0	0	0	0
NCU00253	1	0	1	1	0	1
NCU00257	0	0	0	0	1	0
NCU00258	0	0	0	0	0	0
NCU00259	1	1	0	0	0	0
NCU00260	0	1	1	1	1	1
NCU00261	1	0	1	1	1	1
NCU00263	0	1	0	1	0	0
NCU00264	0	0	0	0	0	1
NCU00265	0	0	0	0	0	0
NCU00268	0	0	0	0	0	0
NCU00269	1	0	1	1	0	1
NCU00270	0	0	1	0	0	0
NCU00271	0	0	0	0	0	0
NCU00272	0	0	0	0	0	0
NCU00273	0	1	0	0	0	0
NCU00274	0	0	0	0	0	0
NCU00275	0	1	0	0	0	0
NCU00276	0	0	0	0	0	0
NCU00277	0	1	0	0	0	0
NCU00278	0	0	0	0	0	0
NCU00279	0	0	0	0	0	0
NCU00280	0	0	0	0	0	0
NCU00281	0	0	0	0	0	0
NCU00282	0	0	0	0	0	0
NCU00284	0	1	0	0	0	0
NCU00285	0	0	1	1	0	0
NCU00287	1	1	1	1	1	1
NCU00288	0	0	0	0	0	0
NCU00289	0	0	0	0	0	0
NCU00290	0	0	0	0	0	0
NCU00291	0	0	0	0	0	0
NCU00292	0	0	0	1	0	0
NCU00293	1	1	1	0	1	1
NCU00294	0	0	1	0	0	0
NCU00295	1	1	0	0	0	0
NCU00296	0	1	1	0	1	0
NCU00298	0	0	0	0	0	0
NCU00299	1	1	0	0	0	0
NCU00300	1	0	0	1	0	1
NCU00301	0	1	0	1	0	1
NCU00302	0	1	0	0	0	0
NCU00303	0	0	0	0	0	0
NCU00304	1	0	0	0	0	0
NCU00305	1	1	0	0	0	0
NCU00306	1	1	0	1	0	1
NCU00307	0	0	0	0	0	0
NCU00308	1	0	0	0	0	0
NCU00309	1	1	0	1	0	1
NCU00310	1	0	0	0	0	0
NCU00311	0	0	1	1	0	0
NCU00312	0	0	0	0	0	0
NCU00315	0	1	1	1	1	1
NCU00316	0	0	0	0	0	0
NCU00317	0	0	0	0	0	0
NCU00319	1	1	0	1	1	0
NCU00320	0	0	0	0	0	1
NCU00321	0	0	0	0	0	0
NCU00322	0	0	0	0	0	0
NCU00324	1	1	1	0	0	0
NCU00325	0	0	0	0	0	0
NCU00326	0	0	0	0	0	0
NCU00327	0	0	0	0	0	0
NCU00329	1	1	1	1	1	0
NCU00330	0	0	0	1	1	1
NCU00331	0	0	0	0	0	0
NCU00332	1	1	0	0	0	0
NCU00333	0	0	0	0	0	0
NCU00334	0	0	0	1	0	0
NCU00335	1	0	0	0	0	0
NCU00336	0	0	0	1	0	0
NCU00337	0	1	0	1	0	1
NCU00339	0	1	1	1	1	0
NCU00340	0	0	0	0	0	0
NCU00344	0	0	0	0	0	0
NCU00345	0	1	0	0	0	1
NCU00346	0	0	0	0	0	0
NCU00347	1	0	1	1	1	0
NCU00348	1	1	0	0	0	1
NCU00349	0	0	0	0	0	0
NCU00350	1	1	1	1	0	0
NCU00351	1	1	1	1	1	0
NCU00352	1	1	0	1	1	0
NCU00354	0	0	0	0	0	0
NCU00356	1	1	0	0	1	0
NCU00357	1	0	0	1	0	0
NCU00359	0	0	0	0	0	0
NCU00360	0	0	0	0	0	1
NCU00361	0	0	0	0	0	0
NCU00362	0	0	0	0	0	0
NCU00364	1	0	0	0	0	0
NCU00365	0	1	0	0	0	0
NCU00366	0	0	0	0	0	0
NCU00368	1	1	1	1	0	0
NCU00369	1	1	0	0	0	0
NCU00371	0	1	0	0	0	0
NCU00372	0	0	0	0	0	0
NCU00373	0	0	1	1	1	0
NCU00375	1	1	1	0	0	0
NCU00376	0	0	0	0	0	0
NCU00377	0	0	0	0	1	0
NCU00378	0	0	0	0	0	0
NCU00379	0	0	0	0	0	0
NCU00380	0	1	0	1	1	1
NCU00382	0	0	0	0	0	0
NCU00384	1	1	0	0	0	1
NCU00385	0	0	0	0	0	0
NCU00387	0	0	0	0	1	0
NCU00388	1	0	1	1	0	0
NCU00389	0	0	0	0	0	0
NCU00391	1	1	1	1	0	1
NCU00395	0	1	0	0	0	0
NCU00396	0	0	1	1	1	0
NCU00398	0	0	0	0	0	0
NCU00399	0	0	0	0	0	0
NCU00400	0	1	0	0	0	0
NCU00401	0	0	0	0	0	0
NCU00403	1	1	0	0	1	1
NCU00404	0	0	0	0	0	0
NCU00405	0	1	0	0	1	0
NCU00406	1	1	0	0	0	0
NCU00407	0	0	0	0	0	0
NCU00410	0	0	0	0	0	0
NCU00411	0	0	0	0	0	0
NCU00412	0	0	0	failed	0	0
NCU00413	0	0	0	0	0	0
NCU00414	0	0	0	0	0	0
NCU00415	0	0	0	0	0	0
NCU00416	0	1	0	0	0	0
NCU00417	0	0	0	0	0	0
NCU00418	0	1	0	0	0	0
NCU00419	0	0	0	0	0	0
NCU00421	0	0	0	0	0	1
NCU00422	0	0	0	0	0	0
NCU00423	0	0	1	1	1	0
NCU00424	0	1	0	1	1	0
NCU00425	0	0	1	1	0	0
NCU00426	1	1	0	0	0	0
NCU00427	0	0	1	0	0	0
NCU00428	0	0	1	1	0	0
NCU00430	1	1	0	0	0	1
NCU00431	1	0	0	0	0	0
NCU00432	0	0	0	0	0	0
NCU00434	0	0	0	0	0	0
NCU00435	1	0	0	1	0	0
NCU00436	0	0	0	0	0	0
NCU00437	0	0	0	1	0	0
NCU00438	1	0	1	1	1	1
NCU00439	0	0	0	0	1	0
NCU00440	1	0	1	0	0	0
NCU00441	0	1	1	0	0	0
NCU00442	1	0	1	1	0	0
NCU00443	0	1	0	0	0	1
NCU00444	0	0	0	0	0	0
NCU00446	0	1	1	1	1	0
NCU00447	1	1	1	1	1	1
NCU00448	0	0	1	1	1	1
NCU00450	1	0	0	0	1	0
NCU00451	0	0	0	0	1	0
NCU00453	0	1	0	0	0	0
NCU00454	1	1	1	1	1	0
NCU00455	0	1	0	0	0	0
NCU00457	0	0	0	1	1	0
NCU00458	1	1	0	0	0	1
NCU00459	0	1	0	1	1	1
NCU00461	0	0	1	1	1	0
NCU00462	0	0	1	1	0	1
NCU00463	0	0	0	0	0	0
NCU00464	0	1	0	0	0	1
NCU00465	0	0	0	0	0	0
NCU00466	0	0	1	0	0	0
NCU00467	0	1	0	0	0	0
NCU00468	0	0	0	0	0	0
NCU00469	0	0	0	0	0	0
NCU00470	1	1	0	0	1	1
NCU00471	1	0	0	0	0	0
NCU00472	0	1	1	0	0	0
NCU00473	0	0	0	1	1	1
NCU00474	1	0	0	1	1	0
NCU00475	0	0	0	0	0	0
NCU00476	0	1	0	1	1	1
NCU00477	0	0	0	0	0	0
NCU00478	0	0	0	0	0	1
NCU00480	0	0	1	1	0	0
NCU00481	0	0	0	0	0	0
NCU00483	0	0	0	0	0	0
NCU00484	0	0	0	0	0	0
NCU00485	0	0	0	0	0	0
NCU00486	1	1	0	0	0	0
NCU00488	0	0	0	0	0	1
NCU00489	0	0	0	0	0	0
NCU00492	0	0	0	0	0	1
NCU00493	0	1	0	0	0	1
NCU00494	0	0	0	0	0	0
NCU00495	0	0	0	0	0	1
NCU00496	0	0	0	1	1	0
NCU00497	0	0	0	0	0	0
NCU00498	0	0	0	0	0	0
NCU00499	0	0	0	0	0	0
NCU00501	0	0	0	0	0	0
NCU00502	0	0	1	0	0	0
NCU00503	0	1	0	0	0	0
NCU00505	0	0	0	0	0	0
NCU00506	1	0	1	0	0	0
NCU00510	1	1	1	0	0	1
NCU00512	0	1	0	0	0	0
NCU00513	0	0	0	0	0	0
NCU00515	1	1	0	1	0	1
NCU00516	0	0	1	0	0	0
NCU00517	0	0	0	0	0	0
NCU00518	0	0	0	1	0	0
NCU00519	0	0	0	0	0	0
NCU00520	0	0	0	0	0	0
NCU00521	0	0	0	0	0	1
NCU00522	1	1	1	1	1	0
NCU00526	1	1	1	0	0	1
NCU00527	0	0	0	0	0	0
NCU00528	0	0	0	0	0	0
NCU00529	0	0	0	0	0	0
NCU00534	0	0	0	0	0	0
NCU00535	0	1	1	0	0	0
NCU00536	1	0	1	0	0	1
NCU00537	1	0	0	0	0	0
NCU00538	0	0	0	0	0	0
NCU00541	1	0	0	0	0	1
NCU00542	1	0	0	0	1	0
NCU00545	0	0	0	0	0	1
NCU00548	1	1	1	0	1	1
NCU00549	0	0	1	0	1	1
NCU00550	0	1	0	0	0	0
NCU00551	0	0	0	0	0	0
NCU00552	1	0	0	0	1	1
NCU00553	1	1	0	0	0	0
NCU00556	0	0	0	0	0	0
NCU00557	0	0	0	0	0	0
NCU00558	0	0	0	1	0	1
NCU00559	0	0	0	0	0	0
NCU00560	0	0	0	0	0	0
NCU00561	1	1	1	1	1	1
NCU00562	0	0	0	0	0	0
NCU00563	1	1	0	0	0	0
NCU00564	0	1	1	0	0	0
NCU00565	0	0	1	0	0	0
NCU00566	0	0	0	0	0	0
NCU00567	1	0	1	1	1	1
NCU00568	1	1	0	0	0	1
NCU00569	1	1	0	0	1	0
NCU00570	0	0	0	0	0	0
NCU00571	1	1	0	0	0	0
NCU00572	0	0	1	0	1	1
NCU00575	1	1	1	1	0	1
NCU00576	0	1	0	0	0	0
NCU00577	0	0	0	0	0	0
NCU00578	0	0	0	0	0	0
NCU00579	1	1	0	0	0	1
NCU00580	0	0	0	1	0	0
NCU00581	1	0	1	0	1	0
NCU00582	0	0	0	0	0	0
NCU00583	0	1	0	0	0	0
NCU00584	0	0	0	0	1	0
NCU00585	1	0	0	1	0	1
NCU00586	0	0	0	0	0	0
NCU00587	0	0	0	0	0	0
NCU00589	0	1	1	1	0	0
NCU00590	0	0	0	0	1	0
NCU00591	1	1	0	0	0	0
NCU00595	0	0	0	0	1	0
NCU00596	0	0	0	0	0	0
NCU00597	1	0	0	0	0	0
NCU00598	1	1	1	1	1	0
NCU00599	0	0	0	0	0	0
NCU00600	0	0	0	0	0	0
NCU00602	1	1	1	1	1	0
NCU00603	1	1	1	1	0	1
NCU00604	0	1	1	0	0	0
NCU00605	0	0	0	0	0	0
NCU00606	0	0	0	0	0	0
NCU00607	1	0	1	1	0	1
NCU00608	0	0	0	0	0	0
NCU00609	0	0	0	0	1	1
NCU00611	0	0	0	0	0	0
NCU00614	0	1	0	0	0	1
NCU00616	0	0	1	0	0	0
NCU00617	0	1	0	0	0	0
NCU00618	0	0	1	1	0	1
NCU00619	1	0	0	0	0	1
NCU00620	1	0	1	1	0	0
NCU00621	0	1	0	0	0	1
NCU00622	0	0	0	0	0	0
NCU00623	0	0	0	1	0	0
NCU00624	0	0	1	0	0	1
NCU00627	1	0	0	0	0	0
NCU00628	0	1	0	0	0	0
NCU00629	0	0	0	0	0	0
NCU00630	0	1	0	0	1	1
NCU00631	0	0	0	0	0	0
NCU00632	0	0	0	0	0	0
NCU00633	0	0	0	0	1	1
NCU00634	0	0	0	0	0	0
NCU00635	0	0	0	0	0	1
NCU00636	0	0	0	1	0	0
NCU00638	0	0	0	0	0	0
NCU00640	0	0	0	1	0	0
NCU00641	1	0	0	0	0	0
NCU00642	1	0	0	1	0	0
NCU00643	1	1	1	0	0	0
NCU00644	0	1	0	0	0	0
NCU00645	1	1	1	0	0	0
NCU00649	1	1	0	1	1	0
NCU00650	0	0	0	0	0	0
NCU00651	0	1	0	1	0	1
NCU00653	0	1	0	0	0	0
NCU00654	1	0	0	0	0	0
NCU00655	0	0	0	1	1	1
NCU00656	1	0	0	0	0	0
NCU00657	0	1	0	0	0	0
NCU00660	0	0	0	0	0	0
NCU00662	0	0	0	0	0	0
NCU00663	0	1	0	0	0	1
NCU00664	0	0	0	0	0	0
NCU00665	0	0	0	0	0	0
NCU00666	0	0	0	0	0	0
NCU00667	0	0	0	0	0	0
NCU00668	0	1	0	0	0	0
NCU00669	0	0	1	0	0	0
NCU00670	0	0	0	0	0	0
NCU00671	0	0	0	1	0	0
NCU00673	0	0	0	1	1	0
NCU00674	0	1	0	1	1	0
NCU00675	1	1	0	0	0	0
NCU00676	0	0	0	0	0	0
NCU00677	0	0	0	0	0	0
NCU00678	1	1	0	0	0	0
NCU00680	0	0	0	0	0	0
NCU00681	1	1	1	0	1	0
NCU00682	1	0	0	1	0	0
NCU00685	0	0	0	0	0	0
NCU00687	0	0	0	0	0	1
NCU00689	0	0	0	0	0	1
NCU00690	0	0	0	0	0	0
NCU00691	0	0	0	0	0	0
NCU00692	0	1	0	0	0	0
NCU00693	1	1	1	1	1	1
NCU00694	1	1	1	1	1	1
NCU00696	0	1	0	0	1	0
NCU00698	1	0	1	1	0	0
NCU00699	1	0	1	1	1	0
NCU00700	1	1	0	0	0	0
NCU00701	0	0	0	0	0	0
NCU00705	0	0	0	1	1	0
NCU00706	0	0	0	0	0	0
NCU00707	0	0	0	0	0	0
NCU00710	1	1	0	0	0	0
NCU00711	0	0	0	0	0	0
NCU00712	0	1	1	0	0	0
NCU00713	0	1	0	0	0	0
NCU00714	0	0	0	0	0	0
NCU00715	1	1	0	1	1	1
NCU00716	1	0	0	1	1	1
NCU00717	0	0	1	0	1	0
NCU00720	0	1	1	1	1	0
NCU00721	0	0	1	0	1	0
NCU00722	0	0	1	0	0	0
NCU00723	0	0	0	1	0	0
NCU00724	0	0	0	0	0	0
NCU00725	0	0	0	0	0	0
NCU00726	0	0	0	0	0	0
NCU00727	0	1	0	0	0	0
NCU00730	1	0	1	0	0	0
NCU00732	1	1	0	0	1	0
NCU00733	0	0	1	0	0	0
NCU00734	0	0	0	0	0	0
NCU00735	0	0	0	0	0	0
NCU00736	0	0	0	0	0	0
NCU00737	0	1	0	0	1	0
NCU00738	0	0	0	1	1	0
NCU00740	0	0	0	0	0	0
NCU00741	0	0	0	0	0	0
NCU00742	1	1	1	1	0	0
NCU00743	0	0	0	0	0	0
NCU00744	1	0	0	1	0	0
NCU00748	0	1	1	1	1	1
NCU00749	0	0	1	1	1	0
NCU00753	1	1	0	1	0	1
NCU00754	0	0	0	0	1	0
NCU00755	0	0	0	0	0	1
NCU00756	0	0	0	0	0	0
NCU00758	0	0	0	0	0	0
NCU00759	0	0	0	0	0	0
NCU00760	0	0	0	0	0	0
NCU00761	1	1	1	0	0	0
NCU00762	1	1	0	0	0	0
NCU00768	0	0	0	0	0	0
NCU00770	0	0	0	0	0	0
NCU00771	0	0	1	1	0	0
NCU00772	1	1	1	0	1	1
NCU00775	0	0	0	0	0	0
NCU00777	0	1	1	1	1	0
NCU00778	0	0	1	0	0	0
NCU00780	0	1	0	0	0	0
NCU00782	0	0	0	0	1	1
NCU00783	0	0	0	0	0	1
NCU00784	0	0	1	0	0	0
NCU00786	0	1	0	0	1	1
NCU00787	0	1	0	1	0	0
NCU00788	0	1	0	1	1	0
NCU00789	0	0	0	0	0	0
NCU00793	0	1	0	0	0	0
NCU00794	0	0	0	0	0	0
NCU00796	0	0	0	1	0	1
NCU00797	1	0	0	1	0	0
NCU00799	0	0	0	0	0	0
NCU00800	0	0	0	0	0	0
NCU00801	1	1	0	1	0	0
NCU00802	1	1	0	0	0	0
NCU00803	0	0	0	0	0	0
NCU00804	0	0	0	0	0	0
NCU00805	0	0	0	0	0	0
NCU00806	1	0	0	0	0	0
NCU00807	0	0	0	0	0	1
NCU00808	0	0	1	1	0	1
NCU00809	0	0	0	0	0	0
NCU00810	0	1	0	0	0	0
NCU00811	0	0	1	1	1	0
NCU00812	1	1	0	0	0	1
NCU00813	0	1	0	0	1	0
NCU00814	1	1	0	0	0	1
NCU00818	1	1	0	0	0	1
NCU00819	0	0	1	0	0	1
NCU00823	0	1	0	0	0	1
NCU00824	0	1	0	0	0	0
NCU00826	0	0	0	0	0	0
NCU00827	0	0	1	0	0	0
NCU00829	0	0	0	0	0	0
NCU00830	1	1	1	1	1	1
NCU00831	0	0	1	0	1	0
NCU00833	0	1	0	0	0	0
NCU00834	1	1	0	1	0	0
NCU00835	0	0	0	0	0	0
NCU00836	0	0	0	0	1	0
NCU00838	0	0	0	1	0	1
NCU00842	0	0	0	0	0	0
NCU00843	0	1	0	0	0	0
NCU00846	0	0	0	0	0	0
NCU00847	0	0	1	1	1	1
NCU00848	0	0	0	0	0	1
NCU00851	0	1	0	0	0	0
NCU00853	0	0	0	0	0	0
NCU00854	1	0	0	1	1	1
NCU00856	1	1	0	0	0	0
NCU00859	1	1	0	0	0	0
NCU00860	0	1	0	0	0	0
NCU00862	1	1	0	0	1	0
NCU00863	1	1	0	0	0	0
NCU00864	0	0	0	0	0	0
NCU00865	0	1	0	1	0	0
NCU00866	1	1	0	1	1	1
NCU00867	0	0	0	0	0	0
NCU00868	1	0	0	0	0	0
NCU00870	0	0	0	0	0	0
NCU00872	0	0	0	0	0	0
NCU00873	0	0	0	0	1	0
NCU00874	0	0	0	1	1	0
NCU00876	0	0	0	0	1	1
NCU00877	1	1	0	0	0	1
NCU00878	0	1	1	1	1	0
NCU00879	0	0	0	0	0	0
NCU00880	0	0	0	0	0	0
NCU00881	0	1	0	0	0	0
NCU00882	1	1	1	1	1	1
NCU00884	0	0	0	0	0	0
NCU00885	0	0	0	0	0	0
NCU00887	0	0	0	0	0	0
NCU00889	0	0	0	0	0	0
NCU00890	0	0	0	0	0	0
NCU00891	0	0	0	0	0	0
NCU00892	1	1	1	0	0	0
NCU00893	1	0	0	0	0	0
NCU00894	0	1	0	0	0	0
NCU00895	0	0	0	0	0	0
NCU00896	0	0	0	0	0	1
NCU00897	1	1	1	1	0	1
NCU00898	1	1	0	0	0	0
NCU00899	0	0	0	0	0	0
NCU00900	0	1	1	0	0	1
NCU00901	0	0	0	0	0	0
NCU00902	0	0	0	0	0	0
NCU00903	1	1	0	1	0	0
NCU00904	0	0	0	0	0	0
NCU00905	1	0	0	0	0	0
NCU00906	0	1	0	0	0	1
NCU00907	1	1	1	1	1	0
NCU00911	1	0	0	0	0	0
NCU00912	1	0	0	0	0	0
NCU00913	1	0	0	0	0	0
NCU00914	0	1	0	0	0	0
NCU00915	0	0	0	0	1	0
NCU00916	0	0	0	0	0	0
NCU00917	1	0	0	0	0	0
NCU00918	0	0	0	1	0	0
NCU00919	0	0	0	0	0	0
NCU00920	0	0	0	0	0	0
NCU00921	0	1	0	0	0	0
NCU00922	0	0	0	0	0	0
NCU00923	1	0	0	1	1	0
NCU00924	0	1	0	0	0	1
NCU00925	1	0	0	0	0	0
NCU00927	1	0	0	0	0	0
NCU00928	0	0	1	0	0	1
NCU00929	1	1	0	1	0	1
NCU00930	1	1	0	0	0	0
NCU00931	0	0	0	0	1	0
NCU00934	1	1	0	1	1	0
NCU00936	0	1	1	1	1	0
NCU00937	1	0	0	0	1	0
NCU00938	0	1	0	0	0	0
NCU00939	0	0	0	0	0	1
NCU00940	0	1	0	0	1	1
NCU00941	0	0	0	0	0	0
NCU00943	1	0	0	0	0	0
NCU00944	0	0	0	0	0	0
NCU00945	0	0	0	1	0	1
NCU00946	0	0	0	0	0	0
NCU00947	0	0	0	0	0	0
NCU00948	0	0	0	0	0	0
NCU00949	1	0	1	0	0	1
NCU00950	1	0	1	1	1	0
NCU00951	1	1	1	1	1	1
NCU00954	0	0	0	0	0	0
NCU00955	0	0	0	0	0	0
NCU00956	0	0	0	0	0	0
NCU00957	1	0	1	1	0	1
NCU00958	0	1	0	1	0	0
NCU00959	1	1	1	1	0	0
NCU00960	1	1	1	1	0	1
NCU00961	0	0	0	0	0	0
NCU00962	1	1	1	1	1	0
NCU00963	0	0	0	0	0	0
NCU00964	1	1	1	1	1	1
NCU00965	0	1	1	1	1	1
NCU00966	0	0	0	0	0	0
NCU00967	1	1	0	0	0	0
NCU00968	0	0	0	0	0	0
NCU00969	0	1	0	0	1	0
NCU00970	0	0	0	0	0	0
NCU00971	0	0	0	0	0	0
NCU00972	1	1	0	1	0	1
NCU00973	0	1	0	1	0	1
NCU00974	1	1	0	0	0	0
NCU00978	0	1	1	1	0	1
NCU00979	0	0	0	0	0	0
NCU00980	0	0	0	0	0	0
NCU00981	0	0	0	0	0	0
NCU00983	0	0	0	1	1	0
NCU00984	1	1	0	0	0	0
NCU00985	1	0	0	0	0	0
NCU00986	0	0	1	1	0	0
NCU00987	0	1	0	0	1	1
NCU00988	1	1	1	1	0	1
NCU00989	0	0	0	0	0	0
NCU00992	1	1	0	0	0	0
NCU00993	1	1	0	0	0	0
NCU00994	0	0	0	0	0	0
NCU00995	1	0	1	0	0	1
NCU00998	0	0	0	0	0	0
NCU00999	0	0	0	0	0	0
NCU01001	1	1	0	0	0	0
NCU01002	0	0	0	0	0	0
NCU01003	0	0	0	0	0	0
NCU01004	0	0	0	0	0	1
NCU01005	0	0	0	0	0	0
NCU01006	0	0	0	0	0	0
NCU01007	0	0	0	0	0	0
NCU01008	0	0	0	0	0	0
NCU01010	1	0	0	0	0	0
NCU01011	1	0	1	0	1	1
NCU01012	1	0	1	0	1	0
NCU01013	1	0	0	1	0	1
NCU01015	1	0	1	0	0	1
NCU01016	1	0	0	1	1	0
NCU01017	1	0	1	0	0	0
NCU01019	0	0	0	0	0	0
NCU01021	0	1	0	0	0	0
NCU01022	1	1	0	0	0	0
NCU01023	0	0	1	0	0	0
NCU01024	1	0	1	0	0	0
NCU01026	0	0	0	0	0	0
NCU01027	1	1	1	0	0	0
NCU01032	1	0	0	1	1	1
NCU01034	0	0	1	1	0	0
NCU01036	1	0	1	1	0	0
NCU01038	0	0	0	0	0	0
NCU01039	0	1	0	1	0	0
NCU01041	0	0	0	0	0	0
NCU01044	0	1	1	1	0	1
NCU01047	1	0	1	1	0	0
NCU01048	0	0	0	0	0	0
NCU01053	0	0	0	0	0	0
NCU01054	1	0	0	0	0	1
NCU01055	0	0	0	0	0	0
NCU01056	1	0	0	0	0	0
NCU01057	1	1	0	0	0	0
NCU01059	1	1	0	0	0	0
NCU01060	0	1	0	0	1	1
NCU01063	0	1	0	1	1	0
NCU01064	1	1	1	1	1	1
NCU01065	0	0	0	0	0	1
NCU01067	1	1	0	0	0	0
NCU01068	1	0	0	0	0	0
NCU01069	0	1	1	0	1	0
NCU01070	0	0	0	0	0	0
NCU01074	0	0	1	0	0	0
NCU01075	0	0	0	0	0	0
NCU01076	0	0	0	0	1	0
NCU01078	0	0	1	1	1	1
NCU01080	0	0	0	0	0	0
NCU01081	0	0	0	0	0	0
NCU01083	0	0	0	0	0	0
NCU01084	0	0	1	0	1	0
NCU01085	0	0	0	0	0	0
NCU01088	0	0	0	0	0	0
NCU01089	0	0	0	0	0	0
NCU01091	1	0	1	1	0	0
NCU01092	1	0	0	0	0	0
NCU01093	1	1	1	1	1	0
NCU01094	1	1	0	0	0	0
NCU01096	0	1	0	0	0	0
NCU01097	0	0	0	0	0	0
NCU01098	0	1	0	0	0	0
NCU01100	1	1	0	1	1	1
NCU01101	0	1	0	0	0	0
NCU01102	0	1	0	0	0	0
NCU01104	0	1	0	0	0	0
NCU01105	0	0	1	0	0	0
NCU01106	0	1	0	1	0	1
NCU01107	1	1	0	0	0	0
NCU01108	0	0	0	1	1	1
NCU01109	1	0	0	1	0	1
NCU01113	0	0	1	0	0	1
NCU01114	0	0	0	0	0	0
NCU01115	0	0	0	0	0	0
NCU01116	1	1	1	1	1	1
NCU01118	0	0	0	0	0	0
NCU01119	0	1	1	1	0	0
NCU01120	0	0	0	0	0	0
NCU01121	0	0	0	0	0	0
NCU01122	0	1	1	0	0	1
NCU01123	0	1	0	0	0	0
NCU01124	0	0	0	0	0	0
NCU01127	1	1	0	1	0	0
NCU01134	0	1	0	1	0	0
NCU01135	1	0	1	1	0	0
NCU01136	1	1	0	0	0	0
NCU01138	0	1	1	1	0	0
NCU01140	0	0	0	0	0	0
NCU01141	0	1	0	0	0	0
NCU01142	1	0	0	0	0	0
NCU01143	1	1	1	1	1	1
NCU01144	1	1	0	0	0	0
NCU01145	0	1	0	0	0	0
NCU01146	0	0	0	0	0	0
NCU01149	1	1	1	1	1	0
NCU01150	1	1	0	0	1	1
NCU01153	0	1	0	0	0	0
NCU01154	0	0	1	0	0	0
NCU01156	0	0	0	0	0	0
NCU01157	1	1	1	1	1	1
NCU01158	0	0	0	1	1	1
NCU01159	0	0	0	0	0	0
NCU01160	1	0	1	0	1	1
NCU01161	0	1	0	0	1	0
NCU01162	0	0	0	0	0	0
NCU01163	1	1	0	0	0	0
NCU01164	1	0	0	1	0	1
NCU01165	0	0	0	0	0	0
NCU01166	0	1	0	0	0	0
NCU01167	0	0	0	1	0	1
NCU01169	0	1	0	0	0	1
NCU01170	0	0	0	0	0	0
NCU01171	0	1	0	0	0	0
NCU01172	1	1	1	1	1	1
NCU01173	0	1	0	0	0	0
NCU01174	0	0	0	0	0	0
NCU01175	0	0	0	0	0	0
NCU01176	0	0	0	0	0	0
NCU01177	1	0	0	0	0	0
NCU01178	0	0	1	0	0	1
NCU01179	0	1	0	0	0	1
NCU01180	0	1	0	0	0	0
NCU01181	0	0	0	0	0	0
NCU01182	0	0	0	0	0	0
NCU01183	1	0	1	1	0	0
NCU01184	0	0	0	0	0	0
NCU01185	0	1	0	0	1	1
NCU01186	0	0	1	0	0	0
NCU01187	1	1	1	0	1	1
NCU01189	1	1	0	0	1	0
NCU01190	0	0	0	0	0	0
NCU01191	1	0	0	0	0	0
NCU01192	0	0	0	0	0	0
NCU01193	0	0	0	0	0	0
NCU01195	0	0	0	0	0	0
NCU01196	0	0	1	0	0	0
NCU01197	0	1	0	0	0	0
NCU01198	0	0	0	1	0	0
NCU01199	0	0	0	0	0	0
NCU01200	0	0	1	0	0	0
NCU01202	0	0	0	0	0	0
NCU01203	0	0	0	0	0	0
NCU01204	0	1	0	1	1	1
NCU01205	0	0	1	0	1	0
NCU01206	0	1	0	0	0	0
NCU01207	0	0	0	0	0	0
NCU01208	0	1	0	0	0	0
NCU01209	1	0	1	1	1	1
NCU01211	0	0	0	0	0	0
NCU01212	1	0	1	1	0	0
NCU01213	0	0	1	1	0	0
NCU01215	1	0	1	0	0	0
NCU01216	1	0	0	0	0	0
NCU01219	0	0	0	0	0	0
NCU01220	0	0	0	0	0	1
NCU01221	0	0	0	0	0	0
NCU01224	1	0	1	1	0	0
NCU01225	0	0	0	0	0	0
NCU01227	1	1	1	1	1	1
NCU01229	0	0	0	0	0	0
NCU01230	0	0	1	1	0	0
NCU01231	0	0	0	0	0	0
NCU01233	0	0	1	0	1	0
NCU01234	0	0	0	0	0	0
NCU01235	0	1	0	1	0	0
NCU01236	0	0	0	0	0	0
NCU01238	0	1	1	1	1	1
NCU01240	0	0	1	1	0	0
NCU01241	0	0	0	0	0	0
NCU01242	1	1	1	1	1	1
NCU01243	1	0	0	0	0	1
NCU01245	0	0	0	0	0	0
NCU01246	0	0	0	0	0	0
NCU01247	0	0	0	0	0	0
NCU01248	0	0	0	0	1	0
NCU01249	1	1	0	0	1	1
NCU01250	1	0	0	0	0	0
NCU01252	0	0	0	0	0	1
NCU01253	0	1	0	0	0	0
NCU01254	0	0	0	0	0	0
NCU01255	0	1	0	0	0	0
NCU01256	1	0	1	1	1	0
NCU01257	0	0	0	0	0	0
NCU01258	0	0	1	1	1	1
NCU01259	0	1	0	1	0	0
NCU01260	0	1	1	0	1	0
NCU01261	1	0	1	1	0	0
NCU01266	0	0	0	0	1	0
NCU01267	0	0	0	0	0	0
NCU01268	0	0	0	0	0	0
NCU01269	1	1	0	0	1	0
NCU01270	0	0	0	0	0	0
NCU01271	1	1	0	0	0	0
NCU01272	0	0	0	0	0	0
NCU01273	0	0	0	0	0	0
NCU01274	0	0	0	0	0	0
NCU01275	1	1	0	0	0	0
NCU01276	1	1	1	1	0	0
NCU01277	0	1	0	0	0	0
NCU01278	0	0	0	0	0	0
NCU01279	0	0	0	1	0	1
NCU01281	0	0	0	0	0	0
NCU01282	0	1	0	0	0	1
NCU01283	1	1	0	0	1	0
NCU01284	0	0	0	0	0	0
NCU01285	0	1	0	1	0	0
NCU01288	1	0	1	1	0	0
NCU01289	0	1	1	1	0	0
NCU01290	0	1	1	0	0	1
NCU01291	0	0	0	0	0	0
NCU01294	1	1	0	1	0	1
NCU01296	1	0	0	0	1	1
NCU01297	0	1	0	1	0	0
NCU01298	0	0	0	0	0	0
NCU01299	0	0	1	1	1	1
NCU01300	1	0	0	0	1	0
NCU01301	0	0	0	0	0	0
NCU01302	0	1	0	0	0	0
NCU01303	0	0	0	0	0	0
NCU01304	0	1	0	1	0	1
NCU01305	1	0	1	1	1	0
NCU01306	0	0	1	0	1	0
NCU01307	1	0	1	1	1	0
NCU01308	0	0	0	0	0	0
NCU01309	0	1	0	1	1	1
NCU01310	0	0	0	0	0	0
NCU01312	1	1	1	1	1	0
NCU01313	0	0	0	0	0	0
NCU01315	0	0	0	0	0	0
NCU01318	1	1	1	1	1	1
NCU01319	1	0	1	0	0	1
NCU01320	0	0	0	0	0	0
NCU01321	1	1	1	0	0	0
NCU01322	1	1	0	0	0	0
NCU01323	0	0	0	0	0	0
NCU01324	0	0	0	0	0	0
NCU01327	0	0	1	0	0	0
NCU01328	1	0	1	1	1	0
NCU01329	0	0	0	0	0	0
NCU01330	0	0	1	0	0	1
NCU01331	0	0	0	0	0	0
NCU01332	0	0	1	1	0	0
NCU01333	1	0	0	1	0	0
NCU01335	0	0	0	0	0	0
NCU01336	0	1	0	0	0	0
NCU01337	0	1	0	0	0	0
NCU01338	0	0	1	1	1	0
NCU01339	0	0	0	0	0	0
NCU01340	0	0	1	0	1	0
NCU01341	0	0	0	0	0	0
NCU01342	0	0	0	0	0	0
NCU01343	0	0	0	0	0	0
NCU01344	0	1	0	1	0	0
NCU01345	0	1	0	0	0	0
NCU01346	0	0	0	0	0	0
NCU01347	1	1	1	0	1	1
NCU01348	1	1	0	0	0	0
NCU01349	1	0	0	1	1	1
NCU01353	0	0	0	1	0	0
NCU01355	1	0	0	0	0	0
NCU01356	1	1	1	1	0	0
NCU01357	0	0	0	0	0	0
NCU01358	0	0	0	0	0	0
NCU01360	0	0	0	0	0	0
NCU01361	0	0	0	0	0	0
NCU01362	0	0	0	0	0	0
NCU01364	1	0	0	0	0	0
NCU01365	1	1	0	0	0	0
NCU01366	0	0	0	0	0	0
NCU01367	0	0	0	0	0	0
NCU01368	1	0	0	0	0	0
NCU01369	0	0	0	0	0	0
NCU01370	1	1	1	1	1	1
NCU01371	1	1	0	0	0	0
NCU01374	1	1	1	1	1	1
NCU01375	0	0	0	0	0	0
NCU01376	0	0	0	0	0	0
NCU01377	0	0	0	0	0	0
NCU01378	0	1	0	1	0	0
NCU01379	0	0	0	0	0	1
NCU01380	1	1	0	1	1	0
NCU01381	0	0	0	0	0	1
NCU01382	0	0	0	0	0	0
NCU01383	1	0	0	1	1	0
NCU01385	0	0	1	1	1	0
NCU01387	0	0	0	0	0	1
NCU01388	0	0	0	0	0	0
NCU01389	0	0	0	0	0	0
NCU01390	0	0	1	0	0	0
NCU01391	1	0	0	0	0	0
NCU01392	0	0	1	1	0	1
NCU01393	0	0	0	0	0	0
NCU01394	1	0	0	0	0	0
NCU01395	0	1	0	0	0	0
NCU01396	1	0	0	1	1	1
NCU01397	0	0	0	0	0	0
NCU01398	1	0	0	0	1	1
NCU01399	1	0	0	0	0	0
NCU01400	0	1	1	1	0	1
NCU01401	0	1	0	0	0	0
NCU01402	0	0	0	0	0	0
NCU01403	0	0	0	0	0	0
NCU01404	1	0	1	0	0	0
NCU01408	0	1	0	0	0	0
NCU01409	0	1	1	0	1	0
NCU01411	0	0	0	0	0	0
NCU01412	0	0	1	0	1	1
NCU01413	0	1	1	0	0	1
NCU01414	0	1	0	1	1	1
NCU01415	1	0	1	1	0	1
NCU01416	1	1	1	0	0	0
NCU01417	0	0	0	0	1	0
NCU01418	1	1	1	1	1	0
NCU01419	0	0	1	0	0	0
NCU01420	0	0	0	0	0	0
NCU01421	1	0	0	0	0	0
NCU01422	0	0	0	0	0	0
NCU01423	1	0	0	0	0	0
NCU01424	1	1	1	1	1	1
NCU01425	1	0	1	1	0	0
NCU01426	0	0	0	1	0	0
NCU01428	0	0	0	0	1	0
NCU01429	0	1	0	0	0	0
NCU01430	0	0	0	1	0	0
NCU01431	0	0	0	1	1	1
NCU01432	1	1	0	0	0	1
NCU01433	1	1	1	1	0	0
NCU01435	1	0	1	0	1	0
NCU01436	1	1	0	0	0	0
NCU01438	1	0	1	1	1	0
NCU01440	0	0	0	1	1	0
NCU01441	0	0	0	1	0	0
NCU01442	0	0	0	0	0	0
NCU01443	0	1	0	0	0	0
NCU01444	0	1	0	0	0	0
NCU01445	0	1	0	0	0	0
NCU01446	0	0	0	0	0	1
NCU01447	1	1	0	1	0	0
NCU01448	1	0	0	1	1	0
NCU01449	0	0	0	0	0	0
NCU01450	1	1	1	0	1	1
NCU01451	1	1	1	1	1	1
NCU01454	0	0	0	0	0	0
NCU01455	0	1	0	0	0	0
NCU01456	0	0	0	0	0	0
NCU01457	0	1	0	0	0	0
NCU01458	0	0	0	0	0	0
NCU01459	0	0	0	0	0	1
NCU01460	0	1	0	1	1	0
NCU01461	0	0	1	0	0	0
NCU01462	0	0	0	0	0	0
NCU01463	0	1	0	0	0	0
NCU01464	0	1	0	0	0	0
NCU01465	0	0	0	0	1	1
NCU01466	0	0	0	0	0	0
NCU01467	0	0	0	0	0	0
NCU01468	1	1	0	1	0	0
NCU01469	1	1	0	0	0	0
NCU01470	0	0	0	0	0	0
NCU01471	0	1	0	0	0	0
NCU01473	0	0	0	0	0	0
NCU01474	0	0	0	0	0	0
NCU01475	0	0	0	0	0	0
NCU01476	0	0	0	0	0	0
NCU01477	0	0	0	0	0	0
NCU01478	1	1	1	0	1	1
NCU01479	1	1	1	0	1	1
NCU01480	0	0	0	0	0	0
NCU01481	0	0	0	0	0	0
NCU01484	1	1	1	1	1	1
NCU01485	1	1	1	0	0	0
NCU01486	0	0	0	0	0	0
NCU01487	0	0	0	0	0	0
NCU01488	0	1	0	0	1	1
NCU01489	0	0	1	0	0	0
NCU01490	0	0	0	0	0	0
NCU01491	0	1	0	0	0	0
NCU01494	1	0	0	0	0	0
NCU01496	0	0	0	0	1	0
NCU01498	0	1	1	1	1	0
NCU01499	0	0	0	0	0	0
NCU01500	0	0	0	0	0	0
NCU01501	0	0	1	0	1	0
NCU01502	0	0	0	0	1	1
NCU01503	0	0	1	1	1	1
NCU01504	0	0	0	0	0	0
NCU01505	0	0	0	0	0	0
NCU01506	0	0	0	0	0	0
NCU01509	0	0	0	0	0	0
NCU01510	0	0	0	0	0	0
NCU01511	1	0	1	0	0	1
NCU01512	1	1	0	0	0	0
NCU01514	1	1	1	1	1	1
NCU01515	0	0	0	0	0	0
NCU01516	0	0	0	0	0	0
NCU01517	0	0	0	0	0	0
NCU01519	0	0	1	0	0	0
NCU01520	1	0	0	0	0	0
NCU01521	1	0	0	1	0	0
NCU01522	0	0	0	0	0	1
NCU01523	1	1	1	0	0	1
NCU01525	0	1	0	0	0	0
NCU01526	0	0	0	0	0	1
NCU01527	0	0	0	0	0	0
NCU01528	0	1	1	1	1	1
NCU01529	1	0	1	0	1	0
NCU01531	1	0	0	0	0	0
NCU01532	1	0	0	0	1	0
NCU01534	0	0	0	0	0	0
NCU01535	0	0	0	0	0	0
NCU01536	0	0	1	1	1	0
NCU01539	1	1	0	0	0	1
NCU01540	0	0	1	0	1	0
NCU01541	0	0	0	0	0	0
NCU01542	1	0	0	1	0	0
NCU01543	0	0	0	0	0	0
NCU01545	1	0	0	0	0	0
NCU01546	0	0	1	1	1	0
NCU01547	0	0	0	0	0	0
NCU01548	1	1	1	1	0	1
NCU01549	0	0	0	0	0	0
NCU01550	0	0	0	0	0	0
NCU01551	1	1	0	0	0	0
NCU01552	0	0	0	0	0	0
NCU01553	1	1	0	1	1	1
NCU01554	1	0	0	1	0	1
NCU01555	1	0	0	0	1	0
NCU01559	0	1	1	0	0	0
NCU01561	0	0	0	0	0	0
NCU01563	0	0	0	0	0	0
NCU01564	1	1	0	0	0	1
NCU01565	0	0	0	0	0	0
NCU01568	1	0	0	0	0	1
NCU01569	0	0	0	0	0	0
NCU01570	0	0	0	0	0	0
NCU01571	1	0	0	0	0	0
NCU01572	0	0	0	0	0	0
NCU01573	0	1	0	0	0	1
NCU01575	0	0	0	0	0	0
NCU01577	0	0	0	0	0	0
NCU01579	0	0	0	0	0	0
NCU01580	1	1	0	0	1	1
NCU01581	0	0	0	0	0	0
NCU01584	1	1	1	1	1	1
NCU01585	0	1	1	1	0	0
NCU01589	1	1	1	0	0	0
NCU01595	1	1	1	0	1	1
NCU01596	0	0	0	0	0	0
NCU01597	0	0	0	0	0	0
NCU01598	0	1	0	0	0	0
NCU01599	0	0	0	0	0	0
NCU01601	0	0	0	0	0	0
NCU01605	1	1	1	0	1	1
NCU01606	0	1	1	0	0	0
NCU01607	1	1	0	0	1	0
NCU01608	1	1	0	0	0	0
NCU01610	0	1	0	0	0	0
NCU01611	0	1	0	0	0	0
NCU01612	0	0	0	0	0	0
NCU01613	0	0	0	0	0	0
NCU01614	0	0	0	0	0	0
NCU01615	1	1	0	0	1	0
NCU01620	0	0	0	0	0	0
NCU01623	0	0	0	0	0	0
NCU01625	0	0	0	0	0	0
NCU01629	0	0	0	0	0	0
NCU01631	1	0	0	0	0	1
NCU01632	1	1	0	0	0	0
NCU01633	1	1	0	0	0	1
NCU01634	0	0	0	0	0	0
NCU01635	1	0	1	1	1	1
NCU01636	0	0	0	0	0	1
NCU01637	1	0	1	1	1	0
NCU01638	1	1	0	0	0	0
NCU01640	1	1	1	0	0	1
NCU01643	1	1	0	0	0	0
NCU01644	0	0	0	0	0	0
NCU01645	0	0	0	0	0	0
NCU01646	1	1	1	0	0	1
NCU01647	0	0	0	0	0	0
NCU01649	0	0	0	0	0	1
NCU01650	1	0	0	1	0	0
NCU01651	0	0	0	0	0	0
NCU01652	1	1	0	0	0	0
NCU01653	0	0	0	0	0	0
NCU01654	0	0	0	0	0	1
NCU01655	1	0	1	1	0	0
NCU01656	0	0	0	0	0	0
NCU01657	0	0	0	0	0	0
NCU01658	0	1	0	0	0	1
NCU01659	1	0	0	0	0	0
NCU01664	0	0	1	1	1	0
NCU01665	0	0	0	0	0	0
NCU01666	1	1	0	0	0	0
NCU01667	0	0	0	0	0	0
NCU01668	0	1	1	0	1	1
NCU01669	1	0	1	0	0	0
NCU01670	0	0	0	0	0	0
NCU01672	1	0	0	0	1	0
NCU01673	1	0	0	0	0	0
NCU01674	0	0	0	0	0	0
NCU01675	0	0	1	1	1	0
NCU01678	0	1	0	0	0	0
NCU01679	0	0	0	0	0	0
NCU01680	0	0	0	0	0	0
NCU01681	1	1	0	0	0	1
NCU01684	0	0	0	0	0	0
NCU01686	1	1	1	1	1	0
NCU01688	0	1	0	0	0	1
NCU01689	1	0	0	1	1	0
NCU01692	0	0	0	0	0	0
NCU01695	0	0	0	0	0	0
NCU01696	1	0	0	0	0	0
NCU01698	0	1	0	0	1	1
NCU01700	0	0	0	0	0	0
NCU01701	1	1	1	0	0	0
NCU01702	0	0	0	0	0	0
NCU01703	1	0	0	0	0	0
NCU01704	0	1	1	0	0	1
NCU01705	1	1	0	0	0	1
NCU01706	0	0	0	0	0	0
NCU01713	1	0	0	0	0	0
NCU01715	0	1	1	1	0	0
NCU01720	0	0	1	0	0	0
NCU01724	1	1	0	0	0	1
NCU01725	1	1	1	1	0	0
NCU01728	1	0	1	1	1	0
NCU01729	0	0	0	0	0	0
NCU01731	1	1	1	0	1	0
NCU01734	0	0	0	0	0	0
NCU01735	1	0	0	1	1	0
NCU01737	0	1	0	0	0	0
NCU01738	1	1	0	0	0	0
NCU01739	0	1	1	0	1	1
NCU01740	1	0	0	1	1	0
NCU01741	1	1	0	0	0	1
NCU01744	1	1	1	1	1	1
NCU01745	0	0	0	0	0	0
NCU01746	0	0	0	0	0	0
NCU01747	1	1	0	1	0	0
NCU01748	0	0	0	0	0	0
NCU01750	0	0	0	0	1	0
NCU01751	1	1	0	0	0	0
NCU01752	0	1	1	0	0	0
NCU01753	1	1	1	0	1	0
NCU01754	0	0	1	1	1	0
NCU01756	0	1	0	0	0	0
NCU01757	1	0	1	1	1	0
NCU01758	0	0	0	0	0	0
NCU01759	0	0	0	0	0	0
NCU01761	0	1	0	1	0	0
NCU01762	1	1	0	1	0	1
NCU01765	0	0	0	0	0	0
NCU01766	1	1	1	1	0	1
NCU01767	0	0	0	0	0	0
NCU01768	0	0	0	0	0	0
NCU01769	1	0	0	0	0	0
NCU01771	0	1	0	0	0	0
NCU01772	0	1	0	0	1	0
NCU01776	1	1	1	1	1	0
NCU01777	1	1	0	0	0	0
NCU01779	0	0	0	0	0	0
NCU01780	0	0	0	0	0	0
NCU01782	0	1	1	1	1	1
NCU01783	0	0	0	0	0	0
NCU01784	1	1	0	0	0	0
NCU01785	0	0	0	0	0	0
NCU01786	0	0	0	0	0	0
NCU01788	0	0	0	1	1	1
NCU01789	1	0	0	0	1	0
NCU01790	0	0	0	0	0	0
NCU01791	0	0	0	0	0	0
NCU01792	0	1	0	0	0	0
NCU01793	0	1	0	0	0	0
NCU01794	0	0	0	1	0	0
NCU01795	1	1	0	1	0	1
NCU01796	0	0	0	0	0	0
NCU01797	0	0	0	0	1	0
NCU01799	1	0	0	0	0	0
NCU01800	0	1	0	0	0	0
NCU01801	1	0	1	1	1	0
NCU01803	0	0	0	0	0	0
NCU01805	0	0	0	0	0	0
NCU01806	1	0	0	0	0	0
NCU01807	0	0	0	0	0	0
NCU01808	0	0	0	0	0	1
NCU01809	0	0	0	0	0	0
NCU01810	0	0	0	0	0	0
NCU01811	0	0	1	0	0	1
NCU01812	1	1	0	1	0	1
NCU01813	0	1	0	0	0	0
NCU01814	0	0	0	0	0	0
NCU01815	1	1	0	0	0	0
NCU01816	0	1	0	0	0	0
NCU01817	0	0	0	0	0	0
NCU01819	0	0	0	0	1	1
NCU01820	0	0	0	0	0	0
NCU01821	0	0	0	0	0	0
NCU01822	1	1	0	0	0	0
NCU01823	0	0	0	0	0	0
NCU01824	0	0	0	0	0	0
NCU01826	0	0	0	0	0	0
NCU01827	0	0	0	0	0	0
NCU01828	0	1	0	0	1	0
NCU01829	0	0	1	1	0	1
NCU01830	1	0	1	0	1	0
NCU01831	1	0	0	0	0	0
NCU01833	1	0	1	1	1	0
NCU01834	1	1	0	0	0	0
NCU01835	0	0	0	0	1	0
NCU01837	0	1	0	0	0	1
NCU01838	0	0	0	0	0	0
NCU01839	1	1	0	0	1	1
NCU01841	0	0	0	0	0	0
NCU01842	1	0	0	1	0	0
NCU01843	0	0	0	0	0	0
NCU01844	1	0	0	0	0	0
NCU01845	0	0	0	0	0	0
NCU01846	0	0	0	0	0	0
NCU01848	1	1	1	0	1	1
NCU01849	1	1	0	1	0	0
NCU01850	0	0	1	0	0	0
NCU01851	0	0	0	0	0	0
NCU01852	1	0	0	0	0	0
NCU01854	1	0	0	0	1	0
NCU01855	1	1	0	0	1	0
NCU01856	0	1	1	1	0	1
NCU01857	0	0	0	0	0	0
NCU01858	0	0	0	0	0	0
NCU01859	0	0	0	0	0	1
NCU01860	0	0	0	0	0	0
NCU01861	1	1	0	0	0	0
NCU01862	0	1	0	0	1	0
NCU01863	0	0	0	0	0	0
NCU01865	0	0	0	0	0	0
NCU01867	1	1	1	1	1	1
NCU01868	1	1	0	0	0	0
NCU01869	0	0	1	1	0	1
NCU01870	0	0	0	0	0	1
NCU01871	0	0	0	0	0	0
NCU01872	0	0	1	1	0	1
NCU01873	1	0	0	0	0	0
NCU01874	0	0	0	0	0	0
NCU01875	1	0	0	0	0	0
NCU01876	0	0	0	0	0	0
NCU01878	0	1	0	0	0	0
NCU01879	0	0	1	0	0	0
NCU01881	1	0	0	0	0	0
NCU01882	1	0	0	1	1	1
NCU01883	0	0	0	0	0	0
NCU01884	1	1	0	0	0	0
NCU01888	1	1	0	1	1	0
NCU01889	1	0	1	1	1	1
NCU01891	0	1	1	0	0	0
NCU01894	0	0	0	0	0	0
NCU01895	1	0	0	0	1	0
NCU01896	0	1	0	0	1	0
NCU01897	1	1	0	0	0	0
NCU01899	0	0	0	0	0	0
NCU01900	1	1	0	0	0	0
NCU01901	0	0	0	0	0	0
NCU01902	1	1	0	1	1	1
NCU01904	0	1	1	0	0	1
NCU01905	1	1	0	0	1	0
NCU01907	0	0	0	0	0	0
NCU01908	0	0	0	1	0	1
NCU01910	0	0	0	0	0	0
NCU01911	1	1	1	1	1	0
NCU01912	0	1	0	0	0	0
NCU01913	0	1	0	0	0	0
NCU01914	0	0	0	0	0	0
NCU01916	0	0	0	0	0	1
NCU01918	0	0	0	0	0	0
NCU01919	0	0	1	0	0	0
NCU01922	1	1	0	0	1	0
NCU01924	0	0	1	1	1	0
NCU01926	0	0	0	0	1	0
NCU01927	0	1	1	1	0	1
NCU01928	0	0	0	0	0	0
NCU01929	1	0	0	1	1	1
NCU01930	0	0	0	0	0	0
NCU01931	1	0	0	0	1	0
NCU01935	0	0	1	0	1	0
NCU01936	0	1	0	0	0	0
NCU01938	0	0	0	0	0	0
NCU01939	0	0	0	0	0	0
NCU01940	0	0	1	0	1	0
NCU01942	1	0	1	1	1	1
NCU01943	0	0	0	0	0	0
NCU01944	0	0	0	0	0	0
NCU01945	1	1	0	0	0	0
NCU01946	0	0	1	0	0	0
NCU01947	1	0	0	0	0	1
NCU01948	1	0	0	0	0	0
NCU01949	0	0	0	0	0	0
NCU01950	0	0	0	0	0	0
NCU01951	0	1	0	0	0	0
NCU01953	0	0	0	0	0	0
NCU01954	0	0	0	0	0	0
NCU01955	0	0	0	0	0	0
NCU01956	1	1	0	0	0	0
NCU01957	0	0	1	1	0	0
NCU01958	0	failed	0	failed	failed	1
NCU01961	0	0	1	0	0	0
NCU01962	1	1	1	1	1	1
NCU01963	1	1	0	0	0	1
NCU01964	1	0	1	0	0	0
NCU01965	0	0	0	0	0	0
NCU01966	0	1	0	0	0	0
NCU01967	0	0	0	0	0	0
NCU01968	0	0	0	1	1	1
NCU01969	1	0	0	0	1	1
NCU01970	1	0	0	0	1	1
NCU01971	1	1	0	0	0	1
NCU01972	0	0	0	0	0	0
NCU01973	0	0	0	0	0	0
NCU01974	0	0	0	0	0	0
NCU01975	0	0	0	0	0	1
NCU01976	0	0	0	1	0	0
NCU01977	0	0	0	0	0	0
NCU01980	0	0	0	0	0	0
NCU01981	1	1	1	1	1	1
NCU01982	0	1	0	0	1	0
NCU01983	1	1	0	0	0	0
NCU01984	0	1	1	1	1	0
NCU01985	1	0	1	0	1	1
NCU01989	0	0	0	0	0	0
NCU01990	1	1	0	1	0	1
NCU01991	0	0	0	0	0	0
NCU01992	1	1	1	1	0	1
NCU01993	0	0	1	0	0	0
NCU01994	0	0	0	0	0	0
NCU01995	0	0	0	0	0	0
NCU01996	0	0	0	0	0	0
NCU01997	0	0	0	0	0	0
NCU01998	0	0	0	0	0	0
NCU01999	0	0	0	1	0	0
NCU02000	0	0	0	0	0	0
NCU02001	0	0	0	0	0	0
NCU02002	0	0	0	0	0	0
NCU02003	0	0	0	0	0	0
NCU02004	1	1	0	0	0	1
NCU02005	0	1	0	0	0	1
NCU02006	0	0	0	0	0	0
NCU02007	0	0	0	0	0	0
NCU02008	1	0	1	0	0	0
NCU02009	0	0	0	0	0	0
NCU02010	0	0	0	0	0	0
NCU02011	1	0	1	1	1	1
NCU02012	0	0	0	0	0	1
NCU02013	1	1	1	1	0	0
NCU02015	0	1	1	1	0	1
NCU02016	0	1	0	0	0	0
NCU02017	0	1	0	0	0	0
NCU02018	0	0	0	0	0	0
NCU02019	1	1	1	1	1	0
NCU02020	0	1	0	1	0	1
NCU02021	1	0	0	1	1	0
NCU02022	0	1	0	0	1	1
NCU02023	0	1	0	1	1	1
NCU02024	0	0	0	0	0	1
NCU02025	0	0	0	0	0	0
NCU02026	0	0	0	1	0	0
NCU02027	0	0	0	0	0	0
NCU02028	0	0	0	0	0	0
NCU02029	0	0	0	1	0	0
NCU02031	1	1	1	1	1	1
NCU02032	0	0	0	0	1	0
NCU02033	0	0	0	0	0	0
NCU02034	0	0	0	0	1	0
NCU02035	0	1	0	0	0	1
NCU02036	0	0	0	0	0	0
NCU02039	0	0	0	0	0	0
NCU02040	1	1	1	1	1	1
NCU02041	0	0	0	0	1	1
NCU02042	1	0	1	0	0	0
NCU02043	1	0	1	0	1	0
NCU02044	1	1	0	1	1	1
NCU02046	0	0	0	0	0	0
NCU02048	0	0	0	0	0	0
NCU02049	0	0	0	0	0	1
NCU02051	1	0	0	0	0	0
NCU02052	1	0	0	0	1	0
NCU02053	1	1	1	0	0	0
NCU02054	0	0	0	0	0	0
NCU02055	0	0	0	0	0	0
NCU02056	1	1	1	1	1	1
NCU02057	0	0	0	0	0	0
NCU02058	0	0	0	0	0	0
NCU02059	1	0	0	1	1	0
NCU02060	0	0	0	1	0	0
NCU02062	0	0	0	0	1	0
NCU02063	1	1	1	0	0	0
NCU02064	1	1	0	0	0	0
NCU02065	0	0	1	0	1	0
NCU02066	0	0	0	0	0	0
NCU02067	1	1	0	0	0	0
NCU02068	0	0	0	0	1	0
NCU02070	1	1	0	0	0	0
NCU02071	1	0	1	1	0	1
NCU02073	0	0	1	1	1	1
NCU02074	1	1	1	1	1	1
NCU02075	0	1	1	1	0	1
NCU02076	0	1	0	0	0	1
NCU02078	1	1	1	1	1	1
NCU02079	0	0	0	0	0	0
NCU02080	1	0	0	1	0	0
NCU02081	0	0	0	0	0	0
NCU02082	0	0	0	0	0	0
NCU02083	0	0	0	0	0	0
NCU02084	0	0	0	0	0	0
NCU02085	1	1	0	0	1	0
NCU02088	0	0	1	1	0	0
NCU02089	0	0	0	0	0	0
NCU02090	0	0	0	0	0	0
NCU02091	0	0	1	0	1	1
NCU02094	0	0	0	1	1	0
NCU02095	0	0	0	0	0	0
NCU02097	0	0	1	1	0	0
NCU02100	0	0	0	0	0	0
NCU02101	1	1	0	0	0	0
NCU02103	0	1	0	0	0	1
NCU02104	1	0	0	0	0	0
NCU02105	1	0	0	0	0	0
NCU02106	0	0	0	0	0	0
NCU02109	0	0	0	0	1	0
NCU02110	1	0	1	0	0	0
NCU02111	1	1	1	1	0	1
NCU02112	0	0	0	0	0	0
NCU02113	1	1	1	0	0	1
NCU02114	0	0	1	0	0	0
NCU02115	0	0	0	0	0	0
NCU02116	0	1	0	1	0	0
NCU02117	0	1	0	0	1	0
NCU02118	0	0	0	0	0	0
NCU02119	1	0	0	0	0	1
NCU02120	0	0	0	0	0	0
NCU02121	0	1	1	1	0	1
NCU02122	0	1	0	0	0	0
NCU02123	0	1	0	0	0	0
NCU02124	0	0	0	0	0	0
NCU02125	0	0	0	0	0	0
NCU02126	1	1	1	1	1	0
NCU02127	1	0	0	0	0	0
NCU02129	0	0	0	0	0	0
NCU02130	1	0	1	0	0	0
NCU02131	0	1	1	0	0	0
NCU02132	1	1	0	1	0	1
NCU02133	1	0	0	0	0	0
NCU02134	0	0	0	0	0	1
NCU02136	0	0	0	0	0	0
NCU02137	1	1	1	0	1	0
NCU02138	1	0	1	1	1	0
NCU02142	1	1	0	0	0	0
NCU02143	1	1	1	0	0	1
NCU02144	0	0	0	1	1	1
NCU02147	1	1	1	0	1	0
NCU02148	0	0	0	0	0	0
NCU02149	0	0	0	0	0	0
NCU02150	0	0	0	0	0	0
NCU02151	0	0	0	0	0	0
NCU02152	0	1	0	0	1	0
NCU02153	0	0	0	0	0	0
NCU02155	0	0	0	0	0	0
NCU02156	0	0	1	0	0	0
NCU02157	0	0	0	0	0	0
NCU02158	0	0	0	1	0	0
NCU02159	0	0	0	0	1	1
NCU02160	1	1	0	0	0	0
NCU02161	1	1	0	0	0	0
NCU02162	0	0	1	1	1	1
NCU02163	0	0	0	0	0	0
NCU02164	1	1	0	1	0	0
NCU02165	1	1	1	1	1	1
NCU02167	1	0	1	1	1	0
NCU02168	0	0	0	0	1	1
NCU02169	0	1	0	0	0	0
NCU02171	0	0	0	0	0	0
NCU02172	0	0	1	0	1	1
NCU02173	0	0	0	0	0	0
NCU02174	1	1	0	0	0	0
NCU02175	1	1	0	0	1	1
NCU02176	1	1	0	0	1	0
NCU02177	1	1	0	0	0	1
NCU02181	1	1	0	1	0	1
NCU02182	0	0	0	0	0	0
NCU02183	0	0	0	0	0	0
NCU02184	1	1	1	1	1	1
NCU02187	0	1	0	0	0	1
NCU02188	0	0	0	0	0	0
NCU02190	0	1	1	1	1	0
NCU02192	0	0	1	1	1	1
NCU02193	0	0	0	0	0	0
NCU02194	1	1	0	0	0	0
NCU02195	1	0	0	0	0	0
NCU02196	1	1	1	0	0	0
NCU02200	0	1	0	0	0	0
NCU02201	0	1	0	0	0	0
NCU02202	0	1	0	0	0	0
NCU02203	1	1	0	0	0	0
NCU02204	0	0	0	0	0	0
NCU02205	1	0	1	1	1	1
NCU02207	1	1	0	0	0	1
NCU02208	0	0	1	0	0	0
NCU02209	0	0	0	0	0	0
NCU02211	0	1	0	0	1	1
NCU02212	1	1	1	1	1	1
NCU02213	0	0	0	0	0	0
NCU02214	0	0	0	0	0	0
NCU02215	1	0	0	0	0	0
NCU02216	1	1	1	1	1	1
NCU02217	0	0	1	0	0	0
NCU02218	0	1	0	0	0	1
NCU02219	0	0	0	0	0	0
NCU02220	0	0	0	0	0	0
NCU02221	1	0	0	0	0	0
NCU02222	0	0	1	0	0	0
NCU02223	0	0	0	0	0	0
NCU02224	0	0	0	0	0	0
NCU02225	0	1	0	0	1	0
NCU02226	0	1	0	0	0	0
NCU02227	1	1	1	1	1	0
NCU02228	0	0	0	0	0	0
NCU02229	0	0	0	0	0	0
NCU02230	0	0	0	1	0	0
NCU02231	1	0	1	0	1	1
NCU02232	0	0	0	0	0	1
NCU02233	1	1	0	0	0	1
NCU02234	0	0	0	0	0	1
NCU02235	0	0	0	0	1	1
NCU02236	0	0	0	0	0	0
NCU02237	0	0	0	0	0	0
NCU02238	0	1	0	0	0	0
NCU02239	0	1	0	0	0	1
NCU02240	1	1	0	0	1	0
NCU02241	0	0	1	0	0	0
NCU02242	0	1	0	0	0	0
NCU02243	1	0	0	1	0	0
NCU02244	1	1	1	1	1	1
NCU02245	1	1	0	0	0	0
NCU02246	0	0	1	1	0	1
NCU02248	0	1	0	0	0	0
NCU02249	1	1	0	0	1	0
NCU02250	0	0	0	0	0	0
NCU02251	1	1	0	1	1	1
NCU02252	0	0	0	0	0	0
NCU02253	0	0	0	0	0	0
NCU02254	1	0	0	1	0	0
NCU02255	0	0	0	0	1	0
NCU02256	0	0	0	0	0	0
NCU02257	0	0	0	0	0	0
NCU02258	0	0	1	1	1	0
NCU02259	0	0	0	0	0	0
NCU02260	1	0	1	1	1	1
NCU02261	0	1	0	0	1	0
NCU02262	1	0	0	0	1	0
NCU02263	0	1	0	0	0	1
NCU02264	1	0	0	0	1	0
NCU02265	0	0	0	0	0	0
NCU02267	1	0	0	0	0	0
NCU02268	0	1	0	0	0	0
NCU02269	0	0	0	0	0	0
NCU02270	0	0	0	0	0	0
NCU02271	0	1	0	0	0	0
NCU02273	0	0	0	0	0	0
NCU02274	1	1	0	1	0	1
NCU02275	0	0	0	0	0	0
NCU02276	0	0	0	0	0	0
NCU02277	1	1	1	0	1	0
NCU02278	1	1	1	0	0	0
NCU02280	0	0	0	0	0	0
NCU02281	1	1	1	1	1	1
NCU02282	1	0	0	0	0	1
NCU02283	0	0	1	0	0	1
NCU02284	0	0	0	0	0	0
NCU02285	1	1	1	1	1	1
NCU02286	0	1	0	0	0	1
NCU02287	1	0	0	0	0	0
NCU02289	0	1	0	0	0	0
NCU02291	0	0	0	0	0	0
NCU02293	1	0	0	0	0	0
NCU02294	0	0	0	0	0	0
NCU02295	0	0	0	0	1	0
NCU02296	0	0	0	0	0	0
NCU02298	1	0	0	0	0	0
NCU02299	1	1	1	0	1	0
NCU02302	1	1	1	1	1	0
NCU02303	0	0	0	0	0	0
NCU02304	0	0	0	0	0	0
NCU02305	1	1	0	0	0	0
NCU02308	1	0	0	0	0	0
NCU02310	1	0	1	1	1	0
NCU02315	0	0	0	0	0	0
NCU02316	0	0	1	1	1	1
NCU02317	0	0	0	0	0	0
NCU02318	1	0	0	0	0	0
NCU02319	1	0	1	1	1	0
NCU02322	0	0	0	0	0	0
NCU02323	0	1	1	1	1	1
NCU02324	0	0	1	0	0	0
NCU02325	0	0	0	0	0	0
NCU02326	0	0	0	0	0	0
NCU02327	1	0	1	0	0	0
NCU02328	1	1	0	0	0	0
NCU02329	0	0	0	0	0	0
NCU02331	1	0	0	0	0	0
NCU02333	0	0	0	0	0	0
NCU02334	1	0	0	0	0	0
NCU02335	0	0	0	0	1	0
NCU02336	0	0	0	0	0	0
NCU02337	0	0	0	0	0	0
NCU02338	1	1	1	1	1	1
NCU02342	0	0	1	0	0	0
NCU02343	0	1	1	0	1	1
NCU02344	1	1	0	0	0	0
NCU02345	0	0	0	0	0	0
NCU02347	0	0	0	0	0	0
NCU02348	0	0	0	0	0	0
NCU02349	1	0	0	0	0	0
NCU02350	1	1	1	1	1	0
NCU02351	0	0	0	0	0	0
NCU02352	1	1	0	0	0	0
NCU02353	1	1	0	0	0	1
NCU02354	0	1	0	0	0	1
NCU02355	0	0	0	0	1	0
NCU02356	0	0	0	0	0	0
NCU02357	0	0	0	0	0	0
NCU02358	0	0	0	1	0	0
NCU02359	0	1	0	0	0	0
NCU02360	0	0	1	1	0	1
NCU02362	1	1	0	0	0	0
NCU02363	1	1	0	0	1	1
NCU02364	0	0	0	0	0	0
NCU02365	1	1	1	1	1	1
NCU02366	0	0	0	0	0	0
NCU02367	0	0	0	0	0	0
NCU02368	1	1	0	1	0	1
NCU02369	1	1	1	0	0	0
NCU02370	0	0	0	0	0	0
NCU02371	1	1	0	0	0	0
NCU02372	0	0	0	0	0	0
NCU02373	0	0	0	0	0	0
NCU02374	0	1	0	0	0	0
NCU02375	1	1	0	0	0	0
NCU02376	0	0	0	0	0	0
NCU02377	0	0	0	0	0	0
NCU02378	1	1	0	1	0	0
NCU02379	1	1	0	1	1	0
NCU02380	0	1	0	0	0	0
NCU02381	1	0	1	1	0	1
NCU02382	1	1	0	1	0	0
NCU02383	0	1	0	0	0	0
NCU02385	0	1	0	0	0	0
NCU02386	0	0	0	0	0	0
NCU02387	0	0	0	0	0	0
NCU02390	1	0	0	1	1	1
NCU02391	1	1	1	1	1	0
NCU02393	0	0	1	1	1	1
NCU02394	0	1	0	0	0	0
NCU02395	0	0	0	0	0	0
NCU02396	0	0	1	1	1	1
NCU02397	0	0	0	0	0	0
NCU02398	0	0	0	0	0	0
NCU02399	0	0	0	0	0	0
NCU02400	0	0	0	0	0	0
NCU02401	0	0	0	0	0	0
NCU02402	0	0	0	0	1	1
NCU02404	1	1	1	0	1	1
NCU02405	1	1	0	1	0	0
NCU02406	1	0	1	1	0	0
NCU02407	0	0	0	0	0	0
NCU02408	1	0	1	0	0	0
NCU02409	1	1	0	1	1	0
NCU02410	0	0	1	0	0	0
NCU02411	0	0	0	0	0	0
NCU02412	1	0	1	0	1	0
NCU02413	0	0	0	1	0	0
NCU02414	1	1	0	0	0	1
NCU02415	0	0	0	1	0	0
NCU02416	0	1	0	0	0	0
NCU02417	0	0	0	0	0	0
NCU02418	0	0	0	0	0	0
NCU02419	0	1	0	0	0	0
NCU02420	0	0	0	0	0	0
NCU02421	0	0	0	0	0	0
NCU02422	0	0	0	0	0	0
NCU02423	1	1	0	0	0	1
NCU02424	1	1	1	0	0	0
NCU02425	1	1	1	1	0	1
NCU02428	0	0	0	0	0	0
NCU02429	0	0	0	0	0	0
NCU02430	1	0	1	0	0	0
NCU02431	0	0	0	0	0	0
NCU02432	0	0	0	0	0	0
NCU02433	1	1	0	1	1	1
NCU02434	0	0	0	1	0	0
NCU02435	0	0	0	0	0	0
NCU02436	1	1	0	0	1	1
NCU02437	0	0	0	0	0	0
NCU02438	0	0	0	0	0	0
NCU02450	0	0	0	0	0	0
NCU02451	1	1	0	0	0	0
NCU02452	0	0	0	0	0	0
NCU02453	1	0	0	0	1	0
NCU02455	0	0	0	1	0	0
NCU02456	1	1	1	1	1	1
NCU02457	1	1	0	0	0	0
NCU02458	0	0	0	0	0	0
NCU02459	1	1	0	0	0	0
NCU02460	0	0	0	0	0	0
NCU02461	1	1	1	0	1	0
NCU02464	1	1	0	0	0	0
NCU02465	0	0	1	1	1	0
NCU02466	1	1	0	1	1	0
NCU02467	0	0	0	1	0	0
NCU02468	0	0	0	0	0	0
NCU02470	1	1	1	1	1	0
NCU02472	0	0	0	0	0	0
NCU02473	0	0	0	0	1	1
NCU02474	1	1	0	0	0	0
NCU02475	0	0	0	0	0	0
NCU02476	0	0	0	0	0	0
NCU02477	1	0	1	0	0	0
NCU02478	0	0	0	0	0	0
NCU02479	1	1	1	0	0	0
NCU02480	0	0	0	0	0	0
NCU02482	0	0	0	0	0	0
NCU02485	0	0	1	1	0	1
NCU02487	1	0	1	1	0	0
NCU02488	1	1	0	0	0	0
NCU02490	0	0	1	0	0	0
NCU02491	0	0	0	0	0	0
NCU02492	0	0	0	0	1	0
NCU02493	1	1	0	0	0	0
NCU02494	0	0	0	0	0	0
NCU02495	0	0	0	1	1	1
NCU02496	1	1	1	1	1	0
NCU02497	0	1	0	0	0	0
NCU02498	0	0	1	0	0	0
NCU02499	0	1	0	0	0	0
NCU02500	0	0	0	0	0	1
NCU02501	1	1	1	1	1	1
NCU02502	0	0	0	0	0	0
NCU02503	0	0	0	0	0	0
NCU02504	1	1	1	1	1	1
NCU02505	0	0	0	0	0	0
NCU02507	1	0	0	0	0	0
NCU02508	0	0	0	0	0	0
NCU02509	0	0	0	0	1	1
NCU02510	0	1	0	0	0	0
NCU02511	0	0	0	0	0	0
NCU02512	1	1	0	0	0	0
NCU02514	0	0	0	0	0	0
NCU02515	0	0	0	0	0	0
NCU02517	0	0	0	1	0	0
NCU02519	0	0	0	0	0	0
NCU02520	0	0	0	0	0	0
NCU02522	1	1	1	1	1	1
NCU02523	1	1	0	0	0	0
NCU02524	0	0	0	0	0	0
NCU02525	0	0	0	0	0	0
NCU02526	1	1	0	0	0	0
NCU02528	1	1	0	0	1	1
NCU02529	0	0	0	0	0	0
NCU02530	0	0	0	0	0	0
NCU02531	0	0	1	1	1	1
NCU02532	0	0	0	0	0	0
NCU02533	0	0	0	0	0	0
NCU02534	0	0	0	1	0	0
NCU02536	1	0	1	0	0	0
NCU02538	0	1	0	0	0	0
NCU02539	0	0	0	0	0	1
NCU02540	1	0	0	0	0	0
NCU02541	0	0	1	0	1	0
NCU02542	1	1	0	0	1	1
NCU02543	0	0	0	0	0	0
NCU02544	0	0	0	0	0	0
NCU02547	1	0	0	0	0	0
NCU02548	0	1	0	0	0	0
NCU02549	0	0	1	0	0	0
NCU02550	1	0	1	1	1	0
NCU02552	0	0	0	0	0	1
NCU02553	0	0	0	0	0	0
NCU02554	0	0	0	0	1	0
NCU02555	0	1	0	0	0	0
NCU02556	0	1	0	0	0	0
NCU02558	0	0	0	0	0	0
NCU02559	0	0	0	0	0	1
NCU02560	0	1	0	1	1	0
NCU02561	1	0	0	1	1	1
NCU02562	1	0	0	0	1	0
NCU02563	0	0	0	0	0	0
NCU02564	0	0	0	0	0	0
NCU02565	0	1	0	0	0	0
NCU02568	0	0	0	0	0	0
NCU02570	1	1	1	1	1	1
NCU02571	0	0	0	0	0	0
NCU02572	0	0	1	0	0	0
NCU02575	1	0	0	1	1	0
NCU02576	0	0	0	0	0	0
NCU02577	1	0	0	0	0	0
NCU02578	1	0	0	1	0	0
NCU02579	1	0	0	0	0	0
NCU02580	1	1	0	1	0	0
NCU02582	0	0	0	0	0	0
NCU02584	1	0	0	1	0	0
NCU02585	1	0	1	0	0	0
NCU02586	0	1	0	0	0	1
NCU02587	1	0	1	1	0	0
NCU02588	0	0	1	0	0	0
NCU02589	1	0	0	0	0	1
NCU02590	0	0	0	1	1	0
NCU02591	1	0	1	1	0	0
NCU02592	1	1	0	0	0	0
NCU02594	0	1	0	1	0	0
NCU02595	0	0	0	0	0	0
NCU02596	1	0	1	0	1	0
NCU02597	0	0	0	0	0	0
NCU02598	0	0	0	0	0	0
NCU02601	0	1	0	1	0	1
NCU02602	0	0	0	0	0	0
NCU02603	0	0	0	0	1	1
NCU02604	1	1	0	0	0	0
NCU02605	0	0	0	0	0	0
NCU02606	0	0	0	0	0	0
NCU02607	0	0	0	0	0	0
NCU02608	0	0	0	0	0	0
NCU02609	1	1	1	1	0	0
NCU02610	0	1	0	1	1	1
NCU02611	0	0	1	0	0	0
[truncated: 5,757 more rows]
