# Supplementary material for: The ACF chromatin-remodeling complex is essential for Polycomb repression
Source: eLife. 2022 Mar 8;11:e77595. doi: 10.7554/eLife.77595 (PMC9038196; doi:10.7554/eLife.77595)
Supplement: Figure 6—source data 1. [file elife-77595-fig6-data1.xlsx]

## Sheet: data
gene	Δiswi	Δash1	Δacf1	Δset7	Δepr1	Δiswi	Δash1	Δacf1	Δset7	Δepr1
NCU09147	6.81866	8.75035	5.5955	2.76371	-0.349067	6.81866	8.75035	5.5955	2.76371	-0.349067
NCU06163	7.88949	8.54349	2.62689	3.335	0.0967347	7.88949	8.54349	2.62689	3.335	0.0967347
NCU07152	8.15075	6.72371	4.67146	6.84808	-0.979068	8.15075	6.72371	4.67146	6.84808	-0.979068
NCU07091	6.93493	7.02663	5.49843	3.2416	0.662421	6.93493	7.02663	5.49843	3.2416	0.662421
NCU09604	6.45939	6.58563	5.86012	4.52803	0.731112	6.45939	6.58563	5.86012	4.52803	0.731112
NCU07249	5.80583	3.6166	3.20349	5.12159	-0.117821	5.80583	3.6166	3.20349	5.12159	-0.117821
NCU12075	4.83698	5.32246	3.78814	3.51009	-0.971309	4.83698	5.32246	3.78814	3.51009	-0.971309
NCU09165	5.21615	3.85668	5.07859	3.83718	-0.83899	5.21615	3.85668	5.07859	3.83718	-0.83899
NCU05176	3.3142	5.09831	3.16945	2.83995	-0.926241	3.3142	5.09831	3.16945	2.83995	-0.926241
NCU09939	4.73686	4.86006	2.82463	2.29455	-0.0667772	4.73686	4.86006	2.82463	2.29455	-0.0667772
NCU03476	4.30849	4.71703	2.92512	2.18121	-0.020272	4.30849	4.71703	2.92512	2.18121	-0.020272
NCU09650	4.42102	1.98114	2.3148	0.142069	1.20919	4.42102	1.98114	2.3148	0.142069	1.20919
NCU16716	2.58321	4.49116	1.92327	3.10325	1.57539	2.58321	4.49116	1.92327	3.10325	1.57539
NCU04917	3.21995	4.17418	0.695291	3.24724	2.06188	3.21995	4.17418	0.695291	3.24724	2.06188
NCU07150	6.21889	8.57788	5.03181	8.06599	-1.52143	6.21889	8.57788	5.03181	8.06599	-1.52143
NCU17053	6.17867	5.92063	4.69664	3.90825	-2.32132	6.17867	5.92063	4.69664	3.90825	-2.32132
NCU09633	4.14754	3.98126	5.33012	4.83921	-1.47927	4.14754	3.98126	5.33012	4.83921	-1.47927
NCU08570	2.77189	3.18496	2.35938	4.84653	-4.03209	2.77189	3.18496	2.35938	4.84653	-4.03209
NCU09306	3.42492	2.67632	3.08574	3.33258	-1.2908	3.42492	2.67632	3.08574	3.33258	-1.2908
NCU07624	3.21889	1.75463	2.8703	2.80157	-1.33711	3.21889	1.75463	2.8703	2.80157	-1.33711
NCU08796	10.9233	11.2906	7.15216	0.342603		10.9233	11.2906	7.15216	0.342603
NCU06902	10.1454	5.61484	7.6992	0		10.1454	5.61484	7.6992	0
NCU04697	5.03714	9.20794	3.6551	1.72436	-0.408397	5.03714	9.20794	3.6551	1.72436	-0.408397
NCU08835	7.16762	8.84268	5.69298	-1.02098		7.16762	8.84268	5.69298	-1.02098
NCU16738	8.44738	4.84689	2.22453	1.43323	0.961216	8.44738	4.84689	2.22453	1.43323	0.961216
NCU08756	5.76209	8.39237	3.52208	2.44046	0.895841	5.76209	8.39237	3.52208	2.44046	0.895841
NCU17202	7.48415	8.00874	5.15231	2.84898		7.48415	8.00874	5.15231	2.84898
NCU12069	7.79451	4.08936	2.86871	-2.31213		7.79451	4.08936	2.86871	-2.31213
NCU06164	7.65266	5.13188	5.54026	-1.00787		7.65266	5.13188	5.54026	-1.00787
NCU05912	5.75084	7.48173	4.26468	-0.17683		5.75084	7.48173	4.26468	-0.17683
NCU09590	7.28986	5.23409	3.46173	1.50495	0.452877	7.28986	5.23409	3.46173	1.50495	0.452877
NCU04703	7.22521	5.16886	4.36403	-0.799512		7.22521	5.16886	4.36403	-0.799512
NCU04710	5.13825	6.65773	3.44462	-1.28312		5.13825	6.65773	3.44462	-1.28312
NCU08837	6.3474	6.34183	3.45536	-2.68418		6.3474	6.34183	3.45536	-2.68418
NCU08832	6.09384	6.31253	3.26231	0.340949		6.09384	6.31253	3.26231	0.340949
NCU09605	5.97706	6.25404	5.75926	-0.0109984	0.543845	5.97706	6.25404	5.75926	-0.0109984	0.543845
NCU06155	5.21669	6.14399	2.2485	0.837052	-0.127128	5.21669	6.14399	2.2485	0.837052	-0.127128
NCU06905	5.98718	4.76173	5.37285	0.665641	0.476876	5.98718	4.76173	5.37285	0.665641	0.476876
NCU04702	5.6072	5.92819	3.81035	-0.0137922		5.6072	5.92819	3.81035	-0.0137922
NCU09603	2.939	5.91581	3.18295	2.28841	1.19755	2.939	5.91581	3.18295	2.28841	1.19755
NCU08830	4.36479	5.8459	4.22505	-0.448629		4.36479	5.8459	4.22505	-0.448629
NCU16876	5.21276	5.71786	5.09048	2.19273		5.21276	5.71786	5.09048	2.19273
NCU08834	5.57953	5.71004	4.04973	-0.494193		5.57953	5.71004	4.04973	-0.494193
NCU08630	3.54399	5.22529	2.26539	0.408388	0.401066	3.54399	5.22529	2.26539	0.408388	0.401066
NCU08838	4.98163	4.05833	4.73546	-0.128117		4.98163	4.05833	4.73546	-0.128117
NCU08531	4.2796	3.77213	4.49734	0.266783	0.74561	4.2796	3.77213	4.49734	0.266783	0.74561
NCU12050	2.9369	4.2098	2.338	1.01136	-0.923313	2.9369	4.2098	2.338	1.01136	-0.923313
NCU11365	3.54143	4.13995	4.16772	1.6894	-0.0894952	3.54143	4.13995	4.16772	1.6894	-0.0894952
NCU03474	3.16741	3.92507	2.96896	0.157019	-0.53222	3.16741	3.92507	2.96896	0.157019	-0.53222
NCU06165	3.88813	2.60556	2.20324	0.724258	0.08097	3.88813	2.60556	2.20324	0.724258	0.08097
NCU05658	3.67835	3.48075	2.53099	1.78478	-0.302543	3.67835	3.48075	2.53099	1.78478	-0.302543
NCU05184	3.6747	2.81233	2.37306	-0.802572	-0.547864	3.6747	2.81233	2.37306	-0.802572	-0.547864
NCU07597	2.26182	3.47612	2.31771	1.20843	-0.682701	2.26182	3.47612	2.31771	1.20843	-0.682701
NCU05186	3.47126	3.37033	3.10314	1.4662	0.258703	3.47126	3.37033	3.10314	1.4662	0.258703
NCU08186	3.43024	3.31313	2.05136	0.366484	-0.95246	3.43024	3.31313	2.05136	0.366484	-0.95246
NCU09623	6.01944	5.84411	2.21112	4.23822	-0.334019	6.01944	5.84411	2.21112	4.23822	-0.334019
NCU08790	3.25055	4.00455	1.60671	3.50187	-0.376126	3.25055	4.00455	1.60671	3.50187	-0.376126
NCU07652	2.6806	3.51298	-1.58523	3.01898	-0.817329	2.6806	3.51298	-1.58523	3.01898	-0.817329
NCU05170	2.80995	1.70619	1.44719	2.04176	0.127547	2.80995	1.70619	1.44719	2.04176	0.127547
NCU08764	2.32092	2.5425	1.75136	2.51821	0.664372	2.32092	2.5425	1.75136	2.51821	0.664372
NCU05678	3.40786	10.3941	-4.7389	1.12112	2.44806	3.40786	10.3941	-4.7389	1.12112	2.44806
NCU16929	7.60195	5.93459	-0.044375	1.30875	1.41408	7.60195	5.93459	-0.044375	1.30875	1.41408
NCU05106	6.14284		3.24446	3.86672	-0.319776	6.14284		3.24446	3.86672	-0.319776
NCU05097	4.56261	-0.955318	3.10906	3.78998	-0.804987	4.56261	-0.955318	3.10906	3.78998	-0.804987
NCU05903	2.21129	3.04379	2.24841	4.36047	-0.192379	2.21129	3.04379	2.24841	4.36047	-0.192379
NCU07228	4.20327	2.3569	2.37628	2.78347	-0.85647	4.20327	2.3569	2.37628	2.78347	-0.85647
NCU09634	1.64081	7.05671	4.88841	5.12355	-0.971778	1.64081	7.05671	4.88841	5.12355	-0.971778
NCU04694	1.68572	4.03465	2.38087	3.21757	-1.11951	1.68572	4.03465	2.38087	3.21757	-1.11951
NCU07054	5.45083	5.77314	2.80625	1.04472	-2.44191	5.45083	5.77314	2.80625	1.04472	-2.44191
NCU09990	2.73462	2.82728	2.6057	0.225184	-1.49319	2.73462	2.82728	2.6057	0.225184	-1.49319
NCU10285	5.00399	7.56755	-1.88364	4.15599	-3.41765	5.00399	7.56755	-1.88364	4.15599	-3.41765
NCU10502	12.7225	5.2737	2.73491	-0.936552		12.7225	5.2737	2.73491	-0.936552
NCU05470	6.45468	9.72549	0.759506	-1.82657		6.45468	9.72549	0.759506	-1.82657
NCU17203	9.54921	6.04533	5.1548	-2.0782		9.54921	6.04533	5.1548	-2.0782
NCU05467	7.71564	9.09176	-3.16406	-0.393168		7.71564	9.09176	-3.16406	-0.393168
NCU04706	8.87242	7.61339	0.0311739	-2.6474		8.87242	7.61339	0.0311739	-2.6474
NCU04707	8.86783	7.59808	3.15902	0.572819		8.86783	7.59808	3.15902	0.572819
NCU08812	6.1091	8.71952	1.39594	-0.249187		6.1091	8.71952	1.39594	-0.249187
NCU09589	8.6362	6.1733	2.34839	0.564505	0.673296	8.6362	6.1733	2.34839	0.564505	0.673296
NCU04938	3.64485	8.1435	-0.667174	-1.91589		3.64485	8.1435	-0.667174	-1.91589
NCU06888	6.5401	7.82628	2.87202	-1.9656		6.5401	7.82628	2.87202	-1.9656
NCU09148	6.47718	7.77268	3.10131	-2.64588		6.47718	7.77268	3.10131	-2.64588
NCU06889	7.41536	7.34296	0.460855	-1.68281		7.41536	7.34296	0.460855	-1.68281
NCU09046	2.82258	7.27755	1.55267	0.46414	0.856495	2.82258	7.27755	1.55267	0.46414	0.856495
NCU09431	5.8704	7.08204	4.25297	-0.249194		5.8704	7.08204	4.25297	-0.249194
NCU04879	6.65569	2.82161	1.3536	0.1964	0.7951	6.65569	2.82161	1.3536	0.1964	0.7951
NCU05191	4.76071	6.08842	0.785697	-2.50493		4.76071	6.08842	0.785697	-2.50493
NCU06157	5.48059	5.97684	-1.09711	1.0597		5.48059	5.97684	-1.09711	1.0597
NCU05676	4.77079	5.28855	4.09616	1.57719		4.77079	5.28855	4.09616	1.57719
NCU04947	3.15262	5.26573	1.37354	0.320448	0.0214138	3.15262	5.26573	1.37354	0.320448	0.0214138
NCU05655	3.83261	5.23564	-0.0957552	-3.28377	0.680915	3.83261	5.23564	-0.0957552	-3.28377	0.680915
NCU08261	5.13798	4.93593	1.69018	1.34876	0.984454	5.13798	4.93593	1.69018	1.34876	0.984454
NCU08187	3.70935	5.09181	1.04003	1.14378	-0.474647	3.70935	5.09181	1.04003	1.14378	-0.474647
NCU07163	3.72396	4.97193	-1.27753	1.53362		3.72396	4.97193	-1.27753	1.53362
NCU05101	3.68905	4.87277	-0.0728543	2.86945	-0.806929	3.68905	4.87277	-0.0728543	2.86945	-0.806929
NCU17150	3.72569	4.78421	0.5538	-0.662542		3.72569	4.78421	0.5538	-0.662542
NCU07593	4.68834	4.49446	1.167	0.820263	-0.513204	4.68834	4.49446	1.167	0.820263	-0.513204
NCU09455	4.57925	4.28861	-1.46014	-1.63727		4.57925	4.28861	-1.46014	-1.63727
NCU04948	3.03271	4.25668	1.17123	0.676929	0.361807	3.03271	4.25668	1.17123	0.676929	0.361807
NCU09456	3.71489	3.48511	1.81297	1.45727	-0.355462	3.71489	3.48511	1.81297	1.45727	-0.355462
NCU05918	3.44776	2.99587	0.787752	-1.41525	-0.283332	3.44776	2.99587	0.787752	-1.41525	-0.283332
NCU08096	3.33806	2.54757	0.0838368	0.618184	-0.830204	3.33806	2.54757	0.0838368	0.618184	-0.830204
NCU05321	2.75433	2.84367	-1.33119	-1.08543	0.760685	2.75433	2.84367	-1.33119	-1.08543	0.760685
NCU07116	2.59032	2.31993	0.328197	1.67654	-0.831052	2.59032	2.31993	0.328197	1.67654	-0.831052
NCU16930	4.85117	4.24591	-3.6276	-0.350437	1.87613	4.85117	4.24591	-3.6276	-0.350437	1.87613
NCU17042	3.56576	2.23171	3.54932	3.81426	-3.02942	3.56576	2.23171	3.54932	3.81426	-3.02942
NCU07623	3.51591	1.39516	2.51781	3.01099	-1.26448	3.51591	1.39516	2.51781	3.01099	-1.26448
NCU08523	3.31862	0.586869	2.98529	2.54934	-2.03758	3.31862	0.586869	2.98529	2.54934	-2.03758
NCU08522	3.14786	1.81468	2.46012	2.87821	-2.42261	3.14786	1.81468	2.46012	2.87821	-2.42261
NCU04867	12.2245	0.837956	3.02951	-2.21389		12.2245	0.837956	3.02951	-2.21389
NCU04860	10.4049		5.89929	1.19746		10.4049		5.89929	1.19746
NCU08530	7.89339	4.54417	6.76959	2.81618		7.89339	4.54417	6.76959	2.81618
NCU08222	6.80751	5.40861	4.75339	1.08858	0.666976	6.80751	5.40861	4.75339	1.08858	0.666976
NCU06953	6.47941	3.29291	3.83478	1.82079	0.161596	6.47941	3.29291	3.83478	1.82079	0.161596
NCU09953	5.88165	4.6308	2.80805	1.16604	-0.267987	5.88165	4.6308	2.80805	1.16604	-0.267987
NCU08543	5.43334	4.0537	4.21539	-0.387087		5.43334	4.0537	4.21539	-0.387087
NCU08085	5.37173	2.26286	4.18315	0.64573	0.819722	5.37173	2.26286	4.18315	0.64573	0.819722
NCU08087	5.19246	2.59698	4.20904	0.597	-0.163955	5.19246	2.59698	4.20904	0.597	-0.163955
NCU08539	5.15225	0.219224	4.17073	0.458423		5.15225	0.219224	4.17073	0.458423
NCU08089	3.39351	1.03778	4.41881	3.10543		3.39351	1.03778	4.41881	3.10543
NCU05071	3.79082	2.17014	2.5228	0.230613	0.00921298	3.79082	2.17014	2.5228	0.230613	0.00921298
NCU09506	3.56581	0.789973	2.59763	-0.0115679	-0.829613	3.56581	0.789973	2.59763	-0.0115679	-0.829613
NCU11405	3.50151	1.09691	3.00177	0.393168	-0.199281	3.50151	1.09691	3.00177	0.393168	-0.199281
NCU06159	3.48664	0.11451	3.08535	0.571033	0.00469641	3.48664	0.11451	3.08535	0.571033	0.00469641
NCU12068	2.74592	-0.304291	2.34168	0.91589	-0.991272	2.74592	-0.304291	2.34168	0.91589	-0.991272
NCU12067	2.38037	0.453489	2.18883	0.840106	-0.423535	2.38037	0.453489	2.18883	0.840106	-0.423535
NCU05107	4.8326	-1.79979	-0.297798	3.16823	-0.652781	4.8326	-1.79979	-0.297798	3.16823	-0.652781
NCU08223	0.0244005	1.97364	2.54508	1.51534	0.108431	0.0244005	1.97364	2.54508	1.51534	0.108431
NCU16720	-0.301585	2.13633	1.1352	3.34251	-0.645098	-0.301585	2.13633	1.1352	3.34251	-0.645098
NCU09632	0.4342	1.56514	1.81022	3.05599	-0.999582	0.4342	1.56514	1.81022	3.05599	-0.999582
NCU11363	1.18314	2.08229	1.30412	2.45731	-0.360389	1.18314	2.08229	1.30412	2.45731	-0.360389
NCU07095	1.91434	4.08276	-0.323317	-1.68149	2.14054	1.91434	4.08276	-0.323317	-1.68149	2.14054
NCU09613	1.33874	4.01582	0.292444	1.68348	1.17055	1.33874	4.01582	0.292444	1.68348	1.17055
NCU05081	0.322508	1.19972	2.12576	3.19759	-0.589683	0.322508	1.19972	2.12576	3.19759	-0.589683
NCU09304	1.27648	1.21707	2.81745	2.40167	-0.60302	1.27648	1.21707	2.81745	2.40167	-0.60302
NCU09639	5.56632	7.8969	0.372196	0.745173	-3.32523	5.56632	7.8969	0.372196	0.745173	-3.32523
NCU09635	5.77075	7.04226	-1.33979	1.14071	-3.0434	5.77075	7.04226	-1.33979	1.14071	-3.0434
NCU09640	2.97637	6.55897	-0.416566	1.97078	-1.98713	2.97637	6.55897	-0.416566	1.97078	-1.98713
NCU09636	3.66409	6.22445	-2.06452	1.1973	-2.03072	3.66409	6.22445	-2.06452	1.1973	-2.03072
NCU09856	2.7691	1.78587	1.968	0.570707	-1.03948	2.7691	1.78587	1.968	0.570707	-1.03948
NCU09855	3.9993	4.04922	6.41988	-0.343845	-1.63985	3.9993	4.04922	6.41988	-0.343845	-1.63985
NCU05083	3.07913	0.483964	2.18077	1.63357	-2.01537	3.07913	0.483964	2.18077	1.63357	-2.01537
NCU17041	2.1362	1.89956	1.33266	2.73169	-2.48021	2.1362	1.89956	1.33266	2.73169	-2.48021
NCU04869	13.8378	5.70267	0	0		13.8378	5.70267	0	0
NCU08546	8.9692		3.61982	0		8.9692		3.61982	0
NCU08915	7.59466	3.83264	-0.66674	1.54273		7.59466	3.83264	-0.66674	1.54273
NCU06954	7.32486	4.14885	2.31846	3.554		7.32486	4.14885	2.31846	3.554
NCU06901	7.28451	2.53864	2.54323	-3.23255		7.28451	2.53864	2.54323	-3.23255
NCU07633	7.23575		-0.180499	-1.89534		7.23575		-0.180499	-1.89534
NCU07089	6.68996	1.10219	4.31513	2.13299		6.68996	1.10219	4.31513	2.13299
NCU09951	6.39042		4.70402	-0.249185		6.39042		4.70402	-0.249185
NCU09952	6.27655	5.25573	2.30657	-0.480129	0.155256	6.27655	5.25573	2.30657	-0.480129	0.155256
NCU04918	6.20511	4.76205	-0.137524	2.09793	0.721394	6.20511	4.76205	-0.137524	2.09793	0.721394
NCU08547	6.15115		-0.102443	-1.82662		6.15115		-0.102443	-1.82662
NCU04920	6.14234	1.0856	1.43718	1.43157	-0.299265	6.14234	1.0856	1.43718	1.43157	-0.299265
NCU04919	6.13168	4.10045	0.409699	2.2864	-0.488251	6.13168	4.10045	0.409699	2.2864	-0.488251
NCU07212	6.1077	3.28678	-1.90274	-2.09981		6.1077	3.28678	-1.90274	-2.09981
NCU16916	5.88493	3.39386	-1.46173	-1.69464		5.88493	3.39386	-1.46173	-1.69464
NCU08192	5.55297	3.07693	-0.0162799	1.17234		5.55297	3.07693	-0.0162799	1.17234
NCU04877	4.94158	0.856752	-2.51289	-2.7458		4.94158	0.856752	-2.51289	-2.7458
NCU08074	4.92472	4.69363	2.69026	-1.37552		4.92472	4.69363	2.69026	-1.37552
NCU07625	4.8205	2.53864	4.03008	-1.19807		4.8205	2.53864	4.03008	-1.19807
NCU07643	4.44948		0.190441	4.53639	0.447865	4.44948		0.190441	4.53639	0.447865
NCU09966	4.40887	0.267547	1.20719	1.62035	0.4004	4.40887	0.267547	1.20719	1.62035	0.4004
NCU08533	4.36188	-3.70723	1.16261	-1.61394		4.36188	-3.70723	1.16261	-1.61394
NCU05105	4.32498	0.513147	1.12222	1.62633	-0.53816	4.32498	0.513147	1.12222	1.62633	-0.53816
NCU08073	3.92442	2.5813	1.4392	-0.496408	1.29357	3.92442	2.5813	1.4392	-0.496408	1.29357
NCU07641	3.89966		-2.22058	2.91632	0.453783	3.89966		-2.22058	2.91632	0.453783
NCU08084	3.82872		0.731739	0.47425		3.82872		0.731739	0.47425
NCU09907	3.40216	0.617224	2.97541	0.284067	0.275227	3.40216	0.617224	2.97541	0.284067	0.275227
NCU08103	3.20797	-1.63349	1.45475	0.4438	0.743467	3.20797	-1.63349	1.45475	0.4438	0.743467
NCU05098	2.98861	-1.45718	-0.0270444	1.2295	0.000326267	2.98861	-1.45718	-0.0270444	1.2295	0.000326267
NCU04897	2.95952	-0.551871	1.98508	1.38872	0.0405404	2.95952	-0.551871	1.98508	1.38872	0.0405404
NCU05187	2.27824	2.66019	1.88768	0.519195	0.0208646	2.27824	2.66019	1.88768	0.519195	0.0208646
NCU07581	2.40364	-0.131452	2.32497	-1.05082	0.258327	2.40364	-0.131452	2.32497	-1.05082	0.258327
NCU04935	2.37475	-0.190935	0.195741	-0.772487	-0.208902	2.37475	-0.190935	0.195741	-0.772487	-0.208902
NCU05080	2.12758	-0.0910184	-0.237861	0.21197	0.684442	2.12758	-0.0910184	-0.237861	0.21197	0.684442
NCU17043	2.08062	-0.133612	0.777605	-1.33173	-0.252044	2.08062	-0.133612	0.777605	-1.33173	-0.252044
NCU12051	1.84317	4.3454	2.72245	0.875747	-1.77323	1.84317	4.3454	2.72245	0.875747	-1.77323
NCU07149	0.208458	3.96225	-0.122146	5.15852	-2.63059	0.208458	3.96225	-0.122146	5.15852	-2.63059
NCU10039	-0.011832	2.61976	-0.0663645	2.70128	-1.601	-0.011832	2.61976	-0.0663645	2.70128	-1.601
NCU09638	3.2684	12.0595	0.968499	1.82689		3.2684	12.0595	0.968499	1.82689
NCU05469	5.83557	9.86247	-1.24434	-3.92492		5.83557	9.86247	-1.24434	-3.92492
NCU08818	-0.636155	9.15186	-1.64195	-0.334132	0.319227	-0.636155	9.15186	-1.64195	-0.334132	0.319227
NCU05463	3.82768	9.14399	-0.729834	0.0719815	0.156701	3.82768	9.14399	-0.729834	0.0719815	0.156701
NCU05172	1.77933	8.88544	0.490886	2.5636	0.633718	1.77933	8.88544	0.490886	2.5636	0.633718
NCU03473	2.25122	8.34846	-2.43828	-4.21434	0.73072	2.25122	8.34846	-2.43828	-4.21434	0.73072
NCU05479	2.58673	7.65734	-2.11533	-0.426664	0.871305	2.58673	7.65734	-2.11533	-0.426664	0.871305
NCU08802	5.84322	7.5297	-0.0162674	2.19582		5.84322	7.5297	-0.0162674	2.19582
NCU09339	5.96058	7.47457	0	1.98077		5.96058	7.47457	0	1.98077
NCU04708	4.15072	7.34539	-1.39832	-4.07861	0.529185	4.15072	7.34539	-1.39832	-4.07861	0.529185
NCU09593	2.33239	7.25921	0.77374	0.70529	0.737408	2.33239	7.25921	0.77374	0.70529	0.737408
NCU06886	7.17311	6.62041	4.43277	-2.5693		7.17311	6.62041	4.43277	-2.5693
NCU10004	2.76765	7.10841	-0.128738	-3.02556	0.885441	2.76765	7.10841	-0.128738	-3.02556	0.885441
NCU05677	3.22528	6.71483	1.48761	-3.46462		3.22528	6.71483	1.48761	-3.46462
NCU08836	5.57123	6.68624	3.7741	1.96746		5.57123	6.68624	3.7741	1.96746
NCU07130	-1.53603	6.52707	-1.68618	1.10833	1.18456	-1.53603	6.52707	-1.68618	1.10833	1.18456
NCU10344	2.58507	6.41609	0.189335	-0.34285	0.399608	2.58507	6.41609	0.189335	-0.34285	0.399608
NCU09189	2.67299	6.3614	0.0766116	-0.110866	0.510227	2.67299	6.3614	0.0766116	-0.110866	0.510227
NCU09338	3.49831	6.1692	1.3979	1.17218		3.49831	6.1692	1.3979	1.17218
NCU05173	2.11645	6.07934	1.81681	3.71221	-0.132607	2.11645	6.07934	1.81681	3.71221	-0.132607
NCU03581	2.27346	6.03257	-0.75054	-0.983448		2.27346	6.03257	-0.75054	-0.983448
NCU05679	0.237002	5.94105	-2.11714	-1.39608		0.237002	5.94105	-2.11714	-1.39608
NCU08813	5.07145	5.57666	-0.0162806	1.2338		5.07145	5.57666	-0.0162806	1.2338
NCU03469		5.50412					5.50412
NCU09620	2.16663	5.45408	-1.87668	1.337	0.0831774	2.16663	5.45408	-1.87668	1.337	0.0831774
NCU08814	1.66296	4.91259	-3.01425	-3.24716		1.66296	4.91259	-3.01425	-3.24716
NCU07051	2.26904	4.78152	-0.152819	1.77566	0.459449	2.26904	4.78152	-0.152819	1.77566	0.459449
NCU05004	1.96781	4.76658	2.65134	1.52142	0.405017	1.96781	4.76658	2.65134	1.52142	0.405017
NCU09491	-1.01511	4.47004	-0.1777	1.61503	0.657959	-1.01511	4.47004	-0.1777	1.61503	0.657959
NCU07055	1.95426	4.46875	-0.2718	0.866795	-0.443623	1.95426	4.46875	-0.2718	0.866795	-0.443623
NCU05673	1.32822	4.45457	-2.49396	-1.22286		1.32822	4.45457	-2.49396	-1.22286
NCU07053	0.510706	4.29495	-0.206954	1.12055	0.63152	0.510706	4.29495	-0.206954	1.12055	0.63152
NCU05164	-0.611335	4.22986	-0.465787	-0.410943		-0.611335	4.22986	-0.465787	-0.410943
NCU09484	1.80551	3.62173	1.6237	1.57157	0.435923	1.80551	3.62173	1.6237	1.57157	0.435923
NCU09278	-0.112781	3.53511	-1.3857	-2.09635	0.502123	-0.112781	3.53511	-1.3857	-2.09635	0.502123
NCU05018	1.25563	3.47991	0.543146	0.663447	0.530041	1.25563	3.47991	0.543146	0.663447	0.530041
NCU09857	1.35169	3.31093	1.98834	0.299909	-0.875059	1.35169	3.31093	1.98834	0.299909	-0.875059
NCU17066	0.213471	2.82916	-0.155876	1.08424	-0.591661	0.213471	2.82916	-0.155876	1.08424	-0.591661
NCU09279	1.18454	2.78229	0.102071	0.0739928	0.361726	1.18454	2.78229	0.102071	0.0739928	0.361726
NCU04691	1.06959	2.78145	-0.262018	1.71138	-0.430448	1.06959	2.78145	-0.262018	1.71138	-0.430448
NCU10641	1.74594	2.69679	-0.0456144	1.9911	-0.420525	1.74594	2.69679	-0.0456144	1.9911	-0.420525
NCU08188	1.72974	2.58588	-1.34462	0.872279	-0.640085	1.72974	2.58588	-1.34462	0.872279	-0.640085
NCU09724	1.32602	2.57901	0.737299	1.033	-0.099164	1.32602	2.57901	0.737299	1.033	-0.099164
NCU05183	0.362105	2.43407	-1.55541	-1.96335	0.333058	0.362105	2.43407	-1.55541	-1.96335	0.333058
NCU07242	1.22328	2.40422	1.3438	1.23132	-0.657732	1.22328	2.40422	1.3438	1.23132	-0.657732
NCU08752	-0.654088	2.39618	-1.03765	0.852487	-0.211331	-0.654088	2.39618	-1.03765	0.852487	-0.211331
NCU05017	1.79643	2.39108	0.489372	-0.0811386	0.0769117	1.79643	2.39108	0.489372	-0.0811386	0.0769117
NCU11364	1.57992	2.28258	1.61518	1.07676	-0.270198	1.57992	2.28258	1.61518	1.07676	-0.270198
NCU10539	1.59087	2.00812	1.38318	-0.989702	0.182356	1.59087	2.00812	1.38318	-0.989702	0.182356
NCU07235	0.861532	1.99729	0.00230097	-0.509627	0.685057	0.861532	1.99729	0.00230097	-0.509627	0.685057
NCU09698	-0.437689	1.5588	-1.10395	-0.0916707	0.0584175	-0.437689	1.5588	-1.10395	-0.0916707	0.0584175
NCU07094	-1.77245	3.29248	-5.7214	0.483999	3.3233	-1.77245	3.29248	-5.7214	0.483999	3.3233
NCU07049	-0.536184	1.05802	-2.484	0.625441	2.36364	-0.536184	1.05802	-2.484	0.625441	2.36364
NCU07596	1.57319	-0.437998	2.31418	2.2055	-1.78663	1.57319	-0.437998	2.31418	2.2055	-1.78663
NCU07050	-1.30294	2.14547	-2.38954	0.482359	2.29377	-1.30294	2.14547	-2.38954	0.482359	2.29377
NCU07217	2.17114	0.294744	1.11081	4.6482	-1.08769	2.17114	0.294744	1.11081	4.6482	-1.08769
NCU09660	1.67661	4.54743	1.60958	3.44635	-0.294028	1.67661	4.54743	1.60958	3.44635	-0.294028
NCU07144	1.07744	4.29613	-1.18546	4.12228	-0.791165	1.07744	4.29613	-1.18546	4.12228	-0.791165
NCU07218	-2.97208	-0.951369	-1.40359	3.55584	-0.36535	-2.97208	-0.951369	-1.40359	3.55584	-0.36535
NCU08521	1.23704	-0.0562599	2.13492	3.31866	-1.24087	1.23704	-0.0562599	2.13492	3.31866	-1.24087
NCU07140	1.196	2.89178	-0.53978	2.4085	0.0348057	1.196	2.89178	-0.53978	2.4085	0.0348057
NCU05908	0.967066	0.700972	0.203532	2.51914	0.575737	0.967066	0.700972	0.203532	2.51914	0.575737
NCU09495	-1.99541	0.52934	-1.7108	2.463	0.357608	-1.99541	0.52934	-1.7108	2.463	0.357608
NCU09293	0.0192476	1.82494	1.79401	2.06735	-0.938165	0.0192476	1.82494	1.79401	2.06735	-0.938165
NCU09490	-1.09591	1.42791	-0.242304	2.02554	0.992801	-1.09591	1.42791	-0.242304	2.02554	0.992801
NCU04852	1.89475	0.308821	-1.92345	1.47304	1.46807	1.89475	0.308821	-1.92345	1.47304	1.46807
NCU04951	-0.521541	-0.134773	-1.48372	0.303279	1.85625	-0.521541	-0.134773	-1.48372	0.303279	1.85625
NCU05900	-1.78861	0.0503555	-1.67666	0.183064	1.63283	-1.78861	0.0503555	-1.67666	0.183064	1.63283
NCU11292	-0.572749	0.421404	-0.866845	0.79359	1.60059	-0.572749	0.421404	-0.866845	0.79359	1.60059
NCU09961	-0.621541	0.0866212	-3.69765	-2.51412	1.48619	-0.621541	0.0866212	-3.69765	-2.51412	1.48619
NCU08763	-1.20632	0.0319655	-0.839401	0.574255	1.41783	-1.20632	0.0319655	-0.839401	0.574255	1.41783
NCU08797	4.90926	3.06428	-0.161483	1.9964	-1.10021	4.90926	3.06428	-0.161483	1.9964	-1.10021
NCU09637	2.31667	4.3772	-1.35472	1.3082	-1.68454	2.31667	4.3772	-1.35472	1.3082	-1.68454
NCU08569	3.09514	3.87019	-1.00859	2.53795	-1.42204	3.09514	3.87019	-1.00859	2.53795	-1.42204
NCU08100	3.39066	1.37415	1.83088	0.327678	-3.01892	3.39066	1.37415	1.83088	0.327678	-3.01892
NCU05102	3.01254	1.60353	0.961201	1.0212	-1.40304	3.01254	1.60353	0.961201	1.0212	-1.40304
NCU09956	2.73348	-0.0548968	1.61655	1.27124	-2.18601	2.73348	-0.0548968	1.61655	1.27124	-2.18601
NCU08099	2.68387	0.809447	1.74373	0.115006	-3.07667	2.68387	0.809447	1.74373	0.115006	-3.07667
NCU09955	2.57896	0.597423	1.32041	0.879685	-1.8388	2.57896	0.597423	1.32041	0.879685	-1.8388
NCU08097	2.13302	1.61614	1.28968	1.26488	-1.8862	2.13302	1.61614	1.28968	1.26488	-1.8862
NCU05114	2.05353	-0.410052	1.37621	0.341544	-1.19909	2.05353	-0.410052	1.37621	0.341544	-1.19909
NCU07609	2.01251	0.0827028	0.285495	1.02477	-1.65153	2.01251	0.0827028	0.285495	1.02477	-1.65153
NCU09171	-2.5574	5.67465	-4.3089	1.6804	-1.14571	-2.5574	5.67465	-4.3089	1.6804	-1.14571
NCU09151	-0.108457	3.54284	0.519244	0.981712	-1.0174	-0.108457	3.54284	0.519244	0.981712	-1.0174
NCU10040	-0.138292	2.24658	-1.49998	1.89662	-2.2038	-0.138292	2.24658	-1.49998	1.89662	-2.2038
NCU10038	0.329601	2.15229	0.392418	1.89176	-1.37673	0.329601	2.15229	0.392418	1.89176	-1.37673
NCU09178	0.534784	0.438706	-0.898964	3.33234	-1.44668	0.534784	0.438706	-0.898964	3.33234	-1.44668
NCU04991	0.171072	-1.22317	-0.172738	3.07147	-1.94386	0.171072	-1.22317	-0.172738	3.07147	-1.94386
NCU09305	-0.723091	-0.0167499	-1.13458	2.2759	-1.11957	-0.723091	-0.0167499	-1.13458	2.2759	-1.11957
NCU07511	0.982458	0.583331	0.645479	2.04434	-1.80752	0.982458	0.583331	0.645479	2.04434	-1.80752
NCU09187	-0.262466	-0.996578	0.420665	2.02917	-2.18102	-0.262466	-0.996578	0.420665	2.02917	-2.18102
NCU09947	-0.713483	-0.98535	-1.10082	2.02516	-1.6049	-0.713483	-0.98535	-1.10082	2.02516	-1.6049
NCU08916	9.34834	0.163605	2.54773	2.28381		9.34834	0.163605	2.54773	2.28381
NCU08917	6.71085		-2.52767	-1.24054	0.150736	6.71085		-2.52767	-1.24054	0.150736
NCU04870	6.65362	1.4318	-3.51344	-3.74635		6.65362	1.4318	-3.51344	-3.74635
NCU08548	6.45038	-0.141108	-0.0162699	-0.24918		6.45038	-0.141108	-0.0162699	-0.24918
NCU07227	6.38966	3.03005	-0.0162334	-0.249141		6.38966	3.03005	-0.0162334	-0.249141
NCU06897	6.31516	3.433	0.780991	-0.982241		6.31516	3.433	0.780991	-0.982241
NCU07147	-0.0869391		-1.12313	6.31073	-1.12965	-0.0869391		-1.12313	6.31073	-1.12965
NCU06955	6.20041		0	1.88621		6.20041		0	1.88621
NCU07646	6.1809		0	0		6.1809		0	0
NCU04882	6.13939	0.856752	-0.016267	-0.249177		6.13939	0.856752	-0.016267	-0.249177
NCU07104	6.11422	2.53864	-0.016236	-0.249144		6.11422	2.53864	-0.016236	-0.249144
NCU09835	5.8077		-1.19375	-1.42666		5.8077		-1.19375	-1.42666
NCU10644	5.65818	2.46869	0	0		5.65818	2.46869	0	0
NCU06898	5.58654	2.46869	0	0		5.58654	2.46869	0	0
NCU06161	5.51142	4.6308	2.2386	0		5.51142	4.6308	2.2386	0
NCU08833	3.72901	5.41366	0	0		3.72901	5.41366	0	0
NCU04689	2.77183	5.40861	-0.115467	-1.3102		2.77183	5.40861	-0.115467	-1.3102
NCU07207	2.91573	5.39916	-1.80629	1.01241		2.91573	5.39916	-1.80629	1.01241
NCU05462	-2.32674	5.38036	-2.39737	3.4706	-0.45919	-2.32674	5.38036	-2.39737	3.4706	-0.45919
NCU06896	5.36146	3.83264	-2.84764	-3.08055		5.36146	3.83264	-2.84764	-3.08055
NCU08845	3.21976	5.27611	2.11215	0		3.21976	5.27611	2.11215	0
NCU09453	3.00768	5.27611	-0.0162651	-0.249173		3.00768	5.27611	-0.0162651	-0.249173
NCU09950	5.25378	2.46869	3.95471	-2.08812		5.25378	2.46869	3.95471	-2.08812
NCU07085	5.23858		2.10969	0		5.23858		2.10969	0
NCU05466	-1.19581	5.17462	-2.69121	2.20072	-0.91105	-1.19581	5.17462	-2.69121	2.20072	-0.91105
NCU12076	4.97203	5.14165	0	0		4.97203	5.14165	0	0
NCU05178	-0.0965696	5.13033	-3.61142	-3.84433	0.738526	-0.0965696	5.13033	-3.61142	-3.84433	0.738526
NCU07107	2.76856	5.13033	-0.27048	0.914594	-1.18727	2.76856	5.13033	-0.27048	0.914594	-1.18727
NCU09949	5.07053		-0.0162457	-0.249153		5.07053		-0.0162457	-0.249153
NCU07148	-1.20656		-2.69659	5.01455	-1.29276	-1.20656		-2.69659	5.01455	-1.29276
NCU07105	4.94364	3.86235	-0.749466	-0.982376		4.94364	3.86235	-0.749466	-0.982376
NCU07087	4.85948	4.07708	4.05723	-0.399373		4.85948	4.07708	4.05723	-0.399373
NCU07647	4.85681		-1.93349	-2.1664		4.85681		-1.93349	-2.1664
NCU08912	4.82144		-1.54329	-1.7762		4.82144		-1.54329	-1.7762
NCU07151	3.51936	4.76205	-1.14796	3.30588	0.442001	3.51936	4.76205	-1.14796	3.30588	0.442001
NCU08086	4.05964		4.70391	1.16992		4.05964		4.70391	1.16992
NCU08757	3.33798	4.6465	0.333337	-0.427382		3.33798	4.6465	0.333337	-0.427382
NCU08865	2.28061	4.60961	-1.56994	-1.80285		2.28061	4.60961	-1.56994	-1.80285
NCU05675	4.59314	4.30617	1.8132	-0.983379		4.59314	4.30617	1.8132	-0.983379
NCU16924	4.59148	3.03005	-0.0162671	-0.249177		4.59148	3.03005	-0.0162671	-0.249177
NCU05100	2.33493	4.48632	-2.34144	-0.0437514	-0.505255	2.33493	4.48632	-2.34144	-0.0437514	-0.505255
NCU03470	-2.58395	4.46874	-2.65461	-0.442091	0.300587	-2.58395	4.46874	-2.65461	-0.442091	0.300587
NCU06887	2.65783	4.46874	-1.19378	-1.42669		2.65783	4.46874	-1.19378	-1.42669
NCU09836	2.79131	4.46874	-1.24071	-0.59046		2.79131	4.46874	-1.24071	-0.59046
NCU06899	4.41022	3.07693	2.22778	-2.57353		4.41022	3.07693	2.22778	-2.57353
NCU08102	3.38431	4.32632	-0.0888924	1.04762		3.38431	4.32632	-0.0888924	1.04762
NCU07480	3.38638	4.31596	0.118984	-1.52314		3.38638	4.31596	0.118984	-1.52314
NCU04916	4.27274	4.00553	-1.18459	-2.94121		4.27274	4.00553	-1.18459	-2.94121
NCU12077	3.85261	4.24545	-2.69947	-2.93238		3.85261	4.24545	-2.69947	-2.93238
NCU03582	2.35526	4.24355	0.664679	-1.93469		2.35526	4.24355	0.664679	-1.93469
NCU07211	-2.91979	4.22426	-1.58363	-3.22335		-2.91979	4.22426	-1.58363	-3.22335
NCU06903	4.1847	2.97904	-0.46266	-2.10312		4.1847	2.97904	-0.46266	-2.10312
NCU03475	3.29646	4.17334	-1.3546	-0.0486558	0.589781	3.29646	4.17334	-1.3546	-0.0486558	0.589781
NCU07086	3.695	2.53864	4.1276	0.992332		3.695	2.53864	4.1276	0.992332
NCU07648	3.71559	4.09819	-1.16918	-3.84779	0.859594	3.71559	4.09819	-1.16918	-3.84779	0.859594
NCU08221	3.81249	4.07978	-3.43189	-3.6648		3.81249	4.07978	-3.43189	-3.6648
NCU08885	3.64176	4.06582	0.684442	-1.0687		3.64176	4.06582	0.684442	-1.0687
NCU10427	0.939666	4.0537	0.925521	1.61178		0.939666	4.0537	0.925521	1.61178
NCU12052	1.56126	4.02997	1.75716	-1.04563		1.56126	4.02997	1.75716	-1.04563
NCU05910	0.2568	4.00553	-0.953568	-2.83051	1.19027	0.2568	4.00553	-0.953568	-2.83051	1.19027
NCU07092	3.89278	2.39599	0.833995	-0.973771		3.89278	2.39599	0.833995	-0.973771
NCU07653	3.87702		2.25181	0		3.87702		2.25181	0
NCU12045	3.05068	3.86235	1.63593	-2.58901		3.05068	3.86235	1.63593	-2.58901
NCU10037	-2.70775	0.830309	-2.81527	3.85514	-1.32234	-2.70775	0.830309	-2.81527	3.85514	-1.32234
NCU12078	3.54999	3.83264	-1.53681	-1.76971		3.54999	3.83264	-1.53681	-1.76971
NCU16906	2.44004	3.80469	-1.27101	0.0811849	0.804537	2.44004	3.80469	-1.27101	0.0811849	0.804537
NCU04876	3.77989		0	0		3.77989		0	0
NCU16745	2.02327	3.72332	-1.98483	-2.18745	0.361363	2.02327	3.72332	-1.98483	-2.18745	0.361363
NCU17282	-3.57992	3.71561	-2.24513	-2.4688	1.30307	-3.57992	3.71561	-2.24513	-2.4688	1.30307
NCU08260	3.65482		0.373109	-2.76976		3.65482		0.373109	-2.76976
NCU08881	0.359996	3.63059	-1.45397	-0.772457	0.0696184	0.359996	3.63059	-1.45397	-0.772457	0.0696184
NCU07229	0.583501	3.54021	1.83536	-2.09105		0.583501	3.54021	1.83536	-2.09105
NCU09586	-0.668063	3.54021	-3.69207	-3.92498	0.575298	-0.668063	3.54021	-3.69207	-3.92498	0.575298
NCU04705	3.48236	3.50363	1.12873	-1.42668		3.48236	3.50363	1.12873	-1.42668
NCU07638	3.49954		-4.11611	-1.34655	0.843744	3.49954		-4.11611	-1.34655	0.843744
NCU08571	0		0	3.4718		0		0	3.4718
NCU09184	-0.716885	3.46872	-3.63701	-5.28219	1.29592	-0.716885	3.46872	-3.63701	-5.28219	1.29592
NCU11286	3.19652	3.46872	-0.367185	0.711526	0.493846	3.19652	3.46872	-0.367185	0.711526	0.493846
NCU05659	1.29248	3.03005	1.13035	3.4584	0.328838	1.29248	3.03005	1.13035	3.4584	0.328838
NCU06885	-2.0453	3.433	-2.11589	-2.34879		-2.0453	3.433	-2.11589	-2.34879
NCU08182	-2.77708	3.433	-2.84773	-3.08064		-2.77708	3.433	-2.84773	-3.08064
NCU07209	1.83597	3.42982	-0.859498	1.07937	0.665351	1.83597	3.42982	-0.859498	1.07937	0.665351
NCU17283	2.77372	3.39386	-1.10623	-1.33914		2.77372	3.39386	-1.10623	-1.33914
NCU05674	0.64822	3.39052	-2.76314	-4.51109	0.821454	0.64822	3.39052	-2.76314	-4.51109	0.821454
NCU04894	3.33608	0.163605	-1.29089	-1.5238		3.33608	0.163605	-1.29089	-1.5238
NCU08789	3.31808	2.66187	-0.874828	2.59639	0.242793	3.31808	2.66187	-0.874828	2.59639	0.242793
NCU05110	3.31375		-0.46187	-3.14041		3.31375		-0.46187	-3.14041
NCU08259	3.29798		-0.750528	-0.983436		3.29798		-0.750528	-0.983436
NCU07645	3.29455		-4.56435	-4.79726	0.31149	3.29455		-4.56435	-4.79726	0.31149
NCU05104	2.58008	1.10219	0.437995	3.22138	0.197573	2.58008	1.10219	0.437995	3.22138	0.197573
NCU07595	3.21937	-1.57436	-2.03661	-3.68597		3.21937	-1.57436	-2.03661	-3.68597
NCU07090	3.215		-0.932081	-2.56966		3.215		-0.932081	-2.56966
NCU07225	1.43649	3.17277	-1.59904	1.52203	0.932317	1.43649	3.17277	-1.59904	1.52203	0.932317
NCU07640	3.11195		-1.54755	1.66504		3.11195		-1.54755	1.66504
NCU09948	3.10451		0.665374	2.13077		3.10451		0.665374	2.13077
NCU07106	1.93566	3.07693	-1.85525	-2.08815		1.93566	3.07693	-1.85525	-2.08815
NCU08116	0.252529	3.07693	0.705062	0.478154		0.252529	3.07693	0.705062	0.478154
NCU09585	2.11214	3.07693	-3.3347	-3.56761		2.11214	3.07693	-3.3347	-3.56761
NCU16614	-3.2846	3.07693	-3.35526	0.880623	1.08706	-3.2846	3.07693	-3.35526	0.880623	1.08706
NCU08801	0.892901	3.05206	-0.682154	-0.915062		0.892901	3.05206	-0.682154	-0.915062
NCU07216	0.86873	3.03005	-3.23116	-0.404798	0.575028	0.86873	3.03005	-3.23116	-0.404798	0.575028
NCU09851	3.02505	1.70523	1.07636	-0.749595		3.02505	1.70523	1.07636	-0.749595
NCU16926	3.00768		-0.0162651	-0.249173		3.00768		-0.0162651	-0.249173
NCU08753	0.155526	2.97904	-1.32587	-2.11512	0.800421	0.155526	2.97904	-1.32587	-2.11512	0.800421
NCU09837	2.18266	2.96456	-1.48055	-3.1391	-0.259002	2.18266	2.96456	-1.48055	-3.1391	-0.259002
NCU04701	1.19809	2.91271	-0.824541	0.193088	0.418002	1.19809	2.91271	-0.824541	0.193088	0.418002
NCU08109	2.8728	2.17947	0.231676	-2.5468		2.8728	2.17947	0.231676	-2.5468
NCU09612	-1.96488	2.86822	-0.966132	1.03205	0.218865	-1.96488	2.86822	-0.966132	1.03205	0.218865
NCU08078	2.86603	1.17308	-1.25338	-2.99113		2.86603	1.17308	-1.25338	-2.99113
NCU09577	2.75733		-2.34249	-0.0452955		2.75733		-2.34249	-0.0452955
NCU05175	0.433118	2.71208	-2.19871	-3.94711		0.433118	2.71208	-2.19871	-3.94711
NCU08200	0.054335		1.53039	2.68688		0.054335		1.53039	2.68688
NCU04896	2.66884		1.567	-2.41393		2.66884		1.567	-2.41393
NCU08532	2.65957	-2.29837	-1.1902	-4.36138	1.04517	2.65957	-2.29837	-1.1902	-4.36138	1.04517
NCU04709	2.59708		-1.19378	-1.42669		2.59708		-1.19378	-1.42669
NCU12137	2.5405	0.526965	-0.581685	-1.87418		2.5405	0.526965	-0.581685	-1.87418
NCU04926	0.00803973	2.53864	-3.8436	-4.07651		0.00803973	2.53864	-3.8436	-4.07651
NCU16925		2.53864					2.53864
NCU05671	-0.00899548	2.52297	-0.977279	0.303198	0.968064	-0.00899548	2.52297	-0.977279	0.303198	0.968064
NCU08254	2.48894		-1.30058	-2.94192		2.48894		-1.30058	-2.94192
NCU04704	0.824555	2.46869	-0.750557	-0.983465		0.824555	2.46869	-0.750557	-0.983465
NCU07594	-0.398545	2.46869	-3.52273	-3.75563		-0.398545	2.46869	-3.52273	-3.75563
NCU09988	0.292763	2.46869	0.483477	0.935598	0.572873	0.292763	2.46869	0.483477	0.935598	0.572873
NCU08799	1.55881	2.39599	-0.0162786	-0.249186		1.55881	2.39599	-0.0162786	-0.249186
NCU09452	0.739323	2.39599	-0.750558	-0.983466		0.739323	2.39599	-0.750558	-0.983466
NCU05091	2.3774		-2.69656	-2.92946		2.3774		-2.69656	-2.92946
NCU05112	2.32951		0.662546	0.515511		2.32951		0.662546	0.515511
NCU05158	2.31398	1.85472	1.24307	0.0307585		2.31398	1.85472	1.24307	0.0307585
NCU09487	-0.631519	2.3107	-1.75109	0.256275	0.309293	-0.631519	2.3107	-1.75109	0.256275	0.309293
NCU04700	2.28013		0	0		2.28013		0	0
NCU04875	2.27342		-0.75054	-0.983448		2.27342		-0.75054	-0.983448
NCU17137	0.521673	2.24951	0.710599	0.63837	-0.478937	0.521673	2.24951	0.710599	0.63837	-0.478937
NCU08576	2.2286		-0.344975	0.255279		2.2286		-0.344975	0.255279
NCU09172	0.302755	2.21368	-0.812668	0.702133	-0.322843	0.302755	2.21368	-0.812668	0.702133	-0.322843
NCU07642	2.19494		0	1.99208		2.19494		0	1.99208
NCU09591	2.19494		0	1.88619		2.19494		0	1.88619
NCU05056	2.19127		-0.580098	-2.35305		2.19127		-0.580098	-2.35305
NCU05096	2.18966	1.17308	0.730291	0.492587	0.333818	2.18966	1.17308	0.730291	0.492587	0.333818
NCU08250	2.17456	-0.553412	1.98465	1.23268	0.288763	2.17456	-0.553412	1.98465	1.23268	0.288763
NCU08079	1.8981		2.17326	-2.13006		1.8981		2.17326	-2.13006
NCU09645	0.38087	2.15381	-1.18056	-3.95178	0.319947	0.38087	2.15381	-1.18056	-3.95178	0.319947
NCU16600	0		2.10967	0		0		2.10967	0
NCU07224	0.194221	2.10433	-1.26175	0.609185	0.792171	0.194221	2.10433	-1.26175	0.609185	0.792171
NCU08106	2.0906	-2.44536	-3.25275	-3.48566		2.0906	-2.44536	-3.25275	-3.48566
NCU09965	1.12641	2.08653	-3.74002	-3.97293	0.701534	1.12641	2.08653	-3.74002	-3.97293	0.701534
NCU05662	-0.42416		2.06911	0.686308		-0.42416		2.06911	0.686308
NCU09180	1.54743	2.04803	-1.30961	0.427733		1.54743	2.04803	-1.30961	0.427733
NCU08780	2.02769	1.25606	-2.61869	-2.85161		2.02769	1.25606	-2.61869	-2.85161
NCU08918	2.01329	-1.01701	0.518323	1.28239	-0.591452	2.01329	-1.01701	0.518323	1.28239	-0.591452
NCU04853	2.01226		-0.676342	0.124125		2.01226		-0.676342	0.124125
NCU08105	1.97253		-1.10335	-1.33626		1.97253		-1.10335	-1.33626
NCU05108	1.94526		-2.69656	-2.92947		1.94526		-2.69656	-2.92947
NCU08431	1.08982	1.13725	-1.02906	1.88949	-0.0217017	1.08982	1.13725	-1.02906	1.88949	-0.0217017
NCU07226	-1.02717	0.888844	-1.53818	1.86432	1.02153	-1.02717	0.888844	-1.53818	1.86432	1.02153
NCU05086	1.84591	0.033407	-2.144	-0.196308	1.12677	1.84591	0.033407	-2.144	-0.196308	1.12677
NCU03472	1.2589	1.79807	-0.873872	0.740562	-0.635451	1.2589	1.79807	-0.873872	0.740562	-0.635451
NCU04690	-0.205891	1.08536	-0.432615	1.79348	-0.37383	-0.205891	1.08536	-0.432615	1.79348	-0.37383
NCU05896	-1.64378	1.77618	0.214838	-0.243306	0.810127	-1.64378	1.77618	0.214838	-0.243306	0.810127
NCU17172	1.7642		0.796178	-0.983454		1.7642		0.796178	-0.983454
NCU05909	1.75832	1.38577	1.46081	0.567658	-0.378921	1.75832	1.38577	1.46081	0.567658	-0.378921
NCU04949	1.71255	0.83842	0.559349	0.196104	0.203597	1.71255	0.83842	0.559349	0.196104	0.203597
NCU08101	1.70716		-1.25483	-0.980542	0.33185	1.70716		-1.25483	-0.980542	0.33185
NCU08800	1.47359	1.70523	-0.0162794	-0.249187		1.47359	1.70523	-0.0162794	-0.249187
NCU04934	1.6993	1.61848	1.05312	0.125728	0.112863	1.6993	1.61848	1.05312	0.125728	0.112863
NCU07145	-1.78463		-1.85528	1.69789	-1.22523	-1.78463		-1.85528	1.69789	-1.22523
NCU07230	-1.57239	-2.22911	0.671567	1.69262	0.208988	-1.57239	-2.22911	0.671567	1.69262	0.208988
NCU17264	0.489608	1.68672	-0.851894	0.0371294	0.441088	0.489608	1.68672	-0.851894	0.0371294	0.441088
NCU08639	-1.81262	-2.44536	-1.88322	1.66924	-0.3052	-1.81262	-2.44536	-1.88322	1.66924	-0.3052
NCU05165	1.65103	0.498911	1.40188	1.03027	-0.345618	1.65103	0.498911	1.40188	1.03027	-0.345618
NCU16744	1.62576		-2.85094	-3.08385		1.62576		-2.85094	-3.08385
NCU16724	0.868924	1.61848	-1.71103	-0.370233	-0.0531447	0.868924	1.61848	-1.71103	-0.370233	-0.0531447
NCU10605	-0.611536	-0.141108	-0.682166	1.61785		-0.611536	-0.141108	-0.682166	1.61785
NCU05113	-0.668002	-0.493608	-1.11697	1.61773	-0.316307	-0.668002	-0.493608	-1.11697	1.61773	-0.316307
NCU07133	1.61329	0.476643	1.06675	0.785415	0.271435	1.61329	0.476643	1.06675	0.785415	0.271435
NCU07099	-0.103069	0.87778	-2.50749	1.59874		-0.103069	0.87778	-2.50749	1.59874
NCU09275	1.57261		-1.5508	-0.367878		1.57261		-1.5508	-0.367878
NCU02867	1.55876		-0.0162786	-0.249186		1.55876		-0.0162786	-0.249186
NCU05155	1.54917	0.55154	-2.0925	-0.671762	-1.23236	1.54917	0.55154	-2.0925	-0.671762	-1.23236
NCU08189	0.149905	0.350144	-0.410529	1.54857	-0.382148	0.149905	0.350144	-0.410529	1.54857	-0.382148
NCU04884	1.32644	-1.19448	0.803348	1.54364	-0.742015	1.32644	-1.19448	0.803348	1.54364	-0.742015
NCU08081	1.53803		-1.53683	-1.76973		1.53803		-1.53683	-1.76973
NCU08242	1.53666		-1.53836	-1.77126		1.53666		-1.53836	-1.77126
NCU04994	0.668159	0.659116	-0.848007	1.53445	-0.933341	0.668159	0.659116	-0.848007	1.53445	-0.933341
NCU09173	1.5344	0.983053	1.33133	0.589883	0.546447	1.5344	0.983053	1.33133	0.589883	0.546447
NCU17263	-0.396598	1.51735	-1.96033	0.0995997	0.762156	-0.396598	1.51735	-1.96033	0.0995997	0.762156
NCU07582	1.49684	-0.443386	0.979278	-0.319871	-0.671402	1.49684	-0.443386	0.979278	-0.319871	-0.671402
NCU08884	1.49283	1.281	-1.63045	-1.86336		1.49283	1.281	-1.63045	-1.86336
NCU07622	1.4848	0.288425	0.52266	1.19618	-0.00244473	1.4848	0.288425	0.52266	1.19618	-0.00244473
NCU09839	1.47612	0.725136	-0.131155	0.885443	-0.0897851	1.47612	0.725136	-0.131155	0.885443	-0.0897851
NCU05073	1.47361		-0.0162794	-0.249187		1.47361		-0.0162794	-0.249187
NCU16927	1.47359		-0.0162794	-0.249187		1.47359		-0.0162794	-0.249187
NCU07601	-0.785512		1.46637	-1.08905		-0.785512		1.46637	-1.08905
NCU07631	1.45231		-2.33896	-2.57187		1.45231		-2.33896	-2.57187
NCU04888	1.44738	0.758328	-1.43132	0.560597	0.91854	1.44738	0.758328	-1.43132	0.560597	0.91854
NCU08076	-0.470377	0.0867255	-0.340038	1.44196	-0.291282	-0.470377	0.0867255	-0.340038	1.44196	-0.291282
NCU09913	1.42541	0.891598	-1.04506	0.977181	0.906451	1.42541	0.891598	-1.04506	0.977181	0.906451
NCU16611	-0.717385		-0.787973	1.42259		-0.717385		-0.787973	1.42259
NCU07103	1.38931	0.895813	-2.6853	-2.91821		1.38931	0.895813	-2.6853	-2.91821
NCU05059	1.38514		-1.30462	-2.94763		1.38514		-1.30462	-2.94763
NCU08107	1.38106		-1.82072	-3.45898		1.38106		-1.82072	-3.45898
NCU09276	1.37899	0.203186	-0.446615	-0.929145	-0.295587	1.37899	0.203186	-0.446615	-0.929145	-0.295587
NCU07797	-1.0787	1.3758	-1.82823	-1.46564	0.721706	-1.0787	1.3758	-1.82823	-1.46564	0.721706
NCU07111	0.0757613	0.654093	0.445489	1.37244	0.5392	0.0757613	0.654093	0.445489	1.37244	0.5392
NCU05159	0.677217	1.3645	0.895795	0.585033	0.18104	0.677217	1.3645	0.895795	0.585033	0.18104
NCU09588	1.32098		-1.1938	-1.42671		1.32098		-1.1938	-1.42671
NCU09519	-1.46166	0.505446	-0.500175	1.3203	-0.68975	-1.46166	0.505446	-0.500175	1.3203	-0.68975
NCU08225	0.951439	-0.518289	1.30068	0.221414	-0.239853	0.951439	-0.518289	1.30068	0.221414	-0.239853
NCU05060	-1.0588	-1.2977	-0.834998	1.29789	-0.828706	-1.0588	-1.2977	-0.834998	1.29789	-0.828706
NCU07143	-1.37004	-0.0954792	0.302446	1.295	0.593958	-1.37004	-0.0954792	0.302446	1.295	0.593958
NCU05063	0.357638	-0.323116	-1.0294	1.27446	-0.229998	0.357638	-0.323116	-1.0294	1.27446	-0.229998
NCU07606	0.0543626		-0.0162927	1.27071		0.0543626		-0.0162927	1.27071
NCU07161	0.0543355		-0.0162927	1.27071	0.678579	0.0543355		-0.0162927	1.27071	0.678579
NCU08253	1.2689		-1.85525	-2.08816		1.2689		-1.85525	-2.08816
NCU05699	1.01335	-0.431367	-0.908118	1.24791	-0.413623	1.01335	-0.431367	-0.908118	1.24791	-0.413623
NCU09026	-0.848183	1.24428	-1.94297	-1.09229		-0.848183	1.24428	-1.94297	-1.09229
NCU16719	-0.59173	-0.0846536	-1.40775	1.23862	-0.0851197	-0.59173	-0.0846536	-1.40775	1.23862	-0.0851197
NCU08083	1.22346		-3.10938	-3.34229		1.22346		-3.10938	-3.34229
NCU04900	1.21961		-1.85525	-2.08816		1.21961		-1.85525	-2.08816
NCU08252	1.21556		-2.43982	-4.07879		1.21556		-2.43982	-4.07879
NCU08204	1.20887		-4.18789	-4.4208	0.650145	1.20887		-4.18789	-4.4208	0.650145
NCU05079	1.20862	-1.0256	-1.05249	-0.679529	-0.202902	1.20862	-1.0256	-1.05249	-0.679529	-0.202902
NCU07083	0.803202	-0.879079	1.20271	1.05906	0.67345	0.803202	-0.879079	1.20271	1.05906	0.67345
NCU08077	1.18136		0.461972	-2.49821	0.566561	1.18136		0.461972	-2.49821	0.566561
NCU17138	-0.206291	1.17712	0.394866	0.914898	-0.298425	-0.206291	1.17712	0.394866	0.914898	-0.298425
NCU07214	-1.25156	1.17308	-3.69358	-3.92649	1.00479	-1.25156	1.17308	-3.69358	-3.92649	1.00479
NCU04881	-0.369502	-1.55561	-0.27868	1.17192	0.603195	-0.369502	-1.55561	-0.27868	1.17192	0.603195
NCU17055	-1.20488	-0.469925	-0.209898	1.16819	0.315552	-1.20488	-0.469925	-0.209898	1.16819	0.315552
NCU09525	0.864193	0.393349	1.16708	0.738956	0.81995	0.864193	0.393349	1.16708	0.738956	0.81995
NCU07132	-0.606083	1.16514	0.397405	0.910157	-0.665988	-0.606083	1.16514	0.397405	0.910157	-0.665988
NCU08866	0.0542775		-0.0162927	1.16485		0.0542775		-0.0162927	1.16485
NCU04997	-0.521213	0.266713	1.16165	0.0860158	-0.083595	-0.521213	0.266713	1.16165	0.0860158	-0.083595
NCU05055	-2.57425		-4.14942	-4.38233	1.15333	-2.57425		-4.14942	-4.38233	1.15333
NCU09494	-0.156315	0.0971905	-0.295671	1.14381	0.0161142	-0.156315	0.0971905	-0.295671	1.14381	0.0161142
NCU10210	1.14016		-2.98447	-3.21737		1.14016		-2.98447	-3.21737
NCU08219	-2.42104		-3.91147	-2.72978	1.13976	-2.42104		-3.91147	-2.72978	1.13976
NCU08075	-1.02132	0.0866212	-2.18841	-3.83146	1.13697	-1.02132	0.0866212	-2.18841	-3.83146	1.13697
NCU16305	-0.365334		1.13606	-2.08818		-0.365334		1.13606	-2.08818
NCU07637	1.12325	0.163605	-3.49685	-5.2283	0.319792	1.12325	0.163605	-3.49685	-5.2283	0.319792
NCU05163	1.12044	-0.0282419	0.605239	0.21806	0.416609	1.12044	-0.0282419	0.605239	0.21806	0.416609
NCU04889	0.708629	-2.13595	-3.64414	-3.87705	1.1109	0.708629	-2.13595	-3.64414	-3.87705	1.1109
NCU04695	0.284559	0.490697	1.10992	0.191777	-0.177411	0.284559	0.490697	1.10992	0.191777	-0.177411
NCU07110	0.293007	-0.365756	0.208077	1.10614	0.542362	0.293007	-0.365756	0.208077	1.10614	0.542362
NCU04992	-3.59151	-1.51265	-2.18087	1.10596	-0.601488	-3.59151	-1.51265	-2.18087	1.10596	-0.601488
NCU07208	-0.686568	1.10219	-2.17647	-2.40938		-0.686568	1.10219	-2.17647	-2.40938
NCU07592	-0.676286	1.10219	-3.25847	-1.04623		-0.676286	1.10219	-3.25847	-1.04623
NCU09834	0.81589	1.10219	-1.62489	-1.8578		0.81589	1.10219	-1.62489	-1.8578
NCU11409	-0.102379	0.965644	0.195579	1.0981	-0.953686	-0.102379	0.965644	0.195579	1.0981	-0.953686
NCU11342	-1.67145	1.09131	-3.04211	1.04708	-0.0772388	-1.67145	1.09131	-3.04211	1.04708	-0.0772388
NCU08795	0.711424	0.248193	0.358956	1.09061	0.483567	0.711424	0.248193	0.358956	1.09061	0.483567
NCU08236	-3.35185		-4.92197	-5.15488	1.04534	-3.35185		-4.92197	-5.15488	1.04534
NCU04915	-1.85636	1.03778	-1.92697	-2.15987		-1.85636	1.03778	-1.92697	-2.15987
NCU08769	1.03304	-0.951271	-1.61063	-1.89176	0.287846	1.03304	-0.951271	-1.61063	-1.89176	0.287846
NCU07139	1.02728	0.244445	0.285985	0.157201	0.317159	1.02728	0.244445	0.285985	0.157201	0.317159
NCU07115	0.564453	-1.44693	0.637475	1.02408	-0.556587	0.564453	-1.44693	0.637475	1.02408	-0.556587
NCU05906	-0.319394	0.865548	-0.0722785	1.01787	-0.734991	-0.319394	0.865548	-0.0722785	1.01787	-0.734991
NCU07206	-0.271392	0.130479	-0.420121	0.954203	-0.106643	-0.271392	0.130479	-0.420121	0.954203	-0.106643
NCU09726	-0.0113298	0.941438	-3.8626	-4.09551		-0.0113298	0.941438	-3.8626	-4.09551
NCU08785	-0.093383	0.874276	-3.16713	-1.35353	0.934831	-0.093383	0.874276	-3.16713	-1.35353	0.934831
NCU08534	-3.70068	0.163605	-3.77132	-4.00423	0.921063	-3.70068	0.163605	-3.77132	-4.00423	0.921063
NCU16718	-3.3662	-2.13595	-2.02882	-3.66972	0.912852	-3.3662	-2.13595	-2.02882	-3.66972	0.912852
NCU08262	0.91047		-2.52772	-2.76063		0.91047		-2.52772	-2.76063
NCU16905	-2.39999	0.598385	-3.03878	0.907513	-0.981536	-2.39999	0.598385	-3.03878	0.907513	-0.981536
NCU11341	-0.6828	-0.193817	-0.162329	0.896392	-0.793774	-0.6828	-0.193817	-0.162329	0.896392	-0.793774
NCU04911	0.890859	-1.93163	-0.131674	-2.35564	0.608759	0.890859	-1.93163	-0.131674	-2.35564	0.608759
NCU09652	-0.198978	0.874668	-0.0571101	0.624324	-0.0710829	-0.198978	0.874668	-0.0571101	0.624324	-0.0710829
NCU08768	0.154995	0.599694	0.527513	0.870055	-0.442996	0.154995	0.599694	0.527513	0.870055	-0.442996
NCU10501	-2.58401	0.0866212	-1.23931	0.862893	-0.0259291	-2.58401	0.0866212	-1.23931	0.862893	-0.0259291
NCU16701	-0.00449812	-2.27819	0.846852	0.292688	-0.530482	-0.00449812	-2.27819	0.846852	0.292688	-0.530482
NCU09163	0.0850774	0.799912	0.0420022	0.839197	-0.328512	0.0850774	0.799912	0.0420022	0.839197	-0.328512
NCU05886	-3.35305	0.828398	-1.8511	0.161966	0.279927	-3.35305	0.828398	-1.8511	0.161966	0.279927
NCU04886	0.794007	0.145665	0.516252	0.828055	-0.589055	0.794007	0.145665	0.516252	0.828055	-0.589055
NCU08263	-1.78466		-1.85528	-2.08819	0.821454	-1.78466		-1.85528	-2.08819	0.821454
NCU05094	-1.25808	-0.772781	-1.9554	0.700863	0.815366	-1.25808	-0.772781	-1.9554	0.700863	0.815366
NCU07088	0.81071	-0.0969943	0.0566754	0.495614	0.749119	0.81071	-0.0969943	0.0566754	0.495614	0.749119
NCU07630	0.810209		-3.45737	-3.69028		0.810209		-3.45737	-3.69028
NCU04910	-0.323569	-0.546848	0.257118	0.773697	0.359095	-0.323569	-0.546848	0.257118	0.773697	0.359095
NCU08258	-0.97914		-2.64463	-2.86993	0.767138	-0.97914		-2.64463	-2.86993	0.767138
NCU07644	0.759894		-1.27409	0.212214	0.690646	0.759894		-1.27409	0.212214	0.690646
NCU05179	-2.25677	0.758328	-3.36023	-5.00413	0.333176	-2.25677	0.758328	-3.36023	-5.00413	0.333176
NCU05887	-0.459297	0.589187	-0.783379	0.752236	-1.23441	-0.459297	0.589187	-0.783379	0.752236	-1.23441
NCU08049	0.360607	0.320028	0.731375	0.357135	-0.142257	0.360607	0.320028	0.731375	0.357135	-0.142257
NCU07136	-1.74815	-1.88372	-1.58959	0.598314	0.728621	-1.74815	-1.88372	-1.58959	0.598314	0.728621
NCU08755	0.33618	0.47727	0.265404	0.723215	0.446724	0.33618	0.47727	0.265404	0.723215	0.446724
NCU08572	0.525292		0.682948	-0.555044		0.525292		0.682948	-0.555044
NCU07109	-0.986754		0.292109	0.289191	0.663879	-0.986754		0.292109	0.289191	0.663879
NCU08240	-0.679964		0.654047	-0.983482		-0.679964		0.654047	-0.983482
NCU05093	-0.484736	0.0666031	-3.54524	0.648712	0.340605	-0.484736	0.0666031	-3.54524	0.648712	0.340605
NCU08243	0.644277		-2.52773	-1.34661		0.644277		-2.52773	-1.34661
NCU09579	-0.390641	-0.469263	0.516905	0.642142	0.0699147	-0.390641	-0.469263	0.516905	0.642142	0.0699147
NCU07102	0.633496	-0.792963	-0.977305	0.382534	-0.113699	0.633496	-0.792963	-0.977305	0.382534	-0.113699
NCU04908	-0.930191	-0.459659	0.217143	0.614102	0.474828	-0.930191	-0.459659	0.217143	0.614102	0.474828
NCU07628	-3.53925		-3.60991	-3.84282	0.591028	-3.53925		-3.60991	-3.84282	0.591028
NCU07084	0.58541		-0.450652	-2.08817		0.58541		-0.450652	-2.08817
NCU07636	0.585344		-1.85526	-2.08817		0.585344		-1.85526	-2.08817
NCU05092	-3.06329	-2.44536	-3.13389	-3.3668	0.577916	-3.06329	-2.44536	-3.13389	-3.3668	0.577916
NCU08251	-2.44269		-2.39165	-4.16603	0.575298	-2.44269		-2.39165	-4.16603	0.575298
NCU17044	-0.396219	-2.13366	-3.1426	-2.55848	0.572054	-0.396219	-2.13366	-3.1426	-2.55848	0.572054
NCU05921	0.235934	0.098478	0.119551	0.558662	-0.86718	0.235934	0.098478	0.119551	0.558662	-0.86718
NCU08883	-0.679962		-0.750574	0.536425		-0.679962		-0.750574	0.536425
NCU05000	-1.72404	0.0441128	-0.142141	0.536131	-0.229064	-1.72404	0.0441128	-0.142141	0.536131	-0.229064
NCU09901	0.153674	0.246324	-0.298488	-0.906948	0.517909	0.153674	0.246324	-0.298488	-0.906948	0.517909
NCU05074	0.198306	-0.822437	-0.313682	0.500355	-0.669492	0.198306	-0.822437	-0.313682	0.500355	-0.669492
NCU12144	-3.62146		-3.6921	-3.925	0.491318	-3.62146		-3.6921	-3.925	0.491318
NCU04901	-1.14397		0.280394	0.487039		-1.14397		0.280394	0.487039
NCU05160	-0.891558	0.442794	-0.99779	0.468218	0.123415	-0.891558	0.442794	-0.99779	0.468218	0.123415
NCU08573	-0.679963		-0.750574	0.430568		-0.679963		-0.750574	0.430568
NCU10629	-0.679964		-0.750574	0.430564		-0.679964		-0.750574	0.430564
NCU08233	-0.265674	-1.86186	-0.154786	0.426618	-0.132772	-0.265674	-1.86186	-0.154786	0.426618	-0.132772
NCU17054	-1.79012	-2.44536	-0.357762	0.423826		-1.79012	-2.44536	-0.357762	0.423826
NCU16904	-0.380424	-0.418668	-1.61111	0.407968	0.0128691	-0.380424	-0.418668	-1.61111	0.407968	0.0128691
NCU08635	-1.45866	-0.526917	-3.11542	-0.768932	0.396003	-1.45866	-0.526917	-3.11542	-0.768932	0.396003
NCU09582	-0.593358	-1.40997	-0.974821	-0.896138	0.395019	-0.593358	-1.40997	-0.974821	-0.896138	0.395019
NCU07518	-0.743254	-5.21469	0.390112	-0.0685643	-0.645267	-0.743254	-5.21469	0.390112	-0.0685643	-0.645267
NCU08224	-0.0479689	-0.584136	0.377487	0.332507	-0.934402	-0.0479689	-0.584136	0.377487	0.332507	-0.934402
NCU07146	-1.62752		-3.99646	-5.73889	0.376628	-1.62752		-3.99646	-5.73889	0.376628
NCU07162	-0.762863	-0.918559	-1.17428	0.373076	-0.502728	-0.762863	-0.918559	-1.17428	0.373076	-0.502728
NCU08829	-0.0832141	0.350468	-1.71347	-3.43506		-0.0832141	0.350468	-1.71347	-3.43506
NCU07599	0.326892		-1.15297	-2.93045		0.326892		-1.15297	-2.93045
NCU05189	-1.08883	-0.0752726	-0.386212	-0.247362	0.301066	-1.08883	-0.0752726	-0.386212	-0.247362	0.301066
NCU07632	-0.163112		-4.47436	-4.70727	0.296694	-0.163112		-4.47436	-4.70727	0.296694
NCU08905	0.0489623	-1.18177	-0.0621874	0.295229	-0.962344	0.0489623	-1.18177	-0.0621874	0.295229	-0.962344
NCU04890	-4.40375		-4.4744	-4.70731	0.292137	-4.40375		-4.4744	-4.70731	0.292137
NCU17161	-1.12323		0.210798	-1.42673		-1.12323		0.210798	-1.42673
NCU08220	0.202945		-1.28718	-1.52009		0.202945		-1.28718	-1.52009
NCU08257	0.170128		-2.34462	-2.57753		0.170128		-2.34462	-2.57753
NCU07634	-0.0428871	0.163605	-3.16305	-3.39596		-0.0428871	0.163605	-3.16305	-3.39596
NCU16705	-0.89906	0.163605	-2.38896	-2.62187		-0.89906	0.163605	-2.38896	-2.62187
NCU17170	-1.96541	0.163605	-2.05073	-3.68826		-1.96541	0.163605	-2.05073	-3.68826
NCU05866	-0.999697	0.159152	-1.69872	-0.199082	0.0881892	-0.999697	0.159152	-1.69872	-0.199082	0.0881892
NCU07114	-1.11332	-1.06649	-1.11797	0.150931	-0.387448	-1.11332	-1.06649	-1.11797	0.150931	-0.387448
NCU16728	-0.846543		-2.33648	-0.216369	0.141409	-0.846543		-2.33648	-0.216369	0.141409
NCU05907	-2.6361	-0.245039	-1.75776	0.0222513	0.130686	-2.6361	-0.245039	-1.75776	0.0222513	0.130686
NCU07627	0.126468	-2.13595	-2.45131	-0.239436		0.126468	-2.13595	-2.45131	-0.239436
NCU05157	-1.8471	-0.968226	-1.13839	0.12493	0.0294398	-1.8471	-0.968226	-1.13839	0.12493	0.0294398
NCU05048	-0.692509	0.0666031	-3.13424	-3.36715		-0.692509	0.0666031	-3.13424	-3.36715
NCU07245	0.0657386	-1.22049	-1.32453	-1.95862	-0.400006	0.0657386	-1.22049	-1.32453	-1.95862	-0.400006
NCU16928	-1.41523	-0.217847	0.0608256	-1.71877		-1.41523	-0.217847	0.0608256	-1.71877
NCU07219	0.0542779		-0.0162927	-0.2492		0.0542779		-0.0162927	-0.2492
NCU08765	0.0542779		-0.0162927	-0.2492		0.0542779		-0.0162927	-0.2492
NCU10055	-0.834706	0.00395297	-0.489438	0.000747837	0.046842	-0.834706	0.00395297	-0.489438	0.000747837	0.046842
NCU05914	-0.761304	-0.936092	-0.33559	0.0419631	0.0233567	-0.761304	-0.936092	-0.33559	0.0419631	0.0233567
NCU08210	-1.46623		0.00983217	-1.76976		-1.46623		0.00983217	-1.76976
NCU09277	-0.630866	-0.882213	-0.379956	-0.148416	0.00857583	-0.630866	-0.882213	-0.379956	-0.148416	0.00857583
NCU08080	0		0	0		0		0	0
NCU09166	-0.0586275		-0.0180003	-0.27398		-0.0586275		-0.0180003	-0.27398
NCU09177	-0.0200086		-1.12816	-2.76766		-0.0200086		-1.12816	-2.76766
NCU09914	-0.478805	-0.0461362	-1.59635	-0.0370807	-0.0894071	-0.478805	-0.0461362	-1.59635	-0.0370807	-0.0894071
NCU08113	-0.683889	-0.466481	-0.0679881	-0.0897346	-1.05207	-0.683889	-0.466481	-0.0679881	-0.0897346	-1.05207
NCU05156	-0.118004	-0.219654	-1.26712	-0.42773	-0.429472	-0.118004	-0.219654	-1.26712	-0.42773	-0.429472
NCU16704	-0.134679		-1.62461	-1.85752		-0.134679		-1.62461	-1.85752
NCU16936	-0.182072	-1.31822	-3.05871	-0.713843	-0.149318	-0.182072	-1.31822	-3.05871	-0.713843	-0.149318
NCU07600	-3.76969	-0.217847	-3.84038	-4.07329		-3.76969	-0.217847	-3.84038	-4.07329
NCU05656	-0.262029		-2.8477	-3.08061		-0.262029		-2.8477	-3.08061
NCU08244	-0.307164		-3.43121	-3.66412		-0.307164		-3.43121	-3.66412
NCU09190	-1.46626		-1.53685	-0.355715		-1.46626		-1.53685	-0.355715
NCU05085	-0.365355		-1.85527	-2.08818		-0.365355		-1.85527	-2.08818
NCU09158	-0.424249		-0.49483	-0.727737		-0.424249		-0.49483	-0.727737
NCU16707	-0.437036		-1.92695	-2.15986		-0.437036		-1.92695	-2.15986
NCU04892	-1.78468		-0.450661	-2.08819		-1.78468		-0.450661	-2.08819
NCU16743	-1.78468		-0.450661	-2.08819		-1.78468		-0.450661	-2.08819
NCU16740	-0.462191		-3.63352	-3.86643		-0.462191		-3.63352	-3.86643
NCU05713	-0.469181		-1.9591	-0.777964		-0.469181		-1.9591	-0.777964
NCU08234	-0.540636		-2.11587	-2.34878		-0.540636		-2.11587	-2.34878
NCU08542	-0.601307		-0.629757	-2.40937		-0.601307		-0.629757	-2.40937
NCU08211	-2.22102	-2.44536	-0.645016	-3.9472		-2.22102	-2.44536	-0.645016	-3.9472
NCU08241	-1.99342		-0.657247	-2.29695		-1.99342		-0.657247	-2.29695
NCU05666	-0.680017		-0.750574	-0.983482		-0.680017		-0.750574	-0.983482
NCU07635	-0.680017		-0.750574	-0.983482		-0.680017		-0.750574	-0.983482
NCU08575	-0.680017		-0.750574	-0.983482		-0.680017		-0.750574	-0.983482
NCU09584	-0.680017		-0.750574	-0.983482		-0.680017		-0.750574	-0.983482
NCU09587	-0.680017		-0.750574	-0.983482		-0.680017		-0.750574	-0.983482
NCU10936	-0.680017		-0.750574	-0.983482		-0.680017		-0.750574	-0.983482
NCU12044	-0.680017		-0.750574	-0.983482		-0.680017		-0.750574	-0.983482
NCU08235	-2.27967	-0.727416	-2.41096	-2.63664		-2.27967	-0.727416	-2.41096	-2.63664
NCU08206	-0.78554		-0.856143	-1.08905		-0.78554		-0.856143	-1.08905
NCU07629	-0.785584		-0.856143	-1.08905		-0.785584		-0.856143	-1.08905
NCU17180	-2.26585		-0.789804	-2.5694		-2.26585		-0.789804	-2.5694
NCU08246	-2.26587		-0.789804	-2.5694		-2.26587		-0.789804	-2.5694
NCU09164	-0.907108	-2.13595	-0.97767	-1.21058		-0.907108	-2.13595	-0.97767	-1.21058
NCU05661	-2.26585		-0.931868	-2.5694		-2.26585		-0.931868	-2.5694
NCU05111	-2.31844		-0.984446	-1.10235		-2.31844		-0.984446	-1.10235
NCU12065	-1.03542	-1.16002	-2.16114	-1.37587		-1.03542	-1.16002	-2.16114	-1.37587
NCU05082	-1.12142		-2.69659	-2.9295		-1.12142		-2.69659	-2.9295
NCU16706	-1.1232		-1.19382	-1.42673		-1.1232		-1.19382	-1.42673
NCU07243	-1.12321		-1.19382	-1.42673		-1.12321		-1.19382	-1.42673
NCU09150	-1.12326		-1.19382	-1.42673		-1.12326		-1.19382	-1.42673
NCU17143	-1.12326		-1.19382	-1.42673		-1.12326		-1.19382	-1.42673
NCU07244	-2.62596		-1.14992	-2.92951		-2.62596		-1.14992	-2.92951
NCU05171	-2.50344		-1.16944	-2.80697		-2.50344		-1.16944	-2.80697
NCU08248	-1.2163		-1.2869	-1.51981		-1.2163		-1.2869	-1.51981
NCU08209	-1.21633		-1.2869	-1.51981		-1.21633		-1.2869	-1.51981
NCU08208	-2.62596		-1.29198	-2.92951		-2.62596		-1.29198	-2.92951
NCU05769	-1.46626		-1.53685	-1.76976		-1.46626		-1.53685	-1.76976
NCU08255	-1.46628		-1.53685	-1.76976		-1.46628		-1.53685	-1.76976
NCU12036	-1.46628		-1.53685	-1.76976		-1.46628		-1.53685	-1.76976
NCU16723	-1.46628		-1.53685	-1.76976		-1.46628		-1.53685	-1.76976
NCU17181	-1.46628		-1.53685	-1.76976		-1.46628		-1.53685	-1.76976
NCU10005	-1.49452		-2.98449	-3.2174		-1.49452		-2.98449	-3.2174
NCU09725	-1.55403		-1.62463	-1.85753		-1.55403		-1.62463	-1.85753
NCU05657	-1.55404		-1.62462	-1.85753		-1.55404		-1.62462	-1.85753
NCU16702	-3.0388		-1.7048	-3.34233		-3.0388		-1.7048	-3.34233
NCU04937	-1.78471		-1.85528	-2.08819		-1.78471		-1.85528	-2.08819
NCU08059	-1.78471		-1.85528	-2.08819		-1.78471		-1.85528	-2.08819
NCU08213	-1.78471		-1.85528	-2.08819		-1.78471		-1.85528	-2.08819
NCU12039	-1.78471		-1.85528	-2.08819		-1.78471		-1.85528	-2.08819
NCU08264	-1.84088		-3.33083	-3.56374		-1.84088		-3.33083	-3.56374
NCU08245	-3.31834	-2.13595	-1.85917	-3.62189		-3.31834	-2.13595	-1.85917	-3.62189
NCU10766	-3.35936		-1.88331	-3.6629		-3.35936		-1.88331	-3.6629
NCU11087	-1.97146		-2.04207	-2.27498		-1.97146		-2.04207	-2.27498
NCU09665	-3.26016		-3.33085	-2.04385		-3.26016		-3.33085	-2.04385
NCU08781	-2.04526		-2.11589	-2.34879		-2.04526		-2.11589	-2.34879
NCU08212	-2.04528		-2.11589	-2.34879		-2.04528		-2.11589	-2.34879
NCU05660	-2.0453		-2.11589	-2.34879		-2.0453		-2.11589	-2.34879
NCU07213	-2.10587		-2.17648	-2.40939		-2.10587		-2.17648	-2.40939
NCU08265	-3.4097	-2.13595	-3.48031	-3.71322		-3.4097	-2.13595	-3.48031	-3.71322
NCU04891	-2.21864		-2.38573	-4.02393		-2.21864		-2.38573	-4.02393
NCU08237	-2.26588		-2.33649	-2.5694		-2.26588		-2.33649	-2.5694
NCU08238	-2.28041		-3.77074	-4.00364		-2.28041		-3.77074	-4.00364
NCU08207	-2.45712		-2.52776	-2.76067		-2.45712		-2.52776	-2.76067
NCU08574	-2.45717		-2.52776	-2.76067		-2.45717		-2.52776	-2.76067
NCU05099	-2.62676		-2.69744	-2.93035		-2.62676		-2.69744	-2.93035
NCU07603	-3.44756		-3.51817	-3.75108		-3.44756		-3.51817	-3.75108
NCU09908	-3.62146		-3.6921	-3.925		-3.62146		-3.6921	-3.925
NCU06904	-3.77303		-3.84364	-4.07655		-3.77303		-3.84364	-4.07655
NCU10572	0.570496	2.05266	-2.93953	0.316329	2.44958	0.570496	2.05266	-2.93953	0.316329	2.44958
NCU02196	-1.98241	-0.900769	-2.9569	-1.15298	2.32323	-1.98241	-0.900769	-2.9569	-1.15298	2.32323
NCU09957	-1.28891	-0.90179	-4.41484	-0.546144	2.06768	-1.28891	-0.90179	-4.41484	-0.546144	2.06768
NCU07222	-1.24227	-0.414178	-2.97163	0.00391494	1.85386	-1.24227	-0.414178	-2.97163	0.00391494	1.85386
NCU08232	-1.66949	-0.311199	-2.13424	0.356433	1.63845	-1.66949	-0.311199	-2.13424	0.356433	1.63845
NCU09185	-1.01948	-1.51478	-0.914085	2.00769	-0.965507	-1.01948	-1.51478	-0.914085	2.00769	-0.965507
NCU04887	-0.80171	-1.66725	-1.2674	-0.648766	1.97432	-0.80171	-1.66725	-1.2674	-0.648766	1.97432
NCU10129	-1.8773	-1.6362	-0.598344	-0.194099	1.22341	-1.8773	-1.6362	-0.598344	-0.194099	1.22341
NCU08541	-1.74638	-1.35693	-1.69532	0.59763	1.16059	-1.74638	-1.35693	-1.69532	0.59763	1.16059
NCU08095	-2.88592	4.23175	-1.30414	0.254541	0.152112	-2.88592	4.23175	-1.30414	0.254541	0.152112
NCU05899	-2.18512	1.16746	-2.26963	-0.111319	2.84397	-2.18512	1.16746	-2.26963	-0.111319	2.84397
NCU11291	-3.71047	1.18382	-3.41249	0.711569	1.26642	-3.71047	1.18382	-3.41249	0.711569	1.26642
NCU04865	2.25449	-3.13532	1.18839	-1.89055	-1.38867	2.25449	-3.13532	1.18839	-1.89055	-1.38867
NCU07651	-0.611711	-0.217847	-0.682345	4.11541	-1.58793	-0.611711	-0.217847	-0.682345	4.11541	-1.58793
NCU16741	0.657073	2.87659	-1.44024	0.201832	-1.58342	0.657073	2.87659	-1.44024	0.201832	-1.58342
NCU05058	2.18323	-2.71065	2.12794	1.39424	-2.30779	2.18323	-2.71065	2.12794	1.39424	-2.30779
NCU16307	0.568176	-2.71065	-1.94598	2.01074	-1.54461	0.568176	-2.71065	-1.94598	2.01074	-1.54461
NCU04883	1.99328	-3.65354	0.668733	1.48772	-1.05188	1.99328	-3.65354	0.668733	1.48772	-1.05188
NCU04903	1.92366	-0.468511	1.36829	0.238165	-1.94007	1.92366	-0.468511	1.36829	0.238165	-1.94007
NCU05888	0.25085	0.929269	-0.848492	1.92349	-1.33453	0.25085	0.929269	-0.848492	1.92349	-1.33453
NCU09954	1.87442	-1.4051	1.46429	1.12187	-1.89526	1.87442	-1.4051	1.46429	1.12187	-1.89526
NCU09838	1.81722	0.835697	0.975932	0.928567	-1.27002	1.81722	0.835697	0.975932	0.928567	-1.27002
NCU09168	-0.314768	-1.17177	1.80727	-0.228012	-3.25433	-0.314768	-1.17177	1.80727	-0.228012	-3.25433
NCU08226	1.76675	-0.744879	0.932224	-1.98069	-1.69685	1.76675	-0.744879	0.932224	-1.98069	-1.69685
NCU07510	1.75596	-0.245039	0.168423	1.29015	-1.39535	1.75596	-0.245039	0.168423	1.29015	-1.39535
NCU10027	-0.734631	-0.640949	-1.34915	1.74575	-1.5367	-0.734631	-0.640949	-1.34915	1.74575	-1.5367
NCU09186	-0.979524	-1.13711	-0.125481	1.70566	-1.46062	-0.979524	-1.13711	-0.125481	1.70566	-1.46062
NCU10030	-1.62584	0.608178	-0.735418	1.68904	-1.47078	-1.62584	0.608178	-0.735418	1.68904	-1.47078
NCU09909	1.63976	-0.229583	1.2401	1.0811	-1.27045	1.63976	-0.229583	1.2401	1.0811	-1.27045
NCU09167	-0.924193	-0.645568	1.60247	0.0323564	-2.77801	-0.924193	-0.645568	1.60247	0.0323564	-2.77801
NCU07620	1.58937	-1.75939	0.856805	0.755387	-1.09948	1.58937	-1.75939	0.856805	0.755387	-1.09948
NCU07210	-0.0964325	0.112676	-0.331081	1.54958	-1.15396	-0.0964325	0.112676	-0.331081	1.54958	-1.15396
NCU08524	1.52476	-1.22495	0.832544	1.47384	-1.66285	1.52476	-1.22495	0.832544	1.47384	-1.66285
NCU07076	0.312239	0.398011	-0.351456	1.49255	-1.27968	0.312239	0.398011	-0.351456	1.49255	-1.27968
NCU07626	0.0741334	-2.05924	-0.154252	1.4719	-1.03968	0.0741334	-2.05924	-0.154252	1.4719	-1.03968
NCU16729	1.30004	0.556496	-0.671373	0.851446	-1.21544	1.30004	0.556496	-0.671373	0.851446	-1.21544
NCU05919	0.586477	0.516564	0.988057	1.21906	-1.29986	0.586477	0.516564	0.988057	1.21906	-1.29986
NCU09486	-1.83482	0.611344	0.547693	1.19603	-1.70907	-1.83482	0.611344	0.547693	1.19603	-1.70907
NCU07802	1.16512	-0.679247	0.710526	-0.818394	-1.69378	1.16512	-0.679247	0.710526	-0.818394	-1.69378
NCU10538	0.992651	0.308368	0.903293	0.472978	-1.77247	0.992651	0.308368	0.903293	0.472978	-1.77247
NCU05057	0.849037	-1.02896	0.912569	0.63352	-1.29629	0.849037	-1.02896	0.912569	0.63352	-1.29629
NCU07610	0.848496	-1.266	-1.30909	-0.525388	-1.45336	0.848496	-1.266	-1.30909	-0.525388	-1.45336
NCU09664	-1.35557	-1.04555	-1.31367	0.750184	-1.10662	-1.35557	-1.04555	-1.31367	0.750184	-1.10662
NCU05920	0.547858	0.0604852	0.0565722	0.635524	-1.03042	0.547858	0.0604852	0.0565722	0.635524	-1.03042
NCU09179	-0.384018	-4.03696	-2.89855	0.618043	-1.49434	-0.384018	-4.03696	-2.89855	0.618043	-1.49434
NCU05061	-0.399106	-0.848867	0.079972	0.603119	-1.25457	-0.399106	-0.848867	0.079972	0.603119	-1.25457
NCU09627	0.290818	0.294668	0.545596	-0.0378163	-2.09209	0.290818	0.294668	0.545596	-0.0378163	-2.09209
NCU05089	0.485453	-0.387071	-0.0770501	-0.532551	-1.53419	0.485453	-0.387071	-0.0770501	-0.532551	-1.53419
NCU07241	-1.83454	0.226346	0.0102844	0.281613	-1.99531	-1.83454	0.226346	0.0102844	0.281613	-1.99531
NCU09520	-0.865923	-0.137895	-0.80106	-1.09936	-2.29716	-0.865923	-0.137895	-0.80106	-1.09936	-2.29716
NCU09629	-1.58174	-0.635569	-0.400599	-0.18262	-1.12546	-1.58174	-0.635569	-0.400599	-0.18262	-1.12546
NCU09641	0.312347	3.37367	-2.14618	0.650123	-0.931452	0.312347	3.37367	-2.14618	0.650123	-0.931452
NCU09651	-1.12277	0.883416	-2.43349	1.80929	0.114649	-1.12277	0.883416	-2.43349	1.80929	0.114649
NCU05078	-1.38821	0.335477	-2.20283	0.879062	-0.174405	-1.38821	0.335477	-2.20283	0.879062	-0.174405
NCU08544	-1.58284	-2.23268	-3.26005	-2.03399	0.704851	-1.58284	-2.23268	-3.26005	-2.03399	0.704851
NCU08558	-0.491218	-4.44597	-4.84481	-0.835205	0.00152791	-0.491218	-4.44597	-4.84481	-0.835205	0.00152791
NCU08640	-2.56278	-2.5329	-5.10148	-0.305135	-0.524845	-2.56278	-2.5329	-5.10148	-0.305135	-0.524845
NCU09274	1.98414	-1.11135	0.898001	-0.473015	-0.90009	1.98414	-1.11135	0.898001	-0.473015	-0.90009
NCU08537	-1.91977	-2.18208	-1.06103	0.375116	0.869693	-1.91977	-2.18208	-1.06103	0.375116	0.869693
NCU04874	0.727181	-1.83145	-1.33682	0.0613317	0.850598	0.727181	-1.83145	-1.33682	0.0613317	0.850598
NCU04862	0.621762	-3.85113	-0.13076	-0.30957	-0.884614	0.621762	-3.85113	-0.13076	-0.30957	-0.884614
NCU07618	-0.144228	-1.65696	0.355443	0.538668	-0.647414	-0.144228	-1.65696	0.355443	0.538668	-0.647414
NCU16742	-1.26055	-2.14303	-0.410489	0.464134	0.411772	-1.26055	-2.14303	-0.410489	0.464134	0.411772
NCU08549	-1.70615	-1.56421	0.309755	0.283432	0.243554	-1.70615	-1.56421	0.309755	0.283432	0.243554
NCU11129	-0.432037	-1.24648	-0.191378	0.181006	-0.0545706	-0.432037	-1.24648	-0.191378	0.181006	-0.0545706
NCU09958	-1.36397	-1.56048	-2.41238	1.01676	1.25937	-1.36397	-1.56048	-2.41238	1.01676	1.25937
NCU07138	-2.11021	2.00383	-3.2502	-1.47114	0.909762	-2.11021	2.00383	-3.2502	-1.47114	0.909762
NCU10070	-3.24895	1.4514	-1.11111	3.40897	-2.00276	-3.24895	1.4514	-1.11111	3.40897	-2.00276
NCU09631	-3.06632	0.978314	-0.367465	1.84654	-0.577417	-3.06632	0.978314	-0.367465	1.84654	-0.577417
NCU09630	-3.58621	-1.78784	-0.959196	1.28703	-0.0321993	-3.58621	-1.78784	-0.959196	1.28703	-0.0321993
NCU08538	-2.09152	-2.32818	-1.98984	0.426047	1.01098	-2.09152	-2.32818	-1.98984	0.426047	1.01098
NCU05069	-2.62414	0.395002	-1.99947	0.456462	0.816346	-2.62414	0.395002	-1.99947	0.456462	0.816346
NCU09959	-2.07795	-2.03613	-1.83356	0.642507	0.508454	-2.07795	-2.03613	-1.83356	0.642507	0.508454
NCU09526	-2.92501	-0.406878	-1.09768	0.461872	-0.0650933	-2.92501	-0.406878	-1.09768	0.461872	-0.0650933
NCU05897	-6.90414	-0.204305	-5.35424	0.244043	5.40078	-6.90414	-0.204305	-5.35424	0.244043	5.40078
NCU09170	-6.82172	-1.00924	-6.23254	0.119697	4.57613	-6.82172	-1.00924	-6.23254	0.119697	4.57613
NCU04914	-4.12754	-1.56274	-4.22217	0.744855	3.60917	-4.12754	-1.56274	-4.22217	0.744855	3.60917
NCU07232	-10.172	0.419287	-8.93519	-1.12089	2.9003	-10.172	0.419287	-8.93519	-1.12089	2.9003
NCU11088	-2.08184	0.549805	-2.13608	1.61607	2.54913	-2.08184	0.549805	-2.13608	1.61607	2.54913
NCU05670	-4.27643	-2.03643	-7.1323	-0.949736	2.25429	-4.27643	-2.03643	-7.1323	-0.949736	2.25429
NCU05669	-6.0348	-2.42281	-3.78981	-0.81362	2.23169	-6.0348	-2.42281	-3.78981	-0.81362	2.23169
NCU08784	-3.88041	-0.998471	-3.91895	-0.514951	1.56414	-3.88041	-0.998471	-3.91895	-0.514951	1.56414
NCU04923	1.27278	-1.40182	1.57673	-1.30711	-1.58273	1.27278	-1.40182	1.57673	-1.30711	-1.58273
NCU05049	1.15949	-2.32244	1.53207	-0.572078	-2.29675	1.15949	-2.32244	1.53207	-0.572078	-2.29675
NCU09188	-0.9069	-1.9384	-0.740903	1.30367	-2.15631	-0.9069	-1.9384	-0.740903	1.30367	-2.15631
NCU05663	0.31941	-1.53823	0.797267	0.0893514	-1.4683	0.31941	-1.53823	0.797267	0.0893514	-1.4683
NCU09524	-1.29542	-1.62446	-1.72941	-0.177937	-1.01447	-1.29542	-1.62446	-1.72941	-0.177937	-1.01447
NCU05131	-1.15036	-2.43797	-0.446979	-1.95948	-3.23124	-1.15036	-2.43797	-0.446979	-1.95948	-3.23124
NCU08545	-0.448095	-3.40652	-2.08467	-0.837244	0.824731	-0.448095	-3.40652	-2.08467	-0.837244	0.824731
NCU04871	-1.86069	-4.40659	-2.75967	0.233345	0.553579	-1.86069	-4.40659	-2.75967	0.233345	0.553579
NCU04912	-1.54465	-2.24605	-2.44608	-0.200035	-0.179816	-1.54465	-2.24605	-2.44608	-0.200035	-0.179816
NCU08638	-2.24931	1.22999	-0.866568	0.94576	-1.44734	-2.24931	1.22999	-0.866568	0.94576	-1.44734
NCU09964	-4.25816	2.26795	-8.29484	-3.18139	0.750848	-4.25816	2.26795	-8.29484	-3.18139	0.750848
NCU04998	-2.75713	-0.739629	-3.29	1.7185	0.780892	-2.75713	-0.739629	-3.29	1.7185	0.780892
NCU10031	-3.00554	0.512301	-3.39846	1.68627	-0.0893637	-3.00554	0.512301	-3.39846	1.68627	-0.0893637
NCU04928	-3.15697	1.19793	-2.95096	-0.423076	-0.775239	-3.15697	1.19793	-2.95096	-0.423076	-0.775239
NCU09181	-3.71958	0.721382	-6.10114	-0.183003	0.608172	-3.71958	0.721382	-6.10114	-0.183003	0.608172
NCU04722	-2.79517	0.621012	-3.46178	-0.508252	-0.620009	-2.79517	0.621012	-3.46178	-0.508252	-0.620009
NCU07237	-5.12167	-1.49106	-2.8766	-0.211962	0.583006	-5.12167	-1.49106	-2.8766	-0.211962	0.583006
NCU07234	-3.75604	-0.0174228	-2.61419	0.327437	0.438132	-3.75604	-0.0174228	-2.61419	0.327437	0.438132
NCU05084	-2.30745	-0.785125	-2.66196	0.298248	0.425057	-2.30745	-0.785125	-2.66196	0.298248	0.425057
NCU07124	-2.94961	-2.66811	-5.4469	-0.357955	-0.462374	-2.94961	-2.66811	-5.4469	-0.357955	-0.462374
NCU07134	-2.3228	-1.92396	-1.68263	-0.288737	0.86551	-2.3228	-1.92396	-1.68263	-0.288737	0.86551
NCU07119	-2.60953	-1.60201	-0.815466	0.809619	0.524282	-2.60953	-1.60201	-0.815466	0.809619	0.524282
NCU07142	-2.36011	-1.8715	-0.964649	0.0851836	0.0696485	-2.36011	-1.8715	-0.964649	0.0851836	0.0696485
NCU09176	-2.6922	-3.22884	-1.94988	-0.372365	-0.294558	-2.6922	-3.22884	-1.94988	-0.372365	-0.294558
NCU09169	-3.65875	-1.3232	-3.26425	0.398874	3.32368	-3.65875	-1.3232	-3.26425	0.398874	3.32368
NCU08907	-7.80217	-4.10366	-8.63275	-1.48885	2.68499	-7.80217	-4.10366	-8.63275	-1.48885	2.68499
NCU06420	-2.90927	-2.2243	-2.8176	-0.723209	2.2426	-2.90927	-2.2243	-2.8176	-0.723209	2.2426
NCU05154	-2.10739	-1.08836	-2.33289	0.254065	1.52003	-2.10739	-1.08836	-2.33289	0.254065	1.52003
NCU09182	-4.66682	-1.93691	-4.01331	-1.11632	1.12469	-4.66682	-1.93691	-4.01331	-1.11632	1.12469
NCU04950	-2.42464	-2.87572	-3.16	-1.15539	1.10588	-2.42464	-2.87572	-3.16	-1.15539	1.10588
NCU07617	-0.717748	-3.63156	-1.52352	-3.09439	-1.52247	-0.717748	-3.63156	-1.52352	-3.09439	-1.52247
NCU08770	-1.07498	-2.88735	-2.42946	-2.9939	-0.834485	-1.07498	-2.88735	-2.42946	-2.9939	-0.834485
NCU09904	-5.03465	-3.7442	-6.4831	-0.729452	0.987929	-5.03465	-3.7442	-6.4831	-0.729452	0.987929
NCU05070	-2.9396	-2.15073	-3.86226	0.557291	0.532495	-2.9396	-2.15073	-3.86226	0.557291	0.532495
NCU09906	-5.0012	-3.40614	-5.23685	-0.265691	0.22467	-5.0012	-3.40614	-5.23685	-0.265691	0.22467
NCU11424	-3.36169	-3.0628	-2.23815	0.160532	0.160878	-3.36169	-3.0628	-2.23815	0.160532	0.160878
NCU09619	-3.54648	-3.19247	-4.38135	-1.61311	-0.292097	-3.54648	-3.19247	-4.38135	-1.61311	-0.292097
NCU08641	-2.57806	-1.36877	-2.95704	-2.19431	-2.15365	-2.57806	-1.36877	-2.95704	-2.19431	-2.15365
NCU09523	-2.81472	-2.92073	-2.27296	-1.54076	-1.82856	-2.81472	-2.92073	-2.27296	-1.54076	-1.82856
NCU07231	-2.40742	-3.18282	-2.54742	-1.63422	-1.88385	-2.40742	-3.18282	-2.54742	-1.63422	-1.88385
NCU08557	-3.00161	-4.55036	-2.29821	-2.84146	-0.142708	-3.00161	-4.55036	-2.29821	-2.84146	-0.142708
NCU09183	-3.98785	-2.86766	-4.98514	-2.71048	-0.805704	-3.98785	-2.86766	-4.98514	-2.71048	-0.805704
