# Supplementary material for: The ACF chromatin-remodeling complex is essential for Polycomb repression
Source: eLife journal article supplement (doi:10.7554/elife.77595), 2022-03-04
Supplement: supp [file elife-77595-supp-v1.zip]

## A Summary of unique peptide counts from IP-MS

|                 | 3xFLAG-ISWI | ACF1-HA    | IAF-3-HA   | IAF-1-HA   | IAF-2-HA   |
|-----------------|-------------|------------|------------|------------|------------|
| ISWI<br>129 kDa | <b>326</b>  | 137        | 64         | 177        | 120        |
| ACF1<br>124 kDa | 58          | <b>154</b> | 0          | 21         | 0          |
| IAF-3<br>69 kDa | 52          | 0          | <b>205</b> | 0          | 9          |
| IAF-1<br>74 kDa | 80          | 0          | 33         | <b>130</b> | 0          |
| IAF-2<br>88 kDa | 83          | 0          | 1          | 0          | <b>101</b> |
| HFP-1<br>41 kDa | 21          | 72         | 0          | 0          | 0          |
| HFP-2<br>41 kDa | 7           | 20         | 0          | 0          | 0          |
