# Supplementary figures and images for: The ACF chromatin-remodeling complex is essential for Polycomb repression
Source: eLife journal article supplement (doi:10.7554/elife.77595), 2022-03-04

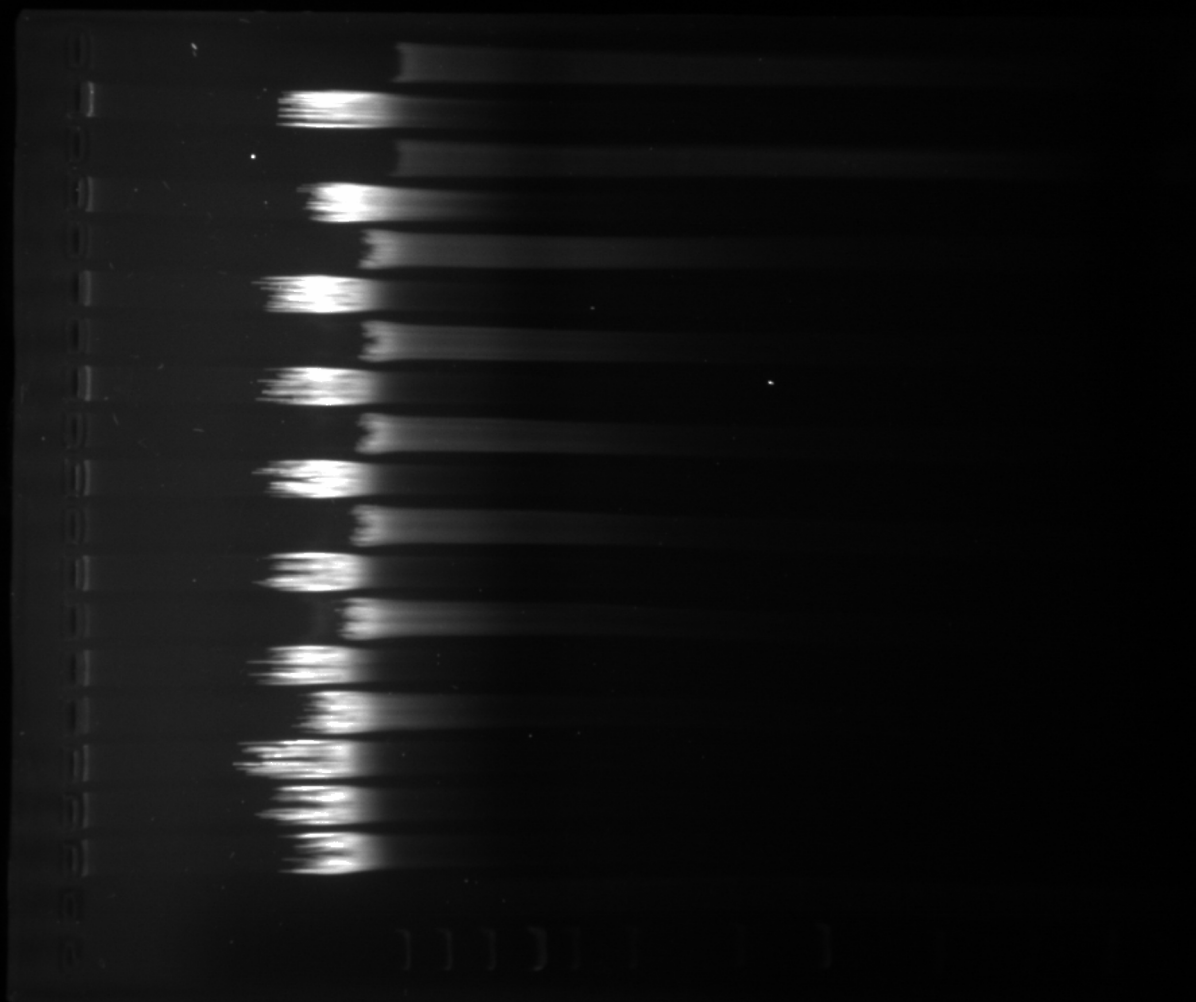

Supplement: fig4-figsupp1-data1 [file elife-77595-fig4-figsupp1-data1-v4.zip]

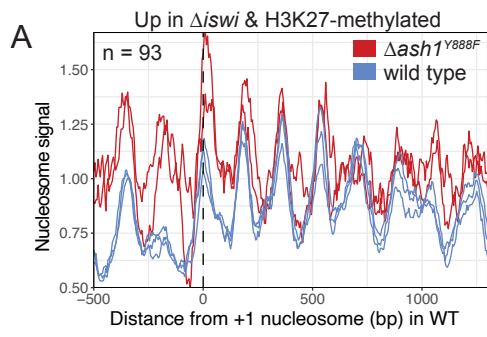

Supplement: supp [file elife-77595-supp-v1.zip]

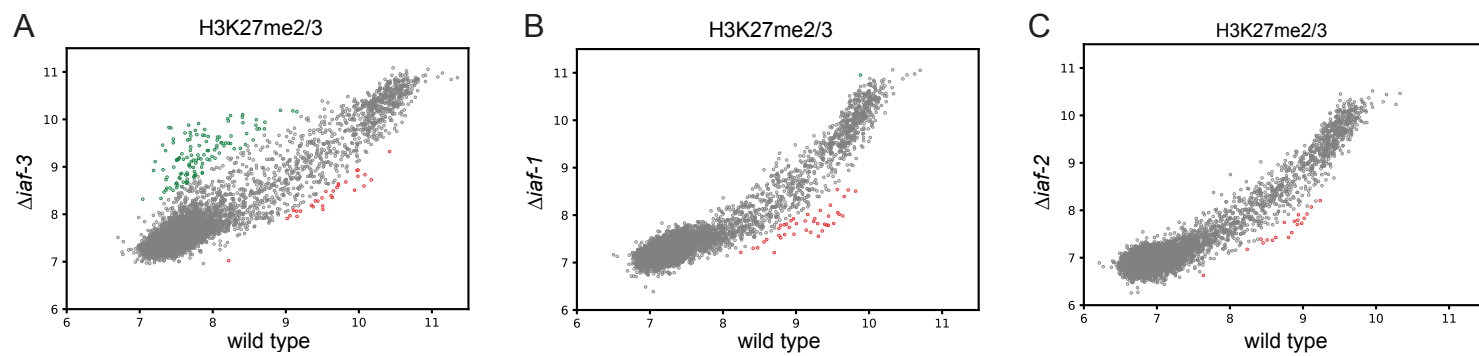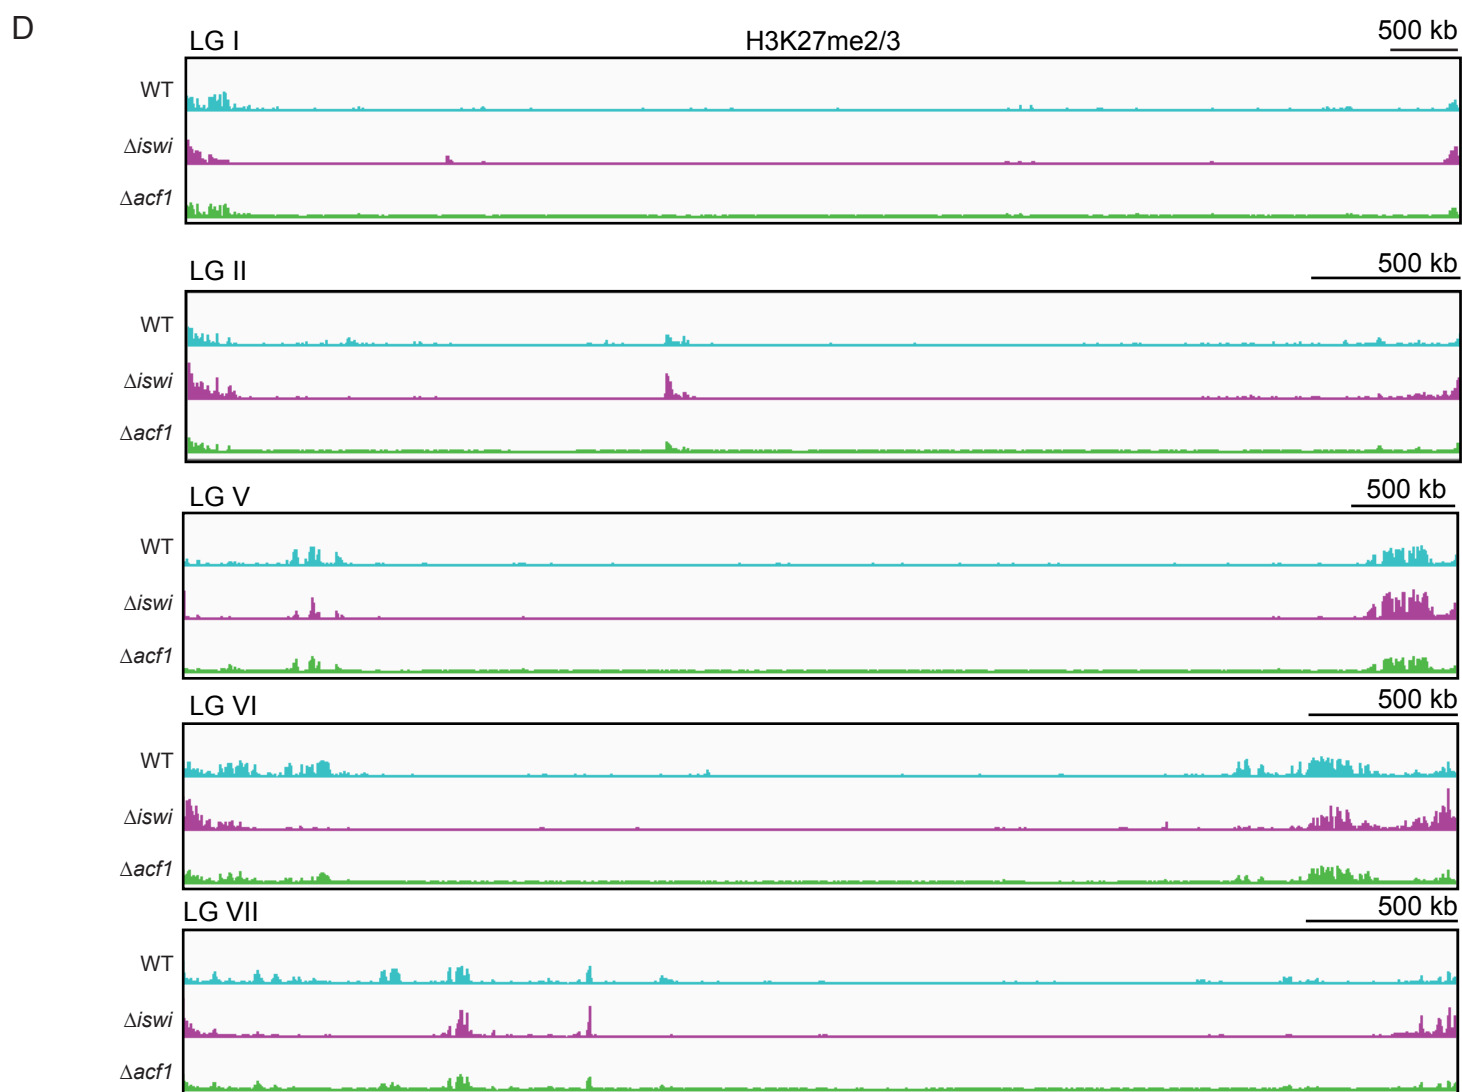

Supplement: supp [file elife-77595-supp-v1.zip]

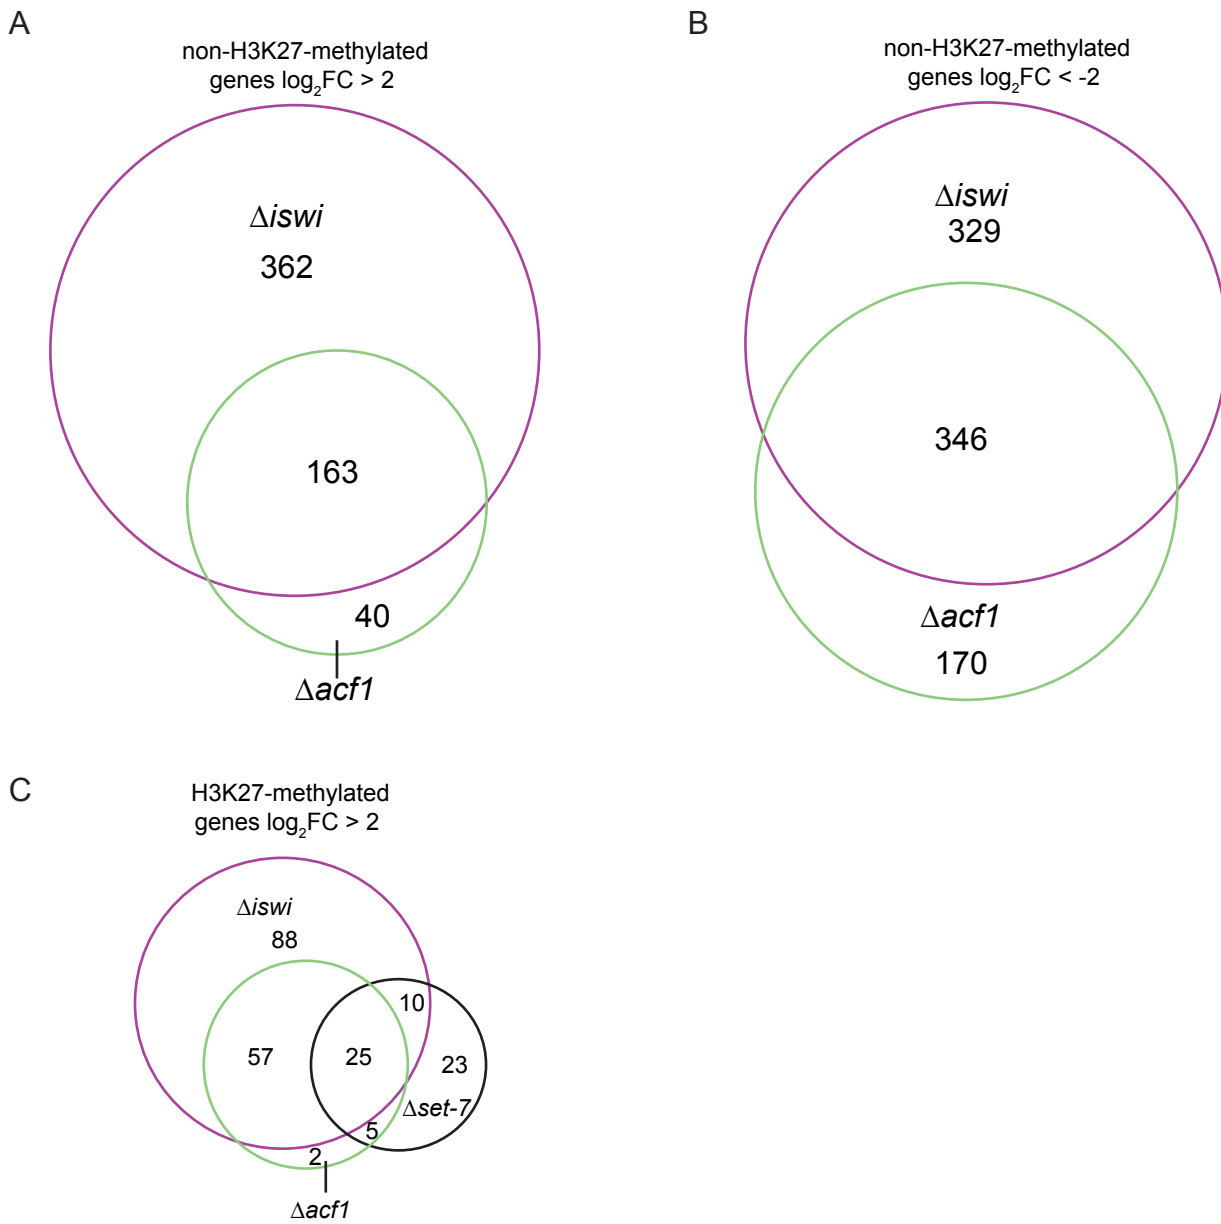

Supplement: supp [file elife-77595-supp-v1.zip]

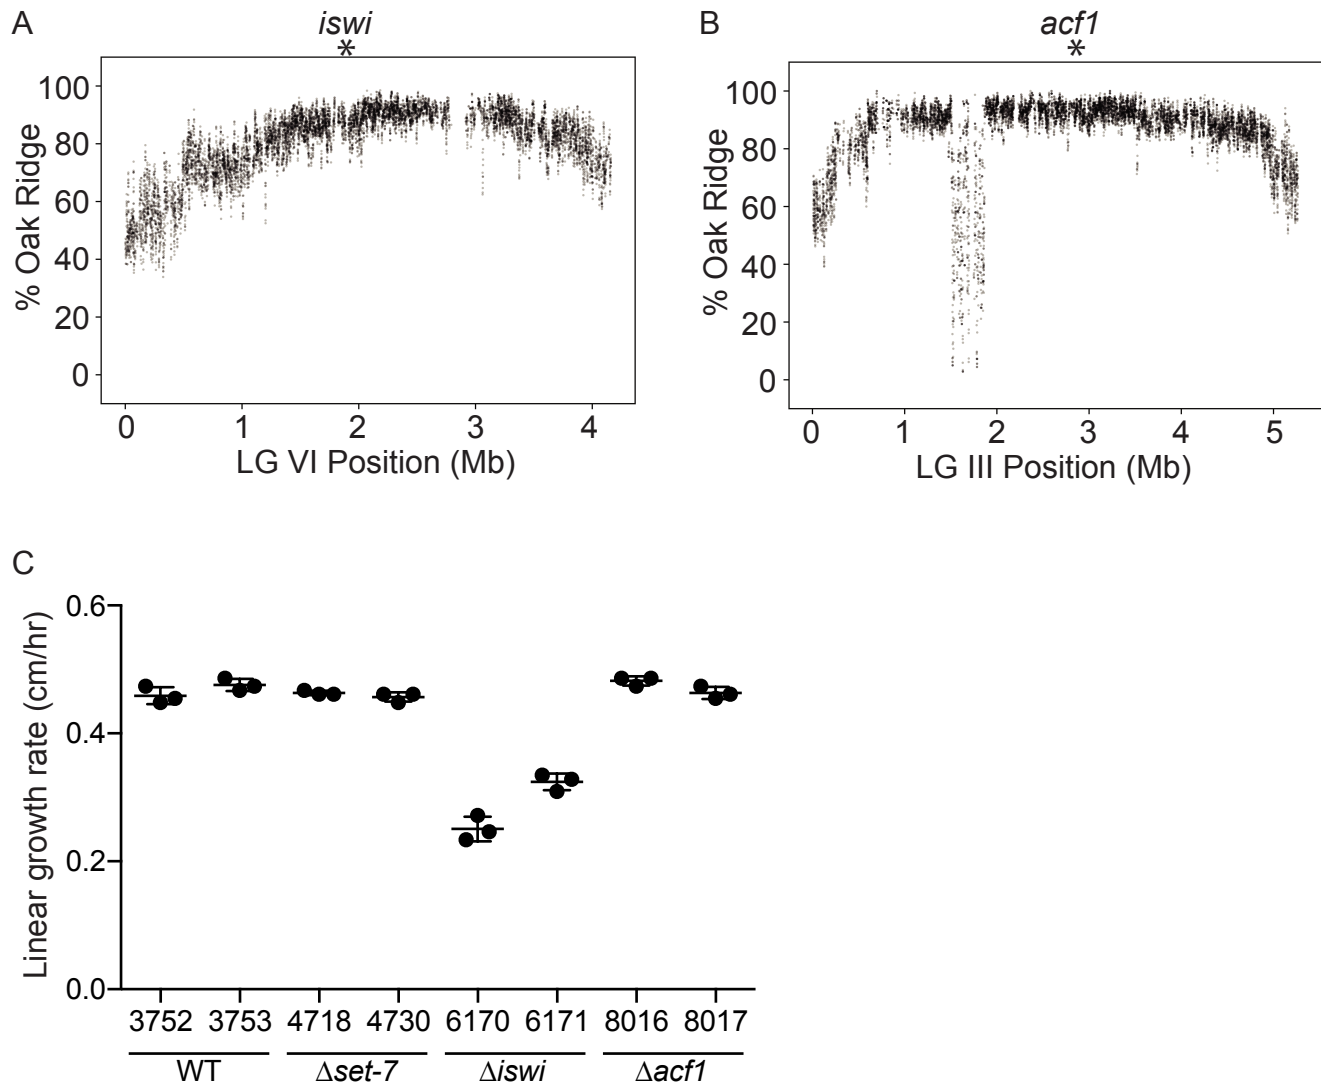

Supplement: supp [file elife-77595-supp-v1.zip]

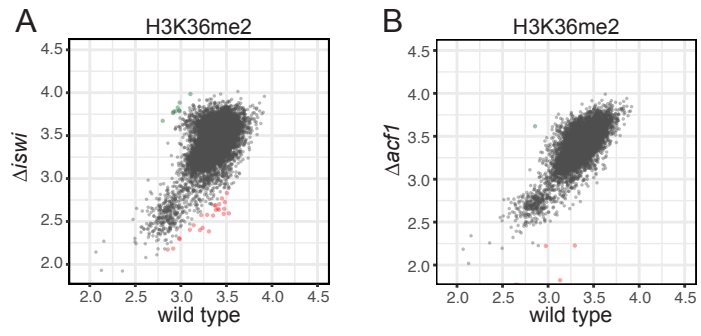

Supplement: supp [file elife-77595-supp-v1.zip]

A

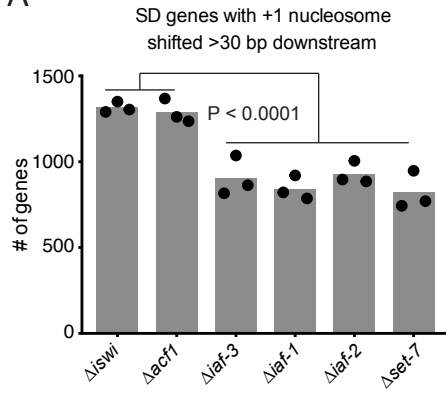

C

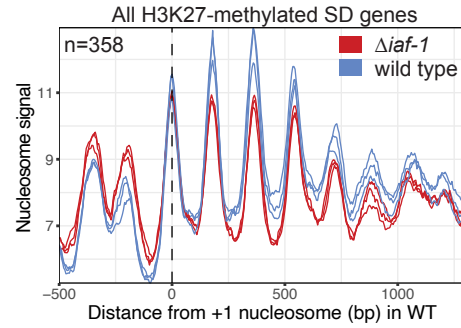

D

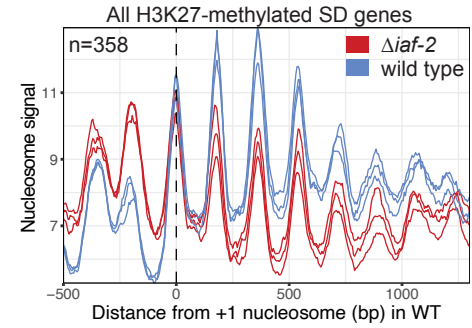B All SD genes (n=7753):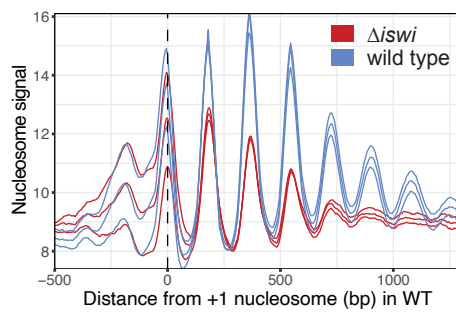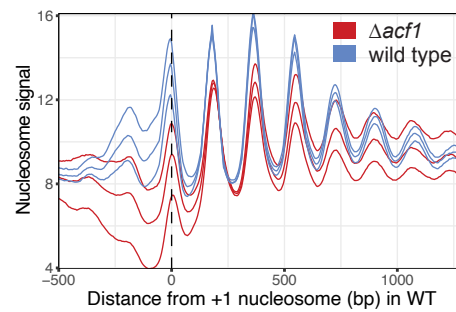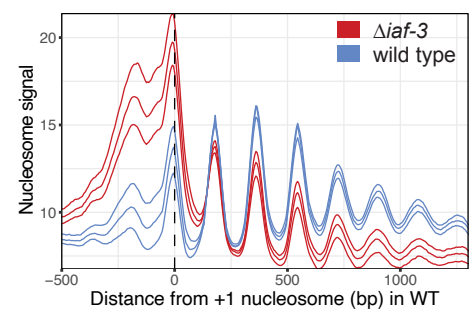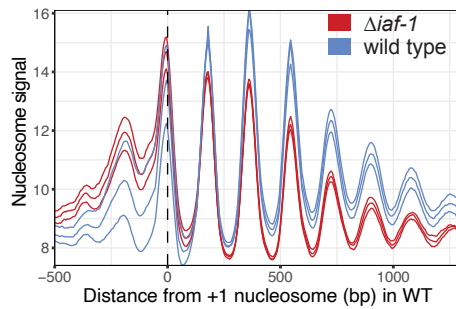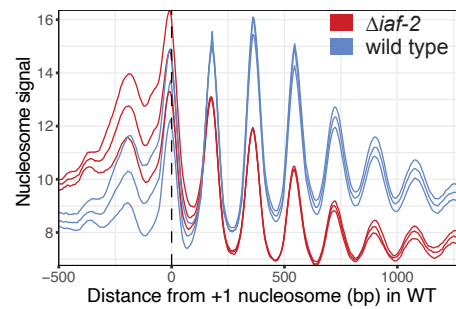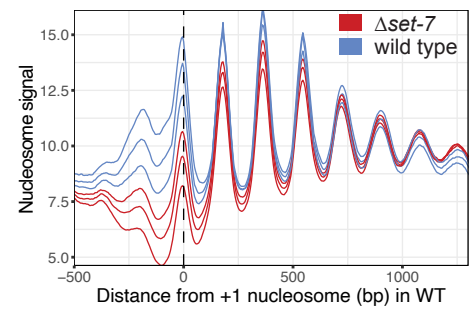

Supplement: supp [file elife-77595-supp-v1.zip]

**A** All genes (n=9730):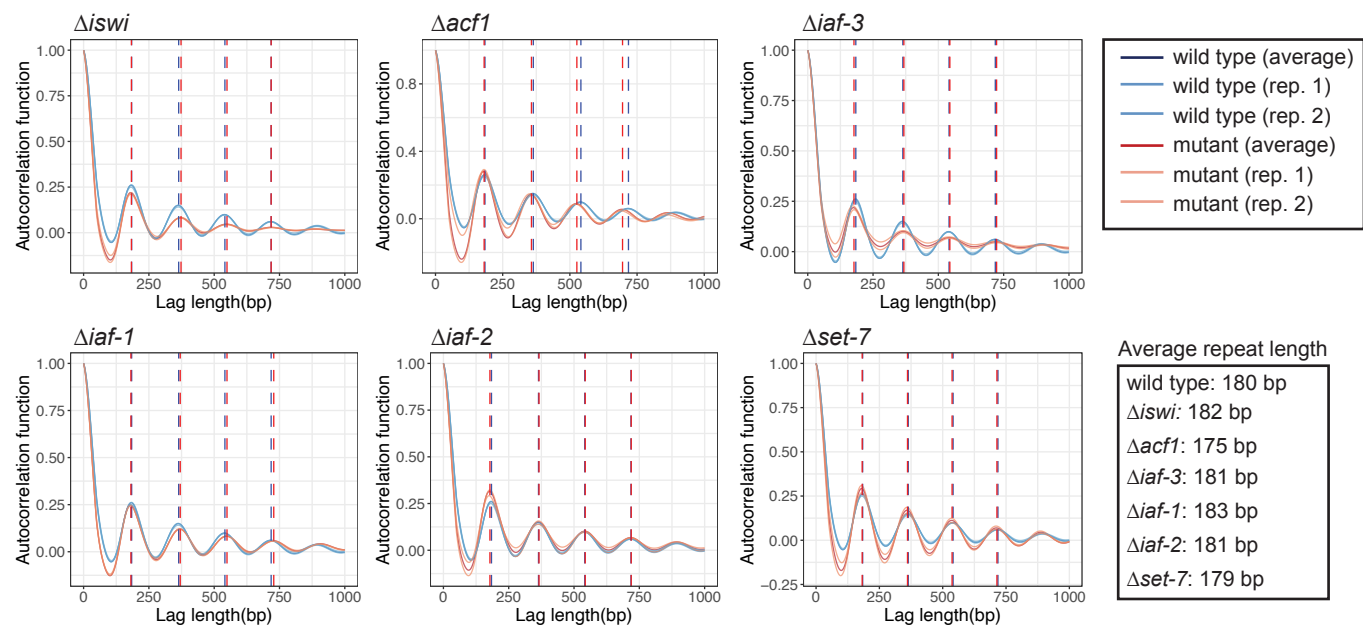**B** All H3K27-methylated genes (n=836):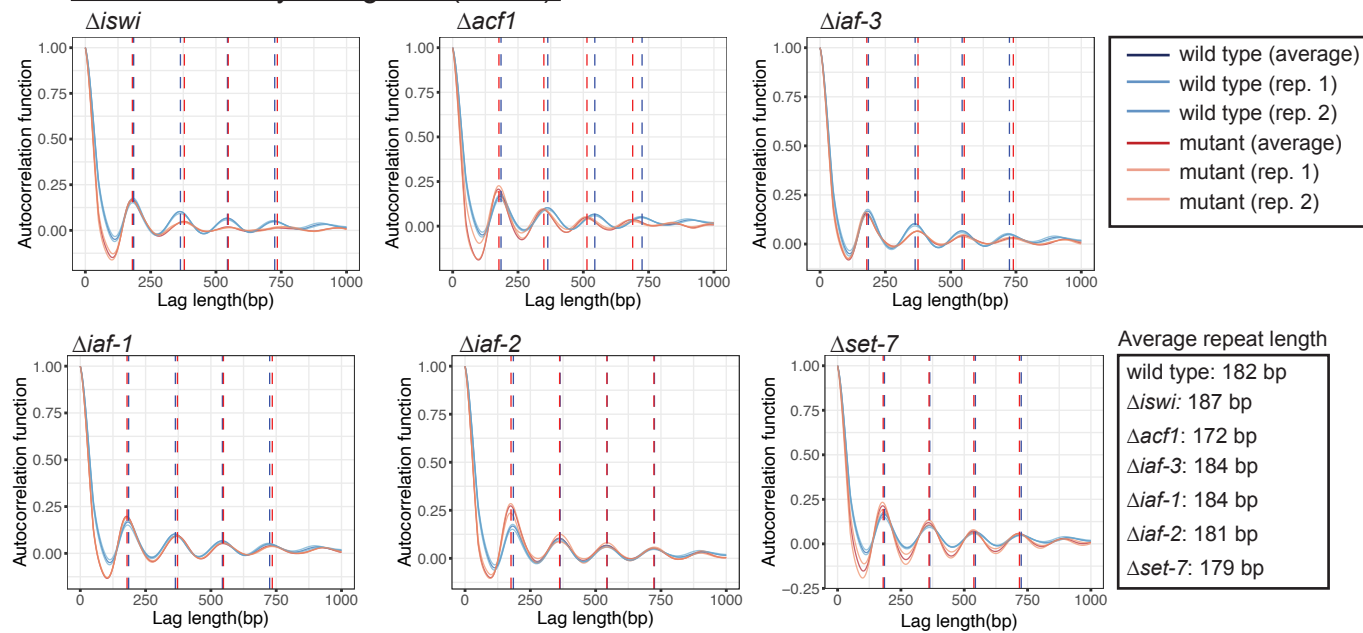

Supplement: supp [file elife-77595-supp-v1.zip]

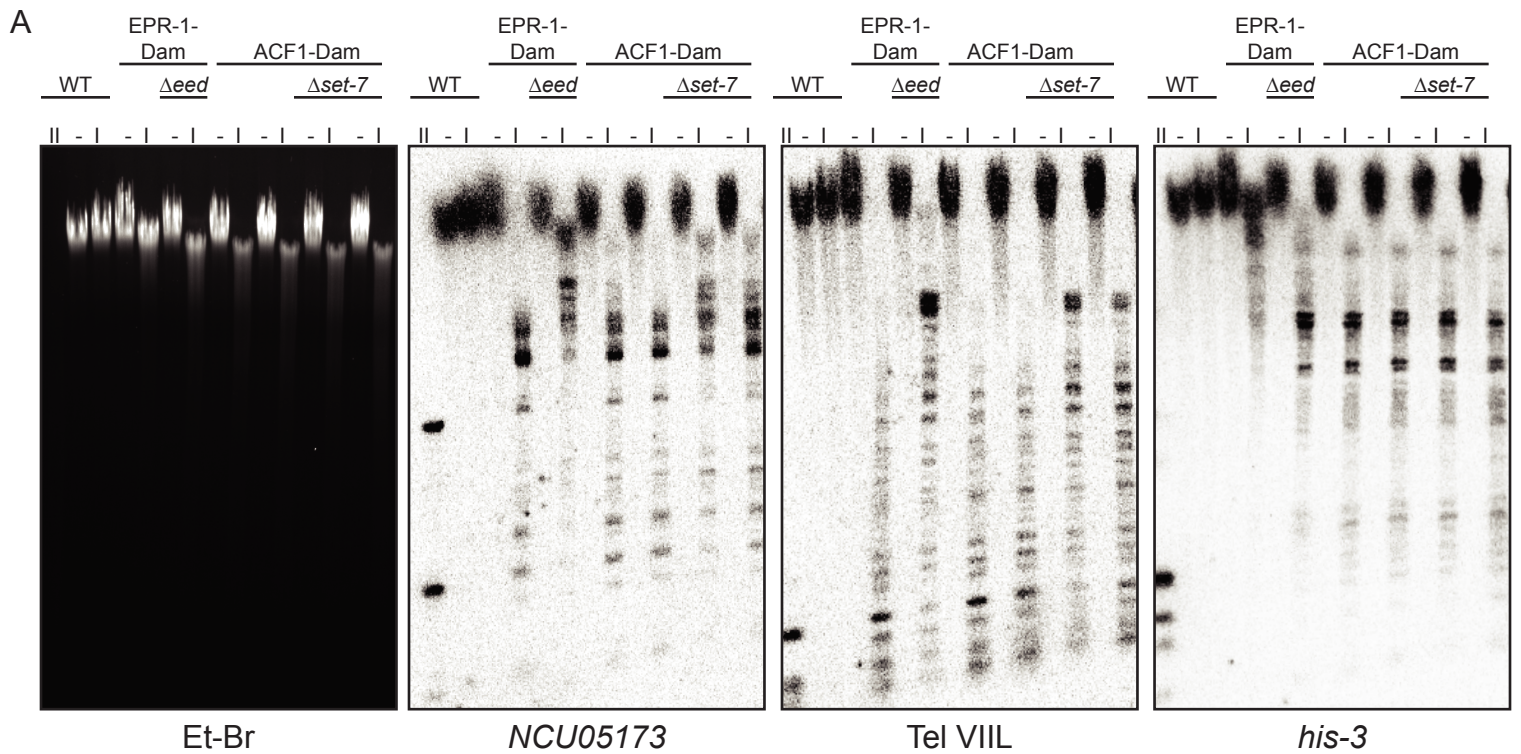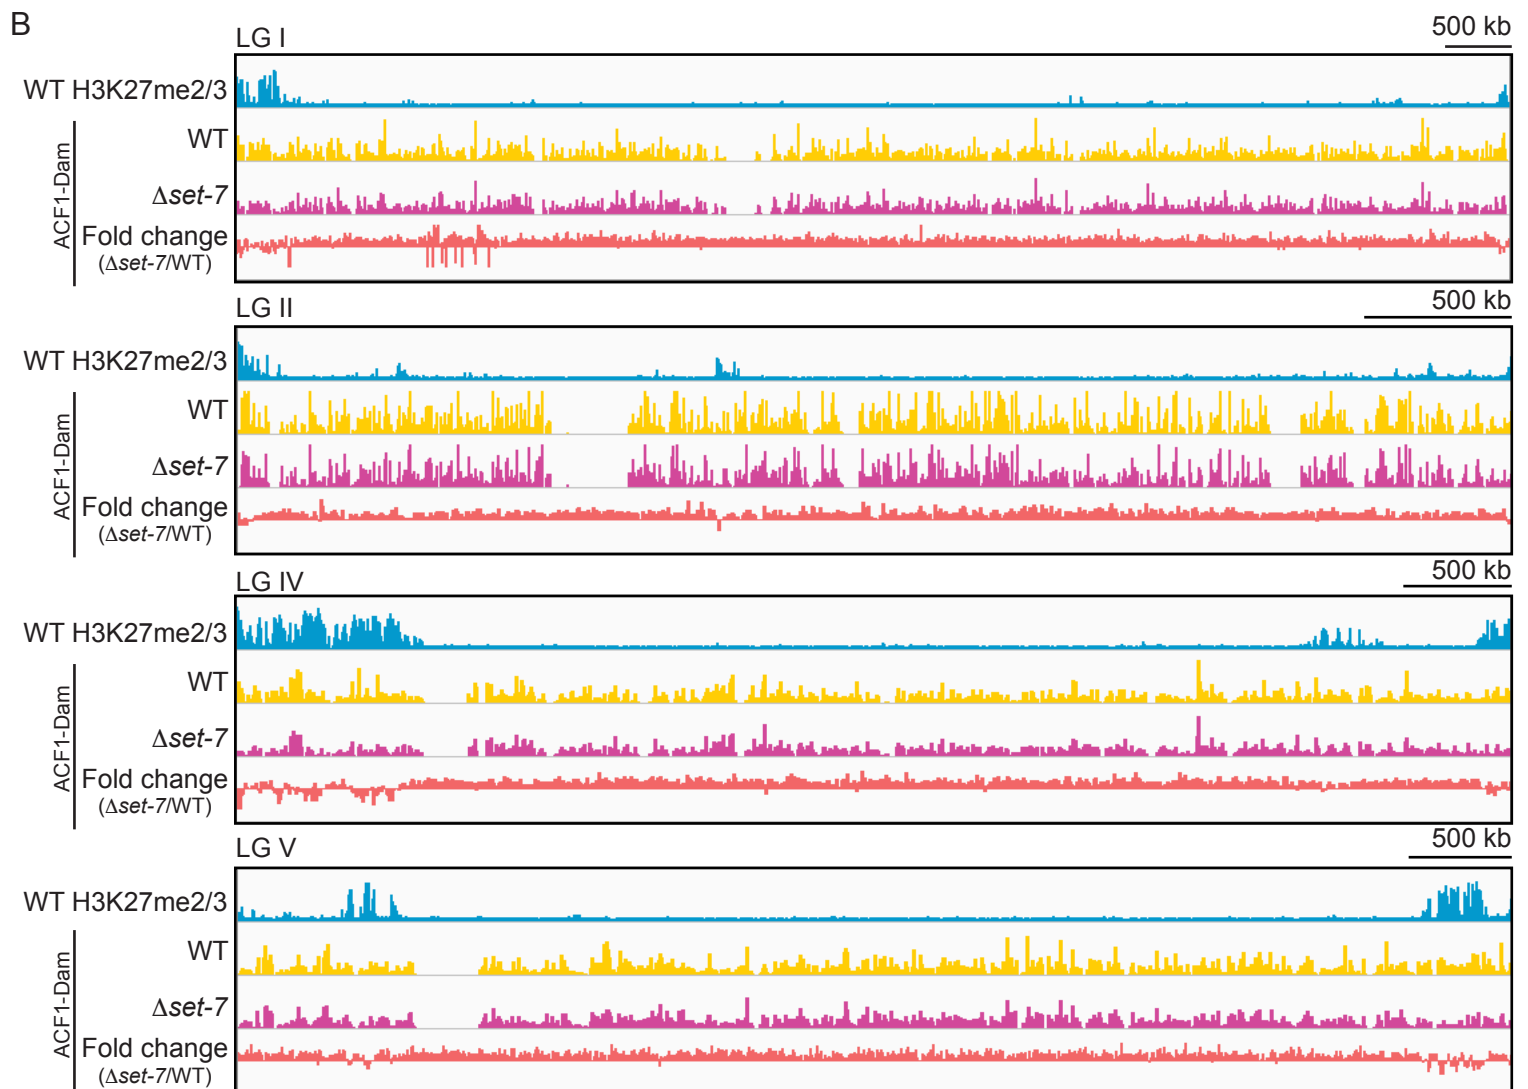

Supplement: supp [file elife-77595-supp-v1.zip]
